# Supplementary material
Source: HighWire-hosted journal article supplement (doi:10.1101/rna.075309.120)
Supplement: Supplementary_Table_2_DEG_analyses_all_genes.xlsx [file Supplementary_Table_2_DEG_analyses_all_genes.xlsx]

## Sheet: A_to_Q
gene_names	gene_biotype	gene_id	logFC	logCPM	PValue	FDR
TSPAN6	protein_coding	ENSG00000000003	0.341425	4.21672	5.45799e-07	3.47577e-06
DPM1	protein_coding	ENSG00000000419	0.0329302	5.97338	0.818385	0.897893
SCYL3	protein_coding	ENSG00000000457	0.0759375	2.94501	0.353173	0.496013
C1orf112	protein_coding	ENSG00000000460	-0.583977	2.30266	6.15719e-10	5.67465e-09
CFH	protein_coding	ENSG00000000971	0.340032	5.69231	3.01479e-06	1.71055e-05
FUCA2	protein_coding	ENSG00000001036	-0.123593	6.95646	0.0170498	0.0423782
GCLC	protein_coding	ENSG00000001084	0.239948	5.36653	0.000191056	0.000784686
NFYA	protein_coding	ENSG00000001167	-0.0497115	5.47714	0.390685	0.535442
STPG1	protein_coding	ENSG00000001460	-0.0815871	3.59873	0.248023	0.381973
NIPAL3	protein_coding	ENSG00000001461	0.325404	6.90465	4.66307e-10	4.3499e-09
LAS1L	protein_coding	ENSG00000001497	-0.371025	4.8126	3.60033e-10	3.40535e-09
ENPP4	protein_coding	ENSG00000001561	0.5671	-2.64737	0.202334	0.326818
SEMA3F	protein_coding	ENSG00000001617	-0.304589	5.86129	8.65857e-08	6.16124e-07
CFTR	protein_coding	ENSG00000001626	-0.545564	-1.68913	0.0674046	0.134413
ANKIB1	protein_coding	ENSG00000001629	-0.0763363	5.75521	0.157155	0.267382
CYP51A1	protein_coding	ENSG00000001630	1.74283	2.95515	3.82762e-71	4.09207e-69
KRIT1	protein_coding	ENSG00000001631	0.011191	2.04505	0.932806	0.977991
RAD52	protein_coding	ENSG00000002016	-0.108922	2.28445	0.229821	0.360776
MYH16	transcribed_unitary_pseudogene	ENSG00000002079	1.0343	-2.31753	0.395595	0.540115
BAD	protein_coding	ENSG00000002330	0.143765	4.6378	0.0204854	0.0495357
LAP3	protein_coding	ENSG00000002549	-0.1594	5.72422	0.00680705	0.0190446
CD99	protein_coding	ENSG00000002586	0.123147	8.50064	0.0336912	0.075593
WNT16	protein_coding	ENSG00000002745	0.232149	3.84544	0.00272975	0.00851659
HECW1	protein_coding	ENSG00000002746	0.600134	1.3103	2.06705e-07	1.39543e-06
MAD1L1	protein_coding	ENSG00000002822	-0.0985945	4.71292	0.100389	0.186622
LASP1	protein_coding	ENSG00000002834	-0.238207	9.57068	2.24579e-05	0.000110504
SNX11	protein_coding	ENSG00000002919	-0.0486325	3.64153	0.545062	0.681039
TMEM176A	protein_coding	ENSG00000002933	0.684533	3.22204	1.04616e-12	1.24859e-11
M6PR	protein_coding	ENSG00000003056	-0.0909067	6.67162	0.0962456	0.180418
KLHL13	protein_coding	ENSG00000003096	-0.162409	2.64145	0.0719162	0.141695
CYP26B1	protein_coding	ENSG00000003137	1.48204	1.42344	2.87427e-25	7.25353e-24
DBNDD1	protein_coding	ENSG00000003249	0.0854227	4.14154	0.218226	0.346678
ALS2	protein_coding	ENSG00000003393	0.103202	5.87919	0.0540495	0.11205
CASP10	protein_coding	ENSG00000003400	-0.134114	-0.510998	0.450096	0.594378
CFLAR	protein_coding	ENSG00000003402	0.279381	6.48188	1.06077e-07	7.44309e-07
TFPI	protein_coding	ENSG00000003436	0.0750456	7.16988	0.172555	0.287755
NDUFAF7	protein_coding	ENSG00000003509	-0.112457	3.63246	0.117597	0.212151
RBM5	protein_coding	ENSG00000003756	0.105676	6.2515	0.0522108	0.108851
MTMR7	protein_coding	ENSG00000003987	0.570929	-1.68436	0.123836	0.22105
SLC7A2	protein_coding	ENSG00000003989	0.845865	7.46659	6.89441e-44	3.52514e-42
ARF5	protein_coding	ENSG00000004059	-0.142684	5.23455	0.0221909	0.0531786
SARM1	protein_coding	ENSG00000004139	0.033044	3.9258	0.636018	0.758424
POLDIP2	protein_coding	ENSG00000004142	-0.108712	6.73451	0.0353616	0.0787004
PLXND1	protein_coding	ENSG00000004399	-0.0934987	6.57252	0.085598	0.164018
AK2	protein_coding	ENSG00000004455	-0.369412	6.3142	1.66449e-11	1.77842e-10
FKBP4	protein_coding	ENSG00000004478	-0.439161	5.94293	6.55338e-12	7.2614e-11
KDM1A	protein_coding	ENSG00000004487	-0.181445	6.35738	0.00118348	0.00404427
RBM6	protein_coding	ENSG00000004534	0.079383	6.13024	0.139106	0.242618
CAMKK1	protein_coding	ENSG00000004660	0.543905	2.41932	2.5476e-07	1.70226e-06
RECQL	protein_coding	ENSG00000004700	0.073296	6.04565	0.236318	0.368516
VPS50	protein_coding	ENSG00000004766	0.102667	4.02487	0.212758	0.339735
HSPB6	protein_coding	ENSG00000004776	-0.493591	5.78302	1.55657e-09	1.36403e-08
ARHGAP33	protein_coding	ENSG00000004777	-0.332166	1.90246	0.0319439	0.0723351
NDUFAB1	protein_coding	ENSG00000004779	0.0439655	4.9909	0.465549	0.608362
PDK4	protein_coding	ENSG00000004799	1.04556	-3.10499	0.0107268	0.0283562
ZMYND10	protein_coding	ENSG00000004838	-0.174358	-2.54059	0.667608	0.783853
SLC25A13	protein_coding	ENSG00000004864	-0.395419	4.12063	1.57161e-08	1.2316e-07
ST7	protein_coding	ENSG00000004866	0.204553	4.58104	0.00133578	0.00449849
CDC27	protein_coding	ENSG00000004897	-0.143584	7.06466	0.0113999	0.0299158
HCCS	protein_coding	ENSG00000004961	-0.198989	5.16948	0.00088827	0.00314073
DVL2	protein_coding	ENSG00000004975	0.605133	4.86057	4.25249e-26	1.11132e-24
UPF1	protein_coding	ENSG00000005007	-0.185997	6.98547	0.00100725	0.00352187
SKAP2	protein_coding	ENSG00000005020	0.235297	4.86381	0.000100773	0.000439684
SLC25A5	protein_coding	ENSG00000005022	-0.339052	6.38196	3.4018e-10	3.23318e-09
MCUB	protein_coding	ENSG00000005059	0.0194732	2.62718	0.848787	0.920372
POLR2J	protein_coding	ENSG00000005075	-0.0412653	5.1274	0.548596	0.684242
DHX33	protein_coding	ENSG00000005100	-0.327511	5.29924	7.63608e-07	4.76647e-06
MEOX1	protein_coding	ENSG00000005102	0.386292	-2.11655	1	1
LIG3	protein_coding	ENSG00000005156	-0.270175	4.86723	4.12021e-06	2.28411e-05
RPAP3	protein_coding	ENSG00000005175	-0.129453	5.19192	0.0606979	0.12324
REXO5	protein_coding	ENSG00000005189	-0.724585	0.895858	2.27456e-08	1.746e-07
CIAPIN1	protein_coding	ENSG00000005194	-0.195541	4.50711	0.00135259	0.00454816
SPPL2B	protein_coding	ENSG00000005206	-0.177237	3.96473	0.205203	0.330301
FAM214B	protein_coding	ENSG00000005238	0.333736	5.72714	3.3592e-07	2.20366e-06
COPZ2	protein_coding	ENSG00000005243	0.24971	4.64759	6.73868e-05	0.000305187
PRKAR2B	protein_coding	ENSG00000005249	-0.113337	3.44774	0.260059	0.395298
MSL3	protein_coding	ENSG00000005302	0.131075	4.40282	0.0418789	0.0906212
CREBBP	protein_coding	ENSG00000005339	0.130483	6.40688	0.0344062	0.0770211
TSPOAP1	protein_coding	ENSG00000005379	0.51834	0.599487	0.00209994	0.00675103
GCFC2	protein_coding	ENSG00000005436	0.0513872	3.21744	0.545457	0.681435
WDR54	protein_coding	ENSG00000005448	-0.126361	1.98463	0.242725	0.375717
CROT	protein_coding	ENSG00000005469	0.158841	3.99991	0.0382429	0.0840316
KMT2E	protein_coding	ENSG00000005483	0.221976	6.33107	5.51327e-05	0.000254259
RHBDD2	protein_coding	ENSG00000005486	0.195692	4.86403	0.00392432	0.011751
SOX8	protein_coding	ENSG00000005513	1.19804	1.23727	0.000500438	0.00187824
IBTK	protein_coding	ENSG00000005700	0.0778315	6.55211	0.247386	0.381126
ZNF195	protein_coding	ENSG00000005801	-0.0794279	4.06508	0.262925	0.398694
MYCBP2	protein_coding	ENSG00000005810	-0.146002	6.00146	0.0393647	0.086121
FBXL3	protein_coding	ENSG00000005812	0.167141	5.55324	0.00808961	0.022193
PDK2	protein_coding	ENSG00000005882	0.386668	4.12951	3.46038e-10	3.28354e-09
ITGA3	protein_coding	ENSG00000005884	-0.373776	7.7015	5.93134e-12	6.60536e-11
ZFX	protein_coding	ENSG00000005889	-0.106015	5.14641	0.0609261	0.123618
LAMP2	protein_coding	ENSG00000005893	0.145399	7.38123	0.00856649	0.0232886
ITGA2B	protein_coding	ENSG00000005961	-2.04039	-3.39214	0.00180056	0.00587639
GDE1	protein_coding	ENSG00000006007	0.199379	6.45687	0.000511558	0.00191468
REX1BD	protein_coding	ENSG00000006015	0.251732	4.14973	0.000144369	0.000609397
CRLF1	protein_coding	ENSG00000006016	-0.292493	4.65272	3.62392e-06	2.02361e-05
OSBPL7	protein_coding	ENSG00000006025	0.305368	0.957119	0.0287959	0.0662614
TMEM98	protein_coding	ENSG00000006042	0.336063	6.13359	3.64199e-10	3.43922e-09
MAP3K14	protein_coding	ENSG00000006062	-0.211312	3.81397	0.0071944	0.0200204
TMEM132A	protein_coding	ENSG00000006118	0.122536	6.06445	0.105244	0.193628
AP2B1	protein_coding	ENSG00000006125	0.0561462	8.09235	0.283489	0.421862
ZNF263	protein_coding	ENSG00000006194	0.0318362	4.87535	0.620572	0.746464
CX3CL1	protein_coding	ENSG00000006210	1.69571	-3.87762	0.0092938	0.0250256
SPATA20	protein_coding	ENSG00000006282	0.067492	5.0503	0.268929	0.405636
CACNA1G	protein_coding	ENSG00000006283	0.662498	-1.32818	0.0729619	0.143404
TNFRSF12A	protein_coding	ENSG00000006327	-0.272681	8.01864	2.70521e-07	1.80075e-06
MAP3K9	protein_coding	ENSG00000006432	0.197235	-2.44984	0.665618	0.781999
RALA	protein_coding	ENSG00000006451	0.0351285	6.6103	0.62019	0.746259
BAIAP2L1	protein_coding	ENSG00000006453	-0.759012	3.55785	1.56065e-25	4.0131e-24
KDM7A	protein_coding	ENSG00000006459	0.65442	4.45831	4.01884e-18	7.03995e-17
ETV1	protein_coding	ENSG00000006468	0.890349	4.13156	3.57112e-31	1.13128e-29
AGK	protein_coding	ENSG00000006530	-0.192713	4.66038	0.00129523	0.00437769
ALDH3B1	protein_coding	ENSG00000006534	0.0700222	4.27554	0.271853	0.409206
PHTF2	protein_coding	ENSG00000006576	0.404058	6.9225	1.40623e-13	1.79623e-12
FARP2	protein_coding	ENSG00000006607	-0.0784996	5.51665	0.175902	0.292396
GGCT	protein_coding	ENSG00000006625	-0.595378	1.80933	1.04125e-08	8.33003e-08
DBF4	protein_coding	ENSG00000006634	-0.571116	3.90927	2.454e-15	3.56872e-14
TBXA2R	protein_coding	ENSG00000006638	-0.242377	1.11653	0.0732621	0.143913
IFRD1	protein_coding	ENSG00000006652	-0.249601	5.60947	9.28966e-06	4.85972e-05
COX10	protein_coding	ENSG00000006695	-0.286752	3.46112	9.48412e-05	0.000415342
GTF2IRD1	protein_coding	ENSG00000006704	0.0310564	4.21404	0.621395	0.746995
PAF1	protein_coding	ENSG00000006712	-0.131703	6.11284	0.0132944	0.0341706
VPS41	protein_coding	ENSG00000006715	0.0950356	5.49002	0.101845	0.188553
ARHGAP44	protein_coding	ENSG00000006740	-0.553799	0.0845788	0.00115258	0.00395402
ELAC2	protein_coding	ENSG00000006744	-0.177955	5.65708	0.0011784	0.00403121
ARSD	protein_coding	ENSG00000006756	0.441709	3.86552	1.21004e-11	1.30791e-10
PNPLA4	protein_coding	ENSG00000006757	0.161104	2.20457	0.0801323	0.155084
MYH13	protein_coding	ENSG00000006788	-2.58312	-3.43076	2.97715e-05	0.000143489
ADIPOR2	protein_coding	ENSG00000006831	0.245071	6.53339	5.31042e-06	2.87879e-05
CDKL3	protein_coding	ENSG00000006837	0.563016	-0.498507	0.00504815	0.0146487
MARK4	protein_coding	ENSG00000007047	0.028501	5.97165	0.604986	0.733457
CCDC124	protein_coding	ENSG00000007080	-0.240125	5.97954	0.000340516	0.00132716
PAFAH1B1	protein_coding	ENSG00000007168	0.0791451	7.30244	0.130447	0.230385
KIAA0100	protein_coding	ENSG00000007202	0.123886	7.46828	0.0191426	0.0467372
GAS7	protein_coding	ENSG00000007237	0.586148	4.95471	4.41605e-25	1.10339e-23
TRAPPC6A	protein_coding	ENSG00000007255	0.676365	0.836088	2.74377e-06	1.56483e-05
ST7L	protein_coding	ENSG00000007341	0.127368	4.33031	0.0475044	0.100731
RPUSD1	protein_coding	ENSG00000007376	-0.162186	4.56208	0.00815836	0.0223425
RHBDF1	protein_coding	ENSG00000007384	0.468857	5.98068	5.60317e-12	6.25173e-11
LUC7L	protein_coding	ENSG00000007392	-0.0869966	5.29483	0.180907	0.299029
BAIAP3	protein_coding	ENSG00000007516	-0.10972	-0.85603	0.642919	0.764354
TSR3	protein_coding	ENSG00000007520	-0.0171327	5.52907	0.775763	0.868634
PIGQ	protein_coding	ENSG00000007541	0.0502273	3.47741	0.564865	0.698557
CRAMP1	protein_coding	ENSG00000007545	0.118025	3.5181	0.181941	0.300479
TEAD3	protein_coding	ENSG00000007866	-0.105865	6.39264	0.0778525	0.151413
DNAJC11	protein_coding	ENSG00000007923	-0.196435	6.0785	0.000382696	0.00147204
FMO3	protein_coding	ENSG00000007933	1.1087	0.838098	6.42669e-15	9.01884e-14
MYLIP	protein_coding	ENSG00000007944	-0.823857	1.91842	1.80884e-15	2.659e-14
E2F2	protein_coding	ENSG00000007968	-0.986535	0.657403	1.71236e-11	1.82734e-10
PSMB1	protein_coding	ENSG00000008018	0.103338	7.01837	0.243844	0.377052
SYN1	protein_coding	ENSG00000008056	-0.609863	2.17745	1.89392e-05	9.42151e-05
JARID2	protein_coding	ENSG00000008083	-0.249237	5.75964	3.97011e-05	0.000187504
CDKL5	protein_coding	ENSG00000008086	-0.0948746	4.94933	0.117333	0.211775
CAMK1G	protein_coding	ENSG00000008118	-0.252572	-0.0032653	0.236129	0.368287
CDK11A	protein_coding	ENSG00000008128	0.125487	-1.7634	0.769915	0.863896
NADK	protein_coding	ENSG00000008130	-0.0315892	5.18926	0.579691	0.711059
DLEC1	protein_coding	ENSG00000008226	2.25205	-3.57123	0.004187	0.0124404
CYTH3	protein_coding	ENSG00000008256	0.277589	6.70608	3.71359e-07	2.42083e-06
ADAM22	protein_coding	ENSG00000008277	-0.0102147	-2.29304	1	1
SYPL1	protein_coding	ENSG00000008282	0.104044	6.19273	0.103284	0.190899
CYB561	protein_coding	ENSG00000008283	-0.29977	3.0457	0.000668871	0.0024393
SPAG9	protein_coding	ENSG00000008294	0.164345	7.063	0.00244604	0.00772158
CELSR3	protein_coding	ENSG00000008300	0.615341	1.72794	1.16201e-07	8.09232e-07
AASS	protein_coding	ENSG00000008311	0.292125	4.56918	2.2193e-05	0.000109262
SS18L2	protein_coding	ENSG00000008324	-0.070168	2.33205	0.514295	0.653426
MPND	protein_coding	ENSG00000008382	-0.368837	2.10732	5.517e-05	0.000254308
MGST1	protein_coding	ENSG00000008394	-0.0618623	7.4704	0.276428	0.414149
CRY1	protein_coding	ENSG00000008405	-0.521823	5.33793	1.00369e-18	1.82904e-17
NFIX	protein_coding	ENSG00000008441	0.244597	7.22529	2.3897e-05	0.000117095
ST3GAL1	protein_coding	ENSG00000008513	-0.283567	8.25282	3.12448e-07	2.05963e-06
MMP25	protein_coding	ENSG00000008516	-0.88585	-0.752943	0.395097	0.539686
IL32	protein_coding	ENSG00000008517	1.55871	2.51325	4.1089e-43	2.03598e-41
PKD1	protein_coding	ENSG00000008710	0.370386	7.38367	5.6691e-08	4.15467e-07
MAPK8IP2	protein_coding	ENSG00000008735	0.547043	-1.23659	0.0412579	0.0894749
MED24	protein_coding	ENSG00000008838	-0.0966371	5.33575	0.110396	0.201513
RHOBTB2	protein_coding	ENSG00000008853	0.00586641	4.36668	0.924302	0.972382
HEATR5B	protein_coding	ENSG00000008869	0.0254391	4.18694	0.679298	0.793144
SEC62	protein_coding	ENSG00000008952	0.126317	8.0825	0.0734027	0.144142
RPS20	protein_coding	ENSG00000008988	0.195362	8.29961	0.0190972	0.0466586
CSDE1	protein_coding	ENSG00000009307	0.120015	9.50658	0.0322558	0.0729849
UBE3C	protein_coding	ENSG00000009335	-0.132797	7.25842	0.0189564	0.0463658
REV3L	protein_coding	ENSG00000009413	-0.0644684	5.34582	0.277699	0.415418
FAM76A	protein_coding	ENSG00000009780	0.262177	1.94577	0.00655794	0.0184237
POMT2	protein_coding	ENSG00000009830	0.3583	4.34992	1.08787e-08	8.6754e-08
VTA1	protein_coding	ENSG00000009844	-0.104768	6.12087	0.0783133	0.152242
BAZ1B	protein_coding	ENSG00000009954	-0.0756581	7.18531	0.160009	0.271401
RANBP9	protein_coding	ENSG00000010017	-0.0104272	5.87189	0.854612	0.924189
ETV7	protein_coding	ENSG00000010030	-0.491694	-2.54071	0.199684	0.323426
SPRTN	protein_coding	ENSG00000010072	-0.104773	4.01737	0.11552	0.209023
METTL13	protein_coding	ENSG00000010165	-0.227042	4.65222	0.000124789	0.000533584
DYRK4	protein_coding	ENSG00000010219	0.0113778	2.69927	0.908227	0.961537
ZNF207	protein_coding	ENSG00000010244	-0.26603	6.90293	1.62041e-06	9.56945e-06
UQCRC1	protein_coding	ENSG00000010256	-0.436421	6.79242	2.4e-16	3.74986e-15
STARD3NL	protein_coding	ENSG00000010270	-0.0476892	5.30879	0.441995	0.586534
CD9	protein_coding	ENSG00000010278	0.0243109	6.98019	0.750181	0.849153
NCAPD2	protein_coding	ENSG00000010292	-0.592884	5.75061	3.99573e-27	1.09448e-25
IFFO1	protein_coding	ENSG00000010295	0.0518609	4.76442	0.427311	0.572604
GIPR	protein_coding	ENSG00000010310	-0.280386	-0.146558	0.197402	0.320337
PHF7	protein_coding	ENSG00000010318	0.119463	0.643814	0.392481	0.53707
SEMA3G	protein_coding	ENSG00000010319	0.0731094	-3.35487	1	1
NISCH	protein_coding	ENSG00000010322	0.18755	6.29016	0.00293515	0.00907893
FUZ	protein_coding	ENSG00000010361	0.155643	1.83818	0.14566	0.25129
IDS	protein_coding	ENSG00000010404	0.450486	6.23018	6.24992e-16	9.47152e-15
PRSS3	protein_coding	ENSG00000010438	-0.523416	0.398087	0.034444	0.0770666
ZNF200	protein_coding	ENSG00000010539	-0.00933486	3.06396	0.928438	0.975078
CD4	protein_coding	ENSG00000010610	0.137738	5.69965	0.0110662	0.0291398
LRRC23	protein_coding	ENSG00000010626	0.300567	1.83299	0.00325889	0.00997169
HFE	protein_coding	ENSG00000010704	0.223976	3.66447	0.000748908	0.00269772
SCMH1	protein_coding	ENSG00000010803	-0.0653319	4.82516	0.294059	0.433449
FYN	protein_coding	ENSG00000010810	0.40328	4.59731	1.22616e-11	1.32371e-10
HIVEP2	protein_coding	ENSG00000010818	-0.167961	6.50972	0.00686252	0.0191819
ELOA	protein_coding	ENSG00000011007	-0.0638701	6.7479	0.270414	0.407283
LYPLA2	protein_coding	ENSG00000011009	-0.232078	5.46954	6.50146e-05	0.000295353
CLCN6	protein_coding	ENSG00000011021	1.17512	4.72398	2.64747e-65	2.45797e-63
MRC2	protein_coding	ENSG00000011028	-0.0245148	9.20734	0.653974	0.77242
TSPAN9	protein_coding	ENSG00000011105	0.348831	6.07082	6.29769e-10	5.79203e-09
BTBD7	protein_coding	ENSG00000011114	0.110016	5.79348	0.0468195	0.0995295
APBA3	protein_coding	ENSG00000011132	0.0501951	3.55896	0.52861	0.665906
MKS1	protein_coding	ENSG00000011143	0.0165585	2.06828	0.869416	0.933957
ABHD5	protein_coding	ENSG00000011198	-0.415561	6.45215	2.52492e-12	2.90539e-11
ANOS1	protein_coding	ENSG00000011201	1.13791	-3.46891	0.144091	0.249364
AKAP8L	protein_coding	ENSG00000011243	0.239546	5.47961	8.38289e-06	4.41021e-05
MBTD1	protein_coding	ENSG00000011258	0.458567	3.11419	6.72906e-09	5.49032e-08
UTP18	protein_coding	ENSG00000011260	-0.430074	4.91013	7.79719e-11	7.80162e-10
RNF216	protein_coding	ENSG00000011275	0.0425248	6.19816	0.424796	0.570188
TTC19	protein_coding	ENSG00000011295	0.0850028	4.26996	0.224112	0.353956
PTBP1	protein_coding	ENSG00000011304	-0.234118	8.39405	5.92916e-06	3.18873e-05
DPF1	protein_coding	ENSG00000011332	-0.543287	2.25769	6.34994e-08	4.60959e-07
SYT7	protein_coding	ENSG00000011347	2.6079	-0.742153	3.88617e-11	4.01829e-10
LARS2	protein_coding	ENSG00000011376	-0.299376	4.95204	3.37141e-07	2.21085e-06
PIK3C2A	protein_coding	ENSG00000011405	0.0664936	6.2813	0.233316	0.365092
PLAUR	protein_coding	ENSG00000011422	-0.308451	7.67173	1.701e-08	1.32593e-07
ANLN	protein_coding	ENSG00000011426	-1.13158	6.95228	1.8174e-94	3.02443e-92
WIZ	protein_coding	ENSG00000011451	-0.0781181	6.37092	0.209372	0.33533
RABGAP1	protein_coding	ENSG00000011454	0.106957	5.89028	0.0439729	0.0945032
DCN	protein_coding	ENSG00000011465	1.09784	11.8381	4.64344e-75	5.61029e-73
QPCTL	protein_coding	ENSG00000011478	0.407387	3.20756	1.26149e-05	6.43649e-05
PPP5C	protein_coding	ENSG00000011485	-0.351557	5.77269	5.91398e-11	6.00591e-10
CEP68	protein_coding	ENSG00000011523	0.44755	3.51862	1.45402e-10	1.42574e-09
MAP4K3	protein_coding	ENSG00000011566	0.0621377	6.27531	0.275761	0.413534
TMEM159	protein_coding	ENSG00000011638	0.376683	4.11431	1.77159e-08	1.37488e-07
BRCA1	protein_coding	ENSG00000012048	-0.82663	3.28099	2.4055e-29	7.16774e-28
ERCC1	protein_coding	ENSG00000012061	0.054104	6.60784	0.337693	0.479737
SEMA3B	protein_coding	ENSG00000012171	0.817289	6.60061	1.90948e-49	1.16551e-47
MBTPS2	protein_coding	ENSG00000012174	0.377104	5.35989	6.64264e-11	6.71497e-10
PRICKLE3	protein_coding	ENSG00000012211	-0.27587	2.91947	0.000801718	0.00286382
LTF	protein_coding	ENSG00000012223	2.71381	-3.28304	0.000876515	0.00310414
EXTL3	protein_coding	ENSG00000012232	0.0760291	6.12141	0.157037	0.267233
ELOVL5	protein_coding	ENSG00000012660	0.254508	7.25648	0.000624551	0.00229284
CALCOCO1	protein_coding	ENSG00000012822	0.431283	5.83164	1.15581e-15	1.72492e-14
UBR7	protein_coding	ENSG00000012963	-0.192431	4.79386	0.00269223	0.00842039
MAP4K5	protein_coding	ENSG00000012983	0.0108786	7.09272	0.853688	0.923868
EHD3	protein_coding	ENSG00000013016	0.60243	5.79743	2.95311e-27	8.13951e-26
PSMC4	protein_coding	ENSG00000013275	0.0328547	6.26679	0.536443	0.673034
MAN2B2	protein_coding	ENSG00000013288	0.453139	7.06216	7.51175e-17	1.20461e-15
SLC7A14	protein_coding	ENSG00000013293	3.09407	3.70181	1.74538e-290	1.81108e-287
CLDN11	protein_coding	ENSG00000013297	0.535103	6.36678	8.16543e-18	1.40525e-16
SLC25A39	protein_coding	ENSG00000013306	-0.152663	5.64875	0.0071901	0.0200116
MVP	protein_coding	ENSG00000013364	-0.147058	7.72992	0.00467326	0.0137029
NUB1	protein_coding	ENSG00000013374	0.0359041	5.80874	0.558111	0.692779
PGM3	protein_coding	ENSG00000013375	0.0638174	7.14742	0.250408	0.384673
RWDD2A	protein_coding	ENSG00000013392	0.482906	3.0523	1.93581e-09	1.67308e-08
CLK1	protein_coding	ENSG00000013441	0.401878	5.49921	4.65573e-11	4.77483e-10
POLR3B	protein_coding	ENSG00000013503	-0.0765189	4.27306	0.208683	0.33447
ANGEL1	protein_coding	ENSG00000013523	0.131446	3.25625	0.0692699	0.137515
RNF14	protein_coding	ENSG00000013561	0.253486	5.28004	2.45996e-05	0.000120337
DNASE1L1	protein_coding	ENSG00000013563	-0.326138	4.62904	6.61331e-08	4.77914e-07
DDX11	protein_coding	ENSG00000013573	-0.848872	3.1	3.44194e-20	6.73872e-19
HEBP1	protein_coding	ENSG00000013583	-0.0468962	5.79426	0.390651	0.535437
GPRC5A	protein_coding	ENSG00000013588	-0.219917	6.65635	3.97594e-05	0.000187629
MAMLD1	protein_coding	ENSG00000013619	1.73251	5.46457	6.20254e-172	2.60507e-169
TACC3	protein_coding	ENSG00000013810	-1.02337	5.18378	2.03475e-64	1.84067e-62
UFL1	protein_coding	ENSG00000014123	0.0270941	5.26125	0.690895	0.802647
POLA2	protein_coding	ENSG00000014138	-0.932003	-0.0643773	9.34336e-08	6.62434e-07
ZC3H3	protein_coding	ENSG00000014164	-0.106935	4.38079	0.173385	0.28873
CAPN1	protein_coding	ENSG00000014216	-0.164842	7.09767	0.00128731	0.00435688
ACPP	protein_coding	ENSG00000014257	0.539827	2.32389	5.08956e-08	3.75334e-07
MDH1	protein_coding	ENSG00000014641	-0.0755715	5.60469	0.176567	0.293309
SLC30A9	protein_coding	ENSG00000014824	-0.0157216	6.45088	0.796733	0.883944
MTMR11	protein_coding	ENSG00000014914	-0.00808517	2.47255	0.934245	0.978978
COX15	protein_coding	ENSG00000014919	-0.149313	3.11248	0.0438978	0.0943877
CCDC88C	protein_coding	ENSG00000015133	-0.487523	-2.94453	0.573303	0.705333
YAF2	protein_coding	ENSG00000015153	0.133928	3.68508	0.0568276	0.116698
ZMYND11	protein_coding	ENSG00000015171	0.126488	6.92871	0.0323711	0.0731897
WAS	protein_coding	ENSG00000015285	-0.433952	-2.90426	0.390541	0.535371
BID	protein_coding	ENSG00000015475	-0.126645	5.4953	0.024923	0.0585719
MATR3	protein_coding	ENSG00000015479	0.127157	0.407399	0.457742	0.601457
NPC1L1	protein_coding	ENSG00000015520	2.17239	-1.72083	1.22425e-09	1.08358e-08
XYLT2	protein_coding	ENSG00000015532	-0.166881	5.8475	0.00150577	0.00500505
RGPD5	protein_coding	ENSG00000015568	0.0159374	0.873867	0.942842	0.984884
NUDCD3	protein_coding	ENSG00000015676	0.115991	5.88936	0.0295084	0.0676625
GLT8D1	protein_coding	ENSG00000016864	0.174607	5.63062	0.00548923	0.0157807
ATP2C1	protein_coding	ENSG00000017260	0.0680398	6.77964	0.229622	0.360528
IGF1	protein_coding	ENSG00000017427	-0.728603	-0.820261	0.103443	0.191086
SLC38A5	protein_coding	ENSG00000017483	-0.379537	3.18439	3.09843e-06	1.75237e-05
RALBP1	protein_coding	ENSG00000017797	0.0569123	6.89437	0.298944	0.438643
RUFY3	protein_coding	ENSG00000018189	0.161654	4.65175	0.00975541	0.0261012
CNTN1	protein_coding	ENSG00000018236	-1.68844	-1.63384	0.0111424	0.029323
WWTR1	protein_coding	ENSG00000018408	0.516367	7.29002	1.3564e-21	2.86321e-20
AGPS	protein_coding	ENSG00000018510	-0.161053	5.9376	0.00571531	0.0163613
CXorf56	protein_coding	ENSG00000018610	-0.202634	3.71517	0.00299063	0.00923902
ATP1A2	protein_coding	ENSG00000018625	1.46404	4.42378	4.93948e-109	1.00152e-106
TTC27	protein_coding	ENSG00000018699	-0.256916	4.12145	0.000184397	0.000759813
ZNF582	protein_coding	ENSG00000018869	0.018475	1.08948	0.893329	0.950455
PHLDB1	protein_coding	ENSG00000019144	0.0787778	7.81564	0.127799	0.226729
PRDM11	protein_coding	ENSG00000019485	0.523976	2.61659	1.084e-09	9.67209e-09
SNAI2	protein_coding	ENSG00000019549	-0.296317	5.70479	2.04253e-07	1.38047e-06
CD74	protein_coding	ENSG00000019582	-0.121058	-1.50464	0.717204	0.823587
HGF	protein_coding	ENSG00000019991	-0.126588	8.70872	0.0378685	0.0833334
ZRANB1	protein_coding	ENSG00000019995	0.24254	6.20312	1.00375e-05	5.2169e-05
NCDN	protein_coding	ENSG00000020129	0.132422	5.41134	0.0452912	0.0968793
ADGRA2	protein_coding	ENSG00000020181	0.0572914	8.06048	0.276575	0.414335
ZFP64	protein_coding	ENSG00000020256	0.131756	3.85672	0.044524	0.0955362
MNAT1	protein_coding	ENSG00000020426	-0.292918	4.61296	8.72751e-05	0.000384787
SAMD4A	protein_coding	ENSG00000020577	0.479935	7.72977	2.69347e-20	5.3087e-19
RUNX3	protein_coding	ENSG00000020633	-0.887474	-0.166866	9.47998e-05	0.000415264
MRE11	protein_coding	ENSG00000020922	-0.133686	4.09378	0.0378194	0.0832461
PLEKHB1	protein_coding	ENSG00000021300	0.729869	-1.57052	0.0139766	0.0356488
SERPINB1	protein_coding	ENSG00000021355	-0.273525	4.60204	1.29036e-05	6.57288e-05
SPAST	protein_coding	ENSG00000021574	0.231351	3.97697	0.00122401	0.00416905
NRXN3	protein_coding	ENSG00000021645	1.97727	2.29309	2.50109e-49	1.51612e-47
OSBPL5	protein_coding	ENSG00000021762	-0.25932	5.30447	3.23043e-06	1.82118e-05
AQR	protein_coding	ENSG00000021776	-0.163257	5.77532	0.00695488	0.019409
CPS1	protein_coding	ENSG00000021826	0.0490839	2.6584	0.570341	0.702914
FHL1	protein_coding	ENSG00000022267	0.0071091	6.82287	0.896108	0.952462
RTF2	protein_coding	ENSG00000022277	-0.199289	6.01743	0.00155753	0.0051654
SLC45A4	protein_coding	ENSG00000022567	0.270337	3.67496	0.000141359	0.000597549
RNF10	protein_coding	ENSG00000022840	0.0997009	7.1724	0.0584681	0.119469
ZNF839	protein_coding	ENSG00000022976	-0.0315574	2.88692	0.708272	0.81633
ZDHHC6	protein_coding	ENSG00000023041	-0.141389	4.98687	0.020069	0.0486955
GRAMD1B	protein_coding	ENSG00000023171	-0.709538	3.10871	7.11883e-13	8.63066e-12
RNH1	protein_coding	ENSG00000023191	-0.143409	7.04145	0.00663458	0.0186123
NDUFS1	protein_coding	ENSG00000023228	-0.0573386	6.25768	0.315679	0.45704
RB1CC1	protein_coding	ENSG00000023287	0.164691	6.33361	0.013953	0.0356143
ERP44	protein_coding	ENSG00000023318	-0.0944444	6.63979	0.0933814	0.176063
ALAS1	protein_coding	ENSG00000023330	0.175673	5.58951	0.00112942	0.00388512
BIRC3	protein_coding	ENSG00000023445	0.731793	5.09198	3.78818e-18	6.64911e-17
AKAP11	protein_coding	ENSG00000023516	0.0093127	6.09298	0.863403	0.930387
GLRX2	protein_coding	ENSG00000023572	0.128247	3.75403	0.101729	0.188379
SNAPC1	protein_coding	ENSG00000023608	-0.448734	3.9669	1.67272e-07	1.145e-06
DERA	protein_coding	ENSG00000023697	0.0296178	4.34964	0.62104	0.746823
STRAP	protein_coding	ENSG00000023734	-0.126684	7.5978	0.0536383	0.111283
ABCC2	protein_coding	ENSG00000023839	0.171557	-0.580661	0.544413	0.680468
DEF6	protein_coding	ENSG00000023892	-1.07276	-0.444387	5.75819e-08	4.21121e-07
PLEKHO1	protein_coding	ENSG00000023902	-0.489009	6.54471	6.71334e-19	1.23615e-17
GCLM	protein_coding	ENSG00000023909	-0.545045	6.51711	8.56093e-19	1.56817e-17
UBR2	protein_coding	ENSG00000024048	-0.00953959	5.22484	0.868623	0.93356
EHD2	protein_coding	ENSG00000024422	-0.17822	9.00813	0.00393959	0.0117927
DEPDC1	protein_coding	ENSG00000024526	-1.09303	4.49453	9.75872e-76	1.19544e-73
CCDC28A	protein_coding	ENSG00000024862	-0.0229283	2.17302	0.809211	0.891932
HSF2	protein_coding	ENSG00000025156	-0.156114	3.1528	0.0311966	0.0709616
PHF20	protein_coding	ENSG00000025293	-0.0689609	5.45133	0.213557	0.340702
HSD17B6	protein_coding	ENSG00000025423	0.305841	2.66806	0.00219199	0.00699849
NR1H3	protein_coding	ENSG00000025434	-0.179119	2.41733	0.0520067	0.108465
TYMP	protein_coding	ENSG00000025708	-0.44543	1.07647	0.00324629	0.00994451
NCAPH2	protein_coding	ENSG00000025770	-0.469427	4.16476	1.99388e-13	2.49802e-12
TOMM34	protein_coding	ENSG00000025772	-0.490397	5.27114	6.74227e-16	1.01914e-14
SEC63	protein_coding	ENSG00000025796	0.274769	7.69457	6.16181e-07	3.89028e-06
KPNA6	protein_coding	ENSG00000025800	-0.124997	6.34316	0.0177843	0.0439499
VIM	protein_coding	ENSG00000026025	-0.159861	12.1732	0.00244257	0.00771259
RTEL1-TNFRSF6B	protein_coding	ENSG00000026036	-0.667067	-0.886916	0.0144616	0.0367107
FAS	protein_coding	ENSG00000026103	0.133228	5.59344	0.0254844	0.0596531
RNASET2	protein_coding	ENSG00000026297	0.165446	1.82636	0.121304	0.217416
CD44	protein_coding	ENSG00000026508	0.592609	11.69	1.98827e-25	5.05377e-24
KCNG1	protein_coding	ENSG00000026559	0.0842064	6.81391	0.257099	0.39192
AGPAT4	protein_coding	ENSG00000026652	0.236921	3.38484	0.00127922	0.00433532
BTN3A1	protein_coding	ENSG00000026950	0.288566	3.81592	4.24842e-05	0.000199672
MIPEP	protein_coding	ENSG00000027001	-0.0136204	3.55381	0.872606	0.936129
PRKCH	protein_coding	ENSG00000027075	-0.796524	-0.755826	0.00189877	0.00615931
IFNGR1	protein_coding	ENSG00000027697	0.223254	5.14252	0.000161715	0.000675342
B4GALT7	protein_coding	ENSG00000027847	-0.215364	4.49581	0.00035708	0.00138316
SH2D2A	protein_coding	ENSG00000027869	-1.72158	-2.63591	0.025228	0.0591784
VRK2	protein_coding	ENSG00000028116	-0.405295	4.07275	2.68002e-10	2.57352e-09
TNFRSF1B	protein_coding	ENSG00000028137	-0.380151	3.80785	3.20137e-08	2.40165e-07
VEZT	protein_coding	ENSG00000028203	0.0417086	6.0867	0.460629	0.603902
POU2F2	protein_coding	ENSG00000028277	0.564404	4.47593	4.29329e-11	4.42628e-10
BRD9	protein_coding	ENSG00000028310	-0.159068	5.40253	0.00488287	0.0142317
SNX1	protein_coding	ENSG00000028528	0.0564466	6.41484	0.281702	0.419875
TBPL1	protein_coding	ENSG00000028839	-0.16013	4.1523	0.0316133	0.0717246
ARNTL2	protein_coding	ENSG00000029153	-0.0173824	6.43582	0.76858	0.862892
BCLAF1	protein_coding	ENSG00000029363	-0.00337042	7.44659	0.955317	0.993678
SLC39A9	protein_coding	ENSG00000029364	0.340837	6.1561	4.39605e-10	4.10515e-09
ANK1	protein_coding	ENSG00000029534	-0.316742	2.26272	0.000335712	0.00131046
TFB1M	protein_coding	ENSG00000029639	-0.166461	2.47332	0.053353	0.110841
RABEP1	protein_coding	ENSG00000029725	0.0498215	6.61792	0.37462	0.519112
HMGB3	protein_coding	ENSG00000029993	-0.344348	4.74149	7.04764e-08	5.0684e-07
NUP160	protein_coding	ENSG00000030066	-0.420169	5.31055	1.73289e-13	2.19284e-12
BAK1	protein_coding	ENSG00000030110	-0.198637	4.81788	0.00125341	0.00426016
MUSK	protein_coding	ENSG00000030304	1.44593	0.143253	7.88899e-17	1.26052e-15
IKZF2	protein_coding	ENSG00000030419	0.163631	3.49662	0.0505775	0.106049
GRN	protein_coding	ENSG00000030582	0.574577	7.61931	2.58864e-24	6.25528e-23
FAM13B	protein_coding	ENSG00000031003	0.0215957	5.97806	0.698539	0.808334
ARHGAP31	protein_coding	ENSG00000031081	-0.175765	6.31435	0.00173684	0.00568525
CENPQ	protein_coding	ENSG00000031691	-0.385999	2.15872	8.68353e-05	0.000383135
SARS	protein_coding	ENSG00000031698	0.345881	7.94771	8.27461e-10	7.49687e-09
RANBP3	protein_coding	ENSG00000031823	0.0432199	5.9945	0.443999	0.588566
ARID4A	protein_coding	ENSG00000032219	0.35489	4.45292	4.76637e-07	3.05741e-06
EIPR1	protein_coding	ENSG00000032389	-0.112979	3.71165	0.110897	0.202215
PNPLA6	protein_coding	ENSG00000032444	-0.233128	5.7278	2.71215e-05	0.000131833
IFT88	protein_coding	ENSG00000032742	0.120408	3.47241	0.098138	0.183193
ALG1	protein_coding	ENSG00000033011	-0.0102404	4.60485	0.872852	0.936146
ZCCHC8	protein_coding	ENSG00000033030	-0.188068	4.44165	0.00176322	0.00576197
ABCF2	protein_coding	ENSG00000033050	-0.423616	3.66485	3.67009e-08	2.73859e-07
CHPF2	protein_coding	ENSG00000033100	-0.0156847	7.47749	0.770293	0.864145
FUT8	protein_coding	ENSG00000033170	-0.0640871	4.7471	0.302471	0.44242
UBA6	protein_coding	ENSG00000033178	-0.142759	5.94962	0.012604	0.03261
GAB2	protein_coding	ENSG00000033327	0.0874892	4.36183	0.169001	0.283166
ATP6V0A1	protein_coding	ENSG00000033627	0.0829545	4.96449	0.257815	0.392734
PIAS1	protein_coding	ENSG00000033800	0.0771073	5.14186	0.205109	0.330212
SLC4A7	protein_coding	ENSG00000033867	-0.131888	6.87681	0.0195228	0.0475434
APBA2	protein_coding	ENSG00000034053	0.122919	5.75554	0.0305703	0.0697168
MAP2K3	protein_coding	ENSG00000034152	-0.479329	7.48228	6.36316e-20	1.22406e-18
TMSB10	protein_coding	ENSG00000034510	-0.189824	10.2281	0.00469189	0.0137435
ASTE1	protein_coding	ENSG00000034533	0.120147	2.40304	0.192399	0.313555
RNF19A	protein_coding	ENSG00000034677	0.175573	5.69712	0.00527884	0.0152379
PEX3	protein_coding	ENSG00000034693	-0.319122	3.56155	3.31033e-05	0.000158465
GABARAPL2	protein_coding	ENSG00000034713	0.23832	5.22632	0.00142729	0.00476936
SH3YL1	protein_coding	ENSG00000035115	0.281735	3.9671	3.9918e-05	0.000188277
FAM136A	protein_coding	ENSG00000035141	-0.344593	4.88478	1.47934e-07	1.01976e-06
VCL	protein_coding	ENSG00000035403	-0.124576	9.82902	0.0185411	0.0455333
DEPDC1B	protein_coding	ENSG00000035499	-1.05765	1.69932	3.23452e-22	7.10546e-21
DAPK2	protein_coding	ENSG00000035664	-0.0879808	1.30467	0.510951	0.650302
NSMAF	protein_coding	ENSG00000035681	0.048615	5.63897	0.376155	0.520666
ADSS	protein_coding	ENSG00000035687	-0.0338065	5.60056	0.608047	0.736023
TIMP2	protein_coding	ENSG00000035862	0.174852	9.88636	0.00340252	0.0103412
RFC1	protein_coding	ENSG00000035928	-0.232284	5.44511	8.55162e-05	0.000378356
TBC1D23	protein_coding	ENSG00000036054	-0.0268128	5.93582	0.651237	0.770632
CUL3	protein_coding	ENSG00000036257	-0.00854142	6.75494	0.883015	0.943812
MYOM2	protein_coding	ENSG00000036448	0.0997428	-3.2841	0.899482	0.954972
CYP46A1	protein_coding	ENSG00000036530	0.408825	-0.315676	0.0331995	0.0746989
AC118549.1	protein_coding	ENSG00000036549	0.0399583	5.90004	0.484485	0.626839
USP2	protein_coding	ENSG00000036672	-0.265219	0.865455	0.115385	0.208825
TUBG2	protein_coding	ENSG00000037042	0.153338	3.14476	0.0963038	0.180493
RPL26L1	protein_coding	ENSG00000037241	-0.460916	4.60819	2.52018e-10	2.42929e-09
FLT4	protein_coding	ENSG00000037280	0.289435	-1.67584	0.463776	0.606865
NSUN2	protein_coding	ENSG00000037474	-0.270261	6.80049	4.59457e-07	2.9558e-06
FBXO42	protein_coding	ENSG00000037637	0.000438538	4.51176	0.999578	1
MFAP3	protein_coding	ENSG00000037749	0.0684117	5.04835	0.326721	0.468186
MRI1	protein_coding	ENSG00000037757	-0.279267	4.00303	5.05796e-05	0.000234549
METTL1	protein_coding	ENSG00000037897	-0.484964	3.43887	2.75823e-10	2.64574e-09
HOXC8	protein_coding	ENSG00000037965	-0.0792014	-1.05399	0.752383	0.850717
AGA	protein_coding	ENSG00000038002	0.0557702	3.37274	0.511908	0.651142
PI4K2B	protein_coding	ENSG00000038210	-0.296579	3.61097	0.00014688	0.000619402
BOD1L1	protein_coding	ENSG00000038219	0.0937358	6.36216	0.0957059	0.179678
MAT2B	protein_coding	ENSG00000038274	0.0349857	5.1934	0.55337	0.688766
EDC4	protein_coding	ENSG00000038358	-0.222917	5.48376	0.000469885	0.00177452
TRIO	protein_coding	ENSG00000038382	-0.00627576	8.77534	0.915726	0.966286
VCAN	protein_coding	ENSG00000038427	-1.55608	7.33583	4.79262e-154	1.53712e-151
CLEC16A	protein_coding	ENSG00000038532	-0.197093	5.04053	0.000446396	0.00169197
MSR1	protein_coding	ENSG00000038945	0.530253	-0.777593	0.0224313	0.0536598
MTREX	protein_coding	ENSG00000039123	-0.146032	6.25878	0.015914	0.0398819
DNAH5	protein_coding	ENSG00000039139	0.251554	4.97607	2.20336e-05	0.000108537
ZFYVE16	protein_coding	ENSG00000039319	0.0795024	5.75489	0.18007	0.298117
RIPOR1	protein_coding	ENSG00000039523	0.0623286	6.92107	0.382619	0.527832
C6	protein_coding	ENSG00000039537	0.296144	-0.855337	0.189845	0.310051
RAI14	protein_coding	ENSG00000039560	-0.120882	9.24167	0.0260969	0.0608767
PNKP	protein_coding	ENSG00000039650	-0.0428302	4.40623	0.623646	0.748935
PHLPP2	protein_coding	ENSG00000040199	-0.0997671	5.42162	0.0907533	0.172064
SPDL1	protein_coding	ENSG00000040275	-0.875788	6.37178	6.12442e-39	2.57839e-37
STAU2	protein_coding	ENSG00000040341	0.217352	4.60295	0.00029845	0.00117833
PQLC2	protein_coding	ENSG00000040487	0.261509	3.6092	0.000134595	0.000571973
CTNS	protein_coding	ENSG00000040531	0.130316	3.56956	0.0746006	0.146071
RTN4R	protein_coding	ENSG00000040608	1.11349	-1.60085	0.00427806	0.0126789
PHF23	protein_coding	ENSG00000040633	0.0308516	6.05637	0.57182	0.704217
INPP4A	protein_coding	ENSG00000040933	0.0940942	4.62285	0.104354	0.192311
RAB27B	protein_coding	ENSG00000041353	-0.477894	0.588114	0.00801873	0.0220156
PSMA4	protein_coding	ENSG00000041357	-0.0154801	6.53335	0.809067	0.891853
MYO16	protein_coding	ENSG00000041515	-0.894543	-3.21569	0.275307	0.413136
LSG1	protein_coding	ENSG00000041802	-0.24167	5.56232	2.00006e-05	9.92435e-05
PARP3	protein_coding	ENSG00000041880	-0.145217	3.28612	0.0649206	0.130329
TNC	protein_coding	ENSG00000041982	-0.717319	10.5149	5.1015e-32	1.69793e-30
THAP3	protein_coding	ENSG00000041988	-0.0865538	3.34748	0.249496	0.383706
RIPOR3	protein_coding	ENSG00000042062	-0.309265	4.22447	1.59372e-05	8.00947e-05
TDP1	protein_coding	ENSG00000042088	-0.67751	3.70889	1.25521e-21	2.65808e-20
AIFM2	protein_coding	ENSG00000042286	-0.113074	5.04326	0.0584353	0.119416
SPATA7	protein_coding	ENSG00000042317	0.626055	3.56152	7.26324e-18	1.25243e-16
MED17	protein_coding	ENSG00000042429	0.0372377	2.06308	0.765719	0.860446
RETSAT	protein_coding	ENSG00000042445	0.349768	5.28263	6.22519e-10	5.73133e-09
CAPG	protein_coding	ENSG00000042493	-0.00997275	4.62438	0.866733	0.932294
AP2S1	protein_coding	ENSG00000042753	-0.334381	5.39625	8.10172e-07	5.02158e-06
USH2A	protein_coding	ENSG00000042781	-1.88099	-3.33659	0.00362812	0.0109402
TG	protein_coding	ENSG00000042832	-0.392178	-2.67056	0.35541	0.49809
DCUN1D1	protein_coding	ENSG00000043093	0.1556	5.17933	0.018047	0.0445244
JADE2	protein_coding	ENSG00000043143	0.178717	5.11194	0.00138424	0.00464132
TRIT1	protein_coding	ENSG00000043514	-0.169808	3.21771	0.0409959	0.0889615
CUL7	protein_coding	ENSG00000044090	0.0961884	5.32513	0.0961504	0.180301
CTNNA1	protein_coding	ENSG00000044115	0.0417113	8.84437	0.425426	0.570816
PHKA2	protein_coding	ENSG00000044446	-0.263504	3.77577	0.000130903	0.000557492
CNTLN	protein_coding	ENSG00000044459	-0.152283	3.63997	0.0344201	0.0770228
HSPA5	protein_coding	ENSG00000044574	0.104286	10.3493	0.0661657	0.132466
DSG2	protein_coding	ENSG00000046604	-0.483251	0.461903	0.00496697	0.0144437
GEMIN8	protein_coding	ENSG00000046647	0.184787	2.9256	0.0163062	0.0407423
OFD1	protein_coding	ENSG00000046651	0.041539	4.25132	0.552637	0.688163
GPM6B	protein_coding	ENSG00000046653	-0.363016	-1.6577	0.32193	0.463353
WDR37	protein_coding	ENSG00000047056	0.372827	4.90394	1.19703e-10	1.17964e-09
YTHDC2	protein_coding	ENSG00000047188	0.0140882	5.16077	0.82072	0.899336
CTPS2	protein_coding	ENSG00000047230	-0.0830228	4.07084	0.180317	0.298368
ATP6V1H	protein_coding	ENSG00000047249	-0.00697905	4.76213	0.908645	0.961692
POLR2B	protein_coding	ENSG00000047315	0.0687236	6.96963	0.237192	0.369417
FAM214A	protein_coding	ENSG00000047346	0.512067	3.22206	4.75288e-12	5.33339e-11
ARAP2	protein_coding	ENSG00000047365	0	-3.98524	1	1
TPR	protein_coding	ENSG00000047410	-0.0558197	7.32569	0.315907	0.457272
KIAA0556	protein_coding	ENSG00000047578	0.182557	4.74956	0.0013563	0.00455978
DTNBP1	protein_coding	ENSG00000047579	-0.111266	2.7649	0.180926	0.299029
XK	protein_coding	ENSG00000047597	-0.621907	-2.29195	0.14029	0.244327
C12orf4	protein_coding	ENSG00000047621	-0.230472	4.55573	0.000168795	0.000701754
SCML1	protein_coding	ENSG00000047634	0.074786	4.81883	0.235876	0.367982
WWC3	protein_coding	ENSG00000047644	0.12106	6.39887	0.024582	0.0579096
ARHGAP6	protein_coding	ENSG00000047648	-0.206535	1.81243	0.0510086	0.106819
FAM184B	protein_coding	ENSG00000047662	0.0230954	-1.19378	1	1
MAP4	protein_coding	ENSG00000047849	0.175993	9.59868	0.00147902	0.00492356
GOPC	protein_coding	ENSG00000047932	0.0886815	5.76717	0.163274	0.27585
USP28	protein_coding	ENSG00000048028	-0.0503228	4.05225	0.434174	0.579512
HDAC9	protein_coding	ENSG00000048052	1.46168	1.7114	3.74408e-26	9.79905e-25
TSPAN17	protein_coding	ENSG00000048140	0.0223294	5.62773	0.715425	0.822106
NOP16	protein_coding	ENSG00000048162	-0.492975	4.99911	1.81958e-14	2.45954e-13
CC2D2A	protein_coding	ENSG00000048342	0.0441043	4.21767	0.488738	0.630796
RRM2B	protein_coding	ENSG00000048392	0.600805	6.10518	2.85574e-22	6.2969e-21
ZNF800	protein_coding	ENSG00000048405	-0.0613344	5.09982	0.311685	0.452521
SNX29	protein_coding	ENSG00000048471	0.457404	5.25403	3.97758e-16	6.1279e-15
MRPS10	protein_coding	ENSG00000048544	-0.110495	5.53846	0.0603951	0.122752
RSF1	protein_coding	ENSG00000048649	0.0603099	6.21005	0.308083	0.448805
VPS13D	protein_coding	ENSG00000048707	0.026136	5.64884	0.692245	0.80346
CELF2	protein_coding	ENSG00000048740	0.717395	4.14943	2.9543e-26	7.77819e-25
FAM120A	protein_coding	ENSG00000048828	-0.314758	7.77209	1.2052e-09	1.06833e-08
R3HDM1	protein_coding	ENSG00000048991	-0.164267	5.377	0.00608825	0.017283
COL9A2	protein_coding	ENSG00000049089	-0.0787922	0.519008	0.647153	0.767535
KITLG	protein_coding	ENSG00000049130	0.381366	6.81048	4.97933e-11	5.10078e-10
ERCC8	protein_coding	ENSG00000049167	-0.123341	3.32422	0.134452	0.236087
ADAMTS6	protein_coding	ENSG00000049192	0.255347	4.30736	0.000516324	0.00193047
H6PD	protein_coding	ENSG00000049239	0.43255	6.40138	1.46354e-15	2.16402e-14
VAMP3	protein_coding	ENSG00000049245	0.107995	7.12545	0.0548368	0.113309
PER3	protein_coding	ENSG00000049246	0.220319	2.58012	0.00992561	0.0264937
LTBP1	protein_coding	ENSG00000049323	0.168873	10.2778	0.00131641	0.00444092
RCN1	protein_coding	ENSG00000049449	0.325285	7.71203	5.28531e-09	4.36279e-08
ELN	protein_coding	ENSG00000049540	-3.68671	5.3274	0	0
RFC2	protein_coding	ENSG00000049541	-0.940279	3.78722	2.29069e-35	8.61574e-34
ARID1B	protein_coding	ENSG00000049618	0.0758181	5.67426	0.209715	0.335666
CLPTM1L	protein_coding	ENSG00000049656	-0.0865314	6.32775	0.10089	0.187309
NEDD4L	protein_coding	ENSG00000049759	0.288175	4.19646	2.72674e-06	1.55562e-05
PPP1R3F	protein_coding	ENSG00000049769	0.13478	2.72113	0.126188	0.224345
HEXB	protein_coding	ENSG00000049860	-0.0797082	7.36325	0.190108	0.310424
PTCD2	protein_coding	ENSG00000049883	-0.0483729	3.01801	0.586341	0.717023
JKAMP	protein_coding	ENSG00000050130	0.283712	5.88226	2.12192e-07	1.42974e-06
DKK3	protein_coding	ENSG00000050165	0.0188311	9.9125	0.727771	0.832061
ARHGEF5	protein_coding	ENSG00000050327	-0.0326394	-0.73993	0.914273	0.965562
NFE2L3	protein_coding	ENSG00000050344	0.602174	5.94759	1.71496e-26	4.56288e-25
MCUR1	protein_coding	ENSG00000050393	-0.252454	4.48852	3.17534e-05	0.000152507
LIMA1	protein_coding	ENSG00000050405	-0.650956	8.51413	5.17213e-31	1.63214e-29
LETMD1	protein_coding	ENSG00000050426	0.202302	3.63939	0.00354615	0.0107205
SLC4A8	protein_coding	ENSG00000050438	-0.143597	3.5343	0.061963	0.125361
LAMC3	protein_coding	ENSG00000050555	-0.677135	-2.63615	0.168486	0.282437
TNIP3	protein_coding	ENSG00000050730	0.643617	-1.13037	0.101649	0.188344
MAPK9	protein_coding	ENSG00000050748	0.0579868	5.55309	0.299258	0.438958
BCAR1	protein_coding	ENSG00000050820	-0.224027	7.58279	0.000322958	0.00126515
FAM160A2	protein_coding	ENSG00000051009	-0.00451255	3.61129	0.954587	0.993212
HERPUD1	protein_coding	ENSG00000051108	0.328621	6.07182	4.30919e-09	3.59405e-08
HOMER3	protein_coding	ENSG00000051128	-0.0300244	4.67584	0.66832	0.78448
POLQ	protein_coding	ENSG00000051341	-1.24467	3.10442	2.15022e-56	1.62093e-54
PIK3CB	protein_coding	ENSG00000051382	-0.0269687	4.48027	0.674989	0.789419
CYBA	protein_coding	ENSG00000051523	-1.89328	3.73951	2.85204e-145	8.11452e-143
THOC3	protein_coding	ENSG00000051596	-0.39982	4.1476	1.60593e-07	1.101e-06
HEBP2	protein_coding	ENSG00000051620	-0.159696	5.2439	0.00411096	0.0122454
MPHOSPH9	protein_coding	ENSG00000051825	-0.428273	3.64918	2.32696e-10	2.25413e-09
PLEKHA5	protein_coding	ENSG00000052126	-0.226588	4.40848	0.00127171	0.00431402
SIKE1	protein_coding	ENSG00000052723	0.0582714	5.15685	0.336239	0.478289
RRP12	protein_coding	ENSG00000052749	-0.441981	5.64021	5.44513e-15	7.67189e-14
FNIP2	protein_coding	ENSG00000052795	-0.0140706	5.36739	0.815678	0.896316
MSMO1	protein_coding	ENSG00000052802	3.45396	7.297	0	0
TTC17	protein_coding	ENSG00000052841	0.0659276	6.87663	0.21273	0.33972
FSTL4	protein_coding	ENSG00000053108	-0.863068	-1.36031	0.00710058	0.019778
FOXN3	protein_coding	ENSG00000053254	0.264401	6.88916	1.65621e-06	9.77435e-06
AKR7A2	protein_coding	ENSG00000053371	-0.0143579	4.66405	0.827426	0.90459
MRTO4	protein_coding	ENSG00000053372	-0.485201	5.86359	2.53108e-15	3.67476e-14
NNAT	protein_coding	ENSG00000053438	1.19452	1.16812	7.67701e-21	1.54064e-19
USE1	protein_coding	ENSG00000053501	0.260812	3.02562	0.000815575	0.00290876
NRIP2	protein_coding	ENSG00000053702	0.525986	-3.35515	0.273875	0.411473
LAMA3	protein_coding	ENSG00000053747	-1.38557	2.44582	4.31893e-44	2.22766e-42
AP5M1	protein_coding	ENSG00000053770	0.0211756	4.69769	0.72815	0.83225
ANAPC4	protein_coding	ENSG00000053900	0.00796334	3.97987	0.922045	0.971095
TRAPPC3	protein_coding	ENSG00000054116	-0.0181385	5.59295	0.747978	0.847577
THRAP3	protein_coding	ENSG00000054118	0.00807164	7.27663	0.885819	0.94576
PHPT1	protein_coding	ENSG00000054148	0.353725	5.46522	8.48421e-08	6.04937e-07
ARID4B	protein_coding	ENSG00000054267	0.262506	5.70869	0.000282251	0.00112037
OPN3	protein_coding	ENSG00000054277	0.635727	5.43419	7.44522e-26	1.93422e-24
SDCCAG8	protein_coding	ENSG00000054282	0.268177	4.53289	4.42628e-05	0.000207548
PTPRN	protein_coding	ENSG00000054356	-0.883313	3.39298	1.16446e-34	4.2705e-33
HHAT	protein_coding	ENSG00000054392	0.62865	3.17948	9.55929e-15	1.31533e-13
KIF1B	protein_coding	ENSG00000054523	0.0998413	6.60797	0.0701457	0.138828
FOXC1	protein_coding	ENSG00000054598	0.333227	4.9628	2.14514e-08	1.65314e-07
TBC1D22A	protein_coding	ENSG00000054611	0.0296106	4.74109	0.627966	0.752433
SYNE2	protein_coding	ENSG00000054654	-0.0961141	3.5073	0.261592	0.397082
PLEKHH1	protein_coding	ENSG00000054690	0.865824	-2.87769	0.0557369	0.114967
ATP9A	protein_coding	ENSG00000054793	0.197961	6.44352	0.000182273	0.000752118
CHRDL2	protein_coding	ENSG00000054938	0.145201	0.243078	0.42756	0.572873
FAM168A	protein_coding	ENSG00000054965	-0.0262873	5.87385	0.623515	0.74888
RELT	protein_coding	ENSG00000054967	-0.460151	3.86949	9.57958e-07	5.87157e-06
GALC	protein_coding	ENSG00000054983	0.233252	4.97014	0.000559956	0.00207819
NOP58	protein_coding	ENSG00000055044	-0.37115	6.2005	2.71894e-09	2.31925e-08
SZRD1	protein_coding	ENSG00000055070	-0.144307	7.96329	0.0106222	0.0281233
KCNH2	protein_coding	ENSG00000055118	0.870593	3.29598	1.7785e-29	5.33549e-28
CUL1	protein_coding	ENSG00000055130	-0.175104	6.54478	0.00427586	0.0126745
FAM114A2	protein_coding	ENSG00000055147	0.0227268	4.55583	0.748309	0.847795
CYFIP2	protein_coding	ENSG00000055163	1.24461	2.8952	6.27959e-44	3.22011e-42
TAB2	protein_coding	ENSG00000055208	-0.053398	6.45916	0.309844	0.45059
GINM1	protein_coding	ENSG00000055211	0.0931851	5.73999	0.155645	0.265351
EIF2AK2	protein_coding	ENSG00000055332	0.0564014	6.52147	0.386047	0.53115
USP36	protein_coding	ENSG00000055483	0.0172191	6.01951	0.753866	0.851575
KMT2C	protein_coding	ENSG00000055609	0.102844	5.75321	0.294077	0.433449
MCOLN3	protein_coding	ENSG00000055732	-0.4939	-2.1583	0.27321	0.410828
PUM2	protein_coding	ENSG00000055917	0.089871	6.24968	0.0907121	0.172042
MRPL43	protein_coding	ENSG00000055950	-0.104631	4.97083	0.0621283	0.125648
HPF1	protein_coding	ENSG00000056050	-0.179032	3.69553	0.0132983	0.0341757
ZFR	protein_coding	ENSG00000056097	0.0562442	7.30318	0.291425	0.430809
ZNF280C	protein_coding	ENSG00000056277	-0.246844	2.81271	0.00871075	0.0236433
TRAF1	protein_coding	ENSG00000056558	0.266076	3.99812	0.00262138	0.0082221
RC3H2	protein_coding	ENSG00000056586	0.208692	6.4991	0.000210229	0.000857839
TRAF3IP2	protein_coding	ENSG00000056972	-0.264511	3.31676	0.00117908	0.00403237
GYG2	protein_coding	ENSG00000056998	-0.0500681	4.38794	0.396347	0.540933
DCBLD2	protein_coding	ENSG00000057019	0.349953	8.58981	1.87228e-11	1.98479e-10
SOAT1	protein_coding	ENSG00000057252	-0.150843	6.05604	0.00669931	0.0187759
MSH4	protein_coding	ENSG00000057468	0.457052	-3.35516	0.39294	0.53753
F7	protein_coding	ENSG00000057593	0.0455934	-2.3553	1	1
GDI2	protein_coding	ENSG00000057608	-0.0276456	8.14156	0.606024	0.734424
PRDM1	protein_coding	ENSG00000057657	-1.08063	4.20483	2.01785e-39	8.70292e-38
ATG5	protein_coding	ENSG00000057663	-0.196003	4.5578	0.00445459	0.0131491
TMCC3	protein_coding	ENSG00000057704	-0.328046	-0.58819	0.706541	0.815152
PITHD1	protein_coding	ENSG00000057757	-0.0257387	4.99711	0.685893	0.798466
MTA3	protein_coding	ENSG00000057935	0.158941	4.24843	0.0112996	0.029679
USP13	protein_coding	ENSG00000058056	-0.231145	5.107	8.64472e-05	0.000381614
ATP11B	protein_coding	ENSG00000058063	0.182879	6.29136	0.000470828	0.0017777
LAMC2	protein_coding	ENSG00000058085	-0.383818	3.81946	0.00679671	0.0190217
CDK14	protein_coding	ENSG00000058091	0.111341	5.22669	0.0584217	0.119411
SEC61A1	protein_coding	ENSG00000058262	0.135666	9.47736	0.00925805	0.0249446
PPP1R12A	protein_coding	ENSG00000058272	-0.151099	7.10985	0.00436733	0.0129131
RASGRF1	protein_coding	ENSG00000058335	-0.378987	-0.226154	0.0571839	0.117321
CAMK2B	protein_coding	ENSG00000058404	1.4235	0.0899886	0.00219382	0.00700307
CROCC	protein_coding	ENSG00000058453	-0.0171001	3.73084	0.835654	0.911198
POLR3E	protein_coding	ENSG00000058600	-0.182386	4.77172	0.00152907	0.00507677
ATP2B4	protein_coding	ENSG00000058668	0.09658	8.81314	0.0983978	0.18354
RIOK2	protein_coding	ENSG00000058729	-0.0736121	5.31835	0.28358	0.421962
YIPF1	protein_coding	ENSG00000058799	0.0499242	4.20494	0.459425	0.602906
NDC1	protein_coding	ENSG00000058804	-0.589506	4.81376	6.28335e-23	1.44509e-21
DGKG	protein_coding	ENSG00000058866	0.447558	-0.891719	0.0772184	0.150279
FLYWCH1	protein_coding	ENSG00000059122	0.0776554	4.95615	0.177789	0.29495
UNKL	protein_coding	ENSG00000059145	0.0633106	4.51388	0.338206	0.48035
TBXAS1	protein_coding	ENSG00000059377	0.147048	4.03593	0.0642481	0.129185
PARP12	protein_coding	ENSG00000059378	-0.100165	3.4034	0.213076	0.340151
ALDH18A1	protein_coding	ENSG00000059573	-0.278018	6.89409	4.43751e-07	2.8631e-06
TARBP1	protein_coding	ENSG00000059588	0.0279225	3.32254	0.718973	0.825108
GATB	protein_coding	ENSG00000059691	-0.0773586	3.75695	0.272416	0.409879
MXD1	protein_coding	ENSG00000059728	0.714215	3.36612	6.20174e-24	1.47836e-22
CDK17	protein_coding	ENSG00000059758	-0.00344259	6.75859	0.958706	0.996147
DNAJC25	protein_coding	ENSG00000059769	0.00995201	3.86603	0.898423	0.954195
SLC2A3	protein_coding	ENSG00000059804	0.192301	6.96292	0.000309055	0.00121745
PSD	protein_coding	ENSG00000059915	0.0121357	1.23508	0.93207	0.977568
CTDP1	protein_coding	ENSG00000060069	-0.000266238	4.95409	1	1
YBX3	protein_coding	ENSG00000060138	-0.0689613	7.61587	0.203869	0.328664
STYK1	protein_coding	ENSG00000060140	-0.563087	-0.31183	0.0286366	0.0659465
WNK1	protein_coding	ENSG00000060237	0.0833357	7.38537	0.270966	0.407976
CCAR1	protein_coding	ENSG00000060339	-0.0815937	6.69198	0.154469	0.263703
OGFR	protein_coding	ENSG00000060491	0.0172784	5.82121	0.757129	0.854004
PIGV	protein_coding	ENSG00000060642	0.401384	2.71827	1.58019e-06	9.3476e-06
PTPRU	protein_coding	ENSG00000060656	0.0948234	3.11187	0.217575	0.345893
SNRNP40	protein_coding	ENSG00000060688	-0.275457	4.75461	8.94681e-06	4.69009e-05
COL11A1	protein_coding	ENSG00000060718	-0.811905	5.31505	2.16133e-40	9.65211e-39
QSER1	protein_coding	ENSG00000060749	-0.114853	5.88733	0.0764798	0.149105
MPC1	protein_coding	ENSG00000060762	0.0619177	3.04516	0.425729	0.571179
ACAA1	protein_coding	ENSG00000060971	0.0595304	4.79897	0.322859	0.464272
BCAT1	protein_coding	ENSG00000060982	0.326531	8.1417	1.65153e-09	1.4408e-08
HDAC7	protein_coding	ENSG00000061273	-0.253319	6.28398	0.000548688	0.00203937
LZTS1	protein_coding	ENSG00000061337	-0.35114	4.04357	6.4369e-08	4.66695e-07
PRDM6	protein_coding	ENSG00000061455	-0.517333	0.221139	0.00115502	0.00396084
SPAG4	protein_coding	ENSG00000061656	-0.472299	-0.784646	0.0598381	0.121859
NCKAP1	protein_coding	ENSG00000061676	-0.114211	8.01489	0.0331183	0.0745448
MRPS35	protein_coding	ENSG00000061794	-0.188812	5.27057	0.00332172	0.0101352
GUCY1B1	protein_coding	ENSG00000061918	0.22741	2.20076	0.0128495	0.0331721
SFSWAP	protein_coding	ENSG00000061936	-0.143445	5.39138	0.0114561	0.0300489
TNK2	protein_coding	ENSG00000061938	0.0843808	4.6315	0.233745	0.365603
MON2	protein_coding	ENSG00000061987	0.0206032	6.02626	0.707991	0.816059
GPBP1	protein_coding	ENSG00000062194	0.00464553	5.54249	0.932877	0.978007
DGAT2	protein_coding	ENSG00000062282	0.256037	-0.822318	0.330296	0.472195
ZNF112	protein_coding	ENSG00000062370	0.0202536	2.77691	0.877638	0.939813
CS	protein_coding	ENSG00000062485	-0.21064	7.01496	0.000187135	0.000769658
LTK	protein_coding	ENSG00000062524	0.0415589	0.642668	0.797992	0.884251
MRPS24	protein_coding	ENSG00000062582	-0.119309	0.374064	0.519308	0.657381
ELMO2	protein_coding	ENSG00000062598	0.234163	5.26503	0.000123832	0.000530063
WAPL	protein_coding	ENSG00000062650	-0.0736967	6.32878	0.188137	0.308004
VMP1	protein_coding	ENSG00000062716	-0.195193	6.86703	0.000700243	0.00253953
APPBP2	protein_coding	ENSG00000062725	0.0490475	5.74399	0.368102	0.512253
POLD1	protein_coding	ENSG00000062822	-0.795544	3.43978	1.265e-30	3.94251e-29
EIF4B	protein_coding	ENSG00000063046	0.220885	8.52799	0.000106208	0.000461116
SLC6A16	protein_coding	ENSG00000063127	0.0571073	0.48191	0.756919	0.853827
BICRA	protein_coding	ENSG00000063169	-0.125432	4.01535	0.396736	0.54132
SPHK2	protein_coding	ENSG00000063176	0.244297	3.7667	0.000778568	0.00279145
RPL18	protein_coding	ENSG00000063177	-0.0539693	7.8196	0.316504	0.457764
CA11	protein_coding	ENSG00000063180	0.718049	-0.0422013	0.000173838	0.00072089
ISOC2	protein_coding	ENSG00000063241	-0.0242619	4.70366	0.693425	0.80442
U2AF2	protein_coding	ENSG00000063244	-0.294045	7.52942	3.08082e-08	2.3185e-07
EPN1	protein_coding	ENSG00000063245	-0.0594943	7.33505	0.333638	0.475561
MED29	protein_coding	ENSG00000063322	-0.112363	5.33727	0.0509867	0.106792
AHRR	protein_coding	ENSG00000063438	0.48352	5.36524	1.56863e-16	2.4706e-15
ZNF275	protein_coding	ENSG00000063587	0.100537	5.14252	0.0846983	0.162488
MTMR1	protein_coding	ENSG00000063601	0.0538185	5.68138	0.321985	0.463393
GPC1	protein_coding	ENSG00000063660	-0.490305	8.89136	1.52134e-20	3.01533e-19
ADCK1	protein_coding	ENSG00000063761	0.120693	1.44708	0.298209	0.437856
HAGH	protein_coding	ENSG00000063854	0.614721	4.79317	1.15986e-24	2.83379e-23
RNF4	protein_coding	ENSG00000063978	0.0478544	6.45362	0.378865	0.523556
CASP8	protein_coding	ENSG00000064012	0.0577872	3.69695	0.453672	0.597623
LIMCH1	protein_coding	ENSG00000064042	0.112584	0.787553	0.460525	0.603887
INTS13	protein_coding	ENSG00000064102	-0.272618	4.9828	2.37563e-05	0.000116535
TM7SF3	protein_coding	ENSG00000064115	0.192726	5.56699	0.000569158	0.00210746
SPA17	protein_coding	ENSG00000064199	-0.0890636	3.36786	0.252769	0.387287
WISP2	protein_coding	ENSG00000064205	0.135436	-2.74052	0.835318	0.910975
ST3GAL6	protein_coding	ENSG00000064225	-0.422821	-2.35553	0.357904	0.500708
CDON	protein_coding	ENSG00000064309	0.330481	-0.463771	0.0862654	0.165117
TAF2	protein_coding	ENSG00000064313	-0.250951	5.82974	7.64386e-06	4.03948e-05
HIPK2	protein_coding	ENSG00000064393	0.682341	8.56402	1.27447e-27	3.5742e-26
TNPO3	protein_coding	ENSG00000064419	-0.104761	6.13107	0.0475238	0.100748
RFXANK	protein_coding	ENSG00000064490	-0.328692	4.47659	2.37351e-08	1.81643e-07
TMEM161A	protein_coding	ENSG00000064545	0.0309879	3.82711	0.642941	0.764354
LPAR2	protein_coding	ENSG00000064547	0.468207	1.10124	0.00455174	0.0134067
CTSA	protein_coding	ENSG00000064601	0.115041	7.02919	0.0383883	0.0843091
SUGP2	protein_coding	ENSG00000064607	0.00157185	6.26575	0.979531	1
SLC12A2	protein_coding	ENSG00000064651	-0.0938901	4.60248	0.125373	0.223347
SNX24	protein_coding	ENSG00000064652	-0.357011	4.08958	7.92074e-08	5.67283e-07
EYA2	protein_coding	ENSG00000064655	-0.210724	-0.378624	0.365533	0.509152
CNN2	protein_coding	ENSG00000064666	-0.513224	9.44243	1.43171e-17	2.40298e-16
ABCA7	protein_coding	ENSG00000064687	0.423354	1.89417	0.00781071	0.0215047
SNCAIP	protein_coding	ENSG00000064692	-0.467164	2.69602	1.40151e-06	8.35213e-06
DDX20	protein_coding	ENSG00000064703	-0.0106207	4.82207	0.86892	0.933652
BTBD1	protein_coding	ENSG00000064726	0.241698	6.91709	4.23656e-06	2.33979e-05
FAR2	protein_coding	ENSG00000064763	0.150524	1.55618	0.220517	0.349468
SBNO2	protein_coding	ENSG00000064932	-0.334401	6.37369	2.60865e-09	2.22733e-08
PMS1	protein_coding	ENSG00000064933	-0.0628429	3.95639	0.353637	0.49655
HMG20B	protein_coding	ENSG00000064961	-0.00609567	5.71957	0.91264	0.964299
CALCRL	protein_coding	ENSG00000064989	0.59021	-0.545422	0.00538476	0.0155081
TAF11	protein_coding	ENSG00000064995	-0.166986	4.241	0.01743	0.0432197
ANKS1A	protein_coding	ENSG00000064999	-0.1501	4.23765	0.0202071	0.0489837
AP3D1	protein_coding	ENSG00000065000	-0.119419	7.87677	0.020262	0.049084
ZNF76	protein_coding	ENSG00000065029	0.116597	3.26	0.144463	0.249798
SLC9A3R2	protein_coding	ENSG00000065054	-0.512671	6.29468	3.71295e-21	7.63361e-20
NTHL1	protein_coding	ENSG00000065057	-0.577656	2.78725	2.1854e-11	2.31118e-10
UHRF1BP1	protein_coding	ENSG00000065060	0.319631	4.04682	2.31006e-06	1.3343e-05
GNAI3	protein_coding	ENSG00000065135	-0.14946	6.95398	0.00691743	0.0193259
IPO5	protein_coding	ENSG00000065150	-0.313978	7.77445	3.43065e-09	2.89138e-08
OAT	protein_coding	ENSG00000065154	-0.0543417	6.63723	0.384325	0.529358
WDR3	protein_coding	ENSG00000065183	-0.374686	5.89824	5.46396e-08	4.01768e-07
PKN2	protein_coding	ENSG00000065243	-0.205038	5.82114	0.000286845	0.00113707
WDR18	protein_coding	ENSG00000065268	-0.443208	4.02633	2.97672e-10	2.83834e-09
TRAM2	protein_coding	ENSG00000065308	-0.13727	8.58641	0.0135133	0.0346272
NTN1	protein_coding	ENSG00000065320	2.98832	-0.546685	9.83889e-23	2.2251e-21
GLP2R	protein_coding	ENSG00000065325	-0.148155	-2.95783	0.903416	0.957592
MCM10	protein_coding	ENSG00000065328	-1.41314	3.26775	2.36011e-87	3.35744e-85
DGKA	protein_coding	ENSG00000065357	0.0138845	5.52084	0.805231	0.889225
ERBB3	protein_coding	ENSG00000065361	0.417014	-1.2429	0.107668	0.197347
ANKRD44	protein_coding	ENSG00000065413	0.00465242	3.22439	0.952819	0.991782
KARS	protein_coding	ENSG00000065427	-0.147211	6.86292	0.00608719	0.0172828
ADAT1	protein_coding	ENSG00000065457	-0.0835388	3.82608	0.210093	0.33618
PDIA5	protein_coding	ENSG00000065485	-0.167384	4.8257	0.00662017	0.0185748
TBC1D22B	protein_coding	ENSG00000065491	0.041077	3.54126	0.573621	0.705623
NDUFB4	protein_coding	ENSG00000065518	-0.259296	5.67476	0.000473889	0.00178773
SPEN	protein_coding	ENSG00000065526	-0.108348	6.3922	0.398183	0.542724
MYLK	protein_coding	ENSG00000065534	-0.0658104	10.1135	0.208906	0.334678
ZC3H15	protein_coding	ENSG00000065548	-0.197905	6.33613	0.0021214	0.00680761
MAP2K4	protein_coding	ENSG00000065559	-0.0483595	5.38609	0.411678	0.556944
TMEM206	protein_coding	ENSG00000065600	0.0928019	3.74294	0.226085	0.356147
SLK	protein_coding	ENSG00000065613	0.0711767	6.72104	0.228635	0.35929
CYB5R4	protein_coding	ENSG00000065615	-0.0392169	4.73438	0.53083	0.667702
COL17A1	protein_coding	ENSG00000065618	-0.918853	-2.05833	0.0475366	0.100763
GSTO2	protein_coding	ENSG00000065621	-0.562011	1.70449	0.000738276	0.00266486
SEC61A2	protein_coding	ENSG00000065665	-0.00266897	3.04181	0.985746	1
TLE2	protein_coding	ENSG00000065717	0.872129	-0.369959	7.15502e-05	0.000321812
ASB1	protein_coding	ENSG00000065802	0.214959	6.66624	0.000102914	0.000448135
FAM107B	protein_coding	ENSG00000065809	-0.386251	7.14353	2.44689e-10	2.36122e-09
ME1	protein_coding	ENSG00000065833	0.228315	6.43268	2.44796e-05	0.000119784
TBC1D1	protein_coding	ENSG00000065882	-0.454655	5.74216	1.88637e-14	2.544e-13
CDK13	protein_coding	ENSG00000065883	0.192873	6.07876	0.000226739	0.000918298
MTHFD2	protein_coding	ENSG00000065911	0.346255	7.12094	6.11408e-11	6.19486e-10
SLC9A7	protein_coding	ENSG00000065923	0.201494	5.86138	0.000387584	0.00148954
FOXJ2	protein_coding	ENSG00000065970	0.140946	5.30097	0.0135571	0.0347193
YBX1	protein_coding	ENSG00000065978	0.0168527	9.70527	0.762727	0.858378
PDE4A	protein_coding	ENSG00000065989	0.164856	4.73743	0.0230445	0.0549258
PPP2R5A	protein_coding	ENSG00000066027	0.0673092	4.91048	0.295863	0.435205
ELAVL1	protein_coding	ENSG00000066044	-0.138886	6.30165	0.0108972	0.0287408
TIE1	protein_coding	ENSG00000066056	-1.4482	-1.45797	7.1149e-05	0.000320334
DIP2B	protein_coding	ENSG00000066084	-0.142689	5.77645	0.011332	0.0297553
SMARCD1	protein_coding	ENSG00000066117	0.0787141	5.6889	0.174654	0.290624
KDM4A	protein_coding	ENSG00000066135	0.269798	4.29373	4.23872e-05	0.000199283
NFYC	protein_coding	ENSG00000066136	-0.187048	4.18216	0.00421149	0.0125048
NGEF	protein_coding	ENSG00000066248	-0.184185	-0.44517	0.694035	0.804652
ASPM	protein_coding	ENSG00000066279	-0.909191	5.17325	5.0066e-49	3.00396e-47
ELOVL1	protein_coding	ENSG00000066322	0.11265	6.65368	0.0362082	0.0801798
ZNRD1	protein_coding	ENSG00000066379	-0.444025	2.28238	1.37954e-06	8.2408e-06
ZBTB11	protein_coding	ENSG00000066422	-0.0712356	5.04139	0.269296	0.40605
ATXN3	protein_coding	ENSG00000066427	0.217489	3.2329	0.00534848	0.0154112
GOLGA5	protein_coding	ENSG00000066455	0.161109	6.06238	0.00900966	0.0243721
LRRC40	protein_coding	ENSG00000066557	-0.145215	4.40989	0.0389954	0.0854507
ISOC1	protein_coding	ENSG00000066583	-0.0103087	4.21268	0.889605	0.948023
EML1	protein_coding	ENSG00000066629	-0.122569	5.86397	0.0401447	0.0874371
TRMT11	protein_coding	ENSG00000066651	0.000438806	3.38051	1	1
THUMPD1	protein_coding	ENSG00000066654	-0.00673656	5.44675	0.914256	0.965562
MSANTD3	protein_coding	ENSG00000066697	-0.145478	5.52133	0.0224377	0.0536679
ATG2B	protein_coding	ENSG00000066739	0.0698442	5.23053	0.243592	0.376794
ARFGEF1	protein_coding	ENSG00000066777	-0.0529237	6.22492	0.317568	0.458871
ZFAT	protein_coding	ENSG00000066827	-0.013275	3.02122	0.864398	0.930947
MTFR1	protein_coding	ENSG00000066855	0.0763476	4.2346	0.228445	0.359128
STAG3	protein_coding	ENSG00000066923	-0.745356	-2.58294	0.0713696	0.140862
FECH	protein_coding	ENSG00000066926	-0.156493	4.4706	0.0177606	0.0439098
MYO9A	protein_coding	ENSG00000066933	0.0422173	4.99242	0.510203	0.649725
PFKP	protein_coding	ENSG00000067057	-0.648572	8.13181	7.51049e-28	2.14377e-26
IDI1	protein_coding	ENSG00000067064	2.53614	7.12917	2.64425e-290	2.59137e-287
SP100	protein_coding	ENSG00000067066	0.210046	5.89769	0.000337438	0.00131661
KLF6	protein_coding	ENSG00000067082	0.123619	8.29343	0.0187591	0.0459853
PLPP1	protein_coding	ENSG00000067113	0.156639	3.92778	0.0176026	0.0435804
NEO1	protein_coding	ENSG00000067141	0.565209	7.84853	1.11062e-26	2.98193e-25
TRAM1	protein_coding	ENSG00000067167	0.137194	9.73389	0.0354165	0.0788088
PHKA1	protein_coding	ENSG00000067177	-0.102373	3.21169	0.242385	0.375355
TNFRSF1A	protein_coding	ENSG00000067182	-0.106085	7.42412	0.055803	0.115077
CACNB1	protein_coding	ENSG00000067191	0.633823	2.91959	8.03196e-13	9.69109e-12
EVI5	protein_coding	ENSG00000067208	0.396439	5.7436	8.51151e-13	1.02347e-11
STOML1	protein_coding	ENSG00000067221	0.193585	3.60323	0.00631168	0.0178141
PKM	protein_coding	ENSG00000067225	-0.390946	11.0297	1.7426e-13	2.20196e-12
DHX29	protein_coding	ENSG00000067248	0.0774223	6.34898	0.199907	0.323697
DNTTIP2	protein_coding	ENSG00000067334	-0.109102	6.02246	0.117621	0.212173
METTL22	protein_coding	ENSG00000067365	-0.00314131	4.00607	0.97442	1
TP53BP1	protein_coding	ENSG00000067369	0.0494551	6.45619	0.352451	0.495171
TRO	protein_coding	ENSG00000067445	0.398578	4.73658	3.10349e-11	3.2413e-10
RRP15	protein_coding	ENSG00000067533	-0.151401	5.22187	0.0472657	0.100333
RHOA	protein_coding	ENSG00000067560	-0.193996	9.13086	0.000228563	0.000924949
DHX8	protein_coding	ENSG00000067596	-0.0576122	5.43134	0.300562	0.440431
PMS2P4	transcribed_unprocessed_pseudogene	ENSG00000067601	-0.687984	-0.292955	0.000139584	0.000591036
PRKCZ	protein_coding	ENSG00000067606	0.138926	-0.747143	0.529486	0.666581
IARS2	protein_coding	ENSG00000067704	-0.04851	6.45737	0.417142	0.562224
SYT1	protein_coding	ENSG00000067715	1.1118	3.02977	4.82457e-38	1.96548e-36
NAV3	protein_coding	ENSG00000067798	-0.127466	7.60352	0.0255084	0.0596934
IDH3G	protein_coding	ENSG00000067829	-0.114295	5.26061	0.0400155	0.0872418
ROGDI	protein_coding	ENSG00000067836	0.04935	0.939881	0.741397	0.842888
PDZD4	protein_coding	ENSG00000067840	1.24682	-1.19096	0.000321172	0.00125872
ATP2B3	protein_coding	ENSG00000067842	5.07398	-2.90154	0.00909982	0.0245633
ROCK1	protein_coding	ENSG00000067900	-0.171871	7.41965	0.0027089	0.00846352
CBFB	protein_coding	ENSG00000067955	-0.0941892	6.79631	0.101626	0.188344
PDK3	protein_coding	ENSG00000067992	0.213967	-1.01814	0.426737	0.572125
HYAL2	protein_coding	ENSG00000068001	-0.0429216	4.27819	0.493296	0.63484
HDAC4	protein_coding	ENSG00000068024	-0.528851	4.43127	5.36093e-16	8.18051e-15
RASSF1	protein_coding	ENSG00000068028	-0.245303	4.86437	4.49075e-05	0.00021018
FGFR3	protein_coding	ENSG00000068078	-0.770852	0.551646	6.75719e-05	0.000305947
IFI35	protein_coding	ENSG00000068079	0.0286437	2.93352	0.736822	0.839375
HEATR6	protein_coding	ENSG00000068097	0.208271	4.12094	0.000561275	0.00208221
COASY	protein_coding	ENSG00000068120	-0.172284	5.4258	0.00385123	0.0115596
PLEKHH3	protein_coding	ENSG00000068137	-0.228764	3.52477	0.00186117	0.00605068
MEF2A	protein_coding	ENSG00000068305	0.300167	6.68955	3.83192e-08	2.85331e-07
OTUD5	protein_coding	ENSG00000068308	0.13365	5.92799	0.0157583	0.0395558
TFE3	protein_coding	ENSG00000068323	-0.0629382	7.12702	0.259467	0.394671
TBC1D25	protein_coding	ENSG00000068354	0.0149715	3.594	0.84017	0.914332
ACSL4	protein_coding	ENSG00000068366	0.163887	7.93752	0.00704372	0.0196352
INPP5A	protein_coding	ENSG00000068383	-0.209839	4.93098	0.000588468	0.00216849
GPKOW	protein_coding	ENSG00000068394	-0.107064	4.2713	0.144378	0.249706
GRIPAP1	protein_coding	ENSG00000068400	0.117515	5.03914	0.0380884	0.0837337
FTSJ1	protein_coding	ENSG00000068438	-0.378055	5.48987	2.35732e-11	2.48204e-10
PRR11	protein_coding	ENSG00000068489	-1.09225	4.96335	1.20212e-76	1.49334e-74
REEP1	protein_coding	ENSG00000068615	1.01187	-3.50801	0.528396	0.665779
ATP11A	protein_coding	ENSG00000068650	-0.0988953	6.34256	0.0872544	0.166721
POLR1A	protein_coding	ENSG00000068654	-0.194077	6.22206	0.000568871	0.00210684
LAPTM4A	protein_coding	ENSG00000068697	0.617364	8.37347	4.8927e-27	1.3319e-25
TTC7A	protein_coding	ENSG00000068724	-0.543282	4.78763	1.1679e-19	2.22482e-18
IP6K2	protein_coding	ENSG00000068745	0.218621	5.4504	0.000163311	0.000681202
SRBD1	protein_coding	ENSG00000068784	0.107956	3.53593	0.152572	0.260816
KIF2A	protein_coding	ENSG00000068796	-0.0691453	5.50696	0.220114	0.349048
RASGRP2	protein_coding	ENSG00000068831	-0.582063	-0.983655	0.0452927	0.0968793
PSME4	protein_coding	ENSG00000068878	-0.168304	7.12016	0.00163722	0.00539622
IFT80	protein_coding	ENSG00000068885	0.259042	3.30623	0.000318438	0.00124966
SIRT2	protein_coding	ENSG00000068903	0.0466442	5.05803	0.445175	0.589523
ERLEC1	protein_coding	ENSG00000068912	0.138938	6.76194	0.0185783	0.0455929
PPP2R5B	protein_coding	ENSG00000068971	0.0991765	4.50335	0.131698	0.232338
PITX1	protein_coding	ENSG00000069011	0.547883	5.53031	3.50027e-21	7.20476e-20
MAST4	protein_coding	ENSG00000069020	0.446287	4.6792	1.09686e-09	9.78188e-09
NUP133	protein_coding	ENSG00000069248	-0.102612	5.10959	0.0902686	0.171319
NUCKS1	protein_coding	ENSG00000069275	0.0207745	8.18178	0.734369	0.837434
VPS35	protein_coding	ENSG00000069329	0.0370257	6.64542	0.516542	0.655006
DNAJA2	protein_coding	ENSG00000069345	-0.0955019	6.55001	0.121591	0.217841
BCL3	protein_coding	ENSG00000069399	-0.656126	4.43485	2.23927e-18	3.98594e-17
KCNAB2	protein_coding	ENSG00000069424	0.0225395	1.23094	0.874838	0.937554
ABCC9	protein_coding	ENSG00000069431	-0.127729	2.23778	0.194178	0.315842
GAL	protein_coding	ENSG00000069482	-1.24074	2.75207	9.03234e-30	2.73764e-28
CLEC2D	protein_coding	ENSG00000069493	0.514404	0.741886	0.000247036	0.000992647
FUNDC1	protein_coding	ENSG00000069509	-0.0440465	2.90324	0.615988	0.742672
RORA	protein_coding	ENSG00000069667	0.565488	2.57432	2.54896e-11	2.67641e-10
DRD4	protein_coding	ENSG00000069696	1.05473	-2.75224	0.0360049	0.0797998
TGFBR3	protein_coding	ENSG00000069702	-0.516362	3.86596	1.51841e-14	2.06354e-13
ATP1B3	protein_coding	ENSG00000069849	-0.56587	7.35252	5.57099e-19	1.03011e-17
NEDD4	protein_coding	ENSG00000069869	-0.140523	7.11684	0.0121765	0.0316338
PIGB	protein_coding	ENSG00000069943	-0.0643162	3.02302	0.413784	0.558894
MAPK6	protein_coding	ENSG00000069956	-0.129084	6.7247	0.0335967	0.0754081
GNB5	protein_coding	ENSG00000069966	0.269508	4.53618	6.50722e-06	3.47209e-05
RAB27A	protein_coding	ENSG00000069974	-0.654926	4.10222	3.28517e-23	7.61503e-22
HDHD5	protein_coding	ENSG00000069998	-0.370883	3.48476	9.46308e-07	5.81026e-06
UFD1	protein_coding	ENSG00000070010	0.170179	5.82848	0.0022737	0.00723059
LRP6	protein_coding	ENSG00000070018	0.310099	6.4932	1.75809e-08	1.3656e-07
PHRF1	protein_coding	ENSG00000070047	-0.0762518	6.52334	0.158452	0.269251
ELP1	protein_coding	ENSG00000070061	0.0288604	5.59066	0.608567	0.736443
NUCB2	protein_coding	ENSG00000070081	-0.0240674	7.11837	0.68649	0.798844
PFN2	protein_coding	ENSG00000070087	0.134003	7.15479	0.0152105	0.0383359
PTPN3	protein_coding	ENSG00000070159	0.0192409	-0.453927	0.957144	0.99511
SPTB	protein_coding	ENSG00000070182	-0.917593	-2.52034	0.0165701	0.0413315
SLC44A1	protein_coding	ENSG00000070214	-0.448713	4.8736	1.7711e-12	2.06765e-11
TMEM260	protein_coding	ENSG00000070269	0.335372	4.50002	1.1662e-08	9.27492e-08
SMG6	protein_coding	ENSG00000070366	0.0836779	5.84742	0.145883	0.251546
EXOC5	protein_coding	ENSG00000070367	-0.0161307	6.78121	0.776077	0.868817
CLTCL1	protein_coding	ENSG00000070371	0.246674	3.23204	0.00129769	0.00438277
FGF22	protein_coding	ENSG00000070388	1.28749	-3.44908	0.0486199	0.102578
FSTL3	protein_coding	ENSG00000070404	-0.785742	7.42625	1.10183e-48	6.50041e-47
DGCR2	protein_coding	ENSG00000070413	0.0939489	5.93459	0.0968092	0.181228
RNF126	protein_coding	ENSG00000070423	-0.236938	5.07084	8.91842e-05	0.000392615
MNT	protein_coding	ENSG00000070444	0.329938	4.41395	4.75124e-06	2.59451e-05
ZXDC	protein_coding	ENSG00000070476	0.197573	4.05433	0.00255643	0.00803839
JMJD6	protein_coding	ENSG00000070495	-0.219728	5.78397	0.000191872	0.00078749
POLB	protein_coding	ENSG00000070501	-0.427593	3.01208	0.000191151	0.000784894
WIPI1	protein_coding	ENSG00000070540	0.297017	5.77902	7.37317e-08	5.29787e-07
GBA2	protein_coding	ENSG00000070610	0.0836782	5.06281	0.170517	0.285219
NDST1	protein_coding	ENSG00000070614	-0.0226217	8.12485	0.674498	0.789106
ASNS	protein_coding	ENSG00000070669	0.766809	0.615412	8.09652e-08	5.79402e-07
AP3M2	protein_coding	ENSG00000070718	0.158711	4.47416	0.0112866	0.0296537
ST6GALNAC2	protein_coding	ENSG00000070731	0.308503	-2.1671	0.443852	0.588434
PABPC1	protein_coding	ENSG00000070756	0.169777	9.948	0.00243479	0.00769018
TESK2	protein_coding	ENSG00000070759	-0.126266	0.341006	0.389161	0.534048
CFAP20	protein_coding	ENSG00000070761	-0.157018	4.58216	0.0274003	0.0635139
CSNK2A2	protein_coding	ENSG00000070770	-0.130977	6.10573	0.0205303	0.0496239
PTPN21	protein_coding	ENSG00000070778	0.428869	6.65385	6.60116e-16	9.98666e-15
EIF2B3	protein_coding	ENSG00000070785	-0.439332	4.57345	6.05131e-11	6.13672e-10
CAMK2A	protein_coding	ENSG00000070808	-1.5882	-0.953817	3.57635e-09	3.00413e-08
TCOF1	protein_coding	ENSG00000070814	-0.485457	6.04459	3.38112e-19	6.29809e-18
CDC42	protein_coding	ENSG00000070831	-0.323236	-0.291073	0.141966	0.246605
OSBPL3	protein_coding	ENSG00000070882	-0.159064	5.53271	0.00458301	0.013483
RAD18	protein_coding	ENSG00000070950	-0.638338	3.99028	1.16037e-21	2.46912e-20
ATP2B1	protein_coding	ENSG00000070961	-0.0245297	7.17017	0.657252	0.775047
NCK2	protein_coding	ENSG00000071051	0.0714196	5.23385	0.228579	0.359242
MAP4K4	protein_coding	ENSG00000071054	0.101005	8.81433	0.0634769	0.127896
RPL31	protein_coding	ENSG00000071082	0.145809	7.16764	0.105825	0.194454
WDR1	protein_coding	ENSG00000071127	-0.273133	10.0263	6.3131e-07	3.97867e-06
SNX13	protein_coding	ENSG00000071189	0.150021	5.14717	0.0143287	0.0364101
ARHGAP10	protein_coding	ENSG00000071205	0.281834	5.51663	2.06953e-06	1.20723e-05
RPS6KA2	protein_coding	ENSG00000071242	0.476294	7.03431	1.55176e-17	2.59954e-16
ING3	protein_coding	ENSG00000071243	-0.358741	3.05234	1.78118e-05	8.90337e-05
VASH1	protein_coding	ENSG00000071246	0.423213	3.58548	6.57666e-08	4.75461e-07
LMCD1	protein_coding	ENSG00000071282	-0.217702	5.97698	0.00269749	0.00843534
BUD23	protein_coding	ENSG00000071462	-0.0829035	5.68053	0.160564	0.272131
SEL1L	protein_coding	ENSG00000071537	0.502338	7.68668	1.35694e-21	2.86321e-20
TRIP13	protein_coding	ENSG00000071539	-1.12716	3.92481	3.23176e-62	2.74078e-60
ATP6AP1	protein_coding	ENSG00000071553	0.200397	6.63736	0.000173847	0.00072089
TCF3	protein_coding	ENSG00000071564	-0.00143866	6.82104	0.98029	1
TRIB2	protein_coding	ENSG00000071575	0.0753822	4.4085	0.266151	0.402582
DAZAP1	protein_coding	ENSG00000071626	-0.326274	7.14492	7.28163e-10	6.645e-09
MBD3	protein_coding	ENSG00000071655	-0.0349727	5.18891	0.584738	0.715559
HLTF	protein_coding	ENSG00000071794	-0.0922256	5.23836	0.139312	0.242929
FAM50A	protein_coding	ENSG00000071859	-0.0832208	6.3109	0.151587	0.25951
FAM3A	protein_coding	ENSG00000071889	0.0852408	4.72019	0.169964	0.284501
CPSF1	protein_coding	ENSG00000071894	-0.212691	5.93077	0.00025558	0.00102394
CYBRD1	protein_coding	ENSG00000071967	0.76964	7.71961	4.23912e-43	2.09462e-41
PDCD2	protein_coding	ENSG00000071994	-0.134617	5.37514	0.0234139	0.0555924
SLC6A15	protein_coding	ENSG00000072041	-0.466745	0.94288	0.00160352	0.00530343
RDH11	protein_coding	ENSG00000072042	0.805837	6.18278	2.55104e-35	9.55423e-34
PRKACA	protein_coding	ENSG00000072062	-0.185912	6.42102	0.00254695	0.00801146
ADGRL1	protein_coding	ENSG00000072071	0.475964	1.13002	0.000334318	0.0013053
ACTN1	protein_coding	ENSG00000072110	-0.531053	10.6603	7.1939e-23	1.64379e-21
ZFYVE26	protein_coding	ENSG00000072121	0.0411739	4.16229	0.534584	0.671322
RPS6KA6	protein_coding	ENSG00000072133	-0.123633	3.925	0.114016	0.206831
EPN2	protein_coding	ENSG00000072134	-0.0698428	6.12667	0.192033	0.313103
PTPN18	protein_coding	ENSG00000072135	-0.218834	3.79754	0.00514162	0.0148991
LIMS2	protein_coding	ENSG00000072163	-0.340548	5.51155	5.95354e-05	0.000272497
SPEG	protein_coding	ENSG00000072195	0.152198	5.74402	0.0345922	0.077349
LNX1	protein_coding	ENSG00000072201	0.656302	-0.394578	0.000583016	0.00215115
ALDH3A2	protein_coding	ENSG00000072210	-0.000701735	2.04415	1	1
TFRC	protein_coding	ENSG00000072274	0.0751279	8.18807	0.187042	0.306778
SREBF1	protein_coding	ENSG00000072310	0.133925	5.25491	0.0673605	0.13434
TRPC5	protein_coding	ENSG00000072315	1.52845	-0.486209	2.39283e-11	2.51546e-10
AFF4	protein_coding	ENSG00000072364	0.085795	7.83528	0.134225	0.235837
UBE2D1	protein_coding	ENSG00000072401	0.239423	4.40339	0.000156017	0.000654026
MPP5	protein_coding	ENSG00000072415	-0.0719785	6.12115	0.227007	0.357281
RHOBTB1	protein_coding	ENSG00000072422	0.379539	5.08191	2.66872e-10	2.56407e-09
SMC1A	protein_coding	ENSG00000072501	-0.327635	6.99718	5.05021e-10	4.68873e-09
HSD17B10	protein_coding	ENSG00000072506	-0.271509	5.00244	1.29719e-05	6.60388e-05
MARK2	protein_coding	ENSG00000072518	-0.150707	5.27093	0.0115398	0.0302289
HMMR	protein_coding	ENSG00000072571	-1.00209	3.92535	1.2705e-52	8.65314e-51
CHFR	protein_coding	ENSG00000072609	0.00145953	4.98344	0.984862	1
TRHDE	protein_coding	ENSG00000072657	-0.283001	7.67296	1.95748e-07	1.32705e-06
P4HA2	protein_coding	ENSG00000072682	0.0241151	7.16029	0.657319	0.775074
NFATC3	protein_coding	ENSG00000072736	0.0136912	4.02268	0.830666	0.907157
TRNT1	protein_coding	ENSG00000072756	-0.117953	4.51058	0.123123	0.219916
ACADVL	protein_coding	ENSG00000072778	-0.776848	7.28151	2.96977e-33	1.03327e-31
STK10	protein_coding	ENSG00000072786	-0.161807	6.15627	0.00238264	0.00754034
FBXW11	protein_coding	ENSG00000072803	0.211088	6.40491	0.000219657	0.000892388
ACAP1	protein_coding	ENSG00000072818	-0.754147	-1.795	0.0356257	0.0791383
CRMP1	protein_coding	ENSG00000072832	1.09502	-1.61259	0.0064037	0.0180536
EVC	protein_coding	ENSG00000072840	0.381928	6.18502	1.78374e-12	2.07965e-11
DERL2	protein_coding	ENSG00000072849	0.170764	5.3157	0.00284451	0.00883081
NDE1	protein_coding	ENSG00000072864	-0.0416701	4.65517	0.469447	0.612237
MRVI1	protein_coding	ENSG00000072952	-0.184836	6.12044	0.000434253	0.00165127
TMEM38A	protein_coding	ENSG00000072954	0.295797	0.165912	0.0768848	0.149762
AP1M1	protein_coding	ENSG00000072958	-0.159851	6.10189	0.00272698	0.00851094
PVR	protein_coding	ENSG00000073008	0.306209	8.72703	4.50901e-09	3.75183e-08
XRCC1	protein_coding	ENSG00000073050	-0.276531	4.10926	0.000121832	0.000522646
SCARB1	protein_coding	ENSG00000073060	0.360814	4.94162	8.24855e-10	7.4771e-09
MCM2	protein_coding	ENSG00000073111	-1.10793	4.41958	4.41113e-67	4.32291e-65
MOV10L1	protein_coding	ENSG00000073146	-0.390434	0.450054	0.011919	0.0310746
PANX2	protein_coding	ENSG00000073150	-0.0219989	1.17032	0.905401	0.95918
SELENOO	protein_coding	ENSG00000073169	0.30688	4.04762	6.47084e-06	3.45373e-05
ALPK1	protein_coding	ENSG00000073331	0.39671	3.20891	2.31534e-06	1.33691e-05
LLGL2	protein_coding	ENSG00000073350	-0.946899	-3.16772	0.0506268	0.106139
PDE8A	protein_coding	ENSG00000073417	-0.301698	5.60417	3.56987e-07	2.33664e-06
CLCN4	protein_coding	ENSG00000073464	-0.299431	2.30313	0.00076653	0.00275445
NLE1	protein_coding	ENSG00000073536	-0.414118	4.02981	7.46938e-10	6.80578e-09
SDHA	protein_coding	ENSG00000073578	-0.396619	6.24455	1.60406e-13	2.03712e-12
SMARCE1	protein_coding	ENSG00000073584	0.511551	2.53921	9.50462e-09	7.63138e-08
GSDMB	protein_coding	ENSG00000073605	-0.00512301	2.91964	0.966068	1
KDM5A	protein_coding	ENSG00000073614	-0.00752411	5.89163	0.89991	0.955255
ADAM11	protein_coding	ENSG00000073670	0.129072	-1.21931	0.67701	0.791101
PPP2R3A	protein_coding	ENSG00000073711	-0.0959231	6.2156	0.0757203	0.14782
FERMT2	protein_coding	ENSG00000073712	-0.26685	8.65647	1.40993e-06	8.39676e-06
PTGS2	protein_coding	ENSG00000073756	-0.277688	6.60938	0.0715574	0.141194
IGF2BP2	protein_coding	ENSG00000073792	-0.123789	7.52907	0.016355	0.0408527
MAP3K13	protein_coding	ENSG00000073803	-0.258256	3.76452	0.000154038	0.000646188
ST6GAL1	protein_coding	ENSG00000073849	1.02699	-0.0540541	3.47192e-09	2.92477e-08
VDAC1P1	processed_pseudogene	ENSG00000073905	-0.119032	-2.05927	0.74493	0.845541
FRY	protein_coding	ENSG00000073910	-0.195936	4.97699	0.00102969	0.00358681
PICALM	protein_coding	ENSG00000073921	-0.274511	8.77465	3.10837e-06	1.75732e-05
NSF	protein_coding	ENSG00000073969	-0.111056	5.25596	0.0673315	0.134298
GLI2	protein_coding	ENSG00000074047	-0.441418	6.27532	1.91921e-09	1.66118e-08
CLASP1	protein_coding	ENSG00000074054	0.0298642	5.9914	0.602555	0.731677
MRPS34	protein_coding	ENSG00000074071	-0.167386	5.80017	0.0510854	0.106948
NOTCH3	protein_coding	ENSG00000074181	-1.02389	6.6234	2.66596e-64	2.39937e-62
CLNS1A	protein_coding	ENSG00000074201	0.0413719	5.65597	0.531549	0.668462
TEAD2	protein_coding	ENSG00000074219	-0.0681592	4.96087	0.267986	0.404525
EED	protein_coding	ENSG00000074266	-0.314917	3.16791	0.000104319	0.000453585
SNCB	protein_coding	ENSG00000074317	1.7639	-2.22404	0.000188295	0.000773888
TSG101	protein_coding	ENSG00000074319	0.214336	5.76575	0.000184123	0.000758861
NCBP3	protein_coding	ENSG00000074356	-0.0171368	5.77427	0.758171	0.854959
ATP2A3	protein_coding	ENSG00000074370	0.36955	0.952421	0.00618021	0.017491
CA12	protein_coding	ENSG00000074410	-0.774873	2.40231	9.38923e-19	1.71455e-17
MGLL	protein_coding	ENSG00000074416	0.230484	8.38126	3.76063e-05	0.000178279
NTN4	protein_coding	ENSG00000074527	0.53887	7.25577	1.72048e-22	3.82233e-21
BCS1L	protein_coding	ENSG00000074582	-0.310349	3.55145	0.000326481	0.00127754
NUAK1	protein_coding	ENSG00000074590	0.138284	5.13545	0.01709	0.0424723
DPP8	protein_coding	ENSG00000074603	0.140473	6.08426	0.0133278	0.0342466
SLC24A1	protein_coding	ENSG00000074621	0.501183	2.78652	9.58632e-10	8.63209e-09
ZNF532	protein_coding	ENSG00000074657	0.258536	6.16183	1.14305e-06	6.93614e-06
SCARF1	protein_coding	ENSG00000074660	-0.346639	-1.34591	0.259647	0.394877
LMAN1	protein_coding	ENSG00000074695	-0.272658	8.59588	1.05589e-05	5.46537e-05
HACD3	protein_coding	ENSG00000074696	0.144722	6.69429	0.0153758	0.0387029
IPCEF1	protein_coding	ENSG00000074706	2.24475	-1.62173	8.90186e-14	1.14955e-12
ZZEF1	protein_coding	ENSG00000074755	0.071028	5.64668	0.273135	0.410785
ENO1	protein_coding	ENSG00000074800	-0.328999	10.1658	2.52639e-09	2.16337e-08
MYDGF	protein_coding	ENSG00000074842	-0.223421	7.77485	0.000265438	0.00106055
ANO8	protein_coding	ENSG00000074855	0.133328	3.4988	0.0629314	0.126913
TUBE1	protein_coding	ENSG00000074935	-0.0229711	3.52138	0.755852	0.853295
ARHGEF10L	protein_coding	ENSG00000074964	0.129355	4.01891	0.0664718	0.132944
ACTR6	protein_coding	ENSG00000075089	0.00686519	3.63729	0.939606	0.982959
TIPIN	protein_coding	ENSG00000075131	-0.549071	2.90134	1.92293e-09	1.66359e-08
SRI	protein_coding	ENSG00000075142	-0.0658547	5.249	0.274766	0.412465
EIF4G3	protein_coding	ENSG00000075151	-0.0110339	7.52448	0.830687	0.907157
NUP37	protein_coding	ENSG00000075188	-0.364269	3.52386	7.6417e-07	4.76829e-06
SEMA3A	protein_coding	ENSG00000075213	0.1094	7.16893	0.0407343	0.0885571
GTSE1	protein_coding	ENSG00000075218	-0.9238	4.0967	3.12222e-44	1.61513e-42
SEMA3C	protein_coding	ENSG00000075223	0.131253	6.37015	0.0243878	0.0575441
TTC38	protein_coding	ENSG00000075234	-0.174331	4.1457	0.00645563	0.0181767
ACAT1	protein_coding	ENSG00000075239	-0.254973	5.38314	4.48671e-05	0.000210047
GRAMD4	protein_coding	ENSG00000075240	-0.0779467	3.66006	0.274497	0.412132
CELSR1	protein_coding	ENSG00000075275	0.059105	-0.27102	0.79783	0.884194
ZNF638	protein_coding	ENSG00000075292	-0.0592587	6.32976	0.308868	0.449614
SLC25A40	protein_coding	ENSG00000075303	-0.0740816	3.08822	0.347233	0.490055
TIMM21	protein_coding	ENSG00000075336	-0.206357	4.41231	0.00326495	0.00998678
RASAL2	protein_coding	ENSG00000075391	-0.425431	5.74551	1.67733e-13	2.12559e-12
VPS9D1	protein_coding	ENSG00000075399	0.223389	4.43659	0.00129072	0.00436628
ZNF37A	protein_coding	ENSG00000075407	-0.0718016	5.30134	0.241997	0.374952
MARK3	protein_coding	ENSG00000075413	0.0556337	6.40144	0.323191	0.464587
SLC25A3	protein_coding	ENSG00000075415	0.114497	8.33947	0.0385136	0.0845526
FNDC3B	protein_coding	ENSG00000075420	0.135993	8.28398	0.0108956	0.0287408
FOSL2	protein_coding	ENSG00000075426	-0.423771	6.44575	2.07297e-15	3.03715e-14
CACNG4	protein_coding	ENSG00000075461	0.864617	-1.94861	0.150454	0.257968
FRYL	protein_coding	ENSG00000075539	-0.0138774	5.42286	0.816508	0.896907
TMEM131	protein_coding	ENSG00000075568	0.0803627	6.99679	0.167498	0.28129
FSCN1	protein_coding	ENSG00000075618	-0.375067	8.99763	1.9642e-11	2.07974e-10
ACTB	protein_coding	ENSG00000075624	-0.61526	12.5498	6.25381e-27	1.69198e-25
MOCOS	protein_coding	ENSG00000075643	0.605462	3.31344	1.75618e-15	2.58805e-14
PLD1	protein_coding	ENSG00000075651	0.282725	3.58236	1.83825e-05	9.16007e-05
WDR62	protein_coding	ENSG00000075702	-1.10178	3.02944	6.72926e-17	1.08505e-15
DLG1	protein_coding	ENSG00000075711	0.127502	6.74052	0.0223946	0.0536014
RAB7A	protein_coding	ENSG00000075785	-0.0627354	8.23923	0.240708	0.373611
BCAP29	protein_coding	ENSG00000075790	0.00718113	5.87445	0.920146	0.969675
SEC31B	protein_coding	ENSG00000075826	0.31077	1.41454	0.110069	0.201058
SART3	protein_coding	ENSG00000075856	-0.274546	5.42445	2.03008e-06	1.18578e-05
EXOSC7	protein_coding	ENSG00000075914	-0.222366	3.4378	0.0188628	0.0461691
KIFAP3	protein_coding	ENSG00000075945	0.223034	3.96796	0.00190677	0.00618186
MKRN2	protein_coding	ENSG00000075975	-0.045276	5.38915	0.410129	0.555232
MCM6	protein_coding	ENSG00000076003	-0.778644	4.81504	2.85008e-39	1.22623e-37
REXO2	protein_coding	ENSG00000076043	-0.0381206	6.11587	0.571425	0.703906
RBM7	protein_coding	ENSG00000076053	-0.162982	4.7491	0.0349364	0.0779704
RBMS2	protein_coding	ENSG00000076067	0.148296	6.96449	0.0050386	0.0146234
BAZ2A	protein_coding	ENSG00000076108	0.120726	6.82119	0.0419421	0.0907357
PTPN23	protein_coding	ENSG00000076201	-0.0878448	5.77429	0.503432	0.643471
MLH1	protein_coding	ENSG00000076242	-0.0284986	4.89822	0.655638	0.773816
UNG	protein_coding	ENSG00000076248	-0.407998	3.8859	1.74129e-09	1.51387e-08
FMO4	protein_coding	ENSG00000076258	0.604404	-1.98575	0.0802063	0.155164
KLHL20	protein_coding	ENSG00000076321	0.0414811	5.02024	0.501725	0.641978
RGS11	protein_coding	ENSG00000076344	0.798906	0.654323	1.18488e-06	7.16777e-06
SLC46A1	protein_coding	ENSG00000076351	-0.280089	3.02836	0.000380433	0.00146461
PLXNA2	protein_coding	ENSG00000076356	-1.10081	4.93868	2.65348e-41	1.23829e-39
SPAG5	protein_coding	ENSG00000076382	-1.14339	4.26305	1.02869e-74	1.23443e-72
ANKRD13A	protein_coding	ENSG00000076513	-0.440809	7.89681	6.75907e-17	1.08886e-15
ACACB	protein_coding	ENSG00000076555	0.402723	-0.19296	0.0409461	0.0888644
TRAF4	protein_coding	ENSG00000076604	-0.0892835	5.34989	0.156794	0.266922
PAG1	protein_coding	ENSG00000076641	0.106152	4.89978	0.0799539	0.154801
GPATCH1	protein_coding	ENSG00000076650	-0.0218579	3.06531	0.785137	0.875573
ICAM3	protein_coding	ENSG00000076662	0.00994033	2.64381	0.909295	0.962149
NT5C2	protein_coding	ENSG00000076685	0.355131	7.23314	2.38573e-09	2.0479e-08
MCAM	protein_coding	ENSG00000076706	-0.520437	8.10763	3.2204e-22	7.08327e-21
GPC4	protein_coding	ENSG00000076716	0.627337	4.8743	4.05829e-28	1.16783e-26
MBNL3	protein_coding	ENSG00000076770	-0.565166	0.547712	0.00100123	0.00350291
RAP1GAP	protein_coding	ENSG00000076864	-0.739502	-1.89369	0.172624	0.287822
XAB2	protein_coding	ENSG00000076924	-0.200982	5.05272	0.000583722	0.00215294
ARHGEF1	protein_coding	ENSG00000076928	-0.0538035	5.93827	0.400977	0.54569
STXBP2	protein_coding	ENSG00000076944	-1.57343	-1.2112	6.98233e-10	6.38177e-09
MAP2K7	protein_coding	ENSG00000076984	0.0979159	4.93126	0.100841	0.187266
DGKD	protein_coding	ENSG00000077044	-0.309211	4.79688	9.7364e-07	5.95941e-06
CTTNBP2	protein_coding	ENSG00000077063	0.504076	2.79705	1.48322e-10	1.45275e-09
TOP2B	protein_coding	ENSG00000077097	0.0372393	7.41179	0.523738	0.66167
TM9SF3	protein_coding	ENSG00000077147	0.132214	8.43303	0.0207542	0.0500964
NFKB2	protein_coding	ENSG00000077150	0.271708	5.96613	6.46919e-07	4.07123e-06
UBE2T	protein_coding	ENSG00000077152	-1.00421	2.78116	4.7666e-31	1.50686e-29
PPP1R12B	protein_coding	ENSG00000077157	-0.576167	4.6156	9.16627e-23	2.08636e-21
DNAJC10	protein_coding	ENSG00000077232	0.258415	7.4936	4.62565e-06	2.53169e-05
GTF3C1	protein_coding	ENSG00000077235	-0.0909367	6.91751	0.0842723	0.161865
IL4R	protein_coding	ENSG00000077238	-0.675255	6.59925	1.24032e-31	4.05924e-30
USP33	protein_coding	ENSG00000077254	-0.0102023	5.79273	0.866876	0.932294
PAK3	protein_coding	ENSG00000077264	1.13583	-1.07215	5.75381e-06	3.1001e-05
SNRPA	protein_coding	ENSG00000077312	-0.510713	5.29361	6.6276e-20	1.27354e-18
EXOSC5	protein_coding	ENSG00000077348	-0.716315	1.78904	1.16949e-11	1.26486e-10
DYNC1I2	protein_coding	ENSG00000077380	-0.00278903	7.28496	0.966086	1
LRCH4	protein_coding	ENSG00000077454	-0.18055	3.56089	0.0302325	0.0690627
FAM76B	protein_coding	ENSG00000077458	0.170317	3.35829	0.0189268	0.0463128
SIRT6	protein_coding	ENSG00000077463	-0.122705	4.01948	0.0971163	0.181726
POLD3	protein_coding	ENSG00000077514	-0.708584	3.58879	8.80921e-25	2.16427e-23
CAPZB	protein_coding	ENSG00000077549	-0.244968	7.85004	3.62787e-06	2.02518e-05
GPR137B	protein_coding	ENSG00000077585	0.687407	4.34808	9.13079e-28	2.5895e-26
JADE1	protein_coding	ENSG00000077684	-0.206984	5.4711	0.000163417	0.000681324
SLC25A43	protein_coding	ENSG00000077713	-0.268817	4.58613	2.35208e-05	0.000115476
UBE2A	protein_coding	ENSG00000077721	0.0261851	6.47528	0.641745	0.763292
FGFR1	protein_coding	ENSG00000077782	0.0399683	8.49325	0.455962	0.599878
FBLN1	protein_coding	ENSG00000077942	0.430449	8.38759	1.68842e-12	1.97374e-11
ITGA8	protein_coding	ENSG00000077943	-1.17581	5.18092	7.04338e-63	6.09045e-61
MAP2	protein_coding	ENSG00000078018	0.170672	0.722646	0.349928	0.492872
PIAS2	protein_coding	ENSG00000078043	0.0382335	4.17324	0.556735	0.691792
AMPH	protein_coding	ENSG00000078053	-0.49058	3.56844	4.01564e-13	4.93974e-12
ARAF	protein_coding	ENSG00000078061	0.0176634	5.74922	0.808272	0.891342
MCCC1	protein_coding	ENSG00000078070	-0.073572	3.68361	0.261322	0.396774
FAP	protein_coding	ENSG00000078098	0.32703	6.49609	2.40568e-08	1.83786e-07
ACER3	protein_coding	ENSG00000078124	-0.238988	4.04241	0.000280466	0.00111479
UBE2K	protein_coding	ENSG00000078140	-0.113677	6.14413	0.0402631	0.0876732
PIK3C3	protein_coding	ENSG00000078142	0.241245	5.49783	5.41571e-05	0.000250086
N4BP2	protein_coding	ENSG00000078177	0.478537	3.22767	1.70653e-09	1.48511e-08
TIGAR	protein_coding	ENSG00000078237	0.491865	1.4017	5.31793e-05	0.000245958
TULP3	protein_coding	ENSG00000078246	0.316442	5.60412	3.83493e-09	3.21675e-08
SYNJ2	protein_coding	ENSG00000078269	-0.0516857	6.84393	0.339883	0.482073
PPP2R5C	protein_coding	ENSG00000078304	0.0472946	6.2045	0.389378	0.534222
PMS2P1	unprocessed_pseudogene	ENSG00000078319	-0.267094	2.51646	0.00293521	0.00907893
GNB1	protein_coding	ENSG00000078369	-0.00829339	9.17718	0.877851	0.93987
HOXA9	protein_coding	ENSG00000078399	-0.360422	-3.16731	0.476293	0.618554
EDN1	protein_coding	ENSG00000078401	-0.156396	4.56281	0.0393501	0.0861076
MLLT10	protein_coding	ENSG00000078403	-0.135114	4.57723	0.0235002	0.0557407
ZCWPW1	protein_coding	ENSG00000078487	1.03566	0.443006	4.81559e-10	4.48717e-09
NRDC	protein_coding	ENSG00000078618	-0.00813132	7.87915	0.886885	0.946276
VDAC3	protein_coding	ENSG00000078668	-0.111155	5.99191	0.0543373	0.112514
PCM1	protein_coding	ENSG00000078674	0.14063	6.40535	0.00756145	0.0209098
TNRC6C	protein_coding	ENSG00000078687	0.307319	4.28126	6.74446e-07	4.23691e-06
CBFA2T2	protein_coding	ENSG00000078699	0.181058	4.04608	0.00761719	0.0210376
ITCH	protein_coding	ENSG00000078747	-0.0119286	6.64569	0.844043	0.916862
TP53INP2	protein_coding	ENSG00000078804	0.196088	6.33645	0.00240474	0.00760343
SDF4	protein_coding	ENSG00000078808	0.0772384	8.27226	0.154523	0.263769
TOLLIP	protein_coding	ENSG00000078902	0.1001	5.68904	0.074672	0.146193
UBE2D4	protein_coding	ENSG00000078967	0.335348	3.37257	3.11122e-05	0.000149705
RUNX1T1	protein_coding	ENSG00000079102	0.630736	2.54664	8.79621e-16	1.31943e-14
THOC1	protein_coding	ENSG00000079134	-0.20664	4.19344	0.00559221	0.0160401
FKBP7	protein_coding	ENSG00000079150	0.190199	5.17835	0.0019545	0.00632148
OSBPL6	protein_coding	ENSG00000079156	0.331733	2.6202	0.00184664	0.00600566
SLC1A3	protein_coding	ENSG00000079215	-0.422193	-1.14861	0.203137	0.327724
XRCC5	protein_coding	ENSG00000079246	-0.275333	8.16123	6.74294e-07	4.23691e-06
LXN	protein_coding	ENSG00000079257	-0.842125	3.94825	2.03818e-27	5.66195e-26
SP140	protein_coding	ENSG00000079263	-1.5042	-1.12349	4.457e-06	2.45003e-05
MKNK1	protein_coding	ENSG00000079277	-0.0707033	4.35343	0.282933	0.421282
TNS1	protein_coding	ENSG00000079308	-0.389205	8.51191	2.5195e-12	2.90104e-11
REXO1	protein_coding	ENSG00000079313	-0.251888	5.4269	3.27981e-05	0.000157089
SAR1A	protein_coding	ENSG00000079332	0.0958273	8.00857	0.106811	0.196
CDC14A	protein_coding	ENSG00000079335	0.29388	2.32537	0.00288842	0.00894832
RAPGEF3	protein_coding	ENSG00000079337	0.156697	1.51287	0.27328	0.410898
SENP1	protein_coding	ENSG00000079387	-0.187622	4.44562	0.00604345	0.0171781
CIC	protein_coding	ENSG00000079432	0.260991	6.24324	0.000281119	0.00111713
LIPE	protein_coding	ENSG00000079435	-0.1473	1.36761	0.218772	0.347389
FDFT1	protein_coding	ENSG00000079459	2.1913	7.08336	0	0
PAFAH1B3	protein_coding	ENSG00000079462	-0.573939	2.86104	1.64856e-11	1.76353e-10
OPHN1	protein_coding	ENSG00000079482	-0.196637	2.93933	0.0183228	0.0450428
KIF22	protein_coding	ENSG00000079616	-0.877634	4.29461	2.66715e-47	1.51281e-45
CARMIL1	protein_coding	ENSG00000079691	-0.243023	2.944	0.00297447	0.00919069
PGM1	protein_coding	ENSG00000079739	-0.0887026	5.11005	0.117984	0.212741
DDX1	protein_coding	ENSG00000079785	-0.202168	6.92887	0.000282978	0.001123
DNM2	protein_coding	ENSG00000079805	-0.0516157	7.06967	0.32941	0.471119
EPB41L2	protein_coding	ENSG00000079819	0.418511	9.06434	7.72299e-14	1.00172e-12
RIMS1	protein_coding	ENSG00000079841	0.199139	-2.05065	0.661512	0.778509
MOXD1	protein_coding	ENSG00000079931	-0.196987	5.9051	0.000567152	0.00210091
STX7	protein_coding	ENSG00000079950	0.154573	5.40932	0.0386992	0.0848862
RABL2B	protein_coding	ENSG00000079974	0.178794	3.52377	0.00855657	0.0232692
KEAP1	protein_coding	ENSG00000079999	0.0339125	5.57968	0.540206	0.676264
PTPRH	protein_coding	ENSG00000080031	-0.259093	-1.05747	0.374326	0.518826
SLC35C2	protein_coding	ENSG00000080189	0.111323	4.8468	0.0572577	0.117445
CRYBG3	protein_coding	ENSG00000080200	0.0119708	4.98727	0.853619	0.923868
RFX3	protein_coding	ENSG00000080298	-0.175075	1.75954	0.0853861	0.163654
RIF1	protein_coding	ENSG00000080345	-0.258149	6.14951	9.35338e-06	4.8858e-05
RAB21	protein_coding	ENSG00000080371	0.00348333	6.05793	0.958684	0.996147
SLC4A4	protein_coding	ENSG00000080493	-0.295658	5.50443	4.8979e-06	2.66746e-05
SMARCA2	protein_coding	ENSG00000080503	0.286197	5.62186	1.84214e-07	1.25368e-06
SESN1	protein_coding	ENSG00000080546	0.553004	3.32648	8.40051e-15	1.16589e-13
MID2	protein_coding	ENSG00000080561	-0.447008	0.253102	0.00272935	0.00851659
COL5A3	protein_coding	ENSG00000080573	-1.76384	4.73803	2.42398e-151	7.50159e-149
SRCAP	protein_coding	ENSG00000080603	0.158737	2.07885	0.161397	0.273202
PUM3	protein_coding	ENSG00000080608	-0.560021	6.38939	1.83388e-18	3.29091e-17
KCNN2	protein_coding	ENSG00000080709	0.159327	0.395251	0.249707	0.383962
CNOT4	protein_coding	ENSG00000080802	0.0822897	5.06704	0.163781	0.276336
PSEN1	protein_coding	ENSG00000080815	0.274443	6.38605	5.10919e-07	3.26781e-06
CPOX	protein_coding	ENSG00000080819	0.00734645	4.12413	0.928261	0.975078
CLDND1	protein_coding	ENSG00000080822	0.078194	5.70272	0.205342	0.330465
MOK	protein_coding	ENSG00000080823	-0.313515	4.27452	3.37627e-06	1.89794e-05
HSP90AA1	protein_coding	ENSG00000080824	-0.273911	10.5093	0.000919277	0.00323932
RBL1	protein_coding	ENSG00000080839	-0.928294	3.58747	3.02936e-39	1.30019e-37
DLGAP4	protein_coding	ENSG00000080845	0.16609	7.5754	0.0330966	0.0745231
CROCCP3	transcribed_unprocessed_pseudogene	ENSG00000080947	0.217413	1.8678	0.0464128	0.0988317
NDC80	protein_coding	ENSG00000080986	-0.862861	3.39138	1.30284e-32	4.41116e-31
AP4E1	protein_coding	ENSG00000081014	0.115692	4.76354	0.0452283	0.0968237
RSBN1	protein_coding	ENSG00000081019	0.0828672	3.88311	0.261179	0.396625
MAGI3	protein_coding	ENSG00000081026	-0.179009	3.49018	0.0153283	0.0385998
CXCL2	protein_coding	ENSG00000081041	0.137376	0.598688	0.786917	0.876631
AFP	protein_coding	ENSG00000081051	0.0102777	-0.763078	1	1
COL4A4	protein_coding	ENSG00000081052	-1.19185	-1.49222	1.167e-05	6.00348e-05
TCF7	protein_coding	ENSG00000081059	-0.581623	4.0451	2.84756e-09	2.42427e-08
OSTM1	protein_coding	ENSG00000081087	0.178741	6.0057	0.00632421	0.0178437
IMPG2	protein_coding	ENSG00000081148	0.899429	-1.21757	0.00533814	0.0153864
PCNP	protein_coding	ENSG00000081154	-0.122257	6.88075	0.0231878	0.0551995
EXD2	protein_coding	ENSG00000081177	0.0644085	3.81285	0.361834	0.505125
ARG2	protein_coding	ENSG00000081181	-0.162486	1.28948	0.161334	0.273123
MEF2C	protein_coding	ENSG00000081189	0.14885	1.5902	0.225937	0.356042
PKP1	protein_coding	ENSG00000081277	-1.96498	-1.08084	0.0679382	0.135232
UBA5	protein_coding	ENSG00000081307	-0.0704132	5.61494	0.213435	0.340569
STK17B	protein_coding	ENSG00000081320	0.196096	5.81164	0.00384747	0.0115542
CDC14B	protein_coding	ENSG00000081377	-0.362427	5.29322	6.71693e-11	6.78618e-10
ZNF510	protein_coding	ENSG00000081386	0.0917237	3.34281	0.235344	0.367452
ZNF506	protein_coding	ENSG00000081665	0.0388641	3.1486	0.629815	0.753895
JMJD4	protein_coding	ENSG00000081692	-0.152339	3.98537	0.0166226	0.0414435
DUSP12	protein_coding	ENSG00000081721	-0.0320175	3.96728	0.634402	0.757264
AACS	protein_coding	ENSG00000081760	0.325035	4.91911	1.80546e-07	1.23014e-06
DELE1	protein_coding	ENSG00000081791	0.165444	5.31437	0.00287267	0.00890422
CADPS2	protein_coding	ENSG00000081803	-0.409771	-2.49951	0.340284	0.482414
PCDHB4	protein_coding	ENSG00000081818	1.33987	-2.6473	0.00275334	0.00857957
PCDHA6	protein_coding	ENSG00000081842	1.48526	-3.30086	0.0104788	0.0277755
PCDHGA2	protein_coding	ENSG00000081853	0.299303	3.96061	1.09874e-05	5.66551e-05
HSPB11	protein_coding	ENSG00000081870	-0.555504	3.71058	1.02709e-13	1.32151e-12
PHLPP1	protein_coding	ENSG00000081913	0.145052	3.61119	0.0315965	0.0716958
ATP8B1	protein_coding	ENSG00000081923	0.284199	7.49034	7.48913e-07	4.68137e-06
SMARCD3	protein_coding	ENSG00000082014	-0.117145	4.8526	0.0698895	0.138455
WDR70	protein_coding	ENSG00000082068	0.0376722	4.21565	0.564781	0.698515
MPP4	protein_coding	ENSG00000082126	0.879837	3.07169	8.26305e-29	2.42127e-27
STRADB	protein_coding	ENSG00000082146	-0.125859	4.6883	0.038178	0.0839086
BZW1	protein_coding	ENSG00000082153	-0.156866	8.31054	0.0119372	0.0311129
ME2	protein_coding	ENSG00000082212	-0.169944	5.32679	0.00281212	0.00874265
C5orf22	protein_coding	ENSG00000082213	-0.221004	4.83006	0.000133575	0.000568185
CCNT2	protein_coding	ENSG00000082258	0.0935062	5.19232	0.104429	0.192368
FAM135A	protein_coding	ENSG00000082269	0.175332	3.20799	0.0242602	0.057297
EPB41L3	protein_coding	ENSG00000082397	-0.480657	6.46086	7.5384e-15	1.0537e-13
COBLL1	protein_coding	ENSG00000082438	-0.211635	3.11415	0.00814547	0.0223179
DLG3	protein_coding	ENSG00000082458	0.241013	3.75875	0.00126501	0.00429296
KCNK2	protein_coding	ENSG00000082482	-0.697864	2.91763	2.27942e-14	3.04845e-13
SERTAD4	protein_coding	ENSG00000082497	0.229276	2.76909	0.00413236	0.0122988
TRAF5	protein_coding	ENSG00000082512	-0.120572	4.62116	0.0560402	0.115471
MRPL22	protein_coding	ENSG00000082515	-0.356838	4.03003	4.14194e-07	2.6842e-06
GEMIN5	protein_coding	ENSG00000082516	-0.390475	5.25881	7.32406e-11	7.35324e-10
NFE2L1	protein_coding	ENSG00000082641	0.356968	8.5043	5.70883e-11	5.8009e-10
GSK3B	protein_coding	ENSG00000082701	0.210414	6.52858	0.000152295	0.000640249
ITGB5	protein_coding	ENSG00000082781	0.00867844	8.10832	0.873106	0.93621
ERC1	protein_coding	ENSG00000082805	0.180947	6.79057	0.000651382	0.00238241
XPO1	protein_coding	ENSG00000082898	-0.357601	6.96263	1.21573e-11	1.31326e-10
RNF13	protein_coding	ENSG00000082996	0.306406	4.5554	5.72682e-07	3.63254e-06
PALB2	protein_coding	ENSG00000083093	-0.152391	3.6378	0.035187	0.0783815
DOP1A	protein_coding	ENSG00000083097	0.043437	3.49456	0.546751	0.68247
LYRM2	protein_coding	ENSG00000083099	0.240984	4.85396	0.000428097	0.00163172
BCKDHB	protein_coding	ENSG00000083123	-0.268859	3.52179	0.0003749	0.0014452
KAT6A	protein_coding	ENSG00000083168	0.0476649	6.1076	0.369504	0.513677
TUT7	protein_coding	ENSG00000083223	0.0661874	5.6737	0.240658	0.373566
ULK2	protein_coding	ENSG00000083290	0.281273	3.92536	1.67113e-05	8.38418e-05
TNPO1	protein_coding	ENSG00000083312	-0.0909409	8.44975	0.0863236	0.165193
PLOD1	protein_coding	ENSG00000083444	-0.10222	8.76665	0.0543807	0.112565
P2RX5	protein_coding	ENSG00000083454	-0.480123	0.373999	0.0624369	0.126118
ITGAE	protein_coding	ENSG00000083457	-0.229131	4.10263	0.00125487	0.00426347
DIS3	protein_coding	ENSG00000083520	0.0277287	6.20132	0.620918	0.746727
PIBF1	protein_coding	ENSG00000083535	0.270323	3.80627	0.00118034	0.0040359
TDRD3	protein_coding	ENSG00000083544	0.0164711	2.99929	0.843258	0.916339
NUFIP1	protein_coding	ENSG00000083635	-0.421689	3.75677	5.60447e-09	4.60899e-08
PDS5B	protein_coding	ENSG00000083642	-0.204377	5.25247	0.00104109	0.00361941
OXCT1	protein_coding	ENSG00000083720	-0.219338	5.22255	0.000279552	0.00111165
RRAGB	protein_coding	ENSG00000083750	0.371074	3.35838	2.22971e-06	1.29169e-05
CYLD	protein_coding	ENSG00000083799	0.244506	5.47627	3.07807e-05	0.00014815
SLC27A5	protein_coding	ENSG00000083807	0.0464075	-0.16835	0.854176	0.924015
ZNF324	protein_coding	ENSG00000083812	0.081881	3.06327	0.312641	0.453535
ZNF671	protein_coding	ENSG00000083814	0.0661612	2.28352	0.492723	0.634318
ZNF416	protein_coding	ENSG00000083817	0.272554	2.37661	0.00490297	0.0142838
ZNF586	protein_coding	ENSG00000083828	-0.0915166	2.44381	0.325202	0.466653
ZNF446	protein_coding	ENSG00000083838	0.189652	2.01253	0.0409404	0.0888628
ZNF264	protein_coding	ENSG00000083844	0.132416	4.13733	0.0453662	0.0969804
RPS5	protein_coding	ENSG00000083845	0.055281	7.74323	0.294227	0.433582
FAT1	protein_coding	ENSG00000083857	0.282864	10.1827	0.000273982	0.00109137
YTHDC1	protein_coding	ENSG00000083896	-0.0427559	6.05279	0.449123	0.593362
CHMP2B	protein_coding	ENSG00000083937	0.0455368	5.0063	0.527048	0.66465
SMAP2	protein_coding	ENSG00000084070	-0.203104	6.23461	0.000505126	0.00189463
PPIE	protein_coding	ENSG00000084072	-0.217434	4.22138	0.000564643	0.0020925
ZMPSTE24	protein_coding	ENSG00000084073	0.134962	6.77448	0.0165572	0.0413111
STARD7	protein_coding	ENSG00000084090	-0.1291	6.81298	0.0172175	0.0427588
NOA1	protein_coding	ENSG00000084092	0.0591072	4.23153	0.356964	0.499631
REST	protein_coding	ENSG00000084093	0.0983289	6.45248	0.0843274	0.161935
SSH1	protein_coding	ENSG00000084112	-0.0366115	7.17669	0.493478	0.635027
GSTP1	protein_coding	ENSG00000084207	0.0245371	7.89598	0.662721	0.779671
APLP2	protein_coding	ENSG00000084234	0.383784	9.38468	1.41015e-10	1.38503e-09
FAM234B	protein_coding	ENSG00000084444	-0.285093	2.7218	0.00100579	0.00351748
WBP11	protein_coding	ENSG00000084463	-0.289019	6.02601	3.70598e-08	2.76304e-07
EIF3I	protein_coding	ENSG00000084623	-0.247575	7.33764	1.58878e-06	9.39212e-06
NKAIN1	protein_coding	ENSG00000084628	1.82127	-2.763	0.00331434	0.0101168
COL16A1	protein_coding	ENSG00000084636	0.0115298	7.94964	0.846071	0.918347
TXLNA	protein_coding	ENSG00000084652	-0.0718194	6.93039	0.165501	0.278679
APOB	protein_coding	ENSG00000084674	-0.108862	-3.23316	0.894518	0.951278
NCOA1	protein_coding	ENSG00000084676	0.160909	4.95193	0.00458907	0.0134964
AGBL5	protein_coding	ENSG00000084693	-0.00986127	3.95658	0.87974	0.94126
EFR3B	protein_coding	ENSG00000084710	0.0922025	2.49482	0.56904	0.702195
KIF3C	protein_coding	ENSG00000084731	0.445138	4.92263	1.83276e-13	2.30764e-12
RAB10	protein_coding	ENSG00000084733	0.0501731	7.08014	0.358463	0.501411
GCKR	protein_coding	ENSG00000084734	0.582192	-2.4584	0.426506	0.571917
HADHA	protein_coding	ENSG00000084754	0.0340311	7.27851	0.536665	0.673179
MAPRE3	protein_coding	ENSG00000084764	-0.0795095	4.43646	0.253197	0.387674
CAD	protein_coding	ENSG00000084774	-0.461721	5.87135	5.04913e-12	5.64785e-11
CD59	protein_coding	ENSG00000085063	-0.163188	8.35866	0.00325337	0.00995999
CD82	protein_coding	ENSG00000085117	-0.0561694	5.85773	0.313033	0.453917
BCORL1	protein_coding	ENSG00000085185	0.124493	3.63987	0.0989093	0.184299
ATRX	protein_coding	ENSG00000085224	0.245316	6.84239	2.10938e-05	0.000104316
AK6	protein_coding	ENSG00000085231	-0.169229	2.74013	0.058426	0.119411
MYNN	protein_coding	ENSG00000085274	-0.120554	4.47325	0.0438325	0.0942934
MECOM	protein_coding	ENSG00000085276	-0.252691	4.18724	8.70196e-05	0.000383757
SCAMP1	protein_coding	ENSG00000085365	0.22878	5.47585	0.000716368	0.00259345
PREP	protein_coding	ENSG00000085377	-0.0501638	5.27884	0.365101	0.508679
HACE1	protein_coding	ENSG00000085382	0.32236	3.73916	1.03352e-05	5.359e-05
SEH1L	protein_coding	ENSG00000085415	-0.171815	5.37294	0.00970999	0.0259876
WDR47	protein_coding	ENSG00000085433	0.276636	5.04877	4.36681e-06	2.40645e-05
WDFY1	protein_coding	ENSG00000085449	-0.17306	6.9658	0.00198427	0.0064107
OVGP1	protein_coding	ENSG00000085465	0.710989	0.136041	0.000345936	0.00134542
SLC25A24	protein_coding	ENSG00000085491	-0.14358	6.55437	0.0182106	0.044859
MAP3K4	protein_coding	ENSG00000085511	-0.16519	4.94717	0.00566834	0.0162294
PILRA	protein_coding	ENSG00000085514	0.286749	-3.19959	0.657153	0.775015
ABCB1	protein_coding	ENSG00000085563	0.0280739	1.26335	0.865396	0.9317
ZNF213	protein_coding	ENSG00000085644	0.198574	3.45062	0.0118648	0.0309427
AKR1B1	protein_coding	ENSG00000085662	-0.691547	6.2468	9.49726e-33	3.24046e-31
CPNE3	protein_coding	ENSG00000085719	-0.0073117	6.24271	0.902269	0.956665
RRN3	protein_coding	ENSG00000085721	-0.205834	5.56341	0.00213611	0.0068486
CTTN	protein_coding	ENSG00000085733	-0.134673	8.92237	0.0157618	0.0395558
MTIF2	protein_coding	ENSG00000085760	-0.16271	4.8302	0.016463	0.0410992
DDHD2	protein_coding	ENSG00000085788	0.0434845	5.58234	0.447236	0.591441
TTC39A	protein_coding	ENSG00000085831	0.0278456	-2.94486	1	1
EPS15	protein_coding	ENSG00000085832	0.350504	5.66469	1.6754e-09	1.46018e-08
ORC1	protein_coding	ENSG00000085840	-1.26043	2.2424	2.98135e-42	1.44481e-40
MGST2	protein_coding	ENSG00000085871	-0.135175	2.51866	0.13633	0.238743
CHERP	protein_coding	ENSG00000085872	-0.13403	5.53594	0.0301881	0.068988
ATG16L1	protein_coding	ENSG00000085978	-0.0364317	4.68109	0.592502	0.722703
USP40	protein_coding	ENSG00000085982	0.396257	4.86136	6.98317e-12	7.70858e-11
POMGNT1	protein_coding	ENSG00000085998	0.183607	6.33856	0.000499276	0.00187467
RAD54L	protein_coding	ENSG00000085999	-1.18255	2.08693	2.63318e-31	8.4607e-30
MAST2	protein_coding	ENSG00000086015	0.112655	5.87217	0.0477253	0.101102
DNAJA1	protein_coding	ENSG00000086061	-0.0803215	8.19101	0.206457	0.331897
B4GALT1	protein_coding	ENSG00000086062	-0.0738401	7.45586	0.158001	0.268679
CHMP5	protein_coding	ENSG00000086065	0.194339	5.82363	0.00104134	0.00361954
NFX1	protein_coding	ENSG00000086102	0.00117685	5.3788	0.98722	1
DIMT1	protein_coding	ENSG00000086189	-0.170256	5.13123	0.00459841	0.0135193
IPO11	protein_coding	ENSG00000086200	-0.182475	4.22934	0.00477811	0.0139592
EIF2AK1	protein_coding	ENSG00000086232	0.0326307	6.70945	0.540727	0.676772
SEPHS1	protein_coding	ENSG00000086475	-0.113797	5.25186	0.0421402	0.0910859
MRPL28	protein_coding	ENSG00000086504	-0.310184	5.72523	1.16405e-07	8.10012e-07
ITPKC	protein_coding	ENSG00000086544	0.325722	4.58332	1.97503e-07	1.33741e-06
RBM22	protein_coding	ENSG00000086589	-0.120396	5.19029	0.0385784	0.0846678
TMED2	protein_coding	ENSG00000086598	0.133495	8.52205	0.0298093	0.0682714
ERO1B	protein_coding	ENSG00000086619	0.294942	2.40164	0.00164642	0.00542148
ZFAND6	protein_coding	ENSG00000086666	0.254512	5.61872	7.74303e-06	4.09066e-05
HSD17B2	protein_coding	ENSG00000086696	0.599656	2.45406	8.76583e-08	6.23254e-07
TXLNG	protein_coding	ENSG00000086712	-0.348166	4.65743	1.32571e-08	1.04539e-07
LAT2	protein_coding	ENSG00000086730	-0.177457	-0.667061	0.593363	0.723454
HUWE1	protein_coding	ENSG00000086758	0.107366	7.93284	0.0910522	0.172539
ZW10	protein_coding	ENSG00000086827	-0.289204	4.3007	2.34466e-06	1.35251e-05
ALG9	protein_coding	ENSG00000086848	0.046013	2.82489	0.596332	0.726009
NOX4	protein_coding	ENSG00000086991	-0.179198	1.92497	0.188174	0.308035
ACOX3	protein_coding	ENSG00000087008	-0.291097	4.18372	1.72698e-05	8.64226e-05
MTMR2	protein_coding	ENSG00000087053	-0.436178	6.05176	4.31433e-16	6.62357e-15
PPP1R15A	protein_coding	ENSG00000087074	0.119927	7.94258	0.0215163	0.0517164
HSD17B14	protein_coding	ENSG00000087076	0.424041	1.23242	0.00101438	0.00354471
TRIP6	protein_coding	ENSG00000087077	-0.210177	6.59923	0.000165806	0.000690142
ACHE	protein_coding	ENSG00000087085	1.36231	-1.46616	0.000116773	0.00050253
FTL	protein_coding	ENSG00000087086	-0.0792765	11.1451	0.232696	0.364414
SRRT	protein_coding	ENSG00000087087	-0.160422	7.04371	0.00262996	0.00824463
BAX	protein_coding	ENSG00000087088	-0.103915	6.23257	0.0538374	0.111663
NLK	protein_coding	ENSG00000087095	-0.0173084	5.42418	0.748431	0.847831
PIGS	protein_coding	ENSG00000087111	0.0809876	6.15365	0.16705	0.280671
ADAMTS2	protein_coding	ENSG00000087116	-0.733588	7.19783	2.0948e-38	8.67424e-37
ATXN7L3	protein_coding	ENSG00000087152	0.0172856	5.91946	0.748771	0.848155
PGS1	protein_coding	ENSG00000087157	-0.0881191	4.13714	0.172873	0.288073
PSMC5	protein_coding	ENSG00000087191	-0.0462669	6.85881	0.427609	0.572873
UIMC1	protein_coding	ENSG00000087206	-0.124127	4.65746	0.0583753	0.119349
MMP2	protein_coding	ENSG00000087245	0.496128	10.2321	1.31558e-17	2.22288e-16
LPCAT2	protein_coding	ENSG00000087253	0.0867806	4.4086	0.15118	0.258979
GNAO1	protein_coding	ENSG00000087258	1.0238	-3.39229	0.0459439	0.0979633
OGFOD1	protein_coding	ENSG00000087263	-0.0323259	6.12275	0.566382	0.699893
SH3BP2	protein_coding	ENSG00000087266	0.129937	5.04036	0.0793906	0.153896
NOP14	protein_coding	ENSG00000087269	-0.202326	6.24797	0.000279239	0.00111091
ADD1	protein_coding	ENSG00000087274	0.0498872	8.45987	0.33206	0.474026
L2HGDH	protein_coding	ENSG00000087299	-0.295408	2.1223	0.00314487	0.00967147
TXNDC16	protein_coding	ENSG00000087301	0.129875	2.32816	0.154234	0.263351
RTRAF	protein_coding	ENSG00000087302	0.00496247	6.50944	0.941234	0.983903
NID2	protein_coding	ENSG00000087303	-0.327941	9.73426	3.12271e-09	2.64321e-08
GMCL1	protein_coding	ENSG00000087338	0.0361175	4.40493	0.588065	0.718633
SF3B2	protein_coding	ENSG00000087365	-0.192788	7.79211	0.000511906	0.00191558
KLHL42	protein_coding	ENSG00000087448	0.12153	6.11022	0.0234944	0.0557363
GNAS	protein_coding	ENSG00000087460	0.200139	9.37935	0.000492113	0.00184975
DNM1L	protein_coding	ENSG00000087470	-0.0279571	6.24301	0.643185	0.764592
PTHLH	protein_coding	ENSG00000087494	2.81026	3.61547	5.54061e-137	1.45875e-134
ERGIC2	protein_coding	ENSG00000087502	-0.11055	6.29449	0.0726343	0.142967
TFAP2C	protein_coding	ENSG00000087510	-0.79071	-0.310669	7.60736e-06	4.0226e-05
AURKA	protein_coding	ENSG00000087586	-0.760499	5.31781	2.34104e-42	1.14077e-40
CASS4	protein_coding	ENSG00000087589	0.288405	5.41859	1.05324e-07	7.39619e-07
PIR	protein_coding	ENSG00000087842	-0.0570949	3.64287	0.410976	0.55625
AAMDC	protein_coding	ENSG00000087884	-0.274642	2.92039	0.00237628	0.00752155
RFX2	protein_coding	ENSG00000087903	-0.118432	2.07139	0.198009	0.321161
METTL2A	protein_coding	ENSG00000087995	0.0765817	4.11853	0.278872	0.416676
ALG6	protein_coding	ENSG00000088035	0.12611	2.45951	0.164461	0.277219
CNOT3	protein_coding	ENSG00000088038	-0.156924	5.6763	0.0209104	0.0504319
PTPN4	protein_coding	ENSG00000088179	0.371801	3.34031	5.38176e-07	3.42971e-06
DDX18	protein_coding	ENSG00000088205	-0.387797	6.29872	1.77238e-11	1.88569e-10
KHSRP	protein_coding	ENSG00000088247	-0.261063	7.46212	3.53921e-06	1.98385e-05
GNA11	protein_coding	ENSG00000088256	-0.0349503	7.04093	0.50329	0.643335
ASAP3	protein_coding	ENSG00000088280	0.25682	3.86513	4.81454e-05	0.000224027
EDEM2	protein_coding	ENSG00000088298	0.10384	4.79181	0.0766468	0.149414
DNMT3B	protein_coding	ENSG00000088305	-0.274729	2.07471	0.00273725	0.00853849
TPX2	protein_coding	ENSG00000088325	-1.04324	6.0584	5.60352e-86	7.72235e-84
FER1L4	transcribed_unitary_pseudogene	ENSG00000088340	-0.289586	0.204744	0.142951	0.247829
PDRG1	protein_coding	ENSG00000088356	-0.218032	3.57532	0.00693576	0.0193679
EPB41L1	protein_coding	ENSG00000088367	0.1592	5.59861	0.00390488	0.0116967
DOCK9	protein_coding	ENSG00000088387	0.00311389	4.53814	0.957825	0.995465
ANKRD10	protein_coding	ENSG00000088448	0.273809	5.0264	1.25367e-05	6.40081e-05
TGDS	protein_coding	ENSG00000088451	-0.406263	3.1754	6.94388e-07	4.35443e-06
DOCK3	protein_coding	ENSG00000088538	0.221209	-1.1331	0.488759	0.630796
C3orf18	protein_coding	ENSG00000088543	0.387306	3.28717	1.15163e-06	6.97859e-06
COQ9	protein_coding	ENSG00000088682	-0.0462906	4.02128	0.498664	0.639509
TMEM40	protein_coding	ENSG00000088726	-0.00270181	-3.12024	1	1
KIF9	protein_coding	ENSG00000088727	0.0124756	0.855647	0.955256	0.993673
ARHGAP28	protein_coding	ENSG00000088756	0.199301	2.65491	0.0179796	0.0443767
CRLS1	protein_coding	ENSG00000088766	-0.120933	4.47531	0.0527942	0.109913
PPP1R13B	protein_coding	ENSG00000088808	0.0259282	1.64241	0.859374	0.927299
ATRN	protein_coding	ENSG00000088812	0.377689	7.01796	5.63973e-13	6.88476e-12
SMOX	protein_coding	ENSG00000088826	0.129692	5.30732	0.0430607	0.0928596
FKBP1A	protein_coding	ENSG00000088832	-0.298778	7.27223	1.02658e-06	6.26823e-06
NSFL1C	protein_coding	ENSG00000088833	0.209422	6.52172	0.000163944	0.000683198
SLC4A11	protein_coding	ENSG00000088836	0.132124	0.864394	0.314746	0.456027
C20orf194	protein_coding	ENSG00000088854	0.265082	5.53401	1.11566e-06	6.77694e-06
ZNF343	protein_coding	ENSG00000088876	-0.125574	3.52951	0.0898192	0.170734
EBF4	protein_coding	ENSG00000088881	0.996281	1.42964	1.13576e-11	1.23216e-10
CPXM1	protein_coding	ENSG00000088882	0.0942366	0.829279	0.510688	0.65006
MAVS	protein_coding	ENSG00000088888	0.0200704	7.08648	0.711004	0.818516
LZTS3	protein_coding	ENSG00000088899	0.665596	3.90251	1.13942e-23	2.67636e-22
XRN2	protein_coding	ENSG00000088930	-0.0367463	7.01969	0.529284	0.66647
KIZ	protein_coding	ENSG00000088970	-0.0540351	3.00939	0.496562	0.637739
DYNLL1	protein_coding	ENSG00000088986	-0.216148	7.42239	0.00187847	0.00610018
SNX5	protein_coding	ENSG00000089006	-0.517937	5.68411	1.32175e-17	2.22874e-16
RPL6	protein_coding	ENSG00000089009	0.128452	9.36572	0.0472968	0.100387
MAPKAPK5	protein_coding	ENSG00000089022	-0.117465	4.86402	0.0604299	0.122809
P2RX7	protein_coding	ENSG00000089041	1.40404	1.10121	1.13652e-29	3.43292e-28
ESF1	protein_coding	ENSG00000089048	-0.407082	5.34596	1.02801e-07	7.23629e-07
RBBP9	protein_coding	ENSG00000089050	0.0425184	3.87636	0.553987	0.689331
ANAPC5	protein_coding	ENSG00000089053	-0.113184	6.05926	0.0312242	0.0710061
SLC23A2	protein_coding	ENSG00000089057	0.467617	5.72583	1.59593e-16	2.50912e-15
SLC8B1	protein_coding	ENSG00000089060	0.246947	3.63896	0.000399697	0.00153208
TMEM230	protein_coding	ENSG00000089063	0.180895	6.53337	0.000821431	0.0029261
DZANK1	protein_coding	ENSG00000089091	0.234716	0.47604	0.211279	0.33774
KDM2B	protein_coding	ENSG00000089094	-0.047144	4.89284	0.463228	0.606451
TASP1	protein_coding	ENSG00000089123	-0.0985793	2.03912	0.335474	0.477415
GCN1	protein_coding	ENSG00000089154	-0.123956	7.36127	0.0166861	0.0415679
RPLP0	protein_coding	ENSG00000089157	0.296949	10.3675	4.01659e-06	2.22947e-05
PXN	protein_coding	ENSG00000089159	-0.198356	8.3661	0.00271068	0.00846758
SIRT4	protein_coding	ENSG00000089163	0.292896	-1.40855	0.233907	0.365762
KIF16B	protein_coding	ENSG00000089177	-0.101832	2.74083	0.201865	0.326239
TRMT6	protein_coding	ENSG00000089195	-0.407864	4.59494	1.06798e-09	9.53879e-09
CHGB	protein_coding	ENSG00000089199	0.605938	-2.3636	0.164371	0.277119
PEBP1	protein_coding	ENSG00000089220	0.0549492	7.3608	0.395221	0.539814
TBX5	protein_coding	ENSG00000089225	0.0244245	4.52985	0.683265	0.796299
BRAP	protein_coding	ENSG00000089234	0.072707	4.62001	0.287005	0.426016
ERP29	protein_coding	ENSG00000089248	0.470783	7.1146	2.46735e-14	3.29478e-13
FUS	protein_coding	ENSG00000089280	-0.581357	8.43865	2.83744e-26	7.48168e-25
IGBP1	protein_coding	ENSG00000089289	0.231011	5.0463	0.000256867	0.00102864
FXYD5	protein_coding	ENSG00000089327	-0.37453	6.7286	1.43239e-11	1.53601e-10
ZNF302	protein_coding	ENSG00000089335	0.399376	4.34419	7.7511e-11	7.7599e-10
GRAMD1A	protein_coding	ENSG00000089351	-0.203399	5.6195	0.00342154	0.0103919
HEPH	protein_coding	ENSG00000089472	0.30309	4.04874	7.35034e-05	0.000329924
CDIP1	protein_coding	ENSG00000089486	-0.194434	4.19362	0.00339804	0.0103315
CMTM1	protein_coding	ENSG00000089505	0.259924	0.398543	0.100817	0.187254
GANAB	protein_coding	ENSG00000089597	-0.073015	9.29219	0.16219	0.274334
GMIP	protein_coding	ENSG00000089639	-0.152104	3.9173	0.0390897	0.085636
RBM41	protein_coding	ENSG00000089682	-0.0423849	3.80895	0.601434	0.730819
BIRC5	protein_coding	ENSG00000089685	-1.17111	4.75957	2.40433e-74	2.80877e-72
LAG3	protein_coding	ENSG00000089692	0.0926698	-2.18998	0.856909	0.925935
MLF2	protein_coding	ENSG00000089693	-0.102142	7.85051	0.0523218	0.109032
OTUB2	protein_coding	ENSG00000089723	-0.382761	1.43514	0.00113644	0.00390699
DDX24	protein_coding	ENSG00000089737	-0.0438106	7.55075	0.429423	0.574662
ZBTB25	protein_coding	ENSG00000089775	0.0392935	2.36842	0.657688	0.775198
NECAP1	protein_coding	ENSG00000089818	-0.14746	4.39728	0.0284583	0.0655871
ARHGAP4	protein_coding	ENSG00000089820	0.357728	-1.68069	0.310846	0.451712
ANKRD24	protein_coding	ENSG00000089847	1.12768	-0.80132	4.94963e-07	3.1669e-06
DHX32	protein_coding	ENSG00000089876	0.139919	4.38693	0.0289098	0.0664714
RCOR1	protein_coding	ENSG00000089902	-0.209012	5.5787	0.000135364	0.00057455
GPATCH2L	protein_coding	ENSG00000089916	0.231118	5.90337	0.000142716	0.000602734
LTBP4	protein_coding	ENSG00000090006	1.58723	8.25331	6.10548e-85	8.34889e-83
BLVRB	protein_coding	ENSG00000090013	0.200918	3.86092	0.00208361	0.00670219
SLC9A1	protein_coding	ENSG00000090020	0.210132	6.20599	0.000740302	0.00267054
SPTLC1	protein_coding	ENSG00000090054	0.0685277	6.80736	0.258591	0.39361
PAPOLA	protein_coding	ENSG00000090060	-0.048182	7.65282	0.389436	0.534229
CCNK	protein_coding	ENSG00000090061	-0.134129	6.21339	0.0417056	0.0903349
PCBP4	protein_coding	ENSG00000090097	-0.0826777	5.199	0.242712	0.375717
YPEL3	protein_coding	ENSG00000090238	0.676422	3.22299	4.1085e-21	8.4272e-20
MRPS33	protein_coding	ENSG00000090263	0.116287	3.57024	0.118366	0.213234
NDUFB2	protein_coding	ENSG00000090266	-0.207221	4.28075	0.00555143	0.0159361
NUDC	protein_coding	ENSG00000090273	-0.211313	7.39723	0.000430617	0.00163956
MAEA	protein_coding	ENSG00000090316	-0.0717187	5.96567	0.194385	0.316149
ICAM1	protein_coding	ENSG00000090339	-0.120924	7.32755	0.0223947	0.0536014
STRN4	protein_coding	ENSG00000090372	-0.0693289	6.69022	0.190787	0.311388
IRAK3	protein_coding	ENSG00000090376	-0.428146	2.12298	4.52864e-06	2.48315e-05
MUL1	protein_coding	ENSG00000090432	0.170341	4.7786	0.00400692	0.0119557
TFAP4	protein_coding	ENSG00000090447	-0.203232	2.0328	0.052299	0.108997
PDCD7	protein_coding	ENSG00000090470	-0.117263	4.75952	0.0612339	0.124166
SPG21	protein_coding	ENSG00000090487	-0.231449	5.03448	9.14959e-05	0.000401589
DNAJB11	protein_coding	ENSG00000090520	-0.018883	5.96304	0.737564	0.840045
P3H2	protein_coding	ENSG00000090530	-0.292177	8.05637	2.05873e-08	1.59002e-07
CHRD	protein_coding	ENSG00000090539	1.03166	-2.04355	0.0121526	0.0315877
RAB11FIP3	protein_coding	ENSG00000090565	0.163107	6.02629	0.00283127	0.0087938
GNPTG	protein_coding	ENSG00000090581	0.353983	4.64343	3.83417e-08	2.85379e-07
ZNF268	protein_coding	ENSG00000090612	-0.0614359	4.00869	0.381982	0.52716
GOLGA3	protein_coding	ENSG00000090615	0.0890271	7.36182	0.103415	0.191086
PABPC4	protein_coding	ENSG00000090621	0.123548	7.72524	0.0194938	0.0474894
CERS4	protein_coding	ENSG00000090661	0.550334	0.67293	0.00016815	0.000699237
MCOLN1	protein_coding	ENSG00000090674	0.116485	3.61194	0.111754	0.203547
USP48	protein_coding	ENSG00000090686	-0.0845526	6.04275	0.13317	0.234397
EFNB1	protein_coding	ENSG00000090776	0.303875	5.50408	2.47631e-07	1.65588e-06
PDPR	protein_coding	ENSG00000090857	-0.086731	5.5722	0.146353	0.252091
AARS	protein_coding	ENSG00000090861	0.0776933	6.78366	0.143818	0.248965
GLG1	protein_coding	ENSG00000090863	0.1675	8.28846	0.00103964	0.00361553
KIF4A	protein_coding	ENSG00000090889	-0.833117	4.14616	1.79577e-40	8.03996e-39
TNRC6A	protein_coding	ENSG00000090905	-0.0635059	6.77918	0.232437	0.364105
PLEKHG2	protein_coding	ENSG00000090924	-0.350409	6.02077	3.70992e-07	2.4199e-06
DLL3	protein_coding	ENSG00000090932	-0.882632	-2.72884	0.0336365	0.0754799
NAT14	protein_coding	ENSG00000090971	0.111356	4.22441	0.0965498	0.18082
PITPNM2	protein_coding	ENSG00000090975	-0.659871	4.84268	5.75538e-17	9.32276e-16
EXOC1	protein_coding	ENSG00000090989	0.139067	5.22596	0.0195518	0.0475979
RBM27	protein_coding	ENSG00000091009	-0.102733	3.5343	0.147474	0.253749
OSBPL8	protein_coding	ENSG00000091039	0.0847624	6.90985	0.16365	0.276221
DTX2	protein_coding	ENSG00000091073	-0.138247	3.39148	0.0787652	0.152935
PUS7	protein_coding	ENSG00000091127	-0.471497	4.51602	1.9374e-13	2.43244e-12
NRCAM	protein_coding	ENSG00000091129	0.285359	-0.0481638	0.250023	0.384181
LAMB1	protein_coding	ENSG00000091136	-0.34763	9.08924	2.62675e-08	1.99465e-07
SLC26A4	protein_coding	ENSG00000091137	0.000941691	-2.00852	1	1
DLD	protein_coding	ENSG00000091140	-0.0832371	5.97017	0.194868	0.316788
WDR7	protein_coding	ENSG00000091157	-0.0961487	4.04698	0.126297	0.224494
TXNL1	protein_coding	ENSG00000091164	0.125449	6.32789	0.0322772	0.0730055
ABCC6	protein_coding	ENSG00000091262	0.319062	0.856231	0.0163926	0.0409408
CMTM6	protein_coding	ENSG00000091317	0.0270003	7.1091	0.647545	0.767719
ITGA6	protein_coding	ENSG00000091409	0.0363102	6.41409	0.561962	0.696334
RAPGEF4	protein_coding	ENSG00000091428	0.23039	0.688995	0.105616	0.19413
MAP3K20	protein_coding	ENSG00000091436	0.186231	8.79532	0.00103406	0.00359994
FH	protein_coding	ENSG00000091483	-0.486832	5.42449	2.70067e-16	4.20475e-15
SEL1L3	protein_coding	ENSG00000091490	-0.390001	6.62468	1.06807e-12	1.27302e-11
CDV3	protein_coding	ENSG00000091527	-0.0971232	8.98459	0.0939454	0.1769
MYO15A	protein_coding	ENSG00000091536	1.16188	-2.03695	0.00184431	0.00600142
ALKBH5	protein_coding	ENSG00000091542	0.00143304	5.93414	0.980812	1
NLRP1	protein_coding	ENSG00000091592	0.948919	7.65607	5.20074e-69	5.30295e-67
PITPNM3	protein_coding	ENSG00000091622	-0.791426	4.77272	1.875e-32	6.3e-31
SPAG7	protein_coding	ENSG00000091640	0.172839	5.65724	0.00191102	0.00619448
ORC6	protein_coding	ENSG00000091651	-0.972135	3.34725	8.07676e-39	3.37616e-37
ZFHX4	protein_coding	ENSG00000091656	-0.335399	4.50897	0.000418777	0.00159862
ZC3HC1	protein_coding	ENSG00000091732	-0.269232	3.57897	0.000236901	0.000954746
RGS17	protein_coding	ENSG00000091844	0.4019	2.85178	2.8123e-07	1.8664e-06
ANGPT2	protein_coding	ENSG00000091879	0.642028	-1.92203	0.61494	0.741712
TMEM101	protein_coding	ENSG00000091947	-0.163915	3.65134	0.0277165	0.0641122
CD200	protein_coding	ENSG00000091972	0.737934	0.473482	2.53282e-06	1.45534e-05
CCDC80	protein_coding	ENSG00000091986	1.1245	10.987	1.7932e-90	2.75061e-88
PSME1	protein_coding	ENSG00000092010	-0.0345119	5.69915	0.646716	0.767187
PPP2R3C	protein_coding	ENSG00000092020	0.136842	4.78132	0.0545013	0.112801
HAUS4	protein_coding	ENSG00000092036	-0.315045	0.632341	0.025842	0.0603779
SLC7A8	protein_coding	ENSG00000092068	0.329864	-0.624997	0.321462	0.462867
OSGEP	protein_coding	ENSG00000092094	-0.147952	3.45093	0.039379	0.0861309
SLC22A17	protein_coding	ENSG00000092096	0.322088	4.54573	1.09475e-06	6.65681e-06
RNF31	protein_coding	ENSG00000092098	0.0348437	3.5708	0.659336	0.776595
SCFD1	protein_coding	ENSG00000092108	-0.102645	5.92717	0.0682216	0.135705
G2E3	protein_coding	ENSG00000092140	-0.352178	4.61451	2.15209e-08	1.65704e-07
HECTD1	protein_coding	ENSG00000092148	-0.0261012	7.0392	0.635201	0.757897
HNRNPC	protein_coding	ENSG00000092199	-0.234737	8.79671	0.000135437	0.000574717
SUPT16H	protein_coding	ENSG00000092201	-0.235161	7.17299	6.64747e-05	0.000301366
TOX4	protein_coding	ENSG00000092203	-0.0104789	6.27455	0.85026	0.921459
GEMIN2	protein_coding	ENSG00000092208	-0.464826	1.81917	2.6135e-06	1.49634e-05
TGM1	protein_coding	ENSG00000092295	0.00874696	0.469637	0.950744	0.990557
TINF2	protein_coding	ENSG00000092330	0.185105	4.97185	0.00145926	0.0048642
SEMA6A	protein_coding	ENSG00000092421	1.24728	2.87001	7.56124e-52	4.95837e-50
TRPM7	protein_coding	ENSG00000092439	0.180873	6.12086	0.00111221	0.00383266
TYRO3	protein_coding	ENSG00000092445	-0.123545	5.2246	0.0364823	0.0806755
WDR76	protein_coding	ENSG00000092470	-1.00981	3.75694	9.20167e-46	4.90385e-44
SNAP23	protein_coding	ENSG00000092531	0.138506	6.36388	0.0215069	0.0517081
PHGDH	protein_coding	ENSG00000092621	0.87994	7.56792	3.99176e-58	3.1576e-56
COL9A3	protein_coding	ENSG00000092758	0.14649	-0.113703	0.386005	0.531134
EZR	protein_coding	ENSG00000092820	-0.383674	7.68244	3.02905e-12	3.46065e-11
MYL6	protein_coding	ENSG00000092841	-0.293632	8.3924	1.32554e-05	6.73849e-05
AGO1	protein_coding	ENSG00000092847	-0.277188	4.99243	1.25027e-06	7.52466e-06
CLSPN	protein_coding	ENSG00000092853	-1.02102	3.90261	2.68173e-56	2.00448e-54
RFFL	protein_coding	ENSG00000092871	-0.0179244	3.48919	0.81863	0.897933
UNC13D	protein_coding	ENSG00000092929	1.50546	-3.13514	0.00901724	0.0243889
MFSD11	protein_coding	ENSG00000092931	0.351023	3.00168	1.82491e-05	9.10908e-05
DPYSL2	protein_coding	ENSG00000092964	0.685015	6.69999	6.23737e-41	2.86529e-39
TGFB2	protein_coding	ENSG00000092969	-0.239967	5.41657	2.33969e-05	0.000114932
GPATCH2	protein_coding	ENSG00000092978	0.105608	4.16582	0.146621	0.252479
NUP50	protein_coding	ENSG00000093000	-0.343546	6.43433	1.83333e-09	1.59075e-08
CDC45	protein_coding	ENSG00000093009	-1.4558	3.00623	6.94955e-85	9.43001e-83
COMT	protein_coding	ENSG00000093010	0.192034	6.2192	0.000602076	0.00221401
ADA2	protein_coding	ENSG00000093072	0.086655	1.28436	0.469811	0.612616
AC016026.1	processed_transcript	ENSG00000093100	-0.00553558	-2.41957	1	1
ECHDC1	protein_coding	ENSG00000093144	0.186703	6.00514	0.00867044	0.0235413
LRRFIP2	protein_coding	ENSG00000093167	-0.329579	6.53257	3.504e-09	2.95039e-08
SEC22C	protein_coding	ENSG00000093183	0.0139798	5.32528	0.816692	0.897039
XYLB	protein_coding	ENSG00000093217	-0.397531	1.59848	0.000283154	0.00112344
HDAC6	protein_coding	ENSG00000094631	0.384995	4.02764	3.33708e-08	2.49856e-07
CDC6	protein_coding	ENSG00000094804	-1.07911	4.2117	4.34541e-53	3.006e-51
UPRT	protein_coding	ENSG00000094841	-0.0237257	3.35681	0.775391	0.868478
CDC23	protein_coding	ENSG00000094880	-0.235134	4.83369	4.91043e-05	0.000228067
AAAS	protein_coding	ENSG00000094914	-0.0521527	4.67109	0.411609	0.556937
CBX5	protein_coding	ENSG00000094916	-0.150171	6.65756	0.00726183	0.0201889
FMO2	protein_coding	ENSG00000094963	0.197355	1.63753	0.107607	0.197255
SUCO	protein_coding	ENSG00000094975	0.204553	6.44588	0.00065458	0.00239312
MSH2	protein_coding	ENSG00000095002	-0.399343	4.51441	4.44698e-11	4.57403e-10
MAP3K1	protein_coding	ENSG00000095015	0.0508467	3.76584	0.458163	0.601877
DHPS	protein_coding	ENSG00000095059	-0.265026	-0.15359	0.243991	0.377146
HOOK2	protein_coding	ENSG00000095066	0.0301013	3.11814	0.712311	0.819753
ARCN1	protein_coding	ENSG00000095139	-0.0421569	8.57563	0.430465	0.575694
EPB41L4B	protein_coding	ENSG00000095203	-0.857843	-0.492327	5.64741e-05	0.000259563
TMEM38B	protein_coding	ENSG00000095209	-0.251555	3.20308	0.00157927	0.00523064
PSMD5	protein_coding	ENSG00000095261	-0.153405	5.9565	0.00575697	0.0164591
PTGS1	protein_coding	ENSG00000095303	-0.513979	7.75344	2.03039e-19	3.82241e-18
NUP188	protein_coding	ENSG00000095319	-0.336429	6.16376	5.27056e-09	4.35266e-08
CRAT	protein_coding	ENSG00000095321	0.0792983	5.24867	0.207955	0.333697
NANS	protein_coding	ENSG00000095380	-0.404285	6.64372	5.61184e-13	6.85546e-12
TBC1D2	protein_coding	ENSG00000095383	-0.669607	6.8767	3.65871e-33	1.26797e-31
WHRN	protein_coding	ENSG00000095397	0.51523	2.22488	8.85343e-07	5.46065e-06
CWF19L1	protein_coding	ENSG00000095485	-0.403376	3.55062	6.16284e-09	5.04701e-08
SEMA4G	protein_coding	ENSG00000095539	0.155059	3.14899	0.0582505	0.119163
BTAF1	protein_coding	ENSG00000095564	-0.0641298	6.05945	0.225213	0.355314
IKZF5	protein_coding	ENSG00000095574	0.32449	3.58111	2.55093e-06	1.46432e-05
SORBS1	protein_coding	ENSG00000095637	0.462667	-0.690922	0.0483708	0.102199
BAMBI	protein_coding	ENSG00000095739	-0.274244	4.26991	7.56551e-06	4.00167e-05
IL11	protein_coding	ENSG00000095752	-1.38595	9.99579	1.84633e-99	3.22468e-97
WAC	protein_coding	ENSG00000095787	0.130415	7.21355	0.0141783	0.0360955
CREM	protein_coding	ENSG00000095794	-0.0645172	3.90747	0.413922	0.558994
NUBP2	protein_coding	ENSG00000095906	-0.124163	4.32058	0.0588881	0.120145
HIVEP1	protein_coding	ENSG00000095951	0.364025	6.3232	6.36573e-09	5.2035e-08
FKBP5	protein_coding	ENSG00000096060	-0.630027	4.02949	2.14805e-18	3.8313e-17
SRPK1	protein_coding	ENSG00000096063	-0.273505	6.06529	1.45137e-06	8.63769e-06
BRPF3	protein_coding	ENSG00000096070	-0.00359063	6.2931	0.950377	0.990339
MRPS18A	protein_coding	ENSG00000096080	-0.249632	4.33276	7.87291e-05	0.000351146
TMEM14A	protein_coding	ENSG00000096092	-0.00276902	3.26437	0.970293	1
EFHC1	protein_coding	ENSG00000096093	0.472643	3.10663	5.12881e-11	5.24477e-10
HSP90AB1	protein_coding	ENSG00000096384	-0.292607	10.1975	1.9718e-07	1.33585e-06
CDC5L	protein_coding	ENSG00000096401	-0.208401	5.75096	0.00108547	0.00375371
ITPR3	protein_coding	ENSG00000096433	-0.310709	5.08871	0.00102531	0.00357581
ZNF184	protein_coding	ENSG00000096654	0.157268	2.76692	0.111891	0.203774
DSP	protein_coding	ENSG00000096696	-0.428927	5.11637	9.45941e-10	8.52217e-09
SIRT1	protein_coding	ENSG00000096717	0.015731	4.75609	0.827428	0.90459
HNRNPH3	protein_coding	ENSG00000096746	-0.238747	7.67093	0.00011465	0.000494117
IFT74	protein_coding	ENSG00000096872	0.18774	3.3772	0.0396801	0.086682
JAK2	protein_coding	ENSG00000096968	0.239875	4.17135	0.000185953	0.000764974
ABL1	protein_coding	ENSG00000097007	0.171769	7.61777	0.00168347	0.00553617
ACOT7	protein_coding	ENSG00000097021	-0.0432915	6.03844	0.418154	0.563201
SH3GLB1	protein_coding	ENSG00000097033	0.136904	7.07761	0.0108944	0.0287408
CDC7	protein_coding	ENSG00000097046	-1.02062	2.23519	1.04986e-32	3.5752e-31
SYDE2	protein_coding	ENSG00000097096	-0.0422665	3.14565	0.599587	0.729127
PCSK5	protein_coding	ENSG00000099139	0.397868	4.07779	7.4852e-10	6.81667e-09
SCD	protein_coding	ENSG00000099194	2.94701	9.33573	0	0
TMED1	protein_coding	ENSG00000099203	-0.0783489	4.40968	0.246936	0.380532
ABLIM1	protein_coding	ENSG00000099204	0.020926	4.4064	0.769716	0.863782
ERMP1	protein_coding	ENSG00000099219	0.20333	3.64042	0.0042832	0.012692
RAB18	protein_coding	ENSG00000099246	0.0362071	6.68393	0.549492	0.685166
NRP1	protein_coding	ENSG00000099250	0.0886107	6.99933	0.106426	0.195435
HSD17B7P2	transcribed_unprocessed_pseudogene	ENSG00000099251	2.76468	-1.17212	3.21534e-26	8.44079e-25
PRTFDC1	protein_coding	ENSG00000099256	-0.250317	3.32503	0.00224075	0.0071361
PALMD	protein_coding	ENSG00000099260	0.683421	0.715393	3.0513e-08	2.29923e-07
TSPAN15	protein_coding	ENSG00000099282	0.126054	0.372918	0.399382	0.544079
H2AFY2	protein_coding	ENSG00000099284	-0.300402	4.25675	4.58147e-06	2.50985e-05
WASHC2A	protein_coding	ENSG00000099290	0.135807	5.97676	0.0153206	0.0385859
MAST3	protein_coding	ENSG00000099308	-0.000755879	3.30223	1	1
MZF1	protein_coding	ENSG00000099326	0.426893	3.13125	0.000929616	0.00327183
OCEL1	protein_coding	ENSG00000099330	0.268989	2.0173	0.0044571	0.0131543
MYO9B	protein_coding	ENSG00000099331	-0.0359975	8.02223	0.489613	0.631527
KCNK6	protein_coding	ENSG00000099337	-0.642931	4.74211	2.68865e-25	6.80456e-24
CATSPERG	protein_coding	ENSG00000099338	1.40466	-2.83801	0.0127533	0.0329625
PSMD8	protein_coding	ENSG00000099341	0.0148321	7.38373	0.776053	0.868817
FBXL19	protein_coding	ENSG00000099364	-0.238953	4.96769	0.000252364	0.00101244
STX1B	protein_coding	ENSG00000099365	0.288742	2.23609	0.0467949	0.0994892
HSD3B7	protein_coding	ENSG00000099377	0.095544	2.99551	0.229612	0.360528
SETD1A	protein_coding	ENSG00000099381	-0.0167433	4.9045	0.793495	0.881439
BCL7C	protein_coding	ENSG00000099385	-0.0357762	5.30058	0.517777	0.656101
EFNA2	protein_coding	ENSG00000099617	0.844209	-2.42719	0.2174	0.345708
CIRBP	protein_coding	ENSG00000099622	0.260031	6.6531	3.61006e-06	2.01715e-05
ATP5F1D	protein_coding	ENSG00000099624	-0.147644	5.21528	0.0356034	0.0791087
CBARP	protein_coding	ENSG00000099625	0.194361	4.64565	0.00514205	0.0148991
HNRNPM	protein_coding	ENSG00000099783	-0.328828	8.03128	2.29981e-07	1.54253e-06
2019-03-02	protein_coding	ENSG00000099785	0.335329	3.65468	6.47913e-07	4.07603e-06
NDUFB7	protein_coding	ENSG00000099795	-0.161695	5.0465	0.00654333	0.0183943
TECR	protein_coding	ENSG00000099797	-0.0913175	4.98541	0.165927	0.279209
TIMM13	protein_coding	ENSG00000099800	-0.2941	5.30477	2.7371e-07	1.81923e-06
CDC34	protein_coding	ENSG00000099804	-0.12381	5.58388	0.0256799	0.0600388
MTAP	protein_coding	ENSG00000099810	-0.162814	5.94484	0.0091611	0.0247135
CEP170B	protein_coding	ENSG00000099814	0.0416517	6.701	0.522145	0.660166
POLR2E	protein_coding	ENSG00000099817	-0.18706	6.68449	0.00036324	0.00140455
POLRMT	protein_coding	ENSG00000099821	-0.157753	4.74686	0.0214921	0.0516795
HCN2	protein_coding	ENSG00000099822	0.0797382	3.3457	0.355073	0.497813
IZUMO4	protein_coding	ENSG00000099840	1.07443	-0.99606	8.79615e-05	0.00038762
RASSF7	protein_coding	ENSG00000099849	-0.559205	1.72955	5.40766e-08	3.97795e-07
GADD45B	protein_coding	ENSG00000099860	-0.392843	5.80252	2.30573e-08	1.76762e-07
PALM	protein_coding	ENSG00000099864	0.485221	4.75727	1.98875e-13	2.49336e-12
MADCAM1	protein_coding	ENSG00000099866	0.222114	-1.96687	0.494258	0.635753
IGF2-AS	antisense	ENSG00000099869	-0.70456	-1.8667	0.0176863	0.0437567
MKNK2	protein_coding	ENSG00000099875	0.382957	5.58767	7.91417e-12	8.69278e-11
ARVCF	protein_coding	ENSG00000099889	1.07482	2.75405	4.62546e-36	1.78151e-34
TRMT2A	protein_coding	ENSG00000099899	-0.265381	4.40427	6.60081e-05	0.000299404
RANBP1	protein_coding	ENSG00000099901	-0.626179	6.58801	3.19336e-27	8.78797e-26
ZDHHC8	protein_coding	ENSG00000099904	-0.217567	5.93405	0.0026997	0.00843925
KLHL22	protein_coding	ENSG00000099910	0.172892	3.35116	0.0182591	0.0449409
MED15	protein_coding	ENSG00000099917	-0.174593	6.35568	0.00448434	0.0132259
SERPIND1	protein_coding	ENSG00000099937	0.629597	-2.86351	0.759362	0.855865
SNAP29	protein_coding	ENSG00000099940	-0.056803	5.64053	0.301358	0.441232
CRKL	protein_coding	ENSG00000099942	-0.0387515	6.06313	0.464698	0.607655
LZTR1	protein_coding	ENSG00000099949	-0.16454	3.13445	0.0512571	0.107231
MMP11	protein_coding	ENSG00000099953	0.625649	2.60168	4.78478e-12	5.36236e-11
SMARCB1	protein_coding	ENSG00000099956	-0.117899	5.65491	0.0298843	0.0684267
P2RX6	protein_coding	ENSG00000099957	1.67763	0.270901	6.3271e-20	1.21978e-18
DERL3	protein_coding	ENSG00000099958	0.400335	-2.51892	0.355605	0.498242
BCL2L13	protein_coding	ENSG00000099968	0.126383	6.23361	0.0190708	0.0466198
DDTL	protein_coding	ENSG00000099974	-0.576768	-2.07451	0.123845	0.22105
GSTT2	polymorphic_pseudogene	ENSG00000099984	0.677383	-2.53995	0.0975626	0.182329
CABIN1	protein_coding	ENSG00000099991	-0.0537757	6.43964	0.368214	0.512368
TBC1D10A	protein_coding	ENSG00000099992	0.238714	3.43014	0.00353927	0.010707
SUSD2	protein_coding	ENSG00000099994	-1.86402	-0.851402	1.16056e-18	2.11054e-17
SF3A1	protein_coding	ENSG00000099995	-0.303934	6.64338	5.3277e-07	3.40017e-06
GGT5	protein_coding	ENSG00000099998	-3.05394	0.412395	1.08369e-72	1.22541e-70
RNF215	protein_coding	ENSG00000099999	0.445855	3.52848	8.61388e-11	8.57016e-10
SEC14L2	protein_coding	ENSG00000100003	-0.288428	3.33067	0.00124508	0.00423544
SPECC1L	protein_coding	ENSG00000100014	-0.0945545	4.44185	0.138069	0.241237
PPIL2	protein_coding	ENSG00000100023	0.0800128	5.39615	0.138306	0.241556
YPEL1	protein_coding	ENSG00000100027	0.69308	0.254668	4.41971e-06	2.43029e-05
SNRPD3	protein_coding	ENSG00000100028	-0.237513	6.6481	0.000865413	0.00306852
PES1	protein_coding	ENSG00000100029	-0.365254	6.47815	4.34212e-12	4.89425e-11
MAPK1	protein_coding	ENSG00000100030	-0.0614353	7.28616	0.243524	0.376723
GGT1	protein_coding	ENSG00000100031	-0.159128	0.210909	0.302961	0.442984
PPM1F	protein_coding	ENSG00000100034	-0.0467112	6.30801	0.372956	0.517242
SLC35E4	protein_coding	ENSG00000100036	0.0638733	3.85178	0.41812	0.563198
TOP3B	protein_coding	ENSG00000100038	-0.147717	3.96268	0.036069	0.0799126
CYTH4	protein_coding	ENSG00000100055	1.40938	-2.2322	0.000984699	0.00345055
ESS2	protein_coding	ENSG00000100056	-0.106263	4.08233	0.0927952	0.175239
CRYBB2P1	transcribed_unprocessed_pseudogene	ENSG00000100058	-0.141373	4.17962	0.0249994	0.058736
MFNG	protein_coding	ENSG00000100060	1.91527	-3.24813	0.0255839	0.0598462
CARD10	protein_coding	ENSG00000100065	0.285966	4.45596	7.18646e-06	3.8149e-05
LRP5L	protein_coding	ENSG00000100068	-0.357066	1.82569	0.000686034	0.00249313
SLC25A1	protein_coding	ENSG00000100075	0.719061	6.17147	2.42441e-30	7.46362e-29
GRK3	protein_coding	ENSG00000100077	-0.262713	2.66575	0.00565054	0.0161863
PLA2G3	protein_coding	ENSG00000100078	5.19164	1.51068	2.01369e-132	5.14804e-130
GGA1	protein_coding	ENSG00000100083	0.0465243	5.09568	0.445598	0.589983
HIRA	protein_coding	ENSG00000100084	-0.182075	2.40185	0.0592125	0.120724
SH3BP1	protein_coding	ENSG00000100092	-0.246169	1.19278	0.0605166	0.122957
LGALS1	protein_coding	ENSG00000100097	0.0978978	9.90748	0.100419	0.186639
HPS4	protein_coding	ENSG00000100099	-0.0106731	4.02479	0.887053	0.946276
PIK3IP1	protein_coding	ENSG00000100100	1.91321	4.07972	1.58202e-164	5.81392e-162
SRRD	protein_coding	ENSG00000100104	-0.0730935	4.02368	0.266752	0.403346
PATZ1	protein_coding	ENSG00000100105	0.0889827	3.67493	0.184015	0.302999
TRIOBP	protein_coding	ENSG00000100106	0.0827778	7.13205	0.111248	0.202756
TFIP11	protein_coding	ENSG00000100109	-0.0716683	5.07564	0.226	0.356077
GCAT	protein_coding	ENSG00000100116	-0.038986	3.62807	0.572975	0.704979
ANKRD54	protein_coding	ENSG00000100124	-0.209259	3.79216	0.00460488	0.0135361
EIF3L	protein_coding	ENSG00000100129	0.292892	6.65505	1.13265e-07	7.89721e-07
SNU13	protein_coding	ENSG00000100138	-0.168683	5.93633	0.00712596	0.0198403
MICALL1	protein_coding	ENSG00000100139	0.0581779	6.17661	0.326787	0.468219
POLR2F	protein_coding	ENSG00000100142	-0.289802	5.00308	7.462e-05	0.00033434
CCDC134	protein_coding	ENSG00000100147	-0.413005	1.34361	0.000119118	0.00051175
DEPDC5	protein_coding	ENSG00000100150	0.0356678	1.80874	0.743329	0.844322
PICK1	protein_coding	ENSG00000100151	-0.267457	1.64984	0.0110738	0.0291511
TTC28	protein_coding	ENSG00000100154	0.355993	5.41979	9.64714e-09	7.73526e-08
CENPM	protein_coding	ENSG00000100162	-1.12583	1.41096	7.47595e-21	1.502e-19
2019-09-03	protein_coding	ENSG00000100167	1.72891	-2.86404	0.00477943	0.0139608
KDELR3	protein_coding	ENSG00000100196	-0.115824	6.74616	0.0352914	0.078554
DDX17	protein_coding	ENSG00000100201	0.142348	8.72564	0.00936236	0.025191
DMC1	protein_coding	ENSG00000100206	-0.956831	-1.18957	3.39469e-05	0.000162126
TCF20	protein_coding	ENSG00000100207	0.343997	5.00843	3.29186e-09	2.77972e-08
HSCB	protein_coding	ENSG00000100209	0.0869461	2.46064	0.374837	0.51929
CBY1	protein_coding	ENSG00000100211	0.298986	4.05695	5.89713e-06	3.17247e-05
TOMM22	protein_coding	ENSG00000100216	-0.283296	5.76832	9.20692e-07	5.66481e-06
XBP1	protein_coding	ENSG00000100219	0.233239	7.02532	9.0661e-06	4.74981e-05
RTCB	protein_coding	ENSG00000100220	-0.213794	6.30598	0.000358962	0.00138923
JOSD1	protein_coding	ENSG00000100221	-0.00992584	5.6775	0.85876	0.927139
FBXO7	protein_coding	ENSG00000100225	0.0302961	6.1734	0.580684	0.711882
GTPBP1	protein_coding	ENSG00000100226	0.0860567	5.51536	0.125674	0.223703
POLDIP3	protein_coding	ENSG00000100227	-0.0274697	6.1706	0.607148	0.73533
RAB36	protein_coding	ENSG00000100228	0.468626	2.23513	1.20681e-06	7.29297e-06
TIMP3	protein_coding	ENSG00000100234	0.302881	11.5269	2.60237e-08	1.9787e-07
PPP6R2	protein_coding	ENSG00000100239	-0.0554558	5.85357	0.319509	0.461033
SBF1	protein_coding	ENSG00000100241	0.0500113	6.74768	0.364759	0.508323
SUN2	protein_coding	ENSG00000100242	-0.294301	6.57949	1.58367e-08	1.23995e-07
CYB5R3	protein_coding	ENSG00000100243	0.264521	9.0862	2.62378e-06	1.50076e-05
DNAL4	protein_coding	ENSG00000100246	0.263537	2.51112	0.00320814	0.0098386
C22orf31	protein_coding	ENSG00000100249	2.14016	-3.75084	0.225568	0.355715
LMF2	protein_coding	ENSG00000100258	-0.138391	6.42037	0.0349734	0.0780432
RHBDD3	protein_coding	ENSG00000100263	0.101389	3.84087	0.171122	0.28596
PACSIN2	protein_coding	ENSG00000100266	0.00409273	6.22784	0.941052	0.983829
TTLL1	protein_coding	ENSG00000100271	0.638337	2.89984	4.36165e-17	7.11085e-16
RASL10A	protein_coding	ENSG00000100276	-1.30741	-1.88354	0.629903	0.753934
AP1B1	protein_coding	ENSG00000100280	-0.240178	6.67747	2.77745e-05	0.000134673
HMGXB4	protein_coding	ENSG00000100281	-0.206067	5.22731	0.000216129	0.000880286
TOM1	protein_coding	ENSG00000100284	0.054122	5.22765	0.340149	0.482333
NEFH	protein_coding	ENSG00000100285	-0.295838	1.71041	0.00618679	0.0175044
CHKB	protein_coding	ENSG00000100288	0.416507	-2.40989	0.472141	0.614745
HMOX1	protein_coding	ENSG00000100292	-1.01957	6.0559	4.15248e-66	3.93816e-64
MCAT	protein_coding	ENSG00000100294	-0.287544	2.74513	0.000437204	0.00166141
THOC5	protein_coding	ENSG00000100296	-0.188417	4.70469	0.00137578	0.0046191
MCM5	protein_coding	ENSG00000100297	-1.37881	5.08054	1.18376e-131	2.98308e-129
ARSA	protein_coding	ENSG00000100299	0.364434	4.54675	3.1565e-09	2.67054e-08
TSPO	protein_coding	ENSG00000100300	0.10867	5.93517	0.0541113	0.112152
RASD2	protein_coding	ENSG00000100302	-0.576354	2.42092	0.0860193	0.164718
TTLL12	protein_coding	ENSG00000100304	-0.521667	4.73602	3.91322e-16	6.03402e-15
CBX7	protein_coding	ENSG00000100307	0.407093	2.27776	0.000632797	0.00232021
PDGFB	protein_coding	ENSG00000100311	0.0465833	1.78593	0.892265	0.949848
CABP7	protein_coding	ENSG00000100314	1.3019	-3.05641	0.467954	0.610691
RPL3	protein_coding	ENSG00000100316	0.214945	9.88611	7.28877e-05	0.000327449
ZMAT5	protein_coding	ENSG00000100319	-0.0369281	3.17482	0.646268	0.766913
RBFOX2	protein_coding	ENSG00000100320	0.148184	8.07137	0.0040354	0.0120366
SYNGR1	protein_coding	ENSG00000100321	0.343646	4.69577	3.92155e-09	3.28472e-08
TAB1	protein_coding	ENSG00000100324	0.132115	4.25255	0.0466401	0.0992678
ASCC2	protein_coding	ENSG00000100325	-0.172443	5.81124	0.00143381	0.00478932
MTMR3	protein_coding	ENSG00000100330	0.214746	5.47866	0.000117398	0.000505098
MIEF1	protein_coding	ENSG00000100335	-0.00973461	5.47425	0.866134	0.93203
APOL1	protein_coding	ENSG00000100342	0.00336052	2.42944	0.985307	1
PNPLA3	protein_coding	ENSG00000100344	1.4824	2.52998	1.76129e-61	1.46552e-59
MYH9	protein_coding	ENSG00000100345	-0.161167	11.5943	0.00208478	0.00670475
SAMM50	protein_coding	ENSG00000100347	-0.218012	4.53954	0.000266858	0.00106598
TXN2	protein_coding	ENSG00000100348	-0.0110391	5.49421	0.840192	0.914332
FOXRED2	protein_coding	ENSG00000100350	-0.638874	3.14676	8.03023e-15	1.1189e-13
EIF3D	protein_coding	ENSG00000100353	-0.0358351	7.50573	0.502187	0.642375
TNRC6B	protein_coding	ENSG00000100354	-0.114636	4.0392	0.0914407	0.173107
SGSM3	protein_coding	ENSG00000100359	-0.13885	-2.62586	0.839416	0.913806
IFT27	protein_coding	ENSG00000100360	0.12447	3.65555	0.0672812	0.134237
KIAA0930	protein_coding	ENSG00000100364	0.0601134	6.30299	0.26386	0.399733
SLC25A17	protein_coding	ENSG00000100372	-0.187435	3.94624	0.00586568	0.0167266
FAM118A	protein_coding	ENSG00000100376	-0.146689	3.98847	0.0327114	0.0738266
KCTD17	protein_coding	ENSG00000100379	-0.162809	4.18187	0.0088801	0.0240622
ST13	protein_coding	ENSG00000100380	0.12096	8.09311	0.0434334	0.0935716
RBX1	protein_coding	ENSG00000100387	-0.0714501	4.36301	0.309418	0.450267
EP300	protein_coding	ENSG00000100393	0.158325	6.37546	0.0224152	0.0536286
L3MBTL2	protein_coding	ENSG00000100395	-0.173919	4.38271	0.00344194	0.0104466
CHADL	protein_coding	ENSG00000100399	0.160521	-1.80766	0.614178	0.74125
RANGAP1	protein_coding	ENSG00000100401	-0.17965	7.69017	0.000474676	0.00179031
ZC3H7B	protein_coding	ENSG00000100403	0.270949	8.66388	4.1292e-07	2.67692e-06
PHF5A	protein_coding	ENSG00000100410	-0.388698	4.31393	4.59391e-09	3.81348e-08
ACO2	protein_coding	ENSG00000100412	0.00750601	6.16958	0.89034	0.948493
POLR3H	protein_coding	ENSG00000100413	-0.108628	5.65588	0.0405985	0.0882836
TRMU	protein_coding	ENSG00000100416	-0.378912	4.43398	5.43758e-10	5.03247e-09
PMM1	protein_coding	ENSG00000100417	-0.0966998	4.59561	0.110398	0.201513
DESI1	protein_coding	ENSG00000100418	-0.237651	5.82877	1.723e-05	8.6248e-05
CERK	protein_coding	ENSG00000100422	-0.259821	6.90394	4.50137e-06	2.47211e-05
BRD1	protein_coding	ENSG00000100425	0.0594814	5.44787	0.279814	0.417661
ZBED4	protein_coding	ENSG00000100426	0.116932	5.41339	0.0386488	0.0847966
MLC1	protein_coding	ENSG00000100427	-2.38584	-1.44431	3.23722e-17	5.31205e-16
HDAC10	protein_coding	ENSG00000100429	-0.251552	-2.00727	0.669305	0.785009
ABHD4	protein_coding	ENSG00000100439	0.537194	5.59715	1.03982e-16	1.64951e-15
KHNYN	protein_coding	ENSG00000100441	0.128754	5.67382	0.0203023	0.0491671
FKBP3	protein_coding	ENSG00000100442	-0.122293	5.65723	0.0243026	0.0573815
SDR39U1	protein_coding	ENSG00000100445	0.117544	3.20347	0.16316	0.275684
RBM23	protein_coding	ENSG00000100461	-0.0559911	4.98047	0.32121	0.462655
PRMT5	protein_coding	ENSG00000100462	-0.295238	5.99835	2.35914e-08	1.80622e-07
COCH	protein_coding	ENSG00000100473	-0.720844	-2.64743	0.131392	0.231845
AP4S1	protein_coding	ENSG00000100478	-0.0446869	2.6126	0.608799	0.736622
POLE2	protein_coding	ENSG00000100479	-1.22507	1.27318	1.17532e-26	3.15086e-25
VCPKMT	protein_coding	ENSG00000100483	-0.151062	2.40252	0.165354	0.278485
SOS2	protein_coding	ENSG00000100485	0.170902	5.41063	0.0058635	0.0167231
CDKL1	protein_coding	ENSG00000100490	0.256213	2.48126	0.00639389	0.0180317
NIN	protein_coding	ENSG00000100503	-0.047864	6.68823	0.396895	0.541412
PYGL	protein_coding	ENSG00000100504	-0.589089	5.3571	4.13645e-25	1.03499e-23
PSMC6	protein_coding	ENSG00000100519	-0.0516048	6.34192	0.477377	0.619778
GNPNAT1	protein_coding	ENSG00000100522	-0.108458	6.87577	0.0737742	0.14471
DDHD1	protein_coding	ENSG00000100523	0.225347	5.20884	0.000156125	0.000654324
CDKN3	protein_coding	ENSG00000100526	-1.03458	2.84249	2.47072e-30	7.59293e-29
CNIH1	protein_coding	ENSG00000100528	0.0836971	6.42886	0.160272	0.271785
CGRRF1	protein_coding	ENSG00000100532	0.270927	2.61057	0.00335556	0.0102196
ATP6V1D	protein_coding	ENSG00000100554	-0.0965786	6.41741	0.125969	0.224068
PLEK2	protein_coding	ENSG00000100558	-0.932259	1.13384	9.94724e-05	0.00043433
PIGH	protein_coding	ENSG00000100564	0.248	2.33068	0.00809454	0.0221996
PSMA3	protein_coding	ENSG00000100567	-0.220193	5.59223	0.00027176	0.0010836
VTI1B	protein_coding	ENSG00000100568	-0.0172007	5.63094	0.753818	0.851575
TIMM9	protein_coding	ENSG00000100575	-0.29104	3.54303	0.00029616	0.00116978
GSTZ1	protein_coding	ENSG00000100577	0.501599	2.1336	6.81965e-08	4.91617e-07
KIAA0586	protein_coding	ENSG00000100578	-0.144452	3.78747	0.0260027	0.0607052
TMED8	protein_coding	ENSG00000100580	0.153481	3.61097	0.0480599	0.101627
SAMD15	protein_coding	ENSG00000100583	0.75011	-1.10968	0.0149985	0.0378556
AHSA1	protein_coding	ENSG00000100591	-0.23334	6.62127	0.000177021	0.000732502
DAAM1	protein_coding	ENSG00000100592	0.00463418	3.1082	0.959245	0.996588
SPTLC2	protein_coding	ENSG00000100596	0.103543	6.58459	0.0654491	0.131211
RIN3	protein_coding	ENSG00000100599	-0.382748	4.43487	3.34926e-07	2.19992e-06
LGMN	protein_coding	ENSG00000100600	0.581853	4.99702	2.09665e-23	4.88571e-22
ALKBH1	protein_coding	ENSG00000100601	-0.156057	3.35396	0.0492138	0.103695
SNW1	protein_coding	ENSG00000100603	-0.148463	6.15491	0.0202677	0.0490899
ITPK1	protein_coding	ENSG00000100605	-0.200526	4.34316	0.00232299	0.00737138
DHRS7	protein_coding	ENSG00000100612	0.351827	5.96432	7.75045e-08	5.55764e-07
PPM1A	protein_coding	ENSG00000100614	0.219478	5.36991	9.12737e-05	0.000400714
SIX4	protein_coding	ENSG00000100625	0.120851	4.96534	0.0371619	0.0819981
GALNT16	protein_coding	ENSG00000100626	1.9962	2.80764	2.66789e-61	2.20947e-59
ASB2	protein_coding	ENSG00000100628	-0.850839	0.0119577	0.0104039	0.027631
CEP128	protein_coding	ENSG00000100629	-0.681265	2.66542	2.64919e-14	3.53226e-13
ERH	protein_coding	ENSG00000100632	-0.208569	5.6619	0.00110618	0.00381486
HIF1A	protein_coding	ENSG00000100644	-0.708475	8.90079	9.51886e-40	4.14599e-38
SUSD6	protein_coding	ENSG00000100647	-0.044378	5.61598	0.430396	0.575646
SRSF5	protein_coding	ENSG00000100650	0.244197	7.53328	1.23132e-05	6.29398e-05
EIF5	protein_coding	ENSG00000100664	-0.0454144	8.13499	0.432525	0.577835
DICER1	protein_coding	ENSG00000100697	-0.099465	6.21789	0.0883438	0.168438
ZFYVE21	protein_coding	ENSG00000100711	0.320307	5.2574	3.37025e-08	2.52125e-07
MTHFD1	protein_coding	ENSG00000100714	-0.702829	5.56175	1.15899e-35	4.39668e-34
ZC3H14	protein_coding	ENSG00000100722	-0.0975254	6.14936	0.0829181	0.159681
TELO2	protein_coding	ENSG00000100726	-0.441408	4.38069	2.14436e-12	2.48043e-11
PCNX1	protein_coding	ENSG00000100731	0.121285	6.53829	0.0356589	0.079202
BDKRB1	protein_coding	ENSG00000100739	-0.811904	4.88966	9.16669e-37	3.60135e-35
GSKIP	protein_coding	ENSG00000100744	-0.136627	4.31729	0.0499838	0.104979
VRK1	protein_coding	ENSG00000100749	-0.543193	3.3357	1.85603e-12	2.15966e-11
PSMC1	protein_coding	ENSG00000100764	-0.00556095	7.14021	0.926823	0.974208
PAPLN	protein_coding	ENSG00000100767	-0.517403	0.30035	0.00137779	0.00462322
RPS6KA5	protein_coding	ENSG00000100784	0.517741	-0.141123	0.0055962	0.0160463
PPP4R3A	protein_coding	ENSG00000100796	-0.0246178	6.33874	0.653815	0.772379
C14orf93	protein_coding	ENSG00000100802	0.142599	1.0595	0.218644	0.347217
PSMB5	protein_coding	ENSG00000100804	-0.0504885	6.77549	0.363881	0.507382
YY1	protein_coding	ENSG00000100811	0.0426575	6.65788	0.419325	0.564347
ACIN1	protein_coding	ENSG00000100813	-0.025636	7.72483	0.622901	0.748448
CCNB1IP1	protein_coding	ENSG00000100814	0.223528	4.14473	0.000757516	0.00272594
TRIP11	protein_coding	ENSG00000100815	0.0372892	6.06318	0.528994	0.666233
APEX1	protein_coding	ENSG00000100823	-0.123261	6.62289	0.0183227	0.0450428
PABPN1	protein_coding	ENSG00000100836	-0.117814	4.72122	0.108946	0.199317
EFS	protein_coding	ENSG00000100842	-0.160984	4.12792	0.0129632	0.0334411
ARHGAP5	protein_coding	ENSG00000100852	-0.0305335	6.65871	0.565523	0.699175
CINP	protein_coding	ENSG00000100865	-0.0406165	4.98312	0.517843	0.656138
SRP54	protein_coding	ENSG00000100883	-0.135139	6.60633	0.0308396	0.0702403
CHD8	protein_coding	ENSG00000100888	0.057875	6.44236	0.290409	0.429586
PCK2	protein_coding	ENSG00000100889	0.799274	5.37861	3.91626e-46	2.11911e-44
KIAA0391	protein_coding	ENSG00000100890	-0.220709	2.57851	0.0130401	0.0336102
DCAF11	protein_coding	ENSG00000100897	0.100089	4.33664	0.128128	0.227245
PSMA6	protein_coding	ENSG00000100902	-0.321942	2.20681	0.0125947	0.0325954
NFKBIA	protein_coding	ENSG00000100906	-0.0446842	5.54146	0.423423	0.568647
EMC9	protein_coding	ENSG00000100908	-0.245947	1.68127	0.0160977	0.0402849
PSME2	protein_coding	ENSG00000100911	-0.22149	5.17933	9.8365e-05	0.000429707
BRMS1L	protein_coding	ENSG00000100916	0.056528	3.43548	0.463793	0.606865
REC8	protein_coding	ENSG00000100918	-0.172407	-0.462558	0.55224	0.687889
TM9SF1	protein_coding	ENSG00000100926	-0.0466943	2.67492	0.591934	0.722111
SEC23A	protein_coding	ENSG00000100934	-0.216098	8.09064	8.52944e-05	0.000377489
GMPR2	protein_coding	ENSG00000100938	-0.224485	4.80101	0.000221574	0.000899346
PNN	protein_coding	ENSG00000100941	-0.111372	7.04106	0.0390549	0.0855705
RABGGTA	protein_coding	ENSG00000100949	0.155125	3.96336	0.0273599	0.063437
NFATC4	protein_coding	ENSG00000100968	0.291195	4.2684	1.69304e-06	9.98171e-06
PLTP	protein_coding	ENSG00000100979	0.721529	4.78556	8.93697e-29	2.61007e-27
PCIF1	protein_coding	ENSG00000100982	-0.00349449	3.69096	0.976661	1
GSS	protein_coding	ENSG00000100983	-0.0647451	5.22862	0.23765	0.369874
TRPC4AP	protein_coding	ENSG00000100991	0.0521003	6.7012	0.318293	0.459655
PYGB	protein_coding	ENSG00000100994	0.308087	7.21554	6.09779e-09	4.99605e-08
ABHD12	protein_coding	ENSG00000100997	-0.111168	6.10326	0.0452685	0.0968593
PROCR	protein_coding	ENSG00000101000	0.108479	3.64515	0.148922	0.255759
GINS1	protein_coding	ENSG00000101003	-0.85648	2.86113	5.60306e-22	1.21274e-20
NINL	protein_coding	ENSG00000101004	0.322482	3.22277	5.29955e-05	0.000245172
UQCC1	protein_coding	ENSG00000101019	0.229752	5.13223	0.000104475	0.000454036
ZMYND8	protein_coding	ENSG00000101040	0.244105	5.43143	1.27534e-05	6.50203e-05
IFT52	protein_coding	ENSG00000101052	0.0665887	4.23841	0.275135	0.412948
MYBL2	protein_coding	ENSG00000101057	-1.16882	4.45137	7.31349e-70	7.58882e-68
NDRG3	protein_coding	ENSG00000101079	-0.213312	4.88063	0.000542888	0.00201994
RAB5IF	protein_coding	ENSG00000101084	-0.310137	4.57529	0.00517973	0.0149935
NFATC2	protein_coding	ENSG00000101096	0.147096	2.94899	0.557188	0.691974
PABPC1L	protein_coding	ENSG00000101104	-0.151675	3.18336	0.438321	0.582881
STK4	protein_coding	ENSG00000101109	-0.0138667	5.62107	0.804906	0.88902
SALL4	protein_coding	ENSG00000101115	0.407981	-1.99244	0.324534	0.46596
ADNP	protein_coding	ENSG00000101126	-0.0785452	6.0932	0.166583	0.280034
PFDN4	protein_coding	ENSG00000101132	-0.107599	3.9947	0.215287	0.343059
DOK5	protein_coding	ENSG00000101134	0.257291	-1.96478	0.610188	0.737999
[truncated: 15,641 more rows]

## Sheet: Q_to_3h
gene_names	gene_biotype	gene_id	logFC	logCPM	PValue	FDR
TSPAN6	protein_coding	ENSG00000000003	-0.133606	4.21672	0.0502205	0.0809549
DPM1	protein_coding	ENSG00000000419	0.958157	5.97338	2.37431e-11	1.06113e-10
SCYL3	protein_coding	ENSG00000000457	-0.949989	2.94501	7.51906e-27	7.07016e-26
C1orf112	protein_coding	ENSG00000000460	-0.0898517	2.30266	0.402483	0.493154
CFH	protein_coding	ENSG00000000971	-0.0915848	5.69231	0.207068	0.281885
FUCA2	protein_coding	ENSG00000001036	0.00929469	6.95646	0.860166	0.905708
GCLC	protein_coding	ENSG00000001084	-0.140965	5.36653	0.0286551	0.0488373
NFYA	protein_coding	ENSG00000001167	0.807117	5.47714	4.16849e-45	6.23154e-44
STPG1	protein_coding	ENSG00000001460	-0.20808	3.59873	0.00443135	0.00883465
NIPAL3	protein_coding	ENSG00000001461	-0.256043	6.90465	9.9351e-07	3.12342e-06
LAS1L	protein_coding	ENSG00000001497	0.123405	4.8126	0.0408436	0.0671401
ENPP4	protein_coding	ENSG00000001561	-0.161895	-2.64737	0.733967	0.79905
SEMA3F	protein_coding	ENSG00000001617	0.0912831	5.86129	0.1131	0.166743
CFTR	protein_coding	ENSG00000001626	-0.201163	-1.68913	0.58485	0.668834
ANKIB1	protein_coding	ENSG00000001629	-0.13865	5.75521	0.0112351	0.0208267
CYP51A1	protein_coding	ENSG00000001630	0.341528	2.95515	6.91319e-05	0.000177071
KRIT1	protein_coding	ENSG00000001631	0.00883449	2.04505	0.942231	0.970057
RAD52	protein_coding	ENSG00000002016	-1.07297	2.28445	3.94729e-25	3.4955e-24
MYH16	transcribed_unitary_pseudogene	ENSG00000002079	0.525333	-2.31753	0.491462	0.580942
BAD	protein_coding	ENSG00000002330	-0.149895	4.6378	0.0166329	0.0298783
LAP3	protein_coding	ENSG00000002549	0.12061	5.72422	0.0423214	0.069382
CD99	protein_coding	ENSG00000002586	-0.0369698	8.50064	0.52408	0.612277
WNT16	protein_coding	ENSG00000002745	-0.19114	3.84544	0.0141475	0.0257306
HECW1	protein_coding	ENSG00000002746	-0.958977	1.3103	5.4634e-15	3.07218e-14
MAD1L1	protein_coding	ENSG00000002822	-0.173293	4.71292	0.00485701	0.00961913
LASP1	protein_coding	ENSG00000002834	0.0148145	9.57068	0.792009	0.848582
SNX11	protein_coding	ENSG00000002919	0.370434	3.64153	5.82799e-06	1.68866e-05
TMEM176A	protein_coding	ENSG00000002933	-0.0326547	3.22204	0.729415	0.795726
M6PR	protein_coding	ENSG00000003056	0.351044	6.67162	1.39069e-10	5.9141e-10
KLHL13	protein_coding	ENSG00000003096	-0.485295	2.64145	2.58887e-07	8.59061e-07
CYP26B1	protein_coding	ENSG00000003137	-1.44814	1.42344	1.99357e-23	1.65568e-22
DBNDD1	protein_coding	ENSG00000003249	-0.18213	4.14154	0.0104427	0.0195075
ALS2	protein_coding	ENSG00000003393	-0.124795	5.87919	0.0205479	0.0362139
CASP10	protein_coding	ENSG00000003400	-1.00332	-0.510998	2.66068e-06	7.98748e-06
CFLAR	protein_coding	ENSG00000003402	0.671364	6.48188	6.11583e-38	7.92676e-37
TFPI	protein_coding	ENSG00000003436	-0.162835	7.16988	0.00314718	0.00642549
NDUFAF7	protein_coding	ENSG00000003509	-0.132326	3.63246	0.0758729	0.116931
RBM5	protein_coding	ENSG00000003756	-0.195177	6.2515	0.000362874	0.00085068
MTMR7	protein_coding	ENSG00000003987	1.22158	-1.68436	6.80965e-05	0.000174571
SLC7A2	protein_coding	ENSG00000003989	1.0649	7.46659	2.11779e-69	4.89619e-68
ARF5	protein_coding	ENSG00000004059	-0.00355417	5.23455	0.957002	0.981165
SARM1	protein_coding	ENSG00000004139	-0.351053	3.9258	1.41166e-06	4.36335e-06
POLDIP2	protein_coding	ENSG00000004142	-0.0676791	6.73451	0.19356	0.266126
PLXND1	protein_coding	ENSG00000004399	0.137652	6.57252	0.0116028	0.0214519
AK2	protein_coding	ENSG00000004455	-0.0950229	6.3142	0.0866887	0.131842
FKBP4	protein_coding	ENSG00000004478	0.24217	5.94293	0.000169557	0.000412939
KDM1A	protein_coding	ENSG00000004487	0.059085	6.35738	0.295849	0.381139
RBM6	protein_coding	ENSG00000004534	-0.144705	6.13024	0.00744108	0.0143063
CAMKK1	protein_coding	ENSG00000004660	1.11472	2.41932	1.76508e-33	2.02313e-32
RECQL	protein_coding	ENSG00000004700	0.235481	6.04565	0.000137094	0.000338136
VPS50	protein_coding	ENSG00000004766	-0.65151	4.02487	1.04567e-14	5.80415e-14
HSPB6	protein_coding	ENSG00000004776	-0.145556	5.78302	0.0778755	0.119683
ARHGAP33	protein_coding	ENSG00000004777	0.204224	1.90246	0.198007	0.271289
NDUFAB1	protein_coding	ENSG00000004779	0.176029	4.9909	0.0029931	0.00613435
PDK4	protein_coding	ENSG00000004799	-3.2688	-3.10499	1.60626e-07	5.41976e-07
ZMYND10	protein_coding	ENSG00000004838	-0.333708	-2.54059	0.612913	0.693997
SLC25A13	protein_coding	ENSG00000004864	0.452272	4.12063	1.64387e-10	6.95561e-10
ST7	protein_coding	ENSG00000004866	0.299238	4.58104	2.19925e-06	6.6692e-06
CDC27	protein_coding	ENSG00000004897	0.331027	7.06466	5.80275e-09	2.19328e-08
HCCS	protein_coding	ENSG00000004961	0.402582	5.16948	2.19251e-11	9.81122e-11
DVL2	protein_coding	ENSG00000004975	-0.541825	4.86057	6.44054e-21	4.80588e-20
UPF1	protein_coding	ENSG00000005007	0.276527	6.98547	1.05345e-06	3.30126e-06
SKAP2	protein_coding	ENSG00000005020	-0.131334	4.86381	0.0307591	0.0520869
SLC25A5	protein_coding	ENSG00000005022	0.323814	6.38196	2.4086e-09	9.38332e-09
MCUB	protein_coding	ENSG00000005059	-0.0471367	2.62718	0.638575	0.71625
POLR2J	protein_coding	ENSG00000005075	0.040993	5.1274	0.553144	0.639123
DHX33	protein_coding	ENSG00000005100	0.777824	5.29924	5.98511e-32	6.5576e-31
MEOX1	protein_coding	ENSG00000005102	3.52808	-2.11655	5.08322e-10	2.07613e-09
LIG3	protein_coding	ENSG00000005156	-0.379628	4.86723	4.40569e-10	1.80778e-09
RPAP3	protein_coding	ENSG00000005175	0.177681	5.19192	0.0106341	0.0198294
REXO5	protein_coding	ENSG00000005189	-0.48858	0.895858	0.00124023	0.00270127
CIAPIN1	protein_coding	ENSG00000005194	0.0094626	4.50711	0.89088	0.929339
SPPL2B	protein_coding	ENSG00000005206	-0.221688	3.96473	0.115984	0.170298
FAM214B	protein_coding	ENSG00000005238	0.405639	5.72714	3.70563e-10	1.52656e-09
COPZ2	protein_coding	ENSG00000005243	-0.207664	4.64759	0.00104669	0.00230276
PRKAR2B	protein_coding	ENSG00000005249	-0.151461	3.44774	0.139576	0.200825
MSL3	protein_coding	ENSG00000005302	-0.00130258	4.40282	0.98708	1
CREBBP	protein_coding	ENSG00000005339	-0.48392	6.40688	7.94939e-15	4.43617e-14
TSPOAP1	protein_coding	ENSG00000005379	0.00137487	0.599487	1	1
GCFC2	protein_coding	ENSG00000005436	-0.0497874	3.21744	0.551992	0.638124
WDR54	protein_coding	ENSG00000005448	-0.4287	1.98463	0.000148628	0.000364747
CROT	protein_coding	ENSG00000005469	-0.565886	3.99991	4.87428e-13	2.43576e-12
KMT2E	protein_coding	ENSG00000005483	-0.187578	6.33107	0.000692178	0.00156178
RHBDD2	protein_coding	ENSG00000005486	-0.221756	4.86403	0.00121014	0.00263932
SOX8	protein_coding	ENSG00000005513	4.87228	1.23727	1.01303e-208	8.93489e-207
IBTK	protein_coding	ENSG00000005700	0.0495825	6.55211	0.462742	0.552318
ZNF195	protein_coding	ENSG00000005801	0.430383	4.06508	1.2094e-09	4.81468e-09
MYCBP2	protein_coding	ENSG00000005810	-0.305373	6.00146	1.90132e-05	5.20069e-05
FBXL3	protein_coding	ENSG00000005812	-0.252764	5.55324	6.8215e-05	0.000174849
PDK2	protein_coding	ENSG00000005882	-0.61633	4.12951	1.64198e-22	1.31776e-21
ITGA3	protein_coding	ENSG00000005884	-0.0458058	7.7015	0.400665	0.49136
ZFX	protein_coding	ENSG00000005889	0.125396	5.14641	0.027784	0.0474821
LAMP2	protein_coding	ENSG00000005893	0.113391	7.38123	0.0404718	0.0666096
ITGA2B	protein_coding	ENSG00000005961	1.91893	-3.39214	0.00371722	0.00750851
GDE1	protein_coding	ENSG00000006007	-0.223351	6.45687	0.000104786	0.000262823
REX1BD	protein_coding	ENSG00000006015	-0.0755654	4.14973	0.257589	0.338766
CRLF1	protein_coding	ENSG00000006016	1.35628	4.65272	2.45437e-111	9.77316e-110
OSBPL7	protein_coding	ENSG00000006025	-1.65979	0.957119	6.99605e-24	5.91896e-23
TMEM98	protein_coding	ENSG00000006042	0.0137159	6.13359	0.801217	0.856367
MAP3K14	protein_coding	ENSG00000006062	0.057564	3.81397	0.478023	0.56791
TMEM132A	protein_coding	ENSG00000006118	0.524561	6.06445	3.91801e-12	1.84895e-11
AP2B1	protein_coding	ENSG00000006125	-0.0599323	8.09235	0.253004	0.333757
ZNF263	protein_coding	ENSG00000006194	0.733886	4.87535	2.56714e-32	2.84987e-31
CX3CL1	protein_coding	ENSG00000006210	-1.05553	-3.87762	0.0938052	0.141405
SPATA20	protein_coding	ENSG00000006282	-0.271057	5.0503	1.24979e-05	3.48393e-05
CACNA1G	protein_coding	ENSG00000006283	1.70701	-1.32818	3.65784e-11	1.61391e-10
TNFRSF12A	protein_coding	ENSG00000006327	1.16943	8.01864	2.09567e-106	7.83212e-105
MAP3K9	protein_coding	ENSG00000006432	-0.458641	-2.44984	0.335454	0.424157
RALA	protein_coding	ENSG00000006451	0.640528	6.6103	9.08896e-20	6.43117e-19
BAIAP2L1	protein_coding	ENSG00000006453	0.145241	3.55785	0.0583224	0.0926245
KDM7A	protein_coding	ENSG00000006459	1.5918	4.45831	2.5557e-117	1.08895e-115
ETV1	protein_coding	ENSG00000006468	-0.454222	4.13156	2.41575e-09	9.40911e-09
AGK	protein_coding	ENSG00000006530	0.0590982	4.66038	0.336264	0.425029
ALDH3B1	protein_coding	ENSG00000006534	-0.655077	4.27554	4.01951e-23	3.30556e-22
PHTF2	protein_coding	ENSG00000006576	0.204475	6.9225	0.000171092	0.000416343
FARP2	protein_coding	ENSG00000006607	1.04942	5.51665	1.24521e-76	3.22548e-75
GGCT	protein_coding	ENSG00000006625	0.241545	1.80933	0.0299487	0.0508563
DBF4	protein_coding	ENSG00000006634	0.0574602	3.90927	0.449213	0.539312
TBXA2R	protein_coding	ENSG00000006638	-0.205422	1.11653	0.150013	0.213526
IFRD1	protein_coding	ENSG00000006652	0.233288	5.60947	3.95639e-05	0.000104399
COX10	protein_coding	ENSG00000006695	0.434066	3.46112	4.68693e-09	1.78261e-08
GTF2IRD1	protein_coding	ENSG00000006704	-0.00609058	4.21404	0.921401	0.953341
PAF1	protein_coding	ENSG00000006712	-0.301458	6.11284	2.24662e-08	8.10935e-08
VPS41	protein_coding	ENSG00000006715	-0.171928	5.49002	0.00326099	0.00663942
ARHGAP44	protein_coding	ENSG00000006740	0.161617	0.0845788	0.415331	0.505761
ELAC2	protein_coding	ENSG00000006744	-0.155626	5.65708	0.00535699	0.0105325
ARSD	protein_coding	ENSG00000006756	-0.473777	3.86552	9.36214e-13	4.60279e-12
PNPLA4	protein_coding	ENSG00000006757	-0.193657	2.20457	0.0400762	0.0660202
MYH13	protein_coding	ENSG00000006788	1.31281	-3.43076	0.0874157	0.132761
ADIPOR2	protein_coding	ENSG00000006831	1.00864	6.53339	2.45627e-79	6.62517e-78
CDKL3	protein_coding	ENSG00000006837	0.013117	-0.498507	0.962881	0.985793
MARK4	protein_coding	ENSG00000007047	0.668055	5.97165	3.93849e-34	4.63167e-33
CCDC124	protein_coding	ENSG00000007080	0.0606182	5.97954	0.368469	0.457893
PAFAH1B1	protein_coding	ENSG00000007168	0.128935	7.30244	0.0137509	0.0250713
KIAA0100	protein_coding	ENSG00000007202	-0.171261	7.46828	0.00124379	0.0027087
GAS7	protein_coding	ENSG00000007237	-0.00139959	4.95471	0.982511	1
TRAPPC6A	protein_coding	ENSG00000007255	0.082086	0.836088	0.566157	0.651129
ST7L	protein_coding	ENSG00000007341	0.153726	4.33031	0.0164528	0.0295849
RPUSD1	protein_coding	ENSG00000007376	0.310839	4.56208	4.39908e-07	1.42542e-06
RHBDF1	protein_coding	ENSG00000007384	-0.108818	5.98068	0.10978	0.162473
LUC7L	protein_coding	ENSG00000007392	0.0979474	5.29483	0.134747	0.194656
BAIAP3	protein_coding	ENSG00000007516	-0.218272	-0.85603	0.34592	0.434989
TSR3	protein_coding	ENSG00000007520	-0.0324125	5.52907	0.578351	0.662733
PIGQ	protein_coding	ENSG00000007541	-0.0257606	3.47741	0.784431	0.842457
CRAMP1	protein_coding	ENSG00000007545	-0.158327	3.5181	0.0784267	0.120446
TEAD3	protein_coding	ENSG00000007866	0.289954	6.39264	1.38568e-06	4.28681e-06
DNAJC11	protein_coding	ENSG00000007923	0.0430865	6.0785	0.438343	0.528673
FMO3	protein_coding	ENSG00000007933	-0.592258	0.838098	2.0193e-05	5.50974e-05
MYLIP	protein_coding	ENSG00000007944	-0.621023	1.91842	1.50566e-07	5.09396e-07
E2F2	protein_coding	ENSG00000007968	-1.01035	0.657403	3.65447e-08	1.29708e-07
PSMB1	protein_coding	ENSG00000008018	0.185286	7.01837	0.036455	0.0606437
SYN1	protein_coding	ENSG00000008056	2.50215	2.17745	1.98243e-88	5.94729e-87
JARID2	protein_coding	ENSG00000008083	1.90008	5.75964	1.7427e-224	1.69841e-222
CDKL5	protein_coding	ENSG00000008086	1.47638	4.94933	1.23011e-141	6.69388e-140
CAMK1G	protein_coding	ENSG00000008118	0.314707	-0.0032653	0.146589	0.20943
CDK11A	protein_coding	ENSG00000008128	0.0501357	-1.7634	0.940042	0.968312
NADK	protein_coding	ENSG00000008130	-0.0489304	5.18926	0.391002	0.481553
DLEC1	protein_coding	ENSG00000008226	-0.429763	-3.57123	0.609993	0.691354
CYTH3	protein_coding	ENSG00000008256	-0.615906	6.70608	5.21409e-29	5.22001e-28
ADAM22	protein_coding	ENSG00000008277	-0.202695	-2.29304	0.682939	0.754827
SYPL1	protein_coding	ENSG00000008282	0.260681	6.19273	4.35582e-05	0.000114477
CYB561	protein_coding	ENSG00000008283	-0.265161	3.0457	0.0040088	0.00804955
SPAG9	protein_coding	ENSG00000008294	0.878739	7.063	2.71227e-59	5.3279e-58
CELSR3	protein_coding	ENSG00000008300	-0.704316	1.72794	4.78762e-09	1.81894e-08
AASS	protein_coding	ENSG00000008311	-0.360756	4.56918	2.15867e-07	7.20783e-07
SS18L2	protein_coding	ENSG00000008324	0.447188	2.33205	2.87555e-05	7.70658e-05
MPND	protein_coding	ENSG00000008382	-0.182104	2.10732	0.0682554	0.106334
MGST1	protein_coding	ENSG00000008394	0.0749855	7.4704	0.188471	0.260305
CRY1	protein_coding	ENSG00000008405	1.21393	5.33793	4.46981e-95	1.4494e-93
NFIX	protein_coding	ENSG00000008441	-0.057716	7.22529	0.319495	0.407218
ST3GAL1	protein_coding	ENSG00000008513	1.99681	8.25282	6.02026e-271	7.32395e-269
MMP25	protein_coding	ENSG00000008516	6.71645	-0.752943	1.22716e-73	3.03607e-72
IL32	protein_coding	ENSG00000008517	0.457628	2.51325	3.07053e-06	9.15552e-06
PKD1	protein_coding	ENSG00000008710	0.451314	7.38367	3.50079e-11	1.54694e-10
MAPK8IP2	protein_coding	ENSG00000008735	-0.0345589	-1.23659	0.954075	0.97888
MED24	protein_coding	ENSG00000008838	-0.0195734	5.33575	0.75248	0.814941
RHOBTB2	protein_coding	ENSG00000008853	-0.922679	4.36668	1.81175e-41	2.52244e-40
HEATR5B	protein_coding	ENSG00000008869	-1.15425	4.18694	1.65984e-68	3.76344e-67
SEC62	protein_coding	ENSG00000008952	0.31819	8.0825	6.52198e-06	1.87864e-05
RPS20	protein_coding	ENSG00000008988	0.0515044	8.29961	0.536429	0.623771
CSDE1	protein_coding	ENSG00000009307	0.122372	9.50658	0.0290311	0.0494218
UBE3C	protein_coding	ENSG00000009335	0.475105	7.25842	5.0104e-17	3.12088e-16
REV3L	protein_coding	ENSG00000009413	-1.1748	5.34582	7.46279e-81	2.04416e-79
FAM76A	protein_coding	ENSG00000009780	-0.764764	1.94577	3.15815e-13	1.60316e-12
POMT2	protein_coding	ENSG00000009830	0.180458	4.34992	0.00353547	0.00716106
VTA1	protein_coding	ENSG00000009844	0.246202	6.12087	3.77155e-05	9.98939e-05
BAZ1B	protein_coding	ENSG00000009954	0.11887	7.18531	0.0275163	0.0470474
RANBP9	protein_coding	ENSG00000010017	0.0529616	5.87189	0.349391	0.438572
ETV7	protein_coding	ENSG00000010030	-0.90129	-2.54071	0.0506189	0.0815524
SPRTN	protein_coding	ENSG00000010072	0.676628	4.01737	4.96391e-25	4.37817e-24
METTL13	protein_coding	ENSG00000010165	-0.329113	4.65222	7.83497e-08	2.7121e-07
DYRK4	protein_coding	ENSG00000010219	-0.305777	2.69927	0.000397971	0.000926882
ZNF207	protein_coding	ENSG00000010244	0.33457	6.90293	1.80926e-09	7.10176e-09
UQCRC1	protein_coding	ENSG00000010256	0.0665329	6.79242	0.214863	0.291
STARD3NL	protein_coding	ENSG00000010270	0.24071	5.30879	0.000120404	0.000299693
CD9	protein_coding	ENSG00000010278	0.71326	6.98019	4.74199e-21	3.56407e-20
NCAPD2	protein_coding	ENSG00000010292	-0.674661	5.75061	1.47565e-32	1.64854e-31
IFFO1	protein_coding	ENSG00000010295	-0.135591	4.76442	0.0399732	0.0658752
GIPR	protein_coding	ENSG00000010310	0.337004	-0.146558	0.124056	0.18072
PHF7	protein_coding	ENSG00000010318	-0.559142	0.643814	0.000211132	0.000508516
SEMA3G	protein_coding	ENSG00000010319	0.221578	-3.35487	0.763088	0.824152
NISCH	protein_coding	ENSG00000010322	-0.34609	6.29016	4.96916e-08	1.74753e-07
FUZ	protein_coding	ENSG00000010361	-0.427313	1.83818	0.000159077	0.000388821
IDS	protein_coding	ENSG00000010404	0.380093	6.23018	5.69588e-12	2.65597e-11
PRSS3	protein_coding	ENSG00000010438	0.823717	0.398087	0.000512352	0.00117666
ZNF200	protein_coding	ENSG00000010539	0.761643	3.06396	2.95996e-19	2.05566e-18
CD4	protein_coding	ENSG00000010610	-0.162693	5.69965	0.00287706	0.00591163
LRRC23	protein_coding	ENSG00000010626	-0.291959	1.83299	0.00519246	0.0102272
HFE	protein_coding	ENSG00000010704	-0.220355	3.66447	0.00110823	0.00243088
SCMH1	protein_coding	ENSG00000010803	-0.115746	4.82516	0.0657951	0.102875
FYN	protein_coding	ENSG00000010810	-0.216905	4.59731	0.000284387	0.000674817
HIVEP2	protein_coding	ENSG00000010818	2.74408	6.50972	0	0
ELOA	protein_coding	ENSG00000011007	0.524788	6.7479	1.42021e-19	9.98901e-19
LYPLA2	protein_coding	ENSG00000011009	0.624503	5.46954	5.02178e-27	4.75747e-26
CLCN6	protein_coding	ENSG00000011021	-0.785026	4.72398	2.69411e-30	2.80876e-29
MRC2	protein_coding	ENSG00000011028	0.10435	9.20734	0.0561678	0.0895112
TSPAN9	protein_coding	ENSG00000011105	0.0168958	6.07082	0.765153	0.826028
BTBD7	protein_coding	ENSG00000011114	0.294967	5.79348	9.18046e-08	3.16272e-07
APBA3	protein_coding	ENSG00000011132	0.112105	3.55896	0.158543	0.223973
MKS1	protein_coding	ENSG00000011143	-1.12604	2.06828	9.50184e-27	8.89663e-26
ABHD5	protein_coding	ENSG00000011198	0.913748	6.45215	1.36679e-53	2.43045e-52
ANOS1	protein_coding	ENSG00000011201	-0.381924	-3.46891	0.729661	0.795828
AKAP8L	protein_coding	ENSG00000011243	0.124284	5.47961	0.0207218	0.0364731
MBTD1	protein_coding	ENSG00000011258	-0.827573	3.11419	1.04863e-23	8.80434e-23
UTP18	protein_coding	ENSG00000011260	0.462315	4.91013	3.91142e-12	1.84633e-11
RNF216	protein_coding	ENSG00000011275	-0.0881877	6.19816	0.0998672	0.149318
TTC19	protein_coding	ENSG00000011295	-0.349789	4.26996	8.66492e-07	2.74366e-06
PTBP1	protein_coding	ENSG00000011304	0.59854	8.39405	7.25966e-31	7.71914e-30
DPF1	protein_coding	ENSG00000011332	-0.458776	2.25769	4.20064e-05	0.00011058
SYT7	protein_coding	ENSG00000011347	1.21972	-0.742153	8.99662e-07	2.84307e-06
LARS2	protein_coding	ENSG00000011376	-0.0539549	4.95204	0.367743	0.457346
PIK3C2A	protein_coding	ENSG00000011405	0.128585	6.2813	0.0214036	0.0375382
PLAUR	protein_coding	ENSG00000011422	1.91823	7.67173	2.98001e-264	3.48128e-262
ANLN	protein_coding	ENSG00000011426	-0.345007	6.95228	4.52923e-10	1.85674e-09
WIZ	protein_coding	ENSG00000011451	0.105854	6.37092	0.0889752	0.13492
RABGAP1	protein_coding	ENSG00000011454	-0.375253	5.89028	2.95577e-12	1.40804e-11
DCN	protein_coding	ENSG00000011465	-0.113303	11.8381	0.0555797	0.0886541
QPCTL	protein_coding	ENSG00000011478	-0.223756	3.20756	0.0176772	0.0315998
PPP5C	protein_coding	ENSG00000011485	-0.0244819	5.77269	0.653571	0.729406
CEP68	protein_coding	ENSG00000011523	-0.712218	3.51862	5.13994e-23	4.20735e-22
MAP4K3	protein_coding	ENSG00000011566	-0.541859	6.27531	6.62129e-21	4.93242e-20
TMEM159	protein_coding	ENSG00000011638	-0.26253	4.11431	9.54834e-05	0.000240756
BRCA1	protein_coding	ENSG00000012048	-0.814756	3.28099	6.12397e-23	4.98739e-22
ERCC1	protein_coding	ENSG00000012061	0.792555	6.60784	2.09613e-45	3.15493e-44
SEMA3B	protein_coding	ENSG00000012171	-0.0350023	6.60061	0.521039	0.609878
MBTPS2	protein_coding	ENSG00000012174	-0.131686	5.35989	0.0225607	0.0393408
PRICKLE3	protein_coding	ENSG00000012211	0.330269	2.91947	7.65859e-05	0.000195482
LTF	protein_coding	ENSG00000012223	0.474821	-3.28304	0.336532	0.425306
EXTL3	protein_coding	ENSG00000012232	-0.139632	6.12141	0.0099099	0.018589
ELOVL5	protein_coding	ENSG00000012660	0.671448	7.25648	1.82913e-19	1.27989e-18
CALCOCO1	protein_coding	ENSG00000012822	-0.208009	5.83164	0.000113161	0.000282781
UBR7	protein_coding	ENSG00000012963	0.349259	4.79386	5.93642e-08	2.07363e-07
MAP4K5	protein_coding	ENSG00000012983	0.325094	7.09272	3.03725e-08	1.08456e-07
EHD3	protein_coding	ENSG00000013016	-0.459441	5.79743	1.93112e-16	1.16701e-15
PSMC4	protein_coding	ENSG00000013275	0.334389	6.26679	2.57023e-10	1.07235e-09
MAN2B2	protein_coding	ENSG00000013288	-0.10525	7.06216	0.0523904	0.0840534
SLC7A14	protein_coding	ENSG00000013293	-0.883373	3.70181	1.02225e-33	1.18635e-32
CLDN11	protein_coding	ENSG00000013297	-0.627977	6.36678	1.00589e-23	8.45349e-23
SLC25A39	protein_coding	ENSG00000013306	0.003483	5.64875	0.953883	0.978827
MVP	protein_coding	ENSG00000013364	-0.166262	7.72992	0.00144459	0.00311446
NUB1	protein_coding	ENSG00000013374	-0.181836	5.80874	0.0031201	0.00637833
PGM3	protein_coding	ENSG00000013375	0.601126	7.14742	1.88181e-27	1.80115e-26
RWDD2A	protein_coding	ENSG00000013392	-0.777337	3.0523	1.12171e-20	8.2687e-20
CLK1	protein_coding	ENSG00000013441	-0.843715	5.49921	6.54409e-42	9.169e-41
POLR3B	protein_coding	ENSG00000013503	-0.95823	4.27306	2.28312e-49	3.77099e-48
ANGEL1	protein_coding	ENSG00000013523	-0.384648	3.25625	2.58969e-07	8.59172e-07
RNF14	protein_coding	ENSG00000013561	-0.14031	5.28004	0.0199735	0.0352964
DNASE1L1	protein_coding	ENSG00000013563	0.0363119	4.62904	0.564712	0.649975
DDX11	protein_coding	ENSG00000013573	-0.240914	3.1	0.0150983	0.0273388
HEBP1	protein_coding	ENSG00000013583	-0.443914	5.79426	1.05703e-15	6.18032e-15
GPRC5A	protein_coding	ENSG00000013588	-0.0786225	6.65635	0.145467	0.207994
MAMLD1	protein_coding	ENSG00000013619	-0.0829649	5.46457	0.162425	0.228922
TACC3	protein_coding	ENSG00000013810	-0.438123	5.18378	4.34791e-12	2.04362e-11
UFL1	protein_coding	ENSG00000014123	-0.643673	5.26125	1.34764e-20	9.90103e-20
POLA2	protein_coding	ENSG00000014138	-0.356809	-0.0643773	0.0920587	0.139022
ZC3H3	protein_coding	ENSG00000014164	-0.022515	4.38079	0.776134	0.835072
CAPN1	protein_coding	ENSG00000014216	-0.152066	7.09767	0.00318388	0.00649591
ACPP	protein_coding	ENSG00000014257	0.201714	2.32389	0.0357555	0.0596433
MDH1	protein_coding	ENSG00000014641	-0.121659	5.60469	0.0314778	0.0531611
SLC30A9	protein_coding	ENSG00000014824	-0.0495351	6.45088	0.419627	0.509879
MTMR11	protein_coding	ENSG00000014914	-0.453144	2.47255	1.84203e-05	5.04399e-05
COX15	protein_coding	ENSG00000014919	-1.27344	3.11248	4.67598e-54	8.37403e-53
CCDC88C	protein_coding	ENSG00000015133	0.875877	-2.94453	0.206792	0.281617
YAF2	protein_coding	ENSG00000015153	0.497856	3.68508	3.99474e-13	2.00876e-12
ZMYND11	protein_coding	ENSG00000015171	0.229603	6.92871	0.000101911	0.000256083
WAS	protein_coding	ENSG00000015285	0.215296	-2.90426	0.68092	0.753132
BID	protein_coding	ENSG00000015475	0.293275	5.4953	2.22429e-07	7.41571e-07
MATR3	protein_coding	ENSG00000015479	-0.478257	0.407399	0.00812792	0.0155052
NPC1L1	protein_coding	ENSG00000015520	-0.569531	-1.72083	0.0651167	0.102039
XYLT2	protein_coding	ENSG00000015532	-0.515734	5.8475	9.28928e-22	7.23457e-21
RGPD5	protein_coding	ENSG00000015568	1.12521	0.873867	2.33804e-15	1.34211e-14
NUDCD3	protein_coding	ENSG00000015676	-0.315593	5.88936	4.77061e-09	1.81287e-08
GLT8D1	protein_coding	ENSG00000016864	-0.476202	5.63062	6.55839e-14	3.48674e-13
ATP2C1	protein_coding	ENSG00000017260	0.128546	6.77964	0.0231755	0.0403013
IGF1	protein_coding	ENSG00000017427	2.99775	-0.820261	1.49005e-22	1.19801e-21
SLC38A5	protein_coding	ENSG00000017483	0.340976	3.18439	4.41479e-05	0.000115957
RALBP1	protein_coding	ENSG00000017797	-0.282878	6.89437	2.73358e-07	9.05038e-07
RUFY3	protein_coding	ENSG00000018189	0.197343	4.65175	0.00162175	0.00346928
CNTN1	protein_coding	ENSG00000018236	3.04071	-1.63384	5.84122e-09	2.20688e-08
WWTR1	protein_coding	ENSG00000018408	0.891771	7.29002	9.16268e-62	1.87288e-60
AGPS	protein_coding	ENSG00000018510	0.217373	5.9376	0.000206692	0.000498775
CXorf56	protein_coding	ENSG00000018610	0.155133	3.71517	0.0261848	0.0450019
ATP1A2	protein_coding	ENSG00000018625	-0.750804	4.42378	5.81077e-31	6.18599e-30
TTC27	protein_coding	ENSG00000018699	0.207955	4.12145	0.00302668	0.00619884
ZNF582	protein_coding	ENSG00000018869	0.238569	1.08948	0.0879586	0.133527
PHLDB1	protein_coding	ENSG00000019144	1.06688	7.81564	6.99605e-94	2.24382e-92
PRDM11	protein_coding	ENSG00000019485	-0.309908	2.61659	0.000371119	0.000868375
SNAI2	protein_coding	ENSG00000019549	-1.04263	5.70479	6.64341e-69	1.518e-67
CD74	protein_coding	ENSG00000019582	0.0607959	-1.50464	0.876417	0.919199
HGF	protein_coding	ENSG00000019991	-0.167933	8.70872	0.00592658	0.0115666
ZRANB1	protein_coding	ENSG00000019995	-0.43	6.20312	7.75376e-15	4.32836e-14
NCDN	protein_coding	ENSG00000020129	0.0854623	5.41134	0.197754	0.271005
ADGRA2	protein_coding	ENSG00000020181	-0.219397	8.06048	3.24689e-05	8.65185e-05
ZFP64	protein_coding	ENSG00000020256	-0.636835	3.85672	1.35651e-20	9.96207e-20
MNAT1	protein_coding	ENSG00000020426	0.109427	4.61296	0.149092	0.212473
SAMD4A	protein_coding	ENSG00000020577	1.24994	7.72977	2.12657e-127	1.00841e-125
RUNX3	protein_coding	ENSG00000020633	1.63046	-0.166866	2.12342e-14	1.15895e-13
MRE11	protein_coding	ENSG00000020922	-0.359105	4.09378	8.07127e-08	2.79171e-07
PLEKHB1	protein_coding	ENSG00000021300	-0.0277327	-1.57052	0.94292	0.970638
SERPINB1	protein_coding	ENSG00000021355	-0.368673	4.60204	1.41469e-08	5.18819e-08
SPAST	protein_coding	ENSG00000021574	-0.704395	3.97697	1.4874e-21	1.14776e-20
NRXN3	protein_coding	ENSG00000021645	0.102882	2.29309	0.359673	0.449146
OSBPL5	protein_coding	ENSG00000021762	-0.404779	5.30447	1.78288e-12	8.63772e-12
AQR	protein_coding	ENSG00000021776	-0.019528	5.77532	0.746555	0.809916
CPS1	protein_coding	ENSG00000021826	-0.331792	2.6584	0.000130571	0.000323086
FHL1	protein_coding	ENSG00000022267	-0.266293	6.82287	9.10988e-07	2.87681e-06
RTF2	protein_coding	ENSG00000022277	-0.00471992	6.01743	0.942658	0.97044
SLC45A4	protein_coding	ENSG00000022567	0.296862	3.67496	2.09674e-05	5.71661e-05
RNF10	protein_coding	ENSG00000022840	0.111802	7.1724	0.0341206	0.0572845
ZNF839	protein_coding	ENSG00000022976	-1.10822	2.88692	1.15332e-35	1.41577e-34
ZDHHC6	protein_coding	ENSG00000023041	0.252479	4.98687	3.76082e-05	9.96407e-05
GRAMD1B	protein_coding	ENSG00000023171	0.388577	3.10871	0.000148003	0.000363263
RNH1	protein_coding	ENSG00000023191	-0.0349631	7.04145	0.511251	0.60067
NDUFS1	protein_coding	ENSG00000023228	-0.135912	6.25768	0.0182897	0.032612
RB1CC1	protein_coding	ENSG00000023287	-0.0621975	6.33361	0.353062	0.44255
ERP44	protein_coding	ENSG00000023318	0.0968914	6.63979	0.0865501	0.131661
ALAS1	protein_coding	ENSG00000023330	-0.413815	5.58951	3.74232e-14	2.0151e-13
BIRC3	protein_coding	ENSG00000023445	3.76036	5.09198	0	0
AKAP11	protein_coding	ENSG00000023516	-0.370272	6.09298	2.38489e-11	1.06532e-10
GLRX2	protein_coding	ENSG00000023572	-0.425769	3.75403	9.18353e-08	3.16278e-07
SNAPC1	protein_coding	ENSG00000023608	0.167805	3.9669	0.0550393	0.0879034
DERA	protein_coding	ENSG00000023697	-0.260124	4.34964	2.27128e-05	6.16581e-05
STRAP	protein_coding	ENSG00000023734	0.464016	7.5978	1.72876e-12	8.38667e-12
ABCC2	protein_coding	ENSG00000023839	1.09006	-0.580661	2.95155e-07	9.71911e-07
DEF6	protein_coding	ENSG00000023892	-0.453398	-0.444387	0.0769479	0.118392
PLEKHO1	protein_coding	ENSG00000023902	0.778694	6.54471	3.25201e-45	4.86973e-44
GCLM	protein_coding	ENSG00000023909	0.892276	6.51711	2.47773e-47	3.92344e-46
UBR2	protein_coding	ENSG00000024048	-0.487284	5.22484	1.59998e-16	9.70549e-16
EHD2	protein_coding	ENSG00000024422	-0.297887	9.00813	1.50806e-06	4.65075e-06
DEPDC1	protein_coding	ENSG00000024526	-0.286093	4.49453	7.72151e-06	2.20472e-05
CCDC28A	protein_coding	ENSG00000024862	-0.871678	2.17302	1.13713e-16	6.95287e-16
HSF2	protein_coding	ENSG00000025156	-1.32993	3.1528	1.82355e-60	3.64298e-59
PHF20	protein_coding	ENSG00000025293	-0.259298	5.45133	4.08556e-06	1.20316e-05
HSD17B6	protein_coding	ENSG00000025423	0.207797	2.66806	0.0372142	0.061796
NR1H3	protein_coding	ENSG00000025434	-0.820848	2.41733	2.37434e-16	1.42849e-15
TYMP	protein_coding	ENSG00000025708	0.487408	1.07647	0.0015937	0.00341341
NCAPH2	protein_coding	ENSG00000025770	0.146712	4.16476	0.0259011	0.0445708
TOMM34	protein_coding	ENSG00000025772	0.65128	5.27114	1.27494e-26	1.18492e-25
SEC63	protein_coding	ENSG00000025796	0.0602453	7.69457	0.274388	0.357554
KPNA6	protein_coding	ENSG00000025800	0.100055	6.34316	0.0592375	0.0939196
VIM	protein_coding	ENSG00000026025	0.442422	12.1732	5.63713e-17	3.50261e-16
RTEL1-TNFRSF6B	protein_coding	ENSG00000026036	-0.489431	-0.886916	0.140933	0.202514
FAS	protein_coding	ENSG00000026103	0.125454	5.59344	0.0360272	0.0600233
RNASET2	protein_coding	ENSG00000026297	-0.0757727	1.82636	0.489361	0.579117
CD44	protein_coding	ENSG00000026508	-0.0280248	11.69	0.6209	0.700809
KCNG1	protein_coding	ENSG00000026559	3.31651	6.81391	0	0
AGPAT4	protein_coding	ENSG00000026652	0.290514	3.38484	5.77613e-05	0.000149554
BTN3A1	protein_coding	ENSG00000026950	-0.464766	3.81592	9.33898e-11	4.01217e-10
MIPEP	protein_coding	ENSG00000027001	-0.28636	3.55381	0.000375888	0.000878699
PRKCH	protein_coding	ENSG00000027075	1.09722	-0.755826	1.54505e-05	4.26989e-05
IFNGR1	protein_coding	ENSG00000027697	0.225668	5.14252	0.000132123	0.00032665
B4GALT7	protein_coding	ENSG00000027847	-0.200055	4.49581	0.0013273	0.00287919
SH2D2A	protein_coding	ENSG00000027869	-0.0918473	-2.63591	1	1
VRK2	protein_coding	ENSG00000028116	0.0649862	4.07275	0.333624	0.422085
TNFRSF1B	protein_coding	ENSG00000028137	0.0217505	3.80785	0.777453	0.836236
VEZT	protein_coding	ENSG00000028203	0.105677	6.0867	0.0618187	0.0974515
POU2F2	protein_coding	ENSG00000028277	2.87576	4.47593	0	0
BRD9	protein_coding	ENSG00000028310	0.29281	5.40253	2.43591e-07	8.09826e-07
SNX1	protein_coding	ENSG00000028528	0.0331815	6.41484	0.528933	0.616885
TBPL1	protein_coding	ENSG00000028839	0.386505	4.1523	2.45494e-07	8.15848e-07
ARNTL2	protein_coding	ENSG00000029153	1.39558	6.43582	1.7655e-124	8.17415e-123
BCLAF1	protein_coding	ENSG00000029363	-0.089475	7.44659	0.132975	0.192285
SLC39A9	protein_coding	ENSG00000029364	-4.58928e-05	6.1561	1	1
ANK1	protein_coding	ENSG00000029534	-0.211713	2.26272	0.0254411	0.0438562
TFB1M	protein_coding	ENSG00000029639	-0.944566	2.47332	1.23781e-22	9.9794e-22
RABEP1	protein_coding	ENSG00000029725	0.433433	6.61792	9.47835e-15	5.27106e-14
HMGB3	protein_coding	ENSG00000029993	-0.14195	4.74149	0.0301967	0.0512035
NUP160	protein_coding	ENSG00000030066	0.0642659	5.31055	0.270999	0.354026
BAK1	protein_coding	ENSG00000030110	1.27862	4.81788	3.76267e-102	1.33818e-100
MUSK	protein_coding	ENSG00000030304	-0.592239	0.143253	0.000287838	0.000682547
IKZF2	protein_coding	ENSG00000030419	0.760608	3.49662	1.01405e-21	7.8801e-21
GRN	protein_coding	ENSG00000030582	-0.0933952	7.61931	0.0967696	0.145315
FAM13B	protein_coding	ENSG00000031003	0.0261571	5.97806	0.640095	0.717453
ARHGAP31	protein_coding	ENSG00000031081	2.20958	6.31435	0	0
CENPQ	protein_coding	ENSG00000031691	-0.102427	2.15872	0.338448	0.427377
SARS	protein_coding	ENSG00000031698	-0.0647213	7.94771	0.250105	0.330476
RANBP3	protein_coding	ENSG00000031823	-0.44479	5.9945	8.42621e-15	4.69483e-14
ARID4A	protein_coding	ENSG00000032219	-1.43363	4.45292	1.04656e-83	2.97763e-82
EIPR1	protein_coding	ENSG00000032389	-0.28852	3.71165	0.000101082	0.000254255
PNPLA6	protein_coding	ENSG00000032444	-0.242203	5.7278	1.76507e-05	4.83851e-05
IFT88	protein_coding	ENSG00000032742	-0.294377	3.47241	8.13174e-05	0.000207049
ALG1	protein_coding	ENSG00000033011	-0.167753	4.60485	0.0140874	0.0256405
ZCCHC8	protein_coding	ENSG00000033030	0.414614	4.44165	6.2065e-12	2.88796e-11
ABCF2	protein_coding	ENSG00000033050	0.364185	3.66485	3.22723e-06	9.59681e-06
CHPF2	protein_coding	ENSG00000033100	0.081521	7.47749	0.127876	0.185626
FUT8	protein_coding	ENSG00000033170	-0.241007	4.7471	0.000139808	0.000344348
UBA6	protein_coding	ENSG00000033178	0.24316	5.94962	2.34324e-05	6.35235e-05
GAB2	protein_coding	ENSG00000033327	0.123046	4.36183	0.0551664	0.0880586
ATP6V0A1	protein_coding	ENSG00000033627	0.753176	4.96449	2.8802e-25	2.56599e-24
PIAS1	protein_coding	ENSG00000033800	-0.328347	5.14186	9.43262e-08	3.24603e-07
SLC4A7	protein_coding	ENSG00000033867	1.31577	6.87681	3.87075e-120	1.69851e-118
APBA2	protein_coding	ENSG00000034053	0.19298	5.75554	0.000690238	0.001558
MAP2K3	protein_coding	ENSG00000034152	2.2415	7.48228	0	0
TMSB10	protein_coding	ENSG00000034510	0.0266605	10.2281	0.691171	0.762063
ASTE1	protein_coding	ENSG00000034533	-0.223851	2.40304	0.0184035	0.0327917
RNF19A	protein_coding	ENSG00000034677	0.477134	5.69712	2.32024e-14	1.26441e-13
PEX3	protein_coding	ENSG00000034693	-0.0165311	3.56155	0.84663	0.894606
GABARAPL2	protein_coding	ENSG00000034713	0.0208335	5.22632	0.782713	0.840817
SH3YL1	protein_coding	ENSG00000035115	-0.520295	3.9671	1.49397e-13	7.74878e-13
FAM136A	protein_coding	ENSG00000035141	-0.137216	4.88478	0.0402602	0.0662924
VCL	protein_coding	ENSG00000035403	0.694003	9.82902	5.2198e-39	6.91791e-38
DEPDC1B	protein_coding	ENSG00000035499	-1.06967	1.69932	3.69279e-15	2.09658e-14
DAPK2	protein_coding	ENSG00000035664	1.23221	1.30467	2.54482e-24	2.18872e-23
NSMAF	protein_coding	ENSG00000035681	-0.0225822	5.63897	0.680885	0.753132
ADSS	protein_coding	ENSG00000035687	0.0462396	5.60056	0.486694	0.576348
TIMP2	protein_coding	ENSG00000035862	0.139915	9.88636	0.0190819	0.0338807
RFC1	protein_coding	ENSG00000035928	-0.525081	5.44511	4.9744e-18	3.26932e-17
TBC1D23	protein_coding	ENSG00000036054	0.485839	5.93582	3.36229e-16	2.00917e-15
CUL3	protein_coding	ENSG00000036257	0.377425	6.75494	5.67956e-11	2.47927e-10
MYOM2	protein_coding	ENSG00000036448	-0.902546	-3.2841	0.161321	0.227475
CYP46A1	protein_coding	ENSG00000036530	-0.467576	-0.315676	0.018777	0.0333999
AC118549.1	protein_coding	ENSG00000036549	-0.107116	5.90004	0.0627861	0.0987206
USP2	protein_coding	ENSG00000036672	0.877539	0.865455	3.62025e-08	1.28545e-07
TUBG2	protein_coding	ENSG00000037042	-0.538504	3.14476	1.52685e-08	5.57862e-08
RPL26L1	protein_coding	ENSG00000037241	0.743612	4.60819	2.16779e-24	1.87267e-23
FLT4	protein_coding	ENSG00000037280	0.0743083	-1.67584	0.88502	0.925141
NSUN2	protein_coding	ENSG00000037474	1.10009	6.80049	1.59107e-93	5.0845e-92
FBXO42	protein_coding	ENSG00000037637	-0.495314	4.51176	6.26517e-15	3.51295e-14
MFAP3	protein_coding	ENSG00000037749	0.299057	5.04835	1.93436e-05	5.28861e-05
MRI1	protein_coding	ENSG00000037757	-0.282027	4.00303	9.34134e-05	0.000235975
METTL1	protein_coding	ENSG00000037897	0.640531	3.43887	1.30772e-16	7.96831e-16
HOXC8	protein_coding	ENSG00000037965	-0.66415	-1.05399	0.008964	0.0169662
AGA	protein_coding	ENSG00000038002	-0.063104	3.37274	0.453409	0.543315
PI4K2B	protein_coding	ENSG00000038210	-0.37523	3.61097	4.3228e-06	1.26879e-05
BOD1L1	protein_coding	ENSG00000038219	0.124422	6.36216	0.027358	0.0468085
MAT2B	protein_coding	ENSG00000038274	-0.648253	5.1934	2.97823e-27	2.84285e-26
EDC4	protein_coding	ENSG00000038358	0.293267	5.48376	4.52992e-06	1.32649e-05
TRIO	protein_coding	ENSG00000038382	0.392614	8.77534	2.9305e-11	1.30048e-10
VCAN	protein_coding	ENSG00000038427	0.465464	7.33583	1.65257e-15	9.55153e-15
CLEC16A	protein_coding	ENSG00000038532	0.036642	5.04053	0.523642	0.612008
MSR1	protein_coding	ENSG00000038945	0.104269	-0.777593	0.6614	0.736374
MTREX	protein_coding	ENSG00000039123	0.204836	6.25878	0.000759849	0.00170401
DNAH5	protein_coding	ENSG00000039139	-0.58856	4.97607	2.49705e-22	1.98862e-21
ZFYVE16	protein_coding	ENSG00000039319	0.441043	5.75489	8.08746e-14	4.27774e-13
RIPOR1	protein_coding	ENSG00000039523	1.02634	6.92107	1.5826e-46	2.44672e-45
C6	protein_coding	ENSG00000039537	-0.209428	-0.855337	0.398123	0.488923
RAI14	protein_coding	ENSG00000039560	0.470089	9.24167	5.82948e-18	3.81991e-17
PNKP	protein_coding	ENSG00000039650	0.194287	4.40623	0.0262721	0.04513
PHLPP2	protein_coding	ENSG00000040199	1.30662	5.42162	8.5955e-115	3.57605e-113
SPDL1	protein_coding	ENSG00000040275	2.73522	6.37178	0	0
STAU2	protein_coding	ENSG00000040341	-0.263691	4.60295	1.44733e-05	4.01052e-05
PQLC2	protein_coding	ENSG00000040487	-0.273819	3.6092	9.04891e-05	0.000229146
CTNS	protein_coding	ENSG00000040531	-0.391873	3.56956	1.79721e-07	6.03632e-07
RTN4R	protein_coding	ENSG00000040608	0.729254	-1.60085	0.0228739	0.0398396
PHF23	protein_coding	ENSG00000040633	0.339652	6.05637	4.08115e-10	1.67773e-09
INPP4A	protein_coding	ENSG00000040933	0.150296	4.62285	0.0097023	0.0182325
RAB27B	protein_coding	ENSG00000041353	0.0677671	0.588114	0.752736	0.815167
PSMA4	protein_coding	ENSG00000041357	0.0763186	6.53335	0.235541	0.314364
MYO16	protein_coding	ENSG00000041515	0.615122	-3.21569	0.54308	0.630168
LSG1	protein_coding	ENSG00000041802	0.383235	5.56232	1.64165e-11	7.40254e-11
PARP3	protein_coding	ENSG00000041880	-0.327715	3.28612	6.43314e-05	0.00016552
TNC	protein_coding	ENSG00000041982	1.44377	10.5149	8.39575e-121	3.72113e-119
THAP3	protein_coding	ENSG00000041988	-0.196751	3.34748	0.013121	0.0240373
RIPOR3	protein_coding	ENSG00000042062	-1.13911	4.22447	2.26053e-50	3.81586e-49
TDP1	protein_coding	ENSG00000042088	0.0230125	3.70889	0.759661	0.821105
AIFM2	protein_coding	ENSG00000042286	-0.00984377	5.04326	0.875779	0.918803
SPATA7	protein_coding	ENSG00000042317	-1.50598	3.56152	5.86652e-85	1.70206e-83
MED17	protein_coding	ENSG00000042429	0.625077	2.06308	2.26978e-09	8.86014e-09
RETSAT	protein_coding	ENSG00000042445	-0.239922	5.28263	2.39637e-05	6.48242e-05
CAPG	protein_coding	ENSG00000042493	-0.163545	4.62438	0.00701772	0.01355
AP2S1	protein_coding	ENSG00000042753	0.0125314	5.39625	0.853269	0.899897
USH2A	protein_coding	ENSG00000042781	1.40595	-3.33659	0.100349	0.149924
TG	protein_coding	ENSG00000042832	0.329285	-2.67056	0.535353	0.622766
DCUN1D1	protein_coding	ENSG00000043093	0.250042	5.17933	0.000139997	0.000344764
JADE2	protein_coding	ENSG00000043143	-1.5153	5.11194	5.83906e-144	3.26987e-142
TRIT1	protein_coding	ENSG00000043514	0.276319	3.21771	0.00103851	0.00228564
CUL7	protein_coding	ENSG00000044090	-0.554831	5.32513	4.39737e-21	3.31494e-20
CTNNA1	protein_coding	ENSG00000044115	0.231329	8.84437	9.82396e-06	2.7736e-05
PHKA2	protein_coding	ENSG00000044446	0.224428	3.77577	0.00144089	0.00310726
CNTLN	protein_coding	ENSG00000044459	-0.474065	3.63997	3.04783e-10	1.26295e-09
HSPA5	protein_coding	ENSG00000044574	0.0690175	10.3493	0.224052	0.301632
DSG2	protein_coding	ENSG00000046604	0.291558	0.461903	0.0986542	0.14773
GEMIN8	protein_coding	ENSG00000046647	-0.562013	2.9256	2.8323e-12	1.35169e-11
OFD1	protein_coding	ENSG00000046651	0.0568931	4.25132	0.422309	0.512383
GPM6B	protein_coding	ENSG00000046653	0.28657	-1.6577	0.492202	0.581583
WDR37	protein_coding	ENSG00000047056	0.210052	4.90394	0.000244824	0.000585389
YTHDC2	protein_coding	ENSG00000047188	-0.279291	5.16077	6.08603e-06	1.75852e-05
CTPS2	protein_coding	ENSG00000047230	-0.537321	4.07084	1.21925e-16	7.44209e-16
ATP6V1H	protein_coding	ENSG00000047249	-0.141398	4.76213	0.0299148	0.0508086
POLR2B	protein_coding	ENSG00000047315	0.159794	6.96963	0.00599212	0.0116835
FAM214A	protein_coding	ENSG00000047346	-1.29878	3.22206	4.30194e-61	8.70255e-60
ARAP2	protein_coding	ENSG00000047365	7.07867	-3.98524	2.07802e-09	8.12416e-09
TPR	protein_coding	ENSG00000047410	0.0674504	7.32569	0.226296	0.304189
KIAA0556	protein_coding	ENSG00000047578	-0.193461	4.74956	0.000807077	0.00180259
DTNBP1	protein_coding	ENSG00000047579	-0.855942	2.7649	3.47796e-21	2.6399e-20
XK	protein_coding	ENSG00000047597	1.46509	-2.29195	0.00013916	0.000342894
C12orf4	protein_coding	ENSG00000047621	0.0245005	4.55573	0.705658	0.774406
SCML1	protein_coding	ENSG00000047634	0.287775	4.81883	4.75914e-06	1.39061e-05
WWC3	protein_coding	ENSG00000047644	0.498466	6.39887	1.60666e-20	1.17697e-19
ARHGAP6	protein_coding	ENSG00000047648	-0.563565	1.81243	6.68214e-07	2.13075e-06
FAM184B	protein_coding	ENSG00000047662	0.345888	-1.19378	0.315424	0.40264
MAP4	protein_coding	ENSG00000047849	-0.00598521	9.59868	0.914186	0.947042
GOPC	protein_coding	ENSG00000047932	0.408709	5.76717	1.05032e-10	4.4959e-10
USP28	protein_coding	ENSG00000048028	-0.467095	4.05225	1.92024e-12	9.26503e-12
HDAC9	protein_coding	ENSG00000048052	1.03002	1.7114	8.54108e-20	6.04836e-19
TSPAN17	protein_coding	ENSG00000048140	-0.125267	5.62773	0.0397999	0.0656324
NOP16	protein_coding	ENSG00000048162	1.45625	4.99911	2.54546e-118	1.0925e-116
CC2D2A	protein_coding	ENSG00000048342	-0.650023	4.21767	1.59459e-22	1.28149e-21
RRM2B	protein_coding	ENSG00000048392	-0.24606	6.10518	6.65419e-05	0.000170933
ZNF800	protein_coding	ENSG00000048405	1.33159	5.09982	1.46279e-115	6.11461e-114
SNX29	protein_coding	ENSG00000048471	-0.16055	5.25403	0.00428828	0.00856878
MRPS10	protein_coding	ENSG00000048544	-0.0254996	5.53846	0.666015	0.740389
RSF1	protein_coding	ENSG00000048649	0.0913395	6.21005	0.12569	0.182815
VPS13D	protein_coding	ENSG00000048707	-0.0380331	5.64884	0.57302	0.657709
CELF2	protein_coding	ENSG00000048740	-0.191561	4.14943	0.00444771	0.00886526
FAM120A	protein_coding	ENSG00000048828	0.288654	7.77209	2.62329e-08	9.42462e-08
R3HDM1	protein_coding	ENSG00000048991	-0.207967	5.377	0.000626059	0.00142279
COL9A2	protein_coding	ENSG00000049089	-0.251331	0.519008	0.122823	0.179176
KITLG	protein_coding	ENSG00000049130	1.12387	6.81048	1.73761e-84	4.9921e-83
ERCC8	protein_coding	ENSG00000049167	-0.0915608	3.32422	0.271989	0.355031
ADAMTS6	protein_coding	ENSG00000049192	1.06031	4.30736	2.08139e-53	3.69745e-52
H6PD	protein_coding	ENSG00000049239	-0.461271	6.40138	2.61328e-17	1.65405e-16
VAMP3	protein_coding	ENSG00000049245	0.131265	7.12545	0.0195544	0.0346191
PER3	protein_coding	ENSG00000049246	-0.68062	2.58012	3.46159e-14	1.86735e-13
LTBP1	protein_coding	ENSG00000049323	0.0720584	10.2778	0.170455	0.23824
RCN1	protein_coding	ENSG00000049449	-0.0405495	7.71203	0.466334	0.555857
ELN	protein_coding	ENSG00000049540	2.54339	5.3274	2.08929e-273	2.63251e-271
RFC2	protein_coding	ENSG00000049541	0.0183721	3.78722	0.818771	0.870907
ARID1B	protein_coding	ENSG00000049618	-0.0326591	5.67426	0.594565	0.677528
CLPTM1L	protein_coding	ENSG00000049656	0.139977	6.32775	0.00827793	0.0157618
NEDD4L	protein_coding	ENSG00000049759	0.00966187	4.19646	0.883788	0.924182
PPP1R3F	protein_coding	ENSG00000049769	0.432603	2.72113	4.76661e-07	1.5397e-06
HEXB	protein_coding	ENSG00000049860	0.0171003	7.36325	0.780906	0.839131
PTCD2	protein_coding	ENSG00000049883	-0.910549	3.01801	1.26996e-21	9.82548e-21
JKAMP	protein_coding	ENSG00000050130	0.0602392	5.88226	0.270321	0.353324
DKK3	protein_coding	ENSG00000050165	0.10857	9.9125	0.0447535	0.0730568
ARHGEF5	protein_coding	ENSG00000050327	0.248048	-0.73993	0.29633	0.381691
NFE2L3	protein_coding	ENSG00000050344	-0.21212	5.94759	0.000165172	0.000402881
MCUR1	protein_coding	ENSG00000050393	0.171109	4.48852	0.00561812	0.0110066
LIMA1	protein_coding	ENSG00000050405	1.02257	8.51413	3.31225e-73	8.13762e-72
LETMD1	protein_coding	ENSG00000050426	-0.521775	3.63939	3.95796e-13	1.99083e-12
SLC4A8	protein_coding	ENSG00000050438	0.138729	3.5343	0.0758505	0.116907
LAMC3	protein_coding	ENSG00000050555	0.646947	-2.63615	0.228385	0.306552
TNIP3	protein_coding	ENSG00000050730	2.01203	-1.13037	1.35286e-13	7.04171e-13
MAPK9	protein_coding	ENSG00000050748	0.165865	5.55309	0.00292664	0.0060072
BCAR1	protein_coding	ENSG00000050820	0.750162	7.58279	3.17324e-33	3.61602e-32
FAM160A2	protein_coding	ENSG00000051009	-0.42408	3.61129	1.17133e-07	3.99889e-07
HERPUD1	protein_coding	ENSG00000051108	-0.703264	6.07182	2.74337e-35	3.33285e-34
HOMER3	protein_coding	ENSG00000051128	0.352651	4.67584	4.58777e-07	1.48438e-06
POLQ	protein_coding	ENSG00000051341	-0.104347	3.10442	0.22913	0.307365
PIK3CB	protein_coding	ENSG00000051382	-0.716546	4.48027	6.12505e-28	5.9595e-27
CYBA	protein_coding	ENSG00000051523	-0.327857	3.73951	8.52766e-05	0.000216599
THOC3	protein_coding	ENSG00000051596	-0.193474	4.1476	0.0132897	0.024321
HEBP2	protein_coding	ENSG00000051620	-0.120083	5.2439	0.0342622	0.0574729
MPHOSPH9	protein_coding	ENSG00000051825	-0.82497	3.64918	4.52274e-29	4.53818e-28
PLEKHA5	protein_coding	ENSG00000052126	-0.94032	4.40848	3.17995e-37	4.04138e-36
SIKE1	protein_coding	ENSG00000052723	-0.27164	5.15685	8.6558e-06	2.45994e-05
RRP12	protein_coding	ENSG00000052749	1.30131	5.64021	2.11904e-120	9.32168e-119
FNIP2	protein_coding	ENSG00000052795	0.998017	5.36739	4.33298e-68	9.72439e-67
MSMO1	protein_coding	ENSG00000052802	-0.249558	7.297	8.91448e-06	2.53019e-05
TTC17	protein_coding	ENSG00000052841	0.324131	6.87663	8.54861e-10	3.43737e-09
FSTL4	protein_coding	ENSG00000053108	-0.983258	-1.36031	0.041017	0.0674001
FOXN3	protein_coding	ENSG00000053254	0.439057	6.88916	1.48196e-15	8.59645e-15
AKR7A2	protein_coding	ENSG00000053371	-0.229471	4.66405	0.000290094	0.000687527
MRTO4	protein_coding	ENSG00000053372	0.86866	5.86359	1.66196e-45	2.50787e-44
NNAT	protein_coding	ENSG00000053438	-0.198366	1.16812	0.103179	0.153659
USE1	protein_coding	ENSG00000053501	0.0093132	3.02562	0.902313	0.937717
NRIP2	protein_coding	ENSG00000053702	-0.565275	-3.35515	0.305754	0.391741
LAMA3	protein_coding	ENSG00000053747	0.0450055	2.44582	0.711413	0.779704
AP5M1	protein_coding	ENSG00000053770	-0.0283485	4.69769	0.638231	0.715914
ANAPC4	protein_coding	ENSG00000053900	-0.498004	3.97987	1.41303e-11	6.4011e-11
TRAPPC3	protein_coding	ENSG00000054116	0.0429476	5.59295	0.454712	0.544506
THRAP3	protein_coding	ENSG00000054118	-0.461527	7.27663	1.76053e-16	1.06574e-15
PHPT1	protein_coding	ENSG00000054148	-0.128493	5.46522	0.0523727	0.0840326
ARID4B	protein_coding	ENSG00000054267	0.161657	5.70869	0.025336	0.043705
OPN3	protein_coding	ENSG00000054277	-0.500865	5.43419	1.37938e-16	8.38755e-16
SDCCAG8	protein_coding	ENSG00000054282	-0.160906	4.53289	0.0146797	0.0266381
PTPRN	protein_coding	ENSG00000054356	0.0636112	3.39298	0.419975	0.510199
HHAT	protein_coding	ENSG00000054392	0.211069	3.17948	0.00719056	0.0138594
KIF1B	protein_coding	ENSG00000054523	0.786777	6.60797	1.3999e-46	2.16806e-45
FOXC1	protein_coding	ENSG00000054598	-0.11567	4.9628	0.0522653	0.0838832
TBC1D22A	protein_coding	ENSG00000054611	-0.0936137	4.74109	0.1258	0.182944
SYNE2	protein_coding	ENSG00000054654	-0.302912	3.5073	0.000575036	0.00131258
PLEKHH1	protein_coding	ENSG00000054690	-1.42827	-2.87769	0.0044841	0.00893377
ATP9A	protein_coding	ENSG00000054793	0.0402245	6.44352	0.44714	0.537225
CHRDL2	protein_coding	ENSG00000054938	-0.00574203	0.243078	1	1
FAM168A	protein_coding	ENSG00000054965	-0.272928	5.87385	4.79802e-07	1.54928e-06
RELT	protein_coding	ENSG00000054967	3.09179	3.86949	1.73695e-307	2.53222e-305
GALC	protein_coding	ENSG00000054983	-0.150806	4.97014	0.0259963	0.0447215
NOP58	protein_coding	ENSG00000055044	0.634665	6.2005	3.40598e-24	2.91233e-23
SZRD1	protein_coding	ENSG00000055070	0.374434	7.96329	3.61395e-11	1.59535e-10
KCNH2	protein_coding	ENSG00000055118	-0.177598	3.29598	0.0192214	0.0341043
CUL1	protein_coding	ENSG00000055130	0.371906	6.54478	1.38464e-09	5.48876e-09
FAM114A2	protein_coding	ENSG00000055147	-0.352188	4.55583	6.45494e-07	2.06053e-06
CYFIP2	protein_coding	ENSG00000055163	-0.341401	2.8952	9.23374e-05	0.000233457
TAB2	protein_coding	ENSG00000055208	0.495696	6.45916	3.50836e-21	2.66068e-20
GINM1	protein_coding	ENSG00000055211	-0.0794656	5.73999	0.226617	0.304527
EIF2AK2	protein_coding	ENSG00000055332	-0.471866	6.52147	5.3779e-13	2.67908e-12
USP36	protein_coding	ENSG00000055483	1.24798	6.01951	2.2684e-115	9.4597e-114
KMT2C	protein_coding	ENSG00000055609	0.346269	5.75321	0.000412019	0.000957451
MCOLN3	protein_coding	ENSG00000055732	1.45171	-2.1583	0.000372834	0.000872022
PUM2	protein_coding	ENSG00000055917	0.059257	6.24968	0.267149	0.349749
MRPL43	protein_coding	ENSG00000055950	-0.140278	4.97083	0.0141924	0.0258097
HPF1	protein_coding	ENSG00000056050	-0.546354	3.69553	4.8095e-13	2.40611e-12
ZFR	protein_coding	ENSG00000056097	0.228849	7.30318	1.73612e-05	4.76286e-05
ZNF280C	protein_coding	ENSG00000056277	0.237734	2.81271	0.0133732	0.0244359
TRAF1	protein_coding	ENSG00000056558	3.44388	3.99812	0	0
RC3H2	protein_coding	ENSG00000056586	0.422673	6.4991	4.89235e-14	2.61915e-13
TRAF3IP2	protein_coding	ENSG00000056972	0.320506	3.31676	0.000108512	0.000271781
GYG2	protein_coding	ENSG00000056998	-0.475884	4.38794	5.10044e-15	2.87174e-14
DCBLD2	protein_coding	ENSG00000057019	0.978	8.58981	2.90015e-78	7.69304e-77
SOAT1	protein_coding	ENSG00000057252	0.360515	6.05604	1.04436e-10	4.47475e-10
MSH4	protein_coding	ENSG00000057468	-0.423995	-3.35516	0.455381	0.545123
F7	protein_coding	ENSG00000057593	-0.638265	-2.3553	0.155346	0.220069
GDI2	protein_coding	ENSG00000057608	0.189067	8.14156	0.000419217	0.000973282
PRDM1	protein_coding	ENSG00000057657	3.54004	4.20483	0	0
ATG5	protein_coding	ENSG00000057663	0.136797	4.5578	0.0506894	0.081651
TMCC3	protein_coding	ENSG00000057704	3.74607	-0.58819	4.97083e-28	4.86061e-27
PITHD1	protein_coding	ENSG00000057757	0.566911	4.99711	1.00066e-19	7.06351e-19
MTA3	protein_coding	ENSG00000057935	-0.869526	4.24843	2.56469e-40	3.49083e-39
USP13	protein_coding	ENSG00000058056	0.329394	5.107	2.59358e-08	9.32166e-08
ATP11B	protein_coding	ENSG00000058063	0.0860524	6.29136	0.100446	0.150031
LAMC2	protein_coding	ENSG00000058085	3.53554	3.81946	4.22058e-234	4.25435e-232
CDK14	protein_coding	ENSG00000058091	0.0856779	5.22669	0.146112	0.208867
SEC61A1	protein_coding	ENSG00000058262	0.00187003	9.47736	0.971473	0.993206
PPP1R12A	protein_coding	ENSG00000058272	0.266094	7.10985	5.44979e-07	1.75204e-06
RASGRF1	protein_coding	ENSG00000058335	0.346449	-0.226154	0.0946447	0.142476
CAMK2B	protein_coding	ENSG00000058404	2.95858	0.0899886	8.64761e-28	8.36315e-27
CROCC	protein_coding	ENSG00000058453	-0.272866	3.73084	0.000541365	0.0012399
POLR3E	protein_coding	ENSG00000058600	0.0533633	4.77172	0.363336	0.452918
ATP2B4	protein_coding	ENSG00000058668	0.349304	8.81314	2.29759e-09	8.96472e-09
RIOK2	protein_coding	ENSG00000058729	0.164913	5.31835	0.0167517	0.0300579
YIPF1	protein_coding	ENSG00000058799	-0.215907	4.20494	0.00151879	0.00326367
NDC1	protein_coding	ENSG00000058804	-0.29455	4.81376	2.15377e-06	6.53915e-06
DGKG	protein_coding	ENSG00000058866	-0.446657	-0.891719	0.104487	0.155395
FLYWCH1	protein_coding	ENSG00000059122	-0.539821	4.95615	9.83379e-20	6.94984e-19
UNKL	protein_coding	ENSG00000059145	-0.110987	4.51388	0.0978997	0.146787
TBXAS1	protein_coding	ENSG00000059377	0.0697478	4.03593	0.392326	0.48288
PARP12	protein_coding	ENSG00000059378	0.349772	3.4034	1.18672e-05	3.31912e-05
ALDH18A1	protein_coding	ENSG00000059573	-0.0103336	6.89409	0.852787	0.899497
TARBP1	protein_coding	ENSG00000059588	-0.236729	3.32254	0.00276231	0.00569262
GATB	protein_coding	ENSG00000059691	-0.388102	3.75695	1.00008e-07	3.43484e-07
MXD1	protein_coding	ENSG00000059728	-1.09775	3.36612	2.13206e-49	3.5281e-48
CDK17	protein_coding	ENSG00000059758	1.50548	6.75859	3.5857e-139	1.90517e-137
DNAJC25	protein_coding	ENSG00000059769	0.0306457	3.86603	0.675742	0.748656
SLC2A3	protein_coding	ENSG00000059804	0.610077	6.96292	1.70594e-30	1.7891e-29
PSD	protein_coding	ENSG00000059915	-0.108559	1.23508	0.423064	0.513158
CTDP1	protein_coding	ENSG00000060069	0.0708152	4.95409	0.277471	0.360958
YBX3	protein_coding	ENSG00000060138	0.337242	7.61587	5.19632e-10	2.12036e-09
STYK1	protein_coding	ENSG00000060140	0.332936	-0.31183	0.237487	0.316554
WNK1	protein_coding	ENSG00000060237	-0.0364801	7.38537	0.631439	0.710052
CCAR1	protein_coding	ENSG00000060339	-0.138986	6.69198	0.0156992	0.0283453
OGFR	protein_coding	ENSG00000060491	-0.014894	5.82121	0.788884	0.846261
PIGV	protein_coding	ENSG00000060642	-0.250574	2.71827	0.00304544	0.0062351
PTPRU	protein_coding	ENSG00000060656	0.0922728	3.11187	0.235277	0.314086
SNRNP40	protein_coding	ENSG00000060688	-0.218956	4.75461	0.000564557	0.00128966
COL11A1	protein_coding	ENSG00000060718	-0.178795	5.31505	0.00426595	0.00852609
QSER1	protein_coding	ENSG00000060749	0.631685	5.88733	1.31636e-22	1.06035e-21
MPC1	protein_coding	ENSG00000060762	-0.292224	3.04516	0.000212855	0.000512526
ACAA1	protein_coding	ENSG00000060971	-0.165899	4.79897	0.0068783	0.0132924
BCAT1	protein_coding	ENSG00000060982	-0.315388	8.1417	6.02157e-09	2.27258e-08
HDAC7	protein_coding	ENSG00000061273	0.408116	6.28398	2.68174e-08	9.6287e-08
LZTS1	protein_coding	ENSG00000061337	-0.795518	4.04357	1.87996e-30	1.97044e-29
PRDM6	protein_coding	ENSG00000061455	-0.623637	0.221139	0.000645547	0.00146368
SPAG4	protein_coding	ENSG00000061656	0.459065	-0.784646	0.0733817	0.113419
NCKAP1	protein_coding	ENSG00000061676	0.25172	8.01489	2.73854e-06	8.21004e-06
MRPS35	protein_coding	ENSG00000061794	0.359575	5.27057	2.59318e-08	9.32166e-08
GUCY1B1	protein_coding	ENSG00000061918	-0.976119	2.20076	5.96846e-23	4.86748e-22
SFSWAP	protein_coding	ENSG00000061936	0.319721	5.39138	1.85094e-08	6.71685e-08
TNK2	protein_coding	ENSG00000061938	-0.381333	4.6315	1.30457e-07	4.43831e-07
MON2	protein_coding	ENSG00000061987	0.022332	6.02626	0.684684	0.75614
GPBP1	protein_coding	ENSG00000062194	0.0409847	5.54249	0.455673	0.545435
DGAT2	protein_coding	ENSG00000062282	-0.410526	-0.822318	0.106669	0.158254
ZNF112	protein_coding	ENSG00000062370	0.12936	2.77691	0.262468	0.344464
CS	protein_coding	ENSG00000062485	0.310766	7.01496	3.81656e-08	1.35298e-07
LTK	protein_coding	ENSG00000062524	0.124677	0.642668	0.427693	0.517716
MRPS24	protein_coding	ENSG00000062582	0.766693	0.374064	2.35711e-05	6.38603e-05
ELMO2	protein_coding	ENSG00000062598	-0.595534	5.26503	9.56578e-22	7.44333e-21
WAPL	protein_coding	ENSG00000062650	0.791155	6.32878	1.92783e-45	2.90409e-44
VMP1	protein_coding	ENSG00000062716	0.728661	6.86703	1.50563e-36	1.88899e-35
APPBP2	protein_coding	ENSG00000062725	-0.318016	5.74399	7.5805e-09	2.84148e-08
POLD1	protein_coding	ENSG00000062822	-0.394743	3.43978	2.19724e-07	7.33107e-07
EIF4B	protein_coding	ENSG00000063046	-0.280546	8.52799	8.79351e-07	2.78238e-06
SLC6A16	protein_coding	ENSG00000063127	-0.193999	0.48191	0.273109	0.356203
BICRA	protein_coding	ENSG00000063169	-0.00435343	4.01535	0.979989	1
SPHK2	protein_coding	ENSG00000063176	-0.590059	3.7667	3.32195e-15	1.89152e-14
RPL18	protein_coding	ENSG00000063177	0.0236334	7.8196	0.661832	0.736609
CA11	protein_coding	ENSG00000063180	-0.348149	-0.0422013	0.0681365	0.106187
ISOC2	protein_coding	ENSG00000063241	-0.113007	4.70366	0.0682928	0.106374
U2AF2	protein_coding	ENSG00000063244	0.202896	7.52942	0.000137775	0.00033972
EPN1	protein_coding	ENSG00000063245	0.0788083	7.33505	0.200028	0.273527
MED29	protein_coding	ENSG00000063322	-0.285964	5.33727	1.03115e-06	3.23485e-06
AHRR	protein_coding	ENSG00000063438	-0.96012	5.36524	1.0131e-57	1.92784e-56
ZNF275	protein_coding	ENSG00000063587	0.085607	5.14252	0.143333	0.205393
MTMR1	protein_coding	ENSG00000063601	0.0259716	5.68138	0.632583	0.711022
GPC1	protein_coding	ENSG00000063660	0.300997	8.89136	1.16583e-08	4.30505e-08
ADCK1	protein_coding	ENSG00000063761	-0.793145	1.44708	3.92818e-10	1.61635e-09
HAGH	protein_coding	ENSG00000063854	-0.129888	4.79317	0.0293591	0.0499465
RNF4	protein_coding	ENSG00000063978	0.584152	6.45362	2.75841e-27	2.63445e-26
CASP8	protein_coding	ENSG00000064012	-0.617317	3.69695	3.26579e-15	1.86134e-14
LIMCH1	protein_coding	ENSG00000064042	-0.375997	0.787553	0.0228284	0.0397644
INTS13	protein_coding	ENSG00000064102	0.332682	4.9828	3.04136e-07	1.00093e-06
TM7SF3	protein_coding	ENSG00000064115	-0.13546	5.56699	0.0158917	0.0286489
SPA17	protein_coding	ENSG00000064199	-0.196902	3.36786	0.0140878	0.0256405
WISP2	protein_coding	ENSG00000064205	-0.344986	-2.74052	0.489584	0.579226
ST3GAL6	protein_coding	ENSG00000064225	0.0458785	-2.35553	1	1
CDON	protein_coding	ENSG00000064309	-0.606108	-0.463771	0.00359541	0.00727494
TAF2	protein_coding	ENSG00000064313	0.395303	5.82974	2.20256e-12	1.05781e-11
HIPK2	protein_coding	ENSG00000064393	0.305823	8.56402	9.27378e-07	2.92542e-06
TNPO3	protein_coding	ENSG00000064419	0.109811	6.13107	0.0389604	0.0643744
RFXANK	protein_coding	ENSG00000064490	-0.303307	4.47659	8.15978e-07	2.59022e-06
TMEM161A	protein_coding	ENSG00000064545	-0.0894568	3.82711	0.194439	0.267148
LPAR2	protein_coding	ENSG00000064547	0.106634	1.10124	0.516635	0.605825
CTSA	protein_coding	ENSG00000064601	-0.0230623	7.02919	0.678043	0.750686
SUGP2	protein_coding	ENSG00000064607	-0.313209	6.26575	1.44722e-07	4.90565e-07
SLC12A2	protein_coding	ENSG00000064651	0.48471	4.60248	1.56895e-15	9.07718e-15
SNX24	protein_coding	ENSG00000064652	0.164048	4.08958	0.0161095	0.0290179
EYA2	protein_coding	ENSG00000064655	1.20374	-0.378624	7.14388e-10	2.89497e-09
CNN2	protein_coding	ENSG00000064666	0.439541	9.44243	2.68981e-13	1.37094e-12
ABCA7	protein_coding	ENSG00000064687	2.55573	1.89417	1.36409e-73	3.37011e-72
SNCAIP	protein_coding	ENSG00000064692	1.90243	2.69602	2.91273e-100	1.01342e-98
DDX20	protein_coding	ENSG00000064703	-0.162027	4.82207	0.0153454	0.0277322
BTBD1	protein_coding	ENSG00000064726	0.154151	6.91709	0.00332274	0.00675577
FAR2	protein_coding	ENSG00000064763	-0.275949	1.55618	0.0273724	0.0468286
SBNO2	protein_coding	ENSG00000064932	0.777797	6.37369	1.23263e-43	1.79699e-42
PMS1	protein_coding	ENSG00000064933	-0.873954	3.95639	2.9637e-34	3.50635e-33
HMG20B	protein_coding	ENSG00000064961	-0.0353376	5.71957	0.517505	0.606684
CALCRL	protein_coding	ENSG00000064989	-1.39181	-0.545422	4.99491e-09	1.89525e-08
TAF11	protein_coding	ENSG00000064995	0.358475	4.241	3.72158e-07	1.21572e-06
ANKS1A	protein_coding	ENSG00000064999	-0.71715	4.23765	6.41162e-26	5.84501e-25
AP3D1	protein_coding	ENSG00000065000	0.136968	7.87677	0.00784658	0.0150058
ZNF76	protein_coding	ENSG00000065029	-0.573251	3.26	6.43777e-12	2.99321e-11
SLC9A3R2	protein_coding	ENSG00000065054	0.0600317	6.29468	0.275296	0.358604
NTHL1	protein_coding	ENSG00000065057	-0.609671	2.78725	1.01935e-10	4.36969e-10
UHRF1BP1	protein_coding	ENSG00000065060	-1.21009	4.04682	1.39501e-64	2.98641e-63
GNAI3	protein_coding	ENSG00000065135	0.475339	6.95398	9.49203e-18	6.1536e-17
IPO5	protein_coding	ENSG00000065150	0.542439	7.77445	2.24005e-24	1.93225e-23
OAT	protein_coding	ENSG00000065154	-0.00385411	6.63723	0.952102	0.977776
WDR3	protein_coding	ENSG00000065183	0.581916	5.89824	3.74451e-17	2.35148e-16
PKN2	protein_coding	ENSG00000065243	-0.498218	5.82114	6.4052e-18	4.18783e-17
WDR18	protein_coding	ENSG00000065268	0.0103684	4.02633	0.895297	0.932492
TRAM2	protein_coding	ENSG00000065308	-0.365411	8.58641	5.76596e-11	2.51575e-10
NTN1	protein_coding	ENSG00000065320	0.441365	-0.546685	0.0283661	0.0483925
GLP2R	protein_coding	ENSG00000065325	0.439147	-2.95783	0.472013	0.561753
MCM10	protein_coding	ENSG00000065328	0.114834	3.26775	0.155004	0.219673
DGKA	protein_coding	ENSG00000065357	-0.316552	5.52084	1.6986e-08	6.18822e-08
ERBB3	protein_coding	ENSG00000065361	-1.06202	-1.2429	0.000149322	0.000366245
ANKRD44	protein_coding	ENSG00000065413	0.609878	3.22439	7.52826e-15	4.20648e-14
KARS	protein_coding	ENSG00000065427	0.0701321	6.86292	0.193713	0.266316
ADAT1	protein_coding	ENSG00000065457	-0.480804	3.82608	4.05532e-12	1.91119e-11
PDIA5	protein_coding	ENSG00000065485	0.133129	4.8257	0.0323178	0.0544546
TBC1D22B	protein_coding	ENSG00000065491	-0.167537	3.54126	0.0211784	0.0371728
NDUFB4	protein_coding	ENSG00000065518	0.0851439	5.67476	0.254035	0.334866
SPEN	protein_coding	ENSG00000065526	1.23974	6.3922	1.04404e-21	8.10599e-21
MYLK	protein_coding	ENSG00000065534	-0.229474	10.1135	1.20089e-05	3.35451e-05
ZC3H15	protein_coding	ENSG00000065548	0.337495	6.33613	1.73711e-07	5.84387e-07
MAP2K4	protein_coding	ENSG00000065559	0.403633	5.38609	6.23116e-12	2.89867e-11
TMEM206	protein_coding	ENSG00000065600	0.576401	3.74294	1.15562e-14	6.39034e-14
SLK	protein_coding	ENSG00000065613	0.610961	6.72104	3.41022e-25	3.02749e-24
CYB5R4	protein_coding	ENSG00000065615	0.351897	4.73438	1.86353e-08	6.76113e-08
COL17A1	protein_coding	ENSG00000065618	-0.262118	-2.05833	0.756579	0.818727
GSTO2	protein_coding	ENSG00000065621	2.06889	1.70449	4.82898e-47	7.53167e-46
SEC61A2	protein_coding	ENSG00000065665	-0.368341	3.04181	4.56094e-06	1.33513e-05
TLE2	protein_coding	ENSG00000065717	0.292788	-0.369959	0.139817	0.201041
ASB1	protein_coding	ENSG00000065802	0.402363	6.66624	2.96468e-13	1.50842e-12
FAM107B	protein_coding	ENSG00000065809	0.767117	7.14353	4.52467e-36	5.61288e-35
ME1	protein_coding	ENSG00000065833	0.659602	6.43268	1.22271e-34	1.4603e-33
TBC1D1	protein_coding	ENSG00000065882	0.442656	5.74216	1.26744e-13	6.61077e-13
CDK13	protein_coding	ENSG00000065883	0.22844	6.07876	1.22151e-05	3.40886e-05
MTHFD2	protein_coding	ENSG00000065911	-0.17765	7.12094	0.000793345	0.00177349
SLC9A7	protein_coding	ENSG00000065923	-0.411861	5.86138	6.85025e-13	3.39529e-12
FOXJ2	protein_coding	ENSG00000065970	-0.210116	5.30097	0.000274288	0.000651818
YBX1	protein_coding	ENSG00000065978	0.129686	9.70527	0.0200313	0.0353862
PDE4A	protein_coding	ENSG00000065989	0.261057	4.73743	0.000310157	0.000733105
PPP2R5A	protein_coding	ENSG00000066027	-0.190561	4.91048	0.00352585	0.00714486
ELAVL1	protein_coding	ENSG00000066044	0.254434	6.30165	3.24247e-06	9.64051e-06
TIE1	protein_coding	ENSG00000066056	1.56591	-1.45797	2.37895e-05	6.44024e-05
DIP2B	protein_coding	ENSG00000066084	0.443488	5.77645	3.03054e-15	1.73062e-14
SMARCD1	protein_coding	ENSG00000066117	0.02304	5.6889	0.697155	0.767032
KDM4A	protein_coding	ENSG00000066135	-1.0452	4.29373	4.49005e-52	7.84979e-51
NFYC	protein_coding	ENSG00000066136	-0.0126852	4.18216	0.855865	0.901987
NGEF	protein_coding	ENSG00000066248	3.41051	-0.44517	1.87571e-38	2.45275e-37
ASPM	protein_coding	ENSG00000066279	-0.622541	5.17325	8.24109e-22	6.44383e-21
ELOVL1	protein_coding	ENSG00000066322	-0.0115847	6.65368	0.832947	0.882898
ZNRD1	protein_coding	ENSG00000066379	0.182218	2.28238	0.0603075	0.095359
ZBTB11	protein_coding	ENSG00000066422	0.322631	5.04139	5.30613e-07	1.70834e-06
ATXN3	protein_coding	ENSG00000066427	0.137987	3.2329	0.0764575	0.117719
GOLGA5	protein_coding	ENSG00000066455	-0.345927	6.06238	2.50229e-08	9.0009e-08
LRRC40	protein_coding	ENSG00000066557	-0.082976	4.40989	0.242892	0.322515
ISOC1	protein_coding	ENSG00000066583	-0.0496592	4.21268	0.488012	0.577638
EML1	protein_coding	ENSG00000066629	0.042557	5.86397	0.481898	0.571744
TRMT11	protein_coding	ENSG00000066651	-0.0472241	3.38051	0.546576	0.633274
THUMPD1	protein_coding	ENSG00000066654	0.202735	5.44675	0.00105132	0.00231181
MSANTD3	protein_coding	ENSG00000066697	0.883294	5.52133	4.89344e-44	7.18737e-43
ATG2B	protein_coding	ENSG00000066739	-0.233295	5.23053	0.000125703	0.000311959
ARFGEF1	protein_coding	ENSG00000066777	0.297173	6.22492	1.93196e-08	7.00076e-08
ZFAT	protein_coding	ENSG00000066827	-0.411489	3.02122	2.06359e-07	6.89426e-07
MTFR1	protein_coding	ENSG00000066855	-0.294134	4.2346	5.11754e-06	1.48917e-05
STAG3	protein_coding	ENSG00000066923	-0.635158	-2.58294	0.218712	0.295434
FECH	protein_coding	ENSG00000066926	-0.174307	4.4706	0.00942333	0.0177556
MYO9A	protein_coding	ENSG00000066933	-0.451464	4.99242	7.39472e-12	3.4219e-11
PFKP	protein_coding	ENSG00000067057	0.602541	8.13181	3.12532e-24	2.67755e-23
IDI1	protein_coding	ENSG00000067064	0.108987	7.12917	0.0957658	0.143979
SP100	protein_coding	ENSG00000067066	0.00671597	5.89769	0.911778	0.945436
KLF6	protein_coding	ENSG00000067082	1.93734	8.29343	5.94017e-285	8.12284e-283
PLPP1	protein_coding	ENSG00000067113	-0.195753	3.92778	0.00349991	0.00709718
NEO1	protein_coding	ENSG00000067141	-0.187843	7.84853	0.000366412	0.000858025
TRAM1	protein_coding	ENSG00000067167	-0.120235	9.73389	0.0652702	0.102235
PHKA1	protein_coding	ENSG00000067177	0.395058	3.21169	3.85763e-06	1.13908e-05
TNFRSF1A	protein_coding	ENSG00000067182	0.105343	7.42412	0.058062	0.0922549
CACNB1	protein_coding	ENSG00000067191	-0.0805211	2.91959	0.370996	0.460512
EVI5	protein_coding	ENSG00000067208	-0.0256424	5.7436	0.644966	0.722087
STOML1	protein_coding	ENSG00000067221	-0.509842	3.60323	4.30062e-12	2.02301e-11
PKM	protein_coding	ENSG00000067225	0.0603231	11.0297	0.255146	0.33608
DHX29	protein_coding	ENSG00000067248	-0.0653291	6.34898	0.27971	0.363254
DNTTIP2	protein_coding	ENSG00000067334	0.765634	6.02246	4.29912e-28	4.20846e-27
METTL22	protein_coding	ENSG00000067365	-0.0928308	4.00607	0.165256	0.232169
TP53BP1	protein_coding	ENSG00000067369	-0.198559	6.45619	0.000201357	0.000486566
TRO	protein_coding	ENSG00000067445	-0.451663	4.73658	1.06634e-13	5.585e-13
RRP15	protein_coding	ENSG00000067533	0.223818	5.22187	0.0035363	0.00716192
RHOA	protein_coding	ENSG00000067560	0.228733	9.13086	1.41563e-05	3.9276e-05
DHX8	protein_coding	ENSG00000067596	-0.0663759	5.43134	0.236378	0.315266
PMS2P4	transcribed_unprocessed_pseudogene	ENSG00000067601	-0.120238	-0.292955	0.615888	0.696427
PRKCZ	protein_coding	ENSG00000067606	-0.449226	-0.747143	0.047155	0.0764746
IARS2	protein_coding	ENSG00000067704	-0.240161	6.45737	6.59119e-05	0.000169364
SYT1	protein_coding	ENSG00000067715	0.102787	3.02977	0.206806	0.281617
NAV3	protein_coding	ENSG00000067798	1.77083	7.60352	2.93845e-206	2.54089e-204
IDH3G	protein_coding	ENSG00000067829	0.083054	5.26061	0.1398	0.201033
ROGDI	protein_coding	ENSG00000067836	-0.175989	0.939881	0.227491	0.305538
PDZD4	protein_coding	ENSG00000067840	1.02356	-1.19096	0.00020798	0.000501746
ATP2B3	protein_coding	ENSG00000067842	3.25703	-2.90154	1.45518e-11	6.58357e-11
ROCK1	protein_coding	ENSG00000067900	0.398474	7.41965	3.81487e-12	1.80172e-11
CBFB	protein_coding	ENSG00000067955	2.21066	6.79631	1.08694442085074e-322	1.65314365098481e-320
PDK3	protein_coding	ENSG00000067992	-0.330659	-1.01814	0.222446	0.299721
HYAL2	protein_coding	ENSG00000068001	0.00902564	4.27819	0.895191	0.932492
HDAC4	protein_coding	ENSG00000068024	-0.0384432	4.43127	0.566199	0.651135
RASSF1	protein_coding	ENSG00000068028	0.336719	4.86437	2.71985e-08	9.76156e-08
FGFR3	protein_coding	ENSG00000068078	1.95951	0.551646	1.68548e-29	1.71266e-28
IFI35	protein_coding	ENSG00000068079	-0.0671912	2.93352	0.431328	0.521353
HEATR6	protein_coding	ENSG00000068097	-1.26679	4.12094	3.51807e-85	1.02576e-83
COASY	protein_coding	ENSG00000068120	-0.0964286	5.4258	0.110507	0.163412
PLEKHH3	protein_coding	ENSG00000068137	0.233329	3.52477	0.00176993	0.00376526
MEF2A	protein_coding	ENSG00000068305	1.22964	6.68955	5.54422e-114	2.27972e-112
OTUD5	protein_coding	ENSG00000068308	0.334153	5.92799	1.31206e-09	5.21043e-09
TFE3	protein_coding	ENSG00000068323	0.0822776	7.12702	0.141452	0.20316
TBC1D25	protein_coding	ENSG00000068354	-0.0621852	3.594	0.413297	0.503875
ACSL4	protein_coding	ENSG00000068366	0.922356	7.93752	1.19596e-51	2.07236e-50
INPP5A	protein_coding	ENSG00000068383	0.547313	4.93098	2.57916e-19	1.79827e-18
GPKOW	protein_coding	ENSG00000068394	-0.24336	4.2713	0.0010017	0.0022104
GRIPAP1	protein_coding	ENSG00000068400	-0.148668	5.03914	0.00954596	0.0179751
FTSJ1	protein_coding	ENSG00000068438	0.395218	5.48987	4.13899e-12	1.94906e-11
PRR11	protein_coding	ENSG00000068489	0.00849156	4.96335	0.887659	0.926956
REEP1	protein_coding	ENSG00000068615	1.98682	-3.50801	0.00507435	0.0100181
ATP11A	protein_coding	ENSG00000068650	0.471604	6.34256	2.68187e-16	1.60967e-15
POLR1A	protein_coding	ENSG00000068654	-0.0796427	6.22206	0.162704	0.229243
LAPTM4A	protein_coding	ENSG00000068697	-0.157157	8.37347	0.00592161	0.0115588
TTC7A	protein_coding	ENSG00000068724	0.476442	4.78763	3.83043e-15	2.17263e-14
IP6K2	protein_coding	ENSG00000068745	0.0855813	5.4504	0.141834	0.203576
SRBD1	protein_coding	ENSG00000068784	-0.911812	3.53593	1.40319e-30	1.47422e-29
KIF2A	protein_coding	ENSG00000068796	-0.170966	5.50696	0.00277514	0.00571819
RASGRP2	protein_coding	ENSG00000068831	0.409992	-0.983655	0.180652	0.250822
PSME4	protein_coding	ENSG00000068878	0.793382	7.12016	9.03793e-50	1.50405e-48
IFT80	protein_coding	ENSG00000068885	-0.343972	3.30623	3.01652e-06	9.00971e-06
SIRT2	protein_coding	ENSG00000068903	-0.0375021	5.05803	0.54357	0.630537
ERLEC1	protein_coding	ENSG00000068912	-0.106869	6.76194	0.0704069	0.109252
PPP2R5B	protein_coding	ENSG00000068971	-0.192942	4.50335	0.00389811	0.00784603
PITX1	protein_coding	ENSG00000069011	-0.688748	5.53031	7.31958e-32	7.99984e-31
MAST4	protein_coding	ENSG00000069020	0.185105	4.6792	0.0106656	0.0198838
NUP133	protein_coding	ENSG00000069248	-0.331784	5.10959	7.62416e-08	2.6412e-07
NUCKS1	protein_coding	ENSG00000069275	-0.350854	8.18178	1.03226e-08	3.82706e-08
VPS35	protein_coding	ENSG00000069329	-0.133878	6.64542	0.0191837	0.0340457
DNAJA2	protein_coding	ENSG00000069345	0.728554	6.55001	3.3273e-32	3.67985e-31
BCL3	protein_coding	ENSG00000069399	0.15883	4.43485	0.0388037	0.0641396
KCNAB2	protein_coding	ENSG00000069424	-0.209624	1.23094	0.102685	0.152987
ABCC9	protein_coding	ENSG00000069431	-0.201768	2.23778	0.0567938	0.0904434
GAL	protein_coding	ENSG00000069482	2.54452	2.75207	4.46542e-140	2.38697e-138
CLEC2D	protein_coding	ENSG00000069493	-1.23879	0.741886	1.9806e-15	1.14101e-14
FUNDC1	protein_coding	ENSG00000069509	-0.119374	2.90324	0.19696	0.270061
RORA	protein_coding	ENSG00000069667	-0.407937	2.57432	2.09033e-06	6.35419e-06
DRD4	protein_coding	ENSG00000069696	-0.60329	-2.75224	0.280491	0.364001
TGFBR3	protein_coding	ENSG00000069702	-1.37227	3.86596	1.61359e-75	4.13117e-74
ATP1B3	protein_coding	ENSG00000069849	0.594905	7.35252	9.57244e-21	7.07702e-20
NEDD4	protein_coding	ENSG00000069869	0.197811	7.11684	0.000430165	0.000997517
PIGB	protein_coding	ENSG00000069943	-0.22127	3.02302	0.00800749	0.0152953
MAPK6	protein_coding	ENSG00000069956	0.455854	6.7247	6.55547e-14	3.48624e-13
GNB5	protein_coding	ENSG00000069966	-0.223686	4.53618	0.000209718	0.000505387
RAB27A	protein_coding	ENSG00000069974	-0.238269	4.10222	0.000585575	0.00133532
HDHD5	protein_coding	ENSG00000069998	-0.464503	3.48476	6.088e-09	2.29618e-08
UFD1	protein_coding	ENSG00000070010	0.241702	5.82848	1.31337e-05	3.65423e-05
LRP6	protein_coding	ENSG00000070018	-0.26146	6.4932	2.19043e-06	6.64486e-06
PHRF1	protein_coding	ENSG00000070047	0.665969	6.52334	3.4357e-35	4.16248e-34
ELP1	protein_coding	ENSG00000070061	-0.081352	5.59066	0.148288	0.211464
NUCB2	protein_coding	ENSG00000070081	-0.0128874	7.11837	0.828229	0.878989
PFN2	protein_coding	ENSG00000070087	-0.0874466	7.15479	0.1138	0.167642
PTPN3	protein_coding	ENSG00000070159	0.694989	-0.453927	0.00118247	0.00258313
SPTB	protein_coding	ENSG00000070182	-0.509438	-2.52034	0.368608	0.457975
SLC44A1	protein_coding	ENSG00000070214	-0.211642	4.8736	0.00118836	0.00259471
TMEM260	protein_coding	ENSG00000070269	-0.246746	4.50002	3.21227e-05	8.56217e-05
SMG6	protein_coding	ENSG00000070366	-0.172968	5.84742	0.00291449	0.00598505
EXOC5	protein_coding	ENSG00000070367	0.18854	6.78121	0.000875466	0.00194695
CLTCL1	protein_coding	ENSG00000070371	-0.901647	3.23204	7.45768e-29	7.42402e-28
FGF22	protein_coding	ENSG00000070388	0.0584921	-3.44908	1	1
FSTL3	protein_coding	ENSG00000070404	1.16328	7.42625	1.16614e-103	4.24138e-102
DGCR2	protein_coding	ENSG00000070413	-0.424807	5.93459	1.3315e-13	6.93465e-13
RNF126	protein_coding	ENSG00000070423	0.771277	5.07084	6.68125e-38	8.65325e-37
MNT	protein_coding	ENSG00000070444	-0.513327	4.41395	2.61511e-12	1.25117e-11
ZXDC	protein_coding	ENSG00000070476	-0.315155	4.05433	2.70589e-06	8.11905e-06
JMJD6	protein_coding	ENSG00000070495	1.35068	5.78397	7.5021e-119	3.25152e-117
POLB	protein_coding	ENSG00000070501	-0.475459	3.01208	6.99552e-05	0.000179128
WIPI1	protein_coding	ENSG00000070540	-0.319598	5.77902	8.68422e-09	3.24005e-08
GBA2	protein_coding	ENSG00000070610	0.290151	5.06281	1.88429e-06	5.75564e-06
NDST1	protein_coding	ENSG00000070614	-0.218947	8.12485	4.87472e-05	0.000127468
ASNS	protein_coding	ENSG00000070669	-1.48153	0.615412	6.91249e-21	5.14499e-20
AP3M2	protein_coding	ENSG00000070718	0.263808	4.47416	2.39776e-05	6.4852e-05
ST6GALNAC2	protein_coding	ENSG00000070731	-0.688349	-2.1671	0.0828088	0.12645
PABPC1	protein_coding	ENSG00000070756	0.202772	9.948	0.000294367	0.000696998
TESK2	protein_coding	ENSG00000070759	-0.716513	0.341006	1.01845e-05	2.87125e-05
CFAP20	protein_coding	ENSG00000070761	-0.0211048	4.58216	0.766541	0.827122
CSNK2A2	protein_coding	ENSG00000070770	0.770699	6.10573	1.14635e-42	1.64536e-41
PTPN21	protein_coding	ENSG00000070778	0.0786544	6.65385	0.137452	0.198126
EIF2B3	protein_coding	ENSG00000070785	-0.0886152	4.57345	0.200259	0.2738
CAMK2A	protein_coding	ENSG00000070808	1.65955	-0.953817	1.90928e-09	7.48936e-09
TCOF1	protein_coding	ENSG00000070814	0.228742	6.04459	2.90258e-05	7.77428e-05
CDC42	protein_coding	ENSG00000070831	0.675154	-0.291073	0.00183252	0.00389091
OSBPL3	protein_coding	ENSG00000070882	-0.0335282	5.53271	0.560334	0.645821
RAD18	protein_coding	ENSG00000070950	0.456451	3.99028	2.62856e-11	1.17238e-10
ATP2B1	protein_coding	ENSG00000070961	0.202852	7.17017	0.000245782	0.0005874
NCK2	protein_coding	ENSG00000071051	0.13998	5.23385	0.019425	0.034424
MAP4K4	protein_coding	ENSG00000071054	0.517533	8.81433	2.12002e-21	1.6288e-20
RPL31	protein_coding	ENSG00000071082	0.0953815	7.16764	0.289277	0.373889
WDR1	protein_coding	ENSG00000071127	0.474941	10.0263	5.22205e-18	3.42952e-17
SNX13	protein_coding	ENSG00000071189	-0.33765	5.14717	5.10074e-08	1.7913e-07
ARHGAP10	protein_coding	ENSG00000071205	0.12996	5.51663	0.0284783	0.0485698
RPS6KA2	protein_coding	ENSG00000071242	-0.309348	7.03431	3.11484e-08	1.11069e-07
ING3	protein_coding	ENSG00000071243	-0.0254034	3.05234	0.762361	0.823619
VASH1	protein_coding	ENSG00000071246	-0.294306	3.58548	0.00019703	0.00047696
LMCD1	protein_coding	ENSG00000071282	2.13118	5.97698	3.14402e-189	2.43248e-187
BUD23	protein_coding	ENSG00000071462	0.136294	5.68053	0.0218941	0.0382957
SEL1L	protein_coding	ENSG00000071537	-0.0726179	7.68668	0.166511	0.233653
TRIP13	protein_coding	ENSG00000071539	-0.0905429	3.92481	0.221912	0.299116
ATP6AP1	protein_coding	ENSG00000071553	-0.0636591	6.63736	0.234047	0.312667
TCF3	protein_coding	ENSG00000071564	0.309134	6.82104	3.92165e-09	1.50028e-08
TRIB2	protein_coding	ENSG00000071575	-1.45891	4.4085	2.15325e-90	6.56016e-89
DAZAP1	protein_coding	ENSG00000071626	0.300123	7.14492	1.59467e-08	5.81921e-08
MBD3	protein_coding	ENSG00000071655	0.147231	5.18891	0.0208505	0.0366718
HLTF	protein_coding	ENSG00000071794	-0.577035	5.23836	1.60287e-19	1.12469e-18
FAM50A	protein_coding	ENSG00000071859	0.133897	6.3109	0.0216466	0.0379154
FAM3A	protein_coding	ENSG00000071889	-0.154665	4.72019	0.0139946	0.0254867
CPSF1	protein_coding	ENSG00000071894	-0.24752	5.93077	2.685e-05	7.22114e-05
CYBRD1	protein_coding	ENSG00000071967	-0.00440717	7.71961	0.936308	0.96565
PDCD2	protein_coding	ENSG00000071994	0.292127	5.37514	9.45127e-07	2.97768e-06
SLC6A15	protein_coding	ENSG00000072041	-0.399505	0.94288	0.014853	0.0269278
RDH11	protein_coding	ENSG00000072042	-0.0633561	6.18278	0.326322	0.414511
PRKACA	protein_coding	ENSG00000072062	0.250091	6.42102	5.12487e-05	0.000133633
ADGRL1	protein_coding	ENSG00000072071	0.0979744	1.13002	0.48271	0.572553
ACTN1	protein_coding	ENSG00000072110	0.554237	10.6603	9.57191e-25	8.37958e-24
ZFYVE26	protein_coding	ENSG00000072121	-0.871962	4.16229	8.10992e-36	1.00181e-34
RPS6KA6	protein_coding	ENSG00000072133	0.643552	3.925	6.54883e-17	4.05338e-16
EPN2	protein_coding	ENSG00000072134	0.401789	6.12667	6.33934e-14	3.37537e-13
PTPN18	protein_coding	ENSG00000072135	-0.129031	3.79754	0.108312	0.160503
LIMS2	protein_coding	ENSG00000072163	0.0183563	5.51155	0.829521	0.880113
SPEG	protein_coding	ENSG00000072195	-0.528342	5.74402	3.85108e-13	1.93983e-12
LNX1	protein_coding	ENSG00000072201	-0.410974	-0.394578	0.036275	0.0603899
ALDH3A2	protein_coding	ENSG00000072210	-0.747288	2.04415	2.56741e-12	1.22934e-11
TFRC	protein_coding	ENSG00000072274	0.186315	8.18807	0.00106951	0.00235035
SREBF1	protein_coding	ENSG00000072310	-0.455598	5.25491	8.20362e-10	3.30543e-09
TRPC5	protein_coding	ENSG00000072315	-0.151992	-0.486209	0.458305	0.547842
AFF4	protein_coding	ENSG00000072364	0.840594	7.83528	2.01898e-48	3.26442e-47
UBE2D1	protein_coding	ENSG00000072401	0.289801	4.40339	3.78855e-06	1.11962e-05
MPP5	protein_coding	ENSG00000072415	-1.01467	6.12115	1.24237e-61	2.53358e-60
RHOBTB1	protein_coding	ENSG00000072422	-1.0221	5.08191	1.55459e-61	3.15934e-60
SMC1A	protein_coding	ENSG00000072501	-0.075958	6.99718	0.152303	0.216332
HSD17B10	protein_coding	ENSG00000072506	0.12298	5.00244	0.0517479	0.083169
MARK2	protein_coding	ENSG00000072518	0.485328	5.27093	3.56606e-16	2.12806e-15
HMMR	protein_coding	ENSG00000072571	-0.84551	3.92535	1.10357e-30	1.16499e-29
CHFR	protein_coding	ENSG00000072609	0.212162	4.98344	0.000252564	0.000602874
TRHDE	protein_coding	ENSG00000072657	0.0404385	7.67296	0.458663	0.548196
P4HA2	protein_coding	ENSG00000072682	0.386915	7.16029	1.01277e-12	4.96669e-12
NFATC3	protein_coding	ENSG00000072736	-0.734121	4.02268	3.82592e-29	3.84773e-28
TRNT1	protein_coding	ENSG00000072756	0.187197	4.51058	0.0148943	0.0269915
ACADVL	protein_coding	ENSG00000072778	0.43416	7.28151	1.87178e-11	8.40802e-11
STK10	protein_coding	ENSG00000072786	0.680492	6.15627	1.19419e-37	1.53427e-36
FBXW11	protein_coding	ENSG00000072803	0.0412047	6.40491	0.47247	0.562184
ACAP1	protein_coding	ENSG00000072818	0.414618	-1.795	0.331886	0.420368
CRMP1	protein_coding	ENSG00000072832	0.811825	-1.61259	0.0106937	0.0199321
EVC	protein_coding	ENSG00000072840	-0.136539	6.18502	0.0117797	0.0217495
DERL2	protein_coding	ENSG00000072849	-0.0180324	5.3157	0.750962	0.813596
NDE1	protein_coding	ENSG00000072864	-0.875001	4.65517	3.32812e-47	5.24179e-46
MRVI1	protein_coding	ENSG00000072952	-0.757079	6.12044	4.42178e-45	6.60459e-44
TMEM38A	protein_coding	ENSG00000072954	0.121765	0.165912	0.494556	0.583855
AP1M1	protein_coding	ENSG00000072958	-0.116493	6.10189	0.0308446	0.0522118
PVR	protein_coding	ENSG00000073008	0.601483	8.72703	1.07933e-30	1.14145e-29
XRCC1	protein_coding	ENSG00000073050	-0.164574	4.10926	0.0267842	0.0459202
SCARB1	protein_coding	ENSG00000073060	-0.0135145	4.94162	0.822955	0.874624
MCM2	protein_coding	ENSG00000073111	-0.640978	4.41958	2.27076e-20	1.65248e-19
MOV10L1	protein_coding	ENSG00000073146	-1.1087	0.450054	1.32183e-09	5.24449e-09
PANX2	protein_coding	ENSG00000073150	0.703282	1.17032	5.09751e-08	1.79052e-07
SELENOO	protein_coding	ENSG00000073169	-0.153503	4.04762	0.0255357	0.0439978
ALPK1	protein_coding	ENSG00000073331	-1.2982	3.20891	1.22175e-48	1.98085e-47
LLGL2	protein_coding	ENSG00000073350	-0.934468	-3.16772	0.191533	0.263791
PDE8A	protein_coding	ENSG00000073417	0.605934	5.60417	1.54748e-24	1.34272e-23
CLCN4	protein_coding	ENSG00000073464	-0.58162	2.30313	1.91123e-09	7.49534e-09
NLE1	protein_coding	ENSG00000073536	0.144189	4.02981	0.0374746	0.0621874
SDHA	protein_coding	ENSG00000073578	-0.160589	6.24455	0.00319619	0.006518
SMARCE1	protein_coding	ENSG00000073584	-0.214775	2.53921	0.0162249	0.0292107
GSDMB	protein_coding	ENSG00000073605	0.168854	2.91964	0.138681	0.199668
KDM5A	protein_coding	ENSG00000073614	0.159637	5.89163	0.00621628	0.0120925
ADAM11	protein_coding	ENSG00000073670	0.394229	-1.21931	0.190389	0.262441
PPP2R3A	protein_coding	ENSG00000073711	0.341194	6.2156	2.65361e-10	1.10661e-09
FERMT2	protein_coding	ENSG00000073712	1.30861	8.65647	9.22201e-121	4.0771e-119
PTGS2	protein_coding	ENSG00000073756	8.27762	6.60938	0	0
IGF2BP2	protein_coding	ENSG00000073792	0.275282	7.52907	9.7213e-08	3.34211e-07
MAP3K13	protein_coding	ENSG00000073803	0.239967	3.76452	0.000557773	0.00127516
ST6GAL1	protein_coding	ENSG00000073849	-0.810964	-0.0540541	3.60627e-06	1.06736e-05
VDAC1P1	processed_pseudogene	ENSG00000073905	-0.441977	-2.05927	0.278838	0.362416
FRY	protein_coding	ENSG00000073910	-1.28726	4.97699	3.5088e-93	1.10924e-91
PICALM	protein_coding	ENSG00000073921	1.11539	8.77465	1.10195e-78	2.94077e-77
NSF	protein_coding	ENSG00000073969	-0.222586	5.25596	0.00031613	0.000746524
GLI2	protein_coding	ENSG00000074047	1.79055	6.27532	6.59602e-129	3.18778e-127
CLASP1	protein_coding	ENSG00000074054	-0.39278	5.9914	1.22185e-11	5.55788e-11
MRPS34	protein_coding	ENSG00000074071	-0.137556	5.80017	0.110345	0.163228
NOTCH3	protein_coding	ENSG00000074181	0.255449	6.6234	2.5544e-05	6.88565e-05
CLNS1A	protein_coding	ENSG00000074201	-0.189713	5.65597	0.00430043	0.0085921
TEAD2	protein_coding	ENSG00000074219	-0.107547	4.96087	0.0818437	0.125101
EED	protein_coding	ENSG00000074266	-0.210049	3.16791	0.0132373	0.0242353
SNCB	protein_coding	ENSG00000074317	-0.361036	-2.22404	0.413903	0.504439
TSG101	protein_coding	ENSG00000074319	-0.125121	5.76575	0.0293465	0.0499298
NCBP3	protein_coding	ENSG00000074356	0.184691	5.77427	0.000754404	0.00169266
ATP2A3	protein_coding	ENSG00000074370	-0.310422	0.952421	0.0246601	0.0426434
CA12	protein_coding	ENSG00000074410	-0.284789	2.40231	0.00407482	0.0081756
MGLL	protein_coding	ENSG00000074416	0.216824	8.38126	0.000104105	0.000261226
NTN4	protein_coding	ENSG00000074527	-0.41449	7.25577	6.18268e-14	3.29593e-13
BCS1L	protein_coding	ENSG00000074582	-0.181901	3.55145	0.0440172	0.0719547
NUAK1	protein_coding	ENSG00000074590	0.400658	5.13545	3.02532e-12	1.43845e-11
DPP8	protein_coding	ENSG00000074603	0.259909	6.08426	4.50853e-06	1.32045e-05
SLC24A1	protein_coding	ENSG00000074621	-0.860405	2.78652	9.78804e-24	8.23372e-23
ZNF532	protein_coding	ENSG00000074657	-0.21084	6.16183	7.92779e-05	0.000202002
SCARF1	protein_coding	ENSG00000074660	0.360566	-1.34591	0.260655	0.342313
LMAN1	protein_coding	ENSG00000074695	0.0358951	8.59588	0.562716	0.648143
HACD3	protein_coding	ENSG00000074696	-0.307436	6.69429	2.96012e-07	9.74552e-07
IPCEF1	protein_coding	ENSG00000074706	-2.28206	-1.62173	4.3885e-13	2.19799e-12
ZZEF1	protein_coding	ENSG00000074755	-0.123445	5.64668	0.0595288	0.0942882
ENO1	protein_coding	ENSG00000074800	0.119037	10.1658	0.0310011	0.0524415
MYDGF	protein_coding	ENSG00000074842	0.170398	7.77485	0.00548185	0.0107588
ANO8	protein_coding	ENSG00000074855	0.0141232	3.4988	0.848921	0.896393
TUBE1	protein_coding	ENSG00000074935	-0.639392	3.52138	4.63875e-17	2.89963e-16
ARHGEF10L	protein_coding	ENSG00000074964	-0.15923	4.01891	0.0272694	0.0466795
ACTR6	protein_coding	ENSG00000075089	-0.1074	3.63729	0.197532	0.270722
TIPIN	protein_coding	ENSG00000075131	0.069499	2.90134	0.479467	0.569319
SRI	protein_coding	ENSG00000075142	0.115472	5.249	0.0576267	0.0916127
EIF4G3	protein_coding	ENSG00000075151	-0.0878928	7.52448	0.0881839	0.133823
NUP37	protein_coding	ENSG00000075188	-0.421685	3.52386	6.82198e-08	2.37684e-07
SEMA3A	protein_coding	ENSG00000075213	-0.475925	7.16893	1.02813e-18	6.97544e-18
GTSE1	protein_coding	ENSG00000075218	-0.337316	4.0967	2.29495e-06	6.94627e-06
SEMA3C	protein_coding	ENSG00000075223	0.822438	6.37015	1.28967e-45	1.94942e-44
TTC38	protein_coding	ENSG00000075234	-0.296357	4.1457	9.17049e-06	2.59826e-05
ACAT1	protein_coding	ENSG00000075239	-0.117245	5.38314	0.0658486	0.102949
GRAMD4	protein_coding	ENSG00000075240	-0.0458204	3.66006	0.524429	0.612643
CELSR1	protein_coding	ENSG00000075275	0.319514	-0.27102	0.119818	0.175358
ZNF638	protein_coding	ENSG00000075292	-0.0341813	6.32976	0.559418	0.644807
SLC25A40	protein_coding	ENSG00000075303	-0.52236	3.08822	2.27288e-10	9.53473e-10
TIMM21	protein_coding	ENSG00000075336	0.0162152	4.41231	0.827976	0.878843
RASAL2	protein_coding	ENSG00000075391	0.261923	5.74551	6.9936e-06	2.00826e-05
VPS9D1	protein_coding	ENSG00000075399	-0.566816	4.43659	1.47025e-15	8.53134e-15
ZNF37A	protein_coding	ENSG00000075407	0.291155	5.30134	2.03943e-06	6.20909e-06
MARK3	protein_coding	ENSG00000075413	0.291791	6.40144	2.21468e-07	7.38644e-07
SLC25A3	protein_coding	ENSG00000075415	0.115989	8.33947	0.0360305	0.0600233
FNDC3B	protein_coding	ENSG00000075420	0.010391	8.28398	0.846396	0.894504
FOSL2	protein_coding	ENSG00000075426	-0.100458	6.44575	0.0627715	0.0987064
CACNG4	protein_coding	ENSG00000075461	1.98156	-1.94861	4.92245e-07	1.5883e-06
FRYL	protein_coding	ENSG00000075539	0.0471484	5.42286	0.420925	0.51109
TMEM131	protein_coding	ENSG00000075568	0.098651	6.99679	0.0908265	0.137373
FSCN1	protein_coding	ENSG00000075618	1.0199	8.99763	2.59031e-73	6.37282e-72
ACTB	protein_coding	ENSG00000075624	0.416256	12.5498	3.24916e-13	1.64604e-12
MOCOS	protein_coding	ENSG00000075643	-1.19847	3.31344	4.62491e-51	7.92072e-50
PLD1	protein_coding	ENSG00000075651	-1.36321	3.58236	5.23654e-82	1.44785e-80
WDR62	protein_coding	ENSG00000075702	-0.627156	3.02944	7.0913e-06	2.03499e-05
DLG1	protein_coding	ENSG00000075711	0.342409	6.74052	8.16375e-10	3.29162e-09
RAB7A	protein_coding	ENSG00000075785	0.494776	8.23923	2.43114e-20	1.76628e-19
BCAP29	protein_coding	ENSG00000075790	0.274368	5.87445	5.38407e-05	0.000139937
SEC31B	protein_coding	ENSG00000075826	-0.452814	1.41454	0.0222633	0.0388798
SART3	protein_coding	ENSG00000075856	0.0789377	5.42445	0.175967	0.245032
EXOSC7	protein_coding	ENSG00000075914	-0.0408684	3.4378	0.683818	0.755514
KIFAP3	protein_coding	ENSG00000075945	-0.0532605	3.96796	0.46179	0.551485
MKRN2	protein_coding	ENSG00000075975	-0.203838	5.38915	0.00027587	0.0006554
MCM6	protein_coding	ENSG00000076003	-0.503021	4.81504	9.29836e-16	5.45108e-15
REXO2	protein_coding	ENSG00000076043	-0.0243051	6.11587	0.724067	0.791066
RBM7	protein_coding	ENSG00000076053	0.410673	4.7491	1.12997e-07	3.86291e-07
RBMS2	protein_coding	ENSG00000076067	-1.09242	6.96449	5.62712e-91	1.72331e-89
BAZ2A	protein_coding	ENSG00000076108	0.20188	6.82119	0.000670973	0.00151704
PTPN23	protein_coding	ENSG00000076201	-0.277004	5.77429	0.0352881	0.0589806
MLH1	protein_coding	ENSG00000076242	-0.260726	4.89822	6.23858e-05	0.000160725
UNG	protein_coding	ENSG00000076248	-0.304812	3.8859	1.72836e-05	4.74453e-05
FMO4	protein_coding	ENSG00000076258	0.110182	-1.98575	0.819154	0.871209
KLHL20	protein_coding	ENSG00000076321	-0.0182497	5.02024	0.767073	0.827355
RGS11	protein_coding	ENSG00000076344	-0.034103	0.654323	0.855741	0.901911
SLC46A1	protein_coding	ENSG00000076351	-0.738093	3.02836	7.64285e-18	4.9694e-17
PLXNA2	protein_coding	ENSG00000076356	2.23679	4.93868	5.70831e-181	4.10999e-179
SPAG5	protein_coding	ENSG00000076382	-0.0323551	4.26305	0.642457	0.719598
ANKRD13A	protein_coding	ENSG00000076513	0.277403	7.89681	1.54171e-07	5.21091e-07
ACACB	protein_coding	ENSG00000076555	-1.75878	-0.19296	2.92262e-14	1.58387e-13
TRAF4	protein_coding	ENSG00000076604	0.994682	5.34989	8.24852e-58	1.57813e-56
PAG1	protein_coding	ENSG00000076641	0.651799	4.89978	1.06374e-27	1.02425e-26
GPATCH1	protein_coding	ENSG00000076650	-0.502051	3.06531	2.34114e-10	9.80709e-10
ICAM3	protein_coding	ENSG00000076662	-0.256437	2.64381	0.00393638	0.00791494
NT5C2	protein_coding	ENSG00000076685	-0.175247	7.23314	0.00321242	0.00654809
MCAM	protein_coding	ENSG00000076706	0.0756408	8.10763	0.159436	0.225003
GPC4	protein_coding	ENSG00000076716	-0.292293	4.8743	2.88036e-07	9.50422e-07
MBNL3	protein_coding	ENSG00000076770	-0.359923	0.547712	0.0520982	0.0836835
RAP1GAP	protein_coding	ENSG00000076864	2.98068	-1.89369	2.75451e-12	1.31643e-11
XAB2	protein_coding	ENSG00000076924	-0.0835144	5.05272	0.158784	0.224273
ARHGEF1	protein_coding	ENSG00000076928	-0.0302566	5.93827	0.641886	0.71905
STXBP2	protein_coding	ENSG00000076944	0.0565938	-1.2112	0.930487	0.960882
MAP2K7	protein_coding	ENSG00000076984	-0.139722	4.93126	0.0207011	0.0364402
DGKD	protein_coding	ENSG00000077044	1.1292	4.79688	6.04892e-75	1.5287e-73
CTTNBP2	protein_coding	ENSG00000077063	-1.77165	2.79705	5.0658e-87	1.50693e-85
TOP2B	protein_coding	ENSG00000077097	0.0992256	7.41179	0.0896259	0.135813
TM9SF3	protein_coding	ENSG00000077147	0.402076	8.43303	2.05037e-12	9.86595e-12
NFKB2	protein_coding	ENSG00000077150	1.49152	5.96613	4.70096e-173	3.20174e-171
UBE2T	protein_coding	ENSG00000077152	-0.252796	2.78116	0.00985702	0.0185055
PPP1R12B	protein_coding	ENSG00000077157	0.0522585	4.6156	0.390066	0.480601
DNAJC10	protein_coding	ENSG00000077232	-0.073127	7.4936	0.194622	0.267336
GTF3C1	protein_coding	ENSG00000077235	-0.0214571	6.91751	0.686719	0.758103
IL4R	protein_coding	ENSG00000077238	1.16521	6.59925	2.79059e-90	8.47264e-89
USP33	protein_coding	ENSG00000077254	-0.279962	5.79273	4.88014e-06	1.42455e-05
PAK3	protein_coding	ENSG00000077264	0.0501892	-1.07215	0.913647	0.946706
SNRPA	protein_coding	ENSG00000077312	0.0431542	5.29361	0.450394	0.540473
EXOSC5	protein_coding	ENSG00000077348	-0.0543404	1.78904	0.666289	0.740648
DYNC1I2	protein_coding	ENSG00000077380	0.0171404	7.28496	0.797941	0.853538
LRCH4	protein_coding	ENSG00000077454	-0.420468	3.56089	1.28278e-06	3.98524e-06
FAM76B	protein_coding	ENSG00000077458	-0.237141	3.35829	0.00135661	0.00293771
SIRT6	protein_coding	ENSG00000077463	0.372507	4.01948	3.90804e-07	1.27332e-06
POLD3	protein_coding	ENSG00000077514	-0.517463	3.58879	7.95274e-12	3.67338e-11
CAPZB	protein_coding	ENSG00000077549	0.201866	7.85004	0.000139146	0.000342894
GPR137B	protein_coding	ENSG00000077585	0.174097	4.34808	0.00463892	0.00921827
JADE1	protein_coding	ENSG00000077684	0.535424	5.4711	1.73601e-22	1.39133e-21
SLC25A43	protein_coding	ENSG00000077713	0.393457	4.58613	8.55134e-10	3.43768e-09
UBE2A	protein_coding	ENSG00000077721	0.356928	6.47528	1.64864e-10	6.97242e-10
FGFR1	protein_coding	ENSG00000077782	0.242401	8.49325	6.33431e-06	1.82726e-05
FBLN1	protein_coding	ENSG00000077942	-0.109101	8.38759	0.0730836	0.113008
ITGA8	protein_coding	ENSG00000077943	-0.0444145	5.18092	0.531979	0.619577
MAP2	protein_coding	ENSG00000078018	0.202225	0.722646	0.304123	0.390134
PIAS2	protein_coding	ENSG00000078043	-0.144198	4.17324	0.028878	0.0491896
AMPH	protein_coding	ENSG00000078053	-0.256379	3.56844	0.000376196	0.000879302
ARAF	protein_coding	ENSG00000078061	0.0748873	5.74922	0.310899	0.397352
MCCC1	protein_coding	ENSG00000078070	-0.640948	3.68361	1.85012e-20	1.35027e-19
FAP	protein_coding	ENSG00000078098	0.0674557	6.49609	0.250082	0.330471
ACER3	protein_coding	ENSG00000078124	0.15072	4.04241	0.0249375	0.0430808
UBE2K	protein_coding	ENSG00000078140	0.430629	6.14413	8.89349e-15	4.95206e-14
PIK3C3	protein_coding	ENSG00000078142	0.28009	5.49783	2.54665e-06	7.66472e-06
N4BP2	protein_coding	ENSG00000078177	0.0611528	3.22767	0.446512	0.536581
TIGAR	protein_coding	ENSG00000078237	-0.236009	1.4017	0.0522138	0.08383
TULP3	protein_coding	ENSG00000078246	-0.705483	5.60412	4.69055e-38	6.08392e-37
SYNJ2	protein_coding	ENSG00000078269	1.15995	6.84393	8.46005e-103	3.05185e-101
PPP2R5C	protein_coding	ENSG00000078304	-0.122171	6.2045	0.0263651	0.0452678
PMS2P1	unprocessed_pseudogene	ENSG00000078319	-0.24651	2.51646	0.0105838	0.0197417
GNB1	protein_coding	ENSG00000078369	0.255295	9.17718	2.27345e-06	6.88474e-06
HOXA9	protein_coding	ENSG00000078399	-1.24618	-3.16731	0.114272	0.168218
EDN1	protein_coding	ENSG00000078401	1.89065	4.56281	1.04784e-154	6.41801e-153
MLLT10	protein_coding	ENSG00000078403	-1.08789	4.57723	4.01625e-65	8.66096e-64
ZCWPW1	protein_coding	ENSG00000078487	-0.171044	0.443006	0.277581	0.361048
NRDC	protein_coding	ENSG00000078618	0.0508697	7.87915	0.374665	0.46435
VDAC3	protein_coding	ENSG00000078668	-0.0582054	5.99191	0.317069	0.404388
PCM1	protein_coding	ENSG00000078674	-0.295714	6.40535	2.46108e-08	8.85447e-08
TNRC6C	protein_coding	ENSG00000078687	-0.288959	4.28126	4.26027e-06	1.25148e-05
CBFA2T2	protein_coding	ENSG00000078699	-0.298303	4.04608	1.74901e-05	4.79597e-05
ITCH	protein_coding	ENSG00000078747	0.320764	6.64569	9.99281e-08	3.43278e-07
TP53INP2	protein_coding	ENSG00000078804	0.957667	6.33645	4.63173e-50	7.7739e-49
SDF4	protein_coding	ENSG00000078808	0.0728557	8.27226	0.179777	0.249745
TOLLIP	protein_coding	ENSG00000078902	0.481256	5.68904	8.44746e-18	5.48447e-17
UBE2D4	protein_coding	ENSG00000078967	-0.569512	3.37257	5.03597e-12	2.35323e-11
RUNX1T1	protein_coding	ENSG00000079102	-2.28316	2.54664	1.58718e-125	7.42649e-124
THOC1	protein_coding	ENSG00000079134	0.238019	4.19344	0.00159234	0.00341091
FKBP7	protein_coding	ENSG00000079150	-0.147056	5.17835	0.0170089	0.0304823
OSBPL6	protein_coding	ENSG00000079156	0.535472	2.6202	1.7459e-07	5.86957e-07
SLC1A3	protein_coding	ENSG00000079215	0.989296	-1.14861	0.00160226	0.00343009
XRCC5	protein_coding	ENSG00000079246	0.101851	8.16123	0.0665529	0.103967
LXN	protein_coding	ENSG00000079257	0.781763	3.94825	3.013e-23	2.4871e-22
SP140	protein_coding	ENSG00000079263	0.858824	-1.12349	0.0168616	0.0302429
MKNK1	protein_coding	ENSG00000079277	-0.157606	4.35343	0.0188359	0.0334945
TNS1	protein_coding	ENSG00000079308	2.35244	8.51191	0	0
REXO1	protein_coding	ENSG00000079313	0.757353	5.4269	3.42919e-36	4.26894e-35
SAR1A	protein_coding	ENSG00000079332	0.369399	8.00857	4.96649e-10	2.03034e-09
CDC14A	protein_coding	ENSG00000079335	0.219455	2.32537	0.0261885	0.0450039
RAPGEF3	protein_coding	ENSG00000079337	0.556348	1.51287	4.95593e-05	0.0001294
SENP1	protein_coding	ENSG00000079387	-0.150756	4.44562	0.0293091	0.049871
CIC	protein_coding	ENSG00000079432	-0.324199	6.24324	7.14806e-06	2.05061e-05
LIPE	protein_coding	ENSG00000079435	-1.7834	1.36761	5.94359e-33	6.72946e-32
FDFT1	protein_coding	ENSG00000079459	-0.32371	7.08336	2.27325e-09	8.87171e-09
PAFAH1B3	protein_coding	ENSG00000079462	-0.191034	2.86104	0.035522	0.0592929
OPHN1	protein_coding	ENSG00000079482	-0.739948	2.93933	1.65616e-16	1.00394e-15
KIF22	protein_coding	ENSG00000079616	-0.497754	4.29461	3.64847e-14	1.96516e-13
CARMIL1	protein_coding	ENSG00000079691	-0.574682	2.944	3.70482e-11	1.63383e-10
PGM1	protein_coding	ENSG00000079739	-0.241409	5.11005	3.16915e-05	8.45747e-05
DDX1	protein_coding	ENSG00000079785	0.0775658	6.92887	0.165771	0.232782
DNM2	protein_coding	ENSG00000079805	0.19539	7.06967	0.00022072	0.000530449
EPB41L2	protein_coding	ENSG00000079819	-0.0555393	9.06434	0.320273	0.408032
RIMS1	protein_coding	ENSG00000079841	0.0504019	-2.05065	0.912125	0.945685
MOXD1	protein_coding	ENSG00000079931	-0.0439401	5.9051	0.444908	0.535017
STX7	protein_coding	ENSG00000079950	-0.365088	5.40932	1.21432e-06	3.78322e-06
RABL2B	protein_coding	ENSG00000079974	-0.42207	3.52377	1.94248e-09	7.60944e-09
KEAP1	protein_coding	ENSG00000079999	-0.0324584	5.57968	0.558983	0.644558
PTPRH	protein_coding	ENSG00000080031	-0.508158	-1.05747	0.093961	0.14158
SLC35C2	protein_coding	ENSG00000080189	0.0501054	4.8468	0.392862	0.483337
CRYBG3	protein_coding	ENSG00000080200	-0.413847	4.98727	1.68852e-09	6.64856e-09
RFX3	protein_coding	ENSG00000080298	-0.63858	1.75954	1.89514e-08	6.87018e-08
RIF1	protein_coding	ENSG00000080345	0.61263	6.14951	7.40435e-26	6.73609e-25
RAB21	protein_coding	ENSG00000080371	0.438762	6.05793	5.78336e-14	3.0899e-13
SLC4A4	protein_coding	ENSG00000080493	-0.220124	5.50443	0.000801121	0.00178974
SMARCA2	protein_coding	ENSG00000080503	-0.589851	5.62186	3.25765e-26	2.99141e-25
SESN1	protein_coding	ENSG00000080546	-1.35715	3.32648	5.4845e-71	1.29168e-69
MID2	protein_coding	ENSG00000080561	-0.375135	0.253102	0.0320514	0.0540419
COL5A3	protein_coding	ENSG00000080573	0.969448	4.73803	1.22994e-44	1.8232e-43
SRCAP	protein_coding	ENSG00000080603	0.0502066	2.07885	0.639606	0.716997
PUM3	protein_coding	ENSG00000080608	0.668892	6.38939	1.60752e-25	1.44456e-24
KCNN2	protein_coding	ENSG00000080709	-0.755412	0.395251	7.24702e-07	2.3067e-06
CNOT4	protein_coding	ENSG00000080802	0.296605	5.06704	3.9815e-07	1.29535e-06
PSEN1	protein_coding	ENSG00000080815	0.321453	6.38605	3.49164e-09	1.34306e-08
CPOX	protein_coding	ENSG00000080819	-0.18023	4.12413	0.0216995	0.0379929
CLDND1	protein_coding	ENSG00000080822	0.484945	5.70272	2.65153e-15	1.51959e-14
MOK	protein_coding	ENSG00000080823	0.383226	4.27452	2.08038e-08	7.52469e-08
HSP90AA1	protein_coding	ENSG00000080824	0.323355	10.5093	9.19876e-05	0.000232673
RBL1	protein_coding	ENSG00000080839	-0.363707	3.58747	3.03914e-06	9.06961e-06
DLGAP4	protein_coding	ENSG00000080845	0.523791	7.5754	1.8954e-11	8.51193e-11
CROCCP3	transcribed_unprocessed_pseudogene	ENSG00000080947	-0.251669	1.8678	0.0260442	0.0447821
NDC80	protein_coding	ENSG00000080986	-0.86103	3.39138	9.60828e-26	8.70072e-25
AP4E1	protein_coding	ENSG00000081014	-0.279521	4.76354	1.89242e-06	5.77849e-06
RSBN1	protein_coding	ENSG00000081019	-0.160235	3.88311	0.0309556	0.0523695
MAGI3	protein_coding	ENSG00000081026	-0.516401	3.49018	4.10243e-11	1.80421e-10
CXCL2	protein_coding	ENSG00000081041	5.51237	0.598688	1.89725e-149	1.11188e-147
AFP	protein_coding	ENSG00000081051	0.261616	-0.763078	0.296577	0.381982
COL4A4	protein_coding	ENSG00000081052	-0.305547	-1.49222	0.419989	0.510199
TCF7	protein_coding	ENSG00000081059	3.59029	4.0451	0	0
OSTM1	protein_coding	ENSG00000081087	0.165995	6.0057	0.0113019	0.0209396
IMPG2	protein_coding	ENSG00000081148	0.300995	-1.21757	0.27084	0.353897
PCNP	protein_coding	ENSG00000081154	0.0774948	6.88075	0.152192	0.216229
EXD2	protein_coding	ENSG00000081177	-0.419582	3.81285	6.4417e-09	2.42337e-08
ARG2	protein_coding	ENSG00000081181	-0.317429	1.28948	0.0120954	0.0222763
MEF2C	protein_coding	ENSG00000081189	0.446479	1.5902	0.000180203	0.000437547
PKP1	protein_coding	ENSG00000081277	4.95205	-1.08084	1.34523e-16	8.18552e-16
UBA5	protein_coding	ENSG00000081307	0.00147157	5.61494	0.980768	1
STK17B	protein_coding	ENSG00000081320	0.690599	5.81164	1.38922e-24	1.20778e-23
CDC14B	protein_coding	ENSG00000081377	0.465281	5.29322	7.94103e-17	4.89105e-16
ZNF510	protein_coding	ENSG00000081386	-1.08072	3.34281	8.18392e-39	1.07976e-37
ZNF506	protein_coding	ENSG00000081665	0.394857	3.1486	5.65118e-07	1.8148e-06
JMJD4	protein_coding	ENSG00000081692	-0.42134	3.98537	2.9468e-10	1.22361e-09
DUSP12	protein_coding	ENSG00000081721	0.0350279	3.96728	0.60834	0.689882
AACS	protein_coding	ENSG00000081760	0.00896492	4.91911	0.880357	0.92196
DELE1	protein_coding	ENSG00000081791	-0.0150964	5.31437	0.790101	0.847084
CADPS2	protein_coding	ENSG00000081803	0.379717	-2.49951	0.404399	0.495009
PCDHB4	protein_coding	ENSG00000081818	-0.839094	-2.6473	0.0503775	0.0811783
PCDHA6	protein_coding	ENSG00000081842	-0.445112	-3.30086	0.409835	0.50031
PCDHGA2	protein_coding	ENSG00000081853	-0.107357	3.96061	0.115826	0.170123
HSPB11	protein_coding	ENSG00000081870	-0.262445	3.71058	0.000886204	0.0019691
PHLPP1	protein_coding	ENSG00000081913	-0.394099	3.61119	1.72836e-08	6.29014e-08
ATP8B1	protein_coding	ENSG00000081923	-0.727708	7.49034	3.314e-36	4.12846e-35
SMARCD3	protein_coding	ENSG00000082014	0.164026	4.8526	0.0114102	0.021118
WDR70	protein_coding	ENSG00000082068	-0.498202	4.21565	5.78393e-14	3.0899e-13
MPP4	protein_coding	ENSG00000082126	-0.180887	3.07169	0.0195898	0.0346778
STRADB	protein_coding	ENSG00000082146	-0.446638	4.6883	7.97004e-13	3.93593e-12
BZW1	protein_coding	ENSG00000082153	0.745003	8.31054	1.26209e-32	1.41354e-31
ME2	protein_coding	ENSG00000082212	-0.0262029	5.32679	0.649904	0.726186
C5orf22	protein_coding	ENSG00000082213	-0.225151	4.83006	0.000158066	0.000386563
CCNT2	protein_coding	ENSG00000082258	0.397131	5.19232	3.71111e-12	1.7546e-11
FAM135A	protein_coding	ENSG00000082269	-0.149549	3.20799	0.0583262	0.0926245
EPB41L3	protein_coding	ENSG00000082397	0.858636	6.46086	9.99295e-44	1.46166e-42
COBLL1	protein_coding	ENSG00000082438	0.0374821	3.11415	0.668109	0.742203
DLG3	protein_coding	ENSG00000082458	-0.830176	3.75875	1.10388e-26	1.02866e-25
KCNK2	protein_coding	ENSG00000082482	0.473236	2.91763	5.68075e-07	1.82396e-06
SERTAD4	protein_coding	ENSG00000082497	-1.56383	2.76909	9.28478e-67	2.05242e-65
TRAF5	protein_coding	ENSG00000082512	0.0403387	4.62116	0.529339	0.617195
MRPL22	protein_coding	ENSG00000082515	0.0695639	4.03003	0.339827	0.428856
GEMIN5	protein_coding	ENSG00000082516	0.722349	5.25881	1.96802e-33	2.25135e-32
NFE2L1	protein_coding	ENSG00000082641	-0.0756382	8.5043	0.164629	0.231472
GSK3B	protein_coding	ENSG00000082701	-0.262003	6.52858	2.75084e-06	8.24551e-06
ITGB5	protein_coding	ENSG00000082781	0.122591	8.10832	0.0238301	0.0413255
ERC1	protein_coding	ENSG00000082805	0.154861	6.79057	0.0035166	0.00712693
XPO1	protein_coding	ENSG00000082898	-0.661393	6.96263	5.91192e-35	7.12825e-34
RNF13	protein_coding	ENSG00000082996	-0.10104	4.5554	0.0998847	0.149332
PALB2	protein_coding	ENSG00000083093	0.0898577	3.6378	0.225464	0.303324
DOP1A	protein_coding	ENSG00000083097	-1.46263	3.49456	1.11833e-77	2.9269e-76
LYRM2	protein_coding	ENSG00000083099	-0.436431	4.85396	2.96843e-10	1.23178e-09
BCKDHB	protein_coding	ENSG00000083123	-0.247703	3.52179	0.00165257	0.00353008
KAT6A	protein_coding	ENSG00000083168	0.416152	6.1076	3.39469e-15	1.93231e-14
TUT7	protein_coding	ENSG00000083223	0.525969	5.6737	4.57444e-21	3.44254e-20
ULK2	protein_coding	ENSG00000083290	-0.288206	3.92536	1.43824e-05	3.9872e-05
TNPO1	protein_coding	ENSG00000083312	0.570189	8.44975	7.21651e-27	6.79654e-26
PLOD1	protein_coding	ENSG00000083444	0.00493326	8.76665	0.926865	0.957907
P2RX5	protein_coding	ENSG00000083454	2.05906	0.373999	2.24714e-23	1.86364e-22
ITGAE	protein_coding	ENSG00000083457	-0.0686084	4.10263	0.350577	0.439842
DIS3	protein_coding	ENSG00000083520	0.387599	6.20132	3.05452e-12	1.45156e-11
PIBF1	protein_coding	ENSG00000083535	-0.31432	3.80627	0.000184684	0.000447995
TDRD3	protein_coding	ENSG00000083544	-0.365738	2.99929	1.50201e-05	4.15681e-05
NUFIP1	protein_coding	ENSG00000083635	0.537006	3.75677	1.96876e-13	1.01369e-12
PDS5B	protein_coding	ENSG00000083642	-0.10709	5.25247	0.0909408	0.137522
OXCT1	protein_coding	ENSG00000083720	-0.15462	5.22255	0.0118039	0.0217895
RRAGB	protein_coding	ENSG00000083750	-0.222336	3.35838	0.00473761	0.00939956
CYLD	protein_coding	ENSG00000083799	0.554901	5.47627	9.05893e-22	7.05829e-21
SLC27A5	protein_coding	ENSG00000083807	-0.288371	-0.16835	0.167059	0.234366
ZNF324	protein_coding	ENSG00000083812	0.584688	3.06327	6.9796e-14	3.70398e-13
ZNF671	protein_coding	ENSG00000083814	-0.479033	2.28352	3.91204e-06	1.15406e-05
ZNF416	protein_coding	ENSG00000083817	0.61697	2.37661	1.95802e-11	8.78418e-11
ZNF586	protein_coding	ENSG00000083828	0.524386	2.44381	1.46032e-08	5.34883e-08
ZNF446	protein_coding	ENSG00000083838	-1.24949	2.01253	1.78848e-32	1.99171e-31
ZNF264	protein_coding	ENSG00000083844	0.536563	4.13733	2.11192e-16	1.27278e-15
RPS5	protein_coding	ENSG00000083845	0.106697	7.74323	0.043086	0.0705305
FAT1	protein_coding	ENSG00000083857	0.259214	10.1827	0.00085227	0.001898
YTHDC1	protein_coding	ENSG00000083896	-0.182118	6.05279	0.00139773	0.00302029
CHMP2B	protein_coding	ENSG00000083937	0.0942232	5.0063	0.194695	0.267416
SMAP2	protein_coding	ENSG00000084070	0.664239	6.23461	5.22995e-30	5.39196e-29
PPIE	protein_coding	ENSG00000084072	-0.229756	4.22138	0.000438869	0.0010165
ZMPSTE24	protein_coding	ENSG00000084073	0.0774453	6.77448	0.169243	0.236828
STARD7	protein_coding	ENSG00000084090	0.02377	6.81298	0.664649	0.738964
NOA1	protein_coding	ENSG00000084092	-0.333174	4.23153	3.94158e-07	1.28354e-06
REST	protein_coding	ENSG00000084093	1.3293	6.45248	5.78662e-122	2.60398e-120
SSH1	protein_coding	ENSG00000084112	-0.249352	7.17669	3.39702e-06	1.00796e-05
GSTP1	protein_coding	ENSG00000084207	0.0665717	7.89598	0.236132	0.315009
APLP2	protein_coding	ENSG00000084234	0.138296	9.38468	0.0206278	0.0363366
FAM234B	protein_coding	ENSG00000084444	-0.951049	2.7218	2.1794e-23	1.80831e-22
WBP11	protein_coding	ENSG00000084463	0.235019	6.02601	8.82037e-06	2.50509e-05
EIF3I	protein_coding	ENSG00000084623	0.162319	7.33764	0.00170785	0.00364198
NKAIN1	protein_coding	ENSG00000084628	0.0918657	-2.763	0.89066	0.929164
COL16A1	protein_coding	ENSG00000084636	0.13894	7.94964	0.0200801	0.0354567
TXLNA	protein_coding	ENSG00000084652	-0.438243	6.93039	4.95841e-17	3.09178e-16
APOB	protein_coding	ENSG00000084674	-0.643698	-3.23316	0.333334	0.421867
NCOA1	protein_coding	ENSG00000084676	-0.151732	4.95193	0.00826604	0.0157431
AGBL5	protein_coding	ENSG00000084693	-0.316654	3.95658	4.85527e-06	1.41753e-05
EFR3B	protein_coding	ENSG00000084710	3.15888	2.49482	4.05607e-170	2.73088e-168
KIF3C	protein_coding	ENSG00000084731	-0.465425	4.92263	2.4636e-14	1.33964e-13
RAB10	protein_coding	ENSG00000084733	0.135611	7.08014	0.0130077	0.0238471
GCKR	protein_coding	ENSG00000084734	0.53198	-2.4584	0.27839	0.361914
HADHA	protein_coding	ENSG00000084754	-0.0814612	7.27851	0.138918	0.199976
MAPRE3	protein_coding	ENSG00000084764	0.230927	4.43646	0.000979847	0.00216516
CAD	protein_coding	ENSG00000084774	-0.277642	5.87135	4.35746e-05	0.000114503
CD59	protein_coding	ENSG00000085063	0.464813	8.35866	5.97017e-17	3.70563e-16
CD82	protein_coding	ENSG00000085117	0.514846	5.85773	1.57069e-20	1.1511e-19
BCORL1	protein_coding	ENSG00000085185	-0.440636	3.63987	1.69378e-08	6.1719e-08
ATRX	protein_coding	ENSG00000085224	-0.101671	6.84239	0.0784732	0.120507
AK6	protein_coding	ENSG00000085231	0.487427	2.74013	5.27026e-08	1.84862e-07
MYNN	protein_coding	ENSG00000085274	0.0557632	4.47325	0.361877	0.45145
MECOM	protein_coding	ENSG00000085276	0.820048	4.18724	2.22935e-38	2.90656e-37
SCAMP1	protein_coding	ENSG00000085365	-0.0843431	5.47585	0.212256	0.287971
PREP	protein_coding	ENSG00000085377	0.350087	5.27884	2.49501e-10	1.04294e-09
HACE1	protein_coding	ENSG00000085382	0.41824	3.73916	4.38127e-09	1.6696e-08
SEH1L	protein_coding	ENSG00000085415	0.559729	5.37294	3.91378e-17	2.45516e-16
WDR47	protein_coding	ENSG00000085433	0.176292	5.04877	0.00319559	0.00651753
WDFY1	protein_coding	ENSG00000085449	0.526792	6.9658	5.19244e-21	3.89433e-20
OVGP1	protein_coding	ENSG00000085465	0.481855	0.136041	0.00623123	0.0121189
SLC25A24	protein_coding	ENSG00000085491	0.283133	6.55437	3.39774e-06	1.00801e-05
MAP3K4	protein_coding	ENSG00000085511	1.0185	4.94717	3.37614e-68	7.60602e-67
PILRA	protein_coding	ENSG00000085514	-0.233674	-3.19959	0.757379	0.819189
ABCB1	protein_coding	ENSG00000085563	1.25902	1.26335	2.25091e-22	1.79584e-21
ZNF213	protein_coding	ENSG00000085644	-0.48533	3.45062	3.00013e-09	1.16083e-08
AKR1B1	protein_coding	ENSG00000085662	0.314183	6.2468	7.58494e-08	2.62813e-07
CPNE3	protein_coding	ENSG00000085719	-0.209181	6.24271	0.000493302	0.00113468
RRN3	protein_coding	ENSG00000085721	0.785116	5.56341	7.52266e-32	8.21162e-31
CTTN	protein_coding	ENSG00000085733	0.310274	8.92237	2.74358e-08	9.84274e-08
MTIF2	protein_coding	ENSG00000085760	-0.238663	4.8302	0.000549861	0.00125821
DDHD2	protein_coding	ENSG00000085788	-0.0271765	5.58234	0.635253	0.71325
TTC39A	protein_coding	ENSG00000085831	-0.0197415	-2.94486	1	1
EPS15	protein_coding	ENSG00000085832	-0.228372	5.66469	9.05756e-05	0.000229332
ORC1	protein_coding	ENSG00000085840	-0.574208	2.2424	2.52462e-07	8.3853e-07
MGST2	protein_coding	ENSG00000085871	0.0238475	2.51866	0.804564	0.859215
CHERP	protein_coding	ENSG00000085872	0.609139	5.53594	4.55177e-23	3.73805e-22
ATG16L1	protein_coding	ENSG00000085978	0.492351	4.68109	2.40389e-13	1.23019e-12
USP40	protein_coding	ENSG00000085982	-0.644217	4.86136	7.59217e-28	7.36261e-27
POMGNT1	protein_coding	ENSG00000085998	0.0784735	6.33856	0.136542	0.196975
RAD54L	protein_coding	ENSG00000085999	0.120757	2.08693	0.27898	0.36252
MAST2	protein_coding	ENSG00000086015	-0.0792144	5.87217	0.167317	0.234635
DNAJA1	protein_coding	ENSG00000086061	0.73559	8.19101	9.9594e-31	1.05643e-29
B4GALT1	protein_coding	ENSG00000086062	1.12389	7.45586	3.2074e-102	1.143e-100
CHMP5	protein_coding	ENSG00000086065	0.00372615	5.82363	0.954992	0.979422
NFX1	protein_coding	ENSG00000086102	-0.715661	5.3788	3.33482e-34	3.9375e-33
DIMT1	protein_coding	ENSG00000086189	0.753564	5.13123	9.79446e-37	1.2341e-35
IPO11	protein_coding	ENSG00000086200	0.0841231	4.22934	0.206448	0.281259
EIF2AK1	protein_coding	ENSG00000086232	-0.292689	6.70945	4.39723e-08	1.55228e-07
SEPHS1	protein_coding	ENSG00000086475	-0.31889	5.25186	2.40148e-08	8.6471e-08
MRPL28	protein_coding	ENSG00000086504	-0.159283	5.72523	0.00744611	0.0143129
ITPKC	protein_coding	ENSG00000086544	1.00543	4.58332	1.04367e-62	2.15578e-61
RBM22	protein_coding	ENSG00000086589	0.192674	5.19029	0.00100738	0.0022221
TMED2	protein_coding	ENSG00000086598	0.02152	8.52205	0.726525	0.793283
ERO1B	protein_coding	ENSG00000086619	0.343838	2.40164	0.000175439	0.000426451
ZFAND6	protein_coding	ENSG00000086666	0.18888	5.61872	0.000878319	0.0019528
HSD17B2	protein_coding	ENSG00000086696	-0.340884	2.45406	0.0023584	0.00491984
TXLNG	protein_coding	ENSG00000086712	0.266181	4.65743	1.84475e-05	5.04986e-05
LAT2	protein_coding	ENSG00000086730	1.09823	-0.667061	5.85969e-05	0.000151606
HUWE1	protein_coding	ENSG00000086758	-0.285551	7.93284	7.41986e-06	2.12305e-05
ZW10	protein_coding	ENSG00000086827	-0.214998	4.3007	0.000766434	0.00171681
ALG9	protein_coding	ENSG00000086848	-0.312133	2.82489	0.000534817	0.00122554
NOX4	protein_coding	ENSG00000086991	2.14189	1.92497	2.62279e-71	6.24373e-70
ACOX3	protein_coding	ENSG00000087008	0.589629	4.18372	3.11745e-18	2.07516e-17
MTMR2	protein_coding	ENSG00000087053	0.578424	6.05176	6.43499e-27	6.07672e-26
PPP1R15A	protein_coding	ENSG00000087074	1.33073	7.94258	1.23328e-141	6.69388e-140
HSD17B14	protein_coding	ENSG00000087076	0.024535	1.23242	0.842688	0.891127
TRIP6	protein_coding	ENSG00000087077	-0.100733	6.59923	0.0734538	0.113521
ACHE	protein_coding	ENSG00000087085	0.630288	-1.46616	0.0299424	0.0508505
FTL	protein_coding	ENSG00000087086	-0.00412946	11.1451	0.950561	0.976809
SRRT	protein_coding	ENSG00000087087	0.486179	7.04371	8.39831e-20	5.94965e-19
BAX	protein_coding	ENSG00000087088	-0.158061	6.23257	0.00372048	0.00751422
NLK	protein_coding	ENSG00000087095	-0.504268	5.42418	9.84027e-20	6.95164e-19
PIGS	protein_coding	ENSG00000087111	-0.275135	6.15365	3.19588e-06	9.50841e-06
ADAMTS2	protein_coding	ENSG00000087116	0.402028	7.19783	1.33818e-12	6.52268e-12
ATXN7L3	protein_coding	ENSG00000087152	-0.0232955	5.91946	0.670056	0.743961
PGS1	protein_coding	ENSG00000087157	-0.0483589	4.13714	0.472734	0.562346
PSMC5	protein_coding	ENSG00000087191	0.147013	6.85881	0.0120455	0.0221891
UIMC1	protein_coding	ENSG00000087206	0.0811101	4.65746	0.224267	0.301897
MMP2	protein_coding	ENSG00000087245	0.037286	10.2321	0.520067	0.609122
LPCAT2	protein_coding	ENSG00000087253	-0.136021	4.4086	0.0265226	0.045507
GNAO1	protein_coding	ENSG00000087258	-0.623232	-3.39229	0.258021	0.339259
OGFOD1	protein_coding	ENSG00000087263	-0.0979752	6.12275	0.0835158	0.127419
SH3BP2	protein_coding	ENSG00000087266	0.296229	5.04036	5.80225e-05	0.000150208
NOP14	protein_coding	ENSG00000087269	0.554024	6.24797	2.70647e-23	2.23826e-22
ADD1	protein_coding	ENSG00000087274	-0.0357921	8.45987	0.487022	0.576698
L2HGDH	protein_coding	ENSG00000087299	-0.871076	2.1223	3.84522e-15	2.18032e-14
TXNDC16	protein_coding	ENSG00000087301	-0.0378871	2.32816	0.692703	0.763324
RTRAF	protein_coding	ENSG00000087302	0.0378075	6.50944	0.552934	0.639046
NID2	protein_coding	ENSG00000087303	-0.134346	9.73426	0.0152275	0.0275471
GMCL1	protein_coding	ENSG00000087338	-0.394429	4.40493	6.35423e-09	2.39301e-08
SF3B2	protein_coding	ENSG00000087365	0.240796	7.79211	1.47243e-05	4.07877e-05
KLHL42	protein_coding	ENSG00000087448	0.946274	6.11022	3.44031e-71	8.15686e-70
GNAS	protein_coding	ENSG00000087460	0.175935	9.37935	0.00217728	0.00457447
DNM1L	protein_coding	ENSG00000087470	-0.00924578	6.24301	0.878271	0.920377
PTHLH	protein_coding	ENSG00000087494	1.56604	3.61547	6.8839e-93	2.16843e-91
ERGIC2	protein_coding	ENSG00000087502	0.0339962	6.29449	0.585423	0.669295
TFAP2C	protein_coding	ENSG00000087510	-1.00873	-0.310669	1.53413e-05	4.24171e-05
AURKA	protein_coding	ENSG00000087586	-1.03038	5.31781	1.10753e-67	2.47615e-66
CASS4	protein_coding	ENSG00000087589	-2.35712	5.41859	0	0
PIR	protein_coding	ENSG00000087842	-0.0856466	3.64287	0.240528	0.319954
AAMDC	protein_coding	ENSG00000087884	-0.144125	2.92039	0.129721	0.188072
RFX2	protein_coding	ENSG00000087903	-1.06032	2.07139	2.81249e-24	2.41423e-23
METTL2A	protein_coding	ENSG00000087995	-0.0525437	4.11853	0.459337	0.548927
ALG6	protein_coding	ENSG00000088035	-0.309799	2.45951	0.000987875	0.00218181
CNOT3	protein_coding	ENSG00000088038	0.35559	5.6763	1.66826e-07	5.6214e-07
PTPN4	protein_coding	ENSG00000088179	-0.918781	3.34031	5.53913e-32	6.08029e-31
DDX18	protein_coding	ENSG00000088205	0.491465	6.29872	2.06715e-17	1.31689e-16
KHSRP	protein_coding	ENSG00000088247	0.345282	7.46212	9.10945e-10	3.65788e-09
GNA11	protein_coding	ENSG00000088256	0.198261	7.04093	0.000145578	0.000357846
ASAP3	protein_coding	ENSG00000088280	-0.943568	3.86513	1.59087e-45	2.40265e-44
EDEM2	protein_coding	ENSG00000088298	-0.200471	4.79181	0.000744017	0.00167084
DNMT3B	protein_coding	ENSG00000088305	-0.902266	2.07471	2.5027e-17	1.58633e-16
TPX2	protein_coding	ENSG00000088325	-0.531346	6.0584	3.27464e-22	2.59734e-21
FER1L4	transcribed_unitary_pseudogene	ENSG00000088340	0.533611	0.204744	0.00744577	0.0143129
PDRG1	protein_coding	ENSG00000088356	-0.00861037	3.57532	0.932199	0.962256
EPB41L1	protein_coding	ENSG00000088367	0.106997	5.59861	0.0534123	0.0855296
DOCK9	protein_coding	ENSG00000088387	0.358702	4.53814	2.5234e-09	9.81322e-09
ANKRD10	protein_coding	ENSG00000088448	0.212708	5.0264	0.000665323	0.00150504
TGDS	protein_coding	ENSG00000088451	-0.645707	3.1754	3.08812e-13	1.56896e-12
DOCK3	protein_coding	ENSG00000088538	-1.68491	-1.1331	1.93533e-06	5.90745e-06
C3orf18	protein_coding	ENSG00000088543	-0.666237	3.28717	3.92174e-16	2.33635e-15
COQ9	protein_coding	ENSG00000088682	-0.26263	4.02128	0.000242715	0.000580541
TMEM40	protein_coding	ENSG00000088726	-0.879579	-3.12024	0.172826	0.24121
KIF9	protein_coding	ENSG00000088727	0.536264	0.855647	0.000518536	0.00119024
ARHGAP28	protein_coding	ENSG00000088756	-1.89896	2.65491	1.07682e-83	3.05879e-82
CRLS1	protein_coding	ENSG00000088766	-0.243833	4.47531	0.00013173	0.000325725
PPP1R13B	protein_coding	ENSG00000088808	0.928643	1.64241	7.12295e-16	4.2023e-15
ATRN	protein_coding	ENSG00000088812	-0.203732	7.01796	0.000101646	0.00025549
SMOX	protein_coding	ENSG00000088826	1.93308	5.30732	2.01485e-220	1.91086e-218
FKBP1A	protein_coding	ENSG00000088832	0.4601	7.27223	5.93757e-14	3.1691e-13
NSFL1C	protein_coding	ENSG00000088833	0.228589	6.52172	3.69286e-05	9.79137e-05
SLC4A11	protein_coding	ENSG00000088836	-0.636206	0.864394	1.06119e-05	2.98506e-05
C20orf194	protein_coding	ENSG00000088854	-0.0800501	5.53401	0.142915	0.204878
ZNF343	protein_coding	ENSG00000088876	0.195628	3.52951	0.00918669	0.0173542
EBF4	protein_coding	ENSG00000088881	0.279536	1.42964	0.0415842	0.0682875
CPXM1	protein_coding	ENSG00000088882	-0.219921	0.829279	0.136031	0.196349
MAVS	protein_coding	ENSG00000088888	-0.501026	7.08648	3.87573e-20	2.78939e-19
LZTS3	protein_coding	ENSG00000088899	-0.252491	3.90251	0.00013147	0.000325172
XRN2	protein_coding	ENSG00000088930	0.153355	7.01969	0.00874047	0.0165751
KIZ	protein_coding	ENSG00000088970	-0.757514	3.00939	7.75886e-20	5.51214e-19
DYNLL1	protein_coding	ENSG00000088986	0.167995	7.42239	0.0158541	0.0285841
SNX5	protein_coding	ENSG00000089006	0.245023	5.68411	6.23217e-05	0.000160584
RPL6	protein_coding	ENSG00000089009	0.0600082	9.36572	0.354193	0.443591
MAPKAPK5	protein_coding	ENSG00000089022	0.327306	4.86402	1.84233e-07	6.17845e-07
P2RX7	protein_coding	ENSG00000089041	-0.87105	1.10121	6.88127e-13	3.40875e-12
ESF1	protein_coding	ENSG00000089048	1.00523	5.34596	1.81571e-39	2.42277e-38
RBBP9	protein_coding	ENSG00000089050	-0.412419	3.87636	1.34102e-08	4.92619e-08
ANAPC5	protein_coding	ENSG00000089053	-0.129402	6.05926	0.0148457	0.0269201
SLC23A2	protein_coding	ENSG00000089057	-0.0226789	5.72583	0.689152	0.760361
SLC8B1	protein_coding	ENSG00000089060	-0.296003	3.63896	3.14677e-05	8.40156e-05
TMEM230	protein_coding	ENSG00000089063	-0.0321313	6.53337	0.553139	0.639123
DZANK1	protein_coding	ENSG00000089091	-0.561618	0.47604	0.0049048	0.00970506
KDM2B	protein_coding	ENSG00000089094	0.289339	4.89284	5.55573e-06	1.61189e-05
TASP1	protein_coding	ENSG00000089123	-0.247455	2.03912	0.020596	0.0362906
GCN1	protein_coding	ENSG00000089154	-0.11979	7.36127	0.0213648	0.0374739
RPLP0	protein_coding	ENSG00000089157	-0.00394062	10.3675	0.951226	0.977328
PXN	protein_coding	ENSG00000089159	0.996836	8.3661	1.1284e-50	1.91763e-49
SIRT4	protein_coding	ENSG00000089163	-1.22686	-1.40855	3.35014e-05	8.91082e-05
KIF16B	protein_coding	ENSG00000089177	-0.505985	2.74083	2.93668e-09	1.13703e-08
TRMT6	protein_coding	ENSG00000089195	0.50168	4.59494	9.93392e-14	5.22152e-13
CHGB	protein_coding	ENSG00000089199	0.364247	-2.3636	0.361843	0.45145
PEBP1	protein_coding	ENSG00000089220	-0.0792016	7.3608	0.220834	0.297921
TBX5	protein_coding	ENSG00000089225	-3.2518	4.52985	0	0
BRAP	protein_coding	ENSG00000089234	0.154257	4.62001	0.0238804	0.0413965
ERP29	protein_coding	ENSG00000089248	-0.101446	7.1146	0.0996331	0.148994
FUS	protein_coding	ENSG00000089280	0.40986	8.43865	7.64017e-14	4.0448e-13
IGBP1	protein_coding	ENSG00000089289	0.00350361	5.0463	0.95881	0.982424
FXYD5	protein_coding	ENSG00000089327	0.14631	6.7286	0.008683	0.0164732
ZNF302	protein_coding	ENSG00000089335	-0.614792	4.34419	1.34428e-22	1.08229e-21
GRAMD1A	protein_coding	ENSG00000089351	0.412639	5.6195	2.89461e-09	1.12247e-08
HEPH	protein_coding	ENSG00000089472	-0.0990583	4.04874	0.195144	0.267907
CDIP1	protein_coding	ENSG00000089486	0.0345407	4.19362	0.618521	0.698733
CMTM1	protein_coding	ENSG00000089505	-0.771135	0.398543	6.38395e-06	1.84068e-05
GANAB	protein_coding	ENSG00000089597	-0.0649219	9.29219	0.21428	0.29027
GMIP	protein_coding	ENSG00000089639	0.367075	3.9173	5.95507e-07	1.90718e-06
RBM41	protein_coding	ENSG00000089682	-0.25121	3.80895	0.00219813	0.00461277
BIRC5	protein_coding	ENSG00000089685	-0.376863	4.75957	2.88188e-08	1.03096e-07
LAG3	protein_coding	ENSG00000089692	0.648391	-2.18998	0.147971	0.211079
MLF2	protein_coding	ENSG00000089693	0.291014	7.85051	3.31778e-08	1.18043e-07
OTUB2	protein_coding	ENSG00000089723	-0.590232	1.43514	1.53545e-05	4.24468e-05
DDX24	protein_coding	ENSG00000089737	0.533132	7.55075	7.37894e-22	5.78509e-21
ZBTB25	protein_coding	ENSG00000089775	-0.937896	2.36842	2.71416e-22	2.15957e-21
NECAP1	protein_coding	ENSG00000089818	0.0645063	4.39728	0.34653	0.435632
ARHGAP4	protein_coding	ENSG00000089820	0.671236	-1.68069	0.0313242	0.0529373
ANKRD24	protein_coding	ENSG00000089847	-0.689456	-0.80132	0.00170143	0.00363006
DHX32	protein_coding	ENSG00000089876	-0.459509	4.38693	2.61697e-12	1.25172e-11
RCOR1	protein_coding	ENSG00000089902	1.17945	5.5787	8.69165e-106	3.23461e-104
GPATCH2L	protein_coding	ENSG00000089916	0.813207	5.90337	1.85351e-41	2.57854e-40
LTBP4	protein_coding	ENSG00000090006	-0.0722557	8.25331	0.361947	0.451506
BLVRB	protein_coding	ENSG00000090013	-0.16588	3.86092	0.0124066	0.0228114
SLC9A1	protein_coding	ENSG00000090020	0.276049	6.20599	9.16958e-06	2.59826e-05
SPTLC1	protein_coding	ENSG00000090054	0.205765	6.80736	0.000692008	0.00156163
PAPOLA	protein_coding	ENSG00000090060	0.303252	7.65282	6.43797e-08	2.24616e-07
CCNK	protein_coding	ENSG00000090061	0.621315	6.21339	3.44885e-21	2.62232e-20
PCBP4	protein_coding	ENSG00000090097	-0.274199	5.199	0.000133895	0.000330659
YPEL3	protein_coding	ENSG00000090238	-0.399725	3.22299	2.84814e-08	1.01951e-07
MRPS33	protein_coding	ENSG00000090263	-0.239044	3.57024	0.00149852	0.00322443
NDUFB2	protein_coding	ENSG00000090266	0.215989	4.28075	0.00417076	0.00835099
NUDC	protein_coding	ENSG00000090273	0.239841	7.39723	6.66874e-05	0.000171257
MAEA	protein_coding	ENSG00000090316	-0.00350665	5.96567	0.952997	0.978115
ICAM1	protein_coding	ENSG00000090339	2.19127	7.32755	0	0
STRN4	protein_coding	ENSG00000090372	0.329053	6.69022	4.99557e-10	2.04175e-09
IRAK3	protein_coding	ENSG00000090376	-0.882376	2.12298	2.0508e-16	1.23679e-15
MUL1	protein_coding	ENSG00000090432	0.150908	4.7786	0.0107577	0.0200387
TFAP4	protein_coding	ENSG00000090447	-1.24997	2.0328	1.17375e-25	1.05853e-24
PDCD7	protein_coding	ENSG00000090470	0.45199	4.75952	4.53961e-13	2.27302e-12
SPG21	protein_coding	ENSG00000090487	-0.0975199	5.03448	0.106953	0.158649
DNAJB11	protein_coding	ENSG00000090520	0.126003	5.96304	0.0267173	0.0458144
P3H2	protein_coding	ENSG00000090530	1.06012	8.05637	4.94093e-91	1.51579e-89
CHRD	protein_coding	ENSG00000090539	-0.506822	-2.04355	0.247803	0.327992
RAB11FIP3	protein_coding	ENSG00000090565	0.312538	6.02629	1.01531e-08	3.76974e-08
GNPTG	protein_coding	ENSG00000090581	0.00163509	4.64343	0.983531	1
ZNF268	protein_coding	ENSG00000090612	-0.0110185	4.00869	0.879165	0.92104
GOLGA3	protein_coding	ENSG00000090615	-0.309406	7.36182	1.74391e-08	6.34149e-08
PABPC4	protein_coding	ENSG00000090621	0.421678	7.72524	1.51016e-15	8.74852e-15
CERS4	protein_coding	ENSG00000090661	0.0680313	0.67293	0.62847	0.707435
MCOLN1	protein_coding	ENSG00000090674	0.177531	3.61194	0.0148705	0.0269567
USP48	protein_coding	ENSG00000090686	-0.457872	6.04275	1.12126e-15	6.54716e-15
EFNB1	protein_coding	ENSG00000090776	-0.172745	5.50408	0.00347251	0.00704486
PDPR	protein_coding	ENSG00000090857	-0.581963	5.5722	1.3306e-21	1.02901e-20
AARS	protein_coding	ENSG00000090861	-0.907147	6.78366	3.87887e-63	8.07831e-62
GLG1	protein_coding	ENSG00000090863	-0.303903	8.28846	2.91665e-09	1.13027e-08
KIF4A	protein_coding	ENSG00000090889	-0.37874	4.14616	1.96542e-08	7.11764e-08
TNRC6A	protein_coding	ENSG00000090905	-0.345919	6.77918	1.09228e-10	4.67097e-10
PLEKHG2	protein_coding	ENSG00000090924	0.539327	6.02077	5.70957e-15	3.20754e-14
DLL3	protein_coding	ENSG00000090932	-0.699647	-2.72884	0.303756	0.389805
NAT14	protein_coding	ENSG00000090971	-0.072281	4.22441	0.287702	0.372209
PITPNM2	protein_coding	ENSG00000090975	1.05708	4.84268	5.1965e-41	7.16143e-40
EXOC1	protein_coding	ENSG00000090989	-0.512033	5.22596	3.41534e-17	2.15013e-16
RBM27	protein_coding	ENSG00000091009	0.464077	3.5343	5.28665e-11	2.31291e-10
OSBPL8	protein_coding	ENSG00000091039	0.293886	6.90985	1.40351e-06	4.33969e-06
DTX2	protein_coding	ENSG00000091073	0.090603	3.39148	0.258636	0.339991
PUS7	protein_coding	ENSG00000091127	0.829687	4.51602	1.49692e-38	1.96179e-37
NRCAM	protein_coding	ENSG00000091129	1.09723	-0.0481638	5.00542e-08	1.75958e-07
LAMB1	protein_coding	ENSG00000091136	-0.0820556	9.08924	0.188806	0.260688
SLC26A4	protein_coding	ENSG00000091137	-0.743418	-2.00852	0.0818092	0.125073
DLD	protein_coding	ENSG00000091140	-0.106113	5.97017	0.100753	0.1504
WDR7	protein_coding	ENSG00000091157	-0.565578	4.04698	1.65833e-17	1.06182e-16
TXNL1	protein_coding	ENSG00000091164	0.334296	6.32789	1.06587e-08	3.94749e-08
ABCC6	protein_coding	ENSG00000091262	-0.834561	0.856231	7.0758e-09	2.65681e-08
CMTM6	protein_coding	ENSG00000091317	0.313922	7.1091	1.04155e-07	3.57242e-07
ITGA6	protein_coding	ENSG00000091409	-0.136856	6.41409	0.0287788	0.0490301
RAPGEF4	protein_coding	ENSG00000091428	-0.801256	0.688995	3.84107e-07	1.2522e-06
MAP3K20	protein_coding	ENSG00000091436	0.0368773	8.79532	0.515998	0.605119
FH	protein_coding	ENSG00000091483	-0.0656465	5.42449	0.281642	0.365361
SEL1L3	protein_coding	ENSG00000091490	0.0131706	6.62468	0.811811	0.865226
CDV3	protein_coding	ENSG00000091527	0.420815	8.98459	4.3109e-13	2.16096e-12
MYO15A	protein_coding	ENSG00000091536	-0.885052	-2.03695	0.0231228	0.0402215
ALKBH5	protein_coding	ENSG00000091542	-0.28553	5.93414	1.09886e-07	3.76165e-07
NLRP1	protein_coding	ENSG00000091592	0.0972601	7.65607	0.0685995	0.106805
PITPNM3	protein_coding	ENSG00000091622	1.99415	4.77272	2.10266e-213	1.88279e-211
SPAG7	protein_coding	ENSG00000091640	-0.0125154	5.65724	0.825848	0.87706
ORC6	protein_coding	ENSG00000091651	0.0926395	3.34725	0.244794	0.324576
ZFHX4	protein_coding	ENSG00000091656	-1.64666	4.50897	1.99792e-60	3.98679e-59
ZC3HC1	protein_coding	ENSG00000091732	-0.179665	3.57897	0.0198941	0.0351671
RGS17	protein_coding	ENSG00000091844	-0.397163	2.85178	7.24573e-07	2.3067e-06
ANGPT2	protein_coding	ENSG00000091879	1.41257	-1.92203	0.0208638	0.0366791
TMEM101	protein_coding	ENSG00000091947	-0.463244	3.65134	3.33444e-09	1.28427e-08
CD200	protein_coding	ENSG00000091972	-0.740186	0.473482	4.34191e-06	1.27397e-05
CCDC80	protein_coding	ENSG00000091986	-0.270859	10.987	8.84397e-07	2.79634e-06
PSME1	protein_coding	ENSG00000092010	0.0766935	5.69915	0.311687	0.398302
PPP2R3C	protein_coding	ENSG00000092020	0.0204552	4.78132	0.775167	0.834235
HAUS4	protein_coding	ENSG00000092036	-0.269941	0.632341	0.0875809	0.132988
SLC7A8	protein_coding	ENSG00000092068	0.135007	-0.624997	0.701424	0.770959
OSGEP	protein_coding	ENSG00000092094	-0.264603	3.45093	0.000472235	0.00108906
SLC22A17	protein_coding	ENSG00000092096	-0.0671381	4.54573	0.315756	0.403005
RNF31	protein_coding	ENSG00000092098	-0.20864	3.5708	0.00941515	0.017742
SCFD1	protein_coding	ENSG00000092108	-0.131847	5.92717	0.0206246	0.0363346
G2E3	protein_coding	ENSG00000092140	0.160237	4.61451	0.012683	0.0232857
HECTD1	protein_coding	ENSG00000092148	0.0433106	7.0392	0.431041	0.521221
HNRNPC	protein_coding	ENSG00000092199	0.31445	8.79671	3.2637e-07	1.0719e-06
SUPT16H	protein_coding	ENSG00000092201	0.0687574	7.17299	0.245558	0.325468
TOX4	protein_coding	ENSG00000092203	0.203038	6.27455	0.000201702	0.000487333
GEMIN2	protein_coding	ENSG00000092208	-0.720992	1.81917	3.66188e-10	1.5096e-09
TGM1	protein_coding	ENSG00000092295	-0.274437	0.469637	0.0732499	0.113245
TINF2	protein_coding	ENSG00000092330	0.165544	4.97185	0.00424182	0.00848364
SEMA6A	protein_coding	ENSG00000092421	-0.68914	2.87001	2.73658e-17	1.72899e-16
TRPM7	protein_coding	ENSG00000092439	0.0796501	6.12086	0.152377	0.216419
TYRO3	protein_coding	ENSG00000092445	0.201389	5.2246	0.000713441	0.00160688
WDR76	protein_coding	ENSG00000092470	-0.301906	3.75694	9.42274e-05	0.000237827
SNAP23	protein_coding	ENSG00000092531	-0.0852459	6.36388	0.157685	0.222935
PHGDH	protein_coding	ENSG00000092621	-0.253339	7.56792	3.10228e-06	9.24238e-06
COL9A3	protein_coding	ENSG00000092758	-0.0548999	-0.113703	0.795613	0.851563
EZR	protein_coding	ENSG00000092820	1.18202	7.68244	3.27879e-101	1.15215e-99
MYL6	protein_coding	ENSG00000092841	0.0738556	8.3924	0.273426	0.356492
AGO1	protein_coding	ENSG00000092847	-0.291029	4.99243	7.84692e-07	2.49225e-06
CLSPN	protein_coding	ENSG00000092853	-0.0769793	3.90261	0.273554	0.356625
RFFL	protein_coding	ENSG00000092871	0.183316	3.48919	0.0206912	0.0364277
UNC13D	protein_coding	ENSG00000092929	-0.29136	-3.13514	0.712488	0.78059
MFSD11	protein_coding	ENSG00000092931	-0.182964	3.00168	0.0261621	0.0449717
DPYSL2	protein_coding	ENSG00000092964	-1.00953	6.69999	7.52815e-85	2.18057e-83
TGFB2	protein_coding	ENSG00000092969	-0.268171	5.41657	3.27427e-06	9.72849e-06
GPATCH2	protein_coding	ENSG00000092978	0.202323	4.16582	0.00514774	0.0101459
NUP50	protein_coding	ENSG00000093000	0.483066	6.43433	3.42132e-17	2.15313e-16
CDC45	protein_coding	ENSG00000093009	-0.238847	3.00623	0.00626762	0.0121786
COMT	protein_coding	ENSG00000093010	0.0307841	6.2192	0.584091	0.668096
ADA2	protein_coding	ENSG00000093072	-0.282588	1.28436	0.0236919	0.0411223
AC016026.1	processed_transcript	ENSG00000093100	0.735358	-2.41957	0.109589	0.162229
ECHDC1	protein_coding	ENSG00000093144	-0.126163	6.00514	0.076558	0.117864
LRRFIP2	protein_coding	ENSG00000093167	0.466708	6.53257	7.36956e-17	4.54542e-16
SEC22C	protein_coding	ENSG00000093183	-0.257321	5.32528	1.45673e-05	4.03591e-05
XYLB	protein_coding	ENSG00000093217	-0.0749059	1.59848	0.532497	0.620016
HDAC6	protein_coding	ENSG00000094631	-0.451998	4.02764	1.7498e-10	7.38385e-10
CDC6	protein_coding	ENSG00000094804	-0.196123	4.2117	0.0089766	0.0169846
UPRT	protein_coding	ENSG00000094841	0.0535721	3.35681	0.521017	0.609878
CDC23	protein_coding	ENSG00000094880	-0.139841	4.83369	0.018619	0.0331522
AAAS	protein_coding	ENSG00000094914	-0.308253	4.67109	1.81017e-06	5.54268e-06
CBX5	protein_coding	ENSG00000094916	-0.47809	6.65756	3.09406e-17	1.95275e-16
FMO2	protein_coding	ENSG00000094963	-1.28597	1.63753	2.27003e-21	1.73875e-20
SUCO	protein_coding	ENSG00000094975	0.142161	6.44588	0.0179835	0.0320985
MSH2	protein_coding	ENSG00000095002	-0.341237	4.51441	7.17073e-08	2.49196e-07
MAP3K1	protein_coding	ENSG00000095015	-1.58698	3.76584	6.30357e-99	2.16333e-97
DHPS	protein_coding	ENSG00000095059	0.858129	-0.15359	9.3851e-05	0.000236979
HOOK2	protein_coding	ENSG00000095066	-0.286055	3.11814	0.000647424	0.00146681
ARCN1	protein_coding	ENSG00000095139	0.217433	8.57563	4.86004e-05	0.00012716
EPB41L4B	protein_coding	ENSG00000095203	0.155815	-0.492327	0.592816	0.675972
TMEM38B	protein_coding	ENSG00000095209	0.225164	3.20308	0.0058602	0.0114491
PSMD5	protein_coding	ENSG00000095261	-0.107676	5.9565	0.0549999	0.0878485
PTGS1	protein_coding	ENSG00000095303	0.427372	7.75344	7.37855e-14	3.91099e-13
NUP188	protein_coding	ENSG00000095319	0.529948	6.16376	4.3387e-20	3.11623e-19
CRAT	protein_coding	ENSG00000095321	-0.307313	5.24867	1.36972e-06	4.23978e-06
NANS	protein_coding	ENSG00000095380	0.777116	6.64372	1.51988e-43	2.21211e-42
TBC1D2	protein_coding	ENSG00000095383	2.16518	6.8767	0	0
WHRN	protein_coding	ENSG00000095397	0.848674	2.22488	2.35554e-18	1.57512e-17
CWF19L1	protein_coding	ENSG00000095485	-0.0785246	3.55062	0.289425	0.374053
SEMA4G	protein_coding	ENSG00000095539	-0.439883	3.14899	1.73472e-07	5.83757e-07
BTAF1	protein_coding	ENSG00000095564	0.507426	6.05945	5.82912e-22	4.58225e-21
IKZF5	protein_coding	ENSG00000095574	-0.491147	3.58111	4.26428e-12	2.00645e-11
SORBS1	protein_coding	ENSG00000095637	0.385688	-0.690922	0.083256	0.127045
BAMBI	protein_coding	ENSG00000095739	0.237876	4.26991	0.000131398	0.000325041
IL11	protein_coding	ENSG00000095752	5.2162	9.99579	0	0
WAC	protein_coding	ENSG00000095787	0.472262	7.21355	5.52904e-19	3.79799e-18
CREM	protein_coding	ENSG00000095794	0.821695	3.90747	2.10919e-26	1.94288e-25
NUBP2	protein_coding	ENSG00000095906	-0.205539	4.32058	0.00251838	0.00523255
HIVEP1	protein_coding	ENSG00000095951	2.52202	6.3232	0	0
FKBP5	protein_coding	ENSG00000096060	1.13827	4.02949	1.59847e-57	3.03194e-56
SRPK1	protein_coding	ENSG00000096063	0.272848	6.06529	1.77094e-06	5.42823e-06
BRPF3	protein_coding	ENSG00000096070	0.264612	6.2931	2.06234e-06	6.27561e-06
MRPS18A	protein_coding	ENSG00000096080	-0.0364553	4.33276	0.574827	0.65938
TMEM14A	protein_coding	ENSG00000096092	-0.0196459	3.26437	0.818696	0.870879
EFHC1	protein_coding	ENSG00000096093	-0.833707	3.10663	1.99605e-28	1.96925e-27
HSP90AB1	protein_coding	ENSG00000096384	0.640557	10.1975	7.16158e-30	7.35333e-29
CDC5L	protein_coding	ENSG00000096401	-0.0189182	5.75096	0.769037	0.828953
ITPR3	protein_coding	ENSG00000096433	2.09697	5.08871	7.68468e-113	3.11627e-111
ZNF184	protein_coding	ENSG00000096654	-0.984541	2.76692	9.24188e-21	6.85274e-20
DSP	protein_coding	ENSG00000096696	1.67873	5.11637	2.63068e-138	1.39355e-136
SIRT1	protein_coding	ENSG00000096717	0.208226	4.75609	0.00411551	0.00825536
HNRNPH3	protein_coding	ENSG00000096746	0.363008	7.67093	4.75126e-09	1.80591e-08
IFT74	protein_coding	ENSG00000096872	-0.66977	3.3772	8.76467e-13	4.31627e-12
JAK2	protein_coding	ENSG00000096968	-0.062963	4.17135	0.331777	0.420291
ABL1	protein_coding	ENSG00000097007	0.514759	7.61777	4.86895e-21	3.65638e-20
ACOT7	protein_coding	ENSG00000097021	0.182951	6.03844	0.000642165	0.00145676
SH3GLB1	protein_coding	ENSG00000097033	0.283091	7.07761	1.33822e-07	4.55015e-07
CDC7	protein_coding	ENSG00000097046	-1.23443	2.23519	3.52051e-29	3.54462e-28
SYDE2	protein_coding	ENSG00000097096	-0.083421	3.14565	0.297721	0.383257
PCSK5	protein_coding	ENSG00000099139	-0.222994	4.07779	0.000621417	0.00141297
SCD	protein_coding	ENSG00000099194	-0.343732	9.33573	1.09901e-09	4.39603e-09
TMED1	protein_coding	ENSG00000099203	-0.186547	4.40968	0.00669012	0.0129515
ABLIM1	protein_coding	ENSG00000099204	1.49361	4.4064	1.1292e-118	4.88212e-117
ERMP1	protein_coding	ENSG00000099219	-0.103627	3.64042	0.149269	0.212656
RAB18	protein_coding	ENSG00000099246	0.533684	6.68393	5.10226e-19	3.51029e-18
NRP1	protein_coding	ENSG00000099250	0.149907	6.99933	0.00623121	0.0121189
HSD17B7P2	transcribed_unprocessed_pseudogene	ENSG00000099251	-1.98258	-1.17212	5.42792e-16	3.21952e-15
PRTFDC1	protein_coding	ENSG00000099256	-0.171861	3.32503	0.0429086	0.0702598
PALMD	protein_coding	ENSG00000099260	-2.0225	0.715393	5.48053e-42	7.70331e-41
TSPAN15	protein_coding	ENSG00000099282	-0.14871	0.372918	0.345779	0.434842
H2AFY2	protein_coding	ENSG00000099284	-0.210366	4.25675	0.00175764	0.00374093
WASHC2A	protein_coding	ENSG00000099290	-0.228254	5.97676	5.2995e-05	0.000137881
MAST3	protein_coding	ENSG00000099308	-0.45752	3.30223	5.86613e-08	2.04989e-07
MZF1	protein_coding	ENSG00000099326	-0.0856034	3.13125	0.512467	0.601732
OCEL1	protein_coding	ENSG00000099330	-0.352368	2.0173	0.000298426	0.000706238
MYO9B	protein_coding	ENSG00000099331	0.87624	8.02223	2.2226e-63	4.65085e-62
KCNK6	protein_coding	ENSG00000099337	0.0556804	4.74211	0.394921	0.485531
CATSPERG	protein_coding	ENSG00000099338	0.465706	-2.83801	0.341834	0.430753
PSMD8	protein_coding	ENSG00000099341	0.219507	7.38373	2.23435e-05	6.07208e-05
FBXL19	protein_coding	ENSG00000099364	0.207737	4.96769	0.00161546	0.00345707
STX1B	protein_coding	ENSG00000099365	1.01976	2.23609	2.99923e-13	1.52468e-12
HSD3B7	protein_coding	ENSG00000099377	-0.197818	2.99551	0.0145066	0.0263457
SETD1A	protein_coding	ENSG00000099381	0.148233	4.9045	0.0180552	0.0322167
BCL7C	protein_coding	ENSG00000099385	-0.178538	5.30058	0.00147194	0.00316957
EFNA2	protein_coding	ENSG00000099617	2.37121	-2.42719	1.89393e-08	6.86721e-08
CIRBP	protein_coding	ENSG00000099622	-0.430631	6.6531	2.40543e-14	1.30962e-13
ATP5F1D	protein_coding	ENSG00000099624	0.0741125	5.21528	0.292362	0.377434
CBARP	protein_coding	ENSG00000099625	1.32053	4.64565	2.52528e-87	7.56299e-86
HNRNPM	protein_coding	ENSG00000099783	0.430551	8.03128	1.34148e-11	6.0926e-11
2019-03-02	protein_coding	ENSG00000099785	-0.332679	3.65468	1.222e-06	3.80512e-06
NDUFB7	protein_coding	ENSG00000099795	-0.0730132	5.0465	0.225925	0.303875
TECR	protein_coding	ENSG00000099797	-0.126748	4.98541	0.0593383	0.0940372
TIMM13	protein_coding	ENSG00000099800	0.279475	5.30477	1.28981e-06	4.00497e-06
CDC34	protein_coding	ENSG00000099804	0.377922	5.58388	9.48446e-12	4.35919e-11
MTAP	protein_coding	ENSG00000099810	1.21177	5.94484	4.9315e-85	1.43314e-83
CEP170B	protein_coding	ENSG00000099814	0.644574	6.701	5.12758e-23	4.19919e-22
POLR2E	protein_coding	ENSG00000099817	0.0467803	6.68449	0.374965	0.464624
POLRMT	protein_coding	ENSG00000099821	-0.124688	4.74686	0.0736036	0.113732
HCN2	protein_coding	ENSG00000099822	1.24594	3.3457	1.79523e-52	3.15418e-51
IZUMO4	protein_coding	ENSG00000099840	-0.0890998	-0.99606	0.789631	0.846804
RASSF7	protein_coding	ENSG00000099849	-1.03865	1.72955	7.58205e-17	4.67322e-16
GADD45B	protein_coding	ENSG00000099860	0.53214	5.80252	4.57881e-14	2.45427e-13
PALM	protein_coding	ENSG00000099864	-0.0591532	4.75727	0.366972	0.456708
MADCAM1	protein_coding	ENSG00000099866	-0.980368	-1.96687	0.0110986	0.0206041
IGF2-AS	antisense	ENSG00000099869	-0.670459	-1.8667	0.0716296	0.110964
MKNK2	protein_coding	ENSG00000099875	-0.477593	5.58767	3.09693e-17	1.95386e-16
ARVCF	protein_coding	ENSG00000099889	-1.05087	2.75405	5.72745e-33	6.4889e-32
TRMT2A	protein_coding	ENSG00000099899	0.0237928	4.40427	0.723693	0.790754
RANBP1	protein_coding	ENSG00000099901	0.192516	6.58801	0.000950666	0.00210437
ZDHHC8	protein_coding	ENSG00000099904	0.148191	5.93405	0.0416396	0.0683721
KLHL22	protein_coding	ENSG00000099910	-1.02275	3.35116	5.86859e-39	7.76608e-38
MED15	protein_coding	ENSG00000099917	0.0256415	6.35568	0.678156	0.750764
SERPIND1	protein_coding	ENSG00000099937	1.8428	-2.86351	0.00638714	0.0124003
SNAP29	protein_coding	ENSG00000099940	-0.316802	5.64053	1.27093e-08	4.67847e-08
CRKL	protein_coding	ENSG00000099942	-0.0604013	6.06313	0.255366	0.336311
LZTR1	protein_coding	ENSG00000099949	-0.181856	3.13445	0.0421224	0.0690941
MMP11	protein_coding	ENSG00000099953	-0.260525	2.60168	0.0038305	0.00771876
SMARCB1	protein_coding	ENSG00000099956	-0.108897	5.65491	0.0478534	0.0775177
P2RX6	protein_coding	ENSG00000099957	-0.277998	0.270901	0.0866306	0.131772
DERL3	protein_coding	ENSG00000099958	0.219876	-2.51892	0.587526	0.671154
BCL2L13	protein_coding	ENSG00000099968	-0.392702	6.23361	5.23153e-13	2.61059e-12
DDTL	protein_coding	ENSG00000099974	0.0703285	-2.07451	1	1
GSTT2	polymorphic_pseudogene	ENSG00000099984	-1.74196	-2.53995	0.000451403	0.00104334
CABIN1	protein_coding	ENSG00000099991	-0.351819	6.43964	4.4398e-09	1.6908e-08
TBC1D10A	protein_coding	ENSG00000099992	0.720571	3.43014	3.7107e-20	2.67498e-19
SUSD2	protein_coding	ENSG00000099994	-0.351851	-0.851402	0.264856	0.347235
SF3A1	protein_coding	ENSG00000099995	0.417682	6.64338	6.04594e-12	2.81697e-11
GGT5	protein_coding	ENSG00000099998	0.221133	0.412395	0.375762	0.46535
RNF215	protein_coding	ENSG00000099999	-0.125993	3.52848	0.0672009	0.104895
SEC14L2	protein_coding	ENSG00000100003	2.06985	3.33067	1.6643e-142	9.11745e-141
SPECC1L	protein_coding	ENSG00000100014	-0.725523	4.44185	3.13835e-27	2.99246e-26
PPIL2	protein_coding	ENSG00000100023	-0.368784	5.39615	1.83286e-11	8.24365e-11
YPEL1	protein_coding	ENSG00000100027	-0.918844	0.254668	9.10308e-09	3.39131e-08
SNRPD3	protein_coding	ENSG00000100028	0.206976	6.6481	0.00379576	0.00765488
PES1	protein_coding	ENSG00000100029	0.597984	6.47815	1.10878e-29	1.13385e-28
MAPK1	protein_coding	ENSG00000100030	0.259216	7.28616	8.86213e-07	2.80158e-06
GGT1	protein_coding	ENSG00000100031	-0.1062	0.210909	0.55785	0.643463
PPM1F	protein_coding	ENSG00000100034	0.110676	6.30801	0.0354511	0.0591971
SLC35E4	protein_coding	ENSG00000100036	1.344	3.85178	1.02803e-77	2.69458e-76
TOP3B	protein_coding	ENSG00000100038	-0.299891	3.96268	4.52079e-05	0.0001186
CYTH4	protein_coding	ENSG00000100055	-0.491929	-2.2322	0.225082	0.30288
ESS2	protein_coding	ENSG00000100056	-0.153605	4.08233	0.0182642	0.032573
CRYBB2P1	transcribed_unprocessed_pseudogene	ENSG00000100058	-0.230843	4.17962	0.000402127	0.000935574
MFNG	protein_coding	ENSG00000100060	1.30339	-3.24813	0.0132447	0.0242411
CARD10	protein_coding	ENSG00000100065	0.630105	4.45596	1.90456e-24	1.64719e-23
LRP5L	protein_coding	ENSG00000100068	0.0687951	1.82569	0.539704	0.626877
SLC25A1	protein_coding	ENSG00000100075	-0.136023	6.17147	0.0296029	0.0503223
GRK3	protein_coding	ENSG00000100077	0.707818	2.66575	4.81219e-14	2.5778e-13
PLA2G3	protein_coding	ENSG00000100078	-0.282241	1.51068	0.0312367	0.0527995
GGA1	protein_coding	ENSG00000100083	0.0258506	5.09568	0.672262	0.745737
HIRA	protein_coding	ENSG00000100084	0.238108	2.40185	0.0152442	0.0275746
SH3BP1	protein_coding	ENSG00000100092	0.335395	1.19278	0.0109131	0.020298
LGALS1	protein_coding	ENSG00000100097	-0.0208508	9.90748	0.726612	0.793305
HPS4	protein_coding	ENSG00000100099	-0.800247	4.02479	1.9299e-28	1.9072e-27
PIK3IP1	protein_coding	ENSG00000100100	-1.07984	4.07972	2.49277e-56	4.63845e-55
SRRD	protein_coding	ENSG00000100104	0.110945	4.02368	0.0983932	0.147389
PATZ1	protein_coding	ENSG00000100105	-0.953217	3.67493	3.83124e-40	5.1987e-39
TRIOBP	protein_coding	ENSG00000100106	-0.102225	7.13205	0.0500606	0.0807267
TFIP11	protein_coding	ENSG00000100109	0.35661	5.07564	1.53511e-09	6.06888e-09
GCAT	protein_coding	ENSG00000100116	-0.326649	3.62807	3.09839e-06	9.23237e-06
ANKRD54	protein_coding	ENSG00000100124	0.0736902	3.79216	0.338436	0.427377
EIF3L	protein_coding	ENSG00000100129	0.0163098	6.65505	0.76915	0.829024
SNU13	protein_coding	ENSG00000100138	0.193319	5.93633	0.00215696	0.00453393
MICALL1	protein_coding	ENSG00000100139	0.429423	6.17661	4.8217e-13	2.41153e-12
POLR2F	protein_coding	ENSG00000100142	0.243594	5.00308	0.00095545	0.00211417
CCDC134	protein_coding	ENSG00000100147	-1.01752	1.34361	3.60024e-15	2.04593e-14
DEPDC5	protein_coding	ENSG00000100150	-1.09063	1.80874	3.22529e-20	2.33555e-19
PICK1	protein_coding	ENSG00000100151	-0.480245	1.64984	2.43792e-05	6.58675e-05
TTC28	protein_coding	ENSG00000100154	-0.379867	5.41979	1.27411e-09	5.06315e-09
CENPM	protein_coding	ENSG00000100162	-0.293928	1.41096	0.0357789	0.0596707
2019-09-03	protein_coding	ENSG00000100167	-0.374573	-2.86404	0.530643	0.618369
KDELR3	protein_coding	ENSG00000100196	-0.230708	6.74616	3.18676e-05	8.50061e-05
DDX17	protein_coding	ENSG00000100201	0.0233559	8.72564	0.669959	0.743961
DMC1	protein_coding	ENSG00000100206	0.0449027	-1.18957	0.881915	0.922989
TCF20	protein_coding	ENSG00000100207	-0.47713	5.00843	6.1729e-16	3.65035e-15
HSCB	protein_coding	ENSG00000100209	-0.245044	2.46064	0.0152547	0.0275908
CBY1	protein_coding	ENSG00000100211	-0.465586	4.05695	4.895e-12	2.291e-11
TOMM22	protein_coding	ENSG00000100216	0.159567	5.76832	0.00614478	0.01196
XBP1	protein_coding	ENSG00000100219	0.0915801	7.02532	0.0813567	0.124491
RTCB	protein_coding	ENSG00000100220	0.157251	6.30598	0.00905708	0.0171203
JOSD1	protein_coding	ENSG00000100221	0.174024	5.6775	0.00185613	0.00393961
FBXO7	protein_coding	ENSG00000100225	0.158967	6.1734	0.0036992	0.00747468
GTPBP1	protein_coding	ENSG00000100226	0.131539	5.51536	0.0190331	0.0338008
POLDIP3	protein_coding	ENSG00000100227	0.12235	6.1706	0.0226243	0.0394322
RAB36	protein_coding	ENSG00000100228	-0.744723	2.23513	3.14427e-13	1.59657e-12
TIMP3	protein_coding	ENSG00000100234	2.05563	11.5269	2.56379e-291	3.61802e-289
PPP6R2	protein_coding	ENSG00000100239	-0.11481	5.85357	0.0401446	0.0661205
SBF1	protein_coding	ENSG00000100241	0.258237	6.74768	3.04657e-06	9.0896e-06
SUN2	protein_coding	ENSG00000100242	0.0103453	6.57949	0.846142	0.894304
CYB5R3	protein_coding	ENSG00000100243	-0.0104053	9.0862	0.853429	0.899958
DNAL4	protein_coding	ENSG00000100246	-0.210431	2.51112	0.0216614	0.0379376
C22orf31	protein_coding	ENSG00000100249	2.74149	-3.75084	9.58426e-06	2.70983e-05
LMF2	protein_coding	ENSG00000100258	-0.0215624	6.42037	0.745237	0.808784
RHBDD3	protein_coding	ENSG00000100263	-0.118036	3.84087	0.117467	0.172315
PACSIN2	protein_coding	ENSG00000100266	0.250868	6.22784	2.85012e-06	8.5257e-06
TTLL1	protein_coding	ENSG00000100271	-0.671345	2.89984	7.53929e-18	4.90568e-17
RASL10A	protein_coding	ENSG00000100276	7.34057	-1.88354	4.21293e-33	4.78841e-32
AP1B1	protein_coding	ENSG00000100280	-0.0650885	6.67747	0.260066	0.341667
HMGXB4	protein_coding	ENSG00000100281	0.105146	5.22731	0.0629296	0.0989001
TOM1	protein_coding	ENSG00000100284	0.0264019	5.22765	0.648005	0.724523
NEFH	protein_coding	ENSG00000100285	-0.153326	1.71041	0.190233	0.262288
CHKB	protein_coding	ENSG00000100288	0.664046	-2.40989	0.14723	0.210142
HMOX1	protein_coding	ENSG00000100292	3.24582	6.0559	0	0
MCAT	protein_coding	ENSG00000100294	-0.00368593	2.74513	0.977585	0.998645
THOC5	protein_coding	ENSG00000100296	-0.00565428	4.70469	0.923694	0.955209
MCM5	protein_coding	ENSG00000100297	-0.407129	5.08054	1.45511e-11	6.58357e-11
ARSA	protein_coding	ENSG00000100299	-0.199717	4.54675	0.00126683	0.0027565
TSPO	protein_coding	ENSG00000100300	-0.0472007	5.93517	0.405829	0.496382
RASD2	protein_coding	ENSG00000100302	3.50337	2.42092	5.97083e-61	1.20372e-59
TTLL12	protein_coding	ENSG00000100304	-0.292645	4.73602	1.19972e-05	3.35229e-05
CBX7	protein_coding	ENSG00000100307	-0.793632	2.27776	1.07829e-10	4.61228e-10
PDGFB	protein_coding	ENSG00000100311	4.25677	1.78593	2.23743e-193	1.81881e-191
CABP7	protein_coding	ENSG00000100314	3.69375	-3.05641	3.84192e-10	1.5816e-09
RPL3	protein_coding	ENSG00000100316	0.000252045	9.88611	0.99665	1
ZMAT5	protein_coding	ENSG00000100319	-0.300933	3.17482	0.000470197	0.00108479
RBFOX2	protein_coding	ENSG00000100320	0.0614984	8.07137	0.232954	0.311523
SYNGR1	protein_coding	ENSG00000100321	-0.140334	4.69577	0.0167477	0.0300568
TAB1	protein_coding	ENSG00000100324	-1.40903	4.25255	2.85687e-87	8.51269e-86
ASCC2	protein_coding	ENSG00000100325	0.122803	5.81124	0.0242691	0.0420289
MTMR3	protein_coding	ENSG00000100330	-0.481581	5.47866	1.6104e-17	1.03263e-16
MIEF1	protein_coding	ENSG00000100335	0.358831	5.47425	2.5966e-10	1.08309e-09
APOL1	protein_coding	ENSG00000100342	-0.18145	2.42944	0.191736	0.264009
PNPLA3	protein_coding	ENSG00000100344	-1.01467	2.52998	4.82438e-31	5.15146e-30
MYH9	protein_coding	ENSG00000100345	0.384369	11.5943	2.27638e-13	1.16697e-12
SAMM50	protein_coding	ENSG00000100347	-0.111097	4.53954	0.0710072	0.110087
TXN2	protein_coding	ENSG00000100348	-0.114208	5.49421	0.0435457	0.0712169
FOXRED2	protein_coding	ENSG00000100350	-0.423079	3.14676	1.55877e-06	4.80003e-06
EIF3D	protein_coding	ENSG00000100353	0.189446	7.50573	0.000397903	0.000926848
TNRC6B	protein_coding	ENSG00000100354	-1.62065	4.0392	8.17625e-106	3.04924e-104
SGSM3	protein_coding	ENSG00000100359	0.203179	-2.62586	0.745809	0.809356
IFT27	protein_coding	ENSG00000100360	-0.576695	3.65555	4.31078e-16	2.56553e-15
KIAA0930	protein_coding	ENSG00000100364	0.120685	6.30299	0.0252499	0.0435693
SLC25A17	protein_coding	ENSG00000100372	0.483193	3.94624	9.46475e-13	4.65194e-12
FAM118A	protein_coding	ENSG00000100376	0.764973	3.98847	3.55504e-30	3.69322e-29
KCTD17	protein_coding	ENSG00000100379	0.186182	4.18187	0.00318918	0.00650598
ST13	protein_coding	ENSG00000100380	0.0815385	8.09311	0.173465	0.242005
RBX1	protein_coding	ENSG00000100387	0.00955002	4.36301	0.89533	0.932492
EP300	protein_coding	ENSG00000100393	-0.184761	6.37546	0.00801788	0.0153135
L3MBTL2	protein_coding	ENSG00000100395	-0.451346	4.38271	4.00863e-13	2.01517e-12
CHADL	protein_coding	ENSG00000100399	-0.547366	-1.80766	0.121423	0.177368
RANGAP1	protein_coding	ENSG00000100401	0.119226	7.69017	0.0206837	0.0364205
ZC3H7B	protein_coding	ENSG00000100403	-0.00667306	8.66388	0.900833	0.936564
PHF5A	protein_coding	ENSG00000100410	0.371462	4.31393	3.37077e-08	1.19904e-07
ACO2	protein_coding	ENSG00000100412	0.032171	6.16958	0.550626	0.637088
POLR3H	protein_coding	ENSG00000100413	-0.47387	5.65588	2.44177e-18	1.63155e-17
TRMU	protein_coding	ENSG00000100416	0.208142	4.43398	0.000834368	0.00186001
PMM1	protein_coding	ENSG00000100417	-0.217454	4.59561	0.000452458	0.00104564
DESI1	protein_coding	ENSG00000100418	0.23561	5.82877	2.32872e-05	6.31492e-05
CERK	protein_coding	ENSG00000100422	1.12067	6.90394	5.6117e-87	1.6665e-85
BRD1	protein_coding	ENSG00000100425	0.49777	5.44787	8.37086e-20	5.93497e-19
ZBED4	protein_coding	ENSG00000100426	0.694973	5.41339	1.35644e-35	1.66048e-34
MLC1	protein_coding	ENSG00000100427	-0.0916419	-1.44431	0.909099	0.94338
HDAC10	protein_coding	ENSG00000100429	0.899251	-2.00727	0.0593199	0.0940165
ABHD4	protein_coding	ENSG00000100439	0.0220911	5.59715	0.73346	0.798705
KHNYN	protein_coding	ENSG00000100441	-0.356621	5.67382	2.30338e-10	9.65808e-10
FKBP3	protein_coding	ENSG00000100442	-0.0242937	5.65723	0.657778	0.733118
SDR39U1	protein_coding	ENSG00000100445	-0.0204373	3.20347	0.818033	0.870332
RBM23	protein_coding	ENSG00000100461	-0.0538289	4.98047	0.350109	0.439286
PRMT5	protein_coding	ENSG00000100462	-0.12814	5.99835	0.0169794	0.0304387
COCH	protein_coding	ENSG00000100473	0.886999	-2.64743	0.050789	0.0817892
AP4S1	protein_coding	ENSG00000100478	0.0720382	2.6126	0.427125	0.517123
POLE2	protein_coding	ENSG00000100479	-0.329149	1.27318	0.0172388	0.0308598
VCPKMT	protein_coding	ENSG00000100483	0.594325	2.40252	3.39395e-08	1.20704e-07
SOS2	protein_coding	ENSG00000100485	0.250373	5.41063	5.22023e-05	0.000135959
CDKL1	protein_coding	ENSG00000100490	-1.49669	2.48126	2.14712e-46	3.30498e-45
NIN	protein_coding	ENSG00000100503	-0.266596	6.68823	2.73468e-06	8.19985e-06
PYGL	protein_coding	ENSG00000100504	-0.130833	5.3571	0.0249225	0.0430632
PSMC6	protein_coding	ENSG00000100519	0.49429	6.34192	1.10939e-11	5.06853e-11
GNPNAT1	protein_coding	ENSG00000100522	1.19567	6.87577	3.66285e-86	1.08048e-84
DDHD1	protein_coding	ENSG00000100523	0.36101	5.20884	1.1287e-09	4.5056e-09
CDKN3	protein_coding	ENSG00000100526	-0.345742	2.84249	0.000488502	0.00112452
CNIH1	protein_coding	ENSG00000100528	0.305818	6.42886	2.56855e-07	8.528e-07
CGRRF1	protein_coding	ENSG00000100532	0.28951	2.61057	0.00121099	0.00264086
ATP6V1D	protein_coding	ENSG00000100554	0.567545	6.41741	2.50577e-19	1.74779e-18
PLEK2	protein_coding	ENSG00000100558	2.36296	1.13384	1.46583e-31	1.58634e-30
PIGH	protein_coding	ENSG00000100564	-0.154925	2.33068	0.104361	0.155222
PSMA3	protein_coding	ENSG00000100567	0.238434	5.59223	9.06234e-05	0.00022942
VTI1B	protein_coding	ENSG00000100568	-7.84543e-05	5.63094	1	1
TIMM9	protein_coding	ENSG00000100575	0.34409	3.54303	2.33419e-05	6.3288e-05
GSTZ1	protein_coding	ENSG00000100577	-0.151992	2.1336	0.103044	0.153483
KIAA0586	protein_coding	ENSG00000100578	-0.818183	3.78747	8.3718e-32	9.11596e-31
TMED8	protein_coding	ENSG00000100580	0.0456508	3.61097	0.57503	0.659527
SAMD15	protein_coding	ENSG00000100583	0.0967639	-1.10968	0.793032	0.84942
AHSA1	protein_coding	ENSG00000100591	0.446883	6.62127	7.79126e-13	3.8498e-12
DAAM1	protein_coding	ENSG00000100592	-0.114057	3.1082	0.159074	0.224629
SPTLC2	protein_coding	ENSG00000100596	0.731306	6.58459	4.56978e-39	6.06553e-38
RIN3	protein_coding	ENSG00000100599	-0.0872858	4.43487	0.258605	0.339976
LGMN	protein_coding	ENSG00000100600	-0.01695	4.99702	0.768207	0.828362
ALKBH1	protein_coding	ENSG00000100601	0.602093	3.35396	1.6933e-14	9.29653e-14
SNW1	protein_coding	ENSG00000100603	0.190543	6.15491	0.00300325	0.00615372
ITPK1	protein_coding	ENSG00000100605	0.347346	4.34316	1.57647e-07	5.32536e-07
DHRS7	protein_coding	ENSG00000100612	0.458473	5.96432	1.66109e-12	8.06317e-12
PPM1A	protein_coding	ENSG00000100614	-0.0455813	5.36991	0.418312	0.508793
SIX4	protein_coding	ENSG00000100625	-0.497447	4.96534	4.65607e-17	2.90943e-16
GALNT16	protein_coding	ENSG00000100626	0.919088	2.80764	1.13114e-19	7.97491e-19
ASB2	protein_coding	ENSG00000100628	3.7025	0.0119577	1.34029e-53	2.38574e-52
CEP128	protein_coding	ENSG00000100629	0.0135809	2.66542	0.899677	0.935914
ERH	protein_coding	ENSG00000100632	0.0521659	5.6619	0.418171	0.508691
HIF1A	protein_coding	ENSG00000100644	0.964884	8.90079	1.18545e-71	2.83737e-70
SUSD6	protein_coding	ENSG00000100647	1.4759	5.61598	3.80111e-158	2.37772e-156
SRSF5	protein_coding	ENSG00000100650	0.503402	7.53328	1.81998e-19	1.275e-18
EIF5	protein_coding	ENSG00000100664	0.0278587	8.13499	0.631591	0.710178
DICER1	protein_coding	ENSG00000100697	0.326593	6.21789	2.07129e-08	7.49333e-08
ZFYVE21	protein_coding	ENSG00000100711	-0.348215	5.2574	2.74116e-09	1.06372e-08
MTHFD1	protein_coding	ENSG00000100714	-0.222739	5.56175	0.000122019	0.000303457
ZC3H14	protein_coding	ENSG00000100722	0.257066	6.14936	5.15629e-06	1.49995e-05
TELO2	protein_coding	ENSG00000100726	-0.00942703	4.38069	0.887755	0.926956
PCNX1	protein_coding	ENSG00000100731	0.463011	6.53829	9.72212e-16	5.69194e-15
BDKRB1	protein_coding	ENSG00000100739	2.49979	4.88966	0	0
GSKIP	protein_coding	ENSG00000100744	0.475137	4.31729	1.03432e-11	4.73906e-11
VRK1	protein_coding	ENSG00000100749	0.148118	3.3357	0.0672901	0.105007
PSMC1	protein_coding	ENSG00000100764	0.337973	7.14021	5.07539e-08	1.78311e-07
PAPLN	protein_coding	ENSG00000100767	-1.20942	0.30035	7.03336e-10	2.85215e-09
RPS6KA5	protein_coding	ENSG00000100784	-0.184317	-0.141123	0.328453	0.416768
PPP4R3A	protein_coding	ENSG00000100796	0.302316	6.33874	3.41537e-08	1.21417e-07
C14orf93	protein_coding	ENSG00000100802	-1.35884	1.0595	8.07237e-23	6.55602e-22
PSMB5	protein_coding	ENSG00000100804	0.0866252	6.77549	0.120553	0.176302
YY1	protein_coding	ENSG00000100811	0.221968	6.65788	2.56927e-05	6.92467e-05
ACIN1	protein_coding	ENSG00000100813	0.200753	7.72483	0.000117372	0.000292559
CCNB1IP1	protein_coding	ENSG00000100814	0.159769	4.14473	0.0162116	0.0291898
TRIP11	protein_coding	ENSG00000100815	-0.256084	6.06318	1.73297e-05	4.75496e-05
APEX1	protein_coding	ENSG00000100823	-0.172742	6.62289	0.00104118	0.00229122
PABPN1	protein_coding	ENSG00000100836	0.419746	4.72122	1.22558e-08	4.5153e-08
EFS	protein_coding	ENSG00000100842	-0.257553	4.12792	0.000119094	0.000296641
ARHGAP5	protein_coding	ENSG00000100852	0.311524	6.65871	4.3994e-09	1.67614e-08
CINP	protein_coding	ENSG00000100865	-0.189209	4.98312	0.00279507	0.00575724
SRP54	protein_coding	ENSG00000100883	0.270928	6.60633	1.56455e-05	4.31702e-05
CHD8	protein_coding	ENSG00000100888	-0.124002	6.44236	0.0245173	0.0424212
PCK2	protein_coding	ENSG00000100889	-0.680678	5.37861	1.18882e-33	1.37244e-32
KIAA0391	protein_coding	ENSG00000100890	0.201489	2.57851	0.0273015	0.0467299
DCAF11	protein_coding	ENSG00000100897	-0.280602	4.33664	2.5443e-05	6.86052e-05
PSMA6	protein_coding	ENSG00000100902	0.438943	2.20681	0.00076543	0.00171522
NFKBIA	protein_coding	ENSG00000100906	1.54232	5.54146	2.2551e-177	1.56614e-175
EMC9	protein_coding	ENSG00000100908	-0.345619	1.68127	0.00188108	0.00398872
PSME2	protein_coding	ENSG00000100911	0.0533974	5.17933	0.354084	0.443548
BRMS1L	protein_coding	ENSG00000100916	0.0904995	3.43548	0.248931	0.329196
REC8	protein_coding	ENSG00000100918	-0.130434	-0.462558	0.68285	0.754824
TM9SF1	protein_coding	ENSG00000100926	0.263002	2.67492	0.00229168	0.00478916
SEC23A	protein_coding	ENSG00000100934	0.0746061	8.09064	0.175806	0.24483
GMPR2	protein_coding	ENSG00000100938	-0.387506	4.80101	5.71374e-10	2.3288e-09
PNN	protein_coding	ENSG00000100941	0.652198	7.04106	1.3658e-33	1.57366e-32
RABGGTA	protein_coding	ENSG00000100949	-0.0647449	3.96336	0.362564	0.452116
NFATC4	protein_coding	ENSG00000100968	-0.702762	4.2684	4.69208e-29	4.70542e-28
PLTP	protein_coding	ENSG00000100979	-0.0307794	4.78556	0.633028	0.711414
PCIF1	protein_coding	ENSG00000100982	-0.774102	3.69096	1.23529e-22	9.96369e-22
GSS	protein_coding	ENSG00000100983	-0.139063	5.22862	0.012612	0.023163
TRPC4AP	protein_coding	ENSG00000100991	-0.166983	6.7012	0.00143127	0.00308876
PYGB	protein_coding	ENSG00000100994	-0.0888181	7.21554	0.0940228	0.141661
ABHD12	protein_coding	ENSG00000100997	0.0656703	6.10326	0.239496	0.318774
PROCR	protein_coding	ENSG00000101000	0.104806	3.64515	0.162578	0.229099
GINS1	protein_coding	ENSG00000101003	-0.374777	2.86113	0.00013246	0.000327436
NINL	protein_coding	ENSG00000101004	-0.708723	3.22277	1.5399e-17	9.88498e-17
UQCC1	protein_coding	ENSG00000101019	-0.063072	5.13223	0.288593	0.373169
ZMYND8	protein_coding	ENSG00000101040	0.470425	5.43143	1.77958e-17	1.1378e-16
IFT52	protein_coding	ENSG00000101052	-0.272533	4.23841	1.10291e-05	3.09798e-05
MYBL2	protein_coding	ENSG00000101057	0.194294	4.45137	0.00471822	0.00936424
NDRG3	protein_coding	ENSG00000101079	-0.231414	4.88063	0.000245735	0.000587367
RAB5IF	protein_coding	ENSG00000101084	0.497882	4.57529	7.67156e-06	2.19081e-05
NFATC2	protein_coding	ENSG00000101096	5.76361	2.94899	0	0
PABPC1L	protein_coding	ENSG00000101104	-0.372512	3.18336	0.0592607	0.0939395
STK4	protein_coding	ENSG00000101109	0.639823	5.62107	3.9227e-31	4.19372e-30
SALL4	protein_coding	ENSG00000101115	0.329693	-1.99244	0.374814	0.464469
ADNP	protein_coding	ENSG00000101126	0.000281321	6.0932	0.994799	1
PFDN4	protein_coding	ENSG00000101132	-0.0238238	3.9947	0.787822	0.845327
DOK5	protein_coding	ENSG00000101134	-0.00375885	-1.96478	1	1
[truncated: 15,641 more rows]

## Sheet: Q_to_6h
gene_names	gene_biotype	gene_id	logFC	logCPM	PValue	FDR
TSPAN6	protein_coding	ENSG00000000003	-0.288387	4.21672	2.5506e-05	5.83636e-05
DPM1	protein_coding	ENSG00000000419	0.532578	5.97338	0.000190028	0.000396745
SCYL3	protein_coding	ENSG00000000457	-0.305717	2.94501	0.00027074	0.000556692
C1orf112	protein_coding	ENSG00000000460	0.123836	2.30266	0.208128	0.266498
CFH	protein_coding	ENSG00000000971	-0.275616	5.69231	0.000157827	0.000332586
FUCA2	protein_coding	ENSG00000001036	0.00911058	6.95646	0.861859	0.897579
GCLC	protein_coding	ENSG00000001084	-0.718982	5.36653	3.86294e-28	2.83926e-27
NFYA	protein_coding	ENSG00000001167	0.551288	5.47714	7.16563e-22	4.19104e-21
STPG1	protein_coding	ENSG00000001460	0.549266	3.59873	1.72422e-15	7.73333e-15
NIPAL3	protein_coding	ENSG00000001461	-0.586481	6.90465	6.46496e-29	4.87775e-28
LAS1L	protein_coding	ENSG00000001497	0.140159	4.8126	0.0197532	0.0313436
ENPP4	protein_coding	ENSG00000001561	-0.343727	-2.64737	0.492162	0.563713
SEMA3F	protein_coding	ENSG00000001617	0.812832	5.86129	1.18805e-46	1.38973e-45
CFTR	protein_coding	ENSG00000001626	-2.14924	-1.68913	4.45795e-07	1.18789e-06
ANKIB1	protein_coding	ENSG00000001629	-0.100547	5.75521	0.0651291	0.0937858
CYP51A1	protein_coding	ENSG00000001630	-0.628065	2.95515	3.28328e-12	1.24259e-11
KRIT1	protein_coding	ENSG00000001631	-0.0405438	2.04505	0.709806	0.765341
RAD52	protein_coding	ENSG00000002016	-0.0433826	2.28445	0.644763	0.706875
MYH16	transcribed_unitary_pseudogene	ENSG00000002079	3.99799	-2.31753	1.82868e-22	1.09349e-21
BAD	protein_coding	ENSG00000002330	-0.0883977	4.6378	0.153987	0.203486
LAP3	protein_coding	ENSG00000002549	0.25344	5.72422	1.73685e-05	4.03663e-05
CD99	protein_coding	ENSG00000002586	-0.164168	8.50064	0.0046585	0.00817346
WNT16	protein_coding	ENSG00000002745	-0.267299	3.84544	0.000610232	0.0012053
HECW1	protein_coding	ENSG00000002746	-1.29046	1.3103	9.34337e-25	6.09756e-24
MAD1L1	protein_coding	ENSG00000002822	0.0342899	4.71292	0.56997	0.638665
LASP1	protein_coding	ENSG00000002834	-0.0922025	9.57068	0.100985	0.139301
SNX11	protein_coding	ENSG00000002919	0.563369	3.64153	2.82755e-12	1.07542e-11
TMEM176A	protein_coding	ENSG00000002933	-0.514347	3.22204	8.98212e-08	2.52461e-07
M6PR	protein_coding	ENSG00000003056	0.503501	6.67162	2.73138e-20	1.50145e-19
KLHL13	protein_coding	ENSG00000003096	-1.68336	2.64145	1.11218e-58	1.6445e-57
CYP26B1	protein_coding	ENSG00000003137	-2.73614	1.42344	3.62462e-64	5.8498e-63
DBNDD1	protein_coding	ENSG00000003249	-0.0447761	4.14154	0.5228	0.593481
ALS2	protein_coding	ENSG00000003393	-0.468032	5.87919	5.16086e-18	2.57532e-17
CASP10	protein_coding	ENSG00000003400	-1.65722	-0.510998	4.87272e-13	1.92508e-12
CFLAR	protein_coding	ENSG00000003402	0.218573	6.48188	2.87469e-05	6.54064e-05
TFPI	protein_coding	ENSG00000003436	-0.5534	7.16988	1.76138e-23	1.09674e-22
NDUFAF7	protein_coding	ENSG00000003509	-0.340374	3.63246	4.56729e-06	1.12101e-05
RBM5	protein_coding	ENSG00000003756	-0.4085	6.2515	8.84806e-14	3.63061e-13
MTMR7	protein_coding	ENSG00000003987	0.163038	-1.68436	0.730286	0.784021
SLC7A2	protein_coding	ENSG00000003989	0.522235	7.46659	3.9762e-18	1.99545e-17
ARF5	protein_coding	ENSG00000004059	0.0102639	5.23455	0.877419	0.910611
SARM1	protein_coding	ENSG00000004139	-0.961685	3.9258	4.09951e-38	3.92591e-37
POLDIP2	protein_coding	ENSG00000004142	0.052883	6.73451	0.307825	0.376537
PLXND1	protein_coding	ENSG00000004399	0.313497	6.57252	7.94821e-09	2.41402e-08
AK2	protein_coding	ENSG00000004455	-0.0247954	6.3142	0.655526	0.716537
FKBP4	protein_coding	ENSG00000004478	0.503053	5.94293	4.04569e-15	1.78014e-14
KDM1A	protein_coding	ENSG00000004487	0.0707498	6.35738	0.208055	0.26645
RBM6	protein_coding	ENSG00000004534	-0.0196465	6.13024	0.716777	0.771301
CAMKK1	protein_coding	ENSG00000004660	1.22958	2.41932	1.23559e-41	1.28665e-40
RECQL	protein_coding	ENSG00000004700	0.648708	6.04565	3.97074e-26	2.74037e-25
VPS50	protein_coding	ENSG00000004766	-0.42048	4.02487	4.58856e-07	1.22085e-06
HSPB6	protein_coding	ENSG00000004776	-0.426587	5.78302	2.34563e-07	6.39718e-07
ARHGAP33	protein_coding	ENSG00000004777	0.368123	1.90246	0.0183347	0.0292638
NDUFAB1	protein_coding	ENSG00000004779	0.439064	4.9909	6.56331e-14	2.71904e-13
PDK4	protein_coding	ENSG00000004799	-3.7857	-3.10499	2.84751e-09	8.95846e-09
ZMYND10	protein_coding	ENSG00000004838	0.226659	-2.54059	0.661781	0.722345
SLC25A13	protein_coding	ENSG00000004864	0.857383	4.12063	1.98106e-35	1.76227e-34
ST7	protein_coding	ENSG00000004866	0.0971137	4.58104	0.126229	0.170614
CDC27	protein_coding	ENSG00000004897	0.311508	7.06466	4.09643e-08	1.1817e-07
HCCS	protein_coding	ENSG00000004961	0.761987	5.16948	1.1097e-37	1.05073e-36
DVL2	protein_coding	ENSG00000004975	-1.05368	4.86057	3.2779e-72	5.90023e-71
UPF1	protein_coding	ENSG00000005007	0.385902	6.98547	8.82662e-12	3.24649e-11
SKAP2	protein_coding	ENSG00000005020	-0.320646	4.86381	1.44957e-07	4.00791e-07
SLC25A5	protein_coding	ENSG00000005022	0.584765	6.38196	2.50634e-27	1.79942e-26
MCUB	protein_coding	ENSG00000005059	0.0783656	2.62718	0.419333	0.492675
POLR2J	protein_coding	ENSG00000005075	0.0746042	5.1274	0.283306	0.350138
DHX33	protein_coding	ENSG00000005100	0.582888	5.29924	1.18338e-18	6.06124e-18
MEOX1	protein_coding	ENSG00000005102	4.46239	-2.11655	9.98626e-21	5.60476e-20
LIG3	protein_coding	ENSG00000005156	0.0345604	4.86723	0.561041	0.629846
RPAP3	protein_coding	ENSG00000005175	0.0988097	5.19192	0.153859	0.203347
REXO5	protein_coding	ENSG00000005189	-0.685887	0.895858	6.71989e-06	1.62226e-05
CIAPIN1	protein_coding	ENSG00000005194	0.453411	4.50711	7.99114e-14	3.29277e-13
SPPL2B	protein_coding	ENSG00000005206	-0.318321	3.96473	0.0234652	0.0367543
FAM214B	protein_coding	ENSG00000005238	1.43723	5.72714	9.61191e-111	2.69133e-109
COPZ2	protein_coding	ENSG00000005243	-0.314447	4.64759	6.22217e-07	1.63917e-06
PRKAR2B	protein_coding	ENSG00000005249	-0.434063	3.44774	2.71338e-05	6.19118e-05
MSL3	protein_coding	ENSG00000005302	-0.126099	4.40282	0.0520662	0.07648
CREBBP	protein_coding	ENSG00000005339	-0.591358	6.40688	2.19816e-21	1.26469e-20
TSPOAP1	protein_coding	ENSG00000005379	-1.36213	0.599487	1.39245e-13	5.66093e-13
GCFC2	protein_coding	ENSG00000005436	-0.10265	3.21744	0.226644	0.287151
WDR54	protein_coding	ENSG00000005448	-0.469375	1.98463	2.51598e-05	5.76014e-05
CROT	protein_coding	ENSG00000005469	-1.26977	3.99991	3.93141e-56	5.5569e-55
KMT2E	protein_coding	ENSG00000005483	-0.381451	6.33107	5.58985e-12	2.08038e-11
RHBDD2	protein_coding	ENSG00000005486	-0.360897	4.86403	1.35794e-07	3.76356e-07
SOX8	protein_coding	ENSG00000005513	2.23996	1.23727	4.94978e-28	3.62149e-27
IBTK	protein_coding	ENSG00000005700	0.207417	6.55211	0.00200654	0.003704
ZNF195	protein_coding	ENSG00000005801	0.444202	4.06508	2.56483e-10	8.61127e-10
MYCBP2	protein_coding	ENSG00000005810	-0.464542	6.00146	7.82661e-11	2.7245e-10
FBXL3	protein_coding	ENSG00000005812	0.105495	5.55324	0.0931593	0.129488
PDK2	protein_coding	ENSG00000005882	-1.42909	4.12951	7.66077e-106	2.05686e-104
ITGA3	protein_coding	ENSG00000005884	0.0773703	7.7015	0.155406	0.205166
ZFX	protein_coding	ENSG00000005889	-0.185307	5.14641	0.00124625	0.00236512
LAMP2	protein_coding	ENSG00000005893	0.0855066	7.38123	0.121751	0.165041
ITGA2B	protein_coding	ENSG00000005961	0.481148	-3.39214	0.800999	0.846592
GDE1	protein_coding	ENSG00000006007	-0.312374	6.45687	5.88078e-08	1.67615e-07
REX1BD	protein_coding	ENSG00000006015	-0.188069	4.14973	0.00486016	0.00850106
CRLF1	protein_coding	ENSG00000006016	1.58779	4.65272	1.24043e-155	5.4431e-154
OSBPL7	protein_coding	ENSG00000006025	-0.697873	0.957119	1.6068e-06	4.08738e-06
TMEM98	protein_coding	ENSG00000006042	-0.221405	6.13359	3.65118e-05	8.20573e-05
MAP3K14	protein_coding	ENSG00000006062	-0.865989	3.81397	5.21148e-26	3.57428e-25
TMEM132A	protein_coding	ENSG00000006118	0.71676	6.06445	2.28916e-21	1.31619e-20
AP2B1	protein_coding	ENSG00000006125	-0.202697	8.09235	0.000110265	0.000235881
ZNF263	protein_coding	ENSG00000006194	0.412018	4.87535	3.71269e-11	1.31642e-10
CX3CL1	protein_coding	ENSG00000006210	-4.07781	-3.87762	1.55387e-05	3.62618e-05
SPATA20	protein_coding	ENSG00000006282	-0.539915	5.0503	4.06713e-18	2.03935e-17
CACNA1G	protein_coding	ENSG00000006283	0.990039	-1.32818	0.000470401	0.000940695
TNFRSF12A	protein_coding	ENSG00000006327	1.39076	8.01864	9.52896e-149	3.90909e-147
MAP3K9	protein_coding	ENSG00000006432	0.128363	-2.44984	0.751752	0.803935
RALA	protein_coding	ENSG00000006451	0.708306	6.6103	7.47975e-24	4.71224e-23
BAIAP2L1	protein_coding	ENSG00000006453	0.158815	3.55785	0.0358676	0.0544356
KDM7A	protein_coding	ENSG00000006459	1.4694	4.45831	2.84871e-100	7.32524e-99
ETV1	protein_coding	ENSG00000006468	-0.740584	4.13156	4.36282e-22	2.56715e-21
AGK	protein_coding	ENSG00000006530	0.236197	4.66038	8.65961e-05	0.000187338
ALDH3B1	protein_coding	ENSG00000006534	-0.991843	4.27554	4.60556e-50	5.77414e-49
PHTF2	protein_coding	ENSG00000006576	-0.0763951	6.9225	0.161448	0.212295
FARP2	protein_coding	ENSG00000006607	0.813134	5.51665	1.27095e-46	1.48572e-45
GGCT	protein_coding	ENSG00000006625	0.462936	1.80933	1.48023e-05	3.46257e-05
DBF4	protein_coding	ENSG00000006634	0.260622	3.90927	0.000394389	0.000795542
TBXA2R	protein_coding	ENSG00000006638	0.653127	1.11653	3.26175e-07	8.79104e-07
IFRD1	protein_coding	ENSG00000006652	0.381461	5.60947	1.29009e-11	4.69512e-11
COX10	protein_coding	ENSG00000006695	0.42026	3.46112	1.1169e-08	3.3507e-08
GTF2IRD1	protein_coding	ENSG00000006704	-0.623551	4.21404	3.11793e-21	1.78167e-20
PAF1	protein_coding	ENSG00000006712	-0.410196	6.11284	2.7518e-14	1.16323e-13
VPS41	protein_coding	ENSG00000006715	-0.29839	5.49002	3.43761e-07	9.25087e-07
ARHGAP44	protein_coding	ENSG00000006740	0.407014	0.0845788	0.0255124	0.039749
ELAC2	protein_coding	ENSG00000006744	0.297287	5.65708	6.27181e-08	1.78443e-07
ARSD	protein_coding	ENSG00000006756	-0.706747	3.86552	2.95952e-26	2.0497e-25
PNPLA4	protein_coding	ENSG00000006757	-0.265675	2.20457	0.00484692	0.00847959
MYH13	protein_coding	ENSG00000006788	1.04868	-3.43076	0.317889	0.387584
ADIPOR2	protein_coding	ENSG00000006831	-0.271941	6.53339	4.83815e-07	1.28493e-06
CDKL3	protein_coding	ENSG00000006837	-0.528009	-0.498507	0.0133685	0.0218373
MARK4	protein_coding	ENSG00000007047	0.797679	5.97165	2.99523e-48	3.62386e-47
CCDC124	protein_coding	ENSG00000007080	0.0171134	5.97954	0.797277	0.843416
PAFAH1B1	protein_coding	ENSG00000007168	0.212138	7.30244	4.86917e-05	0.000108327
KIAA0100	protein_coding	ENSG00000007202	-0.0330459	7.46828	0.532569	0.602637
GAS7	protein_coding	ENSG00000007237	-0.308826	4.95471	4.47732e-08	1.28821e-07
TRAPPC6A	protein_coding	ENSG00000007255	-0.242443	0.836088	0.0853234	0.119728
ST7L	protein_coding	ENSG00000007341	0.248108	4.33031	8.83775e-05	0.000191004
RPUSD1	protein_coding	ENSG00000007376	0.902514	4.56208	1.12041e-51	1.4543e-50
RHBDF1	protein_coding	ENSG00000007384	0.110675	5.98068	0.102643	0.141389
LUC7L	protein_coding	ENSG00000007392	0.134614	5.29483	0.0381602	0.0576274
BAIAP3	protein_coding	ENSG00000007516	-0.799653	-0.85603	0.00110178	0.00210567
TSR3	protein_coding	ENSG00000007520	0.184142	5.52907	0.00160865	0.00300887
PIGQ	protein_coding	ENSG00000007541	-0.043068	3.47741	0.621191	0.686107
CRAMP1	protein_coding	ENSG00000007545	-0.101599	3.5181	0.254609	0.318442
TEAD3	protein_coding	ENSG00000007866	0.174279	6.39264	0.00374081	0.00665403
DNAJC11	protein_coding	ENSG00000007923	0.230469	6.0785	3.2059e-05	7.25212e-05
FMO3	protein_coding	ENSG00000007933	-1.74985	0.838098	2.19302e-29	1.67394e-28
MYLIP	protein_coding	ENSG00000007944	-0.738296	1.91842	4.28513e-10	1.42086e-09
E2F2	protein_coding	ENSG00000007968	-1.08364	0.657403	1.6485e-09	5.27282e-09
PSMB1	protein_coding	ENSG00000008018	0.0712015	7.01837	0.420902	0.494124
SYN1	protein_coding	ENSG00000008056	2.52554	2.17745	2.42321e-91	5.66916e-90
JARID2	protein_coding	ENSG00000008083	1.54886	5.75964	3.50165e-150	1.4672e-148
CDKL5	protein_coding	ENSG00000008086	0.188286	4.94933	0.00185182	0.00343601
CAMK1G	protein_coding	ENSG00000008118	1.44504	-0.0032653	3.51734e-15	1.55115e-14
CDK11A	protein_coding	ENSG00000008128	-0.26035	-1.7634	0.477369	0.550126
NADK	protein_coding	ENSG00000008130	-0.0537044	5.18926	0.342462	0.413429
DLEC1	protein_coding	ENSG00000008226	-0.0704376	-3.57123	1	1
CYTH3	protein_coding	ENSG00000008256	-0.880589	6.70608	5.53204e-57	7.94021e-56
ADAM22	protein_coding	ENSG00000008277	-1.3656	-2.29304	0.00133615	0.00252542
SYPL1	protein_coding	ENSG00000008282	0.319497	6.19273	5.03289e-07	1.33484e-06
CYB561	protein_coding	ENSG00000008283	-0.0181737	3.0457	0.844707	0.883556
SPAG9	protein_coding	ENSG00000008294	0.564974	7.063	1.32889e-25	8.96772e-25
CELSR3	protein_coding	ENSG00000008300	-0.800604	1.72794	1.97301e-11	7.11882e-11
AASS	protein_coding	ENSG00000008311	-0.603658	4.56918	6.28748e-18	3.12778e-17
SS18L2	protein_coding	ENSG00000008324	0.44476	2.33205	2.64315e-05	6.03719e-05
MPND	protein_coding	ENSG00000008382	-0.460342	2.10732	4.61057e-06	1.131e-05
MGST1	protein_coding	ENSG00000008394	0.0736067	7.4704	0.196397	0.252805
CRY1	protein_coding	ENSG00000008405	0.2211	5.33793	0.000220105	0.000456514
NFIX	protein_coding	ENSG00000008441	-0.511921	7.22529	1.38142e-18	7.06122e-18
ST3GAL1	protein_coding	ENSG00000008513	1.52266	8.25282	3.38723e-162	1.55197e-160
MMP25	protein_coding	ENSG00000008516	4.0044	-0.752943	2.36057e-14	1.00169e-13
IL32	protein_coding	ENSG00000008517	0.535961	2.51325	3.44834e-08	1.00047e-07
PKD1	protein_coding	ENSG00000008710	-0.0792812	7.38367	0.24416	0.306744
MAPK8IP2	protein_coding	ENSG00000008735	-1.15817	-1.23659	7.58533e-05	0.000164968
MED24	protein_coding	ENSG00000008838	0.0526119	5.33575	0.389402	0.462625
RHOBTB2	protein_coding	ENSG00000008853	0.0261577	4.36668	0.696497	0.754033
HEATR5B	protein_coding	ENSG00000008869	-0.152502	4.18694	0.0142327	0.0231567
SEC62	protein_coding	ENSG00000008952	0.214524	8.0825	0.00234827	0.00429526
RPS20	protein_coding	ENSG00000008988	-0.0707082	8.29961	0.396459	0.469523
CSDE1	protein_coding	ENSG00000009307	0.0702649	9.50658	0.209845	0.26847
UBE3C	protein_coding	ENSG00000009335	0.642708	7.25842	7.10232e-30	5.50219e-29
REV3L	protein_coding	ENSG00000009413	-0.968188	5.34582	8.09399e-57	1.15703e-55
FAM76A	protein_coding	ENSG00000009780	-0.00448924	1.94577	0.981935	0.997813
POMT2	protein_coding	ENSG00000009830	0.266761	4.34992	1.36102e-05	3.19346e-05
VTA1	protein_coding	ENSG00000009844	0.340712	6.12087	1.03201e-08	3.105e-08
BAZ1B	protein_coding	ENSG00000009954	0.0342694	7.18531	0.524792	0.595365
RANBP9	protein_coding	ENSG00000010017	-0.184405	5.87189	0.00109056	0.0020856
ETV7	protein_coding	ENSG00000010030	-1.30218	-2.54071	0.0117795	0.0194396
SPRTN	protein_coding	ENSG00000010072	0.353851	4.01737	8.89272e-08	2.50068e-07
METTL13	protein_coding	ENSG00000010165	0.413884	4.65222	2.41367e-12	9.22183e-12
DYRK4	protein_coding	ENSG00000010219	-0.285676	2.69927	0.000774612	0.00150785
ZNF207	protein_coding	ENSG00000010244	0.484732	6.90293	2.53187e-18	1.28082e-17
UQCRC1	protein_coding	ENSG00000010256	0.208549	6.79242	9.37924e-05	0.000202113
STARD3NL	protein_coding	ENSG00000010270	0.269231	5.30879	1.55173e-05	3.62167e-05
CD9	protein_coding	ENSG00000010278	1.15966	6.98019	1.9184e-52	2.52542e-51
NCAPD2	protein_coding	ENSG00000010292	-0.797523	5.75061	7.64823e-45	8.56058e-44
IFFO1	protein_coding	ENSG00000010295	0.705462	4.76442	1.2227e-28	9.11987e-28
GIPR	protein_coding	ENSG00000010310	0.223242	-0.146558	0.319966	0.389739
PHF7	protein_coding	ENSG00000010318	-0.657579	0.643814	9.66617e-06	2.29587e-05
SEMA3G	protein_coding	ENSG00000010319	-0.894023	-3.35487	0.195072	0.251374
NISCH	protein_coding	ENSG00000010322	-0.537551	6.29016	2.65739e-17	1.291e-16
FUZ	protein_coding	ENSG00000010361	-0.781664	1.83818	1.12752e-11	4.1179e-11
IDS	protein_coding	ENSG00000010404	0.403815	6.23018	2.26193e-13	9.10993e-13
PRSS3	protein_coding	ENSG00000010438	3.44582	0.398087	7.98574e-91	1.8511e-89
ZNF200	protein_coding	ENSG00000010539	0.5996	3.06396	1.80541e-12	6.94601e-12
CD4	protein_coding	ENSG00000010610	-0.252703	5.69965	3.55971e-06	8.81681e-06
LRRC23	protein_coding	ENSG00000010626	-0.448228	1.83299	2.03786e-05	4.70646e-05
HFE	protein_coding	ENSG00000010704	-0.598407	3.66447	2.22376e-18	1.12754e-17
SCMH1	protein_coding	ENSG00000010803	-0.083009	4.82516	0.184362	0.238935
FYN	protein_coding	ENSG00000010810	-1.0105	4.59731	1.58871e-60	2.42011e-59
HIVEP2	protein_coding	ENSG00000010818	1.74375	6.50972	2.25534e-178	1.15316e-176
ELOA	protein_coding	ENSG00000011007	0.831584	6.7479	9.1672e-47	1.0752e-45
LYPLA2	protein_coding	ENSG00000011009	0.965339	5.46954	2.7879e-63	4.45054e-62
CLCN6	protein_coding	ENSG00000011021	-1.22374	4.72398	1.116e-69	1.94721e-68
MRC2	protein_coding	ENSG00000011028	-0.0683749	9.20734	0.210571	0.269262
TSPAN9	protein_coding	ENSG00000011105	-0.219752	6.07082	0.000100417	0.000215678
BTBD7	protein_coding	ENSG00000011114	0.128943	5.79348	0.0196903	0.0312465
APBA3	protein_coding	ENSG00000011132	0.107565	3.55896	0.176824	0.230266
MKS1	protein_coding	ENSG00000011143	-1.03623	2.06828	7.70362e-24	4.8475e-23
ABHD5	protein_coding	ENSG00000011198	2.32426	6.45215	0	0
ANOS1	protein_coding	ENSG00000011201	0.400276	-3.46891	0.481689	0.554164
AKAP8L	protein_coding	ENSG00000011243	-0.164842	5.47961	0.00223383	0.00410124
MBTD1	protein_coding	ENSG00000011258	-1.07859	3.11419	1.15659e-38	1.12658e-37
UTP18	protein_coding	ENSG00000011260	0.508771	4.91013	1.55822e-14	6.66191e-14
RNF216	protein_coding	ENSG00000011275	0.0928682	6.19816	0.082344	0.115972
TTC19	protein_coding	ENSG00000011295	-0.395206	4.26996	2.6415e-08	7.73507e-08
PTBP1	protein_coding	ENSG00000011304	0.543548	8.39405	8.75712e-26	5.95511e-25
DPF1	protein_coding	ENSG00000011332	0.387126	2.25769	0.000165582	0.000348203
SYT7	protein_coding	ENSG00000011347	1.64114	-0.742153	2.57984e-12	9.84178e-12
LARS2	protein_coding	ENSG00000011376	0.419664	4.95204	9.33704e-13	3.63909e-12
PIK3C2A	protein_coding	ENSG00000011405	-0.111825	6.2813	0.0459713	0.0682489
PLAUR	protein_coding	ENSG00000011422	2.71406	7.67173	0	0
ANLN	protein_coding	ENSG00000011426	-0.386138	6.95228	2.86458e-12	1.08903e-11
WIZ	protein_coding	ENSG00000011451	0.137578	6.37092	0.0269538	0.0417808
RABGAP1	protein_coding	ENSG00000011454	-0.833656	5.89028	3.67201e-53	4.91086e-52
DCN	protein_coding	ENSG00000011465	-0.327886	11.8381	3.12429e-08	9.09296e-08
QPCTL	protein_coding	ENSG00000011478	-0.61494	3.20756	8.35705e-11	2.90479e-10
PPP5C	protein_coding	ENSG00000011485	0.225794	5.77269	2.91134e-05	6.61975e-05
CEP68	protein_coding	ENSG00000011523	-0.987556	3.51862	4.75981e-42	4.99483e-41
MAP4K3	protein_coding	ENSG00000011566	-0.565922	6.27531	1.03749e-22	6.26329e-22
TMEM159	protein_coding	ENSG00000011638	-1.1443	4.11431	2.20618e-60	3.35203e-59
BRCA1	protein_coding	ENSG00000012048	-0.707262	3.28099	2.89113e-18	1.46005e-17
ERCC1	protein_coding	ENSG00000012061	1.0376	6.60784	1.17885e-76	2.26771e-75
SEMA3B	protein_coding	ENSG00000012171	-0.412531	6.60061	5.95287e-14	2.47079e-13
MBTPS2	protein_coding	ENSG00000012174	-0.157833	5.35989	0.00619946	0.0106837
PRICKLE3	protein_coding	ENSG00000012211	0.527359	2.91947	9.27533e-11	3.21069e-10
LTF	protein_coding	ENSG00000012223	0.0825191	-3.28304	1	1
EXTL3	protein_coding	ENSG00000012232	0.0416255	6.12141	0.440394	0.513827
ELOVL5	protein_coding	ENSG00000012660	0.261116	7.25648	0.000435532	0.000874734
CALCOCO1	protein_coding	ENSG00000012822	-0.845987	5.83164	5.38088e-54	7.30143e-53
UBR7	protein_coding	ENSG00000012963	0.606173	4.79386	1.53447e-21	8.88353e-21
MAP4K5	protein_coding	ENSG00000012983	-0.249091	7.09272	2.34222e-05	5.37628e-05
EHD3	protein_coding	ENSG00000013016	-0.163902	5.79743	0.00302109	0.00543962
PSMC4	protein_coding	ENSG00000013275	0.481091	6.26679	6.58065e-20	3.55536e-19
MAN2B2	protein_coding	ENSG00000013288	-0.154924	7.06216	0.00425726	0.00751206
SLC7A14	protein_coding	ENSG00000013293	-2.54042	3.70181	8.77934e-230	6.42604e-228
CLDN11	protein_coding	ENSG00000013297	-1.74098	6.36678	7.9867e-161	3.63107e-159
SLC25A39	protein_coding	ENSG00000013306	0.184153	5.64875	0.00123242	0.00234089
MVP	protein_coding	ENSG00000013364	-0.0163807	7.72992	0.753684	0.805789
NUB1	protein_coding	ENSG00000013374	-0.457901	5.80874	1.32359e-13	5.38722e-13
PGM3	protein_coding	ENSG00000013375	0.583711	7.14742	4.94645e-26	3.39647e-25
RWDD2A	protein_coding	ENSG00000013392	-0.506462	3.0523	4.44114e-10	1.47038e-09
CLK1	protein_coding	ENSG00000013441	-0.608304	5.49921	5.16679e-23	3.15917e-22
POLR3B	protein_coding	ENSG00000013503	-0.18167	4.27306	0.00335505	0.00600844
ANGEL1	protein_coding	ENSG00000013523	-0.373231	3.25625	4.3583e-07	1.16239e-06
RNF14	protein_coding	ENSG00000013561	0.188137	5.28004	0.00158047	0.00295835
DNASE1L1	protein_coding	ENSG00000013563	0.167855	4.62904	0.00615895	0.0106191
DDX11	protein_coding	ENSG00000013573	0.0788263	3.1	0.424894	0.498114
HEBP1	protein_coding	ENSG00000013583	-0.976533	5.79426	7.53607e-68	1.28565e-66
GPRC5A	protein_coding	ENSG00000013588	-0.694029	6.65635	2.92697e-37	2.74054e-36
MAMLD1	protein_coding	ENSG00000013619	-0.850873	5.46457	3.41851e-45	3.86307e-44
TACC3	protein_coding	ENSG00000013810	0.0398544	5.18378	0.522333	0.593086
UFL1	protein_coding	ENSG00000014123	-0.287912	5.26125	2.58478e-05	5.90997e-05
POLA2	protein_coding	ENSG00000014138	-0.054421	-0.0643773	0.816543	0.859519
ZC3H3	protein_coding	ENSG00000014164	0.368256	4.38079	2.14409e-06	5.40543e-06
CAPN1	protein_coding	ENSG00000014216	0.31429	7.09767	8.55966e-10	2.78019e-09
ACPP	protein_coding	ENSG00000014257	0.0857511	2.32389	0.372541	0.445202
MDH1	protein_coding	ENSG00000014641	-0.130255	5.60469	0.0210193	0.033224
SLC30A9	protein_coding	ENSG00000014824	0.0300631	6.45088	0.623111	0.687667
MTMR11	protein_coding	ENSG00000014914	-0.279147	2.47255	0.00688089	0.0117764
COX15	protein_coding	ENSG00000014919	-1.15986	3.11248	9.5558e-47	1.11854e-45
CCDC88C	protein_coding	ENSG00000015133	2.32004	-2.94453	5.26686e-06	1.28378e-05
YAF2	protein_coding	ENSG00000015153	0.418965	3.68508	9.0756e-10	2.94506e-09
ZMYND11	protein_coding	ENSG00000015171	0.0975189	6.92871	0.0984722	0.136132
WAS	protein_coding	ENSG00000015285	-0.727644	-2.90426	0.199684	0.256643
BID	protein_coding	ENSG00000015475	0.428464	5.4953	2.48997e-14	1.05559e-13
MATR3	protein_coding	ENSG00000015479	-0.426622	0.407399	0.0161532	0.026046
NPC1L1	protein_coding	ENSG00000015520	-0.896353	-1.72083	0.00467646	0.00820334
XYLT2	protein_coding	ENSG00000015532	-0.023073	5.8475	0.663033	0.723443
RGPD5	protein_coding	ENSG00000015568	0.904189	0.873867	2.56087e-10	8.59959e-10
NUDCD3	protein_coding	ENSG00000015676	0.283879	5.88936	8.31706e-08	2.34478e-07
GLT8D1	protein_coding	ENSG00000016864	-0.371545	5.63062	4.28049e-09	1.32703e-08
ATP2C1	protein_coding	ENSG00000017260	-0.0177836	6.77964	0.756076	0.807873
IGF1	protein_coding	ENSG00000017427	3.56044	-0.820261	3.79835e-36	3.45376e-35
SLC38A5	protein_coding	ENSG00000017483	1.1054	3.18439	3.97461e-45	4.48001e-44
RALBP1	protein_coding	ENSG00000017797	-0.435127	6.89437	2.86237e-15	1.26865e-14
RUFY3	protein_coding	ENSG00000018189	0.0243771	4.65175	0.697962	0.755247
CNTN1	protein_coding	ENSG00000018236	4.88061	-1.63384	8.19249e-37	7.58214e-36
WWTR1	protein_coding	ENSG00000018408	0.614123	7.29002	2.47862e-30	1.94065e-29
AGPS	protein_coding	ENSG00000018510	0.567863	5.9376	1.45498e-22	8.72987e-22
CXorf56	protein_coding	ENSG00000018610	0.161457	3.71517	0.0195541	0.0310417
ATP1A2	protein_coding	ENSG00000018625	-2.01383	4.42378	1.44606e-191	8.22857e-190
TTC27	protein_coding	ENSG00000018699	0.557952	4.12145	3.17182e-16	1.46814e-15
ZNF582	protein_coding	ENSG00000018869	0.450749	1.08948	0.000641689	0.0012622
PHLDB1	protein_coding	ENSG00000019144	0.777144	7.81564	5.13745e-51	6.567e-50
PRDM11	protein_coding	ENSG00000019485	-0.221595	2.61659	0.00957964	0.0160358
SNAI2	protein_coding	ENSG00000019549	-0.274394	5.70479	2.12013e-06	5.34885e-06
CD74	protein_coding	ENSG00000019582	0.130361	-1.50464	0.709651	0.765308
HGF	protein_coding	ENSG00000019991	-1.07508	8.70872	8.83976e-68	1.5066e-66
ZRANB1	protein_coding	ENSG00000019995	-1.45773	6.20312	8.41282e-145	3.3274e-143
NCDN	protein_coding	ENSG00000020129	0.0699494	5.41134	0.293837	0.361355
ADGRA2	protein_coding	ENSG00000020181	-0.541448	8.06048	1.56591e-24	1.01367e-23
ZFP64	protein_coding	ENSG00000020256	-0.252795	3.85672	0.000141009	0.000298571
MNAT1	protein_coding	ENSG00000020426	0.161353	4.61296	0.0315337	0.0483616
SAMD4A	protein_coding	ENSG00000020577	0.158045	7.72977	0.00224544	0.00412084
RUNX3	protein_coding	ENSG00000020633	1.4976	-0.166866	2.9978e-12	1.13747e-11
MRE11	protein_coding	ENSG00000020922	-0.497899	4.09378	1.06896e-13	4.36996e-13
PLEKHB1	protein_coding	ENSG00000021300	-0.539297	-1.57052	0.0768171	0.108883
SERPINB1	protein_coding	ENSG00000021355	-0.384388	4.60204	2.88189e-09	9.06338e-09
SPAST	protein_coding	ENSG00000021574	-0.287144	3.97697	6.92694e-05	0.000151354
NRXN3	protein_coding	ENSG00000021645	1.1567	2.29309	8.14425e-27	5.75579e-26
OSBPL5	protein_coding	ENSG00000021762	0.162153	5.30447	0.0038549	0.00684591
AQR	protein_coding	ENSG00000021776	0.129976	5.77532	0.0323108	0.0494459
CPS1	protein_coding	ENSG00000021826	-0.594645	2.6584	8.75866e-12	3.22283e-11
FHL1	protein_coding	ENSG00000022267	-0.836396	6.82287	1.18039e-52	1.55737e-51
RTF2	protein_coding	ENSG00000022277	-0.0778211	6.01743	0.221554	0.281471
SLC45A4	protein_coding	ENSG00000022567	0.376453	3.67496	4.8111e-08	1.37884e-07
RNF10	protein_coding	ENSG00000022840	-0.143757	7.1724	0.00650242	0.0111654
ZNF839	protein_coding	ENSG00000022976	-0.0329665	2.88692	0.680224	0.738934
ZDHHC6	protein_coding	ENSG00000023041	0.435004	4.98687	7.30295e-13	2.86276e-12
GRAMD1B	protein_coding	ENSG00000023171	1.95918	3.10871	4.77195e-92	1.12687e-90
RNH1	protein_coding	ENSG00000023191	-0.0417722	7.04145	0.430552	0.503744
NDUFS1	protein_coding	ENSG00000023228	-0.145109	6.25768	0.0116978	0.0193103
RB1CC1	protein_coding	ENSG00000023287	-0.76669	6.33361	1.24665e-29	9.58212e-29
ERP44	protein_coding	ENSG00000023318	0.012516	6.63979	0.824569	0.866416
ALAS1	protein_coding	ENSG00000023330	-0.491999	5.58951	2.07462e-19	1.0957e-18
BIRC3	protein_coding	ENSG00000023445	2.22557	5.09198	1.91726e-223	1.34208e-221
AKAP11	protein_coding	ENSG00000023516	0.0772947	6.09298	0.158976	0.209451
GLRX2	protein_coding	ENSG00000023572	-0.0990253	3.75403	0.210448	0.269124
SNAPC1	protein_coding	ENSG00000023608	0.294521	3.9669	0.000667786	0.00131075
DERA	protein_coding	ENSG00000023697	-0.611409	4.34964	6.9173e-23	4.20908e-22
STRAP	protein_coding	ENSG00000023734	0.484872	7.5978	1.62731e-13	6.58994e-13
ABCC2	protein_coding	ENSG00000023839	1.03238	-0.580661	1.08967e-06	2.81185e-06
DEF6	protein_coding	ENSG00000023892	-0.435113	-0.444387	0.0673177	0.0966377
PLEKHO1	protein_coding	ENSG00000023902	0.806628	6.54471	1.51295e-48	1.83552e-47
GCLM	protein_coding	ENSG00000023909	-0.0839892	6.51711	0.1764	0.229764
UBR2	protein_coding	ENSG00000024048	-0.248347	5.22484	2.12979e-05	4.9104e-05
EHD2	protein_coding	ENSG00000024422	-0.411094	9.00813	3.26239e-11	1.16025e-10
DEPDC1	protein_coding	ENSG00000024526	0.168408	4.49453	0.00677537	0.0116093
CCDC28A	protein_coding	ENSG00000024862	-1.08965	2.17302	1.39741e-24	9.05927e-24
HSF2	protein_coding	ENSG00000025156	-1.05723	3.1528	3.07734e-41	3.1801e-40
PHF20	protein_coding	ENSG00000025293	-0.0770848	5.45133	0.168026	0.219814
HSD17B6	protein_coding	ENSG00000025423	-0.090875	2.66806	0.364188	0.436579
NR1H3	protein_coding	ENSG00000025434	-1.21568	2.41733	1.48773e-32	1.23732e-31
TYMP	protein_coding	ENSG00000025708	0.671652	1.07647	7.76637e-06	1.86418e-05
NCAPH2	protein_coding	ENSG00000025770	0.32272	4.16476	6.50491e-07	1.71162e-06
TOMM34	protein_coding	ENSG00000025772	1.41304	5.27114	4.25225e-123	1.35382e-121
SEC63	protein_coding	ENSG00000025796	-0.00498683	7.69457	0.928884	0.951374
KPNA6	protein_coding	ENSG00000025800	-0.00882943	6.34316	0.869384	0.904028
VIM	protein_coding	ENSG00000026025	0.36537	12.1732	4.5561e-12	1.70673e-11
RTEL1-TNFRSF6B	protein_coding	ENSG00000026036	0.884923	-0.886916	0.00112287	0.00214389
FAS	protein_coding	ENSG00000026103	0.240133	5.59344	5.21216e-05	0.000115433
RNASET2	protein_coding	ENSG00000026297	-0.372318	1.82636	0.000714902	0.00139671
CD44	protein_coding	ENSG00000026508	-0.299359	11.69	1.30585e-07	3.62473e-07
KCNG1	protein_coding	ENSG00000026559	4.21903	6.81391	0	0
AGPAT4	protein_coding	ENSG00000026652	0.199535	3.38484	0.00572238	0.00991677
BTN3A1	protein_coding	ENSG00000026950	-1.32954	3.81592	3.05831e-71	5.45486e-70
MIPEP	protein_coding	ENSG00000027001	-0.657629	3.55381	8.9067e-16	4.05351e-15
PRKCH	protein_coding	ENSG00000027075	1.24201	-0.755826	4.20379e-07	1.12271e-06
IFNGR1	protein_coding	ENSG00000027697	0.312998	5.14252	9.07399e-08	2.54921e-07
B4GALT7	protein_coding	ENSG00000027847	-0.0164752	4.49581	0.788858	0.836171
SH2D2A	protein_coding	ENSG00000027869	4.15263	-2.63591	1.25093e-15	5.63927e-15
VRK2	protein_coding	ENSG00000028116	0.389624	4.07275	1.78467e-09	5.69597e-09
TNFRSF1B	protein_coding	ENSG00000028137	1.10628	3.80785	2.90966e-62	4.58271e-61
VEZT	protein_coding	ENSG00000028203	0.269645	6.0867	1.60422e-06	4.08171e-06
POU2F2	protein_coding	ENSG00000028277	2.01332	4.47593	4.63258e-166	2.17337e-164
BRD9	protein_coding	ENSG00000028310	0.701449	5.40253	4.39662e-36	3.98542e-35
SNX1	protein_coding	ENSG00000028528	-0.27405	6.41484	1.94522e-07	5.33234e-07
TBPL1	protein_coding	ENSG00000028839	0.108743	4.1523	0.149264	0.197808
ARNTL2	protein_coding	ENSG00000029153	1.5932	6.43582	1.88328e-161	8.60647e-160
BCLAF1	protein_coding	ENSG00000029363	-0.194901	7.44659	0.00107693	0.00206064
SLC39A9	protein_coding	ENSG00000029364	-0.00487486	6.1561	0.929236	0.951569
ANK1	protein_coding	ENSG00000029534	-1.42337	2.26272	1.40906e-41	1.46642e-40
TFB1M	protein_coding	ENSG00000029639	-0.493111	2.47332	5.82542e-08	1.66145e-07
RABEP1	protein_coding	ENSG00000029725	0.488313	6.61792	2.24135e-18	1.13613e-17
HMGB3	protein_coding	ENSG00000029993	-0.21552	4.74149	0.00100049	0.00192425
NUP160	protein_coding	ENSG00000030066	0.150659	5.31055	0.00895849	0.015066
BAK1	protein_coding	ENSG00000030110	1.18319	4.81788	6.88249e-88	1.54856e-86
MUSK	protein_coding	ENSG00000030304	-1.53344	0.143253	7.1406e-18	3.54219e-17
IKZF2	protein_coding	ENSG00000030419	0.899302	3.49662	2.01322e-30	1.57907e-29
GRN	protein_coding	ENSG00000030582	-0.149172	7.61931	0.00796668	0.013501
FAM13B	protein_coding	ENSG00000031003	0.331803	5.97806	1.72589e-09	5.51333e-09
ARHGAP31	protein_coding	ENSG00000031081	1.48119	6.31435	3.36845e-158	1.51195e-156
CENPQ	protein_coding	ENSG00000031691	-0.0971746	2.15872	0.373876	0.446494
SARS	protein_coding	ENSG00000031698	-0.445197	7.94771	3.1023e-15	1.37361e-14
RANBP3	protein_coding	ENSG00000031823	-0.495018	5.9945	5.02772e-18	2.51101e-17
ARID4A	protein_coding	ENSG00000032219	-1.09638	4.45292	1.64101e-51	2.12536e-50
EIPR1	protein_coding	ENSG00000032389	-0.114243	3.71165	0.117797	0.160224
PNPLA6	protein_coding	ENSG00000032444	-0.220729	5.7278	8.55281e-05	0.000185118
IFT88	protein_coding	ENSG00000032742	-0.090166	3.47241	0.22384	0.283924
ALG1	protein_coding	ENSG00000033011	0.0305786	4.60485	0.64608	0.707835
ZCCHC8	protein_coding	ENSG00000033030	0.286979	4.44165	1.93239e-06	4.89198e-06
ABCF2	protein_coding	ENSG00000033050	0.485811	3.66485	3.29165e-10	1.09971e-09
CHPF2	protein_coding	ENSG00000033100	0.171378	7.47749	0.00134843	0.0025459
FUT8	protein_coding	ENSG00000033170	0.629723	4.7471	6.27716e-25	4.12706e-24
UBA6	protein_coding	ENSG00000033178	0.357085	5.94962	4.29627e-10	1.42429e-09
GAB2	protein_coding	ENSG00000033327	-0.126835	4.36183	0.048391	0.0715367
ATP6V0A1	protein_coding	ENSG00000033627	0.397184	4.96449	4.92527e-08	1.41042e-07
PIAS1	protein_coding	ENSG00000033800	-0.139658	5.14186	0.0218697	0.0344571
SLC4A7	protein_coding	ENSG00000033867	1.32694	6.87681	2.34472e-122	7.3465e-121
APBA2	protein_coding	ENSG00000034053	0.537251	5.75554	1.45157e-21	8.4146e-21
MAP2K3	protein_coding	ENSG00000034152	1.50414	7.48228	3.18472e-179	1.64746e-177
TMSB10	protein_coding	ENSG00000034510	-0.00181063	10.2281	0.978742	0.994986
ASTE1	protein_coding	ENSG00000034533	0.377299	2.40304	1.74674e-05	4.05802e-05
RNF19A	protein_coding	ENSG00000034677	0.444539	5.69712	1.02719e-12	3.99639e-12
PEX3	protein_coding	ENSG00000034693	-0.138577	3.56155	0.0849981	0.119329
GABARAPL2	protein_coding	ENSG00000034713	-0.202718	5.22632	0.00680933	0.0116641
SH3YL1	protein_coding	ENSG00000035115	-0.673576	3.9671	1.29589e-21	7.52453e-21
FAM136A	protein_coding	ENSG00000035141	0.40026	4.88478	1.11343e-09	3.5913e-09
VCL	protein_coding	ENSG00000035403	0.219257	9.82902	3.43359e-05	7.74633e-05
DEPDC1B	protein_coding	ENSG00000035499	-0.340154	1.69932	0.00613209	0.0105779
DAPK2	protein_coding	ENSG00000035664	0.698194	1.30467	2.68413e-08	7.85728e-08
NSMAF	protein_coding	ENSG00000035681	-0.12919	5.63897	0.019114	0.0304059
ADSS	protein_coding	ENSG00000035687	-0.237054	5.60056	0.000351836	0.000715434
TIMP2	protein_coding	ENSG00000035862	0.0373496	9.88636	0.531657	0.601876
RFC1	protein_coding	ENSG00000035928	-0.141566	5.44511	0.0182266	0.0291045
TBC1D23	protein_coding	ENSG00000036054	0.119843	5.93582	0.0444561	0.0661769
CUL3	protein_coding	ENSG00000036257	-0.0667531	6.75494	0.249116	0.312258
MYOM2	protein_coding	ENSG00000036448	-0.667043	-3.2841	0.313287	0.382527
CYP46A1	protein_coding	ENSG00000036530	-0.168525	-0.315676	0.406281	0.479449
AC118549.1	protein_coding	ENSG00000036549	-0.0164631	5.90004	0.77515	0.824757
USP2	protein_coding	ENSG00000036672	1.80752	0.865455	6.92461e-36	6.24489e-35
TUBG2	protein_coding	ENSG00000037042	-0.607016	3.14476	1.26662e-10	4.34185e-10
RPL26L1	protein_coding	ENSG00000037241	0.967258	4.60819	8.76855e-41	8.95641e-40
FLT4	protein_coding	ENSG00000037280	0.272	-1.67584	0.423086	0.496259
NSUN2	protein_coding	ENSG00000037474	1.12775	6.80049	2.15862e-98	5.4165e-97
FBXO42	protein_coding	ENSG00000037637	0.0933633	4.51176	0.128194	0.172938
MFAP3	protein_coding	ENSG00000037749	0.520726	5.04835	6.02079e-14	2.49781e-13
MRI1	protein_coding	ENSG00000037757	0.00821013	4.00303	0.910217	0.936005
METTL1	protein_coding	ENSG00000037897	1.07244	3.43887	9.35949e-47	1.09702e-45
HOXC8	protein_coding	ENSG00000037965	-1.03422	-1.05399	8.71451e-05	0.000188503
AGA	protein_coding	ENSG00000038002	-0.124798	3.37274	0.135581	0.181888
PI4K2B	protein_coding	ENSG00000038210	0.130065	3.61097	0.100573	0.138798
BOD1L1	protein_coding	ENSG00000038219	-0.0528043	6.36216	0.350765	0.422269
MAT2B	protein_coding	ENSG00000038274	-0.359765	5.1934	1.18809e-09	3.82444e-09
EDC4	protein_coding	ENSG00000038358	0.380024	5.48376	2.49163e-09	7.86971e-09
TRIO	protein_coding	ENSG00000038382	-0.0982088	8.77534	0.0961408	0.133223
VCAN	protein_coding	ENSG00000038427	1.1069	7.33583	7.75923e-80	1.57325e-78
CLEC16A	protein_coding	ENSG00000038532	0.0490116	5.04053	0.39008	0.463243
MSR1	protein_coding	ENSG00000038945	0.0300101	-0.777593	0.956914	0.975551
MTREX	protein_coding	ENSG00000039123	0.259118	6.25878	1.9254e-05	4.45898e-05
DNAH5	protein_coding	ENSG00000039139	-1.16385	4.97607	1.17763e-79	2.3741e-78
ZFYVE16	protein_coding	ENSG00000039319	0.230695	5.75489	9.38677e-05	0.000202251
RIPOR1	protein_coding	ENSG00000039523	0.864041	6.92107	1.28021e-33	1.08886e-32
C6	protein_coding	ENSG00000039537	-1.09918	-0.855337	1.64346e-05	3.82615e-05
RAI14	protein_coding	ENSG00000039560	0.292496	9.24167	7.45744e-08	2.11087e-07
PNKP	protein_coding	ENSG00000039650	0.410413	4.40623	2.41133e-06	6.05493e-06
PHLPP2	protein_coding	ENSG00000040199	1.0581	5.42162	9.65764e-76	1.83776e-74
SPDL1	protein_coding	ENSG00000040275	3.35828	6.37178	0	0
STAU2	protein_coding	ENSG00000040341	-0.626782	4.60295	2.09467e-24	1.34952e-23
PQLC2	protein_coding	ENSG00000040487	0.156726	3.6092	0.0199904	0.0316942
CTNS	protein_coding	ENSG00000040531	0.311516	3.56956	1.31797e-05	3.09779e-05
RTN4R	protein_coding	ENSG00000040608	-0.0735234	-1.60085	0.892187	0.921817
PHF23	protein_coding	ENSG00000040633	0.386983	6.05637	8.97356e-13	3.49975e-12
INPP4A	protein_coding	ENSG00000040933	-0.117014	4.62285	0.0452527	0.067267
RAB27B	protein_coding	ENSG00000041353	1.01875	0.588114	7.87706e-09	2.39406e-08
PSMA4	protein_coding	ENSG00000041357	-0.0449927	6.53335	0.485613	0.557588
MYO16	protein_coding	ENSG00000041515	1.88207	-3.21569	0.000800353	0.00155538
LSG1	protein_coding	ENSG00000041802	0.696447	5.56232	4.40947e-35	3.88526e-34
PARP3	protein_coding	ENSG00000041880	-0.287549	3.28612	0.000366447	0.000743258
TNC	protein_coding	ENSG00000041982	1.41791	10.5149	9.5204e-117	2.799e-115
THAP3	protein_coding	ENSG00000041988	0.00292151	3.34748	0.969576	0.986631
RIPOR3	protein_coding	ENSG00000042062	-0.845131	4.22447	1.0553e-29	8.13259e-29
TDP1	protein_coding	ENSG00000042088	0.402289	3.70889	2.76306e-08	8.07763e-08
AIFM2	protein_coding	ENSG00000042286	0.296139	5.04326	7.05305e-07	1.84923e-06
SPATA7	protein_coding	ENSG00000042317	-1.92702	3.56152	7.35928e-134	2.67665e-132
MED17	protein_coding	ENSG00000042429	0.178393	2.06308	0.0937299	0.130189
RETSAT	protein_coding	ENSG00000042445	-0.439631	5.28263	1.17159e-14	5.04314e-14
CAPG	protein_coding	ENSG00000042493	-0.158552	4.62438	0.00865906	0.0145973
AP2S1	protein_coding	ENSG00000042753	0.235246	5.39625	0.000556921	0.0011052
USH2A	protein_coding	ENSG00000042781	1.78145	-3.33659	0.0114347	0.01889
TG	protein_coding	ENSG00000042832	-0.211747	-2.67056	0.788348	0.835875
DCUN1D1	protein_coding	ENSG00000043093	-0.17888	5.17933	0.00684977	0.0117265
JADE2	protein_coding	ENSG00000043143	-0.916068	5.11194	2.94626e-57	4.24608e-56
TRIT1	protein_coding	ENSG00000043514	0.333624	3.21771	5.71536e-05	0.000126071
CUL7	protein_coding	ENSG00000044090	-1.03103	5.32513	6.04698e-67	1.01396e-65
CTNNA1	protein_coding	ENSG00000044115	0.287448	8.84437	3.89876e-08	1.12652e-07
PHKA2	protein_coding	ENSG00000044446	0.718432	3.77577	2.12125e-26	1.47551e-25
CNTLN	protein_coding	ENSG00000044459	-0.763232	3.63997	1.05586e-23	6.60945e-23
HSPA5	protein_coding	ENSG00000044574	-0.368785	10.3493	8.75251e-11	3.03448e-10
DSG2	protein_coding	ENSG00000046604	0.243369	0.461903	0.176121	0.229469
GEMIN8	protein_coding	ENSG00000046647	-0.730868	2.9256	9.36355e-20	5.02198e-19
OFD1	protein_coding	ENSG00000046651	0.10265	4.25132	0.139023	0.185941
GPM6B	protein_coding	ENSG00000046653	1.53996	-1.6577	1.36339e-06	3.48957e-06
WDR37	protein_coding	ENSG00000047056	0.346461	4.90394	9.7416e-10	3.15306e-09
YTHDC2	protein_coding	ENSG00000047188	-0.699345	5.16077	3.86673e-29	2.93752e-28
CTPS2	protein_coding	ENSG00000047230	-0.572833	4.07084	6.76647e-19	3.50957e-18
ATP6V1H	protein_coding	ENSG00000047249	0.00870887	4.76213	0.888794	0.919302
POLR2B	protein_coding	ENSG00000047315	0.0536835	6.96963	0.35519	0.42707
FAM214A	protein_coding	ENSG00000047346	-1.59576	3.22206	9.06521e-90	2.0876e-88
ARAP2	protein_coding	ENSG00000047365	4.13096	-3.98524	0.128572	0.173422
TPR	protein_coding	ENSG00000047410	0.140814	7.32569	0.0113434	0.0187533
KIAA0556	protein_coding	ENSG00000047578	-0.0212469	4.74956	0.711458	0.766747
DTNBP1	protein_coding	ENSG00000047579	-0.418602	2.7649	1.27714e-06	3.27595e-06
XK	protein_coding	ENSG00000047597	0.367346	-2.29195	0.456411	0.5302
C12orf4	protein_coding	ENSG00000047621	0.313418	4.55573	3.39188e-07	9.1292e-07
SCML1	protein_coding	ENSG00000047634	-0.0191295	4.81883	0.768449	0.818812
WWC3	protein_coding	ENSG00000047644	0.472851	6.39887	1.1237e-18	5.76056e-18
ARHGAP6	protein_coding	ENSG00000047648	-1.83303	1.81243	3.36309e-46	3.89271e-45
FAM184B	protein_coding	ENSG00000047662	1.39264	-1.19378	1.71268e-06	4.34826e-06
MAP4	protein_coding	ENSG00000047849	-0.0956939	9.59868	0.0838907	0.117947
GOPC	protein_coding	ENSG00000047932	0.284887	5.76717	6.52476e-06	1.57732e-05
USP28	protein_coding	ENSG00000048028	-0.867189	4.05225	5.62487e-38	5.36049e-37
HDAC9	protein_coding	ENSG00000048052	0.442036	1.7114	0.000155666	0.000328188
TSPAN17	protein_coding	ENSG00000048140	-0.129383	5.62773	0.0337412	0.0514475
NOP16	protein_coding	ENSG00000048162	1.46341	4.99911	3.56597e-120	1.08268e-118
CC2D2A	protein_coding	ENSG00000048342	-1.06256	4.21767	8.64272e-56	1.21287e-54
RRM2B	protein_coding	ENSG00000048392	-0.234753	6.10518	0.000140081	0.000296642
ZNF800	protein_coding	ENSG00000048405	0.883516	5.09982	3.516e-51	4.51729e-50
SNX29	protein_coding	ENSG00000048471	-1.02234	5.25403	2.04719e-70	3.62211e-69
MRPS10	protein_coding	ENSG00000048544	0.0758552	5.53846	0.199004	0.255825
RSF1	protein_coding	ENSG00000048649	0.00692649	6.21005	0.908675	0.934964
VPS13D	protein_coding	ENSG00000048707	0.209009	5.64884	0.00162502	0.00303755
CELF2	protein_coding	ENSG00000048740	-0.682852	4.14943	1.36406e-23	8.51148e-23
FAM120A	protein_coding	ENSG00000048828	0.442613	7.77209	1.32964e-17	6.52066e-17
R3HDM1	protein_coding	ENSG00000048991	-0.214529	5.377	0.000397915	0.000802288
COL9A2	protein_coding	ENSG00000049089	-0.612203	0.519008	0.000240876	0.000497723
KITLG	protein_coding	ENSG00000049130	0.772639	6.81048	4.09695e-41	4.22139e-40
ERCC8	protein_coding	ENSG00000049167	-0.0112807	3.32422	0.897042	0.925935
ADAMTS6	protein_coding	ENSG00000049192	1.62191	4.30736	5.29178e-128	1.78484e-126
H6PD	protein_coding	ENSG00000049239	-0.393825	6.40138	4.0732e-13	1.61572e-12
VAMP3	protein_coding	ENSG00000049245	0.292849	7.12545	1.77155e-07	4.8737e-07
PER3	protein_coding	ENSG00000049246	-1.74453	2.58012	4.2377e-70	7.44551e-69
LTBP1	protein_coding	ENSG00000049323	-0.129901	10.2778	0.0134762	0.0219968
RCN1	protein_coding	ENSG00000049449	-0.396863	7.71203	1.16358e-12	4.51508e-12
ELN	protein_coding	ENSG00000049540	3.58161	5.3274	0	0
RFC2	protein_coding	ENSG00000049541	0.273995	3.78722	0.000456683	0.000915233
ARID1B	protein_coding	ENSG00000049618	-0.300572	5.67426	8.46081e-07	2.20423e-06
CLPTM1L	protein_coding	ENSG00000049656	0.160905	6.32775	0.00233125	0.00426634
NEDD4L	protein_coding	ENSG00000049759	-1.5729	4.19646	2.29627e-124	7.39163e-123
PPP1R3F	protein_coding	ENSG00000049769	0.00374293	2.72113	0.967473	0.984836
HEXB	protein_coding	ENSG00000049860	-0.0379843	7.36325	0.533324	0.603248
PTCD2	protein_coding	ENSG00000049883	-0.0948113	3.01801	0.294921	0.362562
JKAMP	protein_coding	ENSG00000050130	0.125208	5.88226	0.0212596	0.0335888
DKK3	protein_coding	ENSG00000050165	0.0241281	9.9125	0.655611	0.716586
ARHGEF5	protein_coding	ENSG00000050327	0.157048	-0.73993	0.515825	0.586777
NFE2L3	protein_coding	ENSG00000050344	-0.489974	5.94759	4.5012e-18	2.25188e-17
MCUR1	protein_coding	ENSG00000050393	0.102955	4.48852	0.0957113	0.13269
LIMA1	protein_coding	ENSG00000050405	0.849556	8.51413	2.31749e-51	2.99272e-50
LETMD1	protein_coding	ENSG00000050426	-0.64663	3.63939	1.73145e-19	9.16653e-19
SLC4A8	protein_coding	ENSG00000050438	1.29975	3.5343	2.42024e-72	4.36534e-71
LAMC3	protein_coding	ENSG00000050555	0.800018	-2.63615	0.0756177	0.107278
TNIP3	protein_coding	ENSG00000050730	1.68013	-1.13037	2.06292e-09	6.55791e-09
MAPK9	protein_coding	ENSG00000050748	0.487985	5.55309	8.79887e-19	4.53836e-18
BCAR1	protein_coding	ENSG00000050820	0.66768	7.58279	1.012e-26	7.13499e-26
FAM160A2	protein_coding	ENSG00000051009	0.159636	3.61129	0.0386752	0.0583154
HERPUD1	protein_coding	ENSG00000051108	-0.833751	6.07182	7.54791e-49	9.23336e-48
HOMER3	protein_coding	ENSG00000051128	0.593959	4.67584	1.04675e-17	5.16351e-17
POLQ	protein_coding	ENSG00000051341	-0.00985173	3.10442	0.910849	0.936491
PIK3CB	protein_coding	ENSG00000051382	-0.344383	4.48027	7.40769e-08	2.09712e-07
CYBA	protein_coding	ENSG00000051523	-0.33661	3.73951	4.51434e-05	0.000100623
THOC3	protein_coding	ENSG00000051596	-0.1712	4.1476	0.0285815	0.0441331
HEBP2	protein_coding	ENSG00000051620	-0.113976	5.2439	0.0438421	0.0653795
MPHOSPH9	protein_coding	ENSG00000051825	-0.499947	3.64918	2.72809e-12	1.03849e-11
PLEKHA5	protein_coding	ENSG00000052126	-0.411905	4.40848	1.01181e-08	3.04683e-08
SIKE1	protein_coding	ENSG00000052723	0.266069	5.15685	8.82827e-06	2.10447e-05
RRP12	protein_coding	ENSG00000052749	1.67635	5.64021	4.67259e-201	2.90227e-199
FNIP2	protein_coding	ENSG00000052795	0.976535	5.36739	1.33707e-65	2.20017e-64
MSMO1	protein_coding	ENSG00000052802	-1.68498	7.297	4.93337e-186	2.73662e-184
TTC17	protein_coding	ENSG00000052841	0.13224	6.87663	0.0123054	0.0202281
FSTL4	protein_coding	ENSG00000053108	2.0106	-1.36031	3.60461e-12	1.3607e-11
FOXN3	protein_coding	ENSG00000053254	-0.210478	6.88916	0.000139344	0.000295153
AKR7A2	protein_coding	ENSG00000053371	-0.402898	4.66405	2.18433e-10	7.37165e-10
MRTO4	protein_coding	ENSG00000053372	1.16447	5.86359	6.66416e-81	1.37011e-79
NNAT	protein_coding	ENSG00000053438	-0.515087	1.16812	2.01994e-05	4.6675e-05
USE1	protein_coding	ENSG00000053501	-0.444802	3.02562	2.25573e-08	6.63074e-08
NRIP2	protein_coding	ENSG00000053702	-2.93085	-3.35515	6.62278e-05	0.000145035
LAMA3	protein_coding	ENSG00000053747	-0.0470101	2.44582	0.663169	0.723501
AP5M1	protein_coding	ENSG00000053770	-0.00689689	4.69769	0.91142	0.936914
ANAPC4	protein_coding	ENSG00000053900	-0.103308	3.97987	0.155874	0.205718
TRAPPC3	protein_coding	ENSG00000054116	0.190991	5.59295	0.000795323	0.00154646
THRAP3	protein_coding	ENSG00000054118	-0.531671	7.27663	2.3704e-21	1.36246e-20
PHPT1	protein_coding	ENSG00000054148	-0.174224	5.46522	0.0082111	0.0138992
ARID4B	protein_coding	ENSG00000054267	-0.389533	5.70869	8.47152e-08	2.3868e-07
OPN3	protein_coding	ENSG00000054277	-1.34668	5.43419	2.39149e-104	6.32472e-103
SDCCAG8	protein_coding	ENSG00000054282	0.789841	4.53289	2.5223e-35	2.2336e-34
PTPRN	protein_coding	ENSG00000054356	0.17459	3.39298	0.022799	0.0357902
HHAT	protein_coding	ENSG00000054392	0.593854	3.17948	3.84315e-15	1.69229e-14
KIF1B	protein_coding	ENSG00000054523	0.21552	6.60797	8.80194e-05	0.0001903
FOXC1	protein_coding	ENSG00000054598	-1.10157	4.9628	1.3866e-71	2.47566e-70
TBC1D22A	protein_coding	ENSG00000054611	0.058933	4.74109	0.331599	0.40227
SYNE2	protein_coding	ENSG00000054654	-0.585805	3.5073	2.88514e-11	1.03149e-10
PLEKHH1	protein_coding	ENSG00000054690	-0.70576	-2.87769	0.112357	0.153522
ATP9A	protein_coding	ENSG00000054793	0.0946343	6.44352	0.0730767	0.104067
CHRDL2	protein_coding	ENSG00000054938	-0.553248	0.243078	0.00450826	0.00792641
FAM168A	protein_coding	ENSG00000054965	0.0715746	5.87385	0.181161	0.235166
RELT	protein_coding	ENSG00000054967	2.79526	3.86949	1.53065e-250	1.27362e-248
GALC	protein_coding	ENSG00000054983	-0.362464	4.97014	1.04341e-07	2.91438e-07
NOP58	protein_coding	ENSG00000055044	0.447929	6.2005	7.59164e-13	2.97328e-12
SZRD1	protein_coding	ENSG00000055070	0.534284	7.96329	3.56509e-21	2.03193e-20
KCNH2	protein_coding	ENSG00000055118	-1.1426	3.29598	6.58012e-47	7.74338e-46
CUL1	protein_coding	ENSG00000055130	-0.0530554	6.54478	0.389616	0.462848
FAM114A2	protein_coding	ENSG00000055147	-0.405802	4.55583	9.54854e-09	2.88122e-08
CYFIP2	protein_coding	ENSG00000055163	-0.559595	2.8952	1.4869e-10	5.07721e-10
TAB2	protein_coding	ENSG00000055208	0.088382	6.45916	0.0933474	0.129719
GINM1	protein_coding	ENSG00000055211	-0.259755	5.73999	8.12409e-05	0.000176359
EIF2AK2	protein_coding	ENSG00000055332	-0.78088	6.52147	1.52843e-32	1.27057e-31
USP36	protein_coding	ENSG00000055483	0.95925	6.01951	5.79968e-69	1.00202e-67
KMT2C	protein_coding	ENSG00000055609	0.174583	5.75321	0.0750387	0.106594
MCOLN3	protein_coding	ENSG00000055732	0.902565	-2.1583	0.0414105	0.0620893
PUM2	protein_coding	ENSG00000055917	-0.0588272	6.24968	0.269736	0.335128
MRPL43	protein_coding	ENSG00000055950	-0.0850976	4.97083	0.134187	0.180161
HPF1	protein_coding	ENSG00000056050	-0.707162	3.69553	1.05409e-20	5.9048e-20
ZFR	protein_coding	ENSG00000056097	0.25841	7.30318	1.18445e-06	3.04529e-06
ZNF280C	protein_coding	ENSG00000056277	0.169673	2.81271	0.0773352	0.109547
TRAF1	protein_coding	ENSG00000056558	0.457653	3.99812	7.66963e-08	2.16815e-07
RC3H2	protein_coding	ENSG00000056586	0.410488	6.4991	2.31034e-13	9.29191e-13
TRAF3IP2	protein_coding	ENSG00000056972	0.675266	3.31676	3.42105e-17	1.65426e-16
GYG2	protein_coding	ENSG00000056998	-0.993607	4.38794	8.12149e-58	1.18595e-56
DCBLD2	protein_coding	ENSG00000057019	1.46489	8.58981	2.68666e-170	1.30919e-168
SOAT1	protein_coding	ENSG00000057252	0.5572	6.05604	1.06149e-23	6.64229e-23
MSH4	protein_coding	ENSG00000057468	-1.03798	-3.35516	0.0752857	0.106867
F7	protein_coding	ENSG00000057593	0.0470328	-2.3553	1	1
GDI2	protein_coding	ENSG00000057608	0.343701	8.14156	1.37761e-10	4.71316e-10
PRDM1	protein_coding	ENSG00000057657	2.69187	4.20483	3.44881e-279	3.51659e-277
ATG5	protein_coding	ENSG00000057663	0.327847	4.5578	2.14858e-06	5.41443e-06
TMCC3	protein_coding	ENSG00000057704	4.92296	-0.58819	5.61339e-66	9.3064e-65
PITHD1	protein_coding	ENSG00000057757	0.536894	4.99711	5.87388e-18	2.92533e-17
MTA3	protein_coding	ENSG00000057935	-1.02203	4.24843	6.40794e-55	8.8103e-54
USP13	protein_coding	ENSG00000058056	0.604175	5.107	4.87387e-25	3.21402e-24
ATP11B	protein_coding	ENSG00000058063	0.151517	6.29136	0.00366695	0.00652987
LAMC2	protein_coding	ENSG00000058085	4.94894	3.81946	0	0
CDK14	protein_coding	ENSG00000058091	0.941363	5.22669	2.10746e-60	3.20479e-59
SEC61A1	protein_coding	ENSG00000058262	0.0292665	9.47736	0.574466	0.643034
PPP1R12A	protein_coding	ENSG00000058272	0.0624501	7.10985	0.239506	0.301541
RASGRF1	protein_coding	ENSG00000058335	-0.00244949	-0.226154	1	1
CAMK2B	protein_coding	ENSG00000058404	3.68826	0.0899886	4.46618e-46	5.14252e-45
CROCC	protein_coding	ENSG00000058453	-0.179728	3.73084	0.0212477	0.033573
POLR3E	protein_coding	ENSG00000058600	0.385019	4.77172	1.98603e-11	7.16432e-11
ATP2B4	protein_coding	ENSG00000058668	1.03964	8.81314	8.62529e-70	1.50793e-68
RIOK2	protein_coding	ENSG00000058729	0.299271	5.31835	1.21358e-05	2.86122e-05
YIPF1	protein_coding	ENSG00000058799	-0.190124	4.20494	0.00508994	0.00888009
NDC1	protein_coding	ENSG00000058804	-0.32849	4.81376	1.16852e-07	3.25173e-07
DGKG	protein_coding	ENSG00000058866	-0.0659156	-0.891719	0.810774	0.855028
FLYWCH1	protein_coding	ENSG00000059122	-0.198132	4.95615	0.000673284	0.00132037
UNKL	protein_coding	ENSG00000059145	-0.0544435	4.51388	0.417963	0.491361
TBXAS1	protein_coding	ENSG00000059377	-0.100354	4.03593	0.21033	0.268993
PARP12	protein_coding	ENSG00000059378	0.291773	3.4034	0.000239074	0.000494229
ALDH18A1	protein_coding	ENSG00000059573	0.0402713	6.89409	0.465674	0.538867
TARBP1	protein_coding	ENSG00000059588	-0.136657	3.32254	0.0810356	0.114248
GATB	protein_coding	ENSG00000059691	-0.390237	3.75695	7.3091e-08	2.06987e-07
MXD1	protein_coding	ENSG00000059728	-0.321499	3.36612	4.39103e-06	1.0794e-05
CDK17	protein_coding	ENSG00000059758	1.6968	6.75859	1.3267e-175	6.66752e-174
DNAJC25	protein_coding	ENSG00000059769	-0.0193641	3.86603	0.799453	0.845207
SLC2A3	protein_coding	ENSG00000059804	-0.1617	6.96292	0.00245062	0.00447088
PSD	protein_coding	ENSG00000059915	-0.299169	1.23508	0.0233076	0.0365331
CTDP1	protein_coding	ENSG00000060069	-0.098711	4.95409	0.125824	0.170131
YBX3	protein_coding	ENSG00000060138	0.252287	7.61587	3.31804e-06	8.24138e-06
STYK1	protein_coding	ENSG00000060140	2.18164	-0.31183	1.5384e-23	9.59254e-23
WNK1	protein_coding	ENSG00000060237	-0.190513	7.38537	0.011996	0.0197562
CCAR1	protein_coding	ENSG00000060339	-0.372703	6.69198	1.05531e-10	3.64013e-10
OGFR	protein_coding	ENSG00000060491	0.151691	5.82121	0.00598492	0.0103467
PIGV	protein_coding	ENSG00000060642	-0.69808	2.71827	6.4505e-16	2.95194e-15
PTPRU	protein_coding	ENSG00000060656	0.0548868	3.11187	0.475999	0.548799
SNRNP40	protein_coding	ENSG00000060688	-0.0795368	4.75461	0.208027	0.266434
COL11A1	protein_coding	ENSG00000060718	-0.802149	5.31505	2.21592e-36	2.03376e-35
QSER1	protein_coding	ENSG00000060749	0.47148	5.88733	2.77596e-13	1.1124e-12
MPC1	protein_coding	ENSG00000060762	-0.350959	3.04516	7.77185e-06	1.86524e-05
ACAA1	protein_coding	ENSG00000060971	-0.206832	4.79897	0.000729051	0.00142325
BCAT1	protein_coding	ENSG00000060982	-0.531723	8.1417	1.29681e-22	7.79941e-22
HDAC7	protein_coding	ENSG00000061273	0.633118	6.28398	5.81147e-18	2.89589e-17
LZTS1	protein_coding	ENSG00000061337	-0.695571	4.04357	2.43106e-24	1.56168e-23
PRDM6	protein_coding	ENSG00000061455	-1.91508	0.221139	4.37246e-20	2.3813e-19
SPAG4	protein_coding	ENSG00000061656	0.557407	-0.784646	0.0239656	0.0374648
NCKAP1	protein_coding	ENSG00000061676	0.287728	8.01489	8.10568e-08	2.28811e-07
MRPS35	protein_coding	ENSG00000061794	0.479715	5.27057	7.7954e-14	3.21437e-13
GUCY1B1	protein_coding	ENSG00000061918	-3.1792	2.20076	2.44795e-142	9.55349e-141
SFSWAP	protein_coding	ENSG00000061936	0.0814538	5.39138	0.154304	0.203828
TNK2	protein_coding	ENSG00000061938	0.10519	4.6315	0.139457	0.186394
MON2	protein_coding	ENSG00000061987	-0.0360979	6.02626	0.514538	0.585501
GPBP1	protein_coding	ENSG00000062194	-0.318367	5.54249	7.02071e-09	2.14006e-08
DGAT2	protein_coding	ENSG00000062282	0.317031	-0.822318	0.185324	0.240023
ZNF112	protein_coding	ENSG00000062370	-0.0784912	2.77691	0.506681	0.578016
CS	protein_coding	ENSG00000062485	0.520343	7.01496	2.90172e-20	1.59112e-19
LTK	protein_coding	ENSG00000062524	-0.0730615	0.642668	0.65422	0.715198
MRPS24	protein_coding	ENSG00000062582	-0.352204	0.374064	0.0838933	0.117947
ELMO2	protein_coding	ENSG00000062598	0.0133823	5.26503	0.83232	0.872793
WAPL	protein_coding	ENSG00000062650	0.318843	6.32878	1.23708e-08	3.69679e-08
VMP1	protein_coding	ENSG00000062716	0.378797	6.86703	5.0397e-11	1.76916e-10
APPBP2	protein_coding	ENSG00000062725	-0.415161	5.74399	4.5751e-14	1.90927e-13
POLD1	protein_coding	ENSG00000062822	-0.200575	3.43978	0.00681963	0.0116806
EIF4B	protein_coding	ENSG00000063046	-0.439677	8.52799	1.40376e-14	6.01756e-14
SLC6A16	protein_coding	ENSG00000063127	-1.20381	0.48191	4.7483e-11	1.67052e-10
BICRA	protein_coding	ENSG00000063169	-0.207828	4.01535	0.160042	0.210683
SPHK2	protein_coding	ENSG00000063176	-0.498485	3.7667	1.45281e-11	5.27425e-11
RPL18	protein_coding	ENSG00000063177	0.0569529	7.8196	0.291341	0.358711
CA11	protein_coding	ENSG00000063180	-0.739034	-0.0422013	0.000116983	0.000249797
ISOC2	protein_coding	ENSG00000063241	-0.141085	4.70366	0.0216614	0.0341564
U2AF2	protein_coding	ENSG00000063244	0.18202	7.52942	0.000621575	0.00122605
EPN1	protein_coding	ENSG00000063245	0.141403	7.33505	0.0214004	0.0337871
MED29	protein_coding	ENSG00000063322	-0.169307	5.33727	0.00362906	0.00646828
AHRR	protein_coding	ENSG00000063438	-0.989869	5.36524	1.0818e-61	1.68578e-60
ZNF275	protein_coding	ENSG00000063587	0.297998	5.14252	2.64456e-07	7.19132e-07
MTMR1	protein_coding	ENSG00000063601	0.00722448	5.68138	0.893686	0.92297
GPC1	protein_coding	ENSG00000063660	0.275018	8.89136	1.84541e-07	5.0674e-07
ADCK1	protein_coding	ENSG00000063761	-0.476298	1.44708	7.0839e-05	0.000154596
HAGH	protein_coding	ENSG00000063854	-0.269272	4.79317	6.21978e-06	1.50605e-05
RNF4	protein_coding	ENSG00000063978	0.530063	6.45362	8.25712e-23	5.01224e-22
CASP8	protein_coding	ENSG00000064012	-0.605113	3.69695	7.81935e-15	3.39069e-14
LIMCH1	protein_coding	ENSG00000064042	-0.450443	0.787553	0.00643769	0.0110608
INTS13	protein_coding	ENSG00000064102	0.221812	4.9828	0.000623405	0.00122939
TM7SF3	protein_coding	ENSG00000064115	-0.15947	5.56699	0.00445675	0.00784054
SPA17	protein_coding	ENSG00000064199	-0.262376	3.36786	0.00106859	0.00204628
WISP2	protein_coding	ENSG00000064205	-1.08812	-2.74052	0.0276689	0.0428291
ST3GAL6	protein_coding	ENSG00000064225	-0.325671	-2.35553	0.532673	0.602717
CDON	protein_coding	ENSG00000064309	-1.28064	-0.463771	5.70675e-09	1.75165e-08
TAF2	protein_coding	ENSG00000064313	0.540941	5.82974	4.55654e-22	2.67657e-21
HIPK2	protein_coding	ENSG00000064393	0.0556928	8.56402	0.371579	0.444203
TNPO3	protein_coding	ENSG00000064419	0.356181	6.13107	1.48378e-11	5.38558e-11
RFXANK	protein_coding	ENSG00000064490	0.057756	4.47659	0.339373	0.41029
TMEM161A	protein_coding	ENSG00000064545	-0.200204	3.82711	0.00364171	0.00648952
LPAR2	protein_coding	ENSG00000064547	0.45996	1.10124	0.0038899	0.00690459
CTSA	protein_coding	ENSG00000064601	-0.114052	7.02919	0.0402308	0.0604542
SUGP2	protein_coding	ENSG00000064607	-0.0100922	6.26575	0.864538	0.90012
SLC12A2	protein_coding	ENSG00000064651	0.496006	4.60248	2.23668e-16	1.04131e-15
SNX24	protein_coding	ENSG00000064652	0.49306	4.08958	1.21274e-13	4.94173e-13
EYA2	protein_coding	ENSG00000064655	0.0827373	-0.378624	0.776101	0.82542
CNN2	protein_coding	ENSG00000064666	0.090534	9.44243	0.131783	0.177265
ABCA7	protein_coding	ENSG00000064687	-0.0177369	1.89417	0.918557	0.942768
SNCAIP	protein_coding	ENSG00000064692	0.941307	2.69602	2.17268e-23	1.35046e-22
DDX20	protein_coding	ENSG00000064703	-0.145575	4.82207	0.0293534	0.0452459
BTBD1	protein_coding	ENSG00000064726	0.344105	6.91709	4.81734e-11	1.6938e-10
FAR2	protein_coding	ENSG00000064763	-0.169892	1.55618	0.166621	0.218268
SBNO2	protein_coding	ENSG00000064932	0.650682	6.37369	4.17423e-31	3.35002e-30
PMS1	protein_coding	ENSG00000064933	-1.07333	3.95639	2.06175e-50	2.60711e-49
HMG20B	protein_coding	ENSG00000064961	-0.0993658	5.71957	0.0673758	0.0967054
CALCRL	protein_coding	ENSG00000064989	-2.61506	-0.545422	2.49283e-22	1.48159e-21
TAF11	protein_coding	ENSG00000064995	0.273171	4.241	0.000100557	0.000215951
ANKS1A	protein_coding	ENSG00000064999	-0.0844116	4.23765	0.198774	0.255585
AP3D1	protein_coding	ENSG00000065000	0.343392	7.87677	2.50185e-11	8.97219e-11
ZNF76	protein_coding	ENSG00000065029	-0.530571	3.26	1.08739e-10	3.7464e-10
SLC9A3R2	protein_coding	ENSG00000065054	0.259636	6.29468	1.96671e-06	4.97601e-06
NTHL1	protein_coding	ENSG00000065057	-0.818934	2.78725	1.05832e-17	5.21913e-17
UHRF1BP1	protein_coding	ENSG00000065060	-1.78135	4.04682	2.63001e-132	9.33468e-131
GNAI3	protein_coding	ENSG00000065135	0.543112	6.95398	9.38759e-23	5.67891e-22
IPO5	protein_coding	ENSG00000065150	0.83721	7.77445	1.28671e-55	1.79712e-54
OAT	protein_coding	ENSG00000065154	0.0500235	6.63723	0.423971	0.497197
WDR3	protein_coding	ENSG00000065183	0.730179	5.89824	3.18196e-26	2.20117e-25
PKN2	protein_coding	ENSG00000065243	-0.33817	5.82114	3.78972e-09	1.17965e-08
WDR18	protein_coding	ENSG00000065268	0.225907	4.02633	0.00163241	0.00304974
TRAM2	protein_coding	ENSG00000065308	0.0335499	8.58641	0.546537	0.615954
NTN1	protein_coding	ENSG00000065320	0.37967	-0.546685	0.0533611	0.0781737
GLP2R	protein_coding	ENSG00000065325	-0.240326	-2.95783	0.680205	0.738934
MCM10	protein_coding	ENSG00000065328	0.0344303	3.26775	0.672987	0.732401
DGKA	protein_coding	ENSG00000065357	-0.183821	5.52084	0.000956599	0.0018442
ERBB3	protein_coding	ENSG00000065361	-2.06387	-1.2429	7.96779e-11	2.77168e-10
ANKRD44	protein_coding	ENSG00000065413	1.21502	3.22439	4.361e-60	6.58068e-59
KARS	protein_coding	ENSG00000065427	0.196578	6.86292	0.000255957	0.000527339
ADAT1	protein_coding	ENSG00000065457	-0.150656	3.82608	0.0259623	0.0403751
PDIA5	protein_coding	ENSG00000065485	0.0411579	4.8257	0.510091	0.58131
TBC1D22B	protein_coding	ENSG00000065491	-0.584854	3.54126	1.55697e-15	6.99566e-15
NDUFB4	protein_coding	ENSG00000065518	0.036458	5.67476	0.62367	0.688112
SPEN	protein_coding	ENSG00000065526	0.29315	6.3922	0.0221491	0.0348506
MYLK	protein_coding	ENSG00000065534	-0.618258	10.1135	6.84877e-32	5.61396e-31
ZC3H15	protein_coding	ENSG00000065548	0.358338	6.33613	2.69761e-08	7.89413e-08
MAP2K4	protein_coding	ENSG00000065559	0.350954	5.38609	2.05963e-09	6.54864e-09
TMEM206	protein_coding	ENSG00000065600	1.0765	3.74294	3.35369e-50	4.21963e-49
SLK	protein_coding	ENSG00000065613	0.430494	6.72104	2.57993e-13	1.03526e-12
CYB5R4	protein_coding	ENSG00000065615	0.560688	4.73438	1.13749e-19	6.07305e-19
COL17A1	protein_coding	ENSG00000065618	2.33128	-2.05833	7.20304e-10	2.34908e-09
GSTO2	protein_coding	ENSG00000065621	3.21709	1.70449	7.47236e-132	2.62575e-130
SEC61A2	protein_coding	ENSG00000065665	-0.478841	3.04181	2.02996e-09	6.45663e-09
TLE2	protein_coding	ENSG00000065717	0.0217857	-0.369959	0.930501	0.952403
ASB1	protein_coding	ENSG00000065802	0.666955	6.66624	7.93012e-34	6.79064e-33
FAM107B	protein_coding	ENSG00000065809	0.919697	7.14353	4.50082e-51	5.76157e-50
ME1	protein_coding	ENSG00000065833	0.217727	6.43268	5.22e-05	0.000115592
TBC1D1	protein_coding	ENSG00000065882	0.969434	5.74216	3.00595e-60	4.5476e-59
CDK13	protein_coding	ENSG00000065883	-0.153972	6.07876	0.00333251	0.00596989
MTHFD2	protein_coding	ENSG00000065911	-1.32952	7.12094	7.35119e-133	2.64643e-131
SLC9A7	protein_coding	ENSG00000065923	-0.489191	5.86138	1.39863e-17	6.85138e-17
FOXJ2	protein_coding	ENSG00000065970	-0.284209	5.30097	7.92791e-07	2.06999e-06
YBX1	protein_coding	ENSG00000065978	0.111855	9.70527	0.0447965	0.0666451
PDE4A	protein_coding	ENSG00000065989	0.228041	4.73743	0.0016249	0.00303755
PPP2R5A	protein_coding	ENSG00000066027	-0.290227	4.91048	9.16012e-06	2.1821e-05
ELAVL1	protein_coding	ENSG00000066044	0.258118	6.30165	2.20395e-06	5.54617e-06
TIE1	protein_coding	ENSG00000066056	2.55776	-1.45797	3.62968e-16	1.67679e-15
DIP2B	protein_coding	ENSG00000066084	0.863064	5.77645	3.90351e-54	5.30493e-53
SMARCD1	protein_coding	ENSG00000066117	0.128715	5.6889	0.0272742	0.042244
KDM4A	protein_coding	ENSG00000066135	-0.758377	4.29373	3.20735e-29	2.44185e-28
NFYC	protein_coding	ENSG00000066136	0.323429	4.18216	7.48925e-07	1.9601e-06
NGEF	protein_coding	ENSG00000066248	3.60524	-0.44517	6.63515e-46	7.58548e-45
ASPM	protein_coding	ENSG00000066279	0.104258	5.17325	0.0976083	0.135023
ELOVL1	protein_coding	ENSG00000066322	0.553932	6.65368	3.79969e-25	2.5113e-24
ZNRD1	protein_coding	ENSG00000066379	0.677036	2.28238	1.43341e-13	5.81941e-13
ZBTB11	protein_coding	ENSG00000066422	0.286409	5.04139	7.83332e-06	1.87974e-05
ATXN3	protein_coding	ENSG00000066427	-0.333177	3.2329	2.60682e-05	5.95653e-05
GOLGA5	protein_coding	ENSG00000066455	-0.0317607	6.06238	0.608115	0.674197
LRRC40	protein_coding	ENSG00000066557	-0.164665	4.40989	0.0213215	0.0336716
ISOC1	protein_coding	ENSG00000066583	-0.900054	4.21268	7.43268e-34	6.37396e-33
EML1	protein_coding	ENSG00000066629	-0.223083	5.86397	0.00021632	0.000449139
TRMT11	protein_coding	ENSG00000066651	-0.101256	3.38051	0.197301	0.253821
THUMPD1	protein_coding	ENSG00000066654	0.108414	5.44675	0.0788235	0.111485
MSANTD3	protein_coding	ENSG00000066697	0.629198	5.52133	3.6938e-23	2.27192e-22
ATG2B	protein_coding	ENSG00000066739	-0.47542	5.23053	6.52702e-15	2.84148e-14
ARFGEF1	protein_coding	ENSG00000066777	0.296177	6.22492	1.98347e-08	5.85581e-08
ZFAT	protein_coding	ENSG00000066827	-0.233996	3.02122	0.0025071	0.00456826
MTFR1	protein_coding	ENSG00000066855	-0.226747	4.2346	0.000387468	0.000782566
STAG3	protein_coding	ENSG00000066923	-0.311817	-2.58294	0.617828	0.682955
FECH	protein_coding	ENSG00000066926	-0.213492	4.4706	0.00148234	0.00278087
MYO9A	protein_coding	ENSG00000066933	0.139092	4.99242	0.0310905	0.0477161
PFKP	protein_coding	ENSG00000067057	0.568152	8.13181	9.38716e-22	5.465e-21
IDI1	protein_coding	ENSG00000067064	-1.58837	7.12917	6.452e-123	2.04333e-121
SP100	protein_coding	ENSG00000067066	0.407764	5.89769	2.21542e-12	8.46987e-12
KLF6	protein_coding	ENSG00000067082	0.888681	8.29343	5.21399e-64	8.39953e-63
PLPP1	protein_coding	ENSG00000067113	-0.730557	3.92778	1.79694e-26	1.25338e-25
NEO1	protein_coding	ENSG00000067141	-0.786142	7.84853	1.48228e-49	1.83619e-48
TRAM1	protein_coding	ENSG00000067167	-0.474616	9.73389	3.89404e-13	1.54639e-12
PHKA1	protein_coding	ENSG00000067177	1.18677	3.21169	3.77545e-49	4.64428e-48
TNFRSF1A	protein_coding	ENSG00000067182	0.124878	7.42412	0.0245607	0.0383374
CACNB1	protein_coding	ENSG00000067191	-0.290116	2.91959	0.000947354	0.00182717
EVI5	protein_coding	ENSG00000067208	0.109476	5.7436	0.0462884	0.0686965
STOML1	protein_coding	ENSG00000067221	-0.181475	3.60323	0.0110902	0.0183691
PKM	protein_coding	ENSG00000067225	0.151963	11.0297	0.00414902	0.00733206
DHX29	protein_coding	ENSG00000067248	0.330861	6.34898	3.54046e-08	1.02517e-07
DNTTIP2	protein_coding	ENSG00000067334	0.625955	6.02246	2.3156e-19	1.21968e-18
METTL22	protein_coding	ENSG00000067365	-0.18478	4.00607	0.00539416	0.00938392
TP53BP1	protein_coding	ENSG00000067369	-0.451422	6.45619	3.63967e-17	1.75756e-16
TRO	protein_coding	ENSG00000067445	-0.592826	4.73658	1.76698e-22	1.05695e-21
RRP15	protein_coding	ENSG00000067533	0.366012	5.22187	1.61965e-06	4.11799e-06
RHOA	protein_coding	ENSG00000067560	0.426148	9.13086	6.20972e-16	2.84518e-15
DHX8	protein_coding	ENSG00000067596	0.0505729	5.43134	0.366197	0.438631
PMS2P4	transcribed_unprocessed_pseudogene	ENSG00000067601	0.158488	-0.292955	0.442974	0.516564
PRKCZ	protein_coding	ENSG00000067606	-0.642198	-0.747143	0.00544763	0.00947134
IARS2	protein_coding	ENSG00000067704	-0.215223	6.45737	0.000344284	0.000700886
SYT1	protein_coding	ENSG00000067715	-0.333528	3.02977	6.42705e-05	0.000140994
NAV3	protein_coding	ENSG00000067798	1.6412	7.60352	1.43699e-178	7.39022e-177
IDH3G	protein_coding	ENSG00000067829	0.188837	5.26061	0.000709867	0.00138702
ROGDI	protein_coding	ENSG00000067836	-0.388741	0.939881	0.00828014	0.0140067
PDZD4	protein_coding	ENSG00000067840	0.637118	-1.19096	0.0234214	0.0366889
ATP2B3	protein_coding	ENSG00000067842	1.15815	-2.90154	0.0820049	0.115531
ROCK1	protein_coding	ENSG00000067900	0.409741	7.41965	8.83563e-13	3.449e-12
CBFB	protein_coding	ENSG00000067955	1.93917	6.79631	1.88554e-251	1.57634e-249
PDK3	protein_coding	ENSG00000067992	0.775244	-1.01814	0.000754153	0.00146997
HYAL2	protein_coding	ENSG00000068001	0.149091	4.27819	0.0179931	0.028776
HDAC4	protein_coding	ENSG00000068024	-0.338539	4.43127	5.73807e-07	1.51481e-06
RASSF1	protein_coding	ENSG00000068028	0.588372	4.86437	7.16415e-23	4.35628e-22
FGFR3	protein_coding	ENSG00000068078	1.87103	0.551646	3.39016e-27	2.42017e-26
IFI35	protein_coding	ENSG00000068079	-0.531718	2.93352	1.16838e-09	3.76237e-09
HEATR6	protein_coding	ENSG00000068097	-0.913319	4.12094	9.50661e-48	1.1377e-46
COASY	protein_coding	ENSG00000068120	0.112081	5.4258	0.0619335	0.0895424
PLEKHH3	protein_coding	ENSG00000068137	-0.221761	3.52477	0.00358465	0.00639301
MEF2A	protein_coding	ENSG00000068305	0.713779	6.68955	8.37555e-40	8.36607e-39
OTUD5	protein_coding	ENSG00000068308	0.148365	5.92799	0.00714109	0.0121933
TFE3	protein_coding	ENSG00000068323	-0.0869474	7.12702	0.120071	0.163027
TBC1D25	protein_coding	ENSG00000068354	0.225558	3.594	0.00208599	0.00384421
ACSL4	protein_coding	ENSG00000068366	0.686864	7.93752	1.42223e-29	1.09032e-28
INPP5A	protein_coding	ENSG00000068383	0.977412	4.93098	6.15061e-60	9.24163e-59
GPKOW	protein_coding	ENSG00000068394	-0.330903	4.2713	7.99369e-06	1.9164e-05
GRIPAP1	protein_coding	ENSG00000068400	-0.385138	5.03914	2.22752e-11	8.02235e-11
FTSJ1	protein_coding	ENSG00000068438	0.970128	5.48987	7.04173e-67	1.17852e-65
PRR11	protein_coding	ENSG00000068489	0.190558	4.96335	0.00169867	0.00316751
REEP1	protein_coding	ENSG00000068615	2.11784	-3.50801	0.00269682	0.00489474
ATP11A	protein_coding	ENSG00000068650	0.707251	6.34256	7.44491e-35	6.52077e-34
POLR1A	protein_coding	ENSG00000068654	0.511743	6.22206	9.03646e-20	4.84803e-19
LAPTM4A	protein_coding	ENSG00000068697	-0.33655	8.37347	3.93524e-09	1.22386e-08
TTC7A	protein_coding	ENSG00000068724	0.445783	4.78763	1.58639e-13	6.42719e-13
IP6K2	protein_coding	ENSG00000068745	-0.509639	5.4504	3.7351e-18	1.87552e-17
SRBD1	protein_coding	ENSG00000068784	-0.872917	3.53593	1.30536e-28	9.72815e-28
KIF2A	protein_coding	ENSG00000068796	0.211486	5.50696	0.000171958	0.000360726
RASGRP2	protein_coding	ENSG00000068831	0.521265	-0.983655	0.0796758	0.112546
PSME4	protein_coding	ENSG00000068878	0.611596	7.12016	2.359e-30	1.84864e-29
IFT80	protein_coding	ENSG00000068885	-0.678052	3.30623	7.88101e-20	4.24362e-19
SIRT2	protein_coding	ENSG00000068903	0.0173341	5.05803	0.787284	0.834934
ERLEC1	protein_coding	ENSG00000068912	-0.215796	6.76194	0.000263569	0.000542579
PPP2R5B	protein_coding	ENSG00000068971	0.141373	4.50335	0.0317816	0.0487037
PITX1	protein_coding	ENSG00000069011	-1.07624	5.53031	6.38864e-74	1.18006e-72
MAST4	protein_coding	ENSG00000069020	0.676	4.6792	3.34024e-21	1.90562e-20
NUP133	protein_coding	ENSG00000069248	-0.365052	5.10959	3.11991e-09	9.79796e-09
NUCKS1	protein_coding	ENSG00000069275	-0.590683	8.18178	6.97628e-22	4.08164e-21
VPS35	protein_coding	ENSG00000069329	-0.0890819	6.64542	0.119037	0.161711
DNAJA2	protein_coding	ENSG00000069345	0.54384	6.55001	1.04905e-18	5.38724e-18
BCL3	protein_coding	ENSG00000069399	-0.426616	4.43485	3.72455e-08	1.07777e-07
KCNAB2	protein_coding	ENSG00000069424	-1.02921	1.23094	1.43183e-13	5.81435e-13
ABCC9	protein_coding	ENSG00000069431	-0.348395	2.23778	0.000935441	0.00180558
GAL	protein_coding	ENSG00000069482	2.85701	2.75207	5.51246e-185	2.992e-183
CLEC2D	protein_coding	ENSG00000069493	-0.706797	0.741886	1.09864e-06	2.83417e-06
FUNDC1	protein_coding	ENSG00000069509	-0.174969	2.90324	0.0578208	0.084148
RORA	protein_coding	ENSG00000069667	-0.69408	2.57432	1.38784e-15	6.25008e-15
DRD4	protein_coding	ENSG00000069696	-0.431982	-2.75224	0.420385	0.493682
TGFBR3	protein_coding	ENSG00000069702	-1.74357	3.86596	2.74193e-118	8.18403e-117
ATP1B3	protein_coding	ENSG00000069849	0.63313	7.35252	2.59959e-23	1.60844e-22
NEDD4	protein_coding	ENSG00000069869	-0.314064	7.11684	2.54407e-08	7.45719e-08
PIGB	protein_coding	ENSG00000069943	-0.565976	3.02302	1.75887e-11	6.36309e-11
MAPK6	protein_coding	ENSG00000069956	0.263397	6.7247	1.46027e-05	3.41815e-05
GNB5	protein_coding	ENSG00000069966	-0.766303	4.53618	9.65484e-36	8.64964e-35
RAB27A	protein_coding	ENSG00000069974	-0.773153	4.10222	1.13207e-27	8.19436e-27
HDHD5	protein_coding	ENSG00000069998	-0.135402	3.48476	0.0807068	0.113848
UFD1	protein_coding	ENSG00000070010	0.284763	5.82848	2.59267e-07	7.05348e-07
LRP6	protein_coding	ENSG00000070018	-0.756657	6.4932	4.92572e-42	5.16586e-41
PHRF1	protein_coding	ENSG00000070047	0.519257	6.52334	4.49289e-22	2.64094e-21
ELP1	protein_coding	ENSG00000070061	-0.0457955	5.59066	0.415964	0.489221
NUCB2	protein_coding	ENSG00000070081	-0.0824929	7.11837	0.167202	0.218902
PFN2	protein_coding	ENSG00000070087	-0.179467	7.15479	0.00116244	0.00221609
PTPN3	protein_coding	ENSG00000070159	0.602299	-0.453927	0.00539316	0.00938311
SPTB	protein_coding	ENSG00000070182	0.573363	-2.52034	0.197254	0.253779
SLC44A1	protein_coding	ENSG00000070214	-0.297269	4.8736	5.39841e-06	1.31385e-05
TMEM260	protein_coding	ENSG00000070269	-0.345134	4.50002	5.76556e-09	1.76939e-08
SMG6	protein_coding	ENSG00000070366	0.535318	5.84742	7.68248e-21	4.33383e-20
EXOC5	protein_coding	ENSG00000070367	0.272088	6.78121	1.46821e-06	3.74754e-06
CLTCL1	protein_coding	ENSG00000070371	-0.998523	3.23204	1.92567e-35	1.7156e-34
FGF22	protein_coding	ENSG00000070388	-1.12345	-3.44908	0.0658509	0.0947094
FSTL3	protein_coding	ENSG00000070404	1.7851	7.42625	1.72003e-237	1.33076e-235
DGCR2	protein_coding	ENSG00000070413	-0.0887157	5.93459	0.1177	0.160111
RNF126	protein_coding	ENSG00000070423	0.823677	5.07084	2.28086e-43	2.46988e-42
MNT	protein_coding	ENSG00000070444	-1.33031	4.41395	6.53677e-70	1.14507e-68
ZXDC	protein_coding	ENSG00000070476	0.0342615	4.05433	0.610098	0.675589
JMJD6	protein_coding	ENSG00000070495	1.05849	5.78397	9.29099e-74	1.709e-72
POLB	protein_coding	ENSG00000070501	-0.326948	3.01208	0.00590635	0.0102175
WIPI1	protein_coding	ENSG00000070540	-0.325077	5.77902	4.40197e-09	1.36349e-08
GBA2	protein_coding	ENSG00000070610	0.665544	5.06281	1.60907e-28	1.19361e-27
NDST1	protein_coding	ENSG00000070614	-0.151663	8.12485	0.00483658	0.00846402
ASNS	protein_coding	ENSG00000070669	-2.50585	0.615412	3.45912e-46	3.99862e-45
AP3M2	protein_coding	ENSG00000070718	0.209846	4.47416	0.000760315	0.00148149
ST6GALNAC2	protein_coding	ENSG00000070731	0.229889	-2.1671	0.595553	0.662978
PABPC1	protein_coding	ENSG00000070756	-0.0397679	9.948	0.477589	0.550272
TESK2	protein_coding	ENSG00000070759	-1.07055	0.341006	1.24319e-10	4.26504e-10
CFAP20	protein_coding	ENSG00000070761	-0.0103012	4.58216	0.891993	0.921778
CSNK2A2	protein_coding	ENSG00000070770	0.488394	6.10573	4.32732e-18	2.16735e-17
PTPN21	protein_coding	ENSG00000070778	0.0792999	6.65385	0.13349	0.179301
EIF2B3	protein_coding	ENSG00000070785	0.162533	4.57345	0.0167049	0.026874
CAMK2A	protein_coding	ENSG00000070808	0.652618	-0.953817	0.0364847	0.0552675
TCOF1	protein_coding	ENSG00000070814	0.306125	6.04459	1.95264e-08	5.76866e-08
CDC42	protein_coding	ENSG00000070831	0.666134	-0.291073	0.00188006	0.00348364
OSBPL3	protein_coding	ENSG00000070882	-0.354156	5.53271	5.96703e-10	1.9583e-09
RAD18	protein_coding	ENSG00000070950	0.436384	3.99028	1.38224e-10	4.72809e-10
ATP2B1	protein_coding	ENSG00000070961	0.194668	7.17017	0.000424938	0.00085404
NCK2	protein_coding	ENSG00000071051	0.126176	5.23385	0.0342478	0.0521748
MAP4K4	protein_coding	ENSG00000071054	0.92638	8.81433	2.46998e-64	4.00096e-63
RPL31	protein_coding	ENSG00000071082	-0.00960845	7.16764	0.916002	0.940747
WDR1	protein_coding	ENSG00000071127	0.533499	10.0263	2.69459e-22	1.59881e-21
SNX13	protein_coding	ENSG00000071189	-0.266999	5.14717	1.52229e-05	3.55578e-05
ARHGAP10	protein_coding	ENSG00000071205	-0.204433	5.51663	0.000600066	0.00118615
RPS6KA2	protein_coding	ENSG00000071242	-0.843932	7.03431	1.15397e-50	1.46658e-49
ING3	protein_coding	ENSG00000071243	0.127048	3.05234	0.141052	0.188272
VASH1	protein_coding	ENSG00000071246	-0.4904	3.58548	6.78595e-10	2.21798e-09
LMCD1	protein_coding	ENSG00000071282	1.88063	5.97698	4.07301e-149	1.67869e-147
BUD23	protein_coding	ENSG00000071462	0.120683	5.68053	0.0418472	0.0626908
SEL1L	protein_coding	ENSG00000071537	-0.208952	7.68668	6.90803e-05	0.000150963
TRIP13	protein_coding	ENSG00000071539	0.307123	3.92481	1.55562e-05	3.62977e-05
ATP6AP1	protein_coding	ENSG00000071553	-0.119275	6.63736	0.0254785	0.0397068
TCF3	protein_coding	ENSG00000071564	0.340197	6.82104	8.59586e-11	2.98604e-10
TRIB2	protein_coding	ENSG00000071575	-0.367042	4.4085	9.04314e-08	2.54095e-07
DAZAP1	protein_coding	ENSG00000071626	0.394098	7.14492	1.06546e-13	4.35667e-13
MBD3	protein_coding	ENSG00000071655	0.0368914	5.18891	0.569187	0.637935
HLTF	protein_coding	ENSG00000071794	-0.687341	5.23836	5.48617e-27	3.89912e-26
FAM50A	protein_coding	ENSG00000071859	0.232688	6.3109	6.15141e-05	0.000135115
FAM3A	protein_coding	ENSG00000071889	-0.123788	4.72019	0.0479692	0.070988
CPSF1	protein_coding	ENSG00000071894	-0.235462	5.93077	6.02337e-05	0.000132501
CYBRD1	protein_coding	ENSG00000071967	-0.205189	7.71961	0.000220486	0.000457196
PDCD2	protein_coding	ENSG00000071994	0.312427	5.37514	1.39052e-07	3.85189e-07
SLC6A15	protein_coding	ENSG00000072041	-0.0872129	0.94288	0.607831	0.674151
RDH11	protein_coding	ENSG00000072042	-0.518187	6.18278	1.17513e-15	5.30295e-15
PRKACA	protein_coding	ENSG00000072062	0.287428	6.42102	3.17456e-06	7.89835e-06
ADGRL1	protein_coding	ENSG00000072071	-0.566204	1.13002	3.14856e-05	7.12698e-05
ACTN1	protein_coding	ENSG00000072110	0.50802	10.6603	4.55139e-21	2.58488e-20
ZFYVE26	protein_coding	ENSG00000072121	-0.291679	4.16229	1.45361e-05	3.40392e-05
RPS6KA6	protein_coding	ENSG00000072133	1.11078	3.925	1.96785e-49	2.42918e-48
EPN2	protein_coding	ENSG00000072134	0.248499	6.12667	3.51394e-06	8.7071e-06
PTPN18	protein_coding	ENSG00000072135	0.209514	3.79754	0.00786042	0.0133427
LIMS2	protein_coding	ENSG00000072163	-0.300747	5.51155	0.000432045	0.000868027
SPEG	protein_coding	ENSG00000072195	-1.08749	5.74402	1.89873e-49	2.34714e-48
LNX1	protein_coding	ENSG00000072201	-1.41986	-0.394578	6.43231e-11	2.2473e-10
ALDH3A2	protein_coding	ENSG00000072210	-1.68168	2.04415	1.42126e-47	1.69284e-46
TFRC	protein_coding	ENSG00000072274	0.0986356	8.18807	0.0830392	0.116867
SREBF1	protein_coding	ENSG00000072310	-1.09418	5.25491	6.53227e-48	7.82807e-47
TRPC5	protein_coding	ENSG00000072315	-1.12782	-0.486209	4.50998e-07	1.20048e-06
AFF4	protein_coding	ENSG00000072364	0.261308	7.83528	5.10787e-06	1.24606e-05
UBE2D1	protein_coding	ENSG00000072401	-0.140937	4.40339	0.0267451	0.0415157
MPP5	protein_coding	ENSG00000072415	-0.512761	6.12115	1.93197e-17	9.42998e-17
RHOBTB1	protein_coding	ENSG00000072422	-2.33999	5.08191	4.17052e-283	4.40527e-281
SMC1A	protein_coding	ENSG00000072501	0.0777502	6.99718	0.14121	0.188422
HSD17B10	protein_coding	ENSG00000072506	0.310176	5.00244	6.79795e-07	1.78499e-06
MARK2	protein_coding	ENSG00000072518	0.397058	5.27093	2.50001e-11	8.96891e-11
HMMR	protein_coding	ENSG00000072571	-0.352496	3.92535	5.80396e-07	1.53198e-06
CHFR	protein_coding	ENSG00000072609	0.680665	4.98344	4.83653e-33	4.05496e-32
TRHDE	protein_coding	ENSG00000072657	-0.114221	7.67296	0.0364093	0.0551627
P4HA2	protein_coding	ENSG00000072682	0.596456	7.16029	3.59391e-28	2.64593e-27
NFATC3	protein_coding	ENSG00000072736	-0.0572576	4.02268	0.363017	0.435294
TRNT1	protein_coding	ENSG00000072756	0.498289	4.51058	4.69348e-11	1.65222e-10
ACADVL	protein_coding	ENSG00000072778	0.604313	7.28151	8.84978e-21	4.98118e-20
STK10	protein_coding	ENSG00000072786	0.741913	6.15627	1.14377e-44	1.27455e-43
FBXW11	protein_coding	ENSG00000072803	-0.127865	6.40491	0.0253689	0.0395499
ACAP1	protein_coding	ENSG00000072818	0.525713	-1.795	0.185104	0.239791
CRMP1	protein_coding	ENSG00000072832	1.12726	-1.61259	0.000267024	0.000549306
EVC	protein_coding	ENSG00000072840	-0.0741679	6.18502	0.169654	0.221762
DERL2	protein_coding	ENSG00000072849	0.21237	5.3157	0.000191843	0.000400345
NDE1	protein_coding	ENSG00000072864	-0.592055	4.65517	2.1856e-23	1.35754e-22
MRVI1	protein_coding	ENSG00000072952	-1.86282	6.12044	4.23827e-245	3.39832e-243
TMEM38A	protein_coding	ENSG00000072954	-0.479993	0.165912	0.00536693	0.00934393
AP1M1	protein_coding	ENSG00000072958	0.183373	6.10189	0.000604359	0.00119423
PVR	protein_coding	ENSG00000073008	0.616161	8.72703	3.8536e-32	3.178e-31
XRCC1	protein_coding	ENSG00000073050	0.163622	4.10926	0.0251864	0.0392827
SCARB1	protein_coding	ENSG00000073060	-0.176364	4.94162	0.00266531	0.00484054
MCM2	protein_coding	ENSG00000073111	-0.549356	4.41958	1.08049e-15	4.88841e-15
MOV10L1	protein_coding	ENSG00000073146	-2.02481	0.450054	4.72148e-24	3.00025e-23
PANX2	protein_coding	ENSG00000073150	0.787505	1.17032	4.52617e-10	1.49797e-09
SELENOO	protein_coding	ENSG00000073169	-0.149547	4.04762	0.02792	0.0431837
ALPK1	protein_coding	ENSG00000073331	-2.44365	3.20891	9.43535e-138	3.50399e-136
LLGL2	protein_coding	ENSG00000073350	-0.617947	-3.16772	0.29307	0.360539
PDE8A	protein_coding	ENSG00000073417	0.980155	5.60417	2.059e-62	3.25164e-61
CLCN4	protein_coding	ENSG00000073464	-1.56866	2.30313	1.54531e-49	1.91293e-48
NLE1	protein_coding	ENSG00000073536	0.354883	4.02981	1.78668e-07	4.91302e-07
SDHA	protein_coding	ENSG00000073578	-0.132005	6.24455	0.0151707	0.0245763
SMARCE1	protein_coding	ENSG00000073584	-0.354056	2.53921	7.42445e-05	0.000161608
GSDMB	protein_coding	ENSG00000073605	-0.552531	2.91964	2.6453e-06	6.6217e-06
KDM5A	protein_coding	ENSG00000073614	0.00339102	5.89163	0.95253	0.971756
ADAM11	protein_coding	ENSG00000073670	0.528864	-1.21931	0.0648839	0.0934633
PPP2R3A	protein_coding	ENSG00000073711	1.36386	6.2156	1.43463e-143	5.62373e-142
FERMT2	protein_coding	ENSG00000073712	0.64442	8.65647	3.19908e-31	2.57679e-30
PTGS2	protein_coding	ENSG00000073756	6.79035	6.60938	0	0
IGF2BP2	protein_coding	ENSG00000073792	-0.618234	7.52907	1.69216e-32	1.40469e-31
MAP3K13	protein_coding	ENSG00000073803	0.251222	3.76452	0.000272204	0.000559571
ST6GAL1	protein_coding	ENSG00000073849	-1.33118	-0.0540541	3.58161e-13	1.42521e-12
VDAC1P1	processed_pseudogene	ENSG00000073905	-0.1328	-2.05927	0.787616	0.835149
FRY	protein_coding	ENSG00000073910	-2.95045	4.97699	0	0
PICALM	protein_coding	ENSG00000073921	1.42808	8.77465	3.10951e-126	1.02145e-124
NSF	protein_coding	ENSG00000073969	-0.145303	5.25596	0.018093	0.0289173
GLI2	protein_coding	ENSG00000074047	1.47056	6.27532	1.63323e-88	3.72226e-87
CLASP1	protein_coding	ENSG00000074054	-0.538196	5.9914	1.61514e-20	8.97925e-20
MRPS34	protein_coding	ENSG00000074071	-0.0224477	5.80017	0.796214	0.842709
NOTCH3	protein_coding	ENSG00000074181	0.308144	6.6234	3.64247e-07	9.77831e-07
CLNS1A	protein_coding	ENSG00000074201	-0.266876	5.65597	6.05345e-05	0.000133083
TEAD2	protein_coding	ENSG00000074219	-0.459481	4.96087	1.52263e-13	6.17312e-13
EED	protein_coding	ENSG00000074266	0.0660831	3.16791	0.433899	0.507221
SNCB	protein_coding	ENSG00000074317	-0.156566	-2.22404	0.761612	0.812755
TSG101	protein_coding	ENSG00000074319	-0.174976	5.76575	0.00230314	0.00421927
NCBP3	protein_coding	ENSG00000074356	0.253242	5.77427	3.44523e-06	8.54646e-06
ATP2A3	protein_coding	ENSG00000074370	-0.00725024	0.952421	0.979531	0.995674
CA12	protein_coding	ENSG00000074410	-0.227141	2.40231	0.019418	0.0308394
MGLL	protein_coding	ENSG00000074416	1.0378	8.38126	4.12415e-76	7.89045e-75
NTN4	protein_coding	ENSG00000074527	-1.75649	7.25577	5.92566e-208	3.7736e-206
BCS1L	protein_coding	ENSG00000074582	0.0869626	3.55145	0.324664	0.394861
NUAK1	protein_coding	ENSG00000074590	1.10674	5.13545	1.00441e-86	2.23146e-85
DPP8	protein_coding	ENSG00000074603	0.348005	6.08426	7.02514e-10	2.29403e-09
SLC24A1	protein_coding	ENSG00000074621	-0.935231	2.78652	5.40881e-28	3.95242e-27
ZNF532	protein_coding	ENSG00000074657	-0.352362	6.16183	4.18354e-11	1.47832e-10
SCARF1	protein_coding	ENSG00000074660	0.675872	-1.34591	0.0225597	0.0354304
LMAN1	protein_coding	ENSG00000074695	-0.0672024	8.59588	0.278144	0.344337
HACD3	protein_coding	ENSG00000074696	-0.498268	6.69429	1.13364e-16	5.34975e-16
IPCEF1	protein_coding	ENSG00000074706	-4.11799	-1.62173	5.83632e-25	3.84009e-24
ZZEF1	protein_coding	ENSG00000074755	0.200998	5.64668	0.00190892	0.00353378
ENO1	protein_coding	ENSG00000074800	0.257782	10.1658	3.00361e-06	7.48992e-06
MYDGF	protein_coding	ENSG00000074842	0.124308	7.77485	0.0425549	0.0636591
ANO8	protein_coding	ENSG00000074855	-0.343121	3.4988	2.81432e-06	7.02883e-06
TUBE1	protein_coding	ENSG00000074935	-0.999494	3.52138	2.11685e-38	2.0461e-37
ARHGEF10L	protein_coding	ENSG00000074964	0.574842	4.01891	8.9885e-17	4.26114e-16
ACTR6	protein_coding	ENSG00000075089	-0.0941018	3.63729	0.262793	0.32754
TIPIN	protein_coding	ENSG00000075131	0.137748	2.90134	0.143714	0.191359
SRI	protein_coding	ENSG00000075142	0.228432	5.249	0.000153747	0.000324298
EIF4G3	protein_coding	ENSG00000075151	-0.183385	7.52448	0.000373147	0.00075572
NUP37	protein_coding	ENSG00000075188	-0.319731	3.52386	3.3434e-05	7.54865e-05
SEMA3A	protein_coding	ENSG00000075213	0.422154	7.16893	2.50561e-15	1.11389e-14
GTSE1	protein_coding	ENSG00000075218	0.0654276	4.0967	0.351724	0.423336
SEMA3C	protein_coding	ENSG00000075223	0.816889	6.37015	3.68179e-45	4.15261e-44
TTC38	protein_coding	ENSG00000075234	-0.0461899	4.1457	0.485968	0.557894
ACAT1	protein_coding	ENSG00000075239	-0.216187	5.38314	0.000672479	0.00131894
GRAMD4	protein_coding	ENSG00000075240	-0.251129	3.66006	0.000527149	0.00104847
CELSR1	protein_coding	ENSG00000075275	0.71858	-0.27102	0.000124385	0.000264739
ZNF638	protein_coding	ENSG00000075292	-0.404143	6.32976	6.08999e-12	2.26115e-11
SLC25A40	protein_coding	ENSG00000075303	-0.64822	3.08822	3.26776e-15	1.44469e-14
TIMM21	protein_coding	ENSG00000075336	0.31217	4.41231	8.67616e-06	2.06989e-05
RASAL2	protein_coding	ENSG00000075391	1.23065	5.74551	3.46695e-102	9.03352e-101
VPS9D1	protein_coding	ENSG00000075399	-0.759326	4.43659	1.20769e-26	8.48753e-26
ZNF37A	protein_coding	ENSG00000075407	0.109541	5.30134	0.0737704	0.104917
MARK3	protein_coding	ENSG00000075413	7.64838e-05	6.40144	0.998755	1
SLC25A3	protein_coding	ENSG00000075415	-0.0498859	8.33947	0.367569	0.440035
FNDC3B	protein_coding	ENSG00000075420	-0.820813	8.28398	2.63136e-52	3.45366e-51
FOSL2	protein_coding	ENSG00000075426	-1.32573	6.44575	4.42703e-126	1.44885e-124
CACNG4	protein_coding	ENSG00000075461	1.01506	-1.94861	0.0182211	0.029101
FRYL	protein_coding	ENSG00000075539	0.256988	5.42286	9.50774e-06	2.26033e-05
TMEM131	protein_coding	ENSG00000075568	0.558074	6.99679	8.70829e-22	5.07648e-21
FSCN1	protein_coding	ENSG00000075618	0.918545	8.99763	5.0658e-60	7.63767e-59
ACTB	protein_coding	ENSG00000075624	0.527678	12.5498	2.85833e-20	1.56928e-19
MOCOS	protein_coding	ENSG00000075643	-2.24012	3.31344	1.69092e-145	6.73316e-144
PLD1	protein_coding	ENSG00000075651	-2.84605	3.58236	1.32186e-260	1.18967e-258
WDR62	protein_coding	ENSG00000075702	-0.116718	3.02944	0.388541	0.461726
DLG1	protein_coding	ENSG00000075711	0.507961	6.74052	6.66932e-20	3.60217e-19
RAB7A	protein_coding	ENSG00000075785	0.733423	8.23923	1.26434e-42	1.34517e-41
BCAP29	protein_coding	ENSG00000075790	0.511256	5.87445	4.07853e-14	1.70648e-13
SEC31B	protein_coding	ENSG00000075826	-0.748449	1.41454	0.000158345	0.000333622
SART3	protein_coding	ENSG00000075856	-0.0415461	5.42445	0.484316	0.556606
EXOSC7	protein_coding	ENSG00000075914	-0.0822667	3.4378	0.403589	0.476863
KIFAP3	protein_coding	ENSG00000075945	0.12378	3.96796	0.0806016	0.113709
MKRN2	protein_coding	ENSG00000075975	0.00998006	5.38915	0.857268	0.893536
MCM6	protein_coding	ENSG00000076003	-0.595589	4.81504	1.53402e-21	8.88353e-21
REXO2	protein_coding	ENSG00000076043	-0.270075	6.11587	7.67322e-05	0.000166797
RBM7	protein_coding	ENSG00000076053	-0.0652678	4.7491	0.407485	0.480708
RBMS2	protein_coding	ENSG00000076067	-0.806293	6.96449	2.78302e-51	3.58601e-50
BAZ2A	protein_coding	ENSG00000076108	-0.0938546	6.82119	0.114585	0.1563
PTPN23	protein_coding	ENSG00000076201	0.0987383	5.77429	0.452221	0.525922
MLH1	protein_coding	ENSG00000076242	-0.497394	4.89822	2.86769e-14	1.21077e-13
UNG	protein_coding	ENSG00000076248	-0.583337	3.8859	3.59539e-16	1.66159e-15
FMO4	protein_coding	ENSG00000076258	-0.91401	-1.98575	0.0142659	0.0232064
KLHL20	protein_coding	ENSG00000076321	-0.00933451	5.02024	0.885415	0.916699
RGS11	protein_coding	ENSG00000076344	-0.233537	0.654323	0.13894	0.185857
SLC46A1	protein_coding	ENSG00000076351	-0.279689	3.02836	0.000718578	0.00140373
PLXNA2	protein_coding	ENSG00000076356	3.9595	4.93868	0	0
SPAG5	protein_coding	ENSG00000076382	0.241049	4.26305	0.000228747	0.000473435
ANKRD13A	protein_coding	ENSG00000076513	0.271263	7.89681	2.81201e-07	7.63137e-07
ACACB	protein_coding	ENSG00000076555	-2.27209	-0.19296	2.97071e-21	1.69975e-20
TRAF4	protein_coding	ENSG00000076604	0.834202	5.34989	3.45522e-41	3.56434e-40
PAG1	protein_coding	ENSG00000076641	0.198511	4.89978	0.00102	0.00195893
GPATCH1	protein_coding	ENSG00000076650	-0.133216	3.06531	0.0812707	0.114552
ICAM3	protein_coding	ENSG00000076662	0.167567	2.64381	0.0520995	0.0765162
NT5C2	protein_coding	ENSG00000076685	-0.582323	7.23314	1.95854e-22	1.16956e-21
MCAM	protein_coding	ENSG00000076706	-0.051427	8.10763	0.338978	0.409973
GPC4	protein_coding	ENSG00000076716	-1.0995	4.8743	1.27953e-78	2.53605e-77
MBNL3	protein_coding	ENSG00000076770	-0.637187	0.547712	0.00079686	0.00154928
RAP1GAP	protein_coding	ENSG00000076864	2.60888	-1.89369	2.67952e-09	8.44199e-09
XAB2	protein_coding	ENSG00000076924	0.0655297	5.05272	0.27019	0.335573
ARHGEF1	protein_coding	ENSG00000076928	0.59246	5.93827	1.23371e-20	6.89129e-20
STXBP2	protein_coding	ENSG00000076944	-0.0179341	-1.2112	1	1
MAP2K7	protein_coding	ENSG00000076984	-0.150481	4.93126	0.0120164	0.0197861
DGKD	protein_coding	ENSG00000077044	1.30878	4.79688	8.6751e-102	2.25374e-100
CTTNBP2	protein_coding	ENSG00000077063	-1.69382	2.79705	7.24626e-83	1.529e-81
TOP2B	protein_coding	ENSG00000077097	-0.220169	7.41179	0.000168724	0.000354574
TM9SF3	protein_coding	ENSG00000077147	0.42794	8.43303	7.09825e-14	2.93514e-13
NFKB2	protein_coding	ENSG00000077150	0.871166	5.96613	5.17563e-60	7.79659e-59
UBE2T	protein_coding	ENSG00000077152	0.0236831	2.78116	0.795078	0.841695
PPP1R12B	protein_coding	ENSG00000077157	-0.818095	4.6156	4.51822e-39	4.43278e-38
DNAJC10	protein_coding	ENSG00000077232	-0.135733	7.4936	0.0161367	0.0260217
GTF3C1	protein_coding	ENSG00000077235	0.0695159	6.91751	0.187699	0.242743
IL4R	protein_coding	ENSG00000077238	1.45723	6.59925	6.08636e-140	2.31387e-138
USP33	protein_coding	ENSG00000077254	-0.182156	5.79273	0.002875	0.00519461
PAK3	protein_coding	ENSG00000077264	-0.968958	-1.07215	9.3697e-05	0.000201932
SNRPA	protein_coding	ENSG00000077312	-0.154373	5.29361	0.00692414	0.0118435
EXOSC5	protein_coding	ENSG00000077348	0.151102	1.78904	0.181955	0.236025
DYNC1I2	protein_coding	ENSG00000077380	-0.0586239	7.28496	0.379057	0.451917
LRCH4	protein_coding	ENSG00000077454	0.137168	3.56089	0.103253	0.14214
FAM76B	protein_coding	ENSG00000077458	-0.313254	3.35829	2.08317e-05	4.80542e-05
SIRT6	protein_coding	ENSG00000077463	0.748377	4.01948	1.97614e-25	1.32293e-24
POLD3	protein_coding	ENSG00000077514	-0.0216628	3.58879	0.777882	0.827015
CAPZB	protein_coding	ENSG00000077549	0.312363	7.85004	3.6152e-09	1.12791e-08
GPR137B	protein_coding	ENSG00000077585	-0.116016	4.34808	0.0611933	0.0885884
JADE1	protein_coding	ENSG00000077684	-0.918405	5.4711	6.2481e-58	9.13902e-57
SLC25A43	protein_coding	ENSG00000077713	0.885672	4.58613	2.11573e-45	2.4001e-44
UBE2A	protein_coding	ENSG00000077721	0.337996	6.47528	1.33875e-09	4.29921e-09
FGFR1	protein_coding	ENSG00000077782	0.00746807	8.49325	0.89032	0.920643
FBLN1	protein_coding	ENSG00000077942	-0.394204	8.38759	1.0314e-10	3.56256e-10
ITGA8	protein_coding	ENSG00000077943	-0.42011	5.18092	6.22758e-09	1.90488e-08
MAP2	protein_coding	ENSG00000078018	1.76832	0.722646	4.80982e-27	3.42394e-26
PIAS2	protein_coding	ENSG00000078043	-0.0655953	4.17324	0.318114	0.387751
AMPH	protein_coding	ENSG00000078053	-1.17719	3.56844	6.63777e-55	9.11917e-54
ARAF	protein_coding	ENSG00000078061	0.046526	5.74922	0.531766	0.60196
MCCC1	protein_coding	ENSG00000078070	-1.10265	3.68361	2.01525e-55	2.80576e-54
FAP	protein_coding	ENSG00000078098	-0.0227069	6.49609	0.699271	0.756092
ACER3	protein_coding	ENSG00000078124	0.546146	4.04241	5.18612e-17	2.48056e-16
UBE2K	protein_coding	ENSG00000078140	0.563756	6.14413	2.22604e-24	1.43207e-23
PIK3C3	protein_coding	ENSG00000078142	0.19607	5.49783	0.000972443	0.00187249
N4BP2	protein_coding	ENSG00000078177	0.169576	3.22767	0.0300448	0.0462429
TIGAR	protein_coding	ENSG00000078237	0.28209	1.4017	0.0130668	0.021394
TULP3	protein_coding	ENSG00000078246	-1.03541	5.60412	8.69785e-79	1.72976e-77
SYNJ2	protein_coding	ENSG00000078269	1.10382	6.84393	1.56972e-93	3.75202e-92
PPP2R5C	protein_coding	ENSG00000078304	-0.0712143	6.2045	0.194907	0.251217
PMS2P1	unprocessed_pseudogene	ENSG00000078319	-0.123963	2.51646	0.198058	0.254762
GNB1	protein_coding	ENSG00000078369	0.329852	9.17718	1.00515e-09	3.25157e-09
HOXA9	protein_coding	ENSG00000078399	0.796489	-3.16731	0.108895	0.149127
EDN1	protein_coding	ENSG00000078401	2.32326	4.56281	1.95472e-237	1.49918e-235
MLLT10	protein_coding	ENSG00000078403	0.0600404	4.57723	0.321285	0.391211
ZCWPW1	protein_coding	ENSG00000078487	-0.804802	0.443006	9.31918e-07	2.42178e-06
NRDC	protein_coding	ENSG00000078618	0.0211419	7.87915	0.711582	0.766834
VDAC3	protein_coding	ENSG00000078668	0.0210759	5.99191	0.716777	0.771301
PCM1	protein_coding	ENSG00000078674	-0.465079	6.40535	2.01763e-18	1.02568e-17
TNRC6C	protein_coding	ENSG00000078687	0.485764	4.28126	5.65168e-16	2.59286e-15
CBFA2T2	protein_coding	ENSG00000078699	-0.17005	4.04608	0.0129087	0.0211646
ITCH	protein_coding	ENSG00000078747	0.431847	6.64569	6.55603e-13	2.57282e-12
TP53INP2	protein_coding	ENSG00000078804	0.298679	6.33645	3.49416e-06	8.66174e-06
SDF4	protein_coding	ENSG00000078808	-0.0517814	8.27226	0.340432	0.411289
TOLLIP	protein_coding	ENSG00000078902	0.6387	5.68904	1.90168e-30	1.49424e-29
UBE2D4	protein_coding	ENSG00000078967	-0.317818	3.37257	8.32141e-05	0.000180442
RUNX1T1	protein_coding	ENSG00000079102	-1.41855	2.54664	1.09707e-61	1.70806e-60
THOC1	protein_coding	ENSG00000079134	0.258194	4.19344	0.000545513	0.00108353
FKBP7	protein_coding	ENSG00000079150	-0.38257	5.17835	6.52142e-10	2.13389e-09
OSBPL6	protein_coding	ENSG00000079156	1.03826	2.6202	5.5111e-26	3.77684e-25
SLC1A3	protein_coding	ENSG00000079215	2.21261	-1.14861	8.52001e-17	4.04339e-16
XRCC5	protein_coding	ENSG00000079246	0.247081	8.16123	8.34481e-06	1.99569e-05
LXN	protein_coding	ENSG00000079257	0.708691	3.94825	1.72542e-19	9.13733e-19
SP140	protein_coding	ENSG00000079263	2.47525	-1.12349	2.45626e-16	1.14172e-15
MKNK1	protein_coding	ENSG00000079277	-0.217065	4.35343	0.00110474	0.00211087
TNS1	protein_coding	ENSG00000079308	2.08164	8.51191	1.39471e-291	1.55713e-289
REXO1	protein_coding	ENSG00000079313	0.703271	5.4269	1.5322e-31	1.24783e-30
SAR1A	protein_coding	ENSG00000079332	0.240733	8.00857	4.96653e-05	0.000110326
CDC14A	protein_coding	ENSG00000079335	-0.694724	2.32537	2.46417e-11	8.84213e-11
RAPGEF3	protein_coding	ENSG00000079337	0.488339	1.51287	0.000363418	0.000737624
SENP1	protein_coding	ENSG00000079387	-0.0871911	4.44562	0.205723	0.263771
CIC	protein_coding	ENSG00000079432	-0.0831228	6.24324	0.246821	0.30969
LIPE	protein_coding	ENSG00000079435	-0.325486	1.36761	0.00899647	0.0151241
FDFT1	protein_coding	ENSG00000079459	-1.04412	7.08336	7.89676e-81	1.61975e-79
PAFAH1B3	protein_coding	ENSG00000079462	-0.263821	2.86104	0.00357204	0.00637349
OPHN1	protein_coding	ENSG00000079482	-0.366441	2.93933	2.46737e-05	5.65253e-05
KIF22	protein_coding	ENSG00000079616	-0.265952	4.29461	3.49327e-05	7.87091e-05
CARMIL1	protein_coding	ENSG00000079691	-1.41183	2.944	3.7502e-52	4.90026e-51
PGM1	protein_coding	ENSG00000079739	-0.503911	5.11005	5.08719e-18	2.53999e-17
DDX1	protein_coding	ENSG00000079785	0.0086198	6.92887	0.876944	0.910172
DNM2	protein_coding	ENSG00000079805	0.301017	7.06967	1.17901e-08	3.53223e-08
EPB41L2	protein_coding	ENSG00000079819	-0.688877	9.06434	1.5419e-34	1.33986e-33
RIMS1	protein_coding	ENSG00000079841	1.19695	-2.05065	0.000324204	0.000661304
[truncated: 16,432 more rows]

## Sheet: 3h_to_6h
gene_names	gene_biotype	gene_id	logFC	logCPM	PValue	FDR
[truncated: 17,640 more rows]
