# Supplementary material
Source: HighWire-hosted journal article supplement (doi:10.1101/rna.075309.120)
Supplement: Supplementary_Table_3_GO_analysis_all_results.xlsx [file Supplementary_Table_3_GO_analysis_all_results.xlsx]

## Sheet: GO_A_to_Q_up
	ID	Description	GeneRatio	BgRatio	pvalue	p.adjust	qvalue	geneID	Count
GO:0016126	GO:0016126	sterol biosynthetic process	27/350	68/12280	1.66379e-24	5.9098e-21	5.21556e-21	CYP51A1/NPC1L1/MSMO1/IDI1/FDFT1/SCD/SQLE/SC5D/MVK/HMGCS1/HMGCR/DHCR24/ACAT2/HSD17B7/ERG28/EBP/NSDHL/TM7SF2/LSS/FDPS/MVD/FASN/FAXDC2/ELOVL6/DHCR7/INSIG1/SREBF2	27
GO:1902653	GO:1902653	secondary alcohol biosynthetic process	26/350	63/12280	3.65433e-24	6.49009e-21	5.72768e-21	CYP51A1/NPC1L1/MSMO1/IDI1/FDFT1/SCD/SQLE/SC5D/MVK/HMGCS1/HMGCR/DHCR24/ACAT2/HSD17B7/ERG28/EBP/NSDHL/TM7SF2/LSS/FDPS/MVD/FASN/ELOVL6/DHCR7/INSIG1/SREBF2	26
GO:0006695	GO:0006695	cholesterol biosynthetic process	25/350	62/12280	5.67878e-23	6.72367e-20	5.93382e-20	CYP51A1/NPC1L1/MSMO1/IDI1/FDFT1/SCD/SQLE/SC5D/MVK/HMGCS1/HMGCR/DHCR24/ACAT2/HSD17B7/EBP/NSDHL/TM7SF2/LSS/FDPS/MVD/FASN/ELOVL6/DHCR7/INSIG1/SREBF2	25
GO:0016125	GO:0016125	sterol metabolic process	32/350	120/12280	1.25501e-22	1.11445e-19	9.83535e-20	CYP51A1/CYP26B1/NPC1L1/MSMO1/IDI1/FDFT1/SCD/SQLE/SC5D/MVK/HMGCS1/HMGCR/DHCR24/ACAT2/LDLR/HSD17B7/ERG28/CYP1B1/EBP/NSDHL/TM7SF2/LSS/FDPS/LIPC/MVD/PCSK9/FASN/FAXDC2/ELOVL6/DHCR7/INSIG1/SREBF2	32
GO:1902652	GO:1902652	secondary alcohol metabolic process	29/350	112/12280	3.26384e-20	2.31863e-17	2.04626e-17	CYP51A1/NPC1L1/MSMO1/IDI1/FDFT1/SCD/SQLE/SC5D/MVK/HMGCS1/HMGCR/DHCR24/ACAT2/LDLR/HSD17B7/ERG28/EBP/NSDHL/TM7SF2/LSS/FDPS/LIPC/MVD/PCSK9/FASN/ELOVL6/DHCR7/INSIG1/SREBF2	29
GO:0008203	GO:0008203	cholesterol metabolic process	28/350	108/12280	1.43374e-19	8.48774e-17	7.49066e-17	CYP51A1/NPC1L1/MSMO1/IDI1/FDFT1/SCD/SQLE/SC5D/MVK/HMGCS1/HMGCR/DHCR24/ACAT2/LDLR/HSD17B7/EBP/NSDHL/TM7SF2/LSS/FDPS/LIPC/MVD/PCSK9/FASN/ELOVL6/DHCR7/INSIG1/SREBF2	28
GO:0006694	GO:0006694	steroid biosynthetic process	29/350	143/12280	4.44491e-17	2.25548e-14	1.99052e-14	CYP51A1/NPC1L1/MSMO1/IDI1/FDFT1/SCD/SQLE/SC5D/MVK/HMGCS1/HMGCR/DHCR24/ACAT2/HSD17B7/ERG28/EBP/NSDHL/TM7SF2/BMP6/LSS/FDPS/STARD4/MVD/FASN/FAXDC2/ELOVL6/DHCR7/INSIG1/SREBF2	29
GO:0046165	GO:0046165	alcohol biosynthetic process	27/350	125/12280	1.02841e-16	4.56616e-14	4.02976e-14	CYP51A1/NPC1L1/MSMO1/IDI1/FDFT1/SCD/SQLE/SC5D/MVK/HMGCS1/HMGCR/DHCR24/ACAT2/HSD17B7/ERG28/EBP/NSDHL/TM7SF2/BMP6/LSS/FDPS/MVD/FASN/ELOVL6/DHCR7/INSIG1/SREBF2	27
GO:0008202	GO:0008202	steroid metabolic process	34/350	214/12280	2.14838e-16	8.47894e-14	7.4829e-14	CYP51A1/CYP26B1/NPC1L1/MSMO1/IDI1/FDFT1/SCD/SQLE/SC5D/MVK/HMGCS1/HMGCR/DHCR24/ACAT2/LDLR/HSD17B7/ERG28/CYP1B1/EBP/NSDHL/TM7SF2/BMP6/LSS/FDPS/STARD4/LIPC/MVD/PCSK9/FASN/FAXDC2/ELOVL6/DHCR7/INSIG1/SREBF2	34
GO:0045540	GO:0045540	regulation of cholesterol biosynthetic process	17/350	42/12280	4.8981e-16	1.58164e-13	1.39584e-13	CYP51A1/IDI1/FDFT1/SCD/SQLE/SC5D/MVK/HMGCS1/HMGCR/TM7SF2/LSS/FDPS/MVD/FASN/ELOVL6/DHCR7/SREBF2	17
GO:0106118	GO:0106118	regulation of sterol biosynthetic process	17/350	42/12280	4.8981e-16	1.58164e-13	1.39584e-13	CYP51A1/IDI1/FDFT1/SCD/SQLE/SC5D/MVK/HMGCS1/HMGCR/TM7SF2/LSS/FDPS/MVD/FASN/ELOVL6/DHCR7/SREBF2	17
GO:0090181	GO:0090181	regulation of cholesterol metabolic process	18/350	52/12280	1.76362e-15	5.22031e-13	4.60707e-13	CYP51A1/IDI1/FDFT1/SCD/SQLE/SC5D/MVK/HMGCS1/HMGCR/LDLR/TM7SF2/LSS/FDPS/MVD/FASN/ELOVL6/DHCR7/SREBF2	18
GO:1901617	GO:1901617	organic hydroxy compound biosynthetic process	30/350	180/12280	3.58128e-15	9.78515e-13	8.63566e-13	CYP51A1/NPC1L1/MSMO1/IDI1/FDFT1/SCD/SQLE/SC5D/MVK/HMGCS1/HMGCR/DHCR24/ACAT2/HSD17B7/ERG28/PSAT1/EBP/NSDHL/TM7SF2/BMP6/LSS/FDPS/STARD4/MVD/FASN/FAXDC2/ELOVL6/DHCR7/INSIG1/SREBF2	30
GO:0050810	GO:0050810	regulation of steroid biosynthetic process	20/350	72/12280	5.907e-15	1.49869e-12	1.32264e-12	CYP51A1/IDI1/FDFT1/SCD/SQLE/SC5D/MVK/HMGCS1/HMGCR/TM7SF2/BMP6/LSS/FDPS/STARD4/MVD/FASN/ELOVL6/DHCR7/INSIG1/SREBF2	20
GO:1902930	GO:1902930	regulation of alcohol biosynthetic process	18/350	61/12280	4.2925e-14	1.01646e-11	8.97057e-12	CYP51A1/IDI1/FDFT1/SCD/SQLE/SC5D/MVK/HMGCS1/HMGCR/TM7SF2/BMP6/LSS/FDPS/MVD/FASN/ELOVL6/DHCR7/SREBF2	18
GO:0019218	GO:0019218	regulation of steroid metabolic process	21/350	90/12280	5.57113e-14	1.23679e-11	1.0915e-11	CYP51A1/IDI1/FDFT1/SCD/SQLE/SC5D/MVK/HMGCS1/HMGCR/LDLR/TM7SF2/BMP6/LSS/FDPS/STARD4/MVD/FASN/ELOVL6/DHCR7/INSIG1/SREBF2	21
GO:0006066	GO:0006066	alcohol metabolic process	34/350	260/12280	8.26338e-14	1.72656e-11	1.52374e-11	CYP51A1/NPC1L1/MSMO1/IDI1/FDFT1/SCD/SQLE/SC5D/MVK/HMGCS1/HMGCR/DHCR24/ACAT2/ALDH1A2/LDLR/ACSS2/HSD17B7/ERG28/CYP1B1/EBP/NSDHL/TM7SF2/BMP6/LSS/FDPS/LIPC/MVD/PCSK9/FASN/ELOVL6/DHCR7/INSIG1/SULT1C4/SREBF2	34
GO:0046890	GO:0046890	regulation of lipid biosynthetic process	25/350	140/12280	1.51573e-13	2.99104e-11	2.63967e-11	CYP51A1/PDK4/IDI1/FDFT1/SCD/SQLE/SC5D/MVK/HMGCS1/HMGCR/FABP3/LDLR/HTR2B/IDH1/TM7SF2/BMP6/LSS/FDPS/STARD4/MVD/FASN/ELOVL6/DHCR7/INSIG1/SREBF2	25
GO:1901615	GO:1901615	organic hydroxy compound metabolic process	39/350	354/12280	3.18687e-13	5.95776e-11	5.25789e-11	CYP51A1/CYP26B1/NPC1L1/MSMO1/IDI1/SNCB/FDFT1/SCD/SQLE/SC5D/MVK/HMGCS1/HMGCR/DHCR24/ACAT2/ALDH1A2/LDLR/ACSS2/HSD17B7/ERG28/PSAT1/CYP1B1/EBP/NSDHL/TM7SF2/BMP6/LSS/FDPS/STARD4/LIPC/MVD/PCSK9/FASN/FAXDC2/ELOVL6/DHCR7/INSIG1/SULT1C4/SREBF2	39
GO:0010469	GO:0010469	regulation of signaling receptor activity	33/350	289/12280	8.92068e-12	1.58431e-09	1.3982e-09	CX3CL1/IL32/PTHLH/FGF14/FGF9/OGN/KLHL24/TNFSF4/TNFSF18/TNFSF9/GDF5/MSTN/INHBE/WNT9A/GDF7/TSLP/BMP6/FGF18/GDF6/IL34/FGF17/PCSK9/CXCL8/PDGFD/IL16/LYNX1/TNFSF15/NOG/ADRA2C/MAPT/UTS2B/NPTXR/GDF10	33
GO:0019216	GO:0019216	regulation of lipid metabolic process	29/350	299/12280	7.93266e-09	1.34175e-06	1.18413e-06	CYP51A1/PDK4/IDI1/FDFT1/SCD/PIK3IP1/SQLE/RARRES2/SC5D/MVK/HMGCS1/HMGCR/FABP3/LDLR/HTR2B/KLF4/IDH1/FADS1/TM7SF2/BMP6/LSS/FDPS/STARD4/MVD/FASN/ELOVL6/DHCR7/INSIG1/SREBF2	29
GO:0062012	GO:0062012	regulation of small molecule metabolic process	26/350	276/12280	8.74716e-08	1.40047e-05	1.23596e-05	CYP51A1/PDK4/IDI1/FDFT1/P2RX7/SCD/SQLE/SC5D/MVK/HMGCS1/HMGCR/FABP3/SLC25A23/LDLR/TM7SF2/FOXO1/BMP6/LSS/FDPS/STARD4/MVD/FASN/ELOVL6/DHCR7/INSIG1/SREBF2	26
GO:0008299	GO:0008299	isoprenoid biosynthetic process	8/350	22/12280	9.06838e-08	1.40047e-05	1.23596e-05	IDI1/FDFT1/MVK/HMGCS1/HMGCR/ALDH1A2/FDPS/MVD	8
GO:0007268	GO:0007268	chemical synaptic transmission	34/350	441/12280	1.26799e-07	1.80156e-05	1.58993e-05	CX3CL1/SYT7/ATP1A2/CAMK2B/SYT1/SNCB/PCDHB4/ACHE/P2RX7/P2RX6/FGF14/PCDHB5/PCDHB6/PCDHB10/PCDHB14/EGR2/DTNA/KCNMB4/HTR2B/SERPINE2/TUBB2B/PTPRN2/GRIA1/LRP8/KCNB1/ADCY1/NSG1/CALB2/PCDHB9/LYNX1/SEPT5/MAPT/PCDHB11/NPTXR	34
GO:0098916	GO:0098916	anterograde trans-synaptic signaling	34/350	441/12280	1.26799e-07	1.80156e-05	1.58993e-05	CX3CL1/SYT7/ATP1A2/CAMK2B/SYT1/SNCB/PCDHB4/ACHE/P2RX7/P2RX6/FGF14/PCDHB5/PCDHB6/PCDHB10/PCDHB14/EGR2/DTNA/KCNMB4/HTR2B/SERPINE2/TUBB2B/PTPRN2/GRIA1/LRP8/KCNB1/ADCY1/NSG1/CALB2/PCDHB9/LYNX1/SEPT5/MAPT/PCDHB11/NPTXR	34
GO:0099537	GO:0099537	trans-synaptic signaling	34/350	447/12280	1.74964e-07	2.39028e-05	2.10949e-05	CX3CL1/SYT7/ATP1A2/CAMK2B/SYT1/SNCB/PCDHB4/ACHE/P2RX7/P2RX6/FGF14/PCDHB5/PCDHB6/PCDHB10/PCDHB14/EGR2/DTNA/KCNMB4/HTR2B/SERPINE2/TUBB2B/PTPRN2/GRIA1/LRP8/KCNB1/ADCY1/NSG1/CALB2/PCDHB9/LYNX1/SEPT5/MAPT/PCDHB11/NPTXR	34
GO:0099536	GO:0099536	synaptic signaling	34/350	452/12280	2.27649e-07	2.99485e-05	2.64304e-05	CX3CL1/SYT7/ATP1A2/CAMK2B/SYT1/SNCB/PCDHB4/ACHE/P2RX7/P2RX6/FGF14/PCDHB5/PCDHB6/PCDHB10/PCDHB14/EGR2/DTNA/KCNMB4/HTR2B/SERPINE2/TUBB2B/PTPRN2/GRIA1/LRP8/KCNB1/ADCY1/NSG1/CALB2/PCDHB9/LYNX1/SEPT5/MAPT/PCDHB11/NPTXR	34
GO:0098742	GO:0098742	cell-cell adhesion via plasma-membrane adhesion molecules	19/350	168/12280	3.07323e-07	3.89861e-05	3.44063e-05	CX3CL1/PCDHB4/PCDHA6/ARVCF/PCDHB5/PCDHB6/PCDHB10/PCDHB14/PCDHB12/MMP24/KLF4/PCDHB18P/CDHR1/TENM4/VCAM1/FAT3/PCDHB9/CADM1/PCDHB11	19
GO:0006720	GO:0006720	isoprenoid metabolic process	12/350	75/12280	1.23651e-06	0.000151451	0.000133659	CYP26B1/IDI1/FDFT1/RARRES2/MVK/HMGCS1/HMGCR/ALDH1A2/CYP1B1/LRP8/FDPS/MVD	12
GO:0016339	GO:0016339	calcium-dependent cell-cell adhesion via plasma membrane cell adhesion molecules	8/350	30/12280	1.35929e-06	0.000160939	0.000142033	PCDHB4/ARVCF/PCDHB5/PCDHB6/PCDHB10/PCDHB14/PCDHB9/PCDHB11	8
GO:0007416	GO:0007416	synapse assembly	14/350	117/12280	5.81255e-06	0.000666006	0.000587768	MUSK/NTN1/PCDHB4/ACHE/PCDHB5/PCDHB6/PCDHB10/PCDHB14/EPHA7/CNTN5/SPTBN2/PCDHB9/SLITRK6/PCDHB11	14
GO:0007156	GO:0007156	homophilic cell adhesion via plasma membrane adhesion molecules	13/350	105/12280	8.5913e-06	0.000953634	0.000841608	PCDHB4/PCDHA6/PCDHB5/PCDHB6/PCDHB10/PCDHB14/PCDHB12/PCDHB18P/CDHR1/FAT3/PCDHB9/CADM1/PCDHB11	13
GO:0050808	GO:0050808	synapse organization	23/350	290/12280	9.36707e-06	0.00100824	0.000889797	CX3CL1/MUSK/CAMK2B/NTN1/SNCB/PAK3/PCDHB4/ACHE/PCDHB5/PCDHB6/PCDHB10/PCDHB14/C1QL1/EPHA7/CNTN5/RAB39B/TIAM1/LRP8/SPTBN2/PCDHB9/SLITRK6/MAPT/PCDHB11	23
GO:0009593	GO:0009593	detection of chemical stimulus	8/350	39/12280	1.14186e-05	0.00119291	0.00105278	SYT1/TRPA1/KCNMB4/DRGX/OR51E2/TLR1/ASIC3/OR10A6	8
GO:0001501	GO:0001501	skeletal system development	27/350	382/12280	1.32342e-05	0.00134308	0.00118531	CYP26B1/LTF/PTHLH/P2RX7/CHRD/FGF9/ITGB8/PAPPA2/GPR68/SOX4/GDF5/WFIKKN1/TTC9/LUM/WNT9A/EBP/RSPO2/BMP6/FGF18/GDF6/ALPL/MAF/NOG/INSIG1/SULF2/VIT/GDF10	27
GO:0006644	GO:0006644	phospholipid metabolic process	26/350	364/12280	1.59764e-05	0.00157634	0.00139116	IDI1/FDFT1/ACHE/PLA2G3/PIK3IP1/PNPLA3/LIPG/FGF9/PLA2G4C/MVK/HMGCS1/PLPPR5/FABP3/LDLR/LPIN1/HTR2B/KLF4/IDH1/FADS1/FGF18/FGF17/FDPS/LIPC/MVD/PCSK9/PCYT2	26
GO:0009612	GO:0009612	response to mechanical stimulus	15/350	154/12280	3.34093e-05	0.00320729	0.00283052	CLCN6/DCN/ATP1A2/P2RX7/TRPA1/IGFBP2/PPL/KCNJ2/GDF5/SERPINE2/BMP6/PIEZO2/SLITRK6/ASIC3/TXNIP	15
GO:0015850	GO:0015850	organic hydroxy compound transport	14/350	139/12280	4.20695e-05	0.00393239	0.00347044	SYT7/NPC1L1/SYT1/LIPG/CLU/LDLR/BMP6/KCNB1/STARD4/LIPC/PCSK9/ADRA2C/SREBF2/ASIC3	14
GO:0060393	GO:0060393	regulation of pathway-restricted SMAD protein phosphorylation	8/350	47/12280	4.78413e-05	0.00431547	0.00380852	GDF5/MSTN/INHBE/GDF7/BMP6/GDF6/NOG/GDF10	8
GO:0010862	GO:0010862	positive regulation of pathway-restricted SMAD protein phosphorylation	7/350	35/12280	4.85977e-05	0.00431547	0.00380852	GDF5/MSTN/INHBE/GDF7/BMP6/GDF6/GDF10	7
GO:0006935	GO:0006935	chemotaxis	27/350	419/12280	6.67489e-05	0.00578274	0.00510342	CX3CL1/NRXN3/CYFIP2/NTN1/CRMP1/SEMA6A/RARRES2/EGR2/ACKR4/MTUS1/EPHA7/PLXNC1/TUBB2B/SEMA6D/MSTN/GDF7/SEMA3D/TIAM1/FGF18/VCAM1/DRGX/CXCL8/PDGFD/IL16/SPTBN2/CAMK1D/NOG	27
GO:0042330	GO:0042330	taxis	27/350	421/12280	7.2357e-05	0.00611934	0.00540048	CX3CL1/NRXN3/CYFIP2/NTN1/CRMP1/SEMA6A/RARRES2/EGR2/ACKR4/MTUS1/EPHA7/PLXNC1/TUBB2B/SEMA6D/MSTN/GDF7/SEMA3D/TIAM1/FGF18/VCAM1/DRGX/CXCL8/PDGFD/IL16/SPTBN2/CAMK1D/NOG	27
GO:0060389	GO:0060389	pathway-restricted SMAD protein phosphorylation	8/350	50/12280	7.58225e-05	0.00626329	0.00552752	GDF5/MSTN/INHBE/GDF7/BMP6/GDF6/NOG/GDF10	8
GO:0030301	GO:0030301	cholesterol transport	9/350	65/12280	8.75587e-05	0.00706837	0.00623803	SYT7/NPC1L1/LIPG/CLU/LDLR/STARD4/LIPC/PCSK9/SREBF2	9
GO:0061448	GO:0061448	connective tissue development	17/350	208/12280	9.54336e-05	0.00753289	0.00664798	SOX8/PTHLH/FGF9/ITGB8/GDF5/LUM/WNT9A/GDF7/RSPO2/BMP6/FGF18/GDF6/PDGFD/MAF/NOG/SULF2/VIT	17
GO:0042632	GO:0042632	cholesterol homeostasis	8/350	52/12280	0.00010114	0.00764357	0.00674566	LIPG/TMEM97/FABP3/LDLR/LIPC/PCSK9/INSIG1/SREBF2	8
GO:0060395	GO:0060395	SMAD protein signal transduction	8/350	52/12280	0.00010114	0.00764357	0.00674566	GDF5/MSTN/CILP/INHBE/GDF7/BMP6/GDF6/GDF10	8
GO:0090092	GO:0090092	regulation of transmembrane receptor protein serine/threonine kinase signaling pathway	15/350	170/12280	0.000104389	0.00772479	0.00681733	LTBP4/CHRD/FGF9/ASPN/GDF5/WFIKKN1/MSTN/CILP/INHBE/GDF7/CDKN2B/BMP6/GDF6/NOG/GDF10	15
GO:0010817	GO:0010817	regulation of hormone levels	22/350	318/12280	0.000115418	0.0082552	0.00728544	CYP26B1/SOX8/SYT7/NNAT/ACHE/LTBP4/PCSK1N/CPE/HMGCR/GPR68/SOX4/PCSK2/ALDH1A2/HSD17B7/CYP1B1/BMP6/PTPRN2/TIAM1/KCNB1/DHCR7/ADCY5/ADRA2C	22
GO:0055092	GO:0055092	sterol homeostasis	8/350	53/12280	0.000116205	0.0082552	0.00728544	LIPG/TMEM97/FABP3/LDLR/LIPC/PCSK9/INSIG1/SREBF2	8
GO:0032330	GO:0032330	regulation of chondrocyte differentiation	7/350	41/12280	0.000140275	0.00976974	0.00862206	PTHLH/GDF5/WNT9A/BMP6/FGF18/GDF6/MAF	7
GO:0061035	GO:0061035	regulation of cartilage development	8/350	55/12280	0.000151921	0.0103773	0.00915829	PTHLH/GDF5/WNT9A/BMP6/FGF18/GDF6/MAF/NOG	8
GO:0006869	GO:0006869	lipid transport	18/350	238/12280	0.000160919	0.0107846	0.00951768	SYT7/NPC1L1/P2RX7/PLA2G3/LIPG/MAP2K6/CLU/FABP3/ABCC4/LDLR/ABCA8/BMP6/ABCA6/STARD4/LIPC/ABCA3/PCSK9/SREBF2	18
GO:0051216	GO:0051216	cartilage development	14/350	159/12280	0.000180567	0.0118773	0.010482	PTHLH/FGF9/ITGB8/GDF5/LUM/WNT9A/RSPO2/BMP6/FGF18/GDF6/MAF/NOG/SULF2/VIT	14
GO:0032101	GO:0032101	regulation of response to external stimulus	29/350	499/12280	0.000218936	0.0139245	0.0122888	CX3CL1/LTF/RTN4R/SEMA6A/RARRES2/MVK/C7/HMGCR/TNFSF4/CLU/MTUS1/LDLR/SERPINE2/KLF4/TUBB2B/SEMA6D/MSTN/TSLP/BMP6/SEMA3D/TIAM1/FGF18/DMTN/PDPN/KLKB1/CXCL8/PDGFD/IL16/CAMK1D	29
GO:0006721	GO:0006721	terpenoid metabolic process	8/350	58/12280	0.000222056	0.0139245	0.0122888	CYP26B1/FDFT1/RARRES2/HMGCS1/ALDH1A2/CYP1B1/LRP8/FDPS	8
GO:0050708	GO:0050708	regulation of protein secretion	20/350	288/12280	0.000223451	0.0139245	0.0122888	CX3CL1/SYT7/NNAT/ACHE/P2RX7/HMGCR/TNFSF4/GPR68/SOX4/PTPN22/HTR2B/TSLP/BMP6/TIAM1/KCNB1/OR51E2/ADCY5/TLR1/CADM1/ADRA2C	20
GO:0032103	GO:0032103	positive regulation of response to external stimulus	15/350	183/12280	0.000236476	0.0144821	0.0127809	CX3CL1/RARRES2/TNFSF4/LDLR/TUBB2B/MSTN/TSLP/BMP6/TIAM1/FGF18/KLKB1/CXCL8/PDGFD/IL16/CAMK1D	15
GO:0015918	GO:0015918	sterol transport	9/350	75/12280	0.000267955	0.0161318	0.0142368	SYT7/NPC1L1/LIPG/CLU/LDLR/STARD4/LIPC/PCSK9/SREBF2	9
GO:0001503	GO:0001503	ossification	20/350	293/12280	0.000280259	0.0165913	0.0146423	SOX8/LTF/ACHE/PTHLH/P2RX7/CHRD/FGF9/ASPN/EGR2/GDF5/ITGA11/RSPO2/BMP6/FGF18/ALPL/CLEC3B/MN1/FASN/NOG/GDF10	20
GO:0051606	GO:0051606	detection of stimulus	13/350	147/12280	0.000292482	0.0170311	0.0150304	SYT1/TRPA1/SOX4/MMP24/KCNMB4/SERPINE2/PIEZO2/DRGX/OR51E2/TLR1/CADM1/ASIC3/OR10A6	13
GO:0050920	GO:0050920	regulation of chemotaxis	13/350	148/12280	0.000312571	0.0176904	0.0156122	SEMA6A/RARRES2/MTUS1/TUBB2B/SEMA6D/MSTN/SEMA3D/TIAM1/FGF18/CXCL8/PDGFD/IL16/CAMK1D	13
GO:0010720	GO:0010720	positive regulation of cell development	25/350	412/12280	0.000313765	0.0176904	0.0156122	SOX8/CX3CL1/CAMK2B/NTN1/SYT1/TRPC5/PAK3/SEMA6A/UNC13D/PLPPR5/GPR68/GDF5/SERPINE2/PLXNC1/TUBB2B/GDF7/TENM4/BMP6/TIAM1/GDF6/LRP8/DMTN/CAMK1D/ADRA2C/MAPT	25
GO:0050804	GO:0050804	modulation of chemical synaptic transmission	20/350	297/12280	0.00033444	0.0185614	0.016381	CX3CL1/SYT7/ATP1A2/CAMK2B/SYT1/ACHE/FGF14/EGR2/KCNMB4/SERPINE2/TUBB2B/GRIA1/LRP8/KCNB1/ADCY1/NSG1/CALB2/SEPT5/MAPT/NPTXR	20
GO:0099177	GO:0099177	regulation of trans-synaptic signaling	20/350	298/12280	0.000349337	0.0190899	0.0168474	CX3CL1/SYT7/ATP1A2/CAMK2B/SYT1/ACHE/FGF14/EGR2/KCNMB4/SERPINE2/TUBB2B/GRIA1/LRP8/KCNB1/ADCY1/NSG1/CALB2/SEPT5/MAPT/NPTXR	20
GO:0002062	GO:0002062	chondrocyte differentiation	10/350	96/12280	0.000398274	0.0214344	0.0189164	PTHLH/FGF9/GDF5/WNT9A/BMP6/FGF18/GDF6/MAF/SULF2/VIT	10
GO:0006084	GO:0006084	acetyl-CoA metabolic process	6/350	35/12280	0.000414158	0.0219566	0.0193773	PDK4/MVK/HMGCS1/ACSS2/MVD/FASN	6
GO:0090100	GO:0090100	positive regulation of transmembrane receptor protein serine/threonine kinase signaling pathway	9/350	80/12280	0.00043676	0.0228143	0.0201342	FGF9/GDF5/MSTN/INHBE/GDF7/CDKN2B/BMP6/GDF6/GDF10	9
GO:0006954	GO:0006954	inflammatory response	25/350	422/12280	0.000448625	0.0230944	0.0203815	CYP26B1/CX3CL1/HDAC9/P2RX7/UNC13D/PLA2G4C/RARRES2/MVK/C7/TNFSF4/GPR68/CLU/LDLR/KLF4/TSLP/BMP6/IL34/VCAM1/PTX3/KLKB1/IL31RA/CXCL8/TLR1/CAMK1D/MAPT	25
GO:0002791	GO:0002791	regulation of peptide secretion	20/350	305/12280	0.000470826	0.0238911	0.0210845	CX3CL1/SYT7/NNAT/ACHE/P2RX7/HMGCR/TNFSF4/GPR68/SOX4/PTPN22/HTR2B/TSLP/BMP6/TIAM1/KCNB1/OR51E2/ADCY5/TLR1/CADM1/ADRA2C	20
GO:0050906	GO:0050906	detection of stimulus involved in sensory perception	7/350	50/12280	0.00050029	0.0245142	0.0216344	TRPA1/MMP24/SERPINE2/PIEZO2/OR51E2/ASIC3/OR10A6	7
GO:0071804	GO:0071804	cellular potassium ion transport	11/350	117/12280	0.00050381	0.0245142	0.0216344	ATP1A2/KLHL24/KCNJ5/KCNJ2/KCNMB4/ANK2/KCNJ6/KCNB1/KCNT2/KCNA3/SLC9A9	11
GO:0071805	GO:0071805	potassium ion transmembrane transport	11/350	117/12280	0.00050381	0.0245142	0.0216344	ATP1A2/KLHL24/KCNJ5/KCNJ2/KCNMB4/ANK2/KCNJ6/KCNB1/KCNT2/KCNA3/SLC9A9	11
GO:0010876	GO:0010876	lipid localization	18/350	263/12280	0.000543099	0.0260687	0.0230064	SYT7/NPC1L1/P2RX7/PLA2G3/LIPG/MAP2K6/CLU/FABP3/ABCC4/LDLR/ABCA8/BMP6/ABCA6/STARD4/LIPC/ABCA3/PCSK9/SREBF2	18
GO:0007409	GO:0007409	axonogenesis	22/350	361/12280	0.000674077	0.0319243	0.0281741	NRXN3/RTN4R/CYFIP2/NTN1/TRPC5/CRMP1/PAK3/SEMA6A/EGR2/EPHA7/PLXNC1/TUBB2B/SEMA6D/GDF7/SEMA3D/TIAM1/ADCY1/DRGX/SPTBN2/NOG/SLITRK6/MAPT	22
GO:0051047	GO:0051047	positive regulation of secretion	18/350	269/12280	0.000707769	0.0330789	0.029193	SYT7/NNAT/SYT1/ACHE/P2RX7/UNC13D/MAP2K6/TNFSF4/GPR68/SOX4/PTPN22/HTR2B/TSLP/BMP6/KCNB1/OR51E2/TLR1/CADM1	18
GO:0002790	GO:0002790	peptide secretion	23/350	387/12280	0.00072237	0.0333228	0.0294083	CX3CL1/SYT7/NNAT/ACHE/P2RX7/LTBP4/HMGCR/TNFSF4/GPR68/SOX4/PTPN22/HTR2B/TSLP/BMP6/PTPRN2/TIAM1/KCNB1/DMTN/OR51E2/ADCY5/TLR1/CADM1/ADRA2C	23
GO:0007411	GO:0007411	axon guidance	15/350	204/12280	0.00074914	0.0334773	0.0295447	NRXN3/CYFIP2/NTN1/CRMP1/SEMA6A/EGR2/EPHA7/PLXNC1/TUBB2B/SEMA6D/GDF7/SEMA3D/DRGX/SPTBN2/NOG	15
GO:0050769	GO:0050769	positive regulation of neurogenesis	22/350	364/12280	0.000752296	0.0334773	0.0295447	SOX8/CX3CL1/CAMK2B/NTN1/SYT1/TRPC5/PAK3/SEMA6A/PLPPR5/GDF5/SERPINE2/PLXNC1/TUBB2B/GDF7/TENM4/BMP6/TIAM1/GDF6/LRP8/CAMK1D/ADRA2C/MAPT	22
GO:0051592	GO:0051592	response to calcium ion	10/350	104/12280	0.000753994	0.0334773	0.0295447	SYT7/SYT1/P2RX7/TNNT2/SLC25A23/KCNMB4/DMTN/ADCY1/CPNE4/TXNIP	10
GO:0050714	GO:0050714	positive regulation of protein secretion	13/350	163/12280	0.000787546	0.0341269	0.0301179	NNAT/ACHE/P2RX7/TNFSF4/GPR68/SOX4/PTPN22/HTR2B/TSLP/BMP6/OR51E2/TLR1/CADM1	13
GO:0097485	GO:0097485	neuron projection guidance	15/350	205/12280	0.000787839	0.0341269	0.0301179	NRXN3/CYFIP2/NTN1/CRMP1/SEMA6A/EGR2/EPHA7/PLXNC1/TUBB2B/SEMA6D/GDF7/SEMA3D/DRGX/SPTBN2/NOG	15
GO:0032787	GO:0032787	monocarboxylic acid metabolic process	24/350	415/12280	0.000816332	0.0349351	0.0308311	CYP26B1/PDK4/DCN/MSMO1/P2RX7/SCD/PLA2G3/PNPLA3/PLA2G4C/ALDOC/ACAT2/FABP3/ALDH1A2/ACSS2/LPIN1/FADS2/CYP1B1/IDH1/FADS1/STARD4/LIPC/FASN/ELOVL6/INSIG1	24
GO:0008654	GO:0008654	phospholipid biosynthetic process	16/350	228/12280	0.000836111	0.0353555	0.0312022	IDI1/ACHE/PNPLA3/FGF9/MVK/HMGCS1/FABP3/LPIN1/HTR2B/IDH1/FADS1/FGF18/FGF17/FDPS/MVD/PCYT2	16
GO:0009306	GO:0009306	protein secretion	22/350	368/12280	0.000868758	0.0363038	0.0320391	CX3CL1/SYT7/NNAT/ACHE/P2RX7/HMGCR/TNFSF4/GPR68/SOX4/PTPN22/HTR2B/TSLP/BMP6/PTPRN2/TIAM1/KCNB1/DMTN/OR51E2/ADCY5/TLR1/CADM1/ADRA2C	22
GO:0009395	GO:0009395	phospholipid catabolic process	5/350	27/12280	0.000879773	0.0363367	0.0320681	LIPG/PLA2G4C/LDLR/IDH1/LIPC	5
GO:0046470	GO:0046470	phosphatidylcholine metabolic process	7/350	55/12280	0.00089993	0.0364716	0.0321872	ACHE/PLA2G3/PLA2G4C/FABP3/LDLR/LPIN1/LIPC	7
GO:1903532	GO:1903532	positive regulation of secretion by cell	17/350	252/12280	0.000903576	0.0364716	0.0321872	SYT7/NNAT/SYT1/ACHE/P2RX7/UNC13D/TNFSF4/GPR68/SOX4/PTPN22/HTR2B/TSLP/BMP6/KCNB1/OR51E2/TLR1/CADM1	17
GO:0048167	GO:0048167	regulation of synaptic plasticity	11/350	126/12280	0.000940127	0.0375206	0.0331129	CX3CL1/SYT7/CAMK2B/FGF14/EGR2/SERPINE2/GRIA1/KCNB1/NSG1/CALB2/MAPT	11
GO:0055088	GO:0055088	lipid homeostasis	9/350	89/12280	0.000956918	0.0377664	0.0333298	PNPLA3/LIPG/TMEM97/FABP3/LDLR/LIPC/PCSK9/INSIG1/SREBF2	9
GO:0043062	GO:0043062	extracellular structure organization	19/350	300/12280	0.000984659	0.0380529	0.0335827	DCN/CCDC80/LIPG/ITGB8/ECM2/ITGA11/CYP1B1/LUM/ABI3BP/PDPN/VCAM1/PTX3/KLKB1/LIPC/OLFML2A/SULF2/COL4A6/COL15A1/VIT	19
GO:0061564	GO:0061564	axon development	23/350	396/12280	0.000985604	0.0380529	0.0335827	NRXN3/RTN4R/CYFIP2/NTN1/TRPC5/CRMP1/PAK3/SEMA6A/EGR2/EPHA7/PLXNC1/KLF4/TUBB2B/SEMA6D/GDF7/SEMA3D/TIAM1/ADCY1/DRGX/SPTBN2/NOG/SLITRK6/MAPT	23
GO:0055082	GO:0055082	cellular chemical homeostasis	27/350	497/12280	0.00100989	0.0385715	0.0340404	CX3CL1/LTF/ATP1A2/ATP2B3/TRPC5/P2RX7/TRPA1/C7/HMGCR/GPR68/KCNJ2/SOX4/SLC25A23/ACKR4/HTR2B/ANK2/FOXO1/BMP6/PTPRN2/GRIA1/TIAM1/KCNB1/SLC9B1/F2RL2/CALB2/ADCY5/SLC9A9	27
GO:0070268	GO:0070268	cornification	5/350	28/12280	0.0010463	0.0394352	0.0348026	CYP26B1/PPL/KRT34/KRT33B/KRT19	5
GO:0010769	GO:0010769	regulation of cell morphogenesis involved in differentiation	17/350	256/12280	0.00107492	0.0394352	0.0348026	RTN4R/CAMK2B/NTN1/TRPC5/PAK3/SEMA6A/UNC13D/EPHA7/PLXNC1/TUBB2B/SEMA6D/SEMA3D/TIAM1/LRP8/DMTN/PDPN/MAPT	17
GO:0050921	GO:0050921	positive regulation of chemotaxis	9/350	91/12280	0.00112274	0.0394352	0.0348026	RARRES2/TUBB2B/MSTN/TIAM1/FGF18/CXCL8/PDGFD/IL16/CAMK1D	9
GO:0015837	GO:0015837	amine transport	6/350	42/12280	0.00113201	0.0394352	0.0348026	SYT7/ATP1A2/SYT1/P2RX7/KCNB1/ADRA2C	6
GO:0051952	GO:0051952	regulation of amine transport	6/350	42/12280	0.00113201	0.0394352	0.0348026	SYT7/ATP1A2/SYT1/P2RX7/KCNB1/ADRA2C	6
GO:0006813	GO:0006813	potassium ion transport	11/350	129/12280	0.00114141	0.0394352	0.0348026	ATP1A2/KLHL24/KCNJ5/KCNJ2/KCNMB4/ANK2/KCNJ6/KCNB1/KCNT2/KCNA3/SLC9A9	11
GO:0001774	GO:0001774	microglial cell activation	4/350	17/12280	0.00115014	0.0394352	0.0348026	CX3CL1/CLU/LDLR/MAPT	4
GO:0002269	GO:0002269	leukocyte activation involved in inflammatory response	4/350	17/12280	0.00115014	0.0394352	0.0348026	CX3CL1/CLU/LDLR/MAPT	4
GO:0050974	GO:0050974	detection of mechanical stimulus involved in sensory perception	4/350	17/12280	0.00115014	0.0394352	0.0348026	TRPA1/SERPINE2/PIEZO2/ASIC3	4
GO:0033865	GO:0033865	nucleoside bisphosphate metabolic process	10/350	110/12280	0.00116574	0.0394352	0.0348026	PDK4/SCD/MVK/HMGCS1/HMGCR/ACSS2/MVD/FASN/ELOVL6/SULT1C4	10
GO:0033875	GO:0033875	ribonucleoside bisphosphate metabolic process	10/350	110/12280	0.00116574	0.0394352	0.0348026	PDK4/SCD/MVK/HMGCS1/HMGCR/ACSS2/MVD/FASN/ELOVL6/SULT1C4	10
GO:0034032	GO:0034032	purine nucleoside bisphosphate metabolic process	10/350	110/12280	0.00116574	0.0394352	0.0348026	PDK4/SCD/MVK/HMGCS1/HMGCR/ACSS2/MVD/FASN/ELOVL6/SULT1C4	10
GO:0051962	GO:0051962	positive regulation of nervous system development	23/350	402/12280	0.00120402	0.0403459	0.0356064	SOX8/CX3CL1/CAMK2B/NTN1/SYT1/TRPC5/PAK3/SEMA6A/PLPPR5/GDF5/SERPINE2/PLXNC1/TUBB2B/GDF7/TENM4/BMP6/TIAM1/GDF6/LRP8/CAMK1D/ADRA2C/SLITRK6/MAPT	23
GO:0001649	GO:0001649	osteoblast differentiation	13/350	172/12280	0.00129346	0.0425405	0.0375432	SOX8/LTF/ACHE/PTHLH/CHRD/FGF9/ITGA11/RSPO2/BMP6/ALPL/FASN/NOG/GDF10	13
GO:0009266	GO:0009266	response to temperature stimulus	13/350	172/12280	0.00129346	0.0425405	0.0375432	PCSK1N/HSF4/TRPA1/MMP24/HTR2B/MSTN/FOXO1/TP53INP1/DRGX/HSPA6/MAPT/MICA/ASIC3	13
GO:0048667	GO:0048667	cell morphogenesis involved in neuron differentiation	25/350	456/12280	0.0013597	0.0443087	0.0391036	NRXN3/RTN4R/CYFIP2/CAMK2B/NTN1/TRPC5/CRMP1/PAK3/SEMA6A/EGR2/EPHA7/PLXNC1/TUBB2B/SEMA6D/GDF7/CDHR1/SEMA3D/TIAM1/LRP8/ADCY1/DRGX/SPTBN2/NOG/SLITRK6/MAPT	25
GO:0010770	GO:0010770	positive regulation of cell morphogenesis involved in differentiation	11/350	132/12280	0.00137694	0.0444626	0.0392394	CAMK2B/NTN1/TRPC5/PAK3/UNC13D/PLXNC1/TUBB2B/TIAM1/LRP8/DMTN/MAPT	11
GO:0015672	GO:0015672	monovalent inorganic cation transport	20/350	333/12280	0.00139633	0.0446826	0.0394337	ATP1A2/NKAIN1/P2RX7/KLHL24/KCNJ5/KCNJ2/KCNMB4/SERPINE2/SCN7A/ANK2/KCNJ6/KCNB1/SLC2A6/KCNT2/SLC9B1/PCSK9/KCNA3/SLC9A9/NDUFA4L2/ASIC3	20
GO:0002793	GO:0002793	positive regulation of peptide secretion	13/350	174/12280	0.00143659	0.0450484	0.0397564	NNAT/ACHE/P2RX7/TNFSF4/GPR68/SOX4/PTPN22/HTR2B/TSLP/BMP6/OR51E2/TLR1/CADM1	13
GO:0006631	GO:0006631	fatty acid metabolic process	17/350	263/12280	0.00144142	0.0450484	0.0397564	PDK4/MSMO1/SCD/PLA2G3/PNPLA3/PLA2G4C/ACAT2/FABP3/ACSS2/LPIN1/FADS2/CYP1B1/FADS1/LIPC/FASN/ELOVL6/INSIG1	17
GO:0061003	GO:0061003	positive regulation of dendritic spine morphogenesis	4/350	18/12280	0.00144581	0.0450484	0.0397564	CAMK2B/PAK3/TIAM1/LRP8	4
GO:0072330	GO:0072330	monocarboxylic acid biosynthetic process	14/350	198/12280	0.00161863	0.0499945	0.0441215	PDK4/DCN/P2RX7/SCD/ALDOC/ALDH1A2/ACSS2/FADS2/FADS1/STARD4/LIPC/FASN/ELOVL6/INSIG1	14

## Sheet: GO_A_to_Q_down
	ID	Description	GeneRatio	BgRatio	pvalue	p.adjust	qvalue	geneID	Count
GO:0140014	GO:0140014	mitotic nuclear division	34/311	257/12280	1.72625e-15	5.83991e-12	5.24599e-12	ANLN/TACC3/TRIP13/SPAG5/TPX2/CDC6/MYBL2/CCND3/TTK/CDC20/NCAPH/ZWINT/IL1B/DLGAP5/PKMYT1/SGO1/CCNB1/CDCA8/NUSAP1/KIF23/CENPE/KIF2C/NUF2/CCNA2/CDCA5/PLK1/CDT1/BUB1/MTBP/UBE2C/HASPIN/AURKB/KIF18B/PRC1	34
GO:0000070	GO:0000070	mitotic sister chromatid segregation	25/311	145/12280	2.36129e-14	3.99412e-11	3.58791e-11	TACC3/TRIP13/SPAG5/CDC6/TTK/CDC20/NCAPH/ZWINT/DLGAP5/SGO1/CCNB1/CDCA8/NUSAP1/KIF23/CENPE/KIF2C/NUF2/CDCA5/PLK1/CDT1/BUB1/HASPIN/AURKB/KIF18B/PRC1	25
GO:0000280	GO:0000280	nuclear division	38/311	355/12280	3.798e-14	4.28288e-11	3.84731e-11	ANLN/TACC3/TRIP13/SPAG5/TPX2/CDC6/MYBL2/CCND3/TTK/CDC20/NCAPH/MND1/ZWINT/IL1B/DLGAP5/PKMYT1/SGO1/CCNB1/CDCA8/NUSAP1/KIF23/CENPE/KIF2C/NUF2/FANCD2/CCNA2/CDCA5/PLK1/CDT1/BUB1/MTBP/PDE3A/UBE2C/HASPIN/AURKB/KIF18B/FANCA/PRC1	38
GO:0000819	GO:0000819	sister chromatid segregation	26/311	170/12280	1.33987e-13	1.1332e-10	1.01795e-10	TACC3/TRIP13/SPAG5/CDC6/TTK/CDC20/NCAPH/ZWINT/DLGAP5/SGO1/CCNB1/CDCA8/NUSAP1/KIF23/CENPE/KIF2C/NUF2/CDCA5/PLK1/CDT1/BUB1/HASPIN/AURKB/KIF18B/PRC1/DDX12P	26
GO:0048285	GO:0048285	organelle fission	39/311	391/12280	1.70612e-13	1.15436e-10	1.03696e-10	ANLN/TACC3/TRIP13/SPAG5/TPX2/CDC6/MYBL2/CCND3/TTK/CDC20/NCAPH/MND1/ZWINT/IL1B/DLGAP5/PKMYT1/SGO1/CCNB1/CDCA8/NUSAP1/KIF23/CENPE/KIF2C/NUF2/FANCD2/CCNA2/MTFR2/CDCA5/PLK1/CDT1/BUB1/MTBP/PDE3A/UBE2C/HASPIN/AURKB/KIF18B/FANCA/PRC1	39
GO:0007059	GO:0007059	chromosome segregation	32/311	278/12280	6.23243e-13	3.51405e-10	3.15667e-10	TACC3/TRIP13/SPAG5/BIRC5/CDC6/FAM83D/OIP5/TTK/CDC20/NCAPH/ZWINT/DLGAP5/SGO1/CCNB1/CDCA8/NUSAP1/KIF23/CENPE/KIF2C/NUF2/FANCD2/CDCA5/SKA1/PLK1/CDT1/BUB1/HASPIN/AURKB/KIF18B/PRC1/CENPW/DDX12P	32
GO:0098813	GO:0098813	nuclear chromosome segregation	28/311	226/12280	3.11331e-12	1.50462e-09	1.3516e-09	TACC3/TRIP13/SPAG5/CDC6/FAM83D/TTK/CDC20/NCAPH/ZWINT/DLGAP5/SGO1/CCNB1/CDCA8/NUSAP1/KIF23/CENPE/KIF2C/NUF2/FANCD2/CDCA5/PLK1/CDT1/BUB1/HASPIN/AURKB/KIF18B/PRC1/DDX12P	28
GO:0044770	GO:0044770	cell cycle phase transition	42/311	494/12280	4.02627e-12	1.70261e-09	1.52945e-09	ANLN/TACC3/MCM10/CAMK2A/TRIP13/HMMR/MCM2/ORC1/TPX2/CLSPN/CDC45/CDC6/CDC7/SUSD2/MCM5/POLE2/CDKN3/E2F1/FAM83D/MCM4/CCND3/TTK/CEP72/CDC20/CDK2/DLGAP5/PKMYT1/CCNB1/CENPE/DTL/CCNA2/CDCA5/CDC25A/MCM7/PLK1/CDT1/BUB1/MTBP/ID4/UBE2C/AURKB/PRIM1	42
GO:0044772	GO:0044772	mitotic cell cycle phase transition	40/311	460/12280	6.81854e-12	2.56301e-09	2.30235e-09	ANLN/TACC3/MCM10/CAMK2A/TRIP13/HMMR/MCM2/ORC1/TPX2/CLSPN/CDC45/CDC6/CDC7/MCM5/POLE2/CDKN3/E2F1/MCM4/CCND3/TTK/CEP72/CDC20/CDK2/DLGAP5/PKMYT1/CCNB1/CENPE/DTL/CCNA2/CDCA5/CDC25A/MCM7/PLK1/CDT1/BUB1/MTBP/ID4/UBE2C/AURKB/PRIM1	40
GO:0006270	GO:0006270	DNA replication initiation	11/311	33/12280	2.71531e-10	9.18589e-08	8.25168e-08	MCM10/MCM2/ORC1/CDC45/CDC6/CDC7/MCM5/MCM4/CDK2/MCM7/CDT1	11
GO:0051783	GO:0051783	regulation of nuclear division	22/311	173/12280	4.34301e-10	1.33567e-07	1.19984e-07	ANLN/TACC3/TRIP13/CDC6/CCND3/TTK/CDC20/IL1B/DLGAP5/PKMYT1/CCNB1/NUSAP1/CENPE/CCNA2/CDCA5/PLK1/CDT1/BUB1/MTBP/PDE3A/UBE2C/AURKB	22
GO:0007088	GO:0007088	regulation of mitotic nuclear division	21/311	159/12280	5.39646e-10	1.52135e-07	1.36663e-07	ANLN/TACC3/TRIP13/CDC6/CCND3/TTK/CDC20/IL1B/DLGAP5/PKMYT1/CCNB1/NUSAP1/CENPE/CCNA2/CDCA5/PLK1/CDT1/BUB1/MTBP/UBE2C/AURKB	21
GO:0007091	GO:0007091	metaphase/anaphase transition of mitotic cell cycle	12/311	53/12280	5.93332e-09	1.40077e-06	1.25831e-06	TACC3/TRIP13/CDC6/TTK/CDC20/DLGAP5/CCNB1/CENPE/PLK1/CDT1/BUB1/AURKB	12
GO:0044784	GO:0044784	metaphase/anaphase transition of cell cycle	12/311	53/12280	5.93332e-09	1.40077e-06	1.25831e-06	TACC3/TRIP13/CDC6/TTK/CDC20/DLGAP5/CCNB1/CENPE/PLK1/CDT1/BUB1/AURKB	12
GO:0044843	GO:0044843	cell cycle G1/S phase transition	24/311	235/12280	6.21091e-09	1.40077e-06	1.25831e-06	MCM10/CAMK2A/MCM2/ORC1/CDC45/CDC6/CDC7/SUSD2/MCM5/POLE2/CDKN3/E2F1/FAM83D/MCM4/CCND3/CDK2/CCNB1/CCNA2/CDC25A/MCM7/CDT1/MTBP/ID4/PRIM1	24
GO:0010965	GO:0010965	regulation of mitotic sister chromatid separation	12/311	54/12280	7.45743e-09	1.57678e-06	1.41642e-06	TACC3/TRIP13/CDC6/TTK/CDC20/DLGAP5/CCNB1/CENPE/PLK1/CDT1/BUB1/AURKB	12
GO:0051983	GO:0051983	regulation of chromosome segregation	15/311	94/12280	1.23565e-08	2.45895e-06	2.20887e-06	TACC3/TRIP13/SPAG5/CDC6/TTK/CDC20/DLGAP5/CCNB1/CENPE/KIF2C/CDCA5/PLK1/CDT1/BUB1/AURKB	15
GO:0051306	GO:0051306	mitotic sister chromatid separation	12/311	57/12280	1.43657e-08	2.55785e-06	2.29771e-06	TACC3/TRIP13/CDC6/TTK/CDC20/DLGAP5/CCNB1/CENPE/PLK1/CDT1/BUB1/AURKB	12
GO:1905818	GO:1905818	regulation of chromosome separation	12/311	57/12280	1.43657e-08	2.55785e-06	2.29771e-06	TACC3/TRIP13/CDC6/TTK/CDC20/DLGAP5/CCNB1/CENPE/PLK1/CDT1/BUB1/AURKB	12
GO:0006261	GO:0006261	DNA-dependent DNA replication	18/311	144/12280	2.29677e-08	3.88499e-06	3.48988e-06	POLQ/MCM10/MCM2/ORC1/CDC45/CDC6/CDC7/MCM5/POLE2/MCM4/CDK2/CHTF18/GINS2/TONSL/MCM7/CDT1/GINS3/PRIM1	18
GO:1901987	GO:1901987	regulation of cell cycle phase transition	29/311	354/12280	2.47459e-08	3.98645e-06	3.58103e-06	ANLN/TRIP13/HMMR/ORC1/TPX2/CLSPN/CDC45/CDC6/CDC7/SUSD2/E2F1/FAM83D/CCND3/TTK/CEP72/CDC20/CDK2/DLGAP5/CCNB1/CENPE/DTL/CDCA5/CDC25A/PLK1/CDT1/BUB1/MTBP/UBE2C/AURKB	29
GO:0006260	GO:0006260	DNA replication	24/311	255/12280	3.07846e-08	4.73383e-06	4.2524e-06	POLQ/MCM10/MCM2/ORC1/CLSPN/CDC45/CDC6/CDC7/MCM5/POLE2/MCM4/ID3/CDK2/CHTF18/GINS2/DTL/CCNA2/CHAF1B/TONSL/MCM7/CDT1/EXO1/GINS3/PRIM1	24
GO:0030071	GO:0030071	regulation of mitotic metaphase/anaphase transition	11/311	50/12280	3.5686e-08	5.03024e-06	4.51866e-06	TRIP13/CDC6/TTK/CDC20/DLGAP5/CCNB1/CENPE/PLK1/CDT1/BUB1/AURKB	11
GO:1902099	GO:1902099	regulation of metaphase/anaphase transition of cell cycle	11/311	50/12280	3.5686e-08	5.03024e-06	4.51866e-06	TRIP13/CDC6/TTK/CDC20/DLGAP5/CCNB1/CENPE/PLK1/CDT1/BUB1/AURKB	11
GO:0033045	GO:0033045	regulation of sister chromatid segregation	13/311	75/12280	4.24313e-08	5.74181e-06	5.15786e-06	TACC3/TRIP13/CDC6/TTK/CDC20/DLGAP5/CCNB1/CENPE/CDCA5/PLK1/CDT1/BUB1/AURKB	13
GO:1901990	GO:1901990	regulation of mitotic cell cycle phase transition	27/311	326/12280	6.14189e-08	7.99155e-06	7.1788e-06	ANLN/TRIP13/HMMR/ORC1/TPX2/CLSPN/CDC45/CDC6/CDC7/E2F1/CCND3/TTK/CEP72/CDC20/CDK2/DLGAP5/CCNB1/CENPE/DTL/CDCA5/CDC25A/PLK1/CDT1/BUB1/MTBP/UBE2C/AURKB	27
GO:0033047	GO:0033047	regulation of mitotic sister chromatid segregation	12/311	65/12280	6.82377e-08	8.54993e-06	7.68039e-06	TACC3/TRIP13/CDC6/TTK/CDC20/DLGAP5/CCNB1/CENPE/PLK1/CDT1/BUB1/AURKB	12
GO:0051304	GO:0051304	chromosome separation	13/311	80/12280	9.42716e-08	1.139e-05	1.02317e-05	TACC3/TRIP13/CDC6/TTK/CDC20/NCAPH/DLGAP5/CCNB1/CENPE/PLK1/CDT1/BUB1/AURKB	13
GO:1901989	GO:1901989	positive regulation of cell cycle phase transition	13/311	81/12280	1.0977e-07	1.28053e-05	1.1503e-05	CDC45/CDC6/CDC7/FAM83D/CCND3/DLGAP5/CCNB1/DTL/CDCA5/CDC25A/CDT1/MTBP/UBE2C	13
GO:1901992	GO:1901992	positive regulation of mitotic cell cycle phase transition	12/311	69/12280	1.364e-07	1.53814e-05	1.38171e-05	CDC45/CDC6/CDC7/CCND3/DLGAP5/CCNB1/DTL/CDCA5/CDC25A/CDT1/MTBP/UBE2C	12
GO:0000082	GO:0000082	G1/S transition of mitotic cell cycle	21/311	220/12280	1.81302e-07	1.97853e-05	1.77731e-05	MCM10/CAMK2A/MCM2/ORC1/CDC45/CDC6/CDC7/MCM5/POLE2/CDKN3/E2F1/MCM4/CCND3/CDK2/CCNB1/CDC25A/MCM7/CDT1/MTBP/ID4/PRIM1	21
GO:0045931	GO:0045931	positive regulation of mitotic cell cycle	16/311	131/12280	1.94595e-07	2.05724e-05	1.84801e-05	CDC45/CDC6/CDC7/CCND3/HES1/IL1B/DLGAP5/CCNB1/NUSAP1/DTL/CDCA5/CDC25A/CDT1/MTBP/UBE2C/SPHK1	16
GO:0008608	GO:0008608	attachment of spindle microtubules to kinetochore	8/311	31/12280	7.34413e-07	7.52885e-05	6.76316e-05	SPAG5/SGO1/CCNB1/CENPE/KIF2C/NUF2/CDT1/AURKB	8
GO:0051321	GO:0051321	meiotic cell cycle	18/311	185/12280	1.05259e-06	0.000104732	9.4081e-05	TRIP13/RAD54L/TTK/CDC20/NCAPH/MND1/CDK2/PKMYT1/SGO1/NUF2/FANCD2/CDC25A/PLK1/BUB1/PDE3A/EXO1/FANCA/XRCC2	18
GO:0007094	GO:0007094	mitotic spindle assembly checkpoint	8/311	33/12280	1.23674e-06	0.000110103	9.89051e-05	TRIP13/TTK/CDC20/CCNB1/PLK1/CDT1/BUB1/AURKB	8
GO:0031577	GO:0031577	spindle checkpoint	8/311	33/12280	1.23674e-06	0.000110103	9.89051e-05	TRIP13/TTK/CDC20/CCNB1/PLK1/CDT1/BUB1/AURKB	8
GO:0071173	GO:0071173	spindle assembly checkpoint	8/311	33/12280	1.23674e-06	0.000110103	9.89051e-05	TRIP13/TTK/CDC20/CCNB1/PLK1/CDT1/BUB1/AURKB	8
GO:0071174	GO:0071174	mitotic spindle checkpoint	8/311	33/12280	1.23674e-06	0.000110103	9.89051e-05	TRIP13/TTK/CDC20/CCNB1/PLK1/CDT1/BUB1/AURKB	8
GO:0045841	GO:0045841	negative regulation of mitotic metaphase/anaphase transition	8/311	35/12280	2.00597e-06	0.000169655	0.000152401	TRIP13/TTK/CDC20/CCNB1/PLK1/CDT1/BUB1/AURKB	8
GO:1902100	GO:1902100	negative regulation of metaphase/anaphase transition of cell cycle	8/311	35/12280	2.00597e-06	0.000169655	0.000152401	TRIP13/TTK/CDC20/CCNB1/PLK1/CDT1/BUB1/AURKB	8
GO:0090068	GO:0090068	positive regulation of cell cycle process	20/311	234/12280	2.05874e-06	0.000169871	0.000152595	SPAG5/CDC45/CDC6/CDC7/E2F1/FAM83D/CCND3/CDK2/IL1B/DLGAP5/CCNB1/NUSAP1/KIF23/DTL/CDCA5/CDC25A/CDT1/MTBP/UBE2C/AURKB	20
GO:0045839	GO:0045839	negative regulation of mitotic nuclear division	9/311	47/12280	2.23086e-06	0.000179691	0.000161416	TRIP13/TTK/CDC20/CCNB1/PLK1/CDT1/BUB1/MTBP/AURKB	9
GO:0007051	GO:0007051	spindle organization	16/311	157/12280	2.29254e-06	0.000180364	0.000162021	TACC3/WDR62/SPAG5/TPX2/MYBL2/TTK/CEP72/CDC20/AUNIP/CCNB1/KIF23/CENPE/NUF2/PLK1/AURKB/PRC1	16
GO:1905819	GO:1905819	negative regulation of chromosome separation	8/311	36/12280	2.52284e-06	0.000189661	0.000170373	TRIP13/TTK/CDC20/CCNB1/PLK1/CDT1/BUB1/AURKB	8
GO:2000816	GO:2000816	negative regulation of mitotic sister chromatid separation	8/311	36/12280	2.52284e-06	0.000189661	0.000170373	TRIP13/TTK/CDC20/CCNB1/PLK1/CDT1/BUB1/AURKB	8
GO:0007052	GO:0007052	mitotic spindle organization	13/311	106/12280	2.63764e-06	0.000193981	0.000174253	TACC3/WDR62/TPX2/MYBL2/TTK/CDC20/CCNB1/KIF23/CENPE/NUF2/PLK1/AURKB/PRC1	13
GO:1902850	GO:1902850	microtubule cytoskeleton organization involved in mitosis	14/311	125/12280	3.25618e-06	0.000234376	0.00021054	TACC3/WDR62/TPX2/MYBL2/TTK/CDC20/CCNB1/NUSAP1/KIF23/CENPE/NUF2/PLK1/AURKB/PRC1	14
GO:0051784	GO:0051784	negative regulation of nuclear division	9/311	51/12280	4.55669e-06	0.000321151	0.00028849	TRIP13/TTK/CDC20/CCNB1/PLK1/CDT1/BUB1/MTBP/AURKB	9
GO:0033048	GO:0033048	negative regulation of mitotic sister chromatid segregation	8/311	39/12280	4.80103e-06	0.000331467	0.000297757	TRIP13/TTK/CDC20/CCNB1/PLK1/CDT1/BUB1/AURKB	8
GO:0051303	GO:0051303	establishment of chromosome localization	10/311	67/12280	6.48462e-06	0.000438749	0.000394128	SPAG5/FAM83D/DLGAP5/CCNB1/CDCA8/CENPE/KIF2C/NUF2/CDCA5/CDT1	10
GO:0033046	GO:0033046	negative regulation of sister chromatid segregation	8/311	41/12280	7.13473e-06	0.000457035	0.000410554	TRIP13/TTK/CDC20/CCNB1/PLK1/CDT1/BUB1/AURKB	8
GO:0051985	GO:0051985	negative regulation of chromosome segregation	8/311	41/12280	7.13473e-06	0.000457035	0.000410554	TRIP13/TTK/CDC20/CCNB1/PLK1/CDT1/BUB1/AURKB	8
GO:0045787	GO:0045787	positive regulation of cell cycle	23/311	321/12280	7.16017e-06	0.000457035	0.000410554	SPAG5/CDC45/CDC6/CDC7/E2F1/FAM83D/CCND3/HES1/CDK2/IL1B/DLGAP5/CCNB1/NUSAP1/KIF23/DTL/CCNA2/CDCA5/CDC25A/CDT1/MTBP/UBE2C/SPHK1/AURKB	23
GO:0050000	GO:0050000	chromosome localization	10/311	68/12280	7.43442e-06	0.000465752	0.000418385	SPAG5/FAM83D/DLGAP5/CCNB1/CDCA8/CENPE/KIF2C/NUF2/CDCA5/CDT1	10
GO:0043062	GO:0043062	extracellular structure organization	22/311	300/12280	7.87182e-06	0.000484189	0.000434946	ITGA2B/VCAN/ELN/LAMA3/ITGA8/COL5A3/COL4A4/CRISPLD2/ITGA4/MYH11/ADAM19/ITGA9/MMP3/ABCG1/FGFR4/ABCA1/MMP10/GREM1/COL4A3/HAS2/MMP1/ITGB3	22
GO:0051310	GO:0051310	metaphase plate congression	9/311	55/12280	8.71326e-06	0.000526374	0.000472842	SPAG5/FAM83D/CCNB1/CDCA8/CENPE/KIF2C/NUF2/CDCA5/CDT1	9
GO:1903046	GO:1903046	meiotic cell cycle process	14/311	140/12280	1.23044e-05	0.000730279	0.000656009	TRIP13/TTK/CDC20/NCAPH/MND1/SGO1/NUF2/FANCD2/CDC25A/PLK1/BUB1/PDE3A/EXO1/FANCA	14
GO:0030198	GO:0030198	extracellular matrix organization	20/311	268/12280	1.58818e-05	0.000926347	0.000832137	ITGA2B/VCAN/ELN/LAMA3/ITGA8/COL5A3/COL4A4/CRISPLD2/ITGA4/MYH11/ADAM19/ITGA9/MMP3/FGFR4/MMP10/GREM1/COL4A3/HAS2/MMP1/ITGB3	20
GO:0000075	GO:0000075	cell cycle checkpoint	17/311	207/12280	2.04511e-05	0.00117265	0.00105339	TRIP13/ORC1/WDR76/CLSPN/CDC45/CDC6/E2F1/TTK/CDC20/ZWINT/CDK2/CCNB1/DTL/PLK1/CDT1/BUB1/AURKB	17
GO:0000076	GO:0000076	DNA replication checkpoint	5/311	15/12280	2.45891e-05	0.00138641	0.00124541	ORC1/CLSPN/CDC45/CDC6/CDT1	5
GO:0007093	GO:0007093	mitotic cell cycle checkpoint	14/311	158/12280	4.81117e-05	0.00265167	0.002382	TRIP13/ORC1/CLSPN/CDC6/E2F1/TTK/CDC20/ZWINT/CDK2/CCNB1/PLK1/CDT1/BUB1/AURKB	14
GO:0034501	GO:0034501	protein localization to kinetochore	5/311	17/12280	4.8597e-05	0.00265167	0.002382	TTK/CDT1/MTBP/HASPIN/AURKB	5
GO:1901988	GO:1901988	negative regulation of cell cycle phase transition	15/311	179/12280	4.97219e-05	0.00266999	0.00239845	TRIP13/ORC1/CLSPN/CDC6/SUSD2/E2F1/TTK/CDC20/CDK2/CCNB1/DTL/PLK1/CDT1/BUB1/AURKB	15
GO:0010389	GO:0010389	regulation of G2/M transition of mitotic cell cycle	13/311	144/12280	7.37497e-05	0.00389836	0.0035019	HMMR/ORC1/TPX2/CLSPN/CDC6/CDC7/CEP72/CDK2/CCNB1/DTL/CDC25A/PLK1/AURKB	13
GO:0140013	GO:0140013	meiotic nuclear division	12/311	126/12280	8.31143e-05	0.00432578	0.00388584	TRIP13/TTK/CDC20/NCAPH/MND1/SGO1/NUF2/FANCD2/PLK1/BUB1/PDE3A/FANCA	12
GO:0007080	GO:0007080	mitotic metaphase plate congression	7/311	43/12280	9.19474e-05	0.00467111	0.00419605	CCNB1/CDCA8/CENPE/KIF2C/NUF2/CDCA5/CDT1	7
GO:0000086	GO:0000086	G2/M transition of mitotic cell cycle	15/311	189/12280	9.25108e-05	0.00467111	0.00419605	HMMR/ORC1/TPX2/CLSPN/CDC6/CDC7/CEP72/CDK2/PKMYT1/CCNB1/DTL/CCNA2/CDC25A/PLK1/AURKB	15
GO:0071103	GO:0071103	DNA conformation change	16/311	215/12280	0.000116312	0.00578654	0.00519804	MCM2/RAD54L/CDC45/CENPM/OIP5/MCM4/HELLS/NCAPH/GINS2/CCNB1/NUSAP1/CDCA5/CHAF1B/MCM7/CENPW/DDX12P	16
GO:0000079	GO:0000079	regulation of cyclin-dependent protein serine/threonine kinase activity	9/311	79/12280	0.000165691	0.00812367	0.00729749	CDC6/CDKN3/CCND3/PKMYT1/CCNB1/MYOCD/CCNA2/CDC25A/PLK1	9
GO:0071459	GO:0071459	protein localization to chromosome, centromeric region	5/311	22/12280	0.000186358	0.00898325	0.00806965	TTK/CDT1/MTBP/HASPIN/AURKB	5
GO:0032835	GO:0032835	glomerulus development	7/311	48/12280	0.000188534	0.00898325	0.00806965	NOTCH3/COL4A4/HES1/TCF21/HEYL/SERPINB7/COL4A3	7
GO:1904029	GO:1904029	regulation of cyclin-dependent protein kinase activity	9/311	82/12280	0.000220793	0.0103742	0.00931913	CDC6/CDKN3/CCND3/PKMYT1/CCNB1/MYOCD/CCNA2/CDC25A/PLK1	9
GO:1902749	GO:1902749	regulation of cell cycle G2/M phase transition	13/311	161/12280	0.000227679	0.0105512	0.00947816	HMMR/ORC1/TPX2/CLSPN/CDC6/CDC7/CEP72/CDK2/CCNB1/DTL/CDC25A/PLK1/AURKB	13
GO:0051315	GO:0051315	attachment of mitotic spindle microtubules to kinetochore	4/311	13/12280	0.000240778	0.0110075	0.00988802	CENPE/KIF2C/NUF2/CDT1	4
GO:0045132	GO:0045132	meiotic chromosome segregation	8/311	66/12280	0.00024772	0.0110457	0.00992239	TRIP13/TTK/NCAPH/SGO1/NUF2/FANCD2/PLK1/BUB1	8
GO:0006937	GO:0006937	regulation of muscle contraction	10/311	102/12280	0.000255086	0.0110457	0.00992239	MYLK2/TNNT1/PDE4D/TACR1/MYOCD/CASQ1/KCNE3/SPHK1/SSTR2/MIR145	10
GO:0072006	GO:0072006	nephron development	10/311	102/12280	0.000255086	0.0110457	0.00992239	NOTCH3/COL4A4/HES1/TCF21/PGF/WNK4/HEYL/SERPINB7/GREM1/COL4A3	10
GO:0016572	GO:0016572	histone phosphorylation	6/311	36/12280	0.000257941	0.0110457	0.00992239	CDK2/IL1B/CCNB1/CCNA2/HASPIN/AURKB	6
GO:0031145	GO:0031145	anaphase-promoting complex-dependent catabolic process	6/311	36/12280	0.000257941	0.0110457	0.00992239	CDC20/CDK2/CCNB1/PLK1/UBE2C/AURKB	6
GO:0044839	GO:0044839	cell cycle G2/M phase transition	15/311	208/12280	0.000266706	0.0112783	0.0101313	HMMR/ORC1/TPX2/CLSPN/CDC6/CDC7/CEP72/CDK2/PKMYT1/CCNB1/DTL/CCNA2/CDC25A/PLK1/AURKB	15
GO:1901991	GO:1901991	negative regulation of mitotic cell cycle phase transition	13/311	164/12280	0.000273037	0.0114035	0.0102438	TRIP13/ORC1/CLSPN/CDC6/E2F1/TTK/CDC20/CDK2/CCNB1/PLK1/CDT1/BUB1/AURKB	13
GO:0007062	GO:0007062	sister chromatid cohesion	7/311	51/12280	0.000277833	0.0114623	0.0102966	CDC20/SGO1/CDCA5/PLK1/BUB1/HASPIN/DDX12P	7
GO:0010948	GO:0010948	negative regulation of cell cycle process	17/311	257/12280	0.000295899	0.0120605	0.010834	TRIP13/ORC1/CLSPN/CDC6/CDC7/SUSD2/E2F1/TTK/CDC20/CDK2/CCNB1/DTL/PLK1/CDT1/BUB1/MTBP/AURKB	17
GO:0006939	GO:0006939	smooth muscle contraction	8/311	68/12280	0.00030517	0.0122341	0.0109899	PDE4D/TACR1/MYH11/EDNRB/MYOCD/SPHK1/SSTR2/MIR145	8
GO:0070661	GO:0070661	leukocyte proliferation	13/311	166/12280	0.000307389	0.0122341	0.0109899	GAL/IL7/VSIR/CCND3/NPR3/HES1/HELLS/IL1B/TNFRSF21/GREM1/LGALS9/CTPS1/HLA-DMB	13
GO:0000083	GO:0000083	regulation of transcription involved in G1/S transition of mitotic cell cycle	5/311	27/12280	0.00051496	0.0202571	0.0181969	ORC1/CDC45/CDC6/E2F1/CDT1	5
GO:0033044	GO:0033044	regulation of chromosome organization	18/311	295/12280	0.000524314	0.020388	0.0183145	TACC3/TRIP13/MCM2/CDC45/CDC6/TTK/CDC20/IL1B/DLGAP5/CCNB1/CENPE/MYOCD/CDCA5/ATAD2/PLK1/CDT1/BUB1/AURKB	18
GO:0030239	GO:0030239	myofibril assembly	6/311	41/12280	0.000535448	0.0205843	0.0184909	TNNT1/MYH11/MYPN/CASQ1/ANKRD1/ACTC1	6
GO:0045840	GO:0045840	positive regulation of mitotic nuclear division	6/311	42/12280	0.000611578	0.0232468	0.0208826	IL1B/DLGAP5/NUSAP1/CDCA5/CDT1/UBE2C	6
GO:0072001	GO:0072001	renal system development	15/311	227/12280	0.000672387	0.0252743	0.0227039	NOTCH3/ITGA8/COL4A4/HES1/ID3/TCF21/PGF/WNK4/CEP55/MYOCD/HEYL/SERPINB7/GREM1/COL4A3/HAS2	15
GO:0001655	GO:0001655	urogenital system development	16/311	252/12280	0.000693377	0.0257769	0.0231554	NOTCH3/ITGA8/COL4A4/HES1/ID3/TCF21/PGF/WNK4/CEP55/MYOCD/HEYL/SERPINB7/GREM1/COL4A3/HAS2/ID4	16
GO:0003012	GO:0003012	muscle system process	18/311	304/12280	0.000745389	0.0274092	0.0246217	MYH13/CYBA/HMOX1/MYLK2/TNNT1/PDE4D/TACR1/IL1B/MYH11/EDNRB/MYOCD/CASQ1/STAC/ACTC1/KCNE3/SPHK1/SSTR2/MIR145	18
GO:0007186	GO:0007186	G protein-coupled receptor signaling pathway	24/311	467/12280	0.00080908	0.0294314	0.0264382	GAL/CAMK2A/AREG/ADGRG6/NPR3/PDE4D/TACR1/EDNRB/GABBR2/RGS18/ABCA1/GNG4/KISS1/PDE7B/PDE3A/SPHK1/GPR150/SSTR2/CCL13/PTGDR2/GPR19/AKR1C3/TGM2/MIR145	24
GO:0006936	GO:0006936	muscle contraction	15/311	232/12280	0.0008412	0.0302743	0.0271954	MYH13/MYLK2/TNNT1/PDE4D/TACR1/MYH11/EDNRB/MYOCD/CASQ1/STAC/ACTC1/KCNE3/SPHK1/SSTR2/MIR145	15
GO:0045066	GO:0045066	regulatory T cell differentiation	4/311	18/12280	0.000932268	0.032514	0.0292074	VSIR/FANCD2/LGALS9/FANCA	4
GO:0045589	GO:0045589	regulation of regulatory T cell differentiation	4/311	18/12280	0.000932268	0.032514	0.0292074	VSIR/FANCD2/LGALS9/FANCA	4
GO:1904385	GO:1904385	cellular response to angiotensin	4/311	18/12280	0.000932268	0.032514	0.0292074	CYBA/CAMK2A/CDC6/MIR145	4
GO:0051302	GO:0051302	regulation of cell division	10/311	122/12280	0.00105879	0.03655	0.0328328	CDC6/SUSD2/PGF/IL1B/KIF23/PLK1/AURKB/KIF18B/PRC1/MIR145	10
GO:0045930	GO:0045930	negative regulation of mitotic cell cycle	15/311	238/12280	0.00109	0.0372472	0.0334591	TRIP13/ORC1/CLSPN/CDC6/E2F1/TTK/CDC20/ZWINT/CDK2/CCNB1/PLK1/CDT1/BUB1/MTBP/AURKB	15
GO:2001251	GO:2001251	negative regulation of chromosome organization	10/311	123/12280	0.00112725	0.0381348	0.0342564	TRIP13/MCM2/TTK/CDC20/CCNB1/ATAD2/PLK1/CDT1/BUB1/AURKB	10
GO:0072012	GO:0072012	glomerulus vasculature development	4/311	19/12280	0.00115752	0.0384525	0.0345418	NOTCH3/HES1/TCF21/SERPINB7	4
GO:0050673	GO:0050673	epithelial cell proliferation	17/311	290/12280	0.00115937	0.0384525	0.0345418	CYBA/HMOX1/AREG/HES1/ITGA4/RPS6KA1/PGF/NR4A1/ID1/DLL4/EHF/EDNRB/KRT4/HAS2/GPX1/ITGB3/EPPK1	17
GO:0051101	GO:0051101	regulation of DNA binding	9/311	103/12280	0.00119045	0.0391001	0.0351236	HMOX1/E2F1/HES1/ID3/ID1/MYOCD/CDCA5/CDT1/ID4	9
GO:0042692	GO:0042692	muscle cell differentiation	16/311	267/12280	0.00127951	0.041621	0.0373882	ITGA8/TNNT1/OLFM2/HES1/MYH11/CCNB1/EDNRB/MYPN/MYOCD/CASQ1/ANKRD1/ACTC1/GREM1/GPX1/FER1L5/MIR145	16
GO:0000226	GO:0000226	microtubule cytoskeleton organization	23/311	456/12280	0.00132785	0.042782	0.0384311	TACC3/WDR62/SPAG5/TPX2/MYBL2/TTK/CEP72/CDC20/CDK2/AUNIP/SGO1/CCNB1/NUSAP1/KIF23/CENPE/KIF2C/NUF2/SKA1/PLK1/AURKB/KIF18B/XRCC2/PRC1	23
GO:0051785	GO:0051785	positive regulation of nuclear division	6/311	49/12280	0.00140574	0.0440193	0.0395425	IL1B/DLGAP5/NUSAP1/CDCA5/CDT1/UBE2C	6
GO:0040020	GO:0040020	regulation of meiotic nuclear division	4/311	20/12280	0.0014183	0.0440193	0.0395425	TRIP13/TTK/CDC20/PDE3A	4
GO:0051383	GO:0051383	kinetochore organization	4/311	20/12280	0.0014183	0.0440193	0.0395425	CENPE/NUF2/CDT1/CENPW	4
GO:1990776	GO:1990776	response to angiotensin	4/311	20/12280	0.0014183	0.0440193	0.0395425	CYBA/CAMK2A/CDC6/MIR145	4
GO:0048844	GO:0048844	artery morphogenesis	6/311	50/12280	0.00156403	0.0481011	0.0432092	PRDM1/NOTCH3/HES1/DLL4/MYOCD/MIR145	6
GO:0048514	GO:0048514	blood vessel morphogenesis	23/311	464/12280	0.00166583	0.048417	0.0434929	PRDM1/TIE1/NOTCH3/COL4A4/HMOX1/HES1/TCF21/PGF/NR4A1/IL1B/ID1/DLL4/ENPP2/MYOCD/RSPO3/FGFR4/GREM1/COL4A3/HAS2/SPHK1/GPX1/ITGB3/MIR145	23
GO:0030855	GO:0030855	epithelial cell differentiation	21/311	408/12280	0.00166815	0.048417	0.0434929	USH2A/PRDM1/COL4A4/KRT18/PDE4D/HES1/UPK1B/NR5A2/ID3/TCF21/IL1B/ID1/ENAM/EHF/PITX2/GREM1/KRT4/LCE2A/AKR1C3/KRT81/GPX1	21
GO:0000022	GO:0000022	mitotic spindle elongation	3/311	10/12280	0.00169138	0.048417	0.0434929	KIF23/AURKB/PRC1	3
GO:0006268	GO:0006268	DNA unwinding involved in DNA replication	3/311	10/12280	0.00169138	0.048417	0.0434929	MCM2/MCM4/MCM7	3
GO:0007194	GO:0007194	negative regulation of adenylate cyclase activity	3/311	10/12280	0.00169138	0.048417	0.0434929	NPR3/EDNRB/GABBR2	3
GO:0010745	GO:0010745	negative regulation of macrophage derived foam cell differentiation	3/311	10/12280	0.00169138	0.048417	0.0434929	ABCG1/ABCA1/ITGB3	3
GO:0033006	GO:0033006	regulation of mast cell activation involved in immune response	4/311	21/12280	0.00171742	0.048417	0.0434929	STXBP2/HMOX1/IL13RA2/LGALS9	4
GO:0043304	GO:0043304	regulation of mast cell degranulation	4/311	21/12280	0.00171742	0.048417	0.0434929	STXBP2/HMOX1/IL13RA2/LGALS9	4
GO:0061437	GO:0061437	renal system vasculature development	4/311	21/12280	0.00171742	0.048417	0.0434929	NOTCH3/HES1/TCF21/SERPINB7	4
GO:0061440	GO:0061440	kidney vasculature development	4/311	21/12280	0.00171742	0.048417	0.0434929	NOTCH3/HES1/TCF21/SERPINB7	4
GO:0051445	GO:0051445	regulation of meiotic cell cycle	5/311	35/12280	0.00175497	0.0490665	0.0440764	TRIP13/TTK/CDC20/CDC25A/PDE3A	5

## Sheet: GO_Q_to_6h_up
	ID	Description	GeneRatio	BgRatio	pvalue	p.adjust	qvalue	geneID	Count
GO:0010469	GO:0010469	regulation of signaling receptor activity	74/1060	289/12280	3.60502e-18	1.74123e-14	1.36232e-14	CRLF1/IGF1/GAL/CACNG4/EDN1/CXCL2/PTHLH/IL11/PDGFB/TIMP1/TGFB1/SERPINE1/CXCL12/DKK1/CSF3/CCL7/AREG/VEGFA/HBEGF/FGF1/CBLB/CCL20/ERRFI1/FASLG/PGF/INHBA/CXCL6/EREG/IL1B/BMP2/LIF/VGF/DLG4/NGF/IL6/IL33/FGF5/FGF2/UCN2/VEGFC/BMP6/FGF18/NRG1/STC1/IL24/TGFA/NPPC/ADORA1/CXCL3/CXCL5/HEYL/PRKCD/CSF2/SHH/OSGIN2/NETO1/GREM1/GDNF/IL12A/ADRB2/CXCL8/KCNK3/CLCF1/METRNL/GREM2/TNFSF15/JAG2/IFNE/WNT7B/OSTN/CGB7/PDGFA/…	74
GO:0048514	GO:0048514	blood vessel morphogenesis	89/1060	464/12280	2.77019e-13	6.69002e-10	5.23421e-10	TNFRSF12A/SH2D2A/BAK1/PRDM1/TIE1/JMJD6/PTGS2/EDN1/NRCAM/ANGPT2/HMOX1/HIF1A/SMAD7/FLT1/TGFB1/PIK3CG/SERPINE1/ELK3/ADTRP/VEGFA/FGF1/HES1/FASLG/TNFAIP3/PGF/TBX2/NR4A1/AGO2/EREG/IL1B/ID1/KLF2/ARHGAP22/DLL4/SAT1/ETS1/CEMIP2/SPRY2/IL6/STRA6/ARHGAP24/FGF2/MYOCD/EPHA2/RHOB/RSPO3/ADAM12/HMGA2/VEGFC/EPHB1/FGF18/MMP14/MYO1E/XDH/RUNX1/HK2/ITGA5/FMNL3/ESM1/HEY1/SHH/E2F7/ANPEP/GREM1/ANGPTL4/GBX2/MINAR1/CXCL8/C…	89
GO:0050731	GO:0050731	positive regulation of peptidyl-tyrosine phosphorylation	37/1060	130/12280	3.65974e-11	5.89218e-08	4.60999e-08	CRLF1/IGF1/CNTN1/FGFR3/NOX4/ICAM1/IL11/PDGFB/EHD4/TGFB1/CSF3/AREG/VEGFA/HBEGF/HES1/EREG/LIF/DLG4/IL6/PTPRJ/NRG1/ITGA5/IL24/TGFA/ADORA1/CSF2/GREM1/IL12A/CSPG4/CLCF1/CSF1R/SOCS3/TNFRSF18/HES5/MIR221/ITGB3/CD24	37
GO:0002521	GO:0002521	leukocyte differentiation	66/1060	331/12280	6.65015e-11	8.03006e-08	6.28264e-08	RUNX3/POU2F2/BAK1/PRDM1/CBFB/FSTL3/JMJD6/GLI2/IL4R/TCF7/IL11/NFATC2/SMAD7/LYL1/TGFB1/CSF3/CD83/VNN1/VEGFA/ITGA4/IL1RL2/GPR68/INHBA/LIF/DLL4/TSPAN2/PTPN22/DOCK2/DOCK10/IL6/LRRC8A/EPHA2/NFKBIZ/PIK3R1/PTPRJ/UBASH3B/SH3RF1/PLCL2/KLF10/PPARGC1B/MMP14/RUNX1/NLRP3/CSF2/SHH/DCSTAMP/IL12A/GPR183/JUNB/CHD7/ESRRA/TRIB1/NRROS/CLCF1/FZD8/GATA2/EGR3/CSF1R/JAG2/IFNE/EVI2B/TNFRSF18/SIGLEC15/CARD11/PNP/MIR17HG	66
GO:0030855	GO:0030855	epithelial cell differentiation	75/1060	408/12280	1.84236e-10	1.77972e-07	1.39244e-07	SOX8/PRKCH/SLC4A7/USH2A/PRDM1/CBFB/PKP1/ICAM1/EZR/DSP/PDGFB/HIF1A/FNDC3A/ERCC2/TGFB1/SIPA1L3/SERPINE1/PITX3/CYP27B1/VEGFA/HES1/ERRFI1/NR5A2/ID3/EREG/SOX9/IL1B/BMP2/ID1/RAP1B/KLF2/LIF/PODXL/KRT33B/ENAM/ARNTL/TBX3/EHF/FLNB/SKIL/TMOD1/EPHA2/MSN/BMP6/NRG1/MYO1E/XDH/F11R/STC1/RUNX1/ITGA2/CASP3/HEY1/CLDN3/E2F7/GREM1/GDNF/ATOH8/CDH2/MTSS1/KRT15/GPR4/JAG2/KRT79/AKR1C1/LCE2A/LCE2C/WNT7B/KRTAP1-1/HES5/KRT8…	75
GO:0006935	GO:0006935	chemotaxis	76/1060	419/12280	2.65214e-10	2.13497e-07	1.67038e-07	PLAUR/NRXN3/CRMP1/GLI2/PLXNA2/RAP1GAP/EDN1/CXCL2/NRCAM/ANGPT2/EZR/SERPIND1/PDGFB/DOK5/FLT1/TGFB1/PIK3CG/SERPINE1/CXCL12/CCL7/VEGFA/HBEGF/FGF1/CCL20/NR4A3/PGF/DUSP1/NR4A1/CXCL6/IL1B/VASP/DOCK2/IL6/SEMA6D/SPTBN5/MYPN/SEMA7A/FGF2/BMPR1B/EPHA2/ITGA9/PIK3R1/SHC3/PTPRJ/VEGFC/CXADR/EPHB1/FGF18/NRG1/ZSWIM5/DRAXIN/CXCL3/CXCL5/PRKCD/ITGA2/SHH/DRGX/RET/STX3/GREM1/GBX2/GDNF/IL12A/CXCL8/GPR183/B3GNT2/PLEKHG5/…	76
GO:0042330	GO:0042330	taxis	76/1060	421/12280	3.33604e-10	2.14411e-07	1.67753e-07	PLAUR/NRXN3/CRMP1/GLI2/PLXNA2/RAP1GAP/EDN1/CXCL2/NRCAM/ANGPT2/EZR/SERPIND1/PDGFB/DOK5/FLT1/TGFB1/PIK3CG/SERPINE1/CXCL12/CCL7/VEGFA/HBEGF/FGF1/CCL20/NR4A3/PGF/DUSP1/NR4A1/CXCL6/IL1B/VASP/DOCK2/IL6/SEMA6D/SPTBN5/MYPN/SEMA7A/FGF2/BMPR1B/EPHA2/ITGA9/PIK3R1/SHC3/PTPRJ/VEGFC/CXADR/EPHB1/FGF18/NRG1/ZSWIM5/DRAXIN/CXCL3/CXCL5/PRKCD/ITGA2/SHH/DRGX/RET/STX3/GREM1/GBX2/GDNF/IL12A/CXCL8/GPR183/B3GNT2/PLEKHG5/…	76
GO:0001525	GO:0001525	angiogenesis	73/1060	398/12280	3.60906e-10	2.14411e-07	1.67753e-07	TNFRSF12A/SH2D2A/TIE1/JMJD6/PTGS2/EDN1/NRCAM/ANGPT2/HMOX1/HIF1A/FLT1/PIK3CG/SERPINE1/ELK3/ADTRP/VEGFA/FGF1/FASLG/TNFAIP3/PGF/NR4A1/AGO2/EREG/IL1B/ID1/KLF2/ARHGAP22/DLL4/SAT1/ETS1/CEMIP2/SPRY2/IL6/ARHGAP24/FGF2/EPHA2/RHOB/RSPO3/ADAM12/HMGA2/VEGFC/EPHB1/FGF18/MMP14/RUNX1/HK2/ITGA5/FMNL3/ESM1/HEY1/SHH/E2F7/ANPEP/GREM1/ANGPTL4/GBX2/MINAR1/CXCL8/MMRN2/CSPG4/SPHK1/FOXC2/FZD8/GPR4/GATA2/EGR3/PDGFA/MIR37…	73
GO:0030155	GO:0030155	regulation of cell adhesion	84/1060	487/12280	3.99523e-10	2.14411e-07	1.67753e-07	CD9/IGF1/RUNX3/TNC/GPM6B/CBFB/FSTL3/GLI2/NUAK1/PLXNA2/IL4R/ICAM1/ITGA6/ANGPT2/FERMT1/SMAD7/TGFB1/PIK3CG/SERPINE1/CXCL12/GTPBP4/LPXN/ARHGDIB/ADTRP/CD83/VNN1/VEGFA/HES1/ITGA4/IL1RL2/NR4A3/DUSP1/CD274/SOX9/IL1B/BMP2/PODXL/PTPN22/ETS1/ADAM19/HAVCR2/IL6/TPM1/EPHA2/ABL2/NFKBIZ/MYO10/PIK3R1/DOCK5/PTPRJ/FERMT3/UBASH3B/MMP14/RUNX1/ITGA5/NLRP3/PRKCD/ITGA2/CASP3/SHH/RET/STX3/GREM1/IL12A/CXCL8/LIMS1/HAS2/MMR…	84
GO:0044057	GO:0044057	regulation of system process	67/1060	360/12280	1.04327e-09	4.65023e-07	3.6383e-07	JARID2/IGF1/TNFRSF1B/CAMK2B/ATP2B4/GAL/LMCD1/PTGS2/MGLL/CACNG4/EDN1/RIMS1/ICAM1/ITPR3/DSP/KCNK6/PDGFB/SMAD7/GRIN2D/PIK3CG/STX1A/ASIC2/SGCA/BVES/HBEGF/TACR1/ERRFI1/OPRD1/RGS4/SGK1/NR4A3/TBX2/TSHZ3/INHBA/IL1B/WNK4/CNN1/DLG4/HCN4/TPM1/MYOCD/CASQ1/REN/DOCK5/GSTO1/BMP6/CXADR/ATP2B2/STC1/NPPC/ADORA1/ITGA2/FABP5/NETO1/NKX3-1/ADRB2/KISS1/KCNK3/HSPB7/DES/SPHK1/RIMS2/GJC1/SCN5A/PDE4B/MIR17HG/SHANK3	67
GO:0018212	GO:0018212	peptidyl-tyrosine modification	57/1060	284/12280	1.05906e-09	4.65023e-07	3.6383e-07	CRLF1/IGF1/CNTN1/MAP2K3/STYK1/TIE1/FGFR3/NOX4/ICAM1/IL11/PDGFB/FLT1/EHD4/TGFB1/CSF3/AREG/VEGFA/HBEGF/PRLR/FGF1/HES1/CBLB/TTL/ERRFI1/EREG/TPST2/LIF/DLG4/IL6/FGF5/FGF2/EPHA2/ABL2/PTPRJ/EPHB1/FGF18/NRG1/ITGA5/IL24/TGFA/ADORA1/PRKCD/CSF2/RET/GREM1/IL12A/CSPG4/SH3BP5L/CLCF1/CSF1R/SOCS3/TNFRSF18/PDGFA/HES5/MIR221/ITGB3/CD24	57
GO:0050730	GO:0050730	regulation of peptidyl-tyrosine phosphorylation	42/1060	181/12280	1.97884e-09	7.96482e-07	6.2316e-07	CRLF1/IGF1/CNTN1/FGFR3/NOX4/ICAM1/IL11/PDGFB/EHD4/TGFB1/CSF3/AREG/VEGFA/HBEGF/HES1/CBLB/ERRFI1/EREG/LIF/DLG4/IL6/PTPRJ/NRG1/ITGA5/IL24/TGFA/ADORA1/PRKCD/CSF2/GREM1/IL12A/CSPG4/SH3BP5L/CLCF1/CSF1R/SOCS3/TNFRSF18/PDGFA/HES5/MIR221/ITGB3/CD24	42
GO:1901342	GO:1901342	regulation of vasculature development	51/1060	250/12280	4.54287e-09	1.63864e-06	1.28206e-06	TNFRSF12A/TIE1/PTGS2/ANGPT2/HMOX1/PDGFB/HIF1A/NFATC2/FLT1/SERPINE1/VEGFA/FGF1/FASLG/TNFAIP3/PGF/AGO2/IL1B/ID1/KLF2/DLL4/ETS1/CEMIP2/SPRY2/IL6/FGF2/MYOCD/EPHA2/RHOB/ADAM12/HMGA2/VEGFC/FGF18/XDH/RUNX1/HK2/ITGA5/HEY1/GREM1/ANGPTL4/MINAR1/CXCL8/MMRN2/SPHK1/FOXC2/GPR4/GATA2/MIR377/MIR222/MIR221/MIR138-1/MIR29A	51
GO:0008544	GO:0008544	epidermis development	45/1060	207/12280	4.74967e-09	1.63864e-06	1.28206e-06	PRKCH/SLC4A7/NSUN2/USH2A/LAMC2/COL17A1/CBFB/GAL/PKP1/PTHLH/DSP/FERMT1/ERCC2/DKK1/CYP27B1/PPARD/HES1/ERRFI1/INHBA/SNAI1/EREG/SOX9/KRT33B/EMP1/FLNB/POU2F3/EPHA2/RUNX1/CASP3/FABP5/SHH/BNC1/KRT15/CST6/JAG2/KRT79/LCE2A/LCE2C/KRTAP1-1/LAMB3/PDGFA/HES5/KRT81/KRTAP4-9/KRTAP2-3	45
GO:0018108	GO:0018108	peptidyl-tyrosine phosphorylation	55/1060	281/12280	5.36554e-09	1.7277e-06	1.35174e-06	CRLF1/IGF1/CNTN1/MAP2K3/STYK1/TIE1/FGFR3/NOX4/ICAM1/IL11/PDGFB/FLT1/EHD4/TGFB1/CSF3/AREG/VEGFA/HBEGF/PRLR/FGF1/HES1/CBLB/ERRFI1/EREG/LIF/DLG4/IL6/FGF5/FGF2/EPHA2/ABL2/PTPRJ/EPHB1/FGF18/NRG1/ITGA5/IL24/TGFA/ADORA1/PRKCD/CSF2/RET/GREM1/IL12A/CSPG4/SH3BP5L/CLCF1/CSF1R/SOCS3/TNFRSF18/PDGFA/HES5/MIR221/ITGB3/CD24	55
GO:0048729	GO:0048729	tissue morphogenesis	79/1060	473/12280	6.20764e-09	1.87393e-06	1.46615e-06	SOX8/TNC/GLI2/EDN1/DSP/HIF1A/SMAD7/TGFB1/DKK1/AREG/VEGFA/HBEGF/FGF1/HES1/NR4A3/PGF/TBX2/INHBA/SNAI1/SOX9/VASP/BMP2/WNK4/LIF/PODXL/DLL4/MICAL2/TBX3/SPRY2/FGF2/TPM1/EPHA2/MYOM3/LMO4/RHOB/RSPO3/MSN/ANKRD1/HMGA2/VEGFC/NRG1/MMP14/STC1/ACTC1/CARMIL2/ITGA5/XIRP2/MSX1/HEYL/HHIP/ITGA2/HEY1/SHH/DACT1/RET/SPINT1/GREM1/NKX3-1/GBX2/GDNF/MTSS1/CHD7/ID4/TCAP/CSF1R/TACSTD2/SOCS3/JAG2/WNT7B/PDGFA/HES5/SMURF1/TGM2…	79
GO:0030098	GO:0030098	lymphocyte differentiation	46/1060	218/12280	8.659e-09	2.41462e-06	1.88917e-06	RUNX3/POU2F2/BAK1/PRDM1/CBFB/JMJD6/GLI2/IL4R/TCF7/IL11/NFATC2/SMAD7/LYL1/TGFB1/CD83/VNN1/ITGA4/IL1RL2/INHBA/DLL4/PTPN22/DOCK2/DOCK10/IL6/LRRC8A/NFKBIZ/PIK3R1/PTPRJ/SH3RF1/PLCL2/MMP14/RUNX1/NLRP3/SHH/IL12A/GPR183/CHD7/CLCF1/FZD8/EGR3/JAG2/IFNE/TNFRSF18/CARD11/PNP/MIR17HG	46
GO:0050900	GO:0050900	leukocyte migration	51/1060	255/12280	9.15708e-09	2.41462e-06	1.88917e-06	EDN1/CXCL2/ICAM1/ITGA6/ANGPT2/SLC7A8/HMOX1/PDGFB/BDKRB1/FLT1/SLC7A6/TNFRSF10A/TGFB1/PIK3CG/SERPINE1/CXCL12/CCL7/ADTRP/VEGFA/CCL20/ITGA4/GRB14/PGF/DUSP1/CXCL6/IL1B/IL6/IL33/ITGA9/PIK3R1/MSN/ESAM/VEGFC/CXADR/MMP14/F11R/ITGA5/ADORA1/CXCL3/CXCL5/ITGA2/RET/GREM1/IL12A/CXCL8/GPR183/PDE4B/TNFRSF18/MMP1/PSG1/ITGB3	51
GO:0001503	GO:0001503	ossification	56/1060	293/12280	9.49849e-09	2.41462e-06	1.88917e-06	SOX8/IGF1/VCAN/TNC/GPM6B/CBFB/FGFR3/FSTL3/PTGS2/GLI2/PTHLH/HIF1A/XYLT1/ERCC2/TGFB1/GTPBP4/DKK1/AREG/CYP27B1/ID3/SATB2/SNAI1/SOX9/BMP2/ID1/KREMEN2/MYBBP1A/IL6/SMAD6/SEMA7A/BMPR1B/EPHA2/BMP6/ANKH/KLF10/PPARGC1B/FGF18/MMP14/STC1/NPPC/SHH/DDX21/GREM1/ADRB2/JUNB/ID4/ESRRA/PHOSPHO1/RFLNB/WNT7B/OSTN/SMOC1/SMURF1/MIR138-1/PAM16/SCX	56
GO:0001667	GO:0001667	ameboidal-type cell migration	60/1060	326/12280	1.22248e-08	2.9523e-06	2.30985e-06	SOX8/PRSS3/MAP2K3/PTGS2/EDN1/TNS1/PXN/ANGPT2/HMOX1/PDGFB/HIF1A/FERMT1/TIMP1/TGFB1/ARHGDIB/ADTRP/PPARD/VEGFA/HBEGF/FGF1/AMOTL2/ITGA4/NR4A1/AGO2/SOX9/ID1/DLL4/CAP1/ETS1/PRR5L/SEMA6D/SEMA7A/FGF2/EPHA2/RHOB/DOCK5/VEGFC/PTPRR/FGF18/STC1/ITGA2/SHH/RET/GREM1/GBX2/GDNF/ATOH8/HAS2/PLEKHG5/MMRN2/FOXC2/GATA2/EGR3/C5orf30/TACSTD2/MIR222/MIR221/ITGB3/EPPK1/MIR29A	60
GO:0043269	GO:0043269	regulation of ion transport	70/1060	407/12280	1.38475e-08	3.01854e-06	2.36168e-06	SYT7/CNTN1/KCNG1/BAK1/GPM6B/CAMK2B/ATP2B4/GAL/PTGS2/CACNG4/EDN1/P2RX5/NKAIN1/ABCB1/ICAM1/KCNK6/PDGFB/BDKRB1/HOMER2/KCNA7/TGFB1/PIK3CG/TSPAN13/CXCL12/PPIF/ASIC2/OPRD1/KCNC4/RGS4/IL1B/WNK4/BEST3/MCHR1/DIAPH1/DLG4/ATP8A2/HCN4/PRKG2/STAC2/CASQ1/GSTO1/KCNK13/UBASH3B/KCNMA1/KCNS2/KCNJ15/STC1/LRRC38/KCNF1/ADORA1/PRKCD/GEM/NETO1/RRAD/TRPV3/GDNF/RAB3B/ADRB2/CLIC3/KCNS3/CHD7/SYT12/PDZK1/SCN5A/PDE4B/KCNQ5/I…	70
GO:0072009	GO:0072009	nephron epithelium development	24/1060	77/12280	1.43549e-08	3.01854e-06	2.36168e-06	SOX8/TGFB1/VEGFA/FGF1/HES1/PGF/SOX9/BMP2/WNK4/LIF/PODXL/FGF2/MYO1E/HEYL/SHH/GREM1/GDNF/MTSS1/TACSTD2/WNT7B/HES5/FMN1/FOXD1/CD24	24
GO:0072080	GO:0072080	nephron tubule development	22/1060	66/12280	1.4374e-08	3.01854e-06	2.36168e-06	SOX8/TGFB1/VEGFA/FGF1/HES1/PGF/SOX9/BMP2/WNK4/LIF/FGF2/HEYL/SHH/GREM1/GDNF/MTSS1/TACSTD2/WNT7B/HES5/FMN1/FOXD1/CD24	22
GO:0061326	GO:0061326	renal tubule development	22/1060	67/12280	1.96769e-08	3.93423e-06	3.07811e-06	SOX8/TGFB1/VEGFA/FGF1/HES1/PGF/SOX9/BMP2/WNK4/LIF/FGF2/HEYL/SHH/GREM1/GDNF/MTSS1/TACSTD2/WNT7B/HES5/FMN1/FOXD1/CD24	22
GO:0072006	GO:0072006	nephron development	28/1060	102/12280	2.11781e-08	3.93423e-06	3.07811e-06	SOX8/ANGPT2/PDGFB/TGFB1/VEGFA/FGF1/HES1/PGF/SOX9/BMP2/WNK4/LIF/PODXL/FGF2/MYO1E/HEYL/SHH/RET/GREM1/GDNF/MTSS1/GPR4/TACSTD2/WNT7B/HES5/FMN1/FOXD1/CD24	28
GO:0072073	GO:0072073	kidney epithelium development	28/1060	102/12280	2.11781e-08	3.93423e-06	3.07811e-06	SOX8/CRLF1/SMAD7/TGFB1/VEGFA/FGF1/HES1/PGF/SOX9/BMP2/WNK4/LIF/PODXL/SMAD6/FGF2/MYO1E/HEYL/SHH/RET/GREM1/GDNF/MTSS1/TACSTD2/WNT7B/HES5/FMN1/FOXD1/CD24	28
GO:0045765	GO:0045765	regulation of angiogenesis	46/1060	226/12280	2.80027e-08	5.00936e-06	3.91928e-06	TNFRSF12A/TIE1/PTGS2/ANGPT2/HMOX1/HIF1A/FLT1/SERPINE1/VEGFA/FGF1/FASLG/TNFAIP3/PGF/AGO2/IL1B/ID1/KLF2/DLL4/ETS1/CEMIP2/SPRY2/IL6/FGF2/EPHA2/RHOB/ADAM12/HMGA2/VEGFC/FGF18/RUNX1/HK2/ITGA5/GREM1/ANGPTL4/MINAR1/CXCL8/MMRN2/SPHK1/FOXC2/GPR4/GATA2/MIR377/MIR222/MIR221/MIR138-1/MIR29A	46
GO:0042060	GO:0042060	wound healing	65/1060	374/12280	3.06101e-08	5.28024e-06	4.13121e-06	TNFRSF12A/CD9/SYT7/PLAUR/IGF1/PRKCH/TNC/DCBLD2/DGKD/EDN1/P2RX5/ITPR3/DSP/SERPIND1/HMOX1/PDGFB/HIF1A/TIMP1/DGKH/TGFB1/TFPI2/PIK3CG/SERPINE1/SGCA/VWF/ELK3/SH2B3/ADTRP/PPARD/HBEGF/TNFAIP3/EREG/PRKCG/PTPN12/LARGE1/ETS1/IL6/FGF2/TPM1/ITGA9/PIK3R1/FERMT3/UBASH3B/NRG1/DGKI/CSRP1/CARMIL2/ITGA5/IL24/PRKCD/ITGA2/CASP3/SHH/FOXC2/GPR4/THBD/GATA2/PDGFA/SERPINB2/MAFK/MIR221/ITGB3/EPPK1/MMP12/ANXA8	65
GO:0040017	GO:0040017	positive regulation of locomotion	72/1060	433/12280	3.6052e-08	5.89837e-06	4.61483e-06	IGF1/MAP2K3/LAMC2/PTGS2/EDN1/NOX4/ICAM1/ITGA6/HMOX1/PDGFB/HIF1A/BDKRB1/FLT1/TGFB1/SERPINE1/CXCL12/CCL7/BVES/VEGFA/HBEGF/FGF1/CCL20/ITGA4/TACR1/NR4A3/PGF/CD274/TNFAIP6/AGO2/SNAI1/SOX9/IL1B/BMP2/PODXL/DIAPH1/NUMB/ETS1/SPRY2/IL6/SEMA6D/SEMA7A/FGF2/VPS37B/RHOB/PIK3R1/DOCK5/FERMT3/VEGFC/FGF18/MMP14/CARMIL2/ITGA5/ITGA2/RET/STX3/IL12A/ATOH8/CXCL8/HAS2/LRRC15/SPHK1/FOXC2/GATA2/FAM83H/CSF1R/IRS2/TNFRSF18/…	72
GO:0061061	GO:0061061	muscle structure development	77/1060	475/12280	3.66358e-08	5.89837e-06	4.61483e-06	SOX8/JARID2/IGF1/USP2/IL4R/EDN1/NOX4/DSP/PDGFB/ASB2/NFATC2/SMAD7/OLFM2/TGFB1/DKK1/SGCA/PPARD/BVES/VEGFA/HBEGF/HES1/RGS4/ID3/TBX2/EREG/SOX9/BMP2/HIVEP3/LIF/FLNC/DLL4/SYNE1/POPDC3/LARGE1/ARNTL/TBX3/FLNB/ALPK3/TMOD1/STRA6/MYPN/FGF2/TPM1/MYOCD/MYOM3/CASQ1/ITGB1BP2/ANKRD1/ADAM12/CXADR/EPHB1/NRG1/MMP14/MRAS/ACTC1/XIRP2/PDLIM5/MSX1/HEYL/CASP3/HEY1/SHH/GREM1/CDH2/CAVIN4/CHD7/TCAP/EGR3/NKX2-6/BHLHA15/SMTN…	77
GO:2000147	GO:2000147	positive regulation of cell motility	69/1060	409/12280	3.89969e-08	6.01596e-06	4.70683e-06	IGF1/MAP2K3/LAMC2/PTGS2/EDN1/NOX4/ICAM1/ITGA6/HMOX1/PDGFB/HIF1A/BDKRB1/FLT1/TGFB1/SERPINE1/CXCL12/CCL7/VEGFA/HBEGF/FGF1/CCL20/ITGA4/TACR1/NR4A3/PGF/CD274/TNFAIP6/AGO2/SNAI1/SOX9/IL1B/BMP2/PODXL/DIAPH1/NUMB/ETS1/SPRY2/IL6/SEMA6D/SEMA7A/FGF2/RHOB/PIK3R1/DOCK5/FERMT3/VEGFC/FGF18/MMP14/CARMIL2/ITGA5/ITGA2/RET/IL12A/ATOH8/CXCL8/HAS2/LRRC15/SPHK1/FOXC2/GATA2/FAM83H/CSF1R/IRS2/TNFRSF18/PDGFA/MIR222/MIR2…	69
GO:0030335	GO:0030335	positive regulation of cell migration	68/1060	401/12280	3.98573e-08	6.01596e-06	4.70683e-06	IGF1/MAP2K3/LAMC2/PTGS2/EDN1/NOX4/ICAM1/ITGA6/HMOX1/PDGFB/HIF1A/BDKRB1/FLT1/TGFB1/SERPINE1/CXCL12/CCL7/VEGFA/HBEGF/FGF1/CCL20/ITGA4/NR4A3/PGF/CD274/TNFAIP6/AGO2/SNAI1/SOX9/IL1B/BMP2/PODXL/DIAPH1/NUMB/ETS1/SPRY2/IL6/SEMA6D/SEMA7A/FGF2/RHOB/PIK3R1/DOCK5/FERMT3/VEGFC/FGF18/MMP14/CARMIL2/ITGA5/ITGA2/RET/IL12A/ATOH8/CXCL8/HAS2/LRRC15/SPHK1/FOXC2/GATA2/FAM83H/CSF1R/IRS2/TNFRSF18/PDGFA/MIR222/MIR221/ITG…	68
GO:0046649	GO:0046649	lymphocyte activation	70/1060	419/12280	4.63289e-08	6.58143e-06	5.14925e-06	ERCC1/IGF1/RUNX3/POU2F2/BAK1/PRDM1/CBFB/GAL/JMJD6/GLI2/IL4R/TCF7/LAT2/ICAM1/IL11/NFATC2/SMAD7/IL21R/LYL1/IL27RA/TGFB1/PIK3CG/CD83/VNN1/PRLR/HES1/ITGA4/IL1RL2/TNFAIP3/CD274/INHBA/IL1B/DLL4/ULBP2/PTPN22/DOCK2/HAVCR2/DOCK10/IL6/LRRC8A/NFKBIZ/PIK3R1/MSN/PTPRJ/SH3RF1/CXADR/PLCL2/EPHB1/MMP14/RUNX1/NLRP3/PRKCD/CASP3/SHH/IL12A/GPR183/CHD7/CTPS1/CLCF1/FZD8/EGR3/JAG2/IFNE/IRS2/TNFRSF18/SLC39A10/CARD11/PNP/…	70
GO:0051272	GO:0051272	positive regulation of cellular component movement	70/1060	419/12280	4.63289e-08	6.58143e-06	5.14925e-06	IGF1/MAP2K3/LAMC2/PTGS2/MAP2/EDN1/NOX4/ICAM1/ITGA6/HMOX1/PDGFB/HIF1A/BDKRB1/FLT1/TGFB1/SERPINE1/CXCL12/CCL7/VEGFA/HBEGF/FGF1/CCL20/ITGA4/TACR1/NR4A3/PGF/CD274/TNFAIP6/AGO2/SNAI1/SOX9/IL1B/BMP2/PODXL/DIAPH1/NUMB/ETS1/SPRY2/IL6/SEMA6D/SEMA7A/FGF2/RHOB/PIK3R1/DOCK5/FERMT3/VEGFC/FGF18/MMP14/CARMIL2/ITGA5/ITGA2/RET/IL12A/ATOH8/CXCL8/HAS2/LRRC15/SPHK1/FOXC2/GATA2/FAM83H/CSF1R/IRS2/TNFRSF18/PDGFA/MIR222…	70
GO:0006954	GO:0006954	inflammatory response	70/1060	422/12280	6.19736e-08	8.55235e-06	6.69128e-06	MMP25/BIRC3/TNFRSF1B/MAP2K3/TNIP3/GAL/PTGS2/MGLL/IL4R/CXCL2/NOX4/ICAM1/PTGS1/HMOX1/HIF1A/BDKRB1/TIMP1/TGFB1/PIK3CG/SERPINE1/CCL7/BIRC2/PPARD/VNN1/CCL20/ITGB6/TACR1/IL1RL2/IL1RL1/TNFAIP3/GPR68/PTGFR/TNFAIP6/CXCL6/IL1B/BMP2/IRAK2/TSPAN2/ETS1/HAVCR2/NT5E/IL6/IL33/SEMA7A/BMPR1B/EPHA2/SUSD4/NFKBIZ/MMP3/BMP6/MAPK13/F11R/NLRP3/ADORA1/CXCL3/CXCL5/PRKCD/ITGA2/CXCL8/NRROS/CHST2/SPHK1/METRNL/C5orf30/CSF1R/S…	70
GO:0003013	GO:0003013	circulatory system process	58/1060	325/12280	6.65838e-08	8.93333e-06	6.98935e-06	MAP2K3/ELN/ATP2B4/PTGS2/EDN1/NOX4/ICAM1/PTGS1/ITPR3/DSP/KCNK6/HMOX1/PDGFB/BDKRB1/SMAD7/NCALD/PPP1R13L/TGFB1/COMP/PIK3CG/CXCL12/ASIC2/PPARD/BVES/HBEGF/RGS4/SGK1/TBX2/DLL4/HCN4/TPM1/CASQ1/REN/DOCK5/GSTO1/PTPRJ/PLCB3/VEGFC/CXADR/ATP2B2/F11R/STC1/ACTC1/NPPC/ADORA1/NAV2/ADRB2/KCNK3/CHD7/PDE3A/HSPB7/TCAP/DES/P2RY2/HTR1D/GJC1/SCN5A/PDE4B	58
GO:0008015	GO:0008015	blood circulation	57/1060	318/12280	7.40146e-08	9.66191e-06	7.55939e-06	MAP2K3/ELN/ATP2B4/PTGS2/EDN1/ICAM1/PTGS1/ITPR3/DSP/KCNK6/HMOX1/PDGFB/BDKRB1/SMAD7/NCALD/PPP1R13L/TGFB1/COMP/PIK3CG/CXCL12/ASIC2/PPARD/BVES/HBEGF/RGS4/SGK1/TBX2/DLL4/HCN4/TPM1/CASQ1/REN/DOCK5/GSTO1/PTPRJ/PLCB3/VEGFC/CXADR/ATP2B2/F11R/STC1/ACTC1/NPPC/ADORA1/NAV2/ADRB2/KCNK3/CHD7/PDE3A/HSPB7/TCAP/DES/P2RY2/HTR1D/GJC1/SCN5A/PDE4B	57
GO:0007186	GO:0007186	G protein-coupled receptor signaling pathway	75/1060	467/12280	8.22836e-08	1.04587e-05	8.18278e-06	ATP2B4/NGEF/GAL/MGLL/DGKD/EDN1/CXCL2/PTHLH/EZR/ITPR3/GRK3/BDKRB1/DGKH/HOMER2/PIK3CG/ATRNL1/CXCL12/RASD1/CCL7/AREG/CCL20/TACR1/KISS1R/OPRD1/PDC/RGS4/GPR68/OGFRL1/PTGFR/CXCL6/EREG/MCHR1/AKAP12/GABBR2/RGS3/SSTR1/RHOB/UCN2/PIK3R1/PLCB3/PLCL2/DGKI/ADGRL4/ADORA1/CXCL3/CXCL5/ARHGEF3/GNG4/ADRB2/CXCL8/GPR183/KISS1/PDE7B/PLEKHG5/ADRA1D/PDE3A/ADGRG2/NET1/P2RY2/SPHK1/FZD8/GPR4/HTR1D/GPBAR1/BHLHA15/S1PR5/GPR1…	75
GO:0019221	GO:0019221	cytokine-mediated signaling pathway	76/1060	483/12280	1.59044e-07	1.9697e-05	1.54107e-05	CRLF1/TNFRSF12A/BIRC3/TNFRSF1B/CAMK2B/CBFB/PTGS2/IL4R/EDN1/CXCL2/ICAM1/IL11/MTAP/HMOX1/PDGFB/HIF1A/TIMP1/IL21R/IL27RA/TGFB1/STX1A/CXCL12/CSF3/CCL7/BIRC2/VEGFA/PRLR/CCL20/IL1RL2/IL1RL1/OPRD1/FASLG/TNFAIP3/SOCS2/IL13RA2/CXCL6/EREG/MT2A/IL1B/RAP1B/LIF/IRAK2/IL6/IL33/FGF2/MCL1/PIK3R1/MSN/GSTO1/MMP3/RUNX1/IL24/CXCL3/CXCL5/PRKCD/CASP3/CSF2/STX3/IL12A/CXCL8/LIMS1/JUNB/CLCF1/SPHK1/GREM2/TNFSF15/CSF1R/SOC…	76
GO:0002040	GO:0002040	sprouting angiogenesis	27/1060	105/12280	1.65715e-07	2.00101e-05	1.56557e-05	JMJD6/PTGS2/HMOX1/ADTRP/VEGFA/FGF1/PGF/NR4A1/KLF2/DLL4/CEMIP2/FGF2/EPHA2/RSPO3/VEGFC/ITGA5/ESM1/E2F7/GREM1/MMRN2/FOXC2/GATA2/EGR3/MIR377/MIR222/MIR221/MIR138-1	27
GO:0045785	GO:0045785	positive regulation of cell adhesion	51/1060	279/12280	1.9188e-07	2.26043e-05	1.76854e-05	IGF1/RUNX3/CBFB/FSTL3/GLI2/IL4R/ICAM1/ITGA6/FERMT1/SMAD7/TGFB1/CXCL12/CD83/VNN1/VEGFA/HES1/ITGA4/IL1RL2/NR4A3/CD274/IL1B/PODXL/ETS1/ADAM19/HAVCR2/IL6/TPM1/NFKBIZ/MYO10/PIK3R1/DOCK5/PTPRJ/RUNX1/ITGA5/NLRP3/ITGA2/SHH/RET/STX3/IL12A/LIMS1/HAS2/MMRN2/FOXC2/EGR3/TNFRSF18/CARD11/PNP/TGM2/FMN1/CD24	51
GO:0048738	GO:0048738	cardiac muscle tissue development	34/1060	153/12280	2.07402e-07	2.38512e-05	1.8661e-05	JARID2/IGF1/EDN1/NOX4/DSP/SMAD7/PPP1R13L/TGFB1/DKK1/BVES/VEGFA/RGS4/TBX2/BMP2/DLL4/TBX3/ALPK3/FGF2/TPM1/MYOCD/MYOM3/ANKRD1/CXADR/NRG1/ACTC1/XIRP2/PDLIM5/GREM1/CHD7/TCAP/NKX2-6/GJC1/MIR222/MIR17HG	34
GO:0072001	GO:0072001	renal system development	44/1060	227/12280	2.44296e-07	2.74407e-05	2.14694e-05	SOX8/CRLF1/FSTL3/JMJD6/GLI2/ITGA6/ANGPT2/PDGFB/SMAD7/TGFB1/VEGFA/FGF1/HES1/ODC1/ID3/PGF/SOX9/BMP2/WNK4/LIF/PODXL/SMAD6/STRA6/FGF2/MYOCD/REN/BMP6/MYO1E/HEYL/SHH/RET/GREM1/NKX3-1/GDNF/MTSS1/HAS2/GPR4/TACSTD2/WNT7B/PDGFA/HES5/FMN1/FOXD1/CD24	44
GO:0022407	GO:0022407	regulation of cell-cell adhesion	48/1060	258/12280	2.54878e-07	2.79787e-05	2.18902e-05	CD9/IGF1/RUNX3/CBFB/FSTL3/GLI2/IL4R/ICAM1/ITGA6/SMAD7/TGFB1/CXCL12/GTPBP4/ADTRP/CD83/VNN1/HES1/ITGA4/IL1RL2/NR4A3/CD274/IL1B/BMP2/PODXL/PTPN22/ETS1/ADAM19/HAVCR2/IL6/NFKBIZ/MYO10/PIK3R1/FERMT3/UBASH3B/RUNX1/NLRP3/PRKCD/CASP3/SHH/IL12A/HAS2/EGR3/CARD11/PNP/MIR222/MIR221/TENM3/CD24	48
GO:0022409	GO:0022409	positive regulation of cell-cell adhesion	35/1060	162/12280	2.85178e-07	3.06091e-05	2.39483e-05	IGF1/RUNX3/CBFB/FSTL3/GLI2/IL4R/ICAM1/ITGA6/SMAD7/TGFB1/CD83/VNN1/HES1/ITGA4/IL1RL2/NR4A3/CD274/IL1B/PODXL/ETS1/ADAM19/HAVCR2/IL6/NFKBIZ/MYO10/PIK3R1/RUNX1/NLRP3/SHH/IL12A/HAS2/EGR3/CARD11/PNP/CD24	35
GO:0072088	GO:0072088	nephron epithelium morphogenesis	18/1060	54/12280	2.9587e-07	3.07929e-05	2.4092e-05	SOX8/TGFB1/VEGFA/FGF1/HES1/PGF/SOX9/BMP2/WNK4/LIF/FGF2/SHH/GREM1/GDNF/TACSTD2/HES5/FMN1/FOXD1	18
GO:0090287	GO:0090287	regulation of cellular response to growth factor stimulus	41/1060	206/12280	2.99641e-07	3.07929e-05	2.4092e-05	FSTL3/HIF1A/DOK5/FERMT1/SMAD7/FLT1/TGFB1/DKK1/SNX25/VEGFA/FGF1/HES1/PMEPA1/IL1B/SPRY2/SKIL/SMAD6/FGF2/MYOCD/PRDM16/DLX1/VEGFC/FGF18/XDH/ITGA5/MSX1/HHIP/GREM1/HTRA3/CHST11/MMRN2/NRROS/SHISA2/GREM2/SPRY4/ADAMTSL2/HES5/SMURF1/MIR17HG/FOXD1/ITGB3	41
GO:0001655	GO:0001655	urogenital system development	47/1060	252/12280	3.14894e-07	3.16862e-05	2.4791e-05	SOX8/CRLF1/TNC/FSTL3/JMJD6/GLI2/ITGA6/ANGPT2/PDGFB/SMAD7/TGFB1/VEGFA/FGF1/HES1/ODC1/ID3/PGF/SOX9/BMP2/WNK4/LIF/PODXL/SMAD6/STRA6/FGF2/MYOCD/REN/BMP6/MYO1E/HEYL/SHH/RET/GREM1/NKX3-1/GDNF/MTSS1/HAS2/ID4/GPR4/GATA2/TACSTD2/WNT7B/PDGFA/HES5/FMN1/FOXD1/CD24	47
GO:0030198	GO:0030198	extracellular matrix organization	49/1060	268/12280	3.30917e-07	3.26189e-05	2.55207e-05	TNFRSF1B/VCAN/TNC/GPM6B/ELN/LAMC2/COL17A1/ICAM1/ITGA6/PDGFB/FERMT1/TIMP1/CRISPLD2/ERCC2/TGFB1/COMP/SERPINE1/VWF/ADTRP/ITGB6/ITGA4/COL10A1/SOX9/ETS1/ADAM19/FGF2/ITGA9/ADAM12/MMP3/MMP14/MYO1E/F11R/ADAMTS4/CARMIL2/ITGA5/ITGA2/SPINT1/MMP10/GREM1/HAS2/COL25A1/MMP1/COL27A1/LAMB3/PDGFA/ADAMTSL2/ITGB3/SCX/MMP12	49
GO:0061333	GO:0061333	renal tubule morphogenesis	18/1060	55/12280	4.04663e-07	3.8324e-05	2.99843e-05	SOX8/TGFB1/VEGFA/FGF1/HES1/PGF/SOX9/BMP2/WNK4/FGF2/SHH/GREM1/GDNF/MTSS1/TACSTD2/HES5/FMN1/FOXD1	18
GO:0072028	GO:0072028	nephron morphogenesis	18/1060	55/12280	4.04663e-07	3.8324e-05	2.99843e-05	SOX8/TGFB1/VEGFA/FGF1/HES1/PGF/SOX9/BMP2/WNK4/LIF/FGF2/SHH/GREM1/GDNF/TACSTD2/HES5/FMN1/FOXD1	18
GO:0001822	GO:0001822	kidney development	42/1060	216/12280	4.18339e-07	3.88572e-05	3.04015e-05	SOX8/CRLF1/FSTL3/JMJD6/GLI2/ANGPT2/PDGFB/SMAD7/TGFB1/VEGFA/FGF1/HES1/ODC1/ID3/PGF/SOX9/BMP2/WNK4/LIF/PODXL/SMAD6/STRA6/FGF2/REN/BMP6/MYO1E/HEYL/SHH/RET/GREM1/NKX3-1/GDNF/MTSS1/HAS2/GPR4/TACSTD2/WNT7B/PDGFA/HES5/FMN1/FOXD1/CD24	42
GO:0007517	GO:0007517	muscle organ development	52/1060	294/12280	4.26871e-07	3.89017e-05	3.04363e-05	SOX8/JARID2/IGF1/USP2/EDN1/DSP/ASB2/SMAD7/TGFB1/DKK1/SGCA/BVES/HBEGF/RGS4/ID3/TBX2/BMP2/HIVEP3/LIF/DLL4/POPDC3/LARGE1/ARNTL/FLNB/STRA6/FGF2/TPM1/MYOCD/MYOM3/CASQ1/ITGB1BP2/ANKRD1/CXADR/EPHB1/NRG1/MRAS/ACTC1/XIRP2/MSX1/HEYL/SHH/GREM1/CAVIN4/CHD7/TCAP/EGR3/SMTN/DNER/TEAD4/MIR222/MIR17HG/SCX	52
GO:0042531	GO:0042531	positive regulation of tyrosine phosphorylation of STAT protein	15/1060	40/12280	5.0821e-07	4.54566e-05	3.55648e-05	CRLF1/IGF1/FGFR3/HES1/LIF/IL6/IL24/CSF2/IL12A/CLCF1/CSF1R/SOCS3/TNFRSF18/HES5/MIR221	15
GO:1902105	GO:1902105	regulation of leukocyte differentiation	37/1060	181/12280	5.67306e-07	4.98198e-05	3.89785e-05	RUNX3/PRDM1/CBFB/FSTL3/GLI2/IL4R/NFATC2/SMAD7/TGFB1/CD83/VNN1/IL1RL2/GPR68/INHBA/LIF/NFKBIZ/PIK3R1/UBASH3B/SH3RF1/KLF10/PPARGC1B/MMP14/RUNX1/NLRP3/SHH/DCSTAMP/IL12A/ESRRA/TRIB1/GATA2/EGR3/EVI2B/TNFRSF18/SIGLEC15/CARD11/PNP/MIR17HG	37
GO:0007159	GO:0007159	leukocyte cell-cell adhesion	41/1060	212/12280	6.65461e-07	5.7396e-05	4.49061e-05	IGF1/RUNX3/CBFB/GLI2/IL4R/ICAM1/EZR/SMAD7/TGFB1/CXCL12/ADTRP/CD83/VNN1/HES1/ITGA4/IL1RL2/NR4A3/CD274/IL1B/PTPN22/ETS1/HAVCR2/NT5E/IL6/NFKBIZ/PIK3R1/MSN/FERMT3/RUNX1/ITGA5/NLRP3/CASP3/SHH/IL12A/HAS2/EGR3/CARD11/PNP/MIR222/MIR221/CD24	41
GO:0090130	GO:0090130	tissue migration	45/1060	244/12280	7.76811e-07	6.58245e-05	5.15005e-05	PRSS3/MAP2K3/PTGS2/EDN1/PXN/ANGPT2/HMOX1/PDGFB/HIF1A/FERMT1/TGFB1/ADTRP/PPARD/VEGFA/HBEGF/FGF1/NR4A1/SOX9/ID1/DLL4/ETS1/FGF2/EPHA2/RHOB/DOCK5/VEGFC/PTPRR/FGF18/STC1/ACTC1/ITGA2/GREM1/ATOH8/HAS2/PLEKHG5/MMRN2/FOXC2/GATA2/EGR3/TACSTD2/MIR222/MIR221/ITGB3/EPPK1/MIR29A	45
GO:0072078	GO:0072078	nephron tubule morphogenesis	17/1060	52/12280	8.63251e-07	7.1888e-05	5.62445e-05	SOX8/TGFB1/VEGFA/FGF1/HES1/PGF/SOX9/BMP2/WNK4/FGF2/SHH/GREM1/GDNF/TACSTD2/HES5/FMN1/FOXD1	17
GO:0060326	GO:0060326	cell chemotaxis	35/1060	170/12280	9.5734e-07	7.83721e-05	6.13176e-05	EDN1/CXCL2/PDGFB/FLT1/PIK3CG/SERPINE1/CXCL12/CCL7/VEGFA/HBEGF/FGF1/CCL20/PGF/DUSP1/NR4A1/CXCL6/IL1B/IL6/FGF2/EPHA2/ITGA9/VEGFC/CXADR/EPHB1/FGF18/CXCL3/CXCL5/PRKCD/GREM1/IL12A/CXCL8/GPR183/PLEKHG5/EGR3/PDE4B	35
GO:0090184	GO:0090184	positive regulation of kidney development	13/1060	32/12280	1.00469e-06	8.08779e-05	6.32781e-05	SOX8/PDGFB/TGFB1/VEGFA/SOX9/LIF/SHH/RET/GREM1/GDNF/PDGFA/FOXD1/CD24	13
GO:0010631	GO:0010631	epithelial cell migration	44/1060	240/12280	1.2166e-06	9.47771e-05	7.41528e-05	PRSS3/MAP2K3/PTGS2/EDN1/PXN/ANGPT2/HMOX1/PDGFB/HIF1A/FERMT1/TGFB1/ADTRP/PPARD/VEGFA/HBEGF/FGF1/NR4A1/SOX9/ID1/DLL4/ETS1/FGF2/EPHA2/RHOB/DOCK5/VEGFC/PTPRR/FGF18/STC1/ITGA2/GREM1/ATOH8/HAS2/PLEKHG5/MMRN2/FOXC2/GATA2/EGR3/TACSTD2/MIR222/MIR221/ITGB3/EPPK1/MIR29A	44
GO:0090132	GO:0090132	epithelium migration	44/1060	240/12280	1.2166e-06	9.47771e-05	7.41528e-05	PRSS3/MAP2K3/PTGS2/EDN1/PXN/ANGPT2/HMOX1/PDGFB/HIF1A/FERMT1/TGFB1/ADTRP/PPARD/VEGFA/HBEGF/FGF1/NR4A1/SOX9/ID1/DLL4/ETS1/FGF2/EPHA2/RHOB/DOCK5/VEGFC/PTPRR/FGF18/STC1/ITGA2/GREM1/ATOH8/HAS2/PLEKHG5/MMRN2/FOXC2/GATA2/EGR3/TACSTD2/MIR222/MIR221/ITGB3/EPPK1/MIR29A	44
GO:1903708	GO:1903708	positive regulation of hemopoiesis	30/1060	137/12280	1.48024e-06	0.000113485	8.87894e-05	RUNX3/CBFB/GLI2/IL4R/HIF1A/TGFB1/CSF3/CD83/VNN1/IL1RL2/GPR68/INHBA/LIF/ETS1/NFKBIZ/KLF10/PPARGC1B/MMP14/RUNX1/NLRP3/SHH/DCSTAMP/IL12A/TRIB1/GATA2/EGR3/EVI2B/PNP/MIR222/MIR221	30
GO:0050673	GO:0050673	epithelial cell proliferation	50/1060	290/12280	1.55057e-06	0.00011702	9.15551e-05	IGF1/RUNX3/HMOX1/PDGFB/HIF1A/FERMT1/FLT1/TGFB1/CXCL12/AREG/PPARD/VEGFA/FGF1/HES1/ITGA4/ERRFI1/RPS6KA1/TNFAIP3/NR4A3/PGF/NR4A1/EREG/SOX9/BMP2/ID1/DLL4/EHF/FGF2/EPHA2/VEGFC/BMP6/MMP14/XDH/TGFA/SHH/NKX3-1/ATOH8/MTSS1/HAS2/ERN1/GATA2/EGR3/SCN5A/TACSTD2/HES5/MIR222/ITGB3/EPPK1/MMP12/MIR29A	50
GO:0001763	GO:0001763	morphogenesis of a branching structure	32/1060	152/12280	1.66801e-06	0.000122639	9.5952e-05	SOX8/TNC/PRDM1/GLI2/EDN1/TGFB1/AREG/VEGFA/FGF1/DLX2/PGF/SOX9/BMP2/DLL4/TBX3/SPRY2/FGF2/EPHA2/RSPO3/MMP14/HHIP/SHH/SPINT1/GREM1/NKX3-1/GBX2/GDNF/TACSTD2/SOCS3/PDGFA/TGM2/FOXD1	32
GO:0030336	GO:0030336	negative regulation of cell migration	39/1060	204/12280	1.67582e-06	0.000122639	9.5952e-05	TIE1/NAV3/ANGPT2/HMOX1/SMAD7/TIMP1/TGFB1/SERPINE1/CXCL12/GTPBP4/ARHGDIB/ADTRP/PPARD/DUSP1/DLL4/IL33/SEMA6D/FGF2/TPM1/MYOCD/RHOB/PTPRJ/PTPRR/NRG1/STC1/IL24/ADORA1/SHH/GREM1/MMRN2/TRIB1/MCTP1/C5orf30/TACSTD2/SRGAP1/MIR221/MIR138-1/EPPK1/MIR29A	39
GO:0001823	GO:0001823	mesonephros development	20/1060	72/12280	1.7783e-06	0.000128197	0.0001003	SOX8/CRLF1/SMAD7/TGFB1/VEGFA/FGF1/HES1/PGF/SOX9/BMP2/SMAD6/FGF2/REN/SHH/RET/GREM1/GDNF/TACSTD2/FMN1/FOXD1	20
GO:0009611	GO:0009611	response to wounding	69/1060	452/12280	1.84756e-06	0.000131231	0.000102674	TNFRSF12A/CD9/SYT7/PLAUR/IGF1/PRKCH/TNC/DCBLD2/DGKD/EDN1/SLC1A3/P2RX5/ITPR3/DSP/SERPIND1/HMOX1/PDGFB/HIF1A/TIMP1/DGKH/TGFB1/TFPI2/PIK3CG/SERPINE1/SGCA/VWF/ELK3/SH2B3/ADTRP/PPARD/HBEGF/ID3/TNFAIP3/EREG/PRKCG/PTPN12/LARGE1/ETS1/IL6/FGF2/TPM1/ITGA9/PIK3R1/FERMT3/UBASH3B/NRG1/DGKI/CSRP1/CARMIL2/ITGA5/IL24/PRKCD/ITGA2/CASP3/SHH/FOXC2/GPR4/THBD/GATA2/CREB3L2/PDGFA/SERPINB2/MAFK/MIR222/MIR221/ITGB3/EPPK…	69
GO:0043410	GO:0043410	positive regulation of MAPK cascade	61/1060	384/12280	1.97997e-06	0.000138598	0.000108437	IGF1/MAP2K3/TIE1/FGFR3/EDN1/NOX4/ICAM1/IL11/GADD45B/PDGFB/DOK5/FLT1/TGFB1/PIK3CG/DKK1/CCL7/VEGFA/FGF1/WWC1/CCL20/IL1B/BMP2/RAP1B/LIF/GADD45G/IRAK2/PTPN22/NGF/HAVCR2/SPRY2/IL6/DUSP5/SEMA7A/FGF2/EPHA2/PTPRJ/SH3RF1/EPHB1/FGF18/NRG1/XDH/TGFA/ADORA1/NEK10/DUSP7/RET/MLKL/ADRB2/GPR183/KISS1/CDH2/CSPG4/FZD8/ERN1/CSF1R/TNFAIP8L3/WNT7B/PDGFA/MIR222/MIR221/CD24	61
GO:0050865	GO:0050865	regulation of cell activation	56/1060	343/12280	2.20101e-06	0.000151869	0.000118821	CD9/IGF1/RUNX3/PRDM1/CBFB/GAL/GLI2/IL4R/HMOX1/PDGFB/NFATC2/SMAD7/IL27RA/TGFB1/CD83/VNN1/HES1/IL1RL2/IL1RL1/RPS6KA1/TNFAIP3/NR4A3/CD274/INHBA/IL13RA2/IL1B/PTPN22/HAVCR2/IL6/IL33/LMO4/NFKBIZ/PIK3R1/UBASH3B/SH3RF1/MMP14/RUNX1/NLRP3/PRKCD/CASP3/SHH/IL12A/GPR183/CLCF1/THBD/GATA2/EGR3/FAM19A3/IRS2/TNFRSF18/SLC39A10/PDGFA/CARD11/PNP/MIR17HG/CD24	56
GO:0032496	GO:0032496	response to lipopolysaccharide	40/1060	214/12280	2.23597e-06	0.000152109	0.000119009	TNFRSF1B/TNIP3/PTGS2/EDN1/CXCL2/ICAM1/BDKRB1/TGFB1/SERPINE1/MAPK8/CSF3/CYP27B1/PPARD/FASLG/TNFAIP3/CD274/PTGFR/CXCL6/IL1B/IRAK2/PTPN22/HAVCR2/IL6/REN/ANKRD1/BMP6/NLRP3/IL24/CXCL3/CXCL5/CASP3/CSF2/GJB2/IL12A/CXCL8/JUNB/TRIB1/RPS6KA3/THBD/PDE4B	40
GO:0060993	GO:0060993	kidney morphogenesis	19/1060	67/12280	2.28501e-06	0.000153286	0.00011993	SOX8/TGFB1/VEGFA/FGF1/HES1/PGF/SOX9/BMP2/WNK4/LIF/FGF2/SHH/GREM1/GDNF/TACSTD2/WNT7B/HES5/FMN1/FOXD1	19
GO:0046427	GO:0046427	positive regulation of JAK-STAT cascade	16/1060	50/12280	2.49562e-06	0.000165121	0.000129189	CRLF1/IGF1/FGFR3/PRLR/HES1/LIF/IL6/IL24/CSF2/IL12A/CLCF1/CSF1R/SOCS3/TNFRSF18/HES5/MIR221	16
GO:0002237	GO:0002237	response to molecule of bacterial origin	41/1060	223/12280	2.59186e-06	0.000169171	0.000132358	TNFRSF1B/TNIP3/PTGS2/EDN1/CXCL2/ICAM1/BDKRB1/TGFB1/SERPINE1/MAPK8/CSF3/CYP27B1/PPARD/FASLG/TNFAIP3/CD274/PTGFR/CXCL6/IL1B/IRAK2/PTPN22/HAVCR2/IL6/REN/ANKRD1/BMP6/NLRP3/IL24/CXCL3/CXCL5/CASP3/CSF2/GJB2/IL12A/CXCL8/JUNB/TRIB1/RPS6KA3/THBD/PDE4B/CD24	41
GO:0061138	GO:0061138	morphogenesis of a branching epithelium	30/1060	141/12280	2.78237e-06	0.000176329	0.000137958	SOX8/TNC/GLI2/EDN1/TGFB1/AREG/VEGFA/FGF1/PGF/SOX9/BMP2/DLL4/TBX3/SPRY2/FGF2/EPHA2/RSPO3/MMP14/HHIP/SHH/SPINT1/GREM1/NKX3-1/GBX2/GDNF/TACSTD2/SOCS3/PDGFA/TGM2/FOXD1	30
GO:0003012	GO:0003012	muscle system process	51/1060	304/12280	2.79624e-06	0.000176329	0.000137958	JARID2/IGF1/TNFRSF1B/MAP2K3/CAMK2B/ATP2B4/LMCD1/PTGS2/EDN1/PXN/DSP/HMOX1/SMAD7/PPP1R13L/COMP/PIK3CG/SGCA/TACR1/ERRFI1/RGS4/NR4A3/IL1B/CNN1/ATP8A2/TMOD1/HCN4/TPM1/MYOCD/MYOM3/CASQ1/DOCK5/GSTO1/KCNMA1/STC1/ACTC1/PDLIM5/ADORA1/ITGA2/GDNF/ADRB2/GATM/TCAP/DES/SPHK1/HTR1D/GJC1/SCN5A/SMTN/PDE4B/RCSD1/MIR17HG	51
GO:0070371	GO:0070371	ERK1 and ERK2 cascade	40/1060	216/12280	2.84572e-06	0.000176329	0.000137958	IGF1/TIE1/FGFR3/RPS6KA6/NOX4/ICAM1/EZR/TIMP3/PDGFB/FLT1/TGFB1/CCL7/CCL20/ERRFI1/DUSP1/DUSP4/SOX9/IL1B/BMP2/RAP1B/LIF/PTPN22/HAVCR2/SPRY2/SEMA7A/FGF2/EPHA2/PTPRR/EPHB1/FGF18/NEK10/RET/GPR183/CSF1R/TNFAIP8L3/C1QL4/SPRY4/PDGFA/MIR222/MIR221	40
GO:0051146	GO:0051146	striated muscle cell differentiation	37/1060	193/12280	2.87403e-06	0.000176329	0.000137958	IGF1/IL4R/EDN1/NOX4/NFATC2/TGFB1/DKK1/BVES/VEGFA/RGS4/BMP2/FLNC/TBX3/ALPK3/TMOD1/MYPN/TPM1/MYOCD/MYOM3/CASQ1/ANKRD1/ADAM12/CXADR/NRG1/MMP14/ACTC1/PDLIM5/MSX1/CASP3/SHH/GREM1/CDH2/TCAP/NKX2-6/BHLHA15/DNER/MIR222	37
GO:0060675	GO:0060675	ureteric bud morphogenesis	15/1060	45/12280	2.88406e-06	0.000176329	0.000137958	SOX8/TGFB1/VEGFA/FGF1/HES1/PGF/SOX9/BMP2/FGF2/SHH/GREM1/GDNF/TACSTD2/FMN1/FOXD1	15
GO:0002009	GO:0002009	morphogenesis of an epithelium	60/1060	380/12280	2.93515e-06	0.00017721	0.000138647	SOX8/TNC/GLI2/EDN1/HIF1A/TGFB1/DKK1/AREG/VEGFA/HBEGF/FGF1/HES1/PGF/TBX2/SNAI1/SOX9/VASP/BMP2/WNK4/LIF/PODXL/DLL4/MICAL2/TBX3/SPRY2/FGF2/EPHA2/LMO4/RHOB/RSPO3/MSN/VEGFC/MMP14/CARMIL2/ITGA5/HHIP/SHH/DACT1/RET/SPINT1/GREM1/NKX3-1/GBX2/GDNF/MTSS1/ID4/TCAP/CSF1R/TACSTD2/SOCS3/JAG2/WNT7B/PDGFA/HES5/SMURF1/TGM2/MIR221/FMN1/FOXD1/MMP12	60
GO:0070372	GO:0070372	regulation of ERK1 and ERK2 cascade	38/1060	201/12280	3.00537e-06	0.000179209	0.000140212	TIE1/FGFR3/RPS6KA6/NOX4/ICAM1/EZR/TIMP3/PDGFB/FLT1/TGFB1/CCL7/CCL20/ERRFI1/DUSP1/DUSP4/IL1B/BMP2/RAP1B/LIF/PTPN22/HAVCR2/SPRY2/SEMA7A/FGF2/EPHA2/PTPRR/EPHB1/FGF18/NEK10/RET/GPR183/CSF1R/TNFAIP8L3/C1QL4/SPRY4/PDGFA/MIR222/MIR221	38
GO:0034330	GO:0034330	cell junction organization	42/1060	233/12280	3.32394e-06	0.000195434	0.000152906	CD9/PRKCH/GPM6B/LAMC2/COL17A1/CBFB/TNS1/PKP1/EPB41L3/ITGA6/DSP/SMAD7/TGFB1/VEGFA/CDH6/RASSF8/SNAI1/VASP/RAP1B/FLNC/NUMB/EPHA2/NECTIN4/PTPRJ/CXADR/MMP14/F11R/RUNX1/ITGA5/XIRP2/ITGA2/CLDN3/GJB2/PLEKHA7/GREM1/LIMS1/CDH2/GPBAR1/CSF1R/GJC1/LAMB3/FMN1	42
GO:0045766	GO:0045766	positive regulation of angiogenesis	28/1060	128/12280	3.35839e-06	0.000195434	0.000152906	PTGS2/ANGPT2/HMOX1/HIF1A/FLT1/SERPINE1/VEGFA/FGF1/PGF/AGO2/IL1B/ETS1/FGF2/RHOB/ADAM12/HMGA2/VEGFC/FGF18/RUNX1/HK2/ITGA5/GREM1/ANGPTL4/CXCL8/SPHK1/FOXC2/GATA2/MIR29A	28
GO:0001657	GO:0001657	ureteric bud development	19/1060	69/12280	3.70461e-06	0.000213015	0.000166661	SOX8/CRLF1/SMAD7/TGFB1/VEGFA/FGF1/HES1/PGF/SOX9/BMP2/SMAD6/FGF2/SHH/RET/GREM1/GDNF/TACSTD2/FMN1/FOXD1	19
GO:0072171	GO:0072171	mesonephric tubule morphogenesis	15/1060	46/12280	3.94097e-06	0.00022394	0.000175209	SOX8/TGFB1/VEGFA/FGF1/HES1/PGF/SOX9/BMP2/FGF2/SHH/GREM1/GDNF/TACSTD2/FMN1/FOXD1	15
GO:0042692	GO:0042692	muscle cell differentiation	46/1060	267/12280	4.12633e-06	0.000231746	0.000181316	IGF1/IL4R/EDN1/NOX4/PDGFB/NFATC2/OLFM2/TGFB1/DKK1/BVES/VEGFA/HES1/RGS4/TBX2/EREG/SOX9/BMP2/FLNC/SYNE1/TBX3/ALPK3/TMOD1/MYPN/TPM1/MYOCD/MYOM3/CASQ1/ANKRD1/ADAM12/CXADR/NRG1/MMP14/ACTC1/PDLIM5/MSX1/CASP3/HEY1/SHH/GREM1/CDH2/TCAP/NKX2-6/BHLHA15/DNER/MIR222/MIR221	46
GO:0031214	GO:0031214	biomineral tissue development	24/1060	102/12280	4.3887e-06	0.000235392	0.000184169	IGF1/GPM6B/FGFR3/PTGS2/PTHLH/HIF1A/ERCC2/TGFB1/CYP27B1/SOX9/BMP2/ENAM/BMPR1B/SLC20A1/BMP6/ANKH/KLF10/CNNM4/GREM1/ADRB2/PHOSPHO1/ODAPH/FAM83H/RFLNB	24
GO:0046425	GO:0046425	regulation of JAK-STAT cascade	20/1060	76/12280	4.44903e-06	0.000235392	0.000184169	CRLF1/IGF1/FGFR3/DOT1L/PRLR/HES1/SOCS2/LIF/IL6/IL24/CSF2/RET/IL12A/CLCF1/CSF1R/SOCS3/IFNE/TNFRSF18/HES5/MIR221	20
GO:1904894	GO:1904894	positive regulation of STAT cascade	16/1060	52/12280	4.45212e-06	0.000235392	0.000184169	CRLF1/IGF1/FGFR3/PRLR/HES1/LIF/IL6/IL24/CSF2/IL12A/CLCF1/CSF1R/SOCS3/TNFRSF18/HES5/MIR221	16
GO:0090183	GO:0090183	regulation of kidney development	14/1060	41/12280	4.47027e-06	0.000235392	0.000184169	SOX8/PDGFB/TGFB1/VEGFA/SOX9/LIF/SHH/RET/GREM1/GDNF/TACSTD2/PDGFA/FOXD1/CD24	14
GO:0071772	GO:0071772	response to BMP	25/1060	109/12280	4.56014e-06	0.000235392	0.000184169	FSTL3/SMAD7/DKK1/HES1/SMAD9/SOX9/BMP2/ID1/SKIL/SMAD6/BMPR1B/DLX1/BMP6/MSX1/HEYL/SPINT1/GREM1/HTRA3/RGMB/GREM2/FAM83G/HES5/SMURF1/FOXD1/SCX	25
GO:0071773	GO:0071773	cellular response to BMP stimulus	25/1060	109/12280	4.56014e-06	0.000235392	0.000184169	FSTL3/SMAD7/DKK1/HES1/SMAD9/SOX9/BMP2/ID1/SKIL/SMAD6/BMPR1B/DLX1/BMP6/MSX1/HEYL/SPINT1/GREM1/HTRA3/RGMB/GREM2/FAM83G/HES5/SMURF1/FOXD1/SCX	25
GO:0043588	GO:0043588	skin development	34/1060	174/12280	4.65416e-06	0.000235392	0.000184169	PRKCH/NSUN2/CBFB/GAL/PKP1/ITGA6/DSP/FERMT1/ERCC2/DKK1/CYP27B1/ERRFI1/INHBA/SNAI1/EREG/SOX9/KRT33B/ATP8A2/FLNB/EPHA2/RUNX1/ITGA2/CASP3/SHH/KRT15/KRT79/LCE2A/LCE2C/KRTAP1-1/CLDN4/PDGFA/KRT81/KRTAP4-9/KRTAP2-3	34
GO:0048608	GO:0048608	reproductive structure development	53/1060	326/12280	4.66903e-06	0.000235392	0.000184169	SOX8/ERCC1/BAK1/TNC/PRDM1/FSTL3/PTGS2/GLI2/TCF7/ICAM1/PDGFB/HIF1A/FNDC3A/BIRC2/CYP27B1/PPARD/VEGFA/PCDH12/HES1/INHBA/SNAI1/EREG/SOX9/LIF/VGF/ADAM19/TBX3/STRA6/BMPR1B/MYOCD/REN/RSPO3/BMP6/MMP14/STC1/CASP3/CSF2/HEY1/SHH/GJB2/E2F7/SPINT1/NKX3-1/JUNB/CHD7/ID4/FOSL1/UMODL1/ZFP42/GATA2/SOCS3/WNT7B/SCX	53
GO:0072163	GO:0072163	mesonephric epithelium development	19/1060	70/12280	4.67861e-06	0.000235392	0.000184169	SOX8/CRLF1/SMAD7/TGFB1/VEGFA/FGF1/HES1/PGF/SOX9/BMP2/SMAD6/FGF2/SHH/RET/GREM1/GDNF/TACSTD2/FMN1/FOXD1	19
GO:0072164	GO:0072164	mesonephric tubule development	19/1060	70/12280	4.67861e-06	0.000235392	0.000184169	SOX8/CRLF1/SMAD7/TGFB1/VEGFA/FGF1/HES1/PGF/SOX9/BMP2/SMAD6/FGF2/SHH/RET/GREM1/GDNF/TACSTD2/FMN1/FOXD1	19
GO:0007507	GO:0007507	heart development	65/1060	429/12280	4.76087e-06	0.000237062	0.000185475	JARID2/IGF1/TNFRSF1B/ADAMTS6/ELN/PRDM1/JMJD6/GLI2/EDN1/NOX4/DSP/PDGFB/HIF1A/SMAD7/PPP1R13L/TGFB1/DKK1/PPARD/BVES/VEGFA/HES1/RGS4/ID3/TBX2/SNAI1/SOX9/BMP2/ID1/DLL4/POPDC3/MICAL2/TBX3/ALPK3/SMAD6/STRA6/FGF2/TPM1/MYOCD/MYOM3/LMO4/ANKRD1/CXADR/NRG1/ACTC1/XIRP2/PDLIM5/MSX1/HEYL/CASP3/HEY1/SHH/GREM1/NKX3-1/XIRP1/HAS2/CHD7/HSPB7/TCAP/FOXC2/NKX2-6/GJC1/SCN5A/MIR222/MIR17HG/SCX	65
GO:0060537	GO:0060537	muscle tissue development	48/1060	285/12280	4.89453e-06	0.000241231	0.000188737	SOX8/JARID2/IGF1/EDN1/NOX4/DSP/ASB2/SMAD7/PPP1R13L/TGFB1/DKK1/BVES/VEGFA/RGS4/TBX2/SOX9/BMP2/HIVEP3/DLL4/POPDC3/ARNTL/TBX3/FLNB/ALPK3/STRA6/FGF2/TPM1/MYOCD/MYOM3/CASQ1/ANKRD1/CXADR/EPHB1/NRG1/ACTC1/XIRP2/PDLIM5/HEYL/SHH/GREM1/CHD7/TCAP/NKX2-6/GJC1/DNER/MIR222/MIR17HG/SCX	48
GO:0043491	GO:0043491	protein kinase B signaling	34/1060	175/12280	5.30823e-06	0.000258977	0.000202622	IGF1/FGFR3/NOX4/RASD2/PDGFB/TGFB1/PIK3CG/CSF3/ADTRP/HBEGF/FGF1/EREG/SOX9/IL1B/SPRY2/FGF5/FGF2/EPHA2/PIK3R1/PTPRJ/FGF18/NRG1/XDH/RET/NKX3-1/OTUD3/PLK3/TNFAIP8L3/IRS2/PDGFA/MIR222/MIR221/MIR138-1/MIR29A	34
GO:0071222	GO:0071222	cellular response to lipopolysaccharide	28/1060	131/12280	5.40076e-06	0.000260857	0.000204092	TNFRSF1B/TNIP3/CXCL2/ICAM1/TGFB1/SERPINE1/MAPK8/CSF3/PPARD/TNFAIP3/CD274/CXCL6/IL1B/IRAK2/PTPN22/HAVCR2/IL6/ANKRD1/BMP6/NLRP3/IL24/CXCL3/CXCL5/CSF2/IL12A/CXCL8/TRIB1/PDE4B	28
GO:0030217	GO:0030217	T cell differentiation	31/1060	153/12280	5.59377e-06	0.000264881	0.000207241	RUNX3/PRDM1/CBFB/JMJD6/GLI2/IL4R/TCF7/NFATC2/SMAD7/TGFB1/CD83/VNN1/IL1RL2/DLL4/PTPN22/DOCK2/IL6/NFKBIZ/SH3RF1/RUNX1/NLRP3/SHH/IL12A/GPR183/CHD7/FZD8/EGR3/JAG2/TNFRSF18/CARD11/PNP	31
GO:0044706	GO:0044706	multi-multicellular organism process	31/1060	153/12280	5.59377e-06	0.000264881	0.000207241	PRDM1/PTGS2/EDN1/PTHLH/ANGPT2/TIMP1/TGFB1/CYP27B1/ARHGDIB/PPARD/PRLR/PGF/PTGFR/AGO2/IL1B/FOSB/LIF/ARNTL/ETS1/HAVCR2/STC1/ITGA5/ITGA2/GJB2/PSG6/JUNB/FOSL1/THBD/CLDN4/PSG7/PSG1	31
GO:1903037	GO:1903037	regulation of leukocyte cell-cell adhesion	36/1060	191/12280	5.84429e-06	0.000272603	0.000213282	IGF1/RUNX3/CBFB/GLI2/IL4R/ICAM1/SMAD7/TGFB1/CXCL12/ADTRP/CD83/VNN1/HES1/ITGA4/IL1RL2/NR4A3/CD274/IL1B/PTPN22/ETS1/HAVCR2/IL6/NFKBIZ/PIK3R1/RUNX1/NLRP3/CASP3/SHH/IL12A/HAS2/EGR3/CARD11/PNP/MIR222/MIR221/CD24	36
GO:1904018	GO:1904018	positive regulation of vasculature development	30/1060	146/12280	5.86971e-06	0.000272603	0.000213282	PTGS2/ANGPT2/HMOX1/PDGFB/HIF1A/FLT1/SERPINE1/VEGFA/FGF1/PGF/AGO2/IL1B/ETS1/FGF2/MYOCD/RHOB/ADAM12/HMGA2/VEGFC/FGF18/RUNX1/HK2/ITGA5/GREM1/ANGPTL4/CXCL8/SPHK1/FOXC2/GATA2/MIR29A	30
GO:1903039	GO:1903039	positive regulation of leukocyte cell-cell adhesion	29/1060	139/12280	6.10979e-06	0.000279795	0.000218909	IGF1/RUNX3/CBFB/GLI2/IL4R/ICAM1/TGFB1/CD83/VNN1/HES1/ITGA4/IL1RL2/NR4A3/CD274/IL1B/ETS1/HAVCR2/IL6/NFKBIZ/PIK3R1/RUNX1/NLRP3/SHH/IL12A/HAS2/EGR3/CARD11/PNP/CD24	29
GO:0061458	GO:0061458	reproductive system development	53/1060	329/12280	6.14044e-06	0.000279795	0.000218909	SOX8/ERCC1/BAK1/TNC/PRDM1/FSTL3/PTGS2/GLI2/TCF7/ICAM1/PDGFB/HIF1A/FNDC3A/BIRC2/CYP27B1/PPARD/VEGFA/PCDH12/HES1/INHBA/SNAI1/EREG/SOX9/LIF/VGF/ADAM19/TBX3/STRA6/BMPR1B/MYOCD/REN/RSPO3/BMP6/MMP14/STC1/CASP3/CSF2/HEY1/SHH/GJB2/E2F7/SPINT1/NKX3-1/JUNB/CHD7/ID4/FOSL1/UMODL1/ZFP42/GATA2/SOCS3/WNT7B/SCX	53
GO:0014706	GO:0014706	striated muscle tissue development	46/1060	271/12280	6.21295e-06	0.000280454	0.000219425	SOX8/JARID2/IGF1/EDN1/NOX4/DSP/ASB2/SMAD7/PPP1R13L/TGFB1/DKK1/BVES/VEGFA/RGS4/TBX2/BMP2/HIVEP3/DLL4/POPDC3/ARNTL/TBX3/FLNB/ALPK3/FGF2/TPM1/MYOCD/MYOM3/CASQ1/ANKRD1/CXADR/EPHB1/NRG1/ACTC1/XIRP2/PDLIM5/HEYL/SHH/GREM1/CHD7/TCAP/NKX2-6/GJC1/DNER/MIR222/MIR17HG/SCX	46
GO:2000146	GO:2000146	negative regulation of cell motility	39/1060	215/12280	6.32771e-06	0.000282989	0.000221408	TIE1/NAV3/ANGPT2/HMOX1/SMAD7/TIMP1/TGFB1/SERPINE1/CXCL12/GTPBP4/ARHGDIB/ADTRP/PPARD/DUSP1/DLL4/IL33/SEMA6D/FGF2/TPM1/MYOCD/RHOB/PTPRJ/PTPRR/NRG1/STC1/IL24/ADORA1/SHH/GREM1/MMRN2/TRIB1/MCTP1/C5orf30/TACSTD2/SRGAP1/MIR221/MIR138-1/EPPK1/MIR29A	39
GO:1904892	GO:1904892	regulation of STAT cascade	20/1060	78/12280	6.84111e-06	0.000303143	0.000237176	CRLF1/IGF1/FGFR3/DOT1L/PRLR/HES1/SOCS2/LIF/IL6/IL24/CSF2/RET/IL12A/CLCF1/CSF1R/SOCS3/IFNE/TNFRSF18/HES5/MIR221	20
GO:0061448	GO:0061448	connective tissue development	38/1060	208/12280	6.97942e-06	0.00030646	0.000239771	SOX8/RUNX3/FGFR3/GLI2/EDN1/PTHLH/PDGFB/HIF1A/TIMP1/TGFB1/COMP/PPARD/DLX2/SATB2/SNAI1/SOX9/BMP2/FGF2/BMPR1B/HMGA2/BMP6/FGF18/STC1/MSX1/NPPC/GREM1/CHST11/ID4/ESRRA/UMODL1/GPR4/CREB3L2/RFLNB/WNT7B/COL27A1/HES5/FOXD1/SCX	38
GO:0055007	GO:0055007	cardiac muscle cell differentiation	21/1060	85/12280	7.63586e-06	0.000332263	0.00025996	IGF1/EDN1/NOX4/TGFB1/DKK1/BVES/VEGFA/RGS4/BMP2/TBX3/ALPK3/MYOCD/MYOM3/CXADR/NRG1/ACTC1/PDLIM5/GREM1/TCAP/NKX2-6/MIR222	21
GO:0050678	GO:0050678	regulation of epithelial cell proliferation	43/1060	250/12280	8.8163e-06	0.000380203	0.000297467	IGF1/RUNX3/HMOX1/PDGFB/HIF1A/FLT1/TGFB1/CXCL12/PPARD/VEGFA/FGF1/HES1/ITGA4/ERRFI1/TNFAIP3/NR4A3/PGF/NR4A1/EREG/SOX9/BMP2/ID1/DLL4/FGF2/VEGFC/BMP6/XDH/TGFA/SHH/NKX3-1/ATOH8/MTSS1/HAS2/GATA2/EGR3/SCN5A/TACSTD2/HES5/MIR222/ITGB3/EPPK1/MMP12/MIR29A	43
GO:0051897	GO:0051897	positive regulation of protein kinase B signaling	25/1060	113/12280	8.99999e-06	0.00038469	0.000300978	FGFR3/NOX4/RASD2/PDGFB/TGFB1/PIK3CG/CSF3/HBEGF/FGF1/EREG/SPRY2/FGF5/FGF2/PIK3R1/PTPRJ/FGF18/NRG1/RET/TNFAIP8L3/IRS2/PDGFA/MIR222/MIR221/MIR138-1/MIR29A	25
GO:0043062	GO:0043062	extracellular structure organization	49/1060	300/12280	9.33344e-06	0.000395443	0.000309391	TNFRSF1B/VCAN/TNC/GPM6B/ELN/LAMC2/COL17A1/ICAM1/ITGA6/PDGFB/FERMT1/TIMP1/CRISPLD2/ERCC2/TGFB1/COMP/SERPINE1/VWF/ADTRP/ITGB6/ITGA4/COL10A1/SOX9/ETS1/ADAM19/FGF2/ITGA9/ADAM12/MMP3/MMP14/MYO1E/F11R/ADAMTS4/CARMIL2/ITGA5/ITGA2/SPINT1/MMP10/GREM1/HAS2/COL25A1/MMP1/COL27A1/LAMB3/PDGFA/ADAMTSL2/ITGB3/SCX/MMP12	49
GO:0042509	GO:0042509	regulation of tyrosine phosphorylation of STAT protein	15/1060	49/12280	9.47746e-06	0.000398053	0.000311433	CRLF1/IGF1/FGFR3/HES1/LIF/IL6/IL24/CSF2/IL12A/CLCF1/CSF1R/SOCS3/TNFRSF18/HES5/MIR221	15
GO:0048663	GO:0048663	neuron fate commitment	11/1060	28/12280	1.02011e-05	0.000424753	0.000332323	GLI2/HES1/DLX2/SATB2/DLL4/DLX1/NRG1/SHH/GATA2/JAG2/HES5	11
GO:0046683	GO:0046683	response to organophosphorus	23/1060	100/12280	1.0352e-05	0.000427351	0.000334355	PTGS2/P2RX5/NOX4/EZR/PIK3CG/AREG/BIRC2/DUSP1/IL1B/FOSB/RAP1B/VGF/HCN4/REN/PPARGC1B/STC1/JUNB/PDE3A/P2RY2/FOSL1/THBD/AKR1C1/SLC26A6	23
GO:0043542	GO:0043542	endothelial cell migration	33/1060	173/12280	1.0902e-05	0.000446242	0.000349135	PRSS3/MAP2K3/PTGS2/EDN1/PXN/ANGPT2/HMOX1/PDGFB/HIF1A/TGFB1/ADTRP/VEGFA/FGF1/NR4A1/ID1/DLL4/ETS1/FGF2/EPHA2/RHOB/VEGFC/FGF18/STC1/GREM1/ATOH8/PLEKHG5/MMRN2/FOXC2/GATA2/EGR3/MIR221/ITGB3/MIR29A	33
GO:0007565	GO:0007565	female pregnancy	28/1060	136/12280	1.14485e-05	0.000460804	0.000360529	PRDM1/PTGS2/PTHLH/ANGPT2/TIMP1/TGFB1/CYP27B1/ARHGDIB/PPARD/PRLR/PGF/AGO2/IL1B/FOSB/LIF/ETS1/HAVCR2/STC1/ITGA5/ITGA2/GJB2/PSG6/JUNB/FOSL1/THBD/CLDN4/PSG7/PSG1	28
GO:0071219	GO:0071219	cellular response to molecule of bacterial origin	28/1060	136/12280	1.14485e-05	0.000460804	0.000360529	TNFRSF1B/TNIP3/CXCL2/ICAM1/TGFB1/SERPINE1/MAPK8/CSF3/PPARD/TNFAIP3/CD274/CXCL6/IL1B/IRAK2/PTPN22/HAVCR2/IL6/ANKRD1/BMP6/NLRP3/IL24/CXCL3/CXCL5/CSF2/IL12A/CXCL8/TRIB1/PDE4B	28
GO:0051216	GO:0051216	cartilage development	31/1060	159/12280	1.26828e-05	0.000506265	0.000396097	RUNX3/FGFR3/GLI2/EDN1/PTHLH/HIF1A/TIMP1/TGFB1/COMP/DLX2/SATB2/SNAI1/SOX9/BMP2/FGF2/BMPR1B/HMGA2/BMP6/FGF18/STC1/MSX1/NPPC/GREM1/CHST11/ESRRA/CREB3L2/RFLNB/WNT7B/COL27A1/HES5/SCX	31
GO:0010634	GO:0010634	positive regulation of epithelial cell migration	26/1060	123/12280	1.4278e-05	0.000565267	0.000442259	MAP2K3/PTGS2/EDN1/HMOX1/PDGFB/HIF1A/TGFB1/VEGFA/HBEGF/FGF1/SOX9/ETS1/FGF2/RHOB/DOCK5/VEGFC/FGF18/ITGA2/ATOH8/HAS2/FOXC2/GATA2/MIR222/MIR221/ITGB3/MIR29A	26
GO:0030278	GO:0030278	regulation of ossification	29/1060	145/12280	1.44405e-05	0.000565681	0.000442584	IGF1/GPM6B/HIF1A/TGFB1/DKK1/AREG/CYP27B1/ID3/SOX9/BMP2/ID1/KREMEN2/IL6/SMAD6/BMPR1B/BMP6/ANKH/NPPC/GREM1/ADRB2/ID4/ESRRA/PHOSPHO1/RFLNB/WNT7B/OSTN/SMOC1/SMURF1/MIR138-1	29
GO:0043534	GO:0043534	blood vessel endothelial cell migration	23/1060	102/12280	1.46398e-05	0.000565681	0.000442584	MAP2K3/PTGS2/ANGPT2/HMOX1/PDGFB/HIF1A/TGFB1/ADTRP/VEGFA/NR4A1/ID1/DLL4/ETS1/FGF2/EPHA2/VEGFC/FGF18/GREM1/MMRN2/FOXC2/GATA2/EGR3/MIR221	23
GO:1902107	GO:1902107	positive regulation of leukocyte differentiation	23/1060	102/12280	1.46398e-05	0.000565681	0.000442584	RUNX3/CBFB/GLI2/IL4R/TGFB1/CD83/VNN1/IL1RL2/GPR68/LIF/NFKBIZ/KLF10/PPARGC1B/MMP14/RUNX1/NLRP3/SHH/DCSTAMP/IL12A/TRIB1/EGR3/EVI2B/PNP	23
GO:0072210	GO:0072210	metanephric nephron development	11/1060	29/12280	1.51597e-05	0.00058112	0.000454663	SOX8/PDGFB/HES1/SOX9/LIF/RET/GREM1/GDNF/HES5/FMN1/FOXD1	11
GO:0014013	GO:0014013	regulation of gliogenesis	20/1060	82/12280	1.53705e-05	0.000584561	0.000457355	SOX8/PRKCH/TGFB1/PITX3/HES1/DLX2/IL1B/BMP2/LIF/IL6/DLX1/SHH/SPINT1/GPR183/CDH2/ID4/CLCF1/HES5/MIR222/MIR221	20
GO:0007260	GO:0007260	tyrosine phosphorylation of STAT protein	15/1060	51/12280	1.62704e-05	0.000613955	0.000480353	CRLF1/IGF1/FGFR3/HES1/LIF/IL6/IL24/CSF2/IL12A/CLCF1/CSF1R/SOCS3/TNFRSF18/HES5/MIR221	15
GO:0099177	GO:0099177	regulation of trans-synaptic signaling	48/1060	298/12280	1.67766e-05	0.000628146	0.000491455	SYN1/SYT7/CAMK2B/PTGS2/CACNG4/EDN1/SLC1A3/RIMS1/ITPR3/GRIN2D/STX1A/APBA1/DKK1/KCNC4/RGS4/TSHZ3/IL1B/PRKCG/RAP1B/LRRC4/AKAP12/DLG4/NGF/EIF4E/PLCL2/EPHB1/DGKI/NTNG1/ADORA1/FABP5/NETO1/STX3/GDNF/RAB3B/ADRB2/KISS1/CDH2/PLEKHG5/CALB2/SYT12/NPAS4/MCTP1/RIMS2/GRID1/SYN3/ARC/SHANK3/NPAS4	48
GO:0048754	GO:0048754	branching morphogenesis of an epithelial tube	25/1060	117/12280	1.70725e-05	0.000630953	0.000493652	SOX8/TNC/GLI2/EDN1/TGFB1/AREG/VEGFA/FGF1/PGF/SOX9/BMP2/DLL4/TBX3/SPRY2/FGF2/EPHA2/MMP14/HHIP/SHH/GREM1/NKX3-1/GBX2/GDNF/TACSTD2/FOXD1	25
GO:0030282	GO:0030282	bone mineralization	19/1060	76/12280	1.71128e-05	0.000630953	0.000493652	IGF1/GPM6B/FGFR3/PTGS2/PTHLH/HIF1A/ERCC2/TGFB1/CYP27B1/SOX9/BMP2/BMPR1B/BMP6/ANKH/KLF10/GREM1/ADRB2/PHOSPHO1/RFLNB	19
GO:0045619	GO:0045619	regulation of lymphocyte differentiation	24/1060	110/12280	1.73305e-05	0.000634138	0.000496144	RUNX3/PRDM1/CBFB/GLI2/IL4R/NFATC2/SMAD7/TGFB1/CD83/VNN1/IL1RL2/INHBA/NFKBIZ/SH3RF1/MMP14/RUNX1/NLRP3/SHH/IL12A/EGR3/TNFRSF18/CARD11/PNP/MIR17HG	24
GO:0009612	GO:0009612	response to mechanical stimulus	30/1060	154/12280	1.77183e-05	0.000643456	0.000503434	BAK1/TNC/PTGS2/EDN1/SLC1A3/ANGPT2/BDKRB1/TNFRSF10A/TGFB1/CXCL12/MAPK8/ASIC2/SOX9/IL1B/FOSB/HABP4/ATP8A2/ETS1/STRA6/ANKRD1/BMP6/MMP14/PKD1L1/ITGA2/CRADD/JUNB/TCAP/FOSL1/SHANK3/SCX	30
GO:0010632	GO:0010632	regulation of epithelial cell migration	34/1060	185/12280	1.83955e-05	0.000663061	0.000518773	MAP2K3/PTGS2/EDN1/ANGPT2/HMOX1/PDGFB/HIF1A/TGFB1/VEGFA/HBEGF/FGF1/SOX9/DLL4/ETS1/FGF2/EPHA2/RHOB/DOCK5/VEGFC/PTPRR/FGF18/STC1/ITGA2/ATOH8/HAS2/MMRN2/FOXC2/GATA2/TACSTD2/MIR222/MIR221/ITGB3/EPPK1/MIR29A	34
GO:0030949	GO:0030949	positive regulation of vascular endothelial growth factor receptor signaling pathway	7/1060	12/12280	1.88179e-05	0.000668311	0.000522881	HIF1A/FLT1/VEGFA/IL1B/FGF18/ITGA5/ITGB3	7
GO:0050855	GO:0050855	regulation of B cell receptor signaling pathway	7/1060	12/12280	1.88179e-05	0.000668311	0.000522881	PRKCH/CBFB/LPXN/PTPN22/PLCL2/RUNX1/SLC39A10	7
GO:0071396	GO:0071396	cellular response to lipid	64/1060	439/12280	1.98019e-05	0.000698126	0.000546207	TNFRSF1B/TNC/TNIP3/CBFB/EDN1/CXCL2/ICAM1/TGFB1/SERPINE1/MAPK8/CSF3/CYP27B1/ADTRP/PPARD/NR3C1/ERRFI1/NR5A2/ID3/TNFAIP3/NR4A3/CD274/PTGFR/INHBA/NR4A1/PMEPA1/CXCL6/SOX9/IL1B/CCDC62/ARNTL/IRAK2/PTPN22/HAVCR2/IL6/SSTR1/NPC1/ABL2/MSN/ANKRD1/EIF4E/BMP6/PPARGC1B/GRIP1/STC1/RUNX1/NLRP3/IL24/CXCL3/CXCL5/HEYL/ITGA2/CSF2/GJB2/RET/NKX3-1/IL12A/CXCL8/ESRRA/TRIB1/NPAS4/PDE4B/WNT7B/NCOR2/NPAS4	64
GO:0048660	GO:0048660	regulation of smooth muscle cell proliferation	24/1060	111/12280	2.03349e-05	0.000711722	0.000556844	IGF1/PTGS2/EDN1/HMOX1/PDGFB/PPARD/HBEGF/TNFAIP3/NR4A3/EREG/CNN1/IL6/FGF2/TPM1/MYOCD/NPPC/ITGA2/IL12A/TRIB1/ERN1/HES5/TGM2/MIR222/MIR221	24
GO:0043405	GO:0043405	regulation of MAP kinase activity	44/1060	267/12280	2.10772e-05	0.000732393	0.000573018	IGF1/MAP2K3/EDN1/NOX4/GADD45B/PDGFB/FLT1/TGFB1/PIK3CG/DKK1/VEGFA/FGF1/RGS4/DUSP1/DUSP4/IL1B/BMP2/GADD45G/IRAK2/PTPN22/NGF/SPRY2/DUSP5/FGF2/RGS3/PTPRJ/FGF18/NRG1/DUSP2/TGFA/ADORA1/NEK10/PRKCD/DUSP7/RET/MLKL/TRIB1/CSPG4/FZD8/ERN1/SPRY4/WNT7B/PDGFA/CD24	44
GO:0090257	GO:0090257	regulation of muscle system process	31/1060	164/12280	2.40674e-05	0.000830326	0.000649639	JARID2/IGF1/TNFRSF1B/CAMK2B/ATP2B4/LMCD1/PTGS2/EDN1/DSP/SMAD7/PIK3CG/SGCA/TACR1/ERRFI1/RGS4/NR4A3/CNN1/HCN4/TPM1/MYOCD/CASQ1/DOCK5/GSTO1/STC1/ADORA1/ITGA2/ADRB2/SPHK1/SCN5A/PDE4B/MIR17HG	31
GO:0001658	GO:0001658	branching involved in ureteric bud morphogenesis	13/1060	41/12280	2.44209e-05	0.000836544	0.000654505	SOX8/TGFB1/VEGFA/FGF1/PGF/SOX9/BMP2/FGF2/SHH/GREM1/GDNF/TACSTD2/FOXD1	13
GO:0042113	GO:0042113	B cell activation	29/1060	149/12280	2.47566e-05	0.000842074	0.000658831	ERCC1/POU2F2/BAK1/LAT2/IL11/NFATC2/LYL1/IL27RA/TGFB1/ITGA4/TNFAIP3/INHBA/DOCK10/IL6/LRRC8A/PIK3R1/PTPRJ/PLCL2/MMP14/PRKCD/CASP3/GPR183/CTPS1/CLCF1/IFNE/IRS2/SLC39A10/CARD11/MIR17HG	29
GO:0001649	GO:0001649	osteoblast differentiation	32/1060	172/12280	2.49378e-05	0.000842306	0.000659013	SOX8/IGF1/VCAN/TNC/CBFB/GLI2/PTHLH/GTPBP4/AREG/ID3/SATB2/SNAI1/BMP2/ID1/MYBBP1A/IL6/SMAD6/SEMA7A/BMPR1B/EPHA2/BMP6/NPPC/SHH/DDX21/GREM1/JUNB/ID4/ESRRA/WNT7B/OSTN/SMOC1/MIR138-1	32
GO:0033002	GO:0033002	muscle cell proliferation	30/1060	157/12280	2.61195e-05	0.000876091	0.000685445	JARID2/IGF1/PTGS2/EDN1/HMOX1/PDGFB/PPARD/HBEGF/TNFAIP3/NR4A3/TBX2/EREG/CNN1/IL6/FGF2/TPM1/MYOCD/CXADR/EPHB1/NPPC/ITGA2/SHH/IL12A/TRIB1/ERN1/HES5/TGM2/MIR222/MIR221/MIR17HG	30
GO:0042476	GO:0042476	odontogenesis	20/1060	85/12280	2.70758e-05	0.000901904	0.000705641	TNC/GLI2/EDN1/ITGA6/TGFB1/SERPINE1/DLX2/ID3/INHBA/SSUH2/BMP2/ENAM/DLX1/CNNM4/MSX1/SHH/ODAPH/SCN5A/JAG2/SP6	20
GO:0048659	GO:0048659	smooth muscle cell proliferation	24/1060	113/12280	2.77935e-05	0.000915516	0.000716291	IGF1/PTGS2/EDN1/HMOX1/PDGFB/PPARD/HBEGF/TNFAIP3/NR4A3/EREG/CNN1/IL6/FGF2/TPM1/MYOCD/NPPC/ITGA2/IL12A/TRIB1/ERN1/HES5/TGM2/MIR222/MIR221	24
GO:0045580	GO:0045580	regulation of T cell differentiation	21/1060	92/12280	2.80531e-05	0.000915516	0.000716291	RUNX3/PRDM1/CBFB/GLI2/IL4R/NFATC2/SMAD7/TGFB1/CD83/VNN1/IL1RL2/NFKBIZ/SH3RF1/RUNX1/NLRP3/SHH/IL12A/EGR3/TNFRSF18/CARD11/PNP	21
GO:0046834	GO:0046834	lipid phosphorylation	21/1060	92/12280	2.80531e-05	0.000915516	0.000716291	FGFR3/DGKD/EFR3B/PDGFB/CERK/DGKH/PIK3CG/HBEGF/FGF1/SOCS2/EREG/FGF5/FGF2/PIK3R1/FGF18/NRG1/DGKI/SPHK1/SOCS3/IRS2/PDGFA	21
GO:0003006	GO:0003006	developmental process involved in reproduction	67/1060	471/12280	2.8284e-05	0.000916859	0.000717342	SOX8/ERCC1/IGF1/BAK1/NSUN2/TNC/PRDM1/FSTL3/PTGS2/GLI2/TCF7/ICAM1/ANGPT2/PDGFB/HIF1A/FNDC3A/TGFB1/AREG/BIRC2/CYP27B1/PPARD/VEGFA/PCDH12/HES1/CHD5/INHBA/SNAI1/EREG/SOX9/LIF/VGF/ADAM19/TBX3/PAQR5/STRA6/BMPR1B/MYOCD/TAF4B/REN/RSPO3/BMP6/MMP14/STC1/NPPC/CASP3/CSF2/HEY1/SHH/GJB2/E2F7/SPINT1/NKX3-1/MEI1/JUNB/CHD7/ID4/PDE3A/FOSL1/UMODL1/ZFP42/GATA2/MEIOC/SOCS3/OSBP2/WNT7B/SLC26A6/SCX	67
GO:0042063	GO:0042063	gliogenesis	36/1060	205/12280	2.95106e-05	0.000950241	0.00074346	SOX8/CD9/PRKCH/HDAC10/ERCC2/TGFB1/PITX3/AREG/HES1/DLX2/SOX9/IL1B/BMP2/LIF/TRPC4/TSPAN2/IL6/IL33/FGF5/DLX1/NRG1/MMP14/SHH/SPINT1/GPR183/CDH2/ID4/CSPG4/NRROS/CLCF1/GPR157/DNER/HES5/MIR222/MIR221/ZNF488	36
GO:0009913	GO:0009913	epidermal cell differentiation	26/1060	128/12280	2.98091e-05	0.000953496	0.000746006	PRKCH/SLC4A7/USH2A/CBFB/PKP1/DSP/ERCC2/CYP27B1/HES1/ERRFI1/EREG/KRT33B/FLNB/EPHA2/RUNX1/CASP3/KRT15/JAG2/KRT79/LCE2A/LCE2C/KRTAP1-1/HES5/KRT81/KRTAP4-9/KRTAP2-3	26
GO:0050679	GO:0050679	positive regulation of epithelial cell proliferation	28/1060	143/12280	3.03133e-05	0.000956602	0.000748437	IGF1/HMOX1/PDGFB/HIF1A/TGFB1/CXCL12/VEGFA/FGF1/ITGA4/TNFAIP3/NR4A3/PGF/NR4A1/SOX9/BMP2/ID1/FGF2/VEGFC/BMP6/TGFA/SHH/HAS2/GATA2/EGR3/SCN5A/ITGB3/MMP12/MIR29A	28
GO:0051271	GO:0051271	negative regulation of cellular component movement	41/1060	246/12280	3.05004e-05	0.000956602	0.000748437	CD9/TIE1/NAV3/ANGPT2/HMOX1/SMAD7/TIMP1/TGFB1/SERPINE1/CXCL12/GTPBP4/ARHGDIB/ADTRP/PPARD/DUSP1/DLL4/IL33/SEMA6D/SEMA7A/FGF2/TPM1/MYOCD/RHOB/PTPRJ/PTPRR/NRG1/STC1/IL24/ADORA1/SHH/GREM1/MMRN2/TRIB1/MCTP1/C5orf30/TACSTD2/SRGAP1/MIR221/MIR138-1/EPPK1/MIR29A	41
GO:0060562	GO:0060562	epithelial tube morphogenesis	41/1060	246/12280	3.05004e-05	0.000956602	0.000748437	SOX8/TNC/GLI2/EDN1/HIF1A/TGFB1/AREG/VEGFA/FGF1/HES1/PGF/TBX2/SOX9/VASP/BMP2/WNK4/PODXL/DLL4/MICAL2/TBX3/SPRY2/FGF2/EPHA2/LMO4/RHOB/MMP14/HHIP/SHH/RET/SPINT1/GREM1/NKX3-1/GBX2/GDNF/MTSS1/TCAP/CSF1R/TACSTD2/HES5/FMN1/FOXD1	41
GO:0070661	GO:0070661	leukocyte proliferation	31/1060	166/12280	3.07889e-05	0.000959422	0.000750643	IGF1/GAL/NFATC2/TGFB1/PIK3CG/HES1/TNFAIP3/CD274/IL1B/PTPN22/DOCK2/HAVCR2/IL6/IL33/MSN/SH3RF1/PLCL2/PRKCD/CASP3/SHH/GREM1/IL12A/GPR183/CTPS1/CLCF1/IFNE/IRS2/SLC39A10/CARD11/PNP/CD24	31
GO:0002685	GO:0002685	regulation of leukocyte migration	25/1060	121/12280	3.12223e-05	0.000966689	0.000756329	EDN1/ICAM1/HMOX1/BDKRB1/TGFB1/SERPINE1/CXCL12/CCL7/ADTRP/VEGFA/CCL20/ITGA4/PGF/DUSP1/IL6/IL33/MSN/VEGFC/MMP14/ADORA1/ITGA2/GREM1/IL12A/CXCL8/TNFRSF18	25
GO:0097529	GO:0097529	myeloid leukocyte migration	24/1060	114/12280	3.23783e-05	0.000994853	0.000778364	EDN1/CXCL2/PDGFB/FLT1/PIK3CG/SERPINE1/CXCL12/CCL7/VEGFA/CCL20/PGF/DUSP1/CXCL6/IL1B/IL6/ITGA9/VEGFC/CXADR/MMP14/CXCL3/CXCL5/GREM1/CXCL8/PDE4B	24
GO:0050804	GO:0050804	modulation of chemical synaptic transmission	47/1060	297/12280	3.25439e-05	0.000994853	0.000778364	SYN1/SYT7/CAMK2B/PTGS2/CACNG4/EDN1/SLC1A3/RIMS1/ITPR3/GRIN2D/STX1A/APBA1/DKK1/KCNC4/RGS4/TSHZ3/IL1B/PRKCG/RAP1B/LRRC4/AKAP12/DLG4/NGF/EIF4E/PLCL2/EPHB1/DGKI/NTNG1/ADORA1/NETO1/STX3/GDNF/RAB3B/ADRB2/KISS1/CDH2/PLEKHG5/CALB2/SYT12/NPAS4/MCTP1/RIMS2/GRID1/SYN3/ARC/SHANK3/NPAS4	47
GO:0042110	GO:0042110	T cell activation	46/1060	289/12280	3.39687e-05	0.00103188	0.000807332	IGF1/RUNX3/PRDM1/CBFB/JMJD6/GLI2/IL4R/TCF7/ICAM1/NFATC2/SMAD7/TGFB1/PIK3CG/CD83/VNN1/PRLR/HES1/IL1RL2/CD274/IL1B/DLL4/PTPN22/DOCK2/HAVCR2/IL6/NFKBIZ/PIK3R1/MSN/SH3RF1/CXADR/RUNX1/NLRP3/CASP3/SHH/IL12A/GPR183/CHD7/CTPS1/FZD8/EGR3/JAG2/IFNE/TNFRSF18/CARD11/PNP/CD24	46
GO:0042481	GO:0042481	regulation of odontogenesis	8/1060	17/12280	3.59436e-05	0.00107831	0.000843658	EDN1/TGFB1/BMP2/ENAM/MSX1/SHH/ODAPH/SP6	8
GO:0048799	GO:0048799	animal organ maturation	8/1060	17/12280	3.59436e-05	0.00107831	0.000843658	IGF1/FGFR3/XYLT1/BMP2/RET/GREM1/PHOSPHO1/RFLNB	8
GO:0030509	GO:0030509	BMP signaling pathway	22/1060	101/12280	3.94497e-05	0.00117618	0.000920236	FSTL3/SMAD7/DKK1/HES1/SMAD9/BMP2/ID1/SKIL/SMAD6/BMPR1B/DLX1/BMP6/MSX1/GREM1/HTRA3/RGMB/GREM2/FAM83G/HES5/SMURF1/FOXD1/SCX	22
GO:0050867	GO:0050867	positive regulation of cell activation	36/1060	208/12280	4.06282e-05	0.00120389	0.000941914	IGF1/RUNX3/CBFB/GLI2/IL4R/NFATC2/TGFB1/CD83/VNN1/HES1/IL1RL2/IL1RL1/RPS6KA1/NR4A3/CD274/IL1B/HAVCR2/IL6/IL33/NFKBIZ/PIK3R1/MMP14/RUNX1/NLRP3/SHH/IL12A/GPR183/CLCF1/GATA2/EGR3/FAM19A3/IRS2/SLC39A10/CARD11/PNP/CD24	36
GO:0001656	GO:0001656	metanephros development	16/1060	61/12280	4.14615e-05	0.00121283	0.000948907	SOX8/PDGFB/HES1/ID3/SOX9/LIF/SHH/RET/GREM1/NKX3-1/GDNF/WNT7B/PDGFA/HES5/FMN1/FOXD1	16
GO:1903670	GO:1903670	regulation of sprouting angiogenesis	16/1060	61/12280	4.14615e-05	0.00121283	0.000948907	PTGS2/HMOX1/VEGFA/FGF1/KLF2/DLL4/CEMIP2/FGF2/ITGA5/MMRN2/FOXC2/GATA2/MIR377/MIR222/MIR221/MIR138-1	16
GO:0030595	GO:0030595	leukocyte chemotaxis	25/1060	123/12280	4.16832e-05	0.00121283	0.000948907	EDN1/CXCL2/PDGFB/FLT1/PIK3CG/SERPINE1/CXCL12/CCL7/VEGFA/CCL20/PGF/DUSP1/CXCL6/IL1B/IL6/ITGA9/VEGFC/CXADR/CXCL3/CXCL5/GREM1/IL12A/CXCL8/GPR183/PDE4B	25
GO:0001890	GO:0001890	placenta development	24/1060	116/12280	4.36418e-05	0.00125654	0.000983109	PRDM1/PTGS2/PDGFB/HIF1A/BIRC2/CYP27B1/PPARD/PCDH12/HES1/SNAI1/LIF/ADAM19/RSPO3/STC1/CSF2/HEY1/GJB2/E2F7/SPINT1/JUNB/FOSL1/GATA2/SOCS3/WNT7B	24
GO:0048568	GO:0048568	embryonic organ development	48/1060	309/12280	4.37059e-05	0.00125654	0.000983109	ERCC1/PRDM1/GLI2/EDN1/TCF7/PDGFB/HIF1A/PPP1R13L/ERCC2/TGFB1/SH2B3/VEGFA/PCDH12/HES1/DLX2/ID3/SATB2/NR4A3/TBX2/SNAI1/SOX9/LIF/ATP8A2/MICAL2/TBX3/SPRY2/STRA6/EPHA2/RSPO3/MMP14/MSX1/CSF2/HEY1/SHH/E2F7/SPINT1/GBX2/GDNF/CXCL8/JUNB/CHST11/CHD7/TCAP/GATA2/NKX2-6/SOCS3/WNT7B/PDGFA	48
GO:0003015	GO:0003015	heart process	31/1060	169/12280	4.40981e-05	0.00126032	0.000986061	MAP2K3/ATP2B4/EDN1/NOX4/ITPR3/DSP/KCNK6/SMAD7/PPP1R13L/PIK3CG/BVES/HBEGF/RGS4/TBX2/HCN4/TPM1/CASQ1/GSTO1/CXADR/ATP2B2/STC1/ACTC1/NPPC/ADORA1/KCNK3/HSPB7/TCAP/DES/GJC1/SCN5A/PDE4B	31
GO:0033627	GO:0033627	cell adhesion mediated by integrin	14/1060	49/12280	4.44658e-05	0.00126335	0.000988436	ICAM1/FERMT1/PIK3CG/SERPINE1/LPXN/ITGB6/PODXL/EPHA2/FERMT3/ITGA5/ITGA2/RET/FOXC2/ITGB3	14
GO:0003338	GO:0003338	metanephros morphogenesis	9/1060	22/12280	4.54544e-05	0.00127647	0.0009987	SOX8/HES1/SOX9/LIF/GREM1/GDNF/WNT7B/HES5/FMN1	9
GO:0002696	GO:0002696	positive regulation of leukocyte activation	35/1060	201/12280	4.54561e-05	0.00127647	0.0009987	IGF1/RUNX3/CBFB/GLI2/IL4R/NFATC2/TGFB1/CD83/VNN1/HES1/IL1RL2/IL1RL1/NR4A3/CD274/IL1B/HAVCR2/IL6/IL33/NFKBIZ/PIK3R1/MMP14/RUNX1/NLRP3/SHH/IL12A/GPR183/CLCF1/GATA2/EGR3/FAM19A3/IRS2/SLC39A10/CARD11/PNP/CD24	35
GO:0010595	GO:0010595	positive regulation of endothelial cell migration	20/1060	88/12280	4.6195e-05	0.00128972	0.00100907	MAP2K3/PTGS2/EDN1/HMOX1/PDGFB/HIF1A/TGFB1/VEGFA/FGF1/ETS1/FGF2/RHOB/VEGFC/FGF18/ATOH8/FOXC2/GATA2/MIR221/ITGB3/MIR29A	20
GO:0003231	GO:0003231	cardiac ventricle development	21/1060	95/12280	4.66531e-05	0.00129503	0.00101322	PRDM1/DSP/HIF1A/SMAD7/PPP1R13L/TGFB1/HES1/DLL4/TBX3/SMAD6/STRA6/TPM1/MYOCD/LMO4/NRG1/XIRP2/HEYL/HEY1/CHD7/SCN5A/MIR17HG	21
GO:0060047	GO:0060047	heart contraction	30/1060	162/12280	4.84289e-05	0.00133664	0.00104577	MAP2K3/ATP2B4/EDN1/ITPR3/DSP/KCNK6/SMAD7/PPP1R13L/PIK3CG/BVES/HBEGF/RGS4/TBX2/HCN4/TPM1/CASQ1/GSTO1/CXADR/ATP2B2/STC1/ACTC1/NPPC/ADORA1/KCNK3/HSPB7/TCAP/DES/GJC1/SCN5A/PDE4B	30
GO:1903706	GO:1903706	regulation of hemopoiesis	47/1060	302/12280	4.99294e-05	0.00137022	0.00107205	RUNX3/PRDM1/CBFB/FSTL3/GLI2/IL4R/HIF1A/NFATC2/SMAD7/TGFB1/CSF3/CD83/VNN1/HES1/IL1RL2/NR4A3/GPR68/INHBA/LIF/ETS1/NFKBIZ/PIK3R1/UBASH3B/SH3RF1/KLF10/PPARGC1B/MMP14/RUNX1/NLRP3/CSF2/SHH/DCSTAMP/IL12A/KLF13/ESRRA/TRIB1/GATA2/EGR3/EVI2B/TNFRSF18/SIGLEC15/HES5/CARD11/PNP/MIR222/MIR221/MIR17HG	47
GO:0048771	GO:0048771	tissue remodeling	24/1060	117/12280	5.04984e-05	0.00137257	0.00107389	SYT7/BAK1/NOX4/HIF1A/TIMP1/TGFB1/TNFAIP3/LIF/DLL4/IL6/EPHA2/RSPO3/UBASH3B/PPARGC1B/MMP14/DCSTAMP/GREM1/ADRB2/CHD7/CSPG4/CSF1R/SIGLEC15/TGM2/ITGB3	24
GO:0048589	GO:0048589	developmental growth	69/1060	498/12280	5.05833e-05	0.00137257	0.00107389	TNFRSF12A/JARID2/ERCC1/IGF1/TNC/FSTL4/FGFR3/GAL/GLI2/MAP2/EDN1/RIMS1/NRCAM/EZR/PPP1R13L/ERCC2/TGFB1/COMP/APBA1/CXCL12/SGCA/AREG/ZPR1/PPARD/VEGFA/FGF1/WWC1/TTL/ITGA4/RGS4/SOCS2/TBX2/CPNE5/EREG/SOX9/KLF2/PTPN12/ATP8A2/LARGE1/NGF/SPRY2/STRA6/SEMA6D/SEMA7A/FGF2/BMPR1B/CXADR/AUTS2/STC1/DRAXIN/PDLIM5/NPPC/SHH/ISLR2/ADRB2/CHST11/CHD7/RAPH1/RIMS2/WNT7B/OSTN/COL27A1/DIO3/SMURF1/MIR222/MIR17HG/FMN1/SHANK3/…	69
GO:0048863	GO:0048863	stem cell differentiation	29/1060	155/12280	5.29944e-05	0.00142996	0.00111879	MEOX1/SOX8/JARID2/CBFB/EDN1/HIF1A/ERCC2/HES1/TBX2/SOX9/LIF/SEMA6D/SEMA7A/MYOCD/HMGA2/NRG1/RUNX1/ZNF281/MSX1/KBTBD8/SHH/RET/GREM1/GBX2/GDNF/GATA2/TACSTD2/SHC4/HES5	29
GO:0014910	GO:0014910	regulation of smooth muscle cell migration	15/1060	56/12280	5.49973e-05	0.00147576	0.00115462	IGF1/NOX4/PDGFB/SERPINE1/PPARD/NR4A3/SEMA6D/TPM1/MYOCD/DOCK5/ITGA2/HAS2/TRIB1/PDGFA/MIR221	15
GO:0048812	GO:0048812	neuron projection morphogenesis	69/1060	500/12280	5.74529e-05	0.00153314	0.00119951	TNFRSF12A/NRXN3/FSTL4/CAMK2B/NGEF/CRMP1/PICALM/GLI2/PLXNA2/RAP1GAP/MAP2/RIMS1/EPB41L3/NRCAM/EZR/DOK5/CXCL12/CAPRIN2/VEGFA/TTL/ITGA4/SGK1/NR4A3/PACSIN1/CPNE5/VASP/ID1/MAP1S/DLG4/ATP8A2/NUMB/NGF/DOCK10/SKIL/SEMA6D/SPTBN5/MYPN/SEMA7A/BMPR1B/PIK3R1/SHC3/EPHB1/GRIP1/AUTS2/ZSWIM5/DRAXIN/NTNG1/PDLIM5/SHH/DRGX/RET/ISLR2/GBX2/GDNF/IL1RAPL1/B3GNT2/CDH2/RAPH1/FBXO45/RIMS2/CSF1R/IRS2/WNT7B/COL25A1/OSTN/ARC/S…	69
GO:0035051	GO:0035051	cardiocyte differentiation	23/1060	111/12280	6.10199e-05	0.00161232	0.00126146	IGF1/EDN1/NOX4/TGFB1/DKK1/BVES/VEGFA/HES1/RGS4/TBX2/BMP2/TBX3/ALPK3/MYOCD/MYOM3/CXADR/NRG1/ACTC1/PDLIM5/GREM1/TCAP/NKX2-6/MIR222	23
GO:0030195	GO:0030195	negative regulation of blood coagulation	11/1060	33/12280	6.14216e-05	0.00161232	0.00126146	CD9/PLAUR/EDN1/PDGFB/SERPINE1/ADTRP/UBASH3B/PRKCD/THBD/PDGFA/SERPINB2	11
GO:1900047	GO:1900047	negative regulation of hemostasis	11/1060	33/12280	6.14216e-05	0.00161232	0.00126146	CD9/PLAUR/EDN1/PDGFB/SERPINE1/ADTRP/UBASH3B/PRKCD/THBD/PDGFA/SERPINB2	11
GO:0034762	GO:0034762	regulation of transmembrane transport	53/1060	357/12280	6.23676e-05	0.00162333	0.00127008	IGF1/KCNG1/ATP2B4/GAL/CACNG4/EDN1/ABCB1/KCNK6/BDKRB1/KCNA7/TGFB1/PIK3CG/TSPAN13/PPIF/ASIC2/KCNC4/RGS4/NR4A3/IL1B/WNK4/DIAPH1/DLG4/HCN4/STAC2/CASQ1/PIK3R1/GSTO1/KCNK13/UBASH3B/KCNMA1/KCNS2/KCNJ15/HK2/LRRC38/KCNF1/FABP5/GEM/NETO1/RRAD/ADRB2/CLIC3/KCNS3/CHD7/PDZK1/SCN5A/PDE4B/KCNQ5/IRS2/OSTN/ARC/MIR103A2/SLC26A6/SHANK3	53
GO:0007162	GO:0007162	negative regulation of cell adhesion	34/1060	196/12280	6.28494e-05	0.00162333	0.00127008	CD9/RUNX3/TNC/CBFB/PLXNA2/IL4R/ANGPT2/SMAD7/TGFB1/SERPINE1/CXCL12/GTPBP4/LPXN/ARHGDIB/ADTRP/DUSP1/CD274/BMP2/PODXL/PTPN22/HAVCR2/PIK3R1/UBASH3B/MMP14/RUNX1/PRKCD/CASP3/SHH/TACSTD2/MIR222/MIR221/MIR138-1/ARHGDIG/MMP12	34
GO:0097191	GO:0097191	extrinsic apoptotic signaling pathway	34/1060	196/12280	6.28494e-05	0.00162333	0.00127008	TNFRSF12A/IGF1/TNFRSF1B/BAK1/FGFR3/ICAM1/ITGA6/TIMP3/HMOX1/TNFRSF10A/TGFB1/SERPINE1/FASLG/TNFAIP3/INHBA/G0S2/IL1B/NGF/SKIL/IL33/BMPR1B/BCL2A1/MCL1/PIK3R1/SH3RF1/CASP3/CSF2/RET/GDNF/IL12A/CRADD/MIR222/MIR221/MLLT11	34
GO:0060394	GO:0060394	negative regulation of pathway-restricted SMAD protein phosphorylation	6/1060	10/12280	6.32055e-05	0.00162366	0.00127033	SMAD7/DKK1/SNX25/PMEPA1/SMAD6/GREM1	6
GO:0014909	GO:0014909	smooth muscle cell migration	16/1060	63/12280	6.35344e-05	0.00162366	0.00127033	IGF1/NOX4/PDGFB/SERPINE1/PPARD/NR4A3/SEMA6D/TPM1/MYOCD/DOCK5/ITGA2/HAS2/TRIB1/PDGFA/MIR221/ITGB3	16
GO:0007259	GO:0007259	JAK-STAT cascade	20/1060	90/12280	6.48772e-05	0.00164061	0.0012836	CRLF1/IGF1/FGFR3/DOT1L/PRLR/HES1/SOCS2/LIF/IL6/IL24/CSF2/RET/IL12A/CLCF1/CSF1R/SOCS3/IFNE/TNFRSF18/HES5/MIR221	20
GO:0030216	GO:0030216	keratinocyte differentiation	20/1060	90/12280	6.48772e-05	0.00164061	0.0012836	PRKCH/CBFB/PKP1/DSP/CYP27B1/ERRFI1/EREG/KRT33B/FLNB/EPHA2/RUNX1/CASP3/KRT15/KRT79/LCE2A/LCE2C/KRTAP1-1/KRT81/KRTAP4-9/KRTAP2-3	20
GO:0001935	GO:0001935	endothelial cell proliferation	24/1060	119/12280	6.71772e-05	0.00168993	0.00132218	HMOX1/PDGFB/HIF1A/FLT1/CXCL12/VEGFA/ITGA4/PGF/NR4A1/BMP2/DLL4/FGF2/EPHA2/VEGFC/BMP6/MMP14/XDH/ATOH8/ERN1/GATA2/EGR3/MIR222/ITGB3/MIR29A	24
GO:0045582	GO:0045582	positive regulation of T cell differentiation	15/1060	57/12280	6.87602e-05	0.00172079	0.00134633	RUNX3/CBFB/GLI2/IL4R/TGFB1/CD83/VNN1/IL1RL2/NFKBIZ/RUNX1/NLRP3/SHH/IL12A/EGR3/PNP	15
GO:0010720	GO:0010720	positive regulation of cell development	59/1060	412/12280	6.98266e-05	0.00172985	0.00135342	SOX8/TNFRSF12A/IGF1/CNTN1/PRKCH/CAMK2B/GLI2/PLXNA2/EDN1/RIMS1/NRCAM/HIF1A/TGFB1/CXCL12/DKK1/CAPRIN2/VEGFA/HES1/DLX2/GPR68/SOCS2/PACSIN1/CPNE5/IL1B/BMP2/LIF/DLG4/ATP8A2/NUMB/NGF/IL6/SKIL/SEMA7A/ABL2/DLX1/DOCK5/ANKRD1/VEGFC/BMP6/GRIP1/HEYL/SHH/RET/SPINT1/ISLR2/IL1RAPL1/LIMS1/HAS2/PDE3A/TRIB1/CLCF1/RIMS2/GATA2/CREB3L2/SMURF1/MIR222/MIR221/TENM3/SHANK3	59
GO:0070977	GO:0070977	bone maturation	7/1060	14/12280	6.98386e-05	0.00172985	0.00135342	IGF1/FGFR3/XYLT1/BMP2/GREM1/PHOSPHO1/RFLNB	7
GO:0043536	GO:0043536	positive regulation of blood vessel endothelial cell migration	14/1060	51/12280	7.22855e-05	0.00178132	0.00139369	MAP2K3/PTGS2/HMOX1/PDGFB/HIF1A/TGFB1/VEGFA/ETS1/FGF2/VEGFC/FGF18/FOXC2/GATA2/MIR221	14
GO:0055008	GO:0055008	cardiac muscle tissue morphogenesis	13/1060	45/12280	7.30477e-05	0.00179097	0.00140124	DSP/SMAD7/TGFB1/BMP2/DLL4/TPM1/MYOM3/ANKRD1/NRG1/ACTC1/XIRP2/CHD7/TCAP	13
GO:1903522	GO:1903522	regulation of blood circulation	30/1060	166/12280	7.74038e-05	0.00188818	0.0014773	ATP2B4/PTGS2/EDN1/ICAM1/ITPR3/DSP/KCNK6/SMAD7/PIK3CG/ASIC2/BVES/HBEGF/RGS4/TBX2/HCN4/TPM1/CASQ1/DOCK5/GSTO1/CXADR/ATP2B2/STC1/NPPC/ADORA1/KCNK3/HSPB7/DES/GJC1/SCN5A/PDE4B	30
GO:0061564	GO:0061564	axon development	57/1060	396/12280	8.00864e-05	0.00194381	0.00152082	TNFRSF12A/NRXN3/TNC/FSTL4/CRMP1/PICALM/GLI2/PLXNA2/RAP1GAP/MAP2/NRCAM/EZR/DOK5/NEFM/CXCL12/ZPR1/VEGFA/TTL/ITGA4/NR4A3/VASP/MAP1S/ATP8A2/NUMB/TSPAN2/NGF/SKIL/SEMA6D/SPTBN5/MYPN/SEMA7A/BMPR1B/PIK3R1/SHC3/EPHB1/AUTS2/ZSWIM5/DRAXIN/NTNG1/CASP3/SHH/DRGX/RET/ISLR2/GBX2/GDNF/B3GNT2/CDH2/RAPH1/FBXO45/CSF1R/IRS2/COL25A1/MIR222/MIR221/SHANK3/FOXD1	57
GO:0002694	GO:0002694	regulation of leukocyte activation	48/1060	317/12280	8.38222e-05	0.00202431	0.0015838	IGF1/RUNX3/PRDM1/CBFB/GAL/GLI2/IL4R/HMOX1/NFATC2/SMAD7/IL27RA/TGFB1/CD83/VNN1/HES1/IL1RL2/IL1RL1/TNFAIP3/NR4A3/CD274/INHBA/IL13RA2/IL1B/PTPN22/HAVCR2/IL6/IL33/NFKBIZ/PIK3R1/SH3RF1/MMP14/RUNX1/NLRP3/CASP3/SHH/IL12A/GPR183/CLCF1/GATA2/EGR3/FAM19A3/IRS2/TNFRSF18/SLC39A10/CARD11/PNP/MIR17HG/CD24	48
GO:0045926	GO:0045926	negative regulation of growth	34/1060	199/12280	8.58798e-05	0.00206368	0.0016146	JARID2/FSTL4/DCBLD2/FGFR3/GAL/MAP2/HIF1A/BDKRB1/TGFB1/CAPRIN2/CYP27B1/PPARD/WWC1/RGS4/SOCS2/INHBA/MT2A/SEMA6D/SEMA7A/PTPRJ/CXADR/DRAXIN/MSX1/OSGIN2/DCSTAMP/GREM1/GNG4/ADRB2/MINAR1/MT1E/SERTAD2/MT1X/OSTN/MIR17HG	34
GO:0032103	GO:0032103	positive regulation of response to external stimulus	32/1060	183/12280	8.73756e-05	0.00208923	0.00163459	PTGS2/EDN1/PDGFB/TGFB1/PIK3CG/SERPINE1/CXCL12/CCL7/CYP27B1/VEGFA/IL1RL1/PGF/IL1B/ETS1/HAVCR2/IL6/IL33/FGF2/NFKBIZ/VEGFC/BMP6/FGF18/MAPK13/ITGA2/STX3/IL12A/CXCL8/THBD/FAM19A3/TGM2/MIR222/MIR221	32
GO:0099536	GO:0099536	synaptic signaling	63/1060	452/12280	8.9776e-05	0.0021306	0.00166696	SYN1/SYT7/CAMK2B/PTGS2/CACNG4/EDN1/SLC1A3/RIMS1/P2RX5/ITPR3/RASD2/GRIN2D/STX1A/APBA1/DKK1/ASIC2/KCNC4/RGS4/TSHZ3/IL1B/PRKCG/RAP1B/LRRC4/AKAP12/PDLIM4/DLG4/NGF/GABBR2/SHC3/EIF4E/PLCL2/EPHB1/NRG1/DGKI/NTNG1/ADORA1/FABP5/NETO1/STX3/GDNF/RAB3B/ADRB2/IL1RAPL1/KISS1/CDH2/KCNK3/PDE7B/PLEKHG5/CALB2/SYT12/NPAS4/MCTP1/RIMS2/EGR3/HTR1D/GRID1/GJC1/SYN3/INSYN2/ARC/SHANK3/NPAS4/DOC2B	63
GO:0097696	GO:0097696	STAT cascade	20/1060	92/12280	8.9988e-05	0.0021306	0.00166696	CRLF1/IGF1/FGFR3/DOT1L/PRLR/HES1/SOCS2/LIF/IL6/IL24/CSF2/RET/IL12A/CLCF1/CSF1R/SOCS3/IFNE/TNFRSF18/HES5/MIR221	20
GO:0007423	GO:0007423	sensory organ development	54/1060	371/12280	9.11586e-05	0.00214779	0.00168041	SOX8/BAK1/SLC4A7/USH2A/PRDM1/ATP2B4/JMJD6/GLI2/EDN1/HIF1A/PPP1R13L/TGFB1/SIPA1L3/PITX3/VEGFA/HES1/DLX2/FASLG/NR4A3/TBX2/INHBA/SOX9/BMP2/DLL4/SCO2/ATP8A2/SPRY2/SKIL/TMOD1/STRA6/BCAR3/BMPR1B/PRDM16/EPHA2/DLX1/BMP6/EPHB1/MSX1/SHH/GJB2/RET/GBX2/KCNK3/CHD7/TCAP/GATA2/NKX2-6/JAG2/FSCN2/WNT7B/DIO3/HES5/SMOC1/TENM3	54
GO:0072273	GO:0072273	metanephric nephron morphogenesis	8/1060	19/12280	9.55224e-05	0.00221636	0.00173406	SOX8/HES1/SOX9/LIF/GREM1/GDNF/HES5/FMN1	8
GO:0021879	GO:0021879	forebrain neuron differentiation	10/1060	29/12280	9.59029e-05	0.00221636	0.00173406	HES1/DLX2/SATB2/INHBA/DLX1/GBX2/GATA2/CSF1R/HES5/SHANK3	10
GO:0046850	GO:0046850	regulation of bone remodeling	10/1060	29/12280	9.59029e-05	0.00221636	0.00173406	SYT7/TNFAIP3/IL6/UBASH3B/PPARGC1B/DCSTAMP/GREM1/CSF1R/SIGLEC15/ITGB3	10
GO:0032101	GO:0032101	regulation of response to external stimulus	68/1060	499/12280	9.59045e-05	0.00221636	0.00173406	CD9/PLAUR/BIRC3/TNFRSF1B/PTGS2/MGLL/EDN1/ANGPT2/PDGFB/TGFB1/PIK3CG/SERPINE1/CXCL12/CCL7/BIRC2/CYP27B1/ADTRP/PPARD/VEGFA/FGF1/IL1RL2/IL1RL1/TNFAIP3/PGF/DUSP1/TNFAIP6/CXCL6/IL1B/PRKCG/ETS1/HAVCR2/NT5E/IL6/IL33/SEMA6D/SEMA7A/FGF2/SUSD4/NFKBIZ/MMP3/VEGFC/BMP6/UBASH3B/FGF18/MAPK13/ZSWIM5/NLRP3/ADORA1/PRKCD/ITGA2/STX3/GREM1/IL12A/CXCL8/GPR183/TRIB1/METRNL/THBD/C5orf30/SOCS3/FAM19A3/PDGFA/SERPINB2/TGM2/…	68
GO:0034329	GO:0034329	cell junction assembly	33/1060	192/12280	9.64115e-05	0.00221746	0.00173492	CD9/PRKCH/GPM6B/LAMC2/COL17A1/CBFB/TNS1/PKP1/EPB41L3/ITGA6/SMAD7/VEGFA/CDH6/SNAI1/VASP/RAP1B/FLNC/EPHA2/PTPRJ/MMP14/F11R/RUNX1/ITGA5/ITGA2/CLDN3/GJB2/GREM1/LIMS1/CDH2/GPBAR1/GJC1/LAMB3/FMN1	33
GO:0014074	GO:0014074	response to purine-containing compound	22/1060	107/12280	9.88489e-05	0.00226275	0.00177035	PTGS2/P2RX5/NOX4/EZR/PIK3CG/AREG/BIRC2/DUSP1/IL1B/FOSB/RAP1B/VGF/HCN4/REN/PPARGC1B/STC1/JUNB/PDE3A/P2RY2/FOSL1/THBD/SLC26A6	22
GO:0001501	GO:0001501	skeletal system development	55/1060	382/12280	0.000105595	0.00240577	0.00188225	IGF1/RUNX3/FGFR3/GLI2/EDN1/PTHLH/HIF1A/TIMP1/XYLT1/TGFB1/COMP/DLX2/SATB2/GPR68/COL10A1/SNAI1/SOX9/BMP2/TBX3/FGF2/BMPR1B/EPHA2/DLX1/CSRNP1/HMGA2/BMP6/ANKH/KLF10/PPARGC1B/FGF18/MMP14/EXTL1/ADAMTS4/STC1/MSX1/NPPC/HHIP/SHH/GREM1/HAS2/CHST11/CHD7/ESRRA/PHOSPHO1/RPS6KA3/CREB3L2/RFLNB/JAG2/WNT7B/COL27A1/SIGLEC15/TEAD4/HES5/FMN1/SCX	55
GO:0009617	GO:0009617	response to bacterium	50/1060	338/12280	0.000109403	0.00248082	0.00194097	TNFRSF1B/TNIP3/PTGS2/EDN1/CXCL2/ICAM1/BDKRB1/IL27RA/TGFB1/SERPINE1/MAPK8/CSF3/CYP27B1/PPARD/CCL20/FASLG/TNFAIP3/CD274/PTGFR/CXCL6/IL1B/BMP2/VGF/IRAK2/PTPN22/HAVCR2/IL6/EPHA2/REN/ANKRD1/BMP6/NLRP3/IL24/CXCL3/CXCL5/PRKCD/CASP3/CSF2/GJB2/C15orf48/IL12A/CXCL8/JUNB/CHD7/TRIB1/RPS6KA3/THBD/PDE4B/IFNE/CD24	50
GO:0045165	GO:0045165	cell fate commitment	26/1060	138/12280	0.000112619	0.00253246	0.00198137	SOX8/PRDM1/GLI2/DKK1/HES1/DLX2/CHD5/SATB2/TBX2/SOX9/BMP2/DLL4/TBX3/SPRY2/IL6/FGF2/LMO4/MCL1/DLX1/NRG1/CASP3/SHH/GATA2/JAG2/WNT7B/HES5	26
GO:0050819	GO:0050819	negative regulation of coagulation	11/1060	35/12280	0.000112729	0.00253246	0.00198137	CD9/PLAUR/EDN1/PDGFB/SERPINE1/ADTRP/UBASH3B/PRKCD/THBD/PDGFA/SERPINB2	11
GO:0045621	GO:0045621	positive regulation of lymphocyte differentiation	16/1060	66/12280	0.000115899	0.00259163	0.00202767	RUNX3/CBFB/GLI2/IL4R/TGFB1/CD83/VNN1/IL1RL2/NFKBIZ/MMP14/RUNX1/NLRP3/SHH/IL12A/EGR3/PNP	16
GO:0099537	GO:0099537	trans-synaptic signaling	62/1060	447/12280	0.000117313	0.00261116	0.00204295	SYN1/SYT7/CAMK2B/PTGS2/CACNG4/EDN1/SLC1A3/RIMS1/P2RX5/ITPR3/RASD2/GRIN2D/STX1A/APBA1/DKK1/ASIC2/KCNC4/RGS4/TSHZ3/IL1B/PRKCG/RAP1B/LRRC4/AKAP12/PDLIM4/DLG4/NGF/GABBR2/SHC3/EIF4E/PLCL2/EPHB1/DGKI/NTNG1/ADORA1/FABP5/NETO1/STX3/GDNF/RAB3B/ADRB2/IL1RAPL1/KISS1/CDH2/KCNK3/PDE7B/PLEKHG5/CALB2/SYT12/NPAS4/MCTP1/RIMS2/EGR3/HTR1D/GRID1/GJC1/SYN3/INSYN2/ARC/SHANK3/NPAS4/DOC2B	62
GO:0046651	GO:0046651	lymphocyte proliferation	28/1060	154/12280	0.000118962	0.00261451	0.00204557	IGF1/GAL/NFATC2/TGFB1/PIK3CG/HES1/CD274/IL1B/PTPN22/DOCK2/HAVCR2/IL6/MSN/SH3RF1/PLCL2/PRKCD/CASP3/SHH/IL12A/GPR183/CTPS1/CLCF1/IFNE/IRS2/SLC39A10/CARD11/PNP/CD24	28
GO:0070838	GO:0070838	divalent metal ion transport	46/1060	304/12280	0.000118989	0.00261451	0.00204557	BAK1/CAMK2B/ATP2B4/PTGS2/CACNG4/P2RX5/ICAM1/ITPR3/PDGFB/BDKRB1/HOMER2/KCNN4/TGFB1/GRIN2D/PIK3CG/TSPAN13/CXCL12/CYP27B1/SLC30A3/OPRD1/RGS4/FASLG/MCHR1/DIAPH1/TRPC4/SLC41A2/FGF2/STAC2/CASQ1/GSTO1/UBASH3B/ATP2B2/CNNM4/PKD1L1/CACHD1/STC1/NIPAL1/GEM/RRAD/TRPV3/IL1RAPL1/CHD7/NIPAL4/BHLHA15/PDE4B/SLC39A10	46
GO:0030593	GO:0030593	neutrophil chemotaxis	13/1060	47/12280	0.000119629	0.00261451	0.00204557	EDN1/CXCL2/PIK3CG/CCL7/CCL20/CXCL6/IL1B/ITGA9/CXADR/CXCL3/CXCL5/CXCL8/PDE4B	13
GO:0061045	GO:0061045	negative regulation of wound healing	13/1060	47/12280	0.000119629	0.00261451	0.00204557	CD9/PLAUR/EDN1/PDGFB/SERPINE1/ADTRP/FGF2/UBASH3B/PRKCD/THBD/PDGFA/SERPINB2/EPPK1	13
GO:0060602	GO:0060602	branch elongation of an epithelium	7/1060	15/12280	0.000121204	0.00263701	0.00206317	TNC/TGFB1/AREG/FGF1/SOX9/SPRY2/SHH	7
GO:0051591	GO:0051591	response to cAMP	17/1060	73/12280	0.000122356	0.00265014	0.00207344	NOX4/EZR/PIK3CG/AREG/BIRC2/DUSP1/FOSB/RAP1B/VGF/HCN4/REN/PPARGC1B/STC1/JUNB/FOSL1/THBD/SLC26A6	17
GO:0090288	GO:0090288	negative regulation of cellular response to growth factor stimulus	23/1060	116/12280	0.000124069	0.00267525	0.00209309	FSTL3/SMAD7/TGFB1/DKK1/SNX25/PMEPA1/SPRY2/SKIL/SMAD6/PRDM16/DLX1/XDH/GREM1/HTRA3/CHST11/MMRN2/NRROS/SHISA2/GREM2/SPRY4/ADAMTSL2/SMURF1/MIR17HG	23
GO:0061041	GO:0061041	regulation of wound healing	19/1060	87/12280	0.000125513	0.00269434	0.00210803	TNFRSF12A/CD9/PLAUR/EDN1/PDGFB/SERPINE1/ADTRP/PPARD/HBEGF/TNFAIP3/FGF2/UBASH3B/PRKCD/FOXC2/THBD/PDGFA/SERPINB2/MIR221/EPPK1	19
GO:0072511	GO:0072511	divalent inorganic cation transport	46/1060	305/12280	0.000128741	0.0027514	0.00215267	BAK1/CAMK2B/ATP2B4/PTGS2/CACNG4/P2RX5/ICAM1/ITPR3/PDGFB/BDKRB1/HOMER2/KCNN4/TGFB1/GRIN2D/PIK3CG/TSPAN13/CXCL12/CYP27B1/SLC30A3/OPRD1/RGS4/FASLG/MCHR1/DIAPH1/TRPC4/SLC41A2/FGF2/STAC2/CASQ1/GSTO1/UBASH3B/ATP2B2/CNNM4/PKD1L1/CACHD1/STC1/NIPAL1/GEM/RRAD/TRPV3/IL1RAPL1/CHD7/NIPAL4/BHLHA15/PDE4B/SLC39A10	46
GO:0007610	GO:0007610	behavior	54/1060	376/12280	0.000130056	0.00276728	0.00216509	NRXN3/USP2/GAL/PTGS2/PICALM/SLC1A3/ITPR3/RASD2/HIF1A/HOMER2/OLFM2/GRIN2D/APBA1/CXCL12/PITX3/DKK1/OPRD1/SGK1/NR4A3/PRKCG/MCHR1/NPAS1/DLG4/ATP8A2/NGF/TMOD1/STRA6/NPC1/REN/SHC3/EIF4E/ANKH/AFF2/NRG1/DGKI/AUTS2/ITGA5/ADORA1/CASP3/CSF2/NETO1/NAV2/GDNF/CHD7/GATM/NPAS4/FOSL1/HTR1D/GPR157/GRID1/NPW/ARC/SHANK3/NPAS4	54
GO:0050806	GO:0050806	positive regulation of synaptic transmission	22/1060	109/12280	0.000131662	0.00278915	0.0021822	SYT7/PTGS2/CACNG4/SLC1A3/RIMS1/ITPR3/GRIN2D/STX1A/RGS4/TSHZ3/DLG4/ADORA1/NETO1/STX3/RAB3B/ADRB2/KISS1/CALB2/SYT12/RIMS2/ARC/SHANK3	22
GO:0051896	GO:0051896	regulation of protein kinase B signaling	28/1060	155/12280	0.000133506	0.00281586	0.00220311	FGFR3/NOX4/RASD2/PDGFB/TGFB1/PIK3CG/CSF3/HBEGF/FGF1/EREG/SPRY2/FGF5/FGF2/EPHA2/PIK3R1/PTPRJ/FGF18/NRG1/XDH/RET/OTUD3/TNFAIP8L3/IRS2/PDGFA/MIR222/MIR221/MIR138-1/MIR29A	28
GO:0048709	GO:0048709	oligodendrocyte differentiation	16/1060	67/12280	0.000140247	0.0029452	0.0023043	SOX8/CD9/HDAC10/ERCC2/TGFB1/HES1/DLX2/SOX9/TRPC4/TSPAN2/DLX1/NRG1/SHH/ID4/HES5/ZNF488	16
GO:0043535	GO:0043535	regulation of blood vessel endothelial cell migration	18/1060	81/12280	0.000148414	0.00307869	0.00240874	MAP2K3/PTGS2/ANGPT2/HMOX1/PDGFB/HIF1A/TGFB1/VEGFA/DLL4/ETS1/FGF2/EPHA2/VEGFC/FGF18/MMRN2/FOXC2/GATA2/MIR221	18
GO:0040013	GO:0040013	negative regulation of locomotion	40/1060	255/12280	0.000149552	0.00307869	0.00240874	TIE1/NAV3/ANGPT2/HMOX1/SMAD7/TIMP1/TGFB1/SERPINE1/CXCL12/GTPBP4/ARHGDIB/ADTRP/PPARD/DUSP1/DLL4/IL33/SEMA6D/SEMA7A/FGF2/TPM1/MYOCD/RHOB/PTPRJ/PTPRR/NRG1/STC1/IL24/ADORA1/SHH/GREM1/MMRN2/TRIB1/MCTP1/C5orf30/TACSTD2/SRGAP1/MIR221/MIR138-1/EPPK1/MIR29A	40
GO:0032943	GO:0032943	mononuclear cell proliferation	28/1060	156/12280	0.000149619	0.00307869	0.00240874	IGF1/GAL/NFATC2/TGFB1/PIK3CG/HES1/CD274/IL1B/PTPN22/DOCK2/HAVCR2/IL6/MSN/SH3RF1/PLCL2/PRKCD/CASP3/SHH/IL12A/GPR183/CTPS1/CLCF1/IFNE/IRS2/SLC39A10/CARD11/PNP/CD24	28
GO:0071216	GO:0071216	cellular response to biotic stimulus	28/1060	156/12280	0.000149619	0.00307869	0.00240874	TNFRSF1B/TNIP3/CXCL2/ICAM1/TGFB1/SERPINE1/MAPK8/CSF3/PPARD/TNFAIP3/CD274/CXCL6/IL1B/IRAK2/PTPN22/HAVCR2/IL6/ANKRD1/BMP6/NLRP3/IL24/CXCL3/CXCL5/CSF2/IL12A/CXCL8/TRIB1/PDE4B	28
GO:0031424	GO:0031424	keratinization	11/1060	36/12280	0.000149792	0.00307869	0.00240874	PKP1/DSP/KRT33B/KRT15/KRT79/LCE2A/LCE2C/KRTAP1-1/KRT81/KRTAP4-9/KRTAP2-3	11
GO:0046637	GO:0046637	regulation of alpha-beta T cell differentiation	12/1060	42/12280	0.000154863	0.00316945	0.00247974	RUNX3/PRDM1/CBFB/IL4R/SMAD7/CD83/NFKBIZ/SH3RF1/RUNX1/NLRP3/SHH/PNP	12
GO:0010594	GO:0010594	regulation of endothelial cell migration	25/1060	133/12280	0.000157311	0.00320595	0.00250831	MAP2K3/PTGS2/EDN1/ANGPT2/HMOX1/PDGFB/HIF1A/TGFB1/VEGFA/FGF1/DLL4/ETS1/FGF2/EPHA2/RHOB/VEGFC/FGF18/STC1/ATOH8/MMRN2/FOXC2/GATA2/MIR221/ITGB3/MIR29A	25
GO:0008016	GO:0008016	regulation of heart contraction	26/1060	141/12280	0.000162264	0.00326731	0.00255631	ATP2B4/EDN1/ITPR3/DSP/KCNK6/SMAD7/PIK3CG/BVES/HBEGF/RGS4/TBX2/HCN4/TPM1/CASQ1/GSTO1/CXADR/ATP2B2/STC1/NPPC/ADORA1/KCNK3/HSPB7/DES/GJC1/SCN5A/PDE4B	26
GO:0070374	GO:0070374	positive regulation of ERK1 and ERK2 cascade	26/1060	141/12280	0.000162264	0.00326731	0.00255631	TIE1/FGFR3/NOX4/ICAM1/PDGFB/FLT1/TGFB1/CCL7/CCL20/BMP2/RAP1B/PTPN22/HAVCR2/SPRY2/SEMA7A/FGF2/EPHA2/EPHB1/FGF18/RET/GPR183/CSF1R/TNFAIP8L3/PDGFA/MIR222/MIR221	26
GO:0050866	GO:0050866	negative regulation of cell activation	23/1060	118/12280	0.000162351	0.00326731	0.00255631	CD9/RUNX3/CBFB/GAL/IL4R/HMOX1/PDGFB/SMAD7/TGFB1/TNFAIP3/CD274/INHBA/IL13RA2/PTPN22/HAVCR2/UBASH3B/RUNX1/PRKCD/CASP3/SHH/THBD/FAM19A3/PDGFA	23
GO:0045639	GO:0045639	positive regulation of myeloid cell differentiation	16/1060	68/12280	0.000168938	0.00338577	0.00264899	HIF1A/TGFB1/CSF3/GPR68/INHBA/LIF/ETS1/KLF10/PPARGC1B/RUNX1/DCSTAMP/TRIB1/GATA2/EVI2B/MIR222/MIR221	16
GO:0014812	GO:0014812	muscle cell migration	17/1060	75/12280	0.000174202	0.00347654	0.00272001	IGF1/NOX4/PDGFB/SERPINE1/PPARD/NR4A3/SEMA6D/TPM1/MYOCD/DOCK5/ITGA2/HAS2/TRIB1/NET1/PDGFA/MIR221/ITGB3	17
GO:0030279	GO:0030279	negative regulation of ossification	14/1060	55/12280	0.000175626	0.00347654	0.00272001	HIF1A/TGFB1/DKK1/AREG/ID3/SOX9/ID1/KREMEN2/SMAD6/GREM1/RFLNB/OSTN/SMURF1/MIR138-1	14
GO:0042475	GO:0042475	odontogenesis of dentin-containing tooth	14/1060	55/12280	0.000175626	0.00347654	0.00272001	TNC/GLI2/ITGA6/SERPINE1/DLX2/BMP2/ENAM/DLX1/CNNM4/MSX1/SHH/ODAPH/SCN5A/JAG2	14
GO:0021700	GO:0021700	developmental maturation	32/1060	190/12280	0.000180365	0.00355577	0.002782	SOX8/IGF1/POU2F2/NSUN2/CAMK2B/CBFB/FGFR3/GAL/PICALM/NRCAM/HIF1A/FERMT1/XYLT1/ERCC2/LYL1/VEGFA/HES1/EREG/BMP2/KLF2/DLG4/REN/NPPC/RET/GREM1/PDE3A/PHOSPHO1/GATA2/BHLHA15/RFLNB/HES5/SLC26A6	32
GO:0051249	GO:0051249	regulation of lymphocyte activation	41/1060	266/12280	0.000183291	0.00359876	0.00281564	IGF1/RUNX3/PRDM1/CBFB/GAL/GLI2/IL4R/NFATC2/SMAD7/IL27RA/TGFB1/CD83/VNN1/HES1/IL1RL2/TNFAIP3/CD274/INHBA/IL1B/PTPN22/HAVCR2/IL6/NFKBIZ/PIK3R1/SH3RF1/MMP14/RUNX1/NLRP3/CASP3/SHH/IL12A/GPR183/CLCF1/EGR3/IRS2/TNFRSF18/SLC39A10/CARD11/PNP/MIR17HG/CD24	41
GO:0007178	GO:0007178	transmembrane receptor protein serine/threonine kinase signaling pathway	39/1060	249/12280	0.00018592	0.00362261	0.0028343	FSTL3/PXN/FERMT1/SMAD7/TGFB1/DKK1/SNX25/HES1/SMAD9/INHBA/PMEPA1/BMP2/ID1/SKIL/SMAD6/BMPR1B/MYOCD/PRDM16/DLX1/BTBD11/BMP6/KLF10/F11R/MSX1/SHH/GREM1/ATOH8/HTRA3/CHST11/NRROS/RGMB/GREM2/FAM83G/ADAMTSL2/HES5/SMURF1/MIR17HG/FOXD1/SCX	39
GO:0006936	GO:0006936	muscle contraction	37/1060	232/12280	0.000186006	0.00362261	0.0028343	MAP2K3/PTGS2/EDN1/PXN/DSP/SMAD7/PPP1R13L/COMP/PIK3CG/SGCA/TACR1/CNN1/ATP8A2/TMOD1/HCN4/TPM1/MYOCD/MYOM3/CASQ1/DOCK5/GSTO1/KCNMA1/STC1/ACTC1/ADORA1/ITGA2/GDNF/ADRB2/TCAP/DES/SPHK1/HTR1D/GJC1/SCN5A/SMTN/PDE4B/RCSD1	37
GO:0003170	GO:0003170	heart valve development	13/1060	49/12280	0.000189824	0.00368212	0.00288086	TNFRSF1B/ELN/PRDM1/TGFB1/SNAI1/SOX9/BMP2/DLL4/SMAD6/STRA6/HEYL/HEY1/SCX	13
GO:0046697	GO:0046697	decidualization	7/1060	16/12280	0.000199464	0.00385364	0.00301505	PTGS2/CYP27B1/PPARD/LIF/STC1/GJB2/JUNB	7
GO:0001892	GO:0001892	embryonic placenta development	16/1060	69/12280	0.000202601	0.00389866	0.00305027	PRDM1/PDGFB/HIF1A/PCDH12/HES1/SNAI1/LIF/RSPO3/CSF2/HEY1/E2F7/SPINT1/JUNB/GATA2/SOCS3/WNT7B	16
GO:0051251	GO:0051251	positive regulation of lymphocyte activation	30/1060	175/12280	0.000206289	0.00395386	0.00309347	IGF1/RUNX3/CBFB/GLI2/IL4R/NFATC2/TGFB1/CD83/VNN1/HES1/IL1RL2/CD274/IL1B/HAVCR2/IL6/NFKBIZ/PIK3R1/MMP14/RUNX1/NLRP3/SHH/IL12A/GPR183/CLCF1/EGR3/IRS2/SLC39A10/CARD11/PNP/CD24	30
GO:0030947	GO:0030947	regulation of vascular endothelial growth factor receptor signaling pathway	9/1060	26/12280	0.000208003	0.00395987	0.00309817	HIF1A/FLT1/VEGFA/IL1B/VEGFC/FGF18/ITGA5/MMRN2/ITGB3	9
GO:0043270	GO:0043270	positive regulation of ion transport	29/1060	167/12280	0.000208242	0.00395987	0.00309817	CNTN1/BAK1/GAL/CACNG4/EDN1/P2RX5/ABCB1/PDGFB/BDKRB1/CXCL12/IL1B/WNK4/MCHR1/ATP8A2/STAC2/CASQ1/GSTO1/STC1/LRRC38/ADORA1/PRKCD/TRPV3/GDNF/RAB3B/ADRB2/PDZK1/SCN5A/ARC/SHANK3	29
GO:0015893	GO:0015893	drug transport	23/1060	120/12280	0.000210741	0.00399168	0.00312306	SYT7/SLC38A5/GAL/EDN1/SLC1A3/ABCB1/CXCL12/FOLR3/RGS4/SLC19A2/INHBA/SLC19A3/STRA6/SLC13A4/GDNF/RAB3B/SYT12/PDZK1/SLC25A22/SLC35F3/SLC6A17/SYT15/SLC26A6	23
GO:0001936	GO:0001936	regulation of endothelial cell proliferation	21/1060	105/12280	0.000212198	0.00400359	0.00313237	HMOX1/PDGFB/HIF1A/FLT1/CXCL12/VEGFA/ITGA4/PGF/NR4A1/BMP2/DLL4/FGF2/VEGFC/BMP6/XDH/ATOH8/GATA2/EGR3/MIR222/ITGB3/MIR29A	21
GO:0051962	GO:0051962	positive regulation of nervous system development	56/1060	402/12280	0.000221463	0.00416212	0.00325641	SOX8/TNFRSF12A/CNTN1/PRKCH/CAMK2B/GLI2/PLXNA2/RIMS1/NRCAM/HIF1A/TGFB1/CXCL12/PITX3/DKK1/ASIC2/CAPRIN2/VEGFA/HES1/DLX2/SOCS2/PACSIN1/CPNE5/IL1B/BMP2/LIF/DLG4/ATP8A2/NUMB/NGF/IL6/SKIL/SEMA7A/AMIGO2/CBLN2/ABL2/DLX1/ANKRD1/VEGFC/BMP6/EPHB1/GRIP1/HEYL/SHH/RET/SPINT1/ISLR2/IL1RAPL1/CLCF1/RIMS2/GATA2/CREB3L2/SMURF1/MIR222/MIR221/TENM3/SHANK3	56
GO:0030324	GO:0030324	lung development	25/1060	136/12280	0.000226317	0.00423687	0.00331488	TNC/FSTL3/JMJD6/GLI2/CRISPLD2/VEGFA/FGF1/HES1/ERRFI1/SOX9/ID1/KLF2/LIF/SPRY2/STRA6/MYOCD/EIF4E/FGF18/MMP14/HHIP/SHH/WNT7B/PDGFA/ADAMTSL2/MIR17HG	25
GO:0070167	GO:0070167	regulation of biomineral tissue development	15/1060	63/12280	0.000232899	0.00434325	0.00339812	GPM6B/HIF1A/TGFB1/CYP27B1/SOX9/BMP2/ENAM/BMPR1B/BMP6/ANKH/GREM1/ADRB2/PHOSPHO1/ODAPH/RFLNB	15
GO:1903530	GO:1903530	regulation of secretion by cell	64/1060	477/12280	0.000238385	0.00442845	0.00346478	SYN1/SYT7/IGF1/TNFRSF1B/RAB27B/GAL/IL4R/EDN1/RIMS1/EZR/IL11/ITPR3/HMOX1/HIF1A/FERMT1/KCNN4/TGFB1/STX1A/APBA1/CXCL12/ADTRP/PPARD/IL1RL1/KCNC4/TNFAIP3/GPR68/CD274/INHBA/IL13RA2/IL1B/PRKCG/RAP1B/LIF/ARNTL/PTPN22/HAVCR2/IL6/IL33/REN/ANKRD1/VEGFC/BMP6/HK1/DGKI/NLRP3/ADORA1/STXBP5/NKX3-1/GDNF/RAB3B/IL1RAPL1/KISS1/KCNS3/CHD7/C2CD2L/SYT12/MCTP1/RIMS2/GATA2/CSF1R/IRS2/SYT15/MMP12/DOC2B	64
GO:0046631	GO:0046631	alpha-beta T cell activation	18/1060	84/12280	0.000241242	0.00446041	0.00348978	RUNX3/PRDM1/CBFB/IL4R/TCF7/SMAD7/CD83/CD274/DOCK2/IL6/NFKBIZ/SH3RF1/RUNX1/NLRP3/SHH/IL12A/GPR183/PNP	18
GO:0042326	GO:0042326	negative regulation of phosphorylation	52/1060	367/12280	0.000241952	0.00446041	0.00348978	BAK1/RPS6KA6/GCKR/EZR/GADD45B/TIMP3/BDKRB1/SMAD7/TGFB1/DKK1/PPIF/SNX25/CBLB/ERRFI1/RGS4/TNFAIP3/DUSP1/DUSP4/INHBA/PMEPA1/IL1B/LIF/PTPN22/PRR5L/SPRY2/SMAD6/DUSP5/RGS3/MYOCD/RUBCN/PTPRJ/PTPRR/UBASH3B/DUSP2/XDH/PRKCD/DUSP7/CASP3/DACT1/GREM1/PKIA/TRIB1/SH3BP5L/ANKLE2/SOCS3/IRS2/C1QL4/SPRY4/IPO7/MIR221/MIR138-1/DBNDD2	52
GO:0034405	GO:0034405	response to fluid shear stress	10/1060	32/12280	0.000243136	0.00446519	0.00349352	PTGS2/SMAD7/TGFB1/TFPI2/KLF2/ETS1/SMAD6/CSF2/MTSS1/HAS2	10
GO:0007268	GO:0007268	chemical synaptic transmission	60/1060	441/12280	0.000255196	0.00462203	0.00361623	SYN1/SYT7/CAMK2B/PTGS2/CACNG4/EDN1/SLC1A3/RIMS1/P2RX5/ITPR3/RASD2/GRIN2D/STX1A/APBA1/DKK1/ASIC2/KCNC4/RGS4/TSHZ3/IL1B/PRKCG/RAP1B/LRRC4/AKAP12/PDLIM4/DLG4/NGF/GABBR2/SHC3/EIF4E/PLCL2/EPHB1/DGKI/NTNG1/ADORA1/NETO1/STX3/GDNF/RAB3B/ADRB2/KISS1/CDH2/KCNK3/PDE7B/PLEKHG5/CALB2/SYT12/NPAS4/MCTP1/RIMS2/EGR3/HTR1D/GRID1/GJC1/SYN3/INSYN2/ARC/SHANK3/NPAS4/DOC2B	60
GO:0098916	GO:0098916	anterograde trans-synaptic signaling	60/1060	441/12280	0.000255196	0.00462203	0.00361623	SYN1/SYT7/CAMK2B/PTGS2/CACNG4/EDN1/SLC1A3/RIMS1/P2RX5/ITPR3/RASD2/GRIN2D/STX1A/APBA1/DKK1/ASIC2/KCNC4/RGS4/TSHZ3/IL1B/PRKCG/RAP1B/LRRC4/AKAP12/PDLIM4/DLG4/NGF/GABBR2/SHC3/EIF4E/PLCL2/EPHB1/DGKI/NTNG1/ADORA1/NETO1/STX3/GDNF/RAB3B/ADRB2/KISS1/CDH2/KCNK3/PDE7B/PLEKHG5/CALB2/SYT12/NPAS4/MCTP1/RIMS2/EGR3/HTR1D/GRID1/GJC1/SYN3/INSYN2/ARC/SHANK3/NPAS4/DOC2B	60
GO:0021872	GO:0021872	forebrain generation of neurons	11/1060	38/12280	0.000255503	0.00462203	0.00361623	HES1/DLX2/SATB2/INHBA/NUMB/DLX1/GBX2/GATA2/CSF1R/HES5/SHANK3	11
GO:0043551	GO:0043551	regulation of phosphatidylinositol 3-kinase activity	11/1060	38/12280	0.000255503	0.00462203	0.00361623	FGFR3/PDGFB/FLT1/TGFB1/SOCS2/FGF2/RUBCN/PIK3R1/TNFAIP8L3/SOCS3/MIR138-1	11
GO:0051480	GO:0051480	regulation of cytosolic calcium ion concentration	32/1060	194/12280	0.000266613	0.004805	0.00375939	BAK1/ATP2B4/EDN1/P2RX5/ITPR3/BDKRB1/TGFB1/GRIN2D/PIK3CG/TACR1/FASLG/PTGFR/MCHR1/DIAPH1/DLG4/TRPC4/FGF2/CASQ1/ABL2/GSTO1/UBASH3B/ATP2B2/ADORA1/KISS1/KCNK3/CHD7/CALB2/GPR4/GATA2/GPR157/TGM2/CD24	32
GO:0032102	GO:0032102	negative regulation of response to external stimulus	34/1060	211/12280	0.000273945	0.00491879	0.00384841	CD9/PLAUR/TNFRSF1B/EDN1/ANGPT2/PDGFB/SERPINE1/ADTRP/PPARD/TNFAIP3/DUSP1/TNFAIP6/ETS1/HAVCR2/NT5E/SEMA6D/SEMA7A/FGF2/UBASH3B/NLRP3/ADORA1/PRKCD/GREM1/TRIB1/METRNL/THBD/C5orf30/SOCS3/FAM19A3/PDGFA/SERPINB2/MIR222/MIR221/EPPK1	34
GO:0046632	GO:0046632	alpha-beta T cell differentiation	15/1060	64/12280	0.000280311	0.00501445	0.00392326	RUNX3/PRDM1/CBFB/IL4R/TCF7/SMAD7/CD83/IL6/NFKBIZ/SH3RF1/RUNX1/NLRP3/SHH/GPR183/PNP	15
GO:0002687	GO:0002687	positive regulation of leukocyte migration	18/1060	85/12280	0.000281821	0.00502285	0.00392983	EDN1/ICAM1/BDKRB1/TGFB1/SERPINE1/CXCL12/CCL7/VEGFA/CCL20/ITGA4/PGF/IL6/VEGFC/MMP14/ITGA2/IL12A/CXCL8/TNFRSF18	18
GO:0048661	GO:0048661	positive regulation of smooth muscle cell proliferation	16/1060	71/12280	0.000287722	0.00510081	0.00399082	IGF1/PTGS2/EDN1/HMOX1/PDGFB/HBEGF/NR4A3/EREG/IL6/FGF2/ITGA2/ERN1/HES5/TGM2/MIR222/MIR221	16
GO:0050853	GO:0050853	B cell receptor signaling pathway	9/1060	27/12280	0.000288306	0.00510081	0.00399082	PRKCH/CBFB/LAT2/NFATC2/LPXN/PTPN22/PLCL2/RUNX1/SLC39A10	9
GO:0002042	GO:0002042	cell migration involved in sprouting angiogenesis	13/1060	51/12280	0.00029271	0.00514106	0.00402232	PTGS2/HMOX1/ADTRP/VEGFA/NR4A1/DLL4/FGF2/GREM1/MMRN2/FOXC2/GATA2/EGR3/MIR221	13
GO:0014015	GO:0014015	positive regulation of gliogenesis	13/1060	51/12280	0.00029271	0.00514106	0.00402232	SOX8/PRKCH/TGFB1/HES1/IL1B/BMP2/LIF/IL6/SHH/SPINT1/CLCF1/MIR222/MIR221	13
GO:0043406	GO:0043406	positive regulation of MAP kinase activity	33/1060	204/12280	0.000311358	0.00543649	0.00425346	IGF1/MAP2K3/EDN1/NOX4/GADD45B/PDGFB/FLT1/TGFB1/PIK3CG/DKK1/VEGFA/FGF1/IL1B/BMP2/GADD45G/IRAK2/NGF/DUSP5/FGF2/FGF18/NRG1/TGFA/ADORA1/NEK10/DUSP7/RET/MLKL/CSPG4/FZD8/ERN1/WNT7B/PDGFA/CD24	33
GO:0002683	GO:0002683	negative regulation of immune system process	44/1060	299/12280	0.000311782	0.00543649	0.00425346	RUNX3/CBFB/GAL/FSTL3/IL4R/EZR/HMOX1/SMAD7/IL27RA/TGFB1/CXCL12/LPXN/ADTRP/HES1/IL1RL1/TNFAIP3/GPR68/DUSP1/CD274/INHBA/IL13RA2/SOX9/PTPN22/HAVCR2/IL33/PIK3R1/PTPRJ/UBASH3B/PLCL2/TSC22D3/RUNX1/FCRLB/ADORA1/CASP3/SHH/GREM1/KLF13/TRIB1/GATA2/FAM19A3/HES5/MIR222/MIR221/MMP12	44
GO:0030856	GO:0030856	regulation of epithelial cell differentiation	19/1060	93/12280	0.000314374	0.00546196	0.00427339	PRKCH/CBFB/SERPINE1/CYP27B1/HES1/ERRFI1/SOX9/IL1B/ID1/LIF/ARNTL/TBX3/BMP6/XDH/RUNX1/GDNF/ATOH8/HES5/CD24	19
GO:2000463	GO:2000463	positive regulation of excitatory postsynaptic potential	8/1060	22/12280	0.000319594	0.00552769	0.00432481	RIMS1/STX1A/RGS4/DLG4/NETO1/ADRB2/RIMS2/SHANK3	8
GO:0048644	GO:0048644	muscle organ morphogenesis	14/1060	58/12280	0.000320446	0.00552769	0.00432481	DSP/SMAD7/TGFB1/BMP2/LIF/DLL4/TPM1/MYOM3/ANKRD1/NRG1/ACTC1/XIRP2/CHD7/TCAP	14
GO:0070098	GO:0070098	chemokine-mediated signaling pathway	10/1060	33/12280	0.000322142	0.00553317	0.0043291	EDN1/CXCL2/HIF1A/CXCL12/CCL7/CCL20/CXCL6/CXCL3/CXCL5/CXCL8	10
GO:0002064	GO:0002064	epithelial cell development	26/1060	147/12280	0.000323054	0.00553317	0.0043291	SOX8/SLC4A7/PRDM1/ICAM1/EZR/PDGFB/HIF1A/FNDC3A/SIPA1L3/SOX9/IL1B/ID1/RAP1B/PODXL/ARNTL/FLNB/TMOD1/EPHA2/MSN/BMP6/MYO1E/F11R/STC1/CLDN3/GPR4/WNT7B	26
GO:1990868	GO:1990868	response to chemokine	11/1060	39/12280	0.000328454	0.00558602	0.00437045	EDN1/CXCL2/HIF1A/CXCL12/CCL7/CCL20/DUSP1/CXCL6/CXCL3/CXCL5/CXCL8	11
GO:1990869	GO:1990869	cellular response to chemokine	11/1060	39/12280	0.000328454	0.00558602	0.00437045	EDN1/CXCL2/HIF1A/CXCL12/CCL7/CCL20/DUSP1/CXCL6/CXCL3/CXCL5/CXCL8	11
GO:0072507	GO:0072507	divalent inorganic cation homeostasis	43/1060	291/12280	0.000331911	0.00561063	0.00438971	BAK1/ATP2B4/EDN1/P2RX5/ITPR3/BDKRB1/TGFB1/GRIN2D/PIK3CG/CXCL12/CCL7/CYP27B1/SLC30A3/TACR1/FASLG/PTGFR/MT2A/MCHR1/DIAPH1/DLG4/TRPC4/ATP13A3/FGF2/CASQ1/ABL2/GSTO1/UBASH3B/ATP2B2/CNNM4/STC1/ADORA1/MT1E/KISS1/KCNK3/CHD7/CALB2/GPR4/GATA2/GPR157/MT1X/SLC39A10/TGM2/CD24	43
GO:0003007	GO:0003007	heart morphogenesis	31/1060	188/12280	0.000332224	0.00561063	0.00438971	ELN/DSP/HIF1A/SMAD7/PPP1R13L/TGFB1/DKK1/VEGFA/HES1/TBX2/SNAI1/SOX9/BMP2/DLL4/MICAL2/TBX3/SMAD6/TPM1/MYOM3/ANKRD1/NRG1/ACTC1/XIRP2/MSX1/HEYL/HEY1/SHH/HAS2/CHD7/TCAP/MIR17HG	31
GO:0050870	GO:0050870	positive regulation of T cell activation	24/1060	132/12280	0.000355001	0.00596288	0.0046653	IGF1/RUNX3/CBFB/GLI2/IL4R/TGFB1/CD83/VNN1/HES1/IL1RL2/CD274/IL1B/HAVCR2/IL6/NFKBIZ/PIK3R1/RUNX1/NLRP3/SHH/IL12A/EGR3/CARD11/PNP/CD24	24
GO:0045936	GO:0045936	negative regulation of phosphate metabolic process	61/1060	456/12280	0.000359153	0.00596288	0.0046653	BAK1/RPS6KA6/GCKR/PPP1R15A/EZR/GADD45B/TIMP3/PDGFB/BDKRB1/SMAD7/TGFB1/DKK1/PPIF/SNX25/ARFGEF3/CBLB/ERRFI1/RGS4/TNFAIP3/DUSP1/DUSP4/INHBA/PMEPA1/IL1B/LIF/PTPN22/SPOCD1/PRR5L/SPRY2/SMAD6/DUSP5/RGS3/MYOCD/RUBCN/PTPRJ/PTPRR/UBASH3B/DUSP2/XDH/CNST/PRKCD/DUSP7/CASP3/DACT1/GREM1/PKIA/TRIB1/SH3BP5L/MYO1D/ANKLE2/SOCS3/IRS2/C1QL4/SPRY4/PDGFA/PPP1R14C/IPO7/MIR221/MIR138-1/ELFN1/DBNDD2	61
GO:0048667	GO:0048667	cell morphogenesis involved in neuron differentiation	61/1060	456/12280	0.000359153	0.00596288	0.0046653	TNFRSF12A/NRXN3/FSTL4/CAMK2B/NGEF/CRMP1/PICALM/GLI2/PLXNA2/RAP1GAP/MAP2/SLC1A3/NRCAM/EZR/DOK5/CXCL12/CAPRIN2/VEGFA/HES1/TTL/ITGA4/NR4A3/VASP/ID1/MAP1S/DLG4/ATP8A2/NUMB/NGF/DOCK10/SKIL/SEMA6D/SPTBN5/MYPN/SEMA7A/BMPR1B/PIK3R1/SHC3/EPHB1/AUTS2/ZSWIM5/DRAXIN/NTNG1/PDLIM5/SHH/DRGX/RET/ISLR2/GBX2/GDNF/IL1RAPL1/B3GNT2/CDH2/RAPH1/FBXO45/CSF1R/IRS2/COL25A1/ARC/SHANK3/FOXD1	61
GO:0030323	GO:0030323	respiratory tube development	25/1060	140/12280	0.000359341	0.00596288	0.0046653	TNC/FSTL3/JMJD6/GLI2/CRISPLD2/VEGFA/FGF1/HES1/ERRFI1/SOX9/ID1/KLF2/LIF/SPRY2/STRA6/MYOCD/EIF4E/FGF18/MMP14/HHIP/SHH/WNT7B/PDGFA/ADAMTSL2/MIR17HG	25
GO:0030500	GO:0030500	regulation of bone mineralization	13/1060	52/12280	0.000359895	0.00596288	0.0046653	GPM6B/HIF1A/TGFB1/CYP27B1/SOX9/BMP2/BMPR1B/BMP6/ANKH/GREM1/ADRB2/PHOSPHO1/RFLNB	13
GO:0006820	GO:0006820	anion transport	52/1060	373/12280	0.000360489	0.00596288	0.0046653	SLC38A5/ABCC2/SLC4A7/SLC4A8/EDN1/SLC1A3/ABCB1/PITPNM3/SLC7A8/SLCO4A1/SLC7A6/KCNN4/APBA1/SLC16A6/FOLR3/PPARD/PLA2G4A/RGS4/SLC19A2/IL1B/WNK4/BEST3/ATP8A2/TRPC4/SLC37A2/LRRC8A/STRA6/PRKG2/BEST4/SLC20A1/ANO7/SLC16A2/ANKH/PITPNC1/STC1/ADORA1/PRKCD/SLC13A4/MFSD2A/CLIC3/LRRC8C/C2CD2L/SLCO2A1/PDZK1/SLC25A22/TNFAIP8L3/IRS2/AKR1C1/CLDN4/SLC6A17/ATP10A/SLC26A6	52
GO:1901343	GO:1901343	negative regulation of vasculature development	19/1060	94/12280	0.000362766	0.00596359	0.00466586	TIE1/ANGPT2/PDGFB/NFATC2/SERPINE1/FASLG/KLF2/DLL4/SPRY2/EPHA2/XDH/MINAR1/MMRN2/GPR4/MIR377/MIR222/MIR221/MIR138-1/MIR29A	19
GO:0050769	GO:0050769	positive regulation of neurogenesis	51/1060	364/12280	0.000363001	0.00596359	0.00466586	SOX8/TNFRSF12A/CNTN1/PRKCH/CAMK2B/GLI2/PLXNA2/RIMS1/NRCAM/HIF1A/TGFB1/CXCL12/DKK1/CAPRIN2/VEGFA/HES1/DLX2/SOCS2/PACSIN1/CPNE5/IL1B/BMP2/LIF/DLG4/ATP8A2/NUMB/NGF/IL6/SKIL/SEMA7A/ABL2/DLX1/ANKRD1/VEGFC/BMP6/GRIP1/HEYL/SHH/RET/SPINT1/ISLR2/IL1RAPL1/CLCF1/RIMS2/GATA2/CREB3L2/SMURF1/MIR222/MIR221/TENM3/SHANK3	51
GO:0010959	GO:0010959	regulation of metal ion transport	38/1060	249/12280	0.000380423	0.00621276	0.0048608	CNTN1/KCNG1/BAK1/CAMK2B/ATP2B4/GAL/PTGS2/P2RX5/NKAIN1/ICAM1/PDGFB/BDKRB1/HOMER2/TGFB1/PIK3CG/TSPAN13/CXCL12/OPRD1/RGS4/WNK4/MCHR1/DIAPH1/STAC2/CASQ1/GSTO1/UBASH3B/KCNS2/STC1/LRRC38/ADORA1/GEM/NETO1/RRAD/TRPV3/ADRB2/CHD7/SCN5A/PDE4B	38
GO:0010563	GO:0010563	negative regulation of phosphorus metabolic process	61/1060	457/12280	0.00038074	0.00621276	0.0048608	BAK1/RPS6KA6/GCKR/PPP1R15A/EZR/GADD45B/TIMP3/PDGFB/BDKRB1/SMAD7/TGFB1/DKK1/PPIF/SNX25/ARFGEF3/CBLB/ERRFI1/RGS4/TNFAIP3/DUSP1/DUSP4/INHBA/PMEPA1/IL1B/LIF/PTPN22/SPOCD1/PRR5L/SPRY2/SMAD6/DUSP5/RGS3/MYOCD/RUBCN/PTPRJ/PTPRR/UBASH3B/DUSP2/XDH/CNST/PRKCD/DUSP7/CASP3/DACT1/GREM1/PKIA/TRIB1/SH3BP5L/MYO1D/ANKLE2/SOCS3/IRS2/C1QL4/SPRY4/PDGFA/PPP1R14C/IPO7/MIR221/MIR138-1/ELFN1/DBNDD2	61
GO:0046634	GO:0046634	regulation of alpha-beta T cell activation	14/1060	59/12280	0.0003873	0.00627738	0.00491136	RUNX3/PRDM1/CBFB/IL4R/SMAD7/CD83/CD274/NFKBIZ/SH3RF1/RUNX1/NLRP3/SHH/IL12A/PNP	14
GO:0051781	GO:0051781	positive regulation of cell division	14/1060	59/12280	0.0003873	0.00627738	0.00491136	PDGFB/TGFB1/VEGFA/FGF1/PGF/EREG/IL1B/FGF5/FGF2/VEGFC/TGFA/SHH/NKX3-1/PDGFA	14
GO:0006937	GO:0006937	regulation of muscle contraction	20/1060	102/12280	0.000391064	0.00629447	0.00492473	PTGS2/EDN1/DSP/SMAD7/PIK3CG/TACR1/CNN1/HCN4/TPM1/MYOCD/CASQ1/DOCK5/GSTO1/STC1/ADORA1/ITGA2/ADRB2/SPHK1/SCN5A/PDE4B	20
GO:0001558	GO:0001558	regulation of cell growth	48/1060	338/12280	0.000392849	0.00629447	0.00492473	TNFRSF12A/IGF1/FSTL4/DCBLD2/GAL/MAP2/EDN1/RIMS1/EPB41L3/NRCAM/BDKRB1/TGFB1/CXCL12/CAPRIN2/CYP27B1/PPARD/VEGFA/HBEGF/TTL/RGS4/RPS6KA1/SGK1/SOCS2/INHBA/CPNE5/NGF/SEMA6D/SEMA7A/MYOCD/PTPRJ/MMP14/DRAXIN/MSX1/ESM1/OSGIN2/DCSTAMP/GREM1/ISLR2/GNG4/MINAR1/HTRA3/NET1/SPHK1/RIMS2/RPS6KA3/SERTAD2/OSTN/SMURF1	48
GO:1904705	GO:1904705	regulation of vascular smooth muscle cell proliferation	12/1060	46/12280	0.000394577	0.00629447	0.00492473	IGF1/EDN1/HMOX1/PDGFB/NR4A3/CNN1/FGF2/TPM1/MYOCD/ERN1/MIR222/MIR221	12
GO:1990874	GO:1990874	vascular smooth muscle cell proliferation	12/1060	46/12280	0.000394577	0.00629447	0.00492473	IGF1/EDN1/HMOX1/PDGFB/NR4A3/CNN1/FGF2/TPM1/MYOCD/ERN1/MIR222/MIR221	12
GO:0030183	GO:0030183	B cell differentiation	17/1060	80/12280	0.00039487	0.00629447	0.00492473	POU2F2/BAK1/IL11/LYL1/ITGA4/INHBA/DOCK10/LRRC8A/PIK3R1/PTPRJ/PLCL2/MMP14/GPR183/CLCF1/IFNE/CARD11/MIR17HG	17
GO:0006816	GO:0006816	calcium ion transport	40/1060	267/12280	0.000398011	0.00632366	0.00494758	BAK1/CAMK2B/ATP2B4/PTGS2/CACNG4/P2RX5/ICAM1/ITPR3/PDGFB/BDKRB1/HOMER2/KCNN4/TGFB1/GRIN2D/PIK3CG/TSPAN13/CXCL12/CYP27B1/OPRD1/RGS4/FASLG/MCHR1/DIAPH1/TRPC4/FGF2/STAC2/CASQ1/GSTO1/UBASH3B/ATP2B2/PKD1L1/CACHD1/STC1/GEM/RRAD/TRPV3/IL1RAPL1/CHD7/BHLHA15/PDE4B	40
GO:0055024	GO:0055024	regulation of cardiac muscle tissue development	15/1060	66/12280	0.000400485	0.0063421	0.004962	JARID2/IGF1/EDN1/TGFB1/DKK1/RGS4/TBX2/BMP2/FGF2/MYOCD/CXADR/NRG1/GREM1/MIR222/MIR17HG	15
GO:0010544	GO:0010544	negative regulation of platelet activation	6/1060	13/12280	0.000411422	0.00643097	0.00503153	CD9/PDGFB/UBASH3B/PRKCD/THBD/PDGFA	6
GO:0043931	GO:0043931	ossification involved in bone maturation	6/1060	13/12280	0.000411422	0.00643097	0.00503153	IGF1/XYLT1/BMP2/GREM1/PHOSPHO1/RFLNB	6
GO:0045109	GO:0045109	intermediate filament organization	6/1060	13/12280	0.000411422	0.00643097	0.00503153	PKP1/DSP/NEFM/SHH/DES/EPPK1	6
GO:0072077	GO:0072077	renal vesicle morphogenesis	6/1060	13/12280	0.000411422	0.00643097	0.00503153	SOX8/SOX9/LIF/GREM1/GDNF/FMN1	6
GO:0055002	GO:0055002	striated muscle cell development	21/1060	110/12280	0.000413201	0.00643794	0.00503699	IGF1/EDN1/NFATC2/BVES/VEGFA/RGS4/FLNC/TBX3/ALPK3/TMOD1/MYPN/TPM1/MYOM3/CASQ1/ANKRD1/CXADR/ACTC1/PDLIM5/TCAP/NKX2-6/DNER	21
GO:0030514	GO:0030514	negative regulation of BMP signaling pathway	10/1060	34/12280	0.000421461	0.00652454	0.00510474	FSTL3/SMAD7/DKK1/SKIL/SMAD6/DLX1/GREM1/HTRA3/GREM2/SMURF1	10
GO:2000725	GO:2000725	regulation of cardiac muscle cell differentiation	10/1060	34/12280	0.000421461	0.00652454	0.00510474	IGF1/EDN1/TGFB1/DKK1/RGS4/BMP2/MYOCD/NRG1/GREM1/MIR222	10
GO:0055013	GO:0055013	cardiac muscle cell development	13/1060	53/12280	0.000439756	0.00675685	0.0052865	IGF1/EDN1/BVES/VEGFA/RGS4/TBX3/ALPK3/MYOM3/CXADR/ACTC1/PDLIM5/TCAP/NKX2-6	13
GO:0070663	GO:0070663	regulation of leukocyte proliferation	23/1060	126/12280	0.000440489	0.00675685	0.0052865	IGF1/GAL/NFATC2/TGFB1/HES1/TNFAIP3/CD274/IL1B/PTPN22/HAVCR2/IL6/SH3RF1/CASP3/SHH/GREM1/IL12A/GPR183/CLCF1/IRS2/SLC39A10/CARD11/PNP/CD24	23
GO:0060560	GO:0060560	developmental growth involved in morphogenesis	31/1060	191/12280	0.000440664	0.00675685	0.0052865	TNFRSF12A/TNC/FSTL4/GAL/MAP2/RIMS1/NRCAM/TGFB1/CXCL12/AREG/VEGFA/FGF1/TTL/ITGA4/TBX2/CPNE5/SOX9/NGF/SPRY2/SEMA6D/SEMA7A/AUTS2/DRAXIN/SHH/ISLR2/RAPH1/RIMS2/WNT7B/OSTN/SMURF1/FMN1	31
GO:0001666	GO:0001666	response to hypoxia	38/1060	251/12280	0.000446589	0.00678554	0.00530894	PTGS2/EDN1/NOX4/ICAM1/ANGPT2/HMOX1/HIF1A/ERCC2/TGFB1/CXCL12/BIRC2/PPARD/VEGFA/OPRD1/PGF/BMP2/ETS1/MYOCD/ANKRD1/MMP3/VEGFC/KCNMA1/MMP14/STC1/HK2/NPPC/ADORA1/ITGA2/CASP3/CLDN3/MMP10/NKX3-1/ANGPTL4/KCNK3/PLK3/PLEKHN1/MMP12/CD24	38
GO:0051101	GO:0051101	regulation of DNA binding	20/1060	103/12280	0.00044675	0.00678554	0.00530894	PLAUR/IGF1/HMOX1/ERCC2/DOT1L/TGFB1/MAPK8/HES1/ID3/ID1/LIF/HABP4/NGF/MYOCD/HMGA2/MSX1/ITGA2/HEY1/ID4/PINX1	20
GO:0051384	GO:0051384	response to glucocorticoid	20/1060	103/12280	0.00044675	0.00678554	0.00530894	PTGS2/EDN1/ICAM1/TGFB1/AREG/NR3C1/ERRFI1/DUSP1/FOSB/IL6/EIF4E/BMP6/PPARGC1B/STC1/CASP3/GJB2/NPAS4/FOSL1/WNT7B/NPAS4	20
GO:0002573	GO:0002573	myeloid leukocyte differentiation	25/1060	142/12280	0.000448636	0.00679283	0.00531465	FSTL3/TGFB1/CSF3/VEGFA/GPR68/INHBA/LIF/TSPAN2/EPHA2/PIK3R1/UBASH3B/KLF10/PPARGC1B/RUNX1/CSF2/DCSTAMP/GPR183/JUNB/ESRRA/TRIB1/NRROS/GATA2/CSF1R/EVI2B/SIGLEC15	25
GO:0050878	GO:0050878	regulation of body fluid levels	46/1060	322/12280	0.000451338	0.00681238	0.00532994	CD9/PLAUR/PRKCH/DGKD/EDN1/P2RX5/ITPR3/SERPIND1/PDGFB/HIF1A/DGKH/KCNN4/TFPI2/PIK3CG/SERPINE1/VWF/SH2B3/ADTRP/VEGFA/PRLR/SOCS2/WNK4/PRKCG/IL6/PIK3R1/FERMT3/UBASH3B/DGKI/XDH/CSRP1/HK2/ADORA1/PRKCD/ITGA2/SHH/MYO5B/HAS2/P2RY2/THBD/GATA2/CLDN4/PDGFA/SERPINB2/MAFK/ITGB3/ANXA8	46
GO:0051047	GO:0051047	positive regulation of secretion	40/1060	269/12280	0.00046418	0.0069844	0.00546453	SYT7/IGF1/RAB27B/GAL/IL4R/EDN1/EZR/HIF1A/FERMT1/KCNN4/TGFB1/STX1A/CXCL12/PPARD/IL1RL1/GPR68/CD274/INHBA/IL1B/PTPN22/HAVCR2/IL6/IL33/ANKRD1/VEGFC/BMP6/HK1/NLRP3/ADORA1/STXBP5/NKX3-1/GDNF/KISS1/C2CD2L/P2RY2/GATA2/CSF1R/IRS2/MMP12/DOC2B	40
GO:0030510	GO:0030510	regulation of BMP signaling pathway	14/1060	60/12280	0.000465709	0.00698563	0.00546549	FSTL3/SMAD7/DKK1/HES1/SKIL/SMAD6/DLX1/MSX1/GREM1/HTRA3/GREM2/HES5/SMURF1/FOXD1	14
GO:0090189	GO:0090189	regulation of branching involved in ureteric bud morphogenesis	7/1060	18/12280	0.000475637	0.00711247	0.00556473	SOX8/TGFB1/VEGFA/SOX9/GREM1/GDNF/TACSTD2	7
GO:0043009	GO:0043009	chordate embryonic development	61/1060	461/12280	0.000479274	0.0071269	0.00557602	MEOX1/SOX8/IGF1/PRDM1/TIE1/GLI2/PLXNA2/EDN1/TCF7/PDGFB/HIF1A/XYLT1/ERCC2/TGFB1/APBA1/DKK1/ZPR1/VEGFA/PCDH12/HES1/DLX2/SATB2/SNAI1/SOX9/VASP/BMP2/KLF2/LIF/TBX3/SKIL/TPM1/EPHA2/LMO4/DLX1/RSPO3/PTPRR/MMP14/MYO1E/MSX1/KBTBD8/CSF2/HEY1/SHH/DACT1/E2F7/SPINT1/NKX3-1/GBX2/JUNB/CHST11/CHD7/TCAP/FOSL1/GATA2/NKX2-6/SOCS3/JAG2/WNT7B/HES4/HES5/SCX	61
GO:0034765	GO:0034765	regulation of ion transmembrane transport	43/1060	296/12280	0.000479553	0.0071269	0.00557602	KCNG1/ATP2B4/GAL/CACNG4/ABCB1/KCNK6/BDKRB1/KCNA7/TGFB1/PIK3CG/TSPAN13/PPIF/ASIC2/KCNC4/RGS4/WNK4/DIAPH1/DLG4/HCN4/STAC2/CASQ1/GSTO1/KCNK13/UBASH3B/KCNMA1/KCNS2/KCNJ15/LRRC38/KCNF1/GEM/NETO1/RRAD/ADRB2/CLIC3/KCNS3/CHD7/PDZK1/SCN5A/PDE4B/KCNQ5/IRS2/ARC/SHANK3	43
GO:0048638	GO:0048638	regulation of developmental growth	38/1060	252/12280	0.000483361	0.00716146	0.00560306	TNFRSF12A/JARID2/IGF1/FSTL4/FGFR3/GAL/MAP2/EDN1/RIMS1/NRCAM/EZR/CXCL12/PPARD/VEGFA/WWC1/TTL/RGS4/SOCS2/TBX2/CPNE5/ATP8A2/NGF/SEMA6D/SEMA7A/FGF2/CXADR/DRAXIN/NPPC/ISLR2/ADRB2/CHD7/RIMS2/OSTN/DIO3/SMURF1/MIR222/MIR17HG/EPPK1	38
GO:0003208	GO:0003208	cardiac ventricle morphogenesis	12/1060	47/12280	0.000488845	0.00722055	0.00564929	DSP/HIF1A/SMAD7/PPP1R13L/TGFB1/DLL4/TPM1/NRG1/HEYL/HEY1/CHD7/MIR17HG	12
GO:0090101	GO:0090101	negative regulation of transmembrane receptor protein serine/threonine kinase signaling pathway	18/1060	89/12280	0.000509317	0.0075	0.00586793	FSTL3/SMAD7/TGFB1/DKK1/SNX25/PMEPA1/SKIL/SMAD6/PRDM16/DLX1/GREM1/HTRA3/CHST11/NRROS/GREM2/ADAMTSL2/SMURF1/MIR17HG	18
GO:0009792	GO:0009792	embryo development ending in birth or egg hatching	62/1060	472/12280	0.000524346	0.00764426	0.0059808	MEOX1/SOX8/IGF1/PRDM1/TIE1/GLI2/PLXNA2/EDN1/TCF7/PDGFB/HIF1A/XYLT1/ERCC2/TGFB1/APBA1/DKK1/ZPR1/VEGFA/PCDH12/HES1/DLX2/NR5A2/SATB2/SNAI1/SOX9/VASP/BMP2/KLF2/LIF/TBX3/SKIL/TPM1/EPHA2/LMO4/DLX1/RSPO3/PTPRR/MMP14/MYO1E/MSX1/KBTBD8/CSF2/HEY1/SHH/DACT1/E2F7/SPINT1/NKX3-1/GBX2/JUNB/CHST11/CHD7/TCAP/FOSL1/GATA2/NKX2-6/SOCS3/JAG2/WNT7B/HES4/HES5/SCX	62
GO:0002548	GO:0002548	monocyte chemotaxis	9/1060	29/12280	0.000526162	0.00764426	0.0059808	PDGFB/FLT1/SERPINE1/CXCL12/CCL7/CCL20/DUSP1/IL6/GREM1	9
GO:0038066	GO:0038066	p38MAPK cascade	11/1060	41/12280	0.0005275	0.00764426	0.0059808	MAP2K3/EZR/GADD45B/VEGFA/DUSP1/IL1B/BMP2/GADD45G/PTPN22/XDH/MIR138-1	11
GO:0061005	GO:0061005	cell differentiation involved in kidney development	11/1060	41/12280	0.0005275	0.00764426	0.0059808	PDGFB/HES1/LIF/PODXL/MYO1E/SHH/GREM1/GDNF/MTSS1/GPR4/CD24	11
GO:0022408	GO:0022408	negative regulation of cell-cell adhesion	21/1060	112/12280	0.000531392	0.00764426	0.0059808	CD9/RUNX3/CBFB/IL4R/SMAD7/TGFB1/CXCL12/GTPBP4/ADTRP/CD274/BMP2/PODXL/PTPN22/HAVCR2/UBASH3B/RUNX1/PRKCD/CASP3/SHH/MIR222/MIR221	21
GO:0050727	GO:0050727	regulation of inflammatory response	33/1060	210/12280	0.000531529	0.00764426	0.0059808	BIRC3/TNFRSF1B/PTGS2/MGLL/PIK3CG/SERPINE1/BIRC2/PPARD/IL1RL2/IL1RL1/TNFAIP3/TNFAIP6/IL1B/ETS1/NT5E/IL6/IL33/SEMA7A/SUSD4/NFKBIZ/MMP3/MAPK13/NLRP3/ADORA1/PRKCD/ITGA2/METRNL/C5orf30/SOCS3/FAM19A3/TGM2/MIR222/MIR221	33
GO:0036293	GO:0036293	response to decreased oxygen levels	39/1060	262/12280	0.00053227	0.00764426	0.0059808	PTGS2/EDN1/NOX4/ICAM1/ANGPT2/HMOX1/HIF1A/ERCC2/TGFB1/CXCL12/BIRC2/PPARD/VEGFA/CPEB4/OPRD1/PGF/BMP2/ETS1/MYOCD/ANKRD1/MMP3/VEGFC/KCNMA1/MMP14/STC1/HK2/NPPC/ADORA1/ITGA2/CASP3/CLDN3/MMP10/NKX3-1/ANGPTL4/KCNK3/PLK3/PLEKHN1/MMP12/CD24	39
GO:0060415	GO:0060415	muscle tissue morphogenesis	13/1060	54/12280	0.000534151	0.00764426	0.0059808	DSP/SMAD7/TGFB1/BMP2/DLL4/TPM1/MYOM3/ANKRD1/NRG1/ACTC1/XIRP2/CHD7/TCAP	13
GO:1903035	GO:1903035	negative regulation of response to wounding	13/1060	54/12280	0.000534151	0.00764426	0.0059808	CD9/PLAUR/EDN1/PDGFB/SERPINE1/ADTRP/FGF2/UBASH3B/PRKCD/THBD/PDGFA/SERPINB2/EPPK1	13
GO:0072089	GO:0072089	stem cell proliferation	17/1060	82/12280	0.00053494	0.00764426	0.0059808	ABCB1/HIF1A/FERMT1/TGFB1/VEGFA/NUMB/TBX3/FGF2/HMGA2/VEGFC/RUNX1/HHIP/SHH/ID4/WNT7B/MIR222/MIR221	17
GO:0071900	GO:0071900	regulation of protein serine/threonine kinase activity	55/1060	407/12280	0.000538384	0.00767079	0.00600155	IGF1/MAP2K3/ATP2B4/EDN1/NOX4/GADD45B/PDGFB/FLT1/TGFB1/PIK3CG/GTPBP4/DKK1/VEGFA/FGF1/RGS4/TNFAIP3/DUSP1/DUSP4/IL1B/BMP2/GADD45G/IRAK2/PTPN22/NGF/SPRY2/DUSP5/FGF2/RGS3/MYOCD/PTPRJ/FGF18/NRG1/DUSP2/DIRAS3/TGFA/ADORA1/NEK10/PRKCD/DUSP7/CASP3/RET/MLKL/ADRB2/PKIA/TRIB1/CSPG4/FZD8/ERN1/CSF1R/SPRY4/WNT7B/SERTAD1/PDGFA/IPO7/CD24	55
GO:0007409	GO:0007409	axonogenesis	50/1060	361/12280	0.000540616	0.00767992	0.0060087	TNFRSF12A/NRXN3/FSTL4/CRMP1/PICALM/GLI2/PLXNA2/RAP1GAP/MAP2/NRCAM/EZR/DOK5/CXCL12/VEGFA/TTL/ITGA4/NR4A3/VASP/MAP1S/ATP8A2/NUMB/NGF/SKIL/SEMA6D/SPTBN5/MYPN/SEMA7A/BMPR1B/PIK3R1/SHC3/EPHB1/AUTS2/ZSWIM5/DRAXIN/NTNG1/SHH/DRGX/RET/ISLR2/GBX2/GDNF/B3GNT2/CDH2/RAPH1/FBXO45/CSF1R/IRS2/COL25A1/SHANK3/FOXD1	50
GO:1900744	GO:1900744	regulation of p38MAPK cascade	10/1060	35/12280	0.000544954	0.00771885	0.00603916	EZR/GADD45B/VEGFA/DUSP1/IL1B/BMP2/GADD45G/PTPN22/XDH/MIR138-1	10
GO:0042303	GO:0042303	molting cycle	16/1060	75/12280	0.000553651	0.00777365	0.00608203	NSUN2/GAL/PTGS2/FERMT1/PPP1R13L/ERCC2/DKK1/INHBA/SNAI1/SOX9/KRT33B/ARNTL/SHH/TRPV3/PDGFA/KRTAP4-9	16
GO:0042633	GO:0042633	hair cycle	16/1060	75/12280	0.000553651	0.00777365	0.00608203	NSUN2/GAL/PTGS2/FERMT1/PPP1R13L/ERCC2/DKK1/INHBA/SNAI1/SOX9/KRT33B/ARNTL/SHH/TRPV3/PDGFA/KRTAP4-9	16
GO:0050671	GO:0050671	positive regulation of lymphocyte proliferation	16/1060	75/12280	0.000553651	0.00777365	0.00608203	IGF1/NFATC2/HES1/CD274/IL1B/HAVCR2/IL6/SHH/IL12A/GPR183/CLCF1/IRS2/SLC39A10/CARD11/PNP/CD24	16
GO:0006939	GO:0006939	smooth muscle contraction	15/1060	68/12280	0.000562331	0.00787264	0.00615948	PTGS2/EDN1/COMP/TACR1/CNN1/MYOCD/DOCK5/KCNMA1/ADORA1/ITGA2/GDNF/ADRB2/SPHK1/HTR1D/SMTN	15
GO:1903034	GO:1903034	regulation of response to wounding	20/1060	105/12280	0.000579082	0.00808371	0.00632462	TNFRSF12A/CD9/PLAUR/EDN1/PDGFB/SERPINE1/ADTRP/PPARD/HBEGF/TNFAIP3/FGF2/UBASH3B/PRKCD/FOXC2/THBD/PDGFA/SERPINB2/MIR222/MIR221/EPPK1	20
GO:0072503	GO:0072503	cellular divalent inorganic cation homeostasis	41/1060	281/12280	0.000587513	0.00817777	0.00639821	BAK1/ATP2B4/EDN1/P2RX5/ITPR3/BDKRB1/TGFB1/GRIN2D/PIK3CG/CXCL12/CCL7/SLC30A3/TACR1/FASLG/PTGFR/MT2A/MCHR1/DIAPH1/DLG4/TRPC4/ATP13A3/FGF2/CASQ1/ABL2/GSTO1/UBASH3B/ATP2B2/STC1/ADORA1/MT1E/KISS1/KCNK3/CHD7/CALB2/GPR4/GATA2/GPR157/MT1X/SLC39A10/TGM2/CD24	41
GO:0021953	GO:0021953	central nervous system neuron differentiation	21/1060	113/12280	0.000600788	0.00833852	0.00652398	GLI2/MAP2/DKK1/HES1/DLX2/CHD5/SATB2/INHBA/DLL4/LMO4/DLX1/EPHB1/DRAXIN/SHH/GBX2/ID4/FBXO45/GATA2/CSF1R/HES5/SHANK3	21
GO:0019932	GO:0019932	second-messenger-mediated signaling	38/1060	255/12280	0.000610341	0.00844684	0.00660873	IGF1/ATP2B4/GAL/LMCD1/DGKD/EDN1/P2RX5/LAT2/PTHLH/ITPR3/RASD2/NFATC2/HOMER2/NCALD/GRIN2D/RASD1/VEGFA/CCL20/NR5A2/PTGFR/SOX9/CASQ1/UCN2/GSTO1/PTPRJ/NRG1/ADGRL4/NPPC/ADRB2/CXCL8/ADRA1D/PDE3A/ADGRG2/MCTP1/SPHK1/RIMS2/BHLHA15/GPR3	38
GO:0055001	GO:0055001	muscle cell development	22/1060	121/12280	0.000614737	0.00848337	0.00663731	IGF1/EDN1/NFATC2/BVES/VEGFA/HES1/RGS4/FLNC/TBX3/ALPK3/TMOD1/MYPN/TPM1/MYOM3/CASQ1/ANKRD1/CXADR/ACTC1/PDLIM5/TCAP/NKX2-6/DNER	22
GO:0003205	GO:0003205	cardiac chamber development	23/1060	129/12280	0.000621825	0.00855673	0.00669471	ADAMTS6/PRDM1/DSP/HIF1A/SMAD7/PPP1R13L/TGFB1/HES1/TBX2/DLL4/TBX3/SMAD6/STRA6/TPM1/MYOCD/LMO4/NRG1/XIRP2/HEYL/HEY1/CHD7/SCN5A/MIR17HG	23
GO:0045124	GO:0045124	regulation of bone resorption	8/1060	24/12280	0.0006289	0.00862951	0.00675165	TNFAIP3/IL6/UBASH3B/PPARGC1B/DCSTAMP/CSF1R/SIGLEC15/ITGB3	8
GO:0090092	GO:0090092	regulation of transmembrane receptor protein serine/threonine kinase signaling pathway	28/1060	170/12280	0.000643628	0.00879172	0.00687856	FSTL3/FERMT1/SMAD7/TGFB1/DKK1/SNX25/HES1/INHBA/PMEPA1/BMP2/SKIL/SMAD6/MYOCD/PRDM16/DLX1/BMP6/MSX1/SHH/GREM1/HTRA3/CHST11/NRROS/GREM2/ADAMTSL2/HES5/SMURF1/MIR17HG/FOXD1	28
GO:1990266	GO:1990266	neutrophil migration	13/1060	55/12280	0.000645123	0.00879172	0.00687856	EDN1/CXCL2/PIK3CG/CCL7/CCL20/CXCL6/IL1B/ITGA9/CXADR/CXCL3/CXCL5/CXCL8/PDE4B	13
GO:0032946	GO:0032946	positive regulation of mononuclear cell proliferation	16/1060	76/12280	0.000646182	0.00879172	0.00687856	IGF1/NFATC2/HES1/CD274/IL1B/HAVCR2/IL6/SHH/IL12A/GPR183/CLCF1/IRS2/SLC39A10/CARD11/PNP/CD24	16
GO:0042100	GO:0042100	B cell proliferation	11/1060	42/12280	0.000659725	0.00892806	0.00698524	NFATC2/PLCL2/PRKCD/CASP3/GPR183/CTPS1/CLCF1/IFNE/IRS2/SLC39A10/CARD11	11
GO:0007411	GO:0007411	axon guidance	32/1060	204/12280	0.00066141	0.00892806	0.00698524	NRXN3/CRMP1/GLI2/PLXNA2/RAP1GAP/NRCAM/EZR/DOK5/CXCL12/VEGFA/NR4A3/VASP/SEMA6D/SPTBN5/MYPN/SEMA7A/BMPR1B/PIK3R1/SHC3/EPHB1/ZSWIM5/DRAXIN/SHH/DRGX/RET/GBX2/GDNF/B3GNT2/CSF1R/IRS2/SHANK3/FOXD1	32
GO:0046849	GO:0046849	bone remodeling	14/1060	62/12280	0.000663597	0.00892806	0.00698524	SYT7/NOX4/TGFB1/TNFAIP3/IL6/EPHA2/UBASH3B/PPARGC1B/DCSTAMP/GREM1/ADRB2/CSF1R/SIGLEC15/ITGB3	14
GO:0110110	GO:0110110	positive regulation of animal organ morphogenesis	14/1060	62/12280	0.000663597	0.00892806	0.00698524	SOX8/EDN1/TGFB1/DKK1/VEGFA/FGF1/TNFAIP3/SOX9/BMP2/LIF/ENAM/GREM1/GDNF/ODAPH	14
GO:0072087	GO:0072087	renal vesicle development	6/1060	14/12280	0.00066761	0.0089571	0.00700796	SOX8/SOX9/LIF/GREM1/GDNF/FMN1	6
GO:0033628	GO:0033628	regulation of cell adhesion mediated by integrin	9/1060	30/12280	0.00069474	0.00929527	0.00727254	FERMT1/PIK3CG/SERPINE1/LPXN/PODXL/EPHA2/FERMT3/RET/FOXC2	9
GO:0050854	GO:0050854	regulation of antigen receptor-mediated signaling pathway	10/1060	36/12280	0.00069694	0.00929895	0.00727541	PRKCH/CBFB/EZR/KCNN4/LPXN/PTPN22/PTPRJ/PLCL2/RUNX1/SLC39A10	10
GO:0016049	GO:0016049	cell growth	53/1060	393/12280	0.000707925	0.0094195	0.00736973	TNFRSF12A/IGF1/FSTL4/DCBLD2/GAL/MAP2/EDN1/RIMS1/EPB41L3/NRCAM/BDKRB1/TGFB1/CXCL12/CAPRIN2/CYP27B1/PPARD/VEGFA/HBEGF/TTL/ITGA4/RGS4/RPS6KA1/SGK1/SOCS2/INHBA/CPNE5/SOX9/NGF/SEMA6D/SEMA7A/MYOCD/PTPRJ/MMP14/AUTS2/DRAXIN/PDLIM5/MSX1/ESM1/OSGIN2/DCSTAMP/GREM1/ISLR2/GNG4/MINAR1/HTRA3/RAPH1/NET1/SPHK1/RIMS2/RPS6KA3/SERTAD2/OSTN/SMURF1	53
GO:0097485	GO:0097485	neuron projection guidance	32/1060	205/12280	0.000720648	0.00956244	0.00748157	NRXN3/CRMP1/GLI2/PLXNA2/RAP1GAP/NRCAM/EZR/DOK5/CXCL12/VEGFA/NR4A3/VASP/SEMA6D/SPTBN5/MYPN/SEMA7A/BMPR1B/PIK3R1/SHC3/EPHB1/ZSWIM5/DRAXIN/SHH/DRGX/RET/GBX2/GDNF/B3GNT2/CSF1R/IRS2/SHANK3/FOXD1	32
GO:0051148	GO:0051148	negative regulation of muscle cell differentiation	12/1060	49/12280	0.000734848	0.00972416	0.00760809	PDGFB/NFATC2/DKK1/RGS4/EREG/BMP2/MYOCD/MSX1/SHH/BHLHA15/MIR222/MIR221	12
GO:0060541	GO:0060541	respiratory system development	26/1060	155/12280	0.000747269	0.0098615	0.00771555	TNC/FSTL3/JMJD6/GLI2/CRISPLD2/VEGFA/FGF1/HES1/ERRFI1/SOX9/ID1/KLF2/LIF/SPRY2/STRA6/MYOCD/EIF4E/FGF18/MMP14/HHIP/SHH/CHD7/WNT7B/PDGFA/ADAMTSL2/MIR17HG	26
GO:0031644	GO:0031644	regulation of neurological system process	16/1060	77/12280	0.000751604	0.00986481	0.00771813	MGLL/CACNG4/EDN1/RIMS1/GRIN2D/STX1A/OPRD1/RGS4/DLG4/ADORA1/ITGA2/FABP5/NETO1/ADRB2/RIMS2/SHANK3	16
GO:0051153	GO:0051153	regulation of striated muscle cell differentiation	16/1060	77/12280	0.000751604	0.00986481	0.00771813	IGF1/IL4R/EDN1/NFATC2/TGFB1/DKK1/RGS4/BMP2/MYOCD/NRG1/MMP14/MSX1/SHH/GREM1/BHLHA15/MIR222	16
GO:0010001	GO:0010001	glial cell differentiation	25/1060	147/12280	0.000761797	0.00993921	0.00777635	SOX8/CD9/HDAC10/ERCC2/TGFB1/HES1/DLX2/SOX9/BMP2/LIF/TRPC4/TSPAN2/FGF5/DLX1/NRG1/SHH/SPINT1/CDH2/ID4/NRROS/CLCF1/GPR157/DNER/HES5/ZNF488	25
GO:0010466	GO:0010466	negative regulation of peptidase activity	25/1060	147/12280	0.000761797	0.00993921	0.00777635	PLAUR/BIRC3/PTGS2/PICALM/SERPIND1/TIMP3/CST4/TIMP1/TFPI2/SERPINE1/BIRC2/VEGFA/RPS6KA1/NGF/SH3RF1/SPINT1/SERPINB8/SERPINA9/CST1/CST6/RPS6KA3/UMODL1/SERPINB2/ANXA8L1/ANXA8	25
GO:0045216	GO:0045216	cell-cell junction organization	21/1060	115/12280	0.000763447	0.00993921	0.00777635	CD9/PRKCH/CBFB/PKP1/EPB41L3/DSP/TGFB1/CDH6/SNAI1/EPHA2/CXADR/F11R/RUNX1/XIRP2/CLDN3/GJB2/PLEKHA7/CDH2/GPBAR1/CSF1R/GJC1	21
GO:0030900	GO:0030900	forebrain development	39/1060	267/12280	0.000773949	0.0100489	0.00786213	PHLPP2/ATP2B4/GLI2/HIF1A/CXCL12/DKK1/HES1/DLX2/CHD5/SATB2/NR4A3/INHBA/BMP2/NUMB/ETS1/TBX3/SEMA7A/SSTR1/BCL2A1/DLX1/NRG1/DRAXIN/MSX1/CASP3/SHH/MFSD2A/GBX2/CDH2/CHD7/ID4/FBXO45/MYO1D/GATA2/NKX2-6/CSF1R/SCN5A/WNT7B/HES5/SHANK3	39
GO:0048598	GO:0048598	embryonic morphogenesis	57/1060	432/12280	0.000778749	0.0100841	0.00788969	SOX8/GLI2/EDN1/TCF7/HIF1A/FLT1/TGFB1/DKK1/HES1/ITGA4/DLX2/SATB2/NR4A3/TBX2/INHBA/SNAI1/SOX9/VASP/DLL4/ATP8A2/MICAL2/TBX3/SPRY2/STRA6/FGF2/EPHA2/LMO4/RSPO3/HMGA2/VEGFC/MMP14/ITGA5/ZNF281/MSX1/ITGA2/SHH/DACT1/RET/SPINT1/GREM1/GBX2/GDNF/ATOH8/SOX7/CHST11/CHD7/TCAP/GATA2/GREM2/SOCS3/JAG2/WNT7B/LAMB3/HES5/MIR221/ITGB3/SCX	57
GO:1903845	GO:1903845	negative regulation of cellular response to transforming growth factor beta stimulus	14/1060	63/12280	0.000786654	0.0101592	0.00794846	SMAD7/TGFB1/SNX25/PMEPA1/SKIL/SMAD6/PRDM16/DLX1/HTRA3/CHST11/NRROS/ADAMTSL2/SMURF1/MIR17HG	14
GO:0003179	GO:0003179	heart valve morphogenesis	11/1060	43/12280	0.000818396	0.0105409	0.00824713	ELN/TGFB1/SNAI1/SOX9/BMP2/DLL4/SMAD6/STRA6/HEYL/HEY1/SCX	11
GO:0071559	GO:0071559	response to transforming growth factor beta	31/1060	198/12280	0.000823123	0.0105736	0.00827271	RUNX3/EDN1/NOX4/PXN/FERMT1/SMAD7/TGFB1/SNX25/NR3C1/SMAD9/PMEPA1/SOX9/ID1/SKIL/SMAD6/BMPR1B/MYOCD/PRDM16/DLX1/ANKRD1/KLF10/F11R/LIMS1/HTRA3/CHST11/PDE3A/NRROS/ADAMTSL2/SMURF1/MIR17HG/SCX	31
GO:0072216	GO:0072216	positive regulation of metanephros development	5/1060	10/12280	0.000827063	0.0105961	0.00829026	PDGFB/LIF/RET/GDNF/PDGFA	5
GO:0007157	GO:0007157	heterophilic cell-cell adhesion via plasma membrane cell adhesion molecules	8/1060	25/12280	0.000855585	0.0109325	0.00855347	ICAM1/AMIGO2/NECTIN4/CXADR/ITGA5/IL1RAPL1/CDH2/TENM3	8
GO:0071407	GO:0071407	cellular response to organic cyclic compound	55/1060	415/12280	0.000861081	0.0109737	0.0085857	TNC/ATP2B4/CBFB/PTGS2/GLI2/EDN1/NOX4/ICAM1/ITGA6/EZR/PDGFB/TGFB1/PIK3CG/CYP27B1/ADTRP/PPARD/NR3C1/ERRFI1/NR5A2/ID3/NR4A3/INHBA/NR4A1/PMEPA1/IL1B/BMP2/ID1/RAP1B/KLF2/CCDC62/DIAPH1/ARNTL/HCN4/SSTR1/NPC1/MSN/ANKRD1/EIF4E/PPARGC1B/GRIP1/STC1/RUNX1/HEYL/ITGA2/CASP3/GJB2/NKX3-1/PDE3A/ESRRA/NPAS4/P2RY2/PDE4B/NCOR2/SLC26A6/NPAS4	55
GO:0070665	GO:0070665	positive regulation of leukocyte proliferation	16/1060	78/12280	0.000871331	0.0110751	0.00866504	IGF1/NFATC2/HES1/CD274/IL1B/HAVCR2/IL6/SHH/IL12A/GPR183/CLCF1/IRS2/SLC39A10/CARD11/PNP/CD24	16
GO:0006940	GO:0006940	regulation of smooth muscle contraction	10/1060	37/12280	0.000882209	0.0111255	0.0087045	PTGS2/EDN1/TACR1/CNN1/MYOCD/DOCK5/ADORA1/ITGA2/ADRB2/SPHK1	10
GO:0032663	GO:0032663	regulation of interleukin-2 production	10/1060	37/12280	0.000882209	0.0111255	0.0087045	NAV3/EZR/HOMER2/CD83/TNFAIP3/IL1B/HAVCR2/RUNX1/PDE4B/CARD11	10
GO:0061614	GO:0061614	pri-miRNA transcription by RNA polymerase II	10/1060	37/12280	0.000882209	0.0111255	0.0087045	PDGFB/HIF1A/TGFB1/PPARD/SOX9/BMP2/ETS1/SMAD6/FOSL1/GATA2	10
GO:0030225	GO:0030225	macrophage differentiation	9/1060	31/12280	0.000904896	0.0113229	0.00885895	TGFB1/VEGFA/INHBA/LIF/TSPAN2/TRIB1/NRROS/GATA2/CSF1R	9
GO:0043370	GO:0043370	regulation of CD4-positive, alpha-beta T cell differentiation	9/1060	31/12280	0.000904896	0.0113229	0.00885895	RUNX3/CBFB/IL4R/SMAD7/CD83/NFKBIZ/SH3RF1/RUNX1/NLRP3	9
GO:0046638	GO:0046638	positive regulation of alpha-beta T cell differentiation	9/1060	31/12280	0.000904896	0.0113229	0.00885895	RUNX3/CBFB/IL4R/CD83/NFKBIZ/RUNX1/NLRP3/SHH/PNP	9
GO:0099565	GO:0099565	chemical synaptic transmission, postsynaptic	15/1060	71/12280	0.000907915	0.0113313	0.00886554	RIMS1/P2RX5/GRIN2D/STX1A/RGS4/DLG4/DGKI/ADORA1/NETO1/ADRB2/NPAS4/RIMS2/INSYN2/SHANK3/NPAS4	15
GO:0060079	GO:0060079	excitatory postsynaptic potential	14/1060	64/12280	0.00092843	0.0115575	0.0090425	RIMS1/P2RX5/GRIN2D/STX1A/RGS4/DLG4/DGKI/ADORA1/NETO1/ADRB2/NPAS4/RIMS2/SHANK3/NPAS4	14
GO:2000181	GO:2000181	negative regulation of blood vessel morphogenesis	17/1060	86/12280	0.000946414	0.011729	0.00917669	TIE1/ANGPT2/SERPINE1/FASLG/KLF2/DLL4/SPRY2/EPHA2/XDH/MINAR1/MMRN2/GPR4/MIR377/MIR222/MIR221/MIR138-1/MIR29A	17
GO:1903532	GO:1903532	positive regulation of secretion by cell	37/1060	252/12280	0.000947065	0.011729	0.00917669	SYT7/IGF1/RAB27B/GAL/IL4R/EDN1/EZR/HIF1A/FERMT1/KCNN4/TGFB1/STX1A/CXCL12/PPARD/IL1RL1/GPR68/CD274/INHBA/PTPN22/HAVCR2/IL6/IL33/ANKRD1/VEGFC/BMP6/HK1/NLRP3/STXBP5/NKX3-1/GDNF/KISS1/C2CD2L/GATA2/CSF1R/IRS2/MMP12/DOC2B	37
GO:0071804	GO:0071804	cellular potassium ion transport	21/1060	117/12280	0.000962811	0.0118632	0.00928166	KCNG1/GAL/SLC1A3/KCNK6/KCNN4/KCNA7/KCNC4/RGS4/WNK4/HCN4/KCNK13/KCNMA1/KCNS2/KCNJ15/LRRC38/KCNF1/NETO1/KCNK9/KCNS3/KCNK3/KCNQ5	21
GO:0071805	GO:0071805	potassium ion transmembrane transport	21/1060	117/12280	0.000962811	0.0118632	0.00928166	KCNG1/GAL/SLC1A3/KCNK6/KCNN4/KCNA7/KCNC4/RGS4/WNK4/HCN4/KCNK13/KCNMA1/KCNS2/KCNJ15/LRRC38/KCNF1/NETO1/KCNK9/KCNS3/KCNK3/KCNQ5	21
GO:0050863	GO:0050863	regulation of T cell activation	31/1060	200/12280	0.000975754	0.0119921	0.0093825	IGF1/RUNX3/PRDM1/CBFB/GLI2/IL4R/NFATC2/SMAD7/TGFB1/CD83/VNN1/HES1/IL1RL2/CD274/IL1B/PTPN22/HAVCR2/IL6/NFKBIZ/PIK3R1/SH3RF1/RUNX1/NLRP3/CASP3/SHH/IL12A/EGR3/TNFRSF18/CARD11/PNP/CD24	31
GO:0050926	GO:0050926	regulation of positive chemotaxis	7/1060	20/12280	0.000993611	0.0121497	0.00950583	ANGPT2/CXCL12/VEGFA/PGF/VEGFC/ITGA2/CXCL8	7
GO:0061217	GO:0061217	regulation of mesonephros development	7/1060	20/12280	0.000993611	0.0121497	0.00950583	SOX8/TGFB1/VEGFA/SOX9/GREM1/GDNF/TACSTD2	7
GO:0032623	GO:0032623	interleukin-2 production	11/1060	44/12280	0.00100742	0.0122875	0.00961365	NAV3/EZR/HOMER2/CD83/TNFAIP3/IL1B/HAVCR2/RUNX1/PDE4B/CARD11/PNP	11
GO:0071560	GO:0071560	cellular response to transforming growth factor beta stimulus	30/1060	192/12280	0.00102451	0.0124645	0.0097521	EDN1/NOX4/PXN/FERMT1/SMAD7/TGFB1/SNX25/NR3C1/SMAD9/PMEPA1/SOX9/ID1/SKIL/SMAD6/BMPR1B/MYOCD/PRDM16/DLX1/ANKRD1/KLF10/F11R/LIMS1/HTRA3/CHST11/PDE3A/NRROS/ADAMTSL2/SMURF1/MIR17HG/SCX	30
GO:0030168	GO:0030168	platelet activation	19/1060	102/12280	0.0010425	0.0126514	0.00989833	CD9/PRKCH/DGKD/ITPR3/PDGFB/DGKH/PIK3CG/VWF/PRKCG/IL6/PIK3R1/FERMT3/UBASH3B/DGKI/CSRP1/PRKCD/THBD/PDGFA/ITGB3	19
GO:0010951	GO:0010951	negative regulation of endopeptidase activity	24/1060	142/12280	0.00105249	0.0127407	0.00996821	PLAUR/BIRC3/PTGS2/PICALM/SERPIND1/TIMP3/CST4/TIMP1/TFPI2/SERPINE1/BIRC2/VEGFA/RPS6KA1/NGF/SH3RF1/SPINT1/SERPINB8/SERPINA9/CST1/CST6/RPS6KA3/SERPINB2/ANXA8L1/ANXA8	24
GO:0035710	GO:0035710	CD4-positive, alpha-beta T cell activation	13/1060	58/12280	0.00110086	0.0132559	0.0103713	RUNX3/CBFB/IL4R/SMAD7/CD83/CD274/IL6/NFKBIZ/SH3RF1/RUNX1/NLRP3/IL12A/GPR183	13
GO:0055006	GO:0055006	cardiac cell development	13/1060	58/12280	0.00110086	0.0132559	0.0103713	IGF1/EDN1/BVES/VEGFA/RGS4/TBX3/ALPK3/MYOM3/CXADR/ACTC1/PDLIM5/TCAP/NKX2-6	13
GO:0046635	GO:0046635	positive regulation of alpha-beta T cell activation	10/1060	38/12280	0.00110603	0.0132559	0.0103713	RUNX3/CBFB/IL4R/CD83/NFKBIZ/RUNX1/NLRP3/SHH/IL12A/PNP	10
GO:2000514	GO:2000514	regulation of CD4-positive, alpha-beta T cell activation	10/1060	38/12280	0.00110603	0.0132559	0.0103713	RUNX3/CBFB/IL4R/SMAD7/CD83/CD274/NFKBIZ/SH3RF1/RUNX1/NLRP3	10
GO:0001893	GO:0001893	maternal placenta development	8/1060	26/12280	0.0011434	0.0136699	0.0106952	PRDM1/PTGS2/CYP27B1/PPARD/LIF/STC1/GJB2/JUNB	8
GO:0001938	GO:0001938	positive regulation of endothelial cell proliferation	16/1060	80/12280	0.00115988	0.0137779	0.0107797	HMOX1/PDGFB/HIF1A/CXCL12/VEGFA/ITGA4/PGF/NR4A1/BMP2/FGF2/VEGFC/BMP6/GATA2/EGR3/ITGB3/MIR29A	16
GO:0046854	GO:0046854	phosphatidylinositol phosphorylation	16/1060	80/12280	0.00115988	0.0137779	0.0107797	FGFR3/EFR3B/PDGFB/PIK3CG/HBEGF/FGF1/SOCS2/EREG/FGF5/FGF2/PIK3R1/FGF18/NRG1/SOCS3/IRS2/PDGFA	16
GO:0014911	GO:0014911	positive regulation of smooth muscle cell migration	9/1060	32/12280	0.00116385	0.0137779	0.0107797	IGF1/NOX4/PDGFB/NR4A3/SEMA6D/DOCK5/ITGA2/HAS2/MIR221	9
GO:0060986	GO:0060986	endocrine hormone secretion	9/1060	32/12280	0.00116385	0.0137779	0.0107797	GAL/INHBA/IL1B/TBX3/REN/BMP6/NKX3-1/KISS1/FOXD1	9
GO:0048871	GO:0048871	multicellular organismal homeostasis	43/1060	309/12280	0.00117012	0.0138182	0.0108113	USH2A/PTGS2/IL4R/NOX4/CST4/HOMER2/PPP1R13L/VEGFA/PRLR/TNFAIP3/NR4A3/G0S2/SOX9/IL1B/ID1/GADD45G/ARNTL/AMPD3/IL6/PRDM16/BMP6/UBASH3B/CXADR/PLCL2/PPARGC1B/ACOT11/ADORA1/FABP5/DCSTAMP/MYO5B/ADRB2/HAS2/GATM/FOXC2/METRNL/GATA2/GPR3/CSF1R/CLDN4/SIGLEC15/DIO2/ITGB3/SCX	43
GO:0060485	GO:0060485	mesenchyme development	32/1060	211/12280	0.00118392	0.0139472	0.0109122	MEOX1/SOX8/EDN1/HIF1A/SMAD7/TGFB1/HES1/TBX2/SNAI1/SOX9/IL1B/BMP2/SEMA6D/SEMA7A/HMGA2/NRG1/ACTC1/MSX1/KBTBD8/HEYL/HEY1/SHH/RET/GREM1/GBX2/GDNF/HAS2/RFLNB/MIR222/MIR221/FOXD1/SCX	32
GO:0071248	GO:0071248	cellular response to metal ion	22/1060	127/12280	0.0012007	0.0141104	0.0110398	SYT7/FSTL3/PTGS2/EDN1/HMOX1/RASA4/MAPK8/PPIF/CPNE5/MT2A/FOSB/DLG4/ALOX5AP/BMP6/SHH/MT1E/JUNB/KCNK3/SYT12/SCN5A/MT1X/SYT15	22
GO:0001933	GO:0001933	negative regulation of protein phosphorylation	46/1060	337/12280	0.00120718	0.0141521	0.0110725	BAK1/RPS6KA6/EZR/GADD45B/TIMP3/BDKRB1/SMAD7/TGFB1/DKK1/SNX25/CBLB/ERRFI1/RGS4/TNFAIP3/DUSP1/DUSP4/PMEPA1/IL1B/LIF/PTPN22/PRR5L/SPRY2/SMAD6/DUSP5/RGS3/MYOCD/PTPRJ/PTPRR/UBASH3B/DUSP2/XDH/PRKCD/DUSP7/CASP3/DACT1/GREM1/PKIA/TRIB1/SH3BP5L/SOCS3/C1QL4/SPRY4/IPO7/MIR221/MIR138-1/DBNDD2	46
GO:0050918	GO:0050918	positive chemotaxis	11/1060	45/12280	0.00123108	0.0143626	0.0112372	ANGPT2/PDGFB/CXCL12/VEGFA/PGF/FGF2/PTPRJ/VEGFC/ITGA2/GDNF/CXCL8	11
GO:1901862	GO:1901862	negative regulation of muscle tissue development	11/1060	45/12280	0.00123108	0.0143626	0.0112372	JARID2/TGFB1/DKK1/RGS4/BMP2/MYOCD/CXADR/EPHB1/SHH/MIR222/MIR17HG	11
GO:1903510	GO:1903510	mucopolysaccharide metabolic process	17/1060	88/12280	0.00123755	0.0144033	0.011269	ST3GAL1/VCAN/PDGFB/XYLT1/TGFB1/CHST3/IL1B/CEMIP2/FGF2/ST3GAL2/CSGALNACT2/B3GNT2/HAS2/CHST11/CSPG4/CHST2/CHSY3	17
GO:0001654	GO:0001654	eye development	37/1060	256/12280	0.00126795	0.0146863	0.0114904	SOX8/BAK1/PRDM1/ATP2B4/JMJD6/HIF1A/PPP1R13L/TGFB1/SIPA1L3/PITX3/VEGFA/DLX2/FASLG/TBX2/INHBA/SOX9/DLL4/SCO2/ATP8A2/SKIL/TMOD1/STRA6/BCAR3/BMPR1B/EPHA2/DLX1/BMP6/EPHB1/SHH/RET/CHD7/FSCN2/WNT7B/DIO3/HES5/SMOC1/TENM3	37
GO:0150063	GO:0150063	visual system development	37/1060	256/12280	0.00126795	0.0146863	0.0114904	SOX8/BAK1/PRDM1/ATP2B4/JMJD6/HIF1A/PPP1R13L/TGFB1/SIPA1L3/PITX3/VEGFA/DLX2/FASLG/TBX2/INHBA/SOX9/DLL4/SCO2/ATP8A2/SKIL/TMOD1/STRA6/BCAR3/BMPR1B/EPHA2/DLX1/BMP6/EPHB1/SHH/RET/CHD7/FSCN2/WNT7B/DIO3/HES5/SMOC1/TENM3	37
GO:0002062	GO:0002062	chondrocyte differentiation	18/1060	96/12280	0.00129224	0.0149319	0.0116826	RUNX3/FGFR3/GLI2/PTHLH/TGFB1/SOX9/BMP2/BMPR1B/HMGA2/BMP6/FGF18/NPPC/GREM1/CHST11/CREB3L2/RFLNB/COL27A1/SCX	18
GO:0002761	GO:0002761	regulation of myeloid leukocyte differentiation	16/1060	81/12280	0.00133208	0.0153189	0.0119854	FSTL3/TGFB1/GPR68/INHBA/LIF/PIK3R1/UBASH3B/KLF10/PPARGC1B/RUNX1/DCSTAMP/ESRRA/TRIB1/GATA2/EVI2B/SIGLEC15	16
GO:0032963	GO:0032963	collagen metabolic process	16/1060	81/12280	0.00133208	0.0153189	0.0119854	P3H2/HIF1A/TGFB1/PPARD/ERRFI1/ID1/IL6/MMP3/MMP14/NPPC/ITGA2/MMP10/MMP1/SCX/MMP12/MIR29A	16
GO:0022604	GO:0022604	regulation of cell morphogenesis	53/1060	404/12280	0.00133729	0.0153423	0.0120037	TNFRSF12A/FSTL4/CAMK2B/NGEF/PLXNA2/MAP2/RIMS1/EPB41L3/ICAM1/NRCAM/EZR/CXCL12/CCL7/CAPRIN2/BVES/VEGFA/TTL/CPNE5/ID1/STRIP2/DIAPH1/ENAM/DLG4/NGF/SKIL/SEMA6D/SEMA7A/TPM1/RHOB/MYO10/MSN/DOCK5/GRIP1/FMNL3/ZSWIM5/DRAXIN/PDLIM5/RET/ISLR2/IL1RAPL1/LIMS1/CDH2/HAS2/RIMS2/CSF1R/TACSTD2/OSTN/CDC42SE1/ARC/SMURF1/ATP10A/PALM2/SHANK3	53
GO:0015711	GO:0015711	organic anion transport	41/1060	293/12280	0.00135308	0.0154867	0.0121166	SLC38A5/ABCC2/SLC4A7/SLC4A8/EDN1/SLC1A3/ABCB1/PITPNM3/SLC7A8/SLCO4A1/SLC7A6/KCNN4/APBA1/SLC16A6/FOLR3/PPARD/PLA2G4A/RGS4/SLC19A2/IL1B/ATP8A2/TRPC4/SLC37A2/LRRC8A/STRA6/SLC16A2/PITPNC1/ADORA1/PRKCD/SLC13A4/MFSD2A/LRRC8C/C2CD2L/SLCO2A1/SLC25A22/TNFAIP8L3/IRS2/AKR1C1/SLC6A17/ATP10A/SLC26A6	41
GO:0048880	GO:0048880	sensory system development	37/1060	257/12280	0.00136168	0.0155483	0.0121648	SOX8/BAK1/PRDM1/ATP2B4/JMJD6/HIF1A/PPP1R13L/TGFB1/SIPA1L3/PITX3/VEGFA/DLX2/FASLG/TBX2/INHBA/SOX9/DLL4/SCO2/ATP8A2/SKIL/TMOD1/STRA6/BCAR3/BMPR1B/EPHA2/DLX1/BMP6/EPHB1/SHH/RET/CHD7/FSCN2/WNT7B/DIO3/HES5/SMOC1/TENM3	37
GO:0055025	GO:0055025	positive regulation of cardiac muscle tissue development	10/1060	39/12280	0.00137416	0.0156538	0.0122474	IGF1/EDN1/TGFB1/TBX2/FGF2/MYOCD/NRG1/GREM1/MIR222/MIR17HG	10
GO:0030206	GO:0030206	chondroitin sulfate biosynthetic process	7/1060	21/12280	0.00138046	0.0156886	0.0122746	VCAN/XYLT1/CHST3/CSGALNACT2/CHST11/CSPG4/CHSY3	7
GO:0007204	GO:0007204	positive regulation of cytosolic calcium ion concentration	27/1060	170/12280	0.00139708	0.0157955	0.0123582	BAK1/ATP2B4/EDN1/P2RX5/ITPR3/BDKRB1/TGFB1/GRIN2D/PIK3CG/TACR1/FASLG/PTGFR/MCHR1/DIAPH1/DLG4/FGF2/CASQ1/ABL2/GSTO1/UBASH3B/KISS1/CHD7/GPR4/GATA2/GPR157/TGM2/CD24	27
GO:0032966	GO:0032966	negative regulation of collagen biosynthetic process	5/1060	11/12280	0.00140888	0.0157955	0.0123582	PPARD/ERRFI1/IL6/NPPC/MIR29A	5
GO:0048715	GO:0048715	negative regulation of oligodendrocyte differentiation	5/1060	11/12280	0.00140888	0.0157955	0.0123582	HES1/DLX2/DLX1/ID4/HES5	5
GO:1903587	GO:1903587	regulation of blood vessel endothelial cell proliferation involved in sprouting angiogenesis	5/1060	11/12280	0.00140888	0.0157955	0.0123582	HMOX1/VEGFA/DLL4/GATA2/MIR222	5
GO:0006024	GO:0006024	glycosaminoglycan biosynthetic process	17/1060	89/12280	0.00140949	0.0157955	0.0123582	ST3GAL1/VCAN/PDGFB/XYLT1/TGFB1/CHST3/HS3ST3B1/IL1B/HS3ST3A1/ST3GAL2/CSGALNACT2/B3GNT2/HAS2/CHST11/CSPG4/CHST2/CHSY3	17
GO:0022612	GO:0022612	gland morphogenesis	17/1060	89/12280	0.00140949	0.0157955	0.0123582	TNC/GLI2/TGFB1/AREG/RPS6KA1/TNFAIP3/TBX2/SOX9/TBX3/EPHA2/MSN/SHH/NKX3-1/ID4/CSF1R/PDGFA/TGM2	17
GO:0051346	GO:0051346	negative regulation of hydrolase activity	42/1060	303/12280	0.00143361	0.0160285	0.0125406	PLAUR/BIRC3/PTGS2/PICALM/MAP2/PPP1R15A/GMIP/SERPIND1/TIMP3/CST4/TIMP1/RASA4/TFPI2/SERPINE1/PPIF/BIRC2/ARFGEF3/VEGFA/RPS6KA1/NGF/SPOCD1/SPRY2/SH3RF1/DGKI/F11R/CNST/SPINT1/SERPINB8/ANGPTL4/SERPINA9/CST1/CST6/MYO1D/RPS6KA3/UMODL1/CDC42SE1/SERPINB2/PPP1R14C/PAM16/ELFN1/ANXA8L1/ANXA8	42
GO:0035850	GO:0035850	epithelial cell differentiation involved in kidney development	9/1060	33/12280	0.00147948	0.0164846	0.0128974	PDGFB/LIF/PODXL/MYO1E/GREM1/GDNF/MTSS1/GPR4/CD24	9
GO:0006813	GO:0006813	potassium ion transport	22/1060	129/12280	0.00148122	0.0164846	0.0128974	KCNG1/GAL/SLC1A3/KCNK6/KCNN4/KCNA7/KCNC4/RGS4/WNK4/HCN4/KCNK13/KCNMA1/KCNS2/KCNJ15/LRRC38/KCNF1/ADORA1/NETO1/KCNK9/KCNS3/KCNK3/KCNQ5	22
GO:0030316	GO:0030316	osteoclast differentiation	14/1060	67/12280	0.00148876	0.0165124	0.0129192	FSTL3/TGFB1/GPR68/EPHA2/PIK3R1/UBASH3B/KLF10/PPARGC1B/DCSTAMP/GPR183/JUNB/ESRRA/CSF1R/SIGLEC15	14
GO:0043550	GO:0043550	regulation of lipid kinase activity	11/1060	46/12280	0.00149398	0.0165124	0.0129192	FGFR3/PDGFB/FLT1/TGFB1/SOCS2/FGF2/RUBCN/PIK3R1/TNFAIP8L3/SOCS3/MIR138-1	11
GO:0045685	GO:0045685	regulation of glial cell differentiation	11/1060	46/12280	0.00149398	0.0165124	0.0129192	TGFB1/HES1/DLX2/BMP2/LIF/DLX1/SHH/SPINT1/ID4/CLCF1/HES5	11
GO:0050670	GO:0050670	regulation of lymphocyte proliferation	21/1060	121/12280	0.00149857	0.0165253	0.0129293	IGF1/GAL/NFATC2/TGFB1/HES1/CD274/IL1B/PTPN22/HAVCR2/IL6/SH3RF1/CASP3/SHH/IL12A/GPR183/CLCF1/IRS2/SLC39A10/CARD11/PNP/CD24	21
GO:1905314	GO:1905314	semi-lunar valve development	8/1060	27/12280	0.00150344	0.0165413	0.0129417	TNFRSF1B/ELN/SNAI1/DLL4/SMAD6/STRA6/HEYL/HEY1	8
GO:0072170	GO:0072170	metanephric tubule development	6/1060	16/12280	0.00153133	0.0166872	0.0130559	SOX8/HES1/SOX9/LIF/WNT7B/HES5	6
GO:0072234	GO:0072234	metanephric nephron tubule development	6/1060	16/12280	0.00153133	0.0166872	0.0130559	SOX8/HES1/SOX9/LIF/WNT7B/HES5	6
GO:0090190	GO:0090190	positive regulation of branching involved in ureteric bud morphogenesis	6/1060	16/12280	0.00153133	0.0166872	0.0130559	SOX8/TGFB1/VEGFA/SOX9/GREM1/GDNF	6
GO:0001570	GO:0001570	vasculogenesis	13/1060	60/12280	0.00153398	0.0166872	0.0130559	TIE1/TGFB1/VEGFA/MYOCD/EPHA2/MYO1E/XDH/HEY1/SHH/HAS2/JUNB/GJC1/WNT7B	13
GO:0043407	GO:0043407	negative regulation of MAP kinase activity	13/1060	60/12280	0.00153398	0.0166872	0.0130559	RGS4/DUSP1/DUSP4/IL1B/PTPN22/SPRY2/DUSP5/RGS3/PTPRJ/DUSP2/PRKCD/DUSP7/SPRY4	13
GO:0051145	GO:0051145	smooth muscle cell differentiation	12/1060	53/12280	0.00154106	0.0167266	0.0130867	PDGFB/NFATC2/OLFM2/TGFB1/VEGFA/HES1/EREG/SOX9/MYOCD/HEY1/SHH/MIR221	12
GO:0051924	GO:0051924	regulation of calcium ion transport	26/1060	163/12280	0.00159326	0.0172544	0.0134997	BAK1/CAMK2B/PTGS2/P2RX5/ICAM1/PDGFB/BDKRB1/HOMER2/TGFB1/PIK3CG/TSPAN13/CXCL12/OPRD1/RGS4/MCHR1/DIAPH1/STAC2/CASQ1/GSTO1/UBASH3B/STC1/GEM/RRAD/TRPV3/CHD7/PDE4B	26
GO:0007596	GO:0007596	blood coagulation	33/1060	224/12280	0.00164428	0.0177671	0.0139008	CD9/PLAUR/PRKCH/DGKD/EDN1/P2RX5/ITPR3/SERPIND1/PDGFB/DGKH/TFPI2/PIK3CG/SERPINE1/VWF/SH2B3/ADTRP/PRKCG/IL6/PIK3R1/FERMT3/UBASH3B/DGKI/CSRP1/PRKCD/ITGA2/SHH/THBD/GATA2/PDGFA/SERPINB2/MAFK/ITGB3/ANXA8	33
GO:0048762	GO:0048762	mesenchymal cell differentiation	27/1060	172/12280	0.00166569	0.0179284	0.014027	SOX8/EDN1/HIF1A/SMAD7/TGFB1/HES1/SNAI1/SOX9/IL1B/BMP2/SEMA6D/SEMA7A/HMGA2/NRG1/MSX1/KBTBD8/HEYL/HEY1/SHH/RET/GREM1/GBX2/GDNF/HAS2/RFLNB/MIR222/MIR221	27
GO:0032944	GO:0032944	regulation of mononuclear cell proliferation	21/1060	122/12280	0.00166663	0.0179284	0.014027	IGF1/GAL/NFATC2/TGFB1/HES1/CD274/IL1B/PTPN22/HAVCR2/IL6/SH3RF1/CASP3/SHH/IL12A/GPR183/CLCF1/IRS2/SLC39A10/CARD11/PNP/CD24	21
GO:0015698	GO:0015698	inorganic anion transport	19/1060	106/12280	0.00167399	0.0179675	0.0140576	ABCC2/SLC4A7/SLC4A8/SLC1A3/ABCB1/WNK4/BEST3/SLC37A2/LRRC8A/PRKG2/BEST4/SLC20A1/ANO7/ANKH/SLC13A4/CLIC3/LRRC8C/CLDN4/SLC26A6	19
GO:0071902	GO:0071902	positive regulation of protein serine/threonine kinase activity	37/1060	260/12280	0.00168012	0.0179933	0.0140778	IGF1/MAP2K3/ATP2B4/EDN1/NOX4/GADD45B/PDGFB/FLT1/TGFB1/PIK3CG/DKK1/VEGFA/FGF1/IL1B/BMP2/GADD45G/IRAK2/NGF/SPRY2/DUSP5/FGF2/FGF18/NRG1/TGFA/ADORA1/NEK10/DUSP7/RET/MLKL/ADRB2/CSPG4/FZD8/ERN1/CSF1R/WNT7B/PDGFA/CD24	37
GO:0045453	GO:0045453	bone resorption	10/1060	40/12280	0.00169283	0.0180494	0.0141217	NOX4/TNFAIP3/IL6/UBASH3B/PPARGC1B/DCSTAMP/ADRB2/CSF1R/SIGLEC15/ITGB3	10
GO:0051155	GO:0051155	positive regulation of striated muscle cell differentiation	10/1060	40/12280	0.00169283	0.0180494	0.0141217	IGF1/IL4R/EDN1/NFATC2/TGFB1/MYOCD/NRG1/MMP14/SHH/GREM1	10
GO:0043409	GO:0043409	negative regulation of MAPK cascade	23/1060	139/12280	0.00177066	0.0188376	0.0147384	RPS6KA6/EZR/TIMP3/ERRFI1/RGS4/DUSP1/DUSP4/IL1B/LIF/PTPN22/SPRY2/DUSP5/RGS3/PTPRJ/PTPRR/DUSP2/PRKCD/DUSP7/DACT1/C1QL4/SPRY4/MIR221/MIR138-1	23
GO:0051051	GO:0051051	negative regulation of transport	44/1060	325/12280	0.00179685	0.0190083	0.0148719	TNFRSF1B/GPM6B/PTGS2/PICALM/EDN1/ICAM1/EZR/IL11/HMOX1/FERMT1/TGFB1/PPIF/ADTRP/RGS4/TNFAIP3/INHBA/IL13RA2/IL1B/WNK4/RAP1B/BEST3/LIF/DLG4/PTPN22/IL33/PRKG2/RUBCN/GSTO1/NRG1/STC1/NLRP3/ADORA1/FABP5/SHH/GEM/RRAD/IL1RAPL1/PKIA/MCTP1/IRS2/OSTN/YRDC/MIR103A2/ITGB3	44
GO:0030512	GO:0030512	negative regulation of transforming growth factor beta receptor signaling pathway	13/1060	61/12280	0.00179851	0.0190083	0.0148719	SMAD7/TGFB1/SNX25/PMEPA1/SKIL/SMAD6/PRDM16/HTRA3/CHST11/NRROS/ADAMTSL2/SMURF1/MIR17HG	13
GO:0071621	GO:0071621	granulocyte chemotaxis	13/1060	61/12280	0.00179851	0.0190083	0.0148719	EDN1/CXCL2/PIK3CG/CCL7/CCL20/CXCL6/IL1B/ITGA9/CXADR/CXCL3/CXCL5/CXCL8/PDE4B	13
GO:0048872	GO:0048872	homeostasis of number of cells	30/1060	199/12280	0.00182499	0.0192461	0.0150579	BAK1/JMJD6/HMOX1/HIF1A/ERCC2/TGFB1/VEGFA/TNFAIP3/INHBA/CXCL6/SOX9/KLF2/AMPD3/ETS1/DOCK10/IL6/SKIL/LYAR/TSC22D3/CASP3/GPR183/KLF13/CDH2/BPGM/GATA2/PDE4B/CARD11/MIR222/MIR221/MIR17HG	30
GO:0003401	GO:0003401	axis elongation	7/1060	22/12280	0.00187553	0.0196931	0.0154077	TNC/TGFB1/AREG/FGF1/SOX9/SPRY2/SHH	7
GO:0061311	GO:0061311	cell surface receptor signaling pathway involved in heart development	7/1060	22/12280	0.00187553	0.0196931	0.0154077	TGFB1/DKK1/SNAI1/BMP2/DLL4/MSX1/HEY1	7
GO:0050920	GO:0050920	regulation of chemotaxis	24/1060	148/12280	0.00188618	0.0197619	0.0154615	EDN1/ANGPT2/PDGFB/TGFB1/SERPINE1/CXCL12/CCL7/VEGFA/FGF1/PGF/DUSP1/IL6/SEMA6D/SEMA7A/FGF2/VEGFC/FGF18/ZSWIM5/ITGA2/STX3/GREM1/IL12A/CXCL8/GPR183	24
GO:0006836	GO:0006836	neurotransmitter transport	26/1060	165/12280	0.00190291	0.0198618	0.0155397	SYN1/SYT7/SLC38A5/GPM6B/EDN1/SLC1A3/RIMS1/STX1A/APBA1/KCNC4/RGS4/PRKCG/RAP1B/TRPC4/DGKI/CSF2/STX3/GDNF/RAB3B/SYT12/MCTP1/RIMS2/SLC25A22/SYN3/SLC6A17/DOC2B	26
GO:0007600	GO:0007600	sensory perception	39/1060	280/12280	0.00190631	0.0198618	0.0155397	USH2A/PTGS2/MGLL/EDN1/SLC1A3/RIMS1/IMPG2/ICAM1/ITPR3/TIMP3/BDKRB1/CST4/HOMER2/OLFM2/GRIN2D/CXCL12/ASIC2/OPRD1/PDC/DLL4/DIAPH1/ATP8A2/SPRY2/EPHB1/ATP2B2/CNNM4/ADORA1/ITGA2/CASP3/FABP5/GJB2/DRGX/NAV2/B3GNT2/CST1/CHD7/GJC1/TACSTD2/FSCN2	39
GO:0050817	GO:0050817	coagulation	33/1060	226/12280	0.00190805	0.0198618	0.0155397	CD9/PLAUR/PRKCH/DGKD/EDN1/P2RX5/ITPR3/SERPIND1/PDGFB/DGKH/TFPI2/PIK3CG/SERPINE1/VWF/SH2B3/ADTRP/PRKCG/IL6/PIK3R1/FERMT3/UBASH3B/DGKI/CSRP1/PRKCD/ITGA2/SHH/THBD/GATA2/PDGFA/SERPINB2/MAFK/ITGB3/ANXA8	33
GO:0009914	GO:0009914	hormone transport	30/1060	200/12280	0.00197486	0.0204973	0.0160369	SYT7/GAL/EDN1/IL11/ITPR3/HIF1A/SLCO4A1/STX1A/PPARD/GPR68/INHBA/IL1B/LIF/VGF/ARNTL/TBX3/IL6/REN/SLC16A2/BMP6/ADORA1/NKX3-1/KISS1/KCNS3/CHD7/C2CD2L/RIMS2/IRS2/FOXD1/DOC2B	30
GO:0002793	GO:0002793	positive regulation of peptide secretion	27/1060	174/12280	0.00197759	0.0204973	0.0160369	IGF1/IL4R/EZR/HIF1A/FERMT1/KCNN4/TGFB1/PPARD/IL1RL1/GPR68/CD274/PTPN22/HAVCR2/IL6/IL33/ANKRD1/VEGFC/BMP6/HK1/NLRP3/ADORA1/KISS1/C2CD2L/CSF1R/IRS2/MMP12/DOC2B	27
GO:2000027	GO:2000027	regulation of animal organ morphogenesis	25/1060	157/12280	0.00198791	0.0205602	0.0160861	SOX8/EDN1/TGFB1/DKK1/VEGFA/FGF1/HES1/TNFAIP3/TBX2/SOX9/BMP2/LIF/ENAM/RSPO3/MSX1/SHH/DACT1/GREM1/GDNF/ODAPH/TACSTD2/SP6/DIO3/PDGFA/SMURF1	25
GO:0006023	GO:0006023	aminoglycan biosynthetic process	17/1060	92/12280	0.00205093	0.0211666	0.0165606	ST3GAL1/VCAN/PDGFB/XYLT1/TGFB1/CHST3/HS3ST3B1/IL1B/HS3ST3A1/ST3GAL2/CSGALNACT2/B3GNT2/HAS2/CHST11/CSPG4/CHST2/CHSY3	17
GO:0061098	GO:0061098	positive regulation of protein tyrosine kinase activity	10/1060	41/12280	0.00206875	0.0212654	0.0166378	NOX4/PDGFB/EREG/DLG4/NRG1/TGFA/ADORA1/GREM1/CSF1R/CD24	10
GO:0071241	GO:0071241	cellular response to inorganic substance	24/1060	149/12280	0.0020693	0.0212654	0.0166378	SYT7/FSTL3/PTGS2/EDN1/HMOX1/RASA4/MAPK8/PPIF/CPNE5/MT2A/FOSB/DLG4/ALOX5AP/ADCY10/MMP3/BMP6/SHH/MT1E/JUNB/KCNK3/SYT12/SCN5A/MT1X/SYT15	24
GO:0031960	GO:0031960	response to corticosteroid	20/1060	116/12280	0.00208227	0.0213531	0.0167065	PTGS2/EDN1/ICAM1/TGFB1/AREG/NR3C1/ERRFI1/DUSP1/FOSB/IL6/EIF4E/BMP6/PPARGC1B/STC1/CASP3/GJB2/NPAS4/FOSL1/WNT7B/NPAS4	20
GO:0033135	GO:0033135	regulation of peptidyl-serine phosphorylation	18/1060	100/12280	0.00208668	0.0213531	0.0167065	BAK1/ATP2B4/PTGS2/IL11/SMAD7/TGFB1/DKK1/CSF3/CAPRIN2/VEGFA/OPRD1/LIF/SPRY2/IL6/BCAR3/PLCL2/RET/IFNE	18
GO:1903725	GO:1903725	regulation of phospholipid metabolic process	13/1060	62/12280	0.00209961	0.02144	0.0167745	FGFR3/PDGFB/FLT1/TGFB1/SOCS2/FGF2/RUBCN/PIK3R1/PRKCD/TNFAIP8L3/SOCS3/PDGFA/MIR138-1	13
GO:0034103	GO:0034103	regulation of tissue remodeling	11/1060	48/12280	0.00215778	0.0218623	0.0171048	SYT7/TGFB1/TNFAIP3/IL6/UBASH3B/PPARGC1B/DCSTAMP/GREM1/CSF1R/SIGLEC15/ITGB3	11
GO:0035924	GO:0035924	cellular response to vascular endothelial growth factor stimulus	11/1060	48/12280	0.00215778	0.0218623	0.0171048	MAP2K3/FLT1/VEGFA/PGF/NR4A1/DLL4/SPRY2/VEGFC/XDH/ERN1/EGR3	11
GO:0043367	GO:0043367	CD4-positive, alpha-beta T cell differentiation	11/1060	48/12280	0.00215778	0.0218623	0.0171048	RUNX3/CBFB/IL4R/SMAD7/CD83/IL6/NFKBIZ/SH3RF1/RUNX1/NLRP3/GPR183	11
GO:0021675	GO:0021675	nerve development	12/1060	55/12280	0.00215907	0.0218623	0.0171048	SLC1A3/HES1/ITGA4/PRKCG/NGF/EPHB1/DRGX/RET/NAV2/CHD7/FBXO45/COL25A1	12
GO:0006875	GO:0006875	cellular metal ion homeostasis	46/1060	347/12280	0.00219458	0.0219992	0.017212	BAK1/ATP2B4/EDN1/P2RX5/ITPR3/HMOX1/HIF1A/BDKRB1/TGFB1/GRIN2D/PIK3CG/CXCL12/CCL7/SLC30A3/TACR1/FASLG/PTGFR/MT2A/MCHR1/SCO2/DIAPH1/DLG4/TRPC4/ATP13A3/FGF2/CASQ1/ABL2/GSTO1/BMP6/UBASH3B/KCNMA1/ATP2B2/STC1/ADORA1/MT1E/KISS1/KCNK3/CHD7/CALB2/GPR4/GATA2/GPR157/MT1X/SLC39A10/TGM2/CD24	46
GO:0002825	GO:0002825	regulation of T-helper 1 type immune response	6/1060	17/12280	0.00219537	0.0219992	0.017212	IL4R/IL27RA/IL1RL1/IL1B/HAVCR2/IL33	6
GO:0061756	GO:0061756	leukocyte adhesion to vascular endothelial cell	6/1060	17/12280	0.00219537	0.0219992	0.017212	ICAM1/CXCL12/ITGA4/ETS1/MIR222/MIR221	6
GO:0072207	GO:0072207	metanephric epithelium development	6/1060	17/12280	0.00219537	0.0219992	0.017212	SOX8/HES1/SOX9/LIF/WNT7B/HES5	6
GO:0072243	GO:0072243	metanephric nephron epithelium development	6/1060	17/12280	0.00219537	0.0219992	0.017212	SOX8/HES1/SOX9/LIF/WNT7B/HES5	6
GO:0007599	GO:0007599	hemostasis	33/1060	228/12280	0.0022076	0.022076	0.0172721	CD9/PLAUR/PRKCH/DGKD/EDN1/P2RX5/ITPR3/SERPIND1/PDGFB/DGKH/TFPI2/PIK3CG/SERPINE1/VWF/SH2B3/ADTRP/PRKCG/IL6/PIK3R1/FERMT3/UBASH3B/DGKI/CSRP1/PRKCD/ITGA2/SHH/THBD/GATA2/PDGFA/SERPINB2/MAFK/ITGB3/ANXA8	33
GO:0010713	GO:0010713	negative regulation of collagen metabolic process	5/1060	12/12280	0.00224454	0.0222611	0.0174169	PPARD/ERRFI1/IL6/NPPC/MIR29A	5
GO:0035988	GO:0035988	chondrocyte proliferation	5/1060	12/12280	0.00224454	0.0222611	0.0174169	FGFR3/BMPR1B/HMGA2/MMP14/STC1	5
GO:0050930	GO:0050930	induction of positive chemotaxis	5/1060	12/12280	0.00224454	0.0222611	0.0174169	CXCL12/VEGFA/PGF/VEGFC/CXCL8	5
GO:2001185	GO:2001185	regulation of CD8-positive, alpha-beta T cell activation	5/1060	12/12280	0.00224454	0.0222611	0.0174169	RUNX3/CBFB/CD274/SH3RF1/RUNX1	5
GO:0016525	GO:0016525	negative regulation of angiogenesis	16/1060	85/12280	0.00225167	0.022286	0.0174364	TIE1/ANGPT2/SERPINE1/FASLG/KLF2/DLL4/SPRY2/EPHA2/MINAR1/MMRN2/GPR4/MIR377/MIR222/MIR221/MIR138-1/MIR29A	16
GO:0055065	GO:0055065	metal ion homeostasis	51/1060	395/12280	0.00229898	0.0227077	0.0177663	BAK1/ATP2B4/PICALM/EDN1/P2RX5/SLC7A8/ITPR3/HMOX1/HIF1A/BDKRB1/TGFB1/GRIN2D/PIK3CG/CXCL12/CCL7/CYP27B1/SLC30A3/TACR1/FASLG/PTGFR/MT2A/MCHR1/SCO2/DIAPH1/DLG4/TRPC4/ATP13A3/FGF2/CASQ1/ABL2/GSTO1/BMP6/UBASH3B/KCNMA1/ATP2B2/CNNM4/STC1/ADORA1/STEAP1/MT1E/KISS1/KCNK3/CHD7/CALB2/GPR4/GATA2/GPR157/MT1X/SLC39A10/TGM2/CD24	51
GO:0033673	GO:0033673	negative regulation of kinase activity	30/1060	202/12280	0.00230658	0.0227363	0.0177887	GCKR/GADD45B/CBLB/ERRFI1/RGS4/TNFAIP3/DUSP1/DUSP4/IL1B/PTPN22/SPRY2/DUSP5/RGS3/MYOCD/RUBCN/PTPRJ/UBASH3B/DUSP2/PRKCD/DUSP7/CASP3/PKIA/TRIB1/SH3BP5L/SOCS3/IRS2/SPRY4/IPO7/MIR138-1/DBNDD2	30
GO:0070482	GO:0070482	response to oxygen levels	39/1060	283/12280	0.00231468	0.0227696	0.0178148	PTGS2/EDN1/NOX4/ICAM1/ANGPT2/HMOX1/HIF1A/ERCC2/TGFB1/CXCL12/BIRC2/PPARD/VEGFA/CPEB4/OPRD1/PGF/BMP2/ETS1/MYOCD/ANKRD1/MMP3/VEGFC/KCNMA1/MMP14/STC1/HK2/NPPC/ADORA1/ITGA2/CASP3/CLDN3/MMP10/NKX3-1/ANGPTL4/KCNK3/PLK3/PLEKHN1/MMP12/CD24	39
GO:0030879	GO:0030879	mammary gland development	19/1060	109/12280	0.00233775	0.0229199	0.0179323	GLI2/HIF1A/TGFB1/AREG/VEGFA/PRLR/SOCS2/TBX2/SOX9/TBX3/EPHA2/NRG1/XDH/HK2/MSX1/ITGA2/CSF1R/IRS2/WNT7B	19
GO:0007173	GO:0007173	epidermal growth factor receptor signaling pathway	18/1060	101/12280	0.00233944	0.0229199	0.0179323	PLAUR/DGKD/TGFB1/AREG/HBEGF/CBLB/ERRFI1/FASLG/EREG/SOX9/PTPN12/SPRY2/PIK3R1/FAM83A/SHC3/PTPRJ/TGFA/ADORA1	18
GO:2001236	GO:2001236	regulation of extrinsic apoptotic signaling pathway	22/1060	134/12280	0.00243771	0.0238017	0.0186222	TNFRSF12A/IGF1/ICAM1/ITGA6/TIMP3/HMOX1/TNFRSF10A/SERPINE1/FASLG/TNFAIP3/INHBA/G0S2/IL1B/SKIL/BMPR1B/MCL1/SH3RF1/CSF2/RET/GDNF/MIR222/MIR221	22
GO:0045445	GO:0045445	myoblast differentiation	13/1060	63/12280	0.00244098	0.0238017	0.0186222	SOX8/IGF1/TGFB1/PPARD/ID3/TBX2/SOX9/TBX3/MYOCD/ANKRD1/NRG1/SHH/GREM1	13
GO:0050728	GO:0050728	negative regulation of inflammatory response	15/1060	78/12280	0.00245409	0.0238017	0.0186222	TNFRSF1B/PPARD/TNFAIP3/TNFAIP6/ETS1/NT5E/NLRP3/ADORA1/PRKCD/METRNL/C5orf30/SOCS3/FAM19A3/MIR222/MIR221	15
GO:0060078	GO:0060078	regulation of postsynaptic membrane potential	15/1060	78/12280	0.00245409	0.0238017	0.0186222	RIMS1/P2RX5/GRIN2D/STX1A/RGS4/DLG4/DGKI/ADORA1/NETO1/ADRB2/NPAS4/RIMS2/INSYN2/SHANK3/NPAS4	15
GO:1903038	GO:1903038	negative regulation of leukocyte cell-cell adhesion	15/1060	78/12280	0.00245409	0.0238017	0.0186222	RUNX3/CBFB/IL4R/SMAD7/TGFB1/CXCL12/ADTRP/CD274/PTPN22/HAVCR2/RUNX1/CASP3/SHH/MIR222/MIR221	15
GO:0098742	GO:0098742	cell-cell adhesion via plasma-membrane adhesion molecules	26/1060	168/12280	0.0024634	0.0238441	0.0186554	ICAM1/CDH6/PCDH12/BMP2/LRRC4/MYPN/PCDH10/AMIGO2/NECTIN4/ESAM/CXADR/PCDH1/CLDN12/CLDN14/ITGA5/NTNG1/CLDN3/LRFN5/RET/IL1RAPL1/CDH2/LRFN4/CLDN4/MIR221/TENM3/PCDHGC5	26
GO:0014003	GO:0014003	oligodendrocyte development	8/1060	29/12280	0.00248932	0.0238897	0.0186911	CD9/HDAC10/ERCC2/TGFB1/SHH/ID4/HES5/ZNF488	8
GO:1904707	GO:1904707	positive regulation of vascular smooth muscle cell proliferation	8/1060	29/12280	0.00248932	0.0238897	0.0186911	IGF1/EDN1/PDGFB/NR4A3/FGF2/ERN1/MIR222/MIR221	8
GO:1905332	GO:1905332	positive regulation of morphogenesis of an epithelium	8/1060	29/12280	0.00248932	0.0238897	0.0186911	SOX8/TGFB1/VEGFA/SOX9/LIF/GREM1/GDNF/MIR221	8
GO:2000273	GO:2000273	positive regulation of signaling receptor activity	8/1060	29/12280	0.00248932	0.0238897	0.0186911	CACNG4/EREG/TGFA/ADORA1/GREM1/ADRB2/ARC/SHANK3	8
GO:0000188	GO:0000188	inactivation of MAPK activity	7/1060	23/12280	0.00249778	0.0238897	0.0186911	RGS4/DUSP1/DUSP4/DUSP5/RGS3/DUSP2/DUSP7	7
GO:0035767	GO:0035767	endothelial cell chemotaxis	7/1060	23/12280	0.00249778	0.0238897	0.0186911	VEGFA/FGF1/NR4A1/FGF2/FGF18/PLEKHG5/EGR3	7
GO:0038127	GO:0038127	ERBB signaling pathway	20/1060	118/12280	0.00256509	0.0244849	0.0191568	PLAUR/DGKD/TGFB1/AREG/HBEGF/CBLB/ERRFI1/FASLG/EREG/SOX9/PTPN12/SPRY2/PIK3R1/FAM83A/SHC3/PTPRJ/PTPRR/NRG1/TGFA/ADORA1	20
GO:0045667	GO:0045667	regulation of osteoblast differentiation	17/1060	94/12280	0.00260194	0.0247877	0.0193937	IGF1/AREG/ID3/BMP2/ID1/IL6/SMAD6/BMPR1B/BMP6/NPPC/GREM1/ID4/ESRRA/WNT7B/OSTN/SMOC1/MIR138-1	17
GO:0001816	GO:0001816	cytokine production	60/1060	484/12280	0.00260975	0.0248132	0.0194136	BIRC3/MAP2K3/NAV3/PTGS2/IL4R/EZR/HMOX1/HIF1A/NFATC2/FERMT1/SMAD7/HOMER2/IL27RA/TGFB1/PIK3CG/SERPINE1/BIRC2/CD83/ITGB6/IL1RL2/IL1RL1/ERRFI1/TNFAIP3/NR4A3/CD274/INHBA/LRRFIP1/CXCL6/EREG/IL1B/KLF2/RNF128/PTPN22/HAVCR2/IL6/IL33/SEMA7A/EPHA2/PIK3R1/PTPRJ/HK1/MAPK13/F11R/RUNX1/NLRP3/PRKCD/CSF2/DDX21/IL12A/NRROS/SPHK1/C5orf30/CSF1R/PDE4B/CARD11/PNP/MIR222/MIR221/MMP12/CD24	60
GO:0008217	GO:0008217	regulation of blood pressure	18/1060	102/12280	0.00261736	0.0248367	0.019432	PTGS2/EDN1/PTGS1/KCNK6/HMOX1/PDGFB/BDKRB1/NCALD/ASIC2/SGK1/TPM1/REN/PLCB3/VEGFC/F11R/ADORA1/NAV2/ADRB2	18
GO:0014031	GO:0014031	mesenchymal cell development	14/1060	71/12280	0.00264985	0.0250465	0.0195962	SOX8/EDN1/HIF1A/HES1/SOX9/SEMA6D/SEMA7A/NRG1/KBTBD8/HEYL/SHH/RET/GBX2/GDNF	14
GO:0033138	GO:0033138	positive regulation of peptidyl-serine phosphorylation	14/1060	71/12280	0.00264985	0.0250465	0.0195962	ATP2B4/PTGS2/IL11/TGFB1/CSF3/CAPRIN2/VEGFA/OPRD1/LIF/SPRY2/IL6/BCAR3/RET/IFNE	14
GO:0001776	GO:0001776	leukocyte homeostasis	13/1060	64/12280	0.00282653	0.0266643	0.0208619	BAK1/HIF1A/TGFB1/TNFAIP3/CXCL6/DOCK10/IL6/SKIL/TSC22D3/CASP3/GPR183/PDE4B/MIR17HG	13
GO:0002763	GO:0002763	positive regulation of myeloid leukocyte differentiation	9/1060	36/12280	0.0028553	0.0267788	0.0209515	TGFB1/GPR68/LIF/KLF10/PPARGC1B/RUNX1/DCSTAMP/TRIB1/EVI2B	9
GO:0003229	GO:0003229	ventricular cardiac muscle tissue development	9/1060	36/12280	0.0028553	0.0267788	0.0209515	DSP/SMAD7/PPP1R13L/TGFB1/DLL4/TBX3/TPM1/NRG1/CHD7	9
GO:0036092	GO:0036092	phosphatidylinositol-3-phosphate biosynthetic process	9/1060	36/12280	0.0028553	0.0267788	0.0209515	FGFR3/SYNJ2/PIK3CG/FGF1/FGF5/FGF2/PIK3R1/FGF18/IRS2	9
GO:0055074	GO:0055074	calcium ion homeostasis	37/1060	268/12280	0.002864	0.0268083	0.0209746	BAK1/ATP2B4/EDN1/P2RX5/ITPR3/BDKRB1/TGFB1/GRIN2D/PIK3CG/CXCL12/CCL7/CYP27B1/TACR1/FASLG/PTGFR/MCHR1/DIAPH1/DLG4/TRPC4/ATP13A3/FGF2/CASQ1/ABL2/GSTO1/UBASH3B/ATP2B2/STC1/ADORA1/KISS1/KCNK3/CHD7/CALB2/GPR4/GATA2/GPR157/TGM2/CD24	37
GO:0010721	GO:0010721	negative regulation of cell development	35/1060	250/12280	0.00291036	0.0271896	0.0212729	SOX8/IGF1/FSTL4/NGEF/GAL/CRMP1/MAP2/PTHLH/TGFB1/PITX3/HES1/DLX2/RGS4/ID3/SOX9/IL1B/ID1/RAP1GAP2/IL6/SEMA6D/SEMA7A/DLX1/EIF4E/NRG1/DRAXIN/NPPC/SHH/MINAR1/ID4/GAK/RFLNB/TACSTD2/OSTN/DIO3/HES5	35
GO:0045844	GO:0045844	positive regulation of striated muscle tissue development	12/1060	57/12280	0.00296607	0.0275502	0.021555	IGF1/EDN1/TGFB1/TBX2/ARNTL/FGF2/MYOCD/NRG1/SHH/GREM1/MIR222/MIR17HG	12
GO:0048636	GO:0048636	positive regulation of muscle organ development	12/1060	57/12280	0.00296607	0.0275502	0.021555	IGF1/EDN1/TGFB1/TBX2/ARNTL/FGF2/MYOCD/NRG1/SHH/GREM1/MIR222/MIR17HG	12
GO:0070373	GO:0070373	negative regulation of ERK1 and ERK2 cascade	12/1060	57/12280	0.00296607	0.0275502	0.021555	RPS6KA6/EZR/TIMP3/ERRFI1/DUSP1/DUSP4/LIF/SPRY2/PTPRR/C1QL4/SPRY4/MIR221	12
GO:0045843	GO:0045843	negative regulation of striated muscle tissue development	10/1060	43/12280	0.00302139	0.0275828	0.0215805	JARID2/TGFB1/DKK1/RGS4/BMP2/MYOCD/CXADR/EPHB1/MIR222/MIR17HG	10
GO:0060135	GO:0060135	maternal process involved in female pregnancy	10/1060	43/12280	0.00302139	0.0275828	0.0215805	PRDM1/PTGS2/ANGPT2/CYP27B1/PPARD/LIF/HAVCR2/STC1/GJB2/JUNB	10
GO:0072091	GO:0072091	regulation of stem cell proliferation	10/1060	43/12280	0.00302139	0.0275828	0.0215805	HIF1A/FERMT1/TGFB1/VEGFA/TBX3/HMGA2/VEGFC/SHH/MIR222/MIR221	10
GO:1905207	GO:1905207	regulation of cardiocyte differentiation	10/1060	43/12280	0.00302139	0.0275828	0.0215805	IGF1/EDN1/TGFB1/DKK1/RGS4/BMP2/MYOCD/NRG1/GREM1/MIR222	10
GO:0060840	GO:0060840	artery development	14/1060	72/12280	0.00303429	0.0275828	0.0215805	ADAMTS6/PRDM1/SMAD7/VEGFA/HES1/TBX2/DLL4/SMAD6/STRA6/MYOCD/HEY1/SHH/NKX3-1/CHD7	14
GO:0048639	GO:0048639	positive regulation of developmental growth	21/1060	128/12280	0.00304885	0.0275828	0.0215805	TNFRSF12A/IGF1/EDN1/RIMS1/EZR/CXCL12/PPARD/VEGFA/TBX2/CPNE5/ATP8A2/NGF/SEMA7A/FGF2/ISLR2/CHD7/RIMS2/DIO3/SMURF1/MIR222/MIR17HG	21
GO:0051147	GO:0051147	regulation of muscle cell differentiation	21/1060	128/12280	0.00304885	0.0275828	0.0215805	IGF1/IL4R/EDN1/PDGFB/NFATC2/OLFM2/TGFB1/DKK1/RGS4/EREG/BMP2/MYOCD/NRG1/MMP14/MSX1/SHH/GREM1/CDH2/BHLHA15/MIR222/MIR221	21
GO:0002043	GO:0002043	blood vessel endothelial cell proliferation involved in sprouting angiogenesis	6/1060	18/12280	0.00305524	0.0275828	0.0215805	HMOX1/VEGFA/DLL4/EPHA2/GATA2/MIR222	6
GO:0045662	GO:0045662	negative regulation of myoblast differentiation	6/1060	18/12280	0.00305524	0.0275828	0.0215805	SOX8/TGFB1/PPARD/ID3/SOX9/TBX3	6
GO:0060055	GO:0060055	angiogenesis involved in wound healing	6/1060	18/12280	0.00305524	0.0275828	0.0215805	SERPINE1/TNFAIP3/ETS1/FOXC2/GPR4/ITGB3	6
GO:0060512	GO:0060512	prostate gland morphogenesis	6/1060	18/12280	0.00305524	0.0275828	0.0215805	TNC/GLI2/SOX9/SHH/NKX3-1/ID4	6
GO:0060740	GO:0060740	prostate gland epithelium morphogenesis	6/1060	18/12280	0.00305524	0.0275828	0.0215805	TNC/GLI2/SOX9/SHH/NKX3-1/ID4	6
GO:0061213	GO:0061213	positive regulation of mesonephros development	6/1060	18/12280	0.00305524	0.0275828	0.0215805	SOX8/TGFB1/VEGFA/SOX9/GREM1/GDNF	6
GO:0071243	GO:0071243	cellular response to arsenic-containing substance	6/1060	18/12280	0.00305524	0.0275828	0.0215805	GSTO2/HMOX1/PPIF/GSTO1/MAPK13/ZFAND2A	6
GO:2000727	GO:2000727	positive regulation of cardiac muscle cell differentiation	6/1060	18/12280	0.00305524	0.0275828	0.0215805	IGF1/EDN1/TGFB1/MYOCD/NRG1/GREM1	6
GO:0001817	GO:0001817	regulation of cytokine production	55/1060	439/12280	0.00307683	0.0277259	0.0216925	BIRC3/MAP2K3/NAV3/PTGS2/IL4R/EZR/HMOX1/HIF1A/FERMT1/SMAD7/HOMER2/IL27RA/TGFB1/SERPINE1/BIRC2/CD83/ITGB6/IL1RL2/IL1RL1/ERRFI1/TNFAIP3/NR4A3/CD274/INHBA/LRRFIP1/CXCL6/EREG/IL1B/KLF2/RNF128/PTPN22/HAVCR2/IL6/IL33/SEMA7A/EPHA2/PIK3R1/PTPRJ/HK1/MAPK13/F11R/RUNX1/NLRP3/CSF2/DDX21/IL12A/SPHK1/C5orf30/CSF1R/PDE4B/CARD11/MIR222/MIR221/MMP12/CD24	55
GO:0098815	GO:0098815	modulation of excitatory postsynaptic potential	8/1060	30/12280	0.0031419	0.0282595	0.02211	RIMS1/STX1A/RGS4/DLG4/NETO1/ADRB2/RIMS2/SHANK3	8
GO:0071260	GO:0071260	cellular response to mechanical stimulus	13/1060	65/12280	0.00326039	0.0292575	0.0228908	BAK1/PTGS2/TNFRSF10A/TGFB1/MAPK8/SOX9/IL1B/HABP4/ANKRD1/BMP6/ITGA2/CRADD/SCX	13
GO:0050650	GO:0050650	chondroitin sulfate proteoglycan biosynthetic process	7/1060	24/12280	0.00326732	0.0292575	0.0228908	VCAN/XYLT1/CHST3/CSGALNACT2/CHST11/CSPG4/CHSY3	7
GO:2000241	GO:2000241	regulation of reproductive process	17/1060	96/12280	0.00327102	0.0292575	0.0228908	IGF1/TIMP1/ARHGDIB/DUSP1/INHBA/AGO2/SNAI1/SOX9/LIF/MSX1/NPPC/SHH/NKX3-1/PDE3A/UMODL1/MEIOC/GPR3	17
GO:0050714	GO:0050714	positive regulation of protein secretion	25/1060	163/12280	0.00333681	0.0297908	0.023308	IGF1/IL4R/EZR/HIF1A/FERMT1/KCNN4/TGFB1/PPARD/IL1RL1/GPR68/CD274/PTPN22/HAVCR2/IL6/IL33/ANKRD1/VEGFC/BMP6/HK1/NLRP3/C2CD2L/CSF1R/IRS2/MMP12/DOC2B	25
GO:0006596	GO:0006596	polyamine biosynthetic process	5/1060	13/12280	0.00339024	0.0299906	0.0234644	SMOX/ODC1/AGMAT/AMD1/SAT1	5
GO:0016338	GO:0016338	calcium-independent cell-cell adhesion via plasma membrane cell-adhesion molecules	5/1060	13/12280	0.00339024	0.0299906	0.0234644	BMP2/CLDN12/CLDN14/CLDN3/CLDN4	5
GO:0035929	GO:0035929	steroid hormone secretion	5/1060	13/12280	0.00339024	0.0299906	0.0234644	GAL/INHBA/REN/BMP6/NKX3-1	5
GO:0050996	GO:0050996	positive regulation of lipid catabolic process	5/1060	13/12280	0.00339024	0.0299906	0.0234644	ABHD5/IL1B/ADORA1/PRKCD/IRS2	5
GO:0072079	GO:0072079	nephron tubule formation	5/1060	13/12280	0.00339024	0.0299906	0.0234644	SOX8/SOX9/GREM1/GDNF/HES5	5
GO:0090596	GO:0090596	sensory organ morphogenesis	26/1060	172/12280	0.00342458	0.0302389	0.0236587	SOX8/BAK1/PRDM1/GLI2/EDN1/HIF1A/PITX3/VEGFA/FASLG/NR4A3/TBX2/SOX9/ATP8A2/SPRY2/STRA6/BCAR3/EPHA2/EPHB1/MSX1/GBX2/CHD7/TCAP/GATA2/FSCN2/DIO3/TENM3	26
GO:0098662	GO:0098662	inorganic cation transmembrane transport	60/1060	490/12280	0.00345172	0.0303757	0.0237657	KCNG1/ATP2B4/GAL/PICALM/CACNG4/SLC1A3/ITPR3/KCNK6/BDKRB1/KCNN4/KCNA7/TGFB1/GRIN2D/PIK3CG/TSPAN13/PPIF/ASIC2/SLC30A3/KCNC4/RGS4/FASLG/WNK4/DIAPH1/TRPC4/SLC41A2/HCN4/FGF2/STAC2/CASQ1/SLC20A1/GSTO1/KCNK13/UBASH3B/KCNMA1/KCNS2/ATP2B2/KCNJ15/CNNM4/PKD1L1/CACHD1/LRRC38/KCNF1/NIPAL1/GEM/NETO1/RRAD/C15orf48/TRPV3/IL1RAPL1/KCNK9/KCNS3/KCNK3/CHD7/NIPAL4/SLC25A22/BHLHA15/SCN5A/PDE4B/KCNQ5/SLC39A10	60
GO:1901863	GO:1901863	positive regulation of muscle tissue development	12/1060	58/12280	0.00345264	0.0303757	0.0237657	IGF1/EDN1/TGFB1/TBX2/ARNTL/FGF2/MYOCD/NRG1/SHH/GREM1/MIR222/MIR17HG	12
GO:0050864	GO:0050864	regulation of B cell activation	14/1060	73/12280	0.00346325	0.0304136	0.0237953	NFATC2/IL27RA/TGFB1/TNFAIP3/INHBA/IL6/MMP14/CASP3/GPR183/CLCF1/IRS2/SLC39A10/CARD11/MIR17HG	14
GO:0030858	GO:0030858	positive regulation of epithelial cell differentiation	9/1060	37/12280	0.00348951	0.030478	0.0238457	PRKCH/SERPINE1/CYP27B1/SOX9/LIF/BMP6/GDNF/ATOH8/CD24	9
GO:0032722	GO:0032722	positive regulation of chemokine production	9/1060	37/12280	0.00348951	0.030478	0.0238457	IL4R/HMOX1/HIF1A/IL1RL1/IL1B/HAVCR2/IL6/IL33/CSF1R	9
GO:0090049	GO:0090049	regulation of cell migration involved in sprouting angiogenesis	9/1060	37/12280	0.00348951	0.030478	0.0238457	PTGS2/HMOX1/VEGFA/DLL4/FGF2/MMRN2/FOXC2/GATA2/MIR221	9
GO:0030193	GO:0030193	regulation of blood coagulation	11/1060	51/12280	0.0035835	0.0310572	0.0242989	CD9/PLAUR/EDN1/PDGFB/SERPINE1/ADTRP/UBASH3B/PRKCD/THBD/PDGFA/SERPINB2	11
GO:1900046	GO:1900046	regulation of hemostasis	11/1060	51/12280	0.0035835	0.0310572	0.0242989	CD9/PLAUR/EDN1/PDGFB/SERPINE1/ADTRP/UBASH3B/PRKCD/THBD/PDGFA/SERPINB2	11
GO:1902041	GO:1902041	regulation of extrinsic apoptotic signaling pathway via death domain receptors	11/1060	51/12280	0.0035835	0.0310572	0.0242989	ICAM1/TIMP3/HMOX1/TNFRSF10A/SERPINE1/FASLG/TNFAIP3/SKIL/BMPR1B/MIR222/MIR221	11
GO:1990823	GO:1990823	response to leukemia inhibitory factor	15/1060	81/12280	0.00358797	0.0310572	0.0242989	JARID2/ICAM1/GNPNAT1/SMAD7/NR5A2/GFPT2/SPRY2/SSTR1/VEGFC/MRAS/HK2/LAPTM5/PCOLCE2/B3GNT2/SOCS3	15
GO:1990830	GO:1990830	cellular response to leukemia inhibitory factor	15/1060	81/12280	0.00358797	0.0310572	0.0242989	JARID2/ICAM1/GNPNAT1/SMAD7/NR5A2/GFPT2/SPRY2/SSTR1/VEGFC/MRAS/HK2/LAPTM5/PCOLCE2/B3GNT2/SOCS3	15
GO:0048635	GO:0048635	negative regulation of muscle organ development	10/1060	44/12280	0.00361374	0.0311685	0.0243859	JARID2/TGFB1/DKK1/RGS4/BMP2/MYOCD/CXADR/EPHB1/MIR222/MIR17HG	10
GO:0060688	GO:0060688	regulation of morphogenesis of a branching structure	10/1060	44/12280	0.00361374	0.0311685	0.0243859	SOX8/TGFB1/VEGFA/PGF/SOX9/SHH/GREM1/GDNF/TACSTD2/PDGFA	10
GO:0006874	GO:0006874	cellular calcium ion homeostasis	36/1060	263/12280	0.00373669	0.0321715	0.0251707	BAK1/ATP2B4/EDN1/P2RX5/ITPR3/BDKRB1/TGFB1/GRIN2D/PIK3CG/CXCL12/CCL7/TACR1/FASLG/PTGFR/MCHR1/DIAPH1/DLG4/TRPC4/ATP13A3/FGF2/CASQ1/ABL2/GSTO1/UBASH3B/ATP2B2/STC1/ADORA1/KISS1/KCNK3/CHD7/CALB2/GPR4/GATA2/GPR157/TGM2/CD24	36
GO:1902106	GO:1902106	negative regulation of leukocyte differentiation	13/1060	66/12280	0.00374687	0.0322017	0.0251943	RUNX3/CBFB/FSTL3/IL4R/SMAD7/GPR68/INHBA/PIK3R1/UBASH3B/RUNX1/SHH/TRIB1/GATA2	13
GO:0003407	GO:0003407	neural retina development	8/1060	31/12280	0.00391999	0.0336297	0.0263116	SOX8/ATP2B4/DLX2/SOX9/DLL4/ATP8A2/DLX1/DIO3	8
GO:0043502	GO:0043502	regulation of muscle adaptation	14/1060	74/12280	0.00394042	0.0337451	0.0264019	JARID2/IGF1/TNFRSF1B/CAMK2B/ATP2B4/LMCD1/EDN1/SGCA/ERRFI1/RGS4/NR4A3/CASQ1/SCN5A/MIR17HG	14
GO:0006873	GO:0006873	cellular ion homeostasis	50/1060	396/12280	0.00397605	0.0339899	0.0265934	BAK1/SLC4A7/SLC4A8/ATP2B4/EDN1/P2RX5/ITPR3/HMOX1/HIF1A/BDKRB1/TGFB1/GRIN2D/PIK3CG/CXCL12/CCL7/SLC30A3/TACR1/FASLG/PTGFR/MT2A/MCHR1/SCO2/DIAPH1/DLG4/TRPC4/ATP13A3/FGF2/CASQ1/ABL2/GSTO1/BMP6/UBASH3B/KCNMA1/ATP2B2/STC1/ADORA1/MT1E/KISS1/KCNK3/CHD7/CALB2/P2RY2/GPR4/GATA2/GPR157/MT1X/SLC39A10/TGM2/SLC26A6/CD24	50
GO:0060350	GO:0060350	endochondral bone morphogenesis	12/1060	59/12280	0.00400161	0.034148	0.0267171	FGFR3/COMP/SOX9/BMPR1B/BMP6/FGF18/MMP14/STC1/NPPC/PHOSPHO1/COL27A1/SCX	12
GO:1903707	GO:1903707	negative regulation of hemopoiesis	18/1060	106/12280	0.00401975	0.0342423	0.0267909	RUNX3/CBFB/FSTL3/IL4R/SMAD7/HES1/GPR68/INHBA/PIK3R1/UBASH3B/RUNX1/SHH/KLF13/TRIB1/GATA2/HES5/MIR222/MIR221	18
GO:0048565	GO:0048565	digestive tract development	16/1060	90/12280	0.00409051	0.0347837	0.0272145	PRDM1/GLI2/TCF7/ITGA6/HIF1A/TGFB1/HES1/TBX2/STRA6/MYOCD/SHH/DACT1/RET/CLMP/CXCL8/NKX2-6	16
GO:0050801	GO:0050801	ion homeostasis	60/1060	494/12280	0.00413584	0.0349878	0.0273741	BAK1/SLC4A7/SLC4A8/ATP2B4/PICALM/EDN1/P2RX5/SLC7A8/ITPR3/HMOX1/HIF1A/BDKRB1/SMAD7/TGFB1/GRIN2D/PIK3CG/CXCL12/CCL7/CYP27B1/SLC30A3/TACR1/FASLG/PTGFR/MT2A/WNK4/MCHR1/SCO2/DIAPH1/DLG4/TRPC4/ATP13A3/HCN4/FGF2/CASQ1/ABL2/GSTO1/BMP6/UBASH3B/KCNMA1/ATP2B2/CNNM4/STC1/ADORA1/STEAP1/MT1E/KISS1/KCNK3/CHD7/CALB2/P2RY2/GPR4/GATA2/GPR157/SCN5A/MT1X/SLC39A10/TGM2/MLLT11/SLC26A6/CD24	60
GO:0010543	GO:0010543	regulation of platelet activation	6/1060	19/12280	0.00414348	0.0349878	0.0273741	CD9/PDGFB/UBASH3B/PRKCD/THBD/PDGFA	6
GO:0050927	GO:0050927	positive regulation of positive chemotaxis	6/1060	19/12280	0.00414348	0.0349878	0.0273741	CXCL12/VEGFA/PGF/VEGFC/ITGA2/CXCL8	6
GO:0060384	GO:0060384	innervation	6/1060	19/12280	0.00414348	0.0349878	0.0273741	ITGA4/PRKCG/RET/CHD7/FBXO45/COL25A1	6
GO:0003073	GO:0003073	regulation of systemic arterial blood pressure	11/1060	52/12280	0.00419837	0.0352625	0.0275891	EDN1/KCNK6/PDGFB/NCALD/ASIC2/TPM1/REN/PLCB3/ADORA1/NAV2/ADRB2	11
GO:0032642	GO:0032642	regulation of chemokine production	11/1060	52/12280	0.00419837	0.0352625	0.0275891	IL4R/HMOX1/HIF1A/IL1RL1/CXCL6/IL1B/HAVCR2/IL6/IL33/EPHA2/CSF1R	11
GO:0048008	GO:0048008	platelet-derived growth factor receptor signaling pathway	11/1060	52/12280	0.00419837	0.0352625	0.0275891	PDGFB/VEGFA/CBLB/NR4A3/PTPN12/MYOCD/CSRNP1/PTPRJ/MYO1E/PDGFA/MIR221	11
GO:0060428	GO:0060428	lung epithelium development	7/1060	25/12280	0.00420522	0.0352625	0.0275891	ERRFI1/SOX9/KLF2/STRA6/SHH/WNT7B/ADAMTSL2	7
GO:0048469	GO:0048469	cell maturation	19/1060	115/12280	0.00433757	0.0363093	0.0284081	SOX8/POU2F2/CBFB/GAL/NRCAM/HIF1A/ERCC2/VEGFA/HES1/EREG/KLF2/REN/NPPC/RET/PDE3A/GATA2/BHLHA15/HES5/SLC26A6	19
GO:0006869	GO:0006869	lipid transport	33/1060	238/12280	0.00438752	0.0366639	0.0286855	SYT7/GAL/EDN1/OSBPL6/ABCB1/PITPNM3/KCNN4/PPARD/PLA2G4A/INHBA/IL1B/ATP8A2/STRA6/NPC1/REN/ANO7/BMP6/PITPNC1/ESYT3/PRKCD/SHH/NKX3-1/MFSD2A/C2CD2L/SLCO2A1/ABCA13/TNFAIP8L3/OSBP2/IRS2/AKR1C1/MFSD2B/ATP10A/ITGB3	33
GO:0016202	GO:0016202	regulation of striated muscle tissue development	18/1060	107/12280	0.00445356	0.0371515	0.029067	JARID2/IGF1/EDN1/TGFB1/DKK1/RGS4/TBX2/BMP2/ARNTL/FGF2/MYOCD/CXADR/EPHB1/NRG1/SHH/GREM1/MIR222/MIR17HG	18
GO:0007498	GO:0007498	mesoderm development	15/1060	83/12280	0.00455892	0.0378994	0.0296522	TIE1/RPS6KA6/DKK1/VEGFA/NR4A3/INHBA/SNAI1/TBX3/EPHA2/HMGA2/ITGA2/SHH/FOXC2/ITGB3/SCX	15
GO:0043500	GO:0043500	muscle adaptation	15/1060	83/12280	0.00455892	0.0378994	0.0296522	JARID2/IGF1/TNFRSF1B/CAMK2B/ATP2B4/LMCD1/EDN1/HMOX1/ERRFI1/RGS4/NR4A3/IL1B/GATM/TCAP/MIR17HG	15
GO:0003158	GO:0003158	endothelium development	16/1060	91/12280	0.00457608	0.0379116	0.0296617	ICAM1/EZR/FGF1/IL1B/ID1/RAP1B/RHOB/MSN/BMP6/NRG1/XDH/F11R/STC1/HEY1/ATOH8/WNT7B	16
GO:0050921	GO:0050921	positive regulation of chemotaxis	16/1060	91/12280	0.00457608	0.0379116	0.0296617	EDN1/PDGFB/TGFB1/SERPINE1/CXCL12/CCL7/VEGFA/PGF/IL6/FGF2/VEGFC/FGF18/ITGA2/STX3/IL12A/CXCL8	16
GO:0055082	GO:0055082	cellular chemical homeostasis	60/1060	497/12280	0.00472292	0.0390612	0.0305611	BAK1/SLC4A7/SLC4A8/ATP2B4/EDN1/P2RX5/NOX4/ICAM1/ITPR3/HMOX1/HIF1A/BDKRB1/TGFB1/GRIN2D/PIK3CG/CXCL12/CCL7/SLC30A3/TACR1/FASLG/GPR68/PTGFR/MT2A/MCHR1/SCO2/DIAPH1/DLG4/TRPC4/ATP13A3/FGF2/CASQ1/ABL2/PIK3R1/GSTO1/BMP6/UBASH3B/KCNMA1/HK1/ATP2B2/STC1/HK2/ADORA1/MT1E/KISS1/KCNK3/CHD7/CALB2/C2CD2L/P2RY2/GPR4/ERN1/GATA2/GPR157/IRS2/MT1X/SLC39A10/TGM2/MIR103A2/SLC26A6/CD24	60
GO:0001701	GO:0001701	in utero embryonic development	36/1060	267/12280	0.00478612	0.0395162	0.0309171	SOX8/IGF1/PRDM1/TIE1/GLI2/EDN1/PDGFB/HIF1A/ERCC2/APBA1/ZPR1/VEGFA/PCDH12/HES1/SNAI1/BMP2/KLF2/LIF/TBX3/SKIL/TPM1/RSPO3/PTPRR/MYO1E/MSX1/CSF2/HEY1/E2F7/SPINT1/JUNB/CHD7/FOSL1/GATA2/SOCS3/JAG2/WNT7B	36
GO:0032965	GO:0032965	regulation of collagen biosynthetic process	8/1060	32/12280	0.0048387	0.0397465	0.0310973	TGFB1/PPARD/ERRFI1/IL6/NPPC/ITGA2/SCX/MIR29A	8
GO:0045104	GO:0045104	intermediate filament cytoskeleton organization	8/1060	32/12280	0.0048387	0.0397465	0.0310973	PKP1/DSP/NEFM/ATP8A2/SHH/DES/FAM83H/EPPK1	8
GO:1902042	GO:1902042	negative regulation of extrinsic apoptotic signaling pathway via death domain receptors	8/1060	32/12280	0.0048387	0.0397465	0.0310973	ICAM1/HMOX1/TNFRSF10A/SERPINE1/FASLG/TNFAIP3/MIR222/MIR221	8
GO:0014032	GO:0014032	neural crest cell development	13/1060	68/12280	0.00489593	0.0397993	0.0311386	SOX8/EDN1/HIF1A/HES1/SOX9/SEMA6D/SEMA7A/NRG1/KBTBD8/SHH/RET/GBX2/GDNF	13
GO:0009309	GO:0009309	amine biosynthetic process	5/1060	14/12280	0.00490282	0.0397993	0.0311386	SMOX/ODC1/AGMAT/AMD1/SAT1	5
GO:0034616	GO:0034616	response to laminar fluid shear stress	5/1060	14/12280	0.00490282	0.0397993	0.0311386	SMAD7/TGFB1/KLF2/ETS1/SMAD6	5
GO:0036037	GO:0036037	CD8-positive, alpha-beta T cell activation	5/1060	14/12280	0.00490282	0.0397993	0.0311386	RUNX3/CBFB/CD274/SH3RF1/RUNX1	5
GO:0042401	GO:0042401	cellular biogenic amine biosynthetic process	5/1060	14/12280	0.00490282	0.0397993	0.0311386	SMOX/ODC1/AGMAT/AMD1/SAT1	5
GO:0060080	GO:0060080	inhibitory postsynaptic potential	5/1060	14/12280	0.00490282	0.0397993	0.0311386	RIMS1/NPAS4/RIMS2/INSYN2/NPAS4	5
GO:0150077	GO:0150077	regulation of neuroinflammatory response	5/1060	14/12280	0.00490282	0.0397993	0.0311386	IL1B/IL6/IL33/MMP3/FAM19A3	5
GO:0048634	GO:0048634	regulation of muscle organ development	18/1060	108/12280	0.00492517	0.0399137	0.0312281	JARID2/IGF1/EDN1/TGFB1/DKK1/RGS4/TBX2/BMP2/ARNTL/FGF2/MYOCD/CXADR/EPHB1/NRG1/SHH/GREM1/MIR222/MIR17HG	18
GO:0030003	GO:0030003	cellular cation homeostasis	49/1060	391/12280	0.00500757	0.0405135	0.0316974	BAK1/SLC4A7/SLC4A8/ATP2B4/EDN1/P2RX5/ITPR3/HMOX1/HIF1A/BDKRB1/TGFB1/GRIN2D/PIK3CG/CXCL12/CCL7/SLC30A3/TACR1/FASLG/PTGFR/MT2A/MCHR1/SCO2/DIAPH1/DLG4/TRPC4/ATP13A3/FGF2/CASQ1/ABL2/GSTO1/BMP6/UBASH3B/KCNMA1/ATP2B2/STC1/ADORA1/MT1E/KISS1/KCNK3/CHD7/CALB2/GPR4/GATA2/GPR157/MT1X/SLC39A10/TGM2/SLC26A6/CD24	49
GO:0051348	GO:0051348	negative regulation of transferase activity	32/1060	231/12280	0.00504448	0.0405347	0.031714	GCKR/GADD45B/SMAD7/CBLB/ERRFI1/RGS4/TNFAIP3/DUSP1/DUSP4/IL1B/PTPN22/SPRY2/DUSP5/RGS3/MYOCD/RUBCN/PTPRJ/UBASH3B/DUSP2/PRKCD/DUSP7/CASP3/PKIA/TRIB1/SH3BP5L/SOCS3/IRS2/SPRY4/IPO7/MIR138-1/DBNDD2/PINX1	32
GO:0008625	GO:0008625	extrinsic apoptotic signaling pathway via death domain receptors	14/1060	76/12280	0.00505505	0.0405347	0.031714	ICAM1/TIMP3/HMOX1/TNFRSF10A/SERPINE1/FASLG/TNFAIP3/NGF/SKIL/BMPR1B/PIK3R1/CRADD/MIR222/MIR221	14
GO:0048010	GO:0048010	vascular endothelial growth factor receptor signaling pathway	14/1060	76/12280	0.00505505	0.0405347	0.031714	SH2D2A/PXN/HIF1A/FLT1/VEGFA/NCF2/PGF/IL1B/PIK3R1/VEGFC/FGF18/ITGA5/MMRN2/ITGB3	14
GO:0048593	GO:0048593	camera-type eye morphogenesis	14/1060	76/12280	0.00505505	0.0405347	0.031714	SOX8/BAK1/HIF1A/PITX3/VEGFA/TBX2/SOX9/ATP8A2/STRA6/BCAR3/EPHA2/EPHB1/DIO3/TENM3	14
GO:0001659	GO:0001659	temperature homeostasis	20/1060	125/12280	0.00505583	0.0405347	0.031714	PTGS2/IL4R/VEGFA/PRLR/G0S2/IL1B/ID1/GADD45G/ARNTL/PRDM16/PLCL2/PPARGC1B/ACOT11/ADORA1/FABP5/ADRB2/GATM/FOXC2/GPR3/DIO2	20
GO:0071385	GO:0071385	cellular response to glucocorticoid stimulus	10/1060	46/12280	0.00507242	0.0405347	0.031714	EDN1/ICAM1/TGFB1/NR3C1/ERRFI1/EIF4E/STC1/GJB2/NPAS4/NPAS4	10
GO:0071674	GO:0071674	mononuclear cell migration	10/1060	46/12280	0.00507242	0.0405347	0.031714	PDGFB/FLT1/TGFB1/SERPINE1/CXCL12/CCL7/CCL20/DUSP1/IL6/GREM1	10
GO:0007566	GO:0007566	embryo implantation	9/1060	39/12280	0.00508572	0.0405347	0.031714	PTGS2/TIMP1/ARHGDIB/PPARD/PRLR/AGO2/IL1B/LIF/STC1	9
GO:0021536	GO:0021536	diencephalon development	9/1060	39/12280	0.00508572	0.0405347	0.031714	GLI2/HES1/BMP2/ETS1/MSX1/SHH/GBX2/GATA2/NKX2-6	9
GO:0015849	GO:0015849	organic acid transport	28/1060	195/12280	0.00512089	0.0406808	0.0318283	SLC38A5/ABCC2/EDN1/SLC1A3/SLC7A8/SLC7A6/APBA1/SLC16A6/FOLR3/PPARD/PLA2G4A/RGS4/SLC19A2/IL1B/TRPC4/LRRC8A/STRA6/SLC16A2/ADORA1/SLC13A4/MFSD2A/LRRC8C/SLCO2A1/SLC25A22/IRS2/AKR1C1/SLC6A17/SLC26A6	28
GO:0046942	GO:0046942	carboxylic acid transport	28/1060	195/12280	0.00512089	0.0406808	0.0318283	SLC38A5/ABCC2/EDN1/SLC1A3/SLC7A8/SLC7A6/APBA1/SLC16A6/FOLR3/PPARD/PLA2G4A/RGS4/SLC19A2/IL1B/TRPC4/LRRC8A/STRA6/SLC16A2/ADORA1/SLC13A4/MFSD2A/LRRC8C/SLCO2A1/SLC25A22/IRS2/AKR1C1/SLC6A17/SLC26A6	28
GO:0071695	GO:0071695	anatomical structure maturation	19/1060	117/12280	0.00525749	0.0416973	0.0326236	IGF1/NSUN2/FGFR3/GAL/NRCAM/HIF1A/FERMT1/XYLT1/ERCC2/LYL1/EREG/BMP2/KLF2/NPPC/RET/GREM1/PDE3A/PHOSPHO1/RFLNB	19
GO:0019722	GO:0019722	calcium-mediated signaling	21/1060	134/12280	0.00528599	0.0418546	0.0327467	IGF1/ATP2B4/LMCD1/EDN1/P2RX5/LAT2/NFATC2/HOMER2/NCALD/GRIN2D/CCL20/NR5A2/PTGFR/CASQ1/GSTO1/PTPRJ/NRG1/CXCL8/MCTP1/SPHK1/BHLHA15	21
GO:0006970	GO:0006970	response to osmotic stress	12/1060	61/12280	0.00530914	0.0419691	0.0328362	PTGS2/ABCB1/ERRFI1/LRRC8A/KCNMA1/MAPK13/TSC22D3/ITGA2/CASP3/LRRC8C/PLK3/RCSD1	12
GO:0090162	GO:0090162	establishment of epithelial cell polarity	7/1060	26/12280	0.00533326	0.0420909	0.0329315	FERMT1/SIPA1L3/HES1/FRMD4B/MSN/FRMD4A/HES5	7
GO:0035690	GO:0035690	cellular response to drug	36/1060	269/12280	0.00539821	0.042534	0.0332782	PTGS2/EDN1/ICAM1/HMOX1/PDGFB/TGFB1/PPIF/CCL7/CD69/NR3C1/ERRFI1/TNFAIP3/NR4A3/MT2A/SOX9/IL1B/ID1/RAP1B/KLF2/PTPN22/ETS1/IL6/REN/RHOB/ANKRD1/HMGA2/MMP3/EIF4E/MAPK13/MSX1/PRKCD/GJB2/NKX3-1/NET1/P2RY2/PDE4B	36
GO:0071901	GO:0071901	negative regulation of protein serine/threonine kinase activity	18/1060	109/12280	0.00543697	0.0427001	0.0334082	RGS4/TNFAIP3/DUSP1/DUSP4/IL1B/PTPN22/SPRY2/DUSP5/RGS3/MYOCD/PTPRJ/DUSP2/PRKCD/DUSP7/CASP3/PKIA/SPRY4/IPO7	18
GO:1901861	GO:1901861	regulation of muscle tissue development	18/1060	109/12280	0.00543697	0.0427001	0.0334082	JARID2/IGF1/EDN1/TGFB1/DKK1/RGS4/TBX2/BMP2/ARNTL/FGF2/MYOCD/CXADR/EPHB1/NRG1/SHH/GREM1/MIR222/MIR17HG	18
GO:0030851	GO:0030851	granulocyte differentiation	6/1060	20/12280	0.00549343	0.0428647	0.0335369	CSF3/RUNX1/CSF2/TRIB1/GATA2/EVI2B	6
GO:0046639	GO:0046639	negative regulation of alpha-beta T cell differentiation	6/1060	20/12280	0.00549343	0.0428647	0.0335369	RUNX3/CBFB/IL4R/SMAD7/RUNX1/SHH	6
GO:0048710	GO:0048710	regulation of astrocyte differentiation	6/1060	20/12280	0.00549343	0.0428647	0.0335369	HES1/BMP2/LIF/ID4/CLCF1/HES5	6
GO:0090050	GO:0090050	positive regulation of cell migration involved in sprouting angiogenesis	6/1060	20/12280	0.00549343	0.0428647	0.0335369	PTGS2/HMOX1/VEGFA/FGF2/FOXC2/GATA2	6
GO:0048167	GO:0048167	regulation of synaptic plasticity	20/1060	126/12280	0.00553645	0.0431308	0.0337451	SYT7/CAMK2B/PTGS2/RIMS1/ITPR3/GRIN2D/TSHZ3/DLG4/DGKI/ADORA1/NETO1/STX3/CALB2/SYT12/NPAS4/MCTP1/RIMS2/ARC/SHANK3/NPAS4	20
GO:0055080	GO:0055080	cation homeostasis	54/1060	442/12280	0.00561753	0.0436919	0.0341841	BAK1/SLC4A7/SLC4A8/ATP2B4/PICALM/EDN1/P2RX5/SLC7A8/ITPR3/HMOX1/HIF1A/BDKRB1/TGFB1/GRIN2D/PIK3CG/CXCL12/CCL7/CYP27B1/SLC30A3/TACR1/FASLG/PTGFR/MT2A/MCHR1/SCO2/DIAPH1/DLG4/TRPC4/ATP13A3/FGF2/CASQ1/ABL2/GSTO1/BMP6/UBASH3B/KCNMA1/ATP2B2/CNNM4/STC1/ADORA1/STEAP1/MT1E/KISS1/KCNK3/CHD7/CALB2/GPR4/GATA2/GPR157/MT1X/SLC39A10/TGM2/SLC26A6/CD24	54
GO:0050818	GO:0050818	regulation of coagulation	11/1060	54/12280	0.00567855	0.0440955	0.0344999	CD9/PLAUR/EDN1/PDGFB/SERPINE1/ADTRP/UBASH3B/PRKCD/THBD/PDGFA/SERPINB2	11
GO:0003206	GO:0003206	cardiac chamber morphogenesis	16/1060	93/12280	0.00568846	0.0441015	0.0345046	DSP/HIF1A/SMAD7/PPP1R13L/TGFB1/HES1/TBX2/DLL4/TBX3/SMAD6/TPM1/NRG1/HEYL/HEY1/CHD7/MIR17HG	16
GO:0090066	GO:0090066	regulation of anatomical structure size	48/1060	384/12280	0.00570553	0.044163	0.0345527	TNFRSF12A/FSTL4/PTGS2/PICALM/MAP2/EDN1/PPP1R15A/ICAM1/NRCAM/EZR/HMOX1/KCNN4/COMP/CXCL12/CSF3/ASIC2/PPARD/VEGFA/TTL/VASP/BAIAP2L2/RAP1GAP2/ACTR3B/NGF/LRRC8A/TMOD1/ARPC5L/SEMA6D/SPTBN5/SEMA7A/MSN/DOCK5/KCNMA1/CARMIL2/DRAXIN/NPPC/ADORA1/PRKCD/RET/ISLR2/RAB3B/ADRB2/LRRC8C/P2RY2/HTR1D/WNT7B/FMN1/SHANK3	48
GO:0001704	GO:0001704	formation of primary germ layer	15/1060	85/12280	0.00573331	0.0442362	0.03461	DKK1/ITGA4/NR4A3/INHBA/SNAI1/EPHA2/HMGA2/MMP14/ITGA5/ITGA2/ATOH8/SOX7/LAMB3/ITGB3/SCX	15
GO:0060349	GO:0060349	bone morphogenesis	15/1060	85/12280	0.00573331	0.0442362	0.03461	FGFR3/TGFB1/COMP/SOX9/BMPR1B/BMP6/FGF18/MMP14/STC1/MSX1/NPPC/HAS2/PHOSPHO1/COL27A1/SCX	15
GO:0045103	GO:0045103	intermediate filament-based process	8/1060	33/12280	0.00591365	0.0454505	0.0355601	PKP1/DSP/NEFM/ATP8A2/SHH/DES/FAM83H/EPPK1	8
GO:0051150	GO:0051150	regulation of smooth muscle cell differentiation	8/1060	33/12280	0.00591365	0.0454505	0.0355601	PDGFB/NFATC2/OLFM2/TGFB1/EREG/MYOCD/SHH/MIR221	8
GO:0043583	GO:0043583	ear development	22/1060	144/12280	0.0059496	0.0454505	0.0355601	SLC4A7/USH2A/GLI2/EDN1/TGFB1/HES1/NR4A3/SOX9/BMP2/ATP8A2/SPRY2/STRA6/MSX1/SHH/GJB2/GBX2/KCNK3/CHD7/TCAP/GATA2/JAG2/HES5	22
GO:0007586	GO:0007586	digestion	10/1060	47/12280	0.00595656	0.0454505	0.0355601	PRSS3/EZR/KCNN4/SGK1/SOX9/WNK4/UCN2/F11R/AKR1C1/SLC26A6	10
GO:0030166	GO:0030166	proteoglycan biosynthetic process	10/1060	47/12280	0.00595656	0.0454505	0.0355601	IGF1/VCAN/XYLT1/CHST3/HS3ST3B1/BMPR1B/CSGALNACT2/CHST11/CSPG4/CHSY3	10
GO:0043388	GO:0043388	positive regulation of DNA binding	10/1060	47/12280	0.00595656	0.0454505	0.0355601	PLAUR/IGF1/ERCC2/TGFB1/HES1/NGF/MYOCD/HMGA2/ITGA2/PINX1	10
GO:0060393	GO:0060393	regulation of pathway-restricted SMAD protein phosphorylation	10/1060	47/12280	0.00595656	0.0454505	0.0355601	SMAD7/TGFB1/DKK1/SNX25/INHBA/PMEPA1/BMP2/SMAD6/BMP6/GREM1	10
GO:0031646	GO:0031646	positive regulation of neurological system process	9/1060	40/12280	0.00607075	0.0462488	0.0361846	RIMS1/STX1A/RGS4/DLG4/ITGA2/NETO1/ADRB2/RIMS2/SHANK3	9
GO:0002695	GO:0002695	negative regulation of leukocyte activation	17/1060	102/12280	0.00617812	0.0469926	0.0367666	RUNX3/CBFB/GAL/IL4R/HMOX1/SMAD7/TGFB1/TNFAIP3/CD274/INHBA/IL13RA2/PTPN22/HAVCR2/RUNX1/CASP3/SHH/FAM19A3	17
GO:0045444	GO:0045444	fat cell differentiation	25/1060	171/12280	0.00626934	0.0476115	0.0372508	SOX8/PTGS2/ITGA6/IL11/MEDAG/TGFB1/PPARD/HES1/NR4A3/NR4A1/BMP2/ARNTL/IL6/SMAD6/PRDM16/HMGA2/ADRB2/LRRC8C/ID4/METRNL/GATA2/C1QL4/LAMB3/MIR103A2/CCDC71L	25
GO:0048864	GO:0048864	stem cell development	13/1060	70/12280	0.006312	0.0476338	0.0372682	SOX8/EDN1/HIF1A/HES1/SOX9/SEMA6D/SEMA7A/NRG1/KBTBD8/SHH/RET/GBX2/GDNF	13
GO:0050729	GO:0050729	positive regulation of inflammatory response	13/1060	70/12280	0.006312	0.0476338	0.0372682	PTGS2/PIK3CG/SERPINE1/IL1RL1/IL1B/ETS1/IL6/IL33/NFKBIZ/MAPK13/ITGA2/FAM19A3/TGM2	13
GO:0097530	GO:0097530	granulocyte migration	13/1060	70/12280	0.006312	0.0476338	0.0372682	EDN1/CXCL2/PIK3CG/CCL7/CCL20/CXCL6/IL1B/ITGA9/CXADR/CXCL3/CXCL5/CXCL8/PDE4B	13
GO:0046879	GO:0046879	hormone secretion	28/1060	198/12280	0.00632121	0.0476338	0.0372682	SYT7/GAL/EDN1/IL11/ITPR3/HIF1A/STX1A/PPARD/GPR68/INHBA/IL1B/LIF/VGF/ARNTL/TBX3/IL6/REN/BMP6/ADORA1/NKX3-1/KISS1/KCNS3/CHD7/C2CD2L/RIMS2/IRS2/FOXD1/DOC2B	28
GO:0002576	GO:0002576	platelet degranulation	16/1060	94/12280	0.00632159	0.0476338	0.0372682	CD9/IGF1/RAB27B/TIMP3/PDGFB/TIMP1/TGFB1/SERPINE1/VWF/VEGFA/HABP4/FERMT3/VEGFC/PDGFA/TOR4A/ITGB3	16
GO:0023061	GO:0023061	signal release	39/1060	300/12280	0.00635285	0.0477948	0.0373942	SYN1/SYT7/GAL/EDN1/RIMS1/IL11/ITPR3/HIF1A/STX1A/APBA1/PPARD/KCNC4/GPR68/INHBA/IL1B/PRKCG/RAP1B/LIF/VGF/ARNTL/TBX3/IL6/REN/BMP6/DGKI/ADORA1/STX3/NKX3-1/KISS1/KCNS3/CHD7/C2CD2L/SYT12/MCTP1/RIMS2/SYN3/IRS2/FOXD1/DOC2B	39
GO:0032411	GO:0032411	positive regulation of transporter activity	14/1060	78/12280	0.00641087	0.0481563	0.037677	GAL/CACNG4/ABCB1/SGK1/WNK4/STAC2/CASQ1/GSTO1/LRRC38/PRKCD/ADRB2/PDZK1/ARC/SHANK3	14
GO:0045666	GO:0045666	positive regulation of neuron differentiation	38/1060	291/12280	0.00651205	0.0488404	0.0382123	TNFRSF12A/CNTN1/CAMK2B/GLI2/PLXNA2/RIMS1/NRCAM/CXCL12/DKK1/CAPRIN2/VEGFA/DLX2/SOCS2/PACSIN1/CPNE5/BMP2/DLG4/ATP8A2/NGF/SKIL/SEMA7A/ABL2/DLX1/ANKRD1/BMP6/GRIP1/HEYL/RET/ISLR2/IL1RAPL1/RIMS2/GATA2/CREB3L2/SMURF1/MIR222/MIR221/TENM3/SHANK3	38
GO:0042102	GO:0042102	positive regulation of T cell proliferation	11/1060	55/12280	0.00655842	0.0489601	0.0383059	IGF1/HES1/CD274/IL1B/HAVCR2/IL6/SHH/IL12A/CARD11/PNP/CD24	11
GO:0061035	GO:0061035	regulation of cartilage development	11/1060	55/12280	0.00655842	0.0489601	0.0383059	GLI2/PTHLH/TGFB1/SOX9/BMP2/BMPR1B/BMP6/FGF18/GREM1/RFLNB/SCX	11
GO:0071277	GO:0071277	cellular response to calcium ion	11/1060	55/12280	0.00655842	0.0489601	0.0383059	SYT7/EDN1/RASA4/PPIF/CPNE5/FOSB/ALOX5AP/JUNB/SYT12/SCN5A/SYT15	11
GO:0010876	GO:0010876	lipid localization	35/1060	263/12280	0.00657358	0.0489975	0.0383352	ABHD5/SYT7/GAL/EDN1/OSBPL6/ABCB1/PITPNM3/KCNN4/PPARD/PLA2G4A/INHBA/IL1B/ATP8A2/IL6/STRA6/NPC1/REN/ANO7/BMP6/PITPNC1/ESYT3/PRKCD/SHH/NKX3-1/MFSD2A/C2CD2L/SLCO2A1/ABCA13/TNFAIP8L3/OSBP2/IRS2/AKR1C1/MFSD2B/ATP10A/ITGB3	35
GO:0030308	GO:0030308	negative regulation of cell growth	23/1060	154/12280	0.00659481	0.04908	0.0383998	FSTL4/DCBLD2/GAL/MAP2/BDKRB1/TGFB1/CAPRIN2/CYP27B1/PPARD/RGS4/INHBA/SEMA6D/SEMA7A/PTPRJ/DRAXIN/MSX1/OSGIN2/DCSTAMP/GREM1/GNG4/MINAR1/SERTAD2/OSTN	23
GO:0046627	GO:0046627	negative regulation of insulin receptor signaling pathway	7/1060	27/12280	0.0066737	0.0494386	0.0386803	GRB14/SOCS2/IL1B/PTPRE/PRKCD/SOCS3/MIR103A2	7
GO:1900077	GO:1900077	negative regulation of cellular response to insulin stimulus	7/1060	27/12280	0.0066737	0.0494386	0.0386803	GRB14/SOCS2/IL1B/PTPRE/PRKCD/SOCS3/MIR103A2	7
GO:1903671	GO:1903671	negative regulation of sprouting angiogenesis	7/1060	27/12280	0.0066737	0.0494386	0.0386803	KLF2/DLL4/MMRN2/MIR377/MIR222/MIR221/MIR138-1	7

## Sheet: GO_Q_to_6h_down
	ID	Description	GeneRatio	BgRatio	pvalue	p.adjust	qvalue	geneID	Count
GO:2000027	GO:2000027	regulation of animal organ morphogenesis	38/975	157/12280	3.12841e-10	1.49194e-06	1.21679e-06	DVL2/MKS1/HGF/FOXC1/NTN4/GPC4/TBX5/TGFB2/PARD6A/WNT2/TGFBR1/GATA3/GLI1/STAT1/TWIST1/RUNX2/BMP4/SIX1/FOXP2/SMO/PIM1/RSPO2/NFIB/DAB2/FZD7/SPRY1/HAND2/CITED2/ROR2/AR/BCL2/MLLT3/CD34/FZD4/FZD2/ROR1/LGR4/ETV5	38
GO:0007389	GO:0007389	pattern specification process	53/975	284/12280	3.18137e-09	7.58597e-06	6.18692e-06	CYP26B1/DVL2/MKS1/HOXC8/DNAH5/CC2D2A/FOXC1/CDON/TULP3/TBX5/IFT74/MID1/NDRG4/WNT2/HOXA2/LFNG/HOXA5/HOXA6/GLI3/TGFBR1/GLI1/BMP5/APC2/MSX2/HOXA7/BHLHE41/BMP4/SIX1/SMO/ALDH1A2/FOXA1/SETDB2/IFT172/MNS1/OSR1/DAAM2/TBC1D32/HHEX/BTG2/SPRY1/HAND2/CITED2/SMAD3/AXIN2/ROR2/AR/SMAD1/MLLT3/DDIT3/PBX1/PTCH1/IFT140/LDB1	53
GO:0007507	GO:0007507	heart development	69/975	429/12280	9.74689e-09	1.54943e-05	1.26368e-05	DVL2/MKS1/DNAH5/CC2D2A/FOXC1/CALCRL/ERBB3/TGFBR3/ACACB/TBX5/TGFB2/IFT74/CDKL1/NFATC4/FGF9/NDRG4/WNT2/GLI3/TGFBR1/GATA3/SOX6/GLI1/BMP5/TFDP2/RGS2/MSX2/TWIST1/OBSL1/BMP4/SIX1/SMO/ALDH1A2/PPARG/FHOD3/PDGFRA/HTR2B/SETDB2/PIM1/MAP2K5/IFT172/PLCE1/MYLK3/GATA6/OSR1/ANK2/TBC1D32/ADM/TENM4/PDCD4/AKAP6/SAV1/FZD7/DHRS3/VCAM1/ADAMTS9/SPRY1/HAND2/CITED2/GPER1/SMAD3/COL3A1/AXIN2/EFNA1/SMAD1/INSR/HEG1/FZD2/PTCH…	69
GO:1901615	GO:1901615	organic hydroxy compound metabolic process	59/975	354/12280	3.24239e-08	3.86574e-05	3.1528e-05	CFTR/CYP26B1/MSMO1/IDI1/ALDH3A2/SREBF1/ACACB/FDFT1/TGFB2/SCD/PCK2/SQLE/GATA3/SC5D/MVK/BMP5/HMGCS1/HMGCR/PLCD4/NR1D1/APOL2/ALDH1A2/LDLR/ACSS2/HSD17B7/PSAT1/ITPKA/LHCGR/CYP1B1/CH25H/PLCE1/IMPA2/ITPKB/CYP39A1/VLDLR/SLC7A11/ACSS1/KIT/LSS/IP6K3/DHRS3/HAND2/GPER1/LIPC/MVD/ACOX2/INPP5D/FAXDC2/GPR37/BCL2/GCNT4/LRTOMT/DRD1/INPP5J/MAOA/ADH1B/SULT1C4/INPP5B/MALRD1	59
GO:0033002	GO:0033002	muscle cell proliferation	34/975	157/12280	5.38809e-08	3.95119e-05	3.22249e-05	CX3CL1/FOXC1/CALCRL/TGFBR3/TBX5/TGFB2/FGF9/NDRG4/WNT2/TGFBR1/OGN/PPARGC1A/GLI1/CDKN1B/HMGCR/PDE1A/STAT1/BMP4/SIX1/PPARG/PIM1/MSTN/GATA6/SKP2/TENM4/PDCD4/SAV1/ANGPT1/IL6R/GPER1/SMAD1/SIX5/MAP3K5/MIR503	34
GO:0003002	GO:0003002	regionalization	42/975	218/12280	5.46029e-08	3.95119e-05	3.22249e-05	CYP26B1/DVL2/MKS1/HOXC8/FOXC1/CDON/TULP3/WNT2/HOXA2/LFNG/HOXA5/HOXA6/GLI3/TGFBR1/GLI1/MSX2/HOXA7/BHLHE41/BMP4/SIX1/SMO/ALDH1A2/FOXA1/SETDB2/IFT172/MNS1/OSR1/TBC1D32/HHEX/BTG2/SPRY1/CITED2/SMAD3/AXIN2/ROR2/AR/MLLT3/DDIT3/PBX1/PTCH1/IFT140/LDB1	42
GO:0060537	GO:0060537	muscle tissue development	50/975	285/12280	7.11367e-08	3.95119e-05	3.22249e-05	CYP26B1/FOXC1/CDON/ERBB3/PITX1/TGFBR3/TBX5/TGFB2/FGF9/NDRG4/WNT2/TGFBR1/PPARGC1A/SOX6/GLI1/RIPOR2/BMP5/HMGCR/RGS2/TWIST1/OBSL1/MED20/BMP4/SIX1/FOXP2/SMO/ALDH1A2/FHOD3/PDGFRA/HLX/PIM1/MSTN/MYLK3/GATA6/OSR1/TENM4/AKAP6/SAV1/FZD7/BTG2/ATF3/ADAMTS9/SAP30/SMAD3/COL3A1/SMAD1/BCL2/HEG1/NR1D2/SVIL	50
GO:0014855	GO:0014855	striated muscle cell proliferation	18/975	54/12280	8.36475e-08	3.95119e-05	3.22249e-05	FOXC1/TGFBR3/TBX5/TGFB2/FGF9/NDRG4/WNT2/TGFBR1/GLI1/SIX1/PIM1/MSTN/GATA6/TENM4/SAV1/ANGPT1/SMAD1/SIX5	18
GO:0045165	GO:0045165	cell fate commitment	31/975	138/12280	8.60883e-08	3.95119e-05	3.22249e-05	CYP26B1/CDON/PITX1/WNT2/HOXA2/GLI3/TGFBR1/GATA3/SOX6/APC2/RUNX2/BMP4/SIX1/SMO/FOXA1/PPARG/SOX5/GATA6/TENM4/FZD7/ISL2/ROR2/AR/SMAD1/BCL2/SOX12/GAS1/PTCH1/MITF/ZNF521/MIAT	31
GO:0030326	GO:0030326	embryonic limb morphogenesis	25/975	97/12280	9.11367e-08	3.95119e-05	3.22249e-05	CYP26B1/MKS1/PITX1/TULP3/TBX5/TGFB2/FGF9/GLI3/MSX2/TBX4/TWIST1/RUNX2/BMP4/GDF5/ALDH1A2/OSR1/TBC1D32/RSPO2/BCL2L11/HAND2/OSR2/ROR2/PBX1/PTCH1/IFT140	25
GO:0035113	GO:0035113	embryonic appendage morphogenesis	25/975	97/12280	9.11367e-08	3.95119e-05	3.22249e-05	CYP26B1/MKS1/PITX1/TULP3/TBX5/TGFB2/FGF9/GLI3/MSX2/TBX4/TWIST1/RUNX2/BMP4/GDF5/ALDH1A2/OSR1/TBC1D32/RSPO2/BCL2L11/HAND2/OSR2/ROR2/PBX1/PTCH1/IFT140	25
GO:0050678	GO:0050678	regulation of epithelial cell proliferation	45/975	250/12280	1.49592e-07	5.94505e-05	4.84863e-05	TGFBR3/TGFB2/IFT74/FGF9/RGCC/WNT2/HOXA5/TGFBR1/GATA3/GLI1/CDKN1B/BMP5/THBS4/STAT1/KLF9/TWIST1/BMP4/GDF5/NR1D1/SIX1/FOXP2/SMO/ALDH1A2/CDKN1C/PPARG/HTR2B/MAP2K5/IFT172/VASH2/OSR1/NFIB/CDKN2B/SAV1/FZD7/HMGB2/FMC1/OSR2/VEGFD/SMAD3/AR/MCC/CCL11/PRKD1/PTCH1/MIR503	45
GO:0014706	GO:0014706	striated muscle tissue development	47/975	271/12280	2.50152e-07	9.17673e-05	7.4843e-05	CYP26B1/FOXC1/CDON/ERBB3/PITX1/TGFBR3/TBX5/TGFB2/FGF9/NDRG4/WNT2/TGFBR1/SOX6/GLI1/RIPOR2/BMP5/HMGCR/RGS2/TWIST1/OBSL1/MED20/BMP4/SIX1/FOXP2/SMO/ALDH1A2/FHOD3/PDGFRA/HLX/PIM1/MSTN/MYLK3/GATA6/TENM4/AKAP6/SAV1/FZD7/BTG2/ATF3/ADAMTS9/SAP30/SMAD3/SMAD1/BCL2/HEG1/NR1D2/SVIL	47
GO:0050673	GO:0050673	epithelial cell proliferation	49/975	290/12280	3.15282e-07	9.67952e-05	7.89437e-05	TGFBR3/TGFB2/IFT74/FGF9/RGCC/WNT2/HOXA5/TGFBR1/GATA3/GLI1/CDKN1B/BMP5/THBS4/STAT1/KLF9/TWIST1/BMP4/GDF5/NR1D1/SIX1/FOXP2/SMO/ALDH1A2/CDKN1C/PPARG/HTR2B/MAP2K5/IFT172/VASH2/OSR1/NFIB/CDKN2B/SAV1/FZD7/KIT/HMGB2/FMC1/OSR2/VEGFD/SMAD3/AR/MCC/CCL11/CD34/PRKD1/PTCH1/LGR4/MIR503/NOX5	49
GO:0048598	GO:0048598	embryonic morphogenesis	65/975	432/12280	3.37391e-07	9.67952e-05	7.89437e-05	CYP26B1/DVL2/MKS1/CC2D2A/FOXC1/CDON/PITX1/TULP3/TBX5/MYO15A/TGFB2/FGF9/NDRG4/WNT2/HOXA2/HOXA5/HOXA6/GLI3/TGFBR1/GATA3/GLI1/RIPOR2/BMP5/MSX2/TBX4/HOXA7/TWIST1/RUNX2/BMP4/GDF5/SIX1/SMO/ALDH1A2/CDKN1C/PDGFRA/HTR2B/SETDB2/HLX/FOXF2/MAP2K5/IFT172/LRIG3/GATA6/OSR1/TBC1D32/RSPO2/ADM/TENM4/BCL2L11/FZD7/ARHGAP35/HAND2/OSR2/SMAD3/ROR2/AR/EFNA1/SMAD1/FZD2/SLITRK6/PBX1/PTCH1/IFT140/MBP/LDB1	65
GO:0048568	GO:0048568	embryonic organ development	51/975	309/12280	3.83129e-07	9.67952e-05	7.89437e-05	DVL2/MKS1/CC2D2A/FOXC1/TULP3/MYO15A/TGFB2/FGF9/NDRG4/WNT2/HOXA2/HOXA5/HOXA6/GLI3/TGFBR1/GATA3/GLI1/RIPOR2/BMP5/HOXA7/TWIST1/RUNX2/BMP4/SIX1/RNF112/SMO/ALDH1A2/CDKN1C/PDGFRA/SETDB2/HLX/HS6ST1/FOXF2/IFT172/LRIG3/VASH2/OSR1/ADM/KIT/PKDCC/HAND2/CITED2/OSR2/SMAD3/ROR2/EFNA1/FZD2/SLITRK6/PBX1/PTCH1/IFT140	51
GO:0035107	GO:0035107	appendage morphogenesis	26/975	111/12280	3.95209e-07	9.67952e-05	7.89437e-05	CYP26B1/MKS1/PITX1/TULP3/TBX5/TGFB2/FGF9/GLI3/MSX2/TBX4/TWIST1/RUNX2/BMP4/GDF5/ALDH1A2/OSR1/TBC1D32/RSPO2/BCL2L11/PKDCC/HAND2/OSR2/ROR2/PBX1/PTCH1/IFT140	26
GO:0035108	GO:0035108	limb morphogenesis	26/975	111/12280	3.95209e-07	9.67952e-05	7.89437e-05	CYP26B1/MKS1/PITX1/TULP3/TBX5/TGFB2/FGF9/GLI3/MSX2/TBX4/TWIST1/RUNX2/BMP4/GDF5/ALDH1A2/OSR1/TBC1D32/RSPO2/BCL2L11/PKDCC/HAND2/OSR2/ROR2/PBX1/PTCH1/IFT140	26
GO:1901342	GO:1901342	regulation of vasculature development	44/975	250/12280	3.95938e-07	9.67952e-05	7.89437e-05	CX3CL1/E2F2/HGF/C6/FOXC1/TGFB2/FGF9/RGCC/ITGB8/HOXA5/TSPAN12/C5/GAB1/SASH1/THBS4/STAT1/NFE2L2/CTH/TWIST1/BMP4/ADM2/PPARG/MAP2K5/CYP1B1/GATA6/VASH2/EFNA3/PLK2/ADM/PDCD4/HHEX/KIT/ADAMTS9/TLR3/GPER1/VEGFD/EFNA1/SMAD1/C3AR1/CCL11/JUP/CD34/PRKD1/MIR503	44
GO:0007423	GO:0007423	sensory organ development	58/975	371/12280	4.05935e-07	9.67952e-05	7.89437e-05	CYP26B1/DVL2/MKS1/CC2D2A/FOXC1/CDON/TULP3/MYO15A/TGFB2/FGF9/WNT2/HOXA2/TSPAN12/GLI3/TGFBR1/GATA3/CDKN1B/RIPOR2/BMP5/PLPPR4/TWIST1/BMP4/BFSP1/SIX1/FOXP2/ALDH1A2/CDKN1C/PDGFRA/FOXF2/CYP1B1/LRIG3/OSR1/TBC1D32/SHROOM2/SLC7A11/BCL2L11/MERTK/SLC25A27/KIT/ARHGAP35/CPAMD8/HAND2/OSR2/SALL2/SMAD3/ROR2/BCL2/BNC2/FZD4/SIX5/MAF/FZD2/LRTOMT/SLITRK6/ROR1/MITF/IFT140/NR2E3	58
GO:0060485	GO:0060485	mesenchyme development	39/975	211/12280	5.00471e-07	0.000113655	9.26938e-05	HGF/CUL7/FOXC1/ERBB3/TGFBR3/TBX5/TGFB2/BAMBI/FGF9/RGCC/WNT2/HOXA5/TGFBR1/BMP5/STAT1/MSX2/TWIST1/BMP4/SIX1/SMO/ALDH1A2/FOXA1/HTR2B/FOXF2/SEMA6C/OSR1/PDCD4/DAB2/SEMA3D/SPRY1/HAND2/CITED2/SMAD3/AXIN2/EFNA1/NRTN/BCL2/BNC2/SEMA4D	39
GO:1901617	GO:1901617	organic hydroxy compound biosynthetic process	35/975	180/12280	5.55318e-07	0.00011737	9.57237e-05	CFTR/MSMO1/IDI1/SREBF1/ACACB/FDFT1/TGFB2/SCD/PCK2/SQLE/GATA3/SC5D/MVK/BMP5/HMGCS1/HMGCR/NR1D1/HSD17B7/PSAT1/ITPKA/LHCGR/CH25H/IMPA2/ITPKB/CYP39A1/SLC7A11/LSS/IP6K3/HAND2/GPER1/MVD/ACOX2/FAXDC2/GPR37/MALRD1	35
GO:0003007	GO:0003007	heart morphogenesis	36/975	188/12280	5.66052e-07	0.00011737	9.57237e-05	DVL2/MKS1/FOXC1/TGFBR3/TBX5/TGFB2/NDRG4/WNT2/TGFBR1/GATA3/BMP5/MSX2/TWIST1/OBSL1/BMP4/SIX1/SMO/ALDH1A2/HTR2B/SETDB2/PIM1/IFT172/GATA6/PDCD4/SAV1/DHRS3/SPRY1/HAND2/CITED2/SMAD3/AXIN2/EFNA1/INSR/HEG1/FZD2/PTCH1	36
GO:0071496	GO:0071496	cellular response to external stimulus	46/975	271/12280	6.33631e-07	0.000125908	0.000102687	PDK4/PDK2/FYN/ATP1A2/ASNS/SREBF1/SESN1/CADPS2/P2RX7/MAP3K1/MTMR3/SLC1A2/RIPOR2/NFE2L2/SLC2A1/IRF1/ATF4/PPARG/PIK3C2B/SLC38A2/PIM1/CASP1/TP53/SKP2/CDKN2B/SESN3/PIEZO2/KCNB1/ARHGAP35/CBS/ATF3/IFI16/TLR3/BMT2/ZFYVE1/MARS/ADORA2B/BCL2/UCP2/NIM1K/PRKD1/LRRK2/MAP3K5/CASTOR1/CASTOR3/CASTOR2	46
GO:0031668	GO:0031668	cellular response to extracellular stimulus	39/975	214/12280	7.27548e-07	0.000138787	0.000113191	PDK4/PDK2/FYN/ASNS/SREBF1/SESN1/CADPS2/P2RX7/MTMR3/SLC1A2/NFE2L2/SLC2A1/ATF4/PPARG/PIK3C2B/SLC38A2/PIM1/TP53/SKP2/CDKN2B/SESN3/KCNB1/ARHGAP35/CBS/ATF3/IFI16/BMT2/ZFYVE1/MARS/ADORA2B/BCL2/UCP2/NIM1K/PRKD1/LRRK2/MAP3K5/CASTOR1/CASTOR3/CASTOR2	39
GO:0030278	GO:0030278	regulation of ossification	30/975	145/12280	9.12909e-07	0.000167449	0.000136567	HGF/P2RX7/TGFB2/RASSF2/HOXA2/GLI3/GLI1/MSX2/TWIST1/RUNX2/BMP4/JUND/OSR1/IL6R/DHRS3/PKDCC/CCR1/HAND2/OSR2/SMAD3/AXIN2/SMAD1/BCL2/FAM20C/PRKD1/PBX1/PTCH1/SEMA4D/NBR1/GDF10	30
GO:1901861	GO:1901861	regulation of muscle tissue development	25/975	109/12280	1.00326e-06	0.000177205	0.000144524	CYP26B1/CDON/ERBB3/TGFBR3/TBX5/FGF9/WNT2/TGFBR1/PPARGC1A/SOX6/GLI1/HMGCR/RGS2/TWIST1/BMP4/SIX1/PIM1/MSTN/GATA6/AKAP6/SAV1/FZD7/SMAD3/BCL2/NR1D2	25
GO:0043410	GO:0043410	positive regulation of MAPK cascade	58/975	384/12280	1.29004e-06	0.000219721	0.000179199	DVL2/CX3CL1/MAPK8IP2/HGF/MUSK/CDON/ERBB3/P2RX7/TGFB2/MAP3K1/RASSF2/MID1/FGF9/NDRG4/EPHB6/TGFBR1/C5/MAP2K6/SASH1/HMGCR/BMP4/TNFRSF19/TRIM5/PDGFRA/EPHA7/HTR2B/ARRB1/MAP2K5/PLCE1/PDE5A/PELI2/GAREM1/MERTK/ANGPT1/FZD7/GDF6/KIT/CCR1/HAND2/TLR3/GPER1/ROR2/AR/EFNA1/ADRA1B/ADORA2B/GPR37/INSR/CCL11/TLR6/FZD4/EPHB3/ROR1/CARD9/LRRK2/MAP3K5/LPAR1/SAMD5	58
GO:0048736	GO:0048736	appendage development	28/975	133/12280	1.45516e-06	0.000231321	0.00018866	CYP26B1/MKS1/PITX1/TULP3/TBX5/TGFB2/FGF9/GLI3/MSX2/TBX4/TWIST1/RUNX2/BMP4/GDF5/ALDH1A2/IFT172/OSR1/TBC1D32/RSPO2/SLC7A11/BCL2L11/PKDCC/HAND2/OSR2/ROR2/PBX1/PTCH1/IFT140	28
GO:0060173	GO:0060173	limb development	28/975	133/12280	1.45516e-06	0.000231321	0.00018866	CYP26B1/MKS1/PITX1/TULP3/TBX5/TGFB2/FGF9/GLI3/MSX2/TBX4/TWIST1/RUNX2/BMP4/GDF5/ALDH1A2/IFT172/OSR1/TBC1D32/RSPO2/SLC7A11/BCL2L11/PKDCC/HAND2/OSR2/ROR2/PBX1/PTCH1/IFT140	28
GO:0048762	GO:0048762	mesenchymal cell differentiation	33/975	172/12280	1.59079e-06	0.000244725	0.000199591	HGF/CUL7/FOXC1/TGFBR3/TBX5/TGFB2/BAMBI/RGCC/WNT2/TGFBR1/BMP5/STAT1/MSX2/TWIST1/BMP4/SMO/ALDH1A2/FOXA1/HTR2B/FOXF2/SEMA6C/OSR1/PDCD4/DAB2/SEMA3D/SPRY1/HAND2/SMAD3/AXIN2/EFNA1/NRTN/BCL2/SEMA4D	33
GO:0060038	GO:0060038	cardiac muscle cell proliferation	14/975	41/12280	1.65986e-06	0.000246112	0.000200722	FOXC1/TGFBR3/TBX5/TGFB2/FGF9/NDRG4/WNT2/TGFBR1/GLI1/PIM1/GATA6/TENM4/SAV1/SMAD1	14
GO:0035265	GO:0035265	organ growth	28/975	134/12280	1.70302e-06	0.000246112	0.000200722	FOXC1/TGFBR3/ACACB/TBX5/TGFB2/FGF9/NDRG4/WNT2/TGFBR1/GLI1/RGS2/MSX2/COL21A1/SMO/HLX/PIM1/GATA6/RSPO2/TENM4/AKAP6/SAV1/BCL2L11/AR/SMAD1/BCL2/BNC2/HEG1/PLAG1	28
GO:0055123	GO:0055123	digestive system development	23/975	99/12280	2.13147e-06	0.00029897	0.000243832	TGFB2/FGF9/HOXA5/GLI3/GLI1/BMP4/SMO/ALDH1A2/CDKN1C/PDGFRA/HLX/FOXF2/IFT172/GATA6/SAV1/KIT/PKDCC/SMAD3/COL3A1/INSR/BCL2/EPHB3/LGR4	23
GO:0016202	GO:0016202	regulation of striated muscle tissue development	24/975	107/12280	2.51007e-06	0.000342015	0.000278939	CYP26B1/CDON/ERBB3/TGFBR3/TBX5/FGF9/WNT2/TGFBR1/SOX6/GLI1/HMGCR/RGS2/TWIST1/BMP4/SIX1/PIM1/MSTN/GATA6/AKAP6/SAV1/FZD7/SMAD3/BCL2/NR1D2	24
GO:0048634	GO:0048634	regulation of muscle organ development	24/975	108/12280	2.98866e-06	0.000395915	0.000322898	CYP26B1/CDON/ERBB3/TGFBR3/TBX5/FGF9/WNT2/TGFBR1/SOX6/GLI1/HMGCR/RGS2/TWIST1/BMP4/SIX1/PIM1/MSTN/GATA6/AKAP6/SAV1/FZD7/SMAD3/BCL2/NR1D2	24
GO:0009612	GO:0009612	response to mechanical stimulus	30/975	154/12280	3.39746e-06	0.000437904	0.000357144	FYN/CLCN6/ATP1A2/ASNS/P2RX7/MAP3K1/TRPA1/RIPOR2/STAT1/SLC2A1/PPL/IRF1/GDF5/FOXP2/JUND/PPARG/SLC38A2/CASP1/USP53/PSPH/PIEZO2/KIT/BTG2/TLR3/PKD1L2/COL3A1/JUP/SLITRK6/PTCH1/TXNIP	30
GO:0060419	GO:0060419	heart growth	18/975	68/12280	3.78294e-06	0.000466733	0.000380655	FOXC1/TGFBR3/ACACB/TBX5/TGFB2/FGF9/NDRG4/WNT2/TGFBR1/GLI1/RGS2/PIM1/GATA6/TENM4/AKAP6/SAV1/SMAD1/HEG1	18
GO:0001708	GO:0001708	cell fate specification	13/975	38/12280	3.81685e-06	0.000466733	0.000380655	CDON/GLI3/SOX6/APC2/SIX1/SMO/FOXA1/TENM4/FZD7/ISL2/AR/PTCH1/MIAT	13
GO:0009991	GO:0009991	response to extracellular stimulus	56/975	379/12280	3.92911e-06	0.000468449	0.000382055	CYP26B1/PDK4/PDK2/FYN/ASNS/SREBF1/ACACB/SESN1/CADPS2/P2RX7/MTMR3/PCK2/PPARGC1A/SLC1A2/HMGCS1/HMGCR/STC2/STAT1/NFE2L2/SLC2A1/BBS2/ATF4/ALDH1A2/LDLR/PPARG/PIK3C2B/SLC38A2/PIM1/TP53/SKP2/PSPH/CDKN2B/ADM/SESN3/KCNB1/ARHGAP35/CBS/OMA1/VCAM1/ATF3/IFI16/BMT2/ZFYVE1/TMEM135/MARS/ADORA2B/BCL2/DDIT3/UCP2/NIM1K/PRKD1/LRRK2/MAP3K5/CASTOR1/CASTOR3/CASTOR2	56
GO:0035270	GO:0035270	endocrine system development	20/975	82/12280	4.40486e-06	0.000499836	0.000407653	PITX1/HOXA5/TGFBR1/GATA3/GLI1/BMP5/BMP4/SIX1/SMO/ALDH1A2/CDKN1C/PDGFRA/GATA6/ARID5B/IL6R/HESX1/CITED2/SMAD3/INSR/PBX1	20
GO:0048608	GO:0048608	reproductive structure development	50/975	326/12280	4.48814e-06	0.000499836	0.000407653	ARID4A/CUL7/FOXC1/TGFB2/DMC1/FGF9/ITGB8/WNT2/LFNG/GLI3/TGFBR1/GATA3/GLI1/CDKN1B/BMP5/HMGCS1/STC2/LHX4/TNFSF10/BMP4/FOXA1/CDKN1C/PPARG/PDGFRA/HS6ST1/FOXF2/ARRB1/LHCGR/IDH1/GATA6/VASH2/OSR1/ADM/ARID5B/BCL2L11/MERTK/KIT/HMGB2/RHOBTB3/TLR3/CITED2/ROR2/AR/INSR/BCL2/STOX2/FZD4/PLAG1/PTCH1/LGR4	50
GO:0048706	GO:0048706	embryonic skeletal system development	21/975	89/12280	4.5068e-06	0.000499836	0.000407653	MKS1/MBTD1/TULP3/FGF9/HOXA2/HOXA5/HOXA6/GLI3/TGFBR1/KIAA1217/HOXA7/TWIST1/RUNX2/BMP4/SIX1/PDGFRA/OSR1/OSR2/SMAD3/PBX1/IFT140	21
GO:0009952	GO:0009952	anterior/posterior pattern specification	27/975	133/12280	4.63106e-06	0.000501944	0.000409372	HOXC8/FOXC1/CDON/TULP3/WNT2/HOXA2/LFNG/HOXA5/HOXA6/GLI3/TGFBR1/MSX2/HOXA7/BHLHE41/BMP4/SMO/ALDH1A2/OSR1/HHEX/BTG2/SMAD3/AXIN2/ROR2/MLLT3/DDIT3/PBX1/LDB1	27
GO:0001501	GO:0001501	skeletal system development	56/975	382/12280	5.01462e-06	0.000531438	0.000433427	CYP26B1/MKS1/MBTD1/HOXC8/FOXC1/PITX1/TULP3/P2RX7/TGFB2/RASSF2/FGF9/ITGB8/HOXA2/HOXA5/HOXA6/GLI3/TGFBR1/SOX6/BMP5/BBX/MSX2/KIAA1217/TBX4/HOXA7/TWIST1/COL21A1/RUNX2/BBS2/BMP4/GDF5/SIX1/CDKN1C/SOX5/PDGFRA/IFT172/OSR1/RSPO2/NFIB/ARID5B/GDF6/KIT/DHRS3/PKDCC/HAND2/OSR2/SMAD3/COL3A1/AXIN2/ROR2/SMAD1/FAM20C/MAF/PBX1/IFT140/SEMA4D/GDF10	56
GO:0048565	GO:0048565	digestive tract development	21/975	90/12280	5.44577e-06	0.000564584	0.00046046	TGFB2/FGF9/HOXA5/GLI3/GLI1/BMP4/SMO/ALDH1A2/PDGFRA/HLX/FOXF2/IFT172/GATA6/SAV1/KIT/PKDCC/SMAD3/COL3A1/BCL2/EPHB3/LGR4	21
GO:0061458	GO:0061458	reproductive system development	50/975	329/12280	5.83998e-06	0.000592572	0.000483286	ARID4A/CUL7/FOXC1/TGFB2/DMC1/FGF9/ITGB8/WNT2/LFNG/GLI3/TGFBR1/GATA3/GLI1/CDKN1B/BMP5/HMGCS1/STC2/LHX4/TNFSF10/BMP4/FOXA1/CDKN1C/PPARG/PDGFRA/HS6ST1/FOXF2/ARRB1/LHCGR/IDH1/GATA6/VASH2/OSR1/ADM/ARID5B/BCL2L11/MERTK/KIT/HMGB2/RHOBTB3/TLR3/CITED2/ROR2/AR/INSR/BCL2/STOX2/FZD4/PLAG1/PTCH1/LGR4	50
GO:0031669	GO:0031669	cellular response to nutrient levels	34/975	191/12280	6.32914e-06	0.000628826	0.000512855	PDK4/PDK2/FYN/ASNS/SREBF1/SESN1/CADPS2/P2RX7/MTMR3/NFE2L2/SLC2A1/ATF4/PPARG/PIK3C2B/SLC38A2/PIM1/TP53/CDKN2B/SESN3/KCNB1/ATF3/IFI16/BMT2/ZFYVE1/MARS/BCL2/UCP2/NIM1K/PRKD1/LRRK2/MAP3K5/CASTOR1/CASTOR3/CASTOR2	34
GO:0055017	GO:0055017	cardiac muscle tissue growth	17/975	64/12280	6.65865e-06	0.000648063	0.000528544	FOXC1/TGFBR3/TBX5/TGFB2/FGF9/NDRG4/WNT2/TGFBR1/GLI1/RGS2/PIM1/GATA6/TENM4/AKAP6/SAV1/SMAD1/HEG1	17
GO:0007187	GO:0007187	G protein-coupled receptor signaling pathway, coupled to cyclic nucleotide second messenger	24/975	113/12280	6.8852e-06	0.000656711	0.000535596	CALCRL/GNAO1/ARRDC3/RGS2/OPRL1/ADM2/HTR2B/LHCGR/GPR65/ADM/GPR78/GNA14/CCR1/GPER1/ADRA1B/ADORA2B/GPR37/CHRM2/PTGDR2/DRD1/GNG2/LPAR1/GRK5/LGR4	24
GO:0006066	GO:0006066	alcohol metabolic process	42/975	260/12280	7.08519e-06	0.000662535	0.000540347	CFTR/MSMO1/IDI1/ALDH3A2/SREBF1/ACACB/FDFT1/SCD/PCK2/SQLE/SC5D/MVK/BMP5/HMGCS1/HMGCR/PLCD4/APOL2/ALDH1A2/LDLR/ACSS2/HSD17B7/ITPKA/LHCGR/CYP1B1/CH25H/PLCE1/IMPA2/ITPKB/CYP39A1/VLDLR/ACSS1/LSS/IP6K3/DHRS3/GPER1/LIPC/MVD/INPP5D/INPP5J/ADH1B/SULT1C4/INPP5B	42
GO:0043583	GO:0043583	ear development	28/975	144/12280	7.41373e-06	0.000670695	0.000547002	DVL2/MKS1/MYO15A/TGFB2/FGF9/HOXA2/GLI3/GATA3/CDKN1B/RIPOR2/BMP5/PLPPR4/TWIST1/BMP4/SIX1/LRIG3/OSR1/SHROOM2/BCL2L11/SLC25A27/OSR2/ROR2/BCL2/MAF/FZD2/LRTOMT/SLITRK6/ROR1	28
GO:0045765	GO:0045765	regulation of angiogenesis	38/975	226/12280	7.45373e-06	0.000670695	0.000547002	CX3CL1/E2F2/HGF/C6/FOXC1/TGFB2/RGCC/ITGB8/HOXA5/TSPAN12/C5/GAB1/SASH1/THBS4/STAT1/NFE2L2/TWIST1/ADM2/PPARG/MAP2K5/CYP1B1/GATA6/VASH2/EFNA3/PLK2/ADM/HHEX/ADAMTS9/TLR3/VEGFD/EFNA1/SMAD1/C3AR1/CCL11/JUP/CD34/PRKD1/MIR503	38
GO:0042476	GO:0042476	odontogenesis	20/975	85/12280	7.92228e-06	0.000699654	0.00057062	FOXC1/GNAO1/TGFB2/GLI3/MSX2/TWIST1/RUNX2/BMP4/SMO/PDGFRA/OSR1/RSPO2/ADM/BCL2L11/ADAMTS5/HAND2/OSR2/AXIN2/CD34/FAM20C	20
GO:0003013	GO:0003013	circulatory system process	49/975	325/12280	9.03345e-06	0.000783282	0.000638825	FYN/ATP1A2/NEDD4L/FOXC1/KCNH2/GUCY1B1/SREBF1/KCNN2/GNAO1/TGFB2/MAP2K6/HMGCR/STAT1/RGS2/BBS2/OPRL1/ADM2/PPARG/HTR2B/PDE5A/MYLK3/ANK2/ADM/SCN2B/ITPR1/PTPRO/KCNE4/ANGPT1/ARHGAP35/GUCY1A1/GPER1/SMAD3/OR51E2/BDKRB2/AR/ADRA1B/ADORA2B/KCND3/C3AR1/HEG1/JUP/CD34/KCNE3/KCNG2/CHRM2/PLA2G6/PTP4A3/DRD1/TBC1D8	49
GO:0061061	GO:0061061	muscle structure development	65/975	475/12280	9.25241e-06	0.000787942	0.000642625	CYP26B1/FOXC1/PRDM6/CDON/ERBB3/PITX1/TGFBR3/SPEG/TBX5/TGFB2/NFATC4/FGF9/DYRK1B/WNT2/TGFBR1/SOX6/GLI1/RIPOR2/HMGCR/TANC1/RGS2/CTH/TWIST1/BHLHE41/OBSL1/MED20/BMP4/SIX1/FOXP2/SMO/FHOD3/PDGFRA/HLX/PIM1/MSTN/MYLK3/GATA6/BOC/ANK2/ADM/MKX/CTF1/ARID5B/PDCD4/AKAP6/SAV1/FZD7/KIT/BTG2/ATF3/LMOD1/SAP30/GPER1/SMAD3/COL3A1/BCL2/CHD2/HEG1/NR1D2/DDIT3/MAMSTR/PLEKHM3/FZD2/SVIL/MAP3K5	65
GO:0042594	GO:0042594	response to starvation	29/975	155/12280	1.12053e-05	0.000924155	0.000753717	PDK4/ASNS/SREBF1/SESN1/CADPS2/MTMR3/PCK2/PPARGC1A/NFE2L2/SLC2A1/ATF4/PPARG/PIK3C2B/SLC38A2/TP53/ADM/SESN3/ATF3/IFI16/BMT2/ZFYVE1/MARS/BCL2/DDIT3/UCP2/NIM1K/PRKD1/LRRK2/MAP3K5	29
GO:0045667	GO:0045667	regulation of osteoblast differentiation	21/975	94/12280	1.12395e-05	0.000924155	0.000753717	HGF/RASSF2/HOXA2/GLI3/GLI1/MSX2/TWIST1/RUNX2/BMP4/JUND/IL6R/HAND2/SMAD3/AXIN2/SMAD1/FAM20C/PRKD1/PTCH1/SEMA4D/NBR1/GDF10	21
GO:0007548	GO:0007548	sex differentiation	34/975	197/12280	1.26077e-05	0.0010021	0.000817286	ARID4A/FOXC1/TGFB2/DMC1/FGF9/LFNG/TGFBR1/GATA3/BMP5/HMGCS1/TNFSF10/PDGFRA/FOXF2/ARRB1/LHCGR/IDH1/GATA6/OSR1/ARID5B/BCL2L11/MERTK/KIT/HMGB2/RHOBTB3/TLR3/CITED2/ROR2/AR/INSR/BCL2/FZD4/PBX1/LGR4/DACH1	34
GO:0048562	GO:0048562	embryonic organ morphogenesis	34/975	197/12280	1.26077e-05	0.0010021	0.000817286	DVL2/TULP3/MYO15A/FGF9/NDRG4/HOXA2/HOXA5/HOXA6/GLI3/TGFBR1/GATA3/GLI1/RIPOR2/HOXA7/TWIST1/RUNX2/BMP4/SIX1/SMO/PDGFRA/SETDB2/HLX/FOXF2/IFT172/LRIG3/OSR1/HAND2/OSR2/SMAD3/ROR2/EFNA1/FZD2/SLITRK6/IFT140	34
GO:0003006	GO:0003006	developmental process involved in reproduction	64/975	471/12280	1.36143e-05	0.00106437	0.000868072	CFTR/ARID4A/CUL7/FOXC1/MOV10L1/TGFB2/DMC1/TTLL1/FGF9/ITGB8/WNT2/LFNG/GLI3/TGFBR1/GATA3/GLI1/CDKN1B/BMP5/HMGCS1/STC2/PCSK4/LHX4/TNFSF10/BBS2/BMP4/FOXA1/CDKN1C/PPARG/PDGFRA/HS6ST1/FOXF2/ARRB1/LHCGR/IDH1/PDE5A/GATA6/ZMYND15/VASH2/OSR1/ADM/ARID5B/BCL2L11/MERTK/KIT/NPM2/HMGB2/RHOBTB3/TLR3/CITED2/ROR2/AR/PAQR8/INSR/BCL2/STOX2/FZD4/SIX5/PLAG1/PBX1/PTCH1/LGR4/CFAP44/ETV5/DACH1	64
GO:0007517	GO:0007517	muscle organ development	45/975	294/12280	1.41303e-05	0.00108646	0.000886088	CYP26B1/FOXC1/CDON/ERBB3/PITX1/TGFBR3/SPEG/TBX5/TGFB2/FGF9/WNT2/TGFBR1/SOX6/GLI1/RIPOR2/HMGCR/RGS2/TWIST1/OBSL1/MED20/BMP4/SIX1/FOXP2/SMO/HLX/PIM1/MSTN/GATA6/MKX/CTF1/ARID5B/AKAP6/SAV1/FZD7/BTG2/ATF3/SAP30/SMAD3/COL3A1/BCL2/CHD2/HEG1/NR1D2/FZD2/SVIL	45
GO:2000826	GO:2000826	regulation of heart morphogenesis	11/975	31/12280	1.43525e-05	0.00108646	0.000886088	MKS1/FOXC1/TBX5/TGFB2/TGFBR1/TWIST1/BMP4/SIX1/SMO/PIM1/HAND2	11
GO:0003156	GO:0003156	regulation of animal organ formation	10/975	26/12280	1.55498e-05	0.00115871	0.000945011	MKS1/TBX5/WNT2/BMP4/SIX1/PIM1/SPRY1/HAND2/CITED2/AR	10
GO:0016126	GO:0016126	sterol biosynthetic process	17/975	68/12280	1.60254e-05	0.00117577	0.000958927	CFTR/MSMO1/IDI1/SREBF1/ACACB/FDFT1/SCD/SQLE/SC5D/MVK/HMGCS1/HMGCR/HSD17B7/CH25H/LSS/MVD/FAXDC2	17
GO:0048732	GO:0048732	gland development	47/975	314/12280	1.6633e-05	0.00120186	0.000980205	HGF/FOXC1/PITX1/TGFBR3/ASNS/NTN4/TGFB2/PCK2/DBP/WNT2/HOXA5/GLI3/TGFBR1/GATA3/GLI1/CDKN1B/OAS2/HMGCS1/MSX2/BMP4/SIX1/SMO/ALDH1A2/FOXA1/CDKN1C/PDGFRA/HLX/GATA6/NFIB/ARID5B/BCL2L11/CEBPG/ARHGAP35/HESX1/HAND2/CITED2/SMAD3/AR/INSR/BCL2/CCL11/UCP2/PLAG1/EPHB3/PBX1/PTCH1/ETV5	47
GO:0007188	GO:0007188	adenylate cyclase-modulating G protein-coupled receptor signaling pathway	22/975	104/12280	1.76036e-05	0.00124834	0.00101811	CALCRL/GNAO1/ARRDC3/RGS2/OPRL1/ADM2/LHCGR/GPR65/ADM/GPR78/GNA14/GPER1/ADRA1B/ADORA2B/GPR37/CHRM2/PTGDR2/DRD1/GNG2/LPAR1/GRK5/LGR4	22
GO:0001655	GO:0001655	urogenital system development	40/975	252/12280	1.77998e-05	0.00124834	0.00101811	CYP26B1/FOXC1/TGFB2/GLI3/TGFBR1/GATA3/GLI1/CDKN1B/STAT1/BMP4/SIX1/SMO/ALDH1A2/FOXA1/CDKN1C/PDGFRA/EPHA7/PLCE1/OSR1/ARID5B/PTPRO/BCL2L11/ANGPT1/NFIA/KLF15/SPRY1/OSR2/SMAD3/AR/SMAD1/BCL2/CD34/GCNT4/PLAG1/EPHB3/PBX1/PTCH1/IFT140/LRRK2/LGR4	40
GO:0016125	GO:0016125	sterol metabolic process	24/975	120/12280	2.0089e-05	0.00138847	0.0011324	CFTR/CYP26B1/MSMO1/IDI1/SREBF1/ACACB/FDFT1/SCD/SQLE/SC5D/MVK/HMGCS1/HMGCR/APOL2/LDLR/HSD17B7/CYP1B1/CH25H/CYP39A1/VLDLR/LSS/LIPC/MVD/FAXDC2	24
GO:0002683	GO:0002683	negative regulation of immune system process	45/975	299/12280	2.18046e-05	0.00148484	0.001211	CX3CL1/NR1H3/CD200/TGFB2/JAK3/HOXA5/GLI3/C5/AMBP/DHX58/RIPOR2/BMP5/NFE2L2/HOXA7/NMI/IRF1/BMP4/NR1D1/LDLR/PPARG/HLX/PDE5A/ITPKB/TMEM178A/MERTK/CD96/ANGPT1/TNFRSF14/IFI16/TLR3/GPER1/COL3A1/INPP5D/SERPINB9/PARP14/TLR6/IL20RB/SOCS1/IFIT1/LDB1/LGR4/MMP28/HIST1H4K/HIST1H4I/RAB7B	45
GO:0050680	GO:0050680	negative regulation of epithelial cell proliferation	21/975	98/12280	2.21061e-05	0.00148484	0.001211	TGFBR3/TGFB2/IFT74/RGCC/TGFBR1/GATA3/CDKN1B/STAT1/KLF9/BMP4/GDF5/CDKN1C/PPARG/IFT172/NFIB/CDKN2B/SAV1/AR/MCC/PTCH1/MIR503	21
GO:0048589	GO:0048589	developmental growth	66/975	498/12280	2.25172e-05	0.00149145	0.00121639	MUSK/NEDD4L/FOXC1/TGFBR3/TRPC5/ACACB/TBX5/DPYSL2/TGFB2/HDAC6/FGF9/NDRG4/WNT2/HOXA5/GLI3/TGFBR1/GATA3/SLC1A2/GLI1/STC2/RGS2/MSX2/COL21A1/BBS2/BMP4/GDF5/FLRT1/SIX1/SMO/CDKN1C/EPHA7/HLX/PIM1/MSTN/GATA6/SEMA6C/PLAC8/RSPO2/ADM/TENM4/ARID5B/AKAP6/SAV1/BCL2L11/SEMA3D/FZD7/PKDCC/SPRY1/SMAD3/AR/SMAD1/INSR/BCL2/CCL11/BNC2/HEG1/GAS1/PLAG1/EFNA5/SLITRK6/PTCH1/MAPT/SLIT1/SEMA4D/MBD5/COLQ	66
GO:0031667	GO:0031667	response to nutrient levels	51/975	355/12280	2.31767e-05	0.0014951	0.00121937	CYP26B1/PDK4/PDK2/FYN/ASNS/SREBF1/ACACB/SESN1/CADPS2/P2RX7/MTMR3/PCK2/PPARGC1A/HMGCS1/HMGCR/STC2/STAT1/NFE2L2/SLC2A1/BBS2/ATF4/ALDH1A2/LDLR/PPARG/PIK3C2B/SLC38A2/PIM1/TP53/PSPH/CDKN2B/ADM/SESN3/KCNB1/OMA1/VCAM1/ATF3/IFI16/BMT2/ZFYVE1/TMEM135/MARS/BCL2/DDIT3/UCP2/NIM1K/PRKD1/LRRK2/MAP3K5/CASTOR1/CASTOR3/CASTOR2	51
GO:0008015	GO:0008015	blood circulation	47/975	318/12280	2.31993e-05	0.0014951	0.00121937	ATP1A2/NEDD4L/FOXC1/KCNH2/GUCY1B1/SREBF1/KCNN2/GNAO1/TGFB2/MAP2K6/HMGCR/STAT1/RGS2/BBS2/OPRL1/ADM2/PPARG/HTR2B/PDE5A/MYLK3/ANK2/ADM/SCN2B/ITPR1/PTPRO/KCNE4/ANGPT1/ARHGAP35/GUCY1A1/GPER1/SMAD3/OR51E2/BDKRB2/AR/ADRA1B/ADORA2B/KCND3/C3AR1/JUP/CD34/KCNE3/KCNG2/CHRM2/PLA2G6/PTP4A3/DRD1/TBC1D8	47
GO:0048738	GO:0048738	cardiac muscle tissue development	28/975	153/12280	2.41578e-05	0.00153612	0.00125282	FOXC1/ERBB3/TGFBR3/TBX5/TGFB2/FGF9/NDRG4/WNT2/TGFBR1/SOX6/GLI1/BMP5/RGS2/OBSL1/BMP4/ALDH1A2/FHOD3/PDGFRA/PIM1/MYLK3/GATA6/TENM4/AKAP6/SAV1/FZD7/ADAMTS9/SMAD1/HEG1	28
GO:1904018	GO:1904018	positive regulation of vasculature development	27/975	146/12280	2.76757e-05	0.00173665	0.00141637	CX3CL1/HGF/C6/ITGB8/C5/GAB1/SASH1/NFE2L2/CTH/TWIST1/ADM2/CYP1B1/GATA6/VASH2/PLK2/ADM/KIT/TLR3/GPER1/VEGFD/SMAD1/C3AR1/CCL11/JUP/CD34/PRKD1/MIR503	27
GO:0002088	GO:0002088	lens development in camera-type eye	14/975	51/12280	2.87292e-05	0.00177934	0.00145119	CDON/WNT2/TGFBR1/GATA3/BMP4/BFSP1/CDKN1C/TBC1D32/SHROOM2/SLC7A11/SMAD3/SIX5/MAF/SLITRK6	14
GO:1901863	GO:1901863	positive regulation of muscle tissue development	15/975	58/12280	3.25574e-05	0.00197547	0.00161114	CYP26B1/CDON/ERBB3/TGFBR3/TBX5/FGF9/WNT2/PPARGC1A/GLI1/HMGCR/BMP4/PIM1/GATA6/AKAP6/BCL2	15
GO:1905330	GO:1905330	regulation of morphogenesis of an epithelium	22/975	108/12280	3.27243e-05	0.00197547	0.00161114	DVL2/MKS1/HGF/NTN4/GPC4/PARD6A/WNT2/GATA3/STAT1/BMP4/SIX1/SMO/DAB2/FZD7/ROR2/AR/MLLT3/FZD4/FZD2/ROR1/LGR4/ETV5	22
GO:0061036	GO:0061036	positive regulation of cartilage development	10/975	28/12280	3.31728e-05	0.00197752	0.00161281	GLI3/SOX6/RUNX2/BMP4/GDF5/SOX5/GDF6/PKDCC/SMAD3/SMAD1	10
GO:0032675	GO:0032675	regulation of interleukin-6 production	18/975	79/12280	3.54649e-05	0.00206917	0.00168756	CX3CL1/HGF/P2RX7/CD200/IFIH1/TWIST1/ARRB1/TSLP/IL6R/TLR3/INPP5D/AFAP1L2/ADORA2B/TLR1/TLR6/CARD9/MBP/RAB7B	18
GO:0035137	GO:0035137	hindlimb morphogenesis	9/975	23/12280	3.55781e-05	0.00206917	0.00168756	PITX1/MSX2/TWIST1/BMP4/GDF5/OSR1/RSPO2/OSR2/PTCH1	9
GO:0006935	GO:0006935	chemotaxis	57/975	419/12280	3.89257e-05	0.00223658	0.0018241	CX3CL1/FYN/HGF/NTN4/PLD1/DPYSL2/TGFB2/HOXA2/GLI3/C5/GATA3/GAB1/RIPOR2/THBS4/LHX4/BMP4/SMO/MTUS1/PDGFRA/EPHA7/TUBB2B/CH25H/MSTN/SEMA6C/EFNA3/BOC/VLDLR/NFIB/PTPRO/SEMA3D/ANGPT1/KIF5A/KIT/ISL2/ARHGAP35/IL6R/VCAM1/CCR1/HMGB2/VEGFD/SMAD3/EFNA1/NRTN/C3AR1/CCL11/IL16/EPHB3/CAMK1D/PTGDR2/PRKD1/EFNA5/PLA2G6/PTCH1/SLIT1/SEMA4D/LPAR1/MMP28	57
GO:0050708	GO:0050708	regulation of protein secretion	43/975	288/12280	4.00982e-05	0.00227271	0.00185357	CFTR/CX3CL1/NR1H3/SREBF1/P2RX7/SIRT4/CD200/TGFB2/RGCC/C5/GATA3/EXPH5/HMGCR/IFIH1/SLC2A1/TWIST1/NR1D1/SNAP25/HTR2B/ARRB1/CASP1/SIRT3/TSLP/ITPR1/ANGPT1/RAB11FIP1/TNFRSF14/KCNB1/GPER1/OR51E2/IRS1/CD34/TLR1/TLR6/UCP2/KCNG2/EFNA5/PLA2G6/SOCS1/LRRK2/MBP/SCAMP5/LGR4	43
GO:0048638	GO:0048638	regulation of developmental growth	39/975	252/12280	4.05076e-05	0.00227271	0.00185357	MUSK/NEDD4L/FOXC1/TGFBR3/TRPC5/ACACB/TBX5/DPYSL2/FGF9/WNT2/TGFBR1/GLI1/STC2/RGS2/BBS2/BMP4/GDF5/SIX1/SMO/EPHA7/HLX/PIM1/MSTN/GATA6/SEMA6C/PLAC8/AKAP6/SAV1/BCL2L11/SEMA3D/AR/INSR/BCL2/EFNA5/PTCH1/MAPT/SEMA4D/MBD5/COLQ	39
GO:0048704	GO:0048704	embryonic skeletal system morphogenesis	16/975	66/12280	4.2634e-05	0.00236421	0.00192819	TULP3/HOXA2/HOXA5/HOXA6/GLI3/TGFBR1/HOXA7/TWIST1/RUNX2/BMP4/SIX1/PDGFRA/OSR1/OSR2/SMAD3/IFT140	16
GO:0001837	GO:0001837	epithelial to mesenchymal transition	22/975	110/12280	4.39895e-05	0.00241133	0.00196662	HGF/CUL7/FOXC1/TGFBR3/TBX5/TGFB2/BAMBI/RGCC/WNT2/TGFBR1/BMP5/MSX2/TWIST1/BMP4/FOXA1/FOXF2/PDCD4/DAB2/SPRY1/SMAD3/AXIN2/EFNA1	22
GO:0042330	GO:0042330	taxis	57/975	421/12280	4.45974e-05	0.00241688	0.00197114	CX3CL1/FYN/HGF/NTN4/PLD1/DPYSL2/TGFB2/HOXA2/GLI3/C5/GATA3/GAB1/RIPOR2/THBS4/LHX4/BMP4/SMO/MTUS1/PDGFRA/EPHA7/TUBB2B/CH25H/MSTN/SEMA6C/EFNA3/BOC/VLDLR/NFIB/PTPRO/SEMA3D/ANGPT1/KIF5A/KIT/ISL2/ARHGAP35/IL6R/VCAM1/CCR1/HMGB2/VEGFD/SMAD3/EFNA1/NRTN/C3AR1/CCL11/IL16/EPHB3/CAMK1D/PTGDR2/PRKD1/EFNA5/PLA2G6/PTCH1/SLIT1/SEMA4D/LPAR1/MMP28	57
GO:0009267	GO:0009267	cellular response to starvation	24/975	126/12280	4.64031e-05	0.00248648	0.00202791	PDK4/ASNS/SREBF1/SESN1/CADPS2/MTMR3/NFE2L2/SLC2A1/ATF4/PIK3C2B/SLC38A2/TP53/SESN3/ATF3/IFI16/BMT2/ZFYVE1/MARS/BCL2/UCP2/NIM1K/PRKD1/LRRK2/MAP3K5	24
GO:0001504	GO:0001504	neurotransmitter uptake	10/975	29/12280	4.70533e-05	0.0024933	0.00203347	ATP1A2/SLC1A2/SLC38A1/RGS2/GFAP/SNAP25/SLC7A11/SLC1A7/SLC29A2/DRD1	10
GO:0045778	GO:0045778	positive regulation of ossification	16/975	67/12280	5.1942e-05	0.00264761	0.00215932	HGF/P2RX7/TGFB2/GLI3/MSX2/RUNX2/BMP4/JUND/OSR1/IL6R/PKDCC/OSR2/SMAD3/SMAD1/FAM20C/PRKD1	16
GO:0006694	GO:0006694	steroid biosynthetic process	26/975	143/12280	5.23417e-05	0.00264761	0.00215932	CFTR/TSPOAP1/MSMO1/IDI1/SREBF1/ACACB/FDFT1/SCD/SQLE/PPARGC1A/SC5D/MVK/BMP5/HMGCS1/HMGCR/NR1D1/HSD17B7/CH25H/CYP39A1/ADM/LSS/MVD/ACOX2/FAXDC2/PBX1/MALRD1	26
GO:0032332	GO:0032332	positive regulation of chondrocyte differentiation	8/975	19/12280	5.24902e-05	0.00264761	0.00215932	GLI3/SOX6/RUNX2/GDF5/SOX5/GDF6/PKDCC/SMAD3	8
GO:0006084	GO:0006084	acetyl-CoA metabolic process	11/975	35/12280	5.2631e-05	0.00264761	0.00215932	PDK4/PDK2/ACACB/MVK/HMGCS1/ACSS2/NUDT7/TDO2/ACSS1/MVD/PIPOX	11
GO:0019932	GO:0019932	second-messenger-mediated signaling	39/975	255/12280	5.2956e-05	0.00264761	0.00215932	PDK2/ATP1A2/GUCY1B1/CALCRL/ERBB3/P2RX7/NFATC4/AHR/ARRDC3/RGS2/OPRL1/ADM2/HTR2B/LHCGR/PLCE1/PDE5A/GPR65/MCTP2/ANK2/ADM/ITPR1/AKAP6/GUCY1A2/GPR78/VCAM1/CCR1/GUCY1A1/GPER1/ADRA1B/ADORA2B/RCAN2/PTGDR2/DRD1/GNG2/MAPT/LRRK2/LPAR1/LGR4/PLA2G4B	39
GO:0032330	GO:0032330	regulation of chondrocyte differentiation	12/975	41/12280	5.32964e-05	0.00264761	0.00215932	GLI3/TGFBR1/SOX6/RUNX2/BMP4/GDF5/SOX5/GDF6/PKDCC/SMAD3/AXIN2/MAF	12
GO:0007610	GO:0007610	behavior	52/975	376/12280	5.46218e-05	0.00268548	0.0021902	ADAM22/MAPK8IP2/FYN/ATP1A2/MUSK/PER3/GNAO1/MYO15A/NDRG4/FBXL20/SLC1A2/HMGCR/THBS4/ARRDC3/TANC1/ATXN1/BBS2/OPRL1/ADM2/FOXP2/LDLR/SNAP25/HTR2B/NOVA1/NCOA2/TP53/PLK2/VLDLR/SLC7A11/KIT/CIART/BTG2/HAND2/CREBRF/SLITRK5/NLGN1/GPR37/INSR/BCL2/FZD4/GCNT4/GPR88/PLA2G6/KCND2/SLITRK6/DRD1/MAPT/LRRK2/DDO/MBD5/ETV5/DACH1	52
GO:0046661	GO:0046661	male sex differentiation	23/975	120/12280	5.99633e-05	0.00291068	0.00237388	ARID4A/TGFB2/FGF9/TGFBR1/GATA3/BMP5/HMGCS1/TNFSF10/PDGFRA/LHCGR/GATA6/ARID5B/BCL2L11/KIT/HMGB2/RHOBTB3/TLR3/CITED2/ROR2/AR/INSR/BCL2/LGR4	23
GO:0045766	GO:0045766	positive regulation of angiogenesis	24/975	128/12280	6.0423e-05	0.00291068	0.00237388	CX3CL1/HGF/C6/ITGB8/C5/GAB1/SASH1/NFE2L2/TWIST1/ADM2/CYP1B1/GATA6/VASH2/PLK2/ADM/TLR3/VEGFD/SMAD1/C3AR1/CCL11/JUP/CD34/PRKD1/MIR503	24
GO:1902930	GO:1902930	regulation of alcohol biosynthetic process	15/975	61/12280	6.16074e-05	0.00293806	0.0023962	IDI1/SREBF1/ACACB/FDFT1/SCD/SQLE/SC5D/MVK/BMP5/HMGCS1/HMGCR/LHCGR/LSS/GPER1/MVD	15
GO:0001508	GO:0001508	action potential	19/975	90/12280	6.66704e-05	0.00314803	0.00256745	ATP1A2/NEDD4L/KCNH2/KCNN2/SCN2A/SCN7A/ANK2/USP53/SCN2B/AKAP6/KCNE4/KCNB1/GPER1/KCND3/JUP/KCNE3/GPR88/KCND2/DRD1	19
GO:0045540	GO:0045540	regulation of cholesterol biosynthetic process	12/975	42/12280	6.92809e-05	0.00317693	0.00259102	IDI1/SREBF1/ACACB/FDFT1/SCD/SQLE/SC5D/MVK/HMGCS1/HMGCR/LSS/MVD	12
GO:0048645	GO:0048645	animal organ formation	12/975	42/12280	6.92809e-05	0.00317693	0.00259102	TBX5/WNT2/GLI3/BMP4/SIX1/PIM1/GATA6/SPRY1/HAND2/CITED2/AXIN2/AR	12
GO:0106118	GO:0106118	regulation of sterol biosynthetic process	12/975	42/12280	6.92809e-05	0.00317693	0.00259102	IDI1/SREBF1/ACACB/FDFT1/SCD/SQLE/SC5D/MVK/HMGCS1/HMGCR/LSS/MVD	12
GO:0032635	GO:0032635	interleukin-6 production	18/975	83/12280	7.10896e-05	0.00322882	0.00263334	CX3CL1/HGF/P2RX7/CD200/IFIH1/TWIST1/ARRB1/TSLP/IL6R/TLR3/INPP5D/AFAP1L2/ADORA2B/TLR1/TLR6/CARD9/MBP/RAB7B	18
GO:0002009	GO:0002009	morphogenesis of an epithelium	52/975	380/12280	7.23249e-05	0.00325227	0.00265247	DVL2/MKS1/HGF/CC2D2A/NTN4/GPC4/TULP3/TBX5/TGFB2/NFATC4/PARD6A/NDRG4/WNT2/HOXA5/GLI3/GATA3/BMP5/STAT1/MSX2/TBX4/TWIST1/BMP4/SIX1/SMO/ALDH1A2/FOXA1/EPHA7/SETDB2/FOXF2/IFT172/OSR1/RSPO2/ASTN2/ADM/DAB2/FZD7/ARHGAP35/SPRY1/HAND2/SMAD3/ROR2/AR/BCL2/MLLT3/CCL11/FZD4/FZD2/ROR1/PBX1/PTCH1/LGR4/ETV5	52
GO:0008202	GO:0008202	steroid metabolic process	34/975	214/12280	7.29699e-05	0.00325227	0.00265247	CFTR/CYP26B1/TSPOAP1/MSMO1/IDI1/SREBF1/ACACB/FDFT1/SCD/SQLE/PPARGC1A/SC5D/MVK/BMP5/HMGCS1/HMGCR/NR1D1/APOL2/LDLR/HSD17B7/PDGFRA/CYP1B1/CH25H/CYP39A1/VLDLR/ADM/KIT/LSS/LIPC/MVD/ACOX2/FAXDC2/PBX1/MALRD1	34
GO:0060021	GO:0060021	roof of mouth development	17/975	76/12280	7.44069e-05	0.00326848	0.00266569	TGFBR3/TGFB2/GLI3/TGFBR1/TWIST1/PDGFRA/FOXF2/IFT172/OSR1/ARID5B/DHRS3/PKDCC/HAND2/OSR2/BNC2/FZD2/EPHB3	17
GO:0006695	GO:0006695	cholesterol biosynthetic process	15/975	62/12280	7.53895e-05	0.00326848	0.00266569	CFTR/MSMO1/IDI1/SREBF1/ACACB/FDFT1/SCD/SQLE/SC5D/MVK/HMGCS1/HMGCR/HSD17B7/LSS/MVD	15
GO:0110110	GO:0110110	positive regulation of animal organ morphogenesis	15/975	62/12280	7.53895e-05	0.00326848	0.00266569	TGFB2/WNT2/TGFBR1/GATA3/TWIST1/BMP4/SIX1/FOXP2/SMO/PIM1/SPRY1/HAND2/AR/CD34/LGR4	15
GO:0110111	GO:0110111	negative regulation of animal organ morphogenesis	9/975	25/12280	7.69174e-05	0.00330468	0.00269521	FOXC1/TGFB2/GATA3/STAT1/BMP4/SIX1/RSPO2/NFIB/BCL2	9
GO:1904888	GO:1904888	cranial skeletal system development	13/975	49/12280	8.13929e-05	0.00344755	0.00281173	TULP3/TGFB2/HOXA2/GLI3/TGFBR1/MSX2/TWIST1/RUNX2/BMP4/SIX1/PDGFRA/SMAD3/IFT140	13
GO:0048863	GO:0048863	stem cell differentiation	27/975	155/12280	8.16886e-05	0.00344755	0.00281173	FOXC1/TBX5/TGFB2/GATA3/SOX6/NFE2L2/MSX2/HOXA7/TWIST1/RUNX2/BMP4/SMO/ALDH1A2/FOXA1/SOX5/PDGFRA/HTR2B/GATA6/SEMA6C/OSR1/ZFP36L2/SEMA3D/KIT/HAND2/NRTN/SEMA4D/LDB1	27
GO:0071346	GO:0071346	cellular response to interferon-gamma	22/975	115/12280	8.86965e-05	0.00371047	0.00302616	CX3CL1/NR1H3/MID1/OAS2/STAT1/NMI/IRF1/PPARG/TRIM5/CASP1/PARP9/RAB20/ADAMTS13/GBP4/VCAM1/TLR3/IRF2/CCL11/PARP14/SOCS1/DAPK1/RAB7B	22
GO:1902653	GO:1902653	secondary alcohol biosynthetic process	15/975	63/12280	9.17927e-05	0.0038066	0.00310457	CFTR/MSMO1/IDI1/SREBF1/ACACB/FDFT1/SCD/SQLE/SC5D/MVK/HMGCS1/HMGCR/HSD17B7/LSS/MVD	15
GO:0061448	GO:0061448	connective tissue development	33/975	208/12280	9.53073e-05	0.00391828	0.00319565	PITX1/FGF9/DYRK1B/ITGB8/HOXA5/GLI3/TGFBR1/PPARGC1A/SOX6/BMP5/ARRDC3/MSX2/COL21A1/RUNX2/BBS2/BMP4/GDF5/FOXA1/SOX5/OSR1/RSPO2/NFIB/ARID5B/GDF6/PKDCC/HAND2/OSR2/SMAD3/AXIN2/ROR2/SMAD1/CD34/MAF	33
GO:0046890	GO:0046890	regulation of lipid biosynthetic process	25/975	140/12280	9.81167e-05	0.0039993	0.00326173	PDK4/NR1H3/IDI1/SREBF1/ACACB/FDFT1/SIRT4/SCD/TRIB3/SQLE/PPARGC1A/SC5D/MVK/BMP5/HMGCS1/HMGCR/NR1D1/LDLR/HTR2B/IDH1/LSS/GPER1/MVD/PLA2G6/MALRD1	25
GO:0008203	GO:0008203	cholesterol metabolic process	21/975	108/12280	9.98369e-05	0.00403494	0.00329079	CFTR/MSMO1/IDI1/SREBF1/ACACB/FDFT1/SCD/SQLE/SC5D/MVK/HMGCS1/HMGCR/APOL2/LDLR/HSD17B7/CH25H/CYP39A1/VLDLR/LSS/LIPC/MVD	21
GO:0048729	GO:0048729	tissue morphogenesis	61/975	473/12280	0.000101562	0.00405751	0.0033092	DVL2/MKS1/HGF/CC2D2A/FOXC1/TGFBR3/NTN4/GPC4/TULP3/TBX5/TGFB2/NFATC4/PARD6A/NDRG4/WNT2/HOXA5/GLI3/TGFBR1/GATA3/BMP5/STAT1/MSX2/TBX4/TWIST1/OBSL1/COL21A1/BMP4/SIX1/SMO/ALDH1A2/FOXA1/EPHA7/SETDB2/FOXF2/IFT172/OSR1/RSPO2/ASTN2/ADM/DAB2/FZD7/ARHGAP35/SPRY1/HAND2/SMAD3/COL3A1/ROR2/AR/SMAD1/BCL2/MLLT3/CCL11/HEG1/FZD4/GCNT4/FZD2/ROR1/PBX1/PTCH1/LGR4/ETV5	61
GO:0042733	GO:0042733	embryonic digit morphogenesis	13/975	50/12280	0.000102097	0.00405751	0.0033092	MKS1/TULP3/GLI3/MSX2/TWIST1/BMP4/OSR1/TBC1D32/BCL2L11/HAND2/OSR2/ROR2/IFT140	13
GO:0003206	GO:0003206	cardiac chamber morphogenesis	19/975	93/12280	0.000106294	0.00416366	0.00339577	MKS1/FOXC1/TGFBR3/TBX5/TGFB2/WNT2/TGFBR1/GATA3/BMP5/MSX2/BMP4/SMO/GATA6/SAV1/DHRS3/HAND2/CITED2/HEG1/FZD2	19
GO:0048514	GO:0048514	blood vessel morphogenesis	60/975	464/12280	0.00010722	0.00416366	0.00339577	CX3CL1/E2F2/HGF/C6/CUL7/FOXC1/CALCRL/TGFBR3/TBX5/TGFB2/NFATC4/FGF9/RGCC/ITGB8/HOXA5/TSPAN12/TGFBR1/C5/GAB1/SASH1/THBS4/STAT1/NFE2L2/PIK3R3/TBX4/HOXA7/TWIST1/BMP4/SIX1/ADM2/SMO/PPARG/PDGFRA/HS6ST1/MAP2K5/CYP1B1/GATA6/VASH2/EFNA3/PLK2/ADM/HHEX/ANGPT1/ADAMTS9/HAND2/TLR3/VEGFD/COL3A1/EFNA1/SMAD1/C3AR1/CCL11/HEG1/JUP/CD34/FZD4/EPHB3/PRKD1/MIR503/NOX5	60
GO:0034762	GO:0034762	regulation of transmembrane transport	49/975	357/12280	0.000107637	0.00416366	0.00339577	CFTR/HECW1/CX3CL1/MAPK8IP2/FYN/ATP1A2/NEDD4L/KCNH2/KCNAB2/KCNN2/P2RX7/TRIB3/PPARGC1A/SLC1A2/KLHL24/NFE2L2/RGS2/SLC2A1/TWIST1/OPRL1/SCN2A/SCN7A/AZIN2/OSR1/ANK2/SCN2B/AKAP6/KCNE4/SLC25A27/CNKSR3/KCNJ6/KCNB1/GPER1/IRS1/NLGN1/TCAF2/INSR/TMEM37/KCND3/BCL2/KCNE3/KCNG2/AMIGO1/PLA2G6/KCND2/DRD1/DAPK1/TCAF1/NOX5	49
GO:0045844	GO:0045844	positive regulation of striated muscle tissue development	14/975	57/12280	0.000109133	0.00416366	0.00339577	CYP26B1/CDON/ERBB3/TGFBR3/TBX5/FGF9/WNT2/GLI1/HMGCR/BMP4/PIM1/GATA6/AKAP6/BCL2	14
GO:0048636	GO:0048636	positive regulation of muscle organ development	14/975	57/12280	0.000109133	0.00416366	0.00339577	CYP26B1/CDON/ERBB3/TGFBR3/TBX5/FGF9/WNT2/GLI1/HMGCR/BMP4/PIM1/GATA6/AKAP6/BCL2	14
GO:0016055	GO:0016055	Wnt signaling pathway	51/975	377/12280	0.000113711	0.00427964	0.00349037	HECW1/DVL2/MKS1/ZRANB1/GPC4/GNAO1/BAMBI/TNRC6B/NFATC4/FGF9/PARD6A/WISP1/HBP1/WNT2/TSPAN12/GLI3/TLE4/GATA3/CPZ/GLI1/APC2/ZBED3/NKD2/DAAM2/RSPO2/PTPRO/HHEX/DAB2/MERTK/APCDD1/FZD7/DISC1/FRAT1/SMAD3/NXN/AXIN2/ROR2/MCC/MLLT3/JUP/FZD4/DDIT3/FZD2/ROR1/GNG2/MITF/LRRK2/LDB1/GRK5/LGR4/TMEM170B	51
GO:0050707	GO:0050707	regulation of cytokine secretion	21/975	109/12280	0.000114597	0.00427964	0.00349037	CX3CL1/P2RX7/CD200/RGCC/C5/GATA3/IFIH1/TWIST1/HTR2B/CASP1/TSLP/ANGPT1/TNFRSF14/CD34/TLR1/TLR6/SOCS1/LRRK2/MBP/SCAMP5/LGR4	21
GO:0046165	GO:0046165	alcohol biosynthetic process	23/975	125/12280	0.000115239	0.00427964	0.00349037	CFTR/MSMO1/IDI1/SREBF1/ACACB/FDFT1/SCD/PCK2/SQLE/SC5D/MVK/BMP5/HMGCS1/HMGCR/HSD17B7/ITPKA/LHCGR/IMPA2/ITPKB/LSS/IP6K3/GPER1/MVD	23
GO:0051271	GO:0051271	negative regulation of cellular component movement	37/975	246/12280	0.000116403	0.00427964	0.00349037	CX3CL1/TGFBR3/TBX5/CD200/RGCC/NDRG4/C5/GATA3/PPARGC1A/CDKN1B/RIPOR2/BMP5/NFE2L2/HOXA7/PPARG/MAP2K5/CYP1B1/SEMA6C/PTPRO/SEMA3D/ADAMTS9/CITED2/TP53INP1/COL3A1/MCC/BCL2/SCAI/JUP/KCNE3/RNF41/MITF/SEMA4D/SRGAP3/TCAF1/MIR503/MMP28/DACH1	37
GO:0030325	GO:0030325	adrenal gland development	7/975	16/12280	0.000117558	0.00427964	0.00349037	CDKN1C/PDGFRA/ARID5B/CITED2/SMAD3/INSR/PBX1	7
GO:2000738	GO:2000738	positive regulation of stem cell differentiation	7/975	16/12280	0.000117558	0.00427964	0.00349037	FOXC1/TBX5/TGFB2/SOX6/BMP4/SOX5/GATA6	7
GO:0198738	GO:0198738	cell-cell signaling by wnt	51/975	378/12280	0.000121635	0.00435665	0.00355317	HECW1/DVL2/MKS1/ZRANB1/GPC4/GNAO1/BAMBI/TNRC6B/NFATC4/FGF9/PARD6A/WISP1/HBP1/WNT2/TSPAN12/GLI3/TLE4/GATA3/CPZ/GLI1/APC2/ZBED3/NKD2/DAAM2/RSPO2/PTPRO/HHEX/DAB2/MERTK/APCDD1/FZD7/DISC1/FRAT1/SMAD3/NXN/AXIN2/ROR2/MCC/MLLT3/JUP/FZD4/DDIT3/FZD2/ROR1/GNG2/MITF/LRRK2/LDB1/GRK5/LGR4/TMEM170B	51
GO:0046622	GO:0046622	positive regulation of organ growth	11/975	38/12280	0.000121684	0.00435665	0.00355317	TGFBR3/ACACB/TBX5/FGF9/WNT2/GLI1/SMO/HLX/PIM1/GATA6/AKAP6	11
GO:0021904	GO:0021904	dorsal/ventral neural tube patterning	8/975	21/12280	0.000122414	0.00435665	0.00355317	MKS1/TULP3/GLI3/BMP4/SMO/FOXA1/TBC1D32/PTCH1	8
GO:0048511	GO:0048511	rhythmic process	33/975	211/12280	0.000126309	0.00446198	0.00363908	NR1H3/PER3/OPN3/SREBF1/TGFB2/DBP/AHR/MAP2K6/PPARGC1A/KLF9/ENOX1/TWIST1/BHLHE41/OPRL1/NR1D1/ATF4/JUND/PPARG/PDGFRA/ARRB1/LHCGR/MSTN/NCOA2/TP53/CIART/TEF/SIN3A/PROKR1/NLGN1/NR1D2/FZD4/KCND2/LGR4	33
GO:0051216	GO:0051216	cartilage development	27/975	159/12280	0.000127517	0.00447154	0.00364687	PITX1/FGF9/ITGB8/HOXA5/GLI3/TGFBR1/SOX6/BMP5/MSX2/COL21A1/RUNX2/BBS2/BMP4/GDF5/SOX5/OSR1/RSPO2/NFIB/GDF6/PKDCC/HAND2/OSR2/SMAD3/AXIN2/ROR2/SMAD1/MAF	27
GO:0046620	GO:0046620	regulation of organ growth	16/975	72/12280	0.000130561	0.00448114	0.0036547	FOXC1/TGFBR3/ACACB/TBX5/FGF9/WNT2/TGFBR1/GLI1/RGS2/SMO/HLX/PIM1/GATA6/AKAP6/SAV1/BCL2L11	16
GO:0050810	GO:0050810	regulation of steroid biosynthetic process	16/975	72/12280	0.000130561	0.00448114	0.0036547	IDI1/SREBF1/ACACB/FDFT1/SCD/SQLE/PPARGC1A/SC5D/MVK/BMP5/HMGCS1/HMGCR/NR1D1/LSS/MVD/MALRD1	16
GO:0050663	GO:0050663	cytokine secretion	23/975	126/12280	0.00013061	0.00448114	0.0036547	CX3CL1/BTN3A1/P2RX7/CD200/RGCC/C5/GATA3/IFIH1/TWIST1/HTR2B/CASP1/TSLP/ANGPT1/TNFRSF14/CD34/TLR1/TLR6/SOCS1/LRRK2/MBP/SCAMP5/LGR4/NOX5	23
GO:0003333	GO:0003333	amino acid transmembrane transport	14/975	58/12280	0.000133499	0.00454754	0.00370885	ATP1A2/SLC1A2/SLC38A1/SLC1A4/RGS2/SLC38A2/SLC38A4/OSR1/SLC7A11/SLC16A12/SLC1A7/SLC43A2/SLC6A9/SLC25A29	14
GO:0045137	GO:0045137	development of primary sexual characteristics	28/975	169/12280	0.000149078	0.00504197	0.0041121	ARID4A/FOXC1/TGFB2/DMC1/FGF9/LFNG/TGFBR1/GATA3/HMGCS1/TNFSF10/PDGFRA/ARRB1/LHCGR/IDH1/GATA6/OSR1/ARID5B/BCL2L11/KIT/HMGB2/RHOBTB3/TLR3/CITED2/AR/INSR/BCL2/FZD4/DACH1	28
GO:0072189	GO:0072189	ureter development	6/975	12/12280	0.000150128	0.00504197	0.0041121	GATA3/BMP4/SIX1/ALDH1A2/OSR1/NFIA	6
GO:0002791	GO:0002791	regulation of peptide secretion	43/975	305/12280	0.000153603	0.0051226	0.00417786	CFTR/CX3CL1/NR1H3/SREBF1/P2RX7/SIRT4/CD200/TGFB2/RGCC/C5/GATA3/EXPH5/HMGCR/IFIH1/SLC2A1/TWIST1/NR1D1/SNAP25/HTR2B/ARRB1/CASP1/SIRT3/TSLP/ITPR1/ANGPT1/RAB11FIP1/TNFRSF14/KCNB1/GPER1/OR51E2/IRS1/CD34/TLR1/TLR6/UCP2/KCNG2/EFNA5/PLA2G6/SOCS1/LRRK2/MBP/SCAMP5/LGR4	43
GO:0060395	GO:0060395	SMAD protein signal transduction	13/975	52/12280	0.000157437	0.00517806	0.00422309	TGFB2/TGFBR1/BMP5/BMP4/GDF5/MSTN/INHBE/DAB2/GDF6/SMAD3/ROR2/SMAD1/GDF10	13
GO:0090181	GO:0090181	regulation of cholesterol metabolic process	13/975	52/12280	0.000157437	0.00517806	0.00422309	IDI1/SREBF1/ACACB/FDFT1/SCD/SQLE/SC5D/MVK/HMGCS1/HMGCR/LDLR/LSS/MVD	13
GO:0055024	GO:0055024	regulation of cardiac muscle tissue development	15/975	66/12280	0.000161059	0.00526089	0.00429065	ERBB3/TGFBR3/TBX5/FGF9/WNT2/TGFBR1/SOX6/GLI1/RGS2/BMP4/PIM1/GATA6/AKAP6/SAV1/FZD7	15
GO:0043009	GO:0043009	chordate embryonic development	59/975	461/12280	0.000162243	0.00526353	0.0042928	DVL2/MKS1/MBTD1/C6/CC2D2A/FOXC1/TULP3/TGFB2/FGF9/WNT2/HOXA2/LFNG/HOXA5/HOXA6/GLI3/TGFBR1/C5/GATA3/SOX6/BMP5/KIAA1217/HOXA7/TWIST1/BHLHE41/RUNX2/BMP4/SIX1/SMO/ALDH1A2/FOXA1/CDKN1C/PDGFRA/HS6ST1/IFT172/TET1/GATA6/VASH2/OSR1/TBC1D32/ADM/BCL2L11/ANGPT1/NPM2/ARHGAP35/HAND2/OSR2/SALL2/SMAD3/AXIN2/ROR2/AR/SIN3A/ARNT2/HEG1/FZD2/PBX1/PTCH1/IFT140/INPP5B	59
GO:0001819	GO:0001819	positive regulation of cytokine production	40/975	278/12280	0.000166797	0.00537471	0.00438347	CX3CL1/HGF/P2RX7/CD200/NFATC4/RGCC/C5/GATA3/DHX58/IFIH1/STAT1/TWIST1/IRF1/ATF4/HTR2B/DDX60/CASP1/CYP1B1/TSLP/CEBPG/TNFRSF14/IL6R/IFI16/HMGB2/TLR3/SMAD3/AFAP1L2/ADORA2B/C3AR1/HEG1/CD34/TLR1/TLR6/IL20RB/DDIT3/CARD9/LRRK2/MBP/SCAMP5/RAB7B	40
GO:1902652	GO:1902652	secondary alcohol metabolic process	21/975	112/12280	0.00017112	0.00547699	0.00446689	CFTR/MSMO1/IDI1/SREBF1/ACACB/FDFT1/SCD/SQLE/SC5D/MVK/HMGCS1/HMGCR/APOL2/LDLR/HSD17B7/CH25H/CYP39A1/VLDLR/LSS/LIPC/MVD	21
GO:0009792	GO:0009792	embryo development ending in birth or egg hatching	60/975	472/12280	0.000172434	0.00548227	0.0044712	DVL2/MKS1/MBTD1/C6/CC2D2A/FOXC1/TULP3/TGFB2/FGF9/WNT2/HOXA2/LFNG/HOXA5/HOXA6/GLI3/TGFBR1/C5/GATA3/SOX6/BMP5/KIAA1217/HOXA7/TWIST1/BHLHE41/RUNX2/BMP4/SIX1/SMO/ALDH1A2/FOXA1/CDKN1C/PDGFRA/HS6ST1/IFT172/TET1/GATA6/VASH2/OSR1/TBC1D32/ADM/BCL2L11/ANGPT1/NPM2/ARHGAP35/HAND2/OSR2/SALL2/SMAD3/AXIN2/ROR2/AR/SIN3A/ARNT2/STOX2/HEG1/FZD2/PBX1/PTCH1/IFT140/INPP5B	60
GO:0034698	GO:0034698	response to gonadotropin	8/975	22/12280	0.000179056	0.00565508	0.00461214	TGFBR3/ASNS/PPARGC1A/HMGCS1/LHCGR/GATA6/PAPPA/EFNA5	8
GO:0021544	GO:0021544	subpallium development	7/975	17/12280	0.000186201	0.00584206	0.00476463	GLI3/BBS2/FOXP2/SLC7A11/SLITRK5/DRD1/LRRK2	7
GO:0008584	GO:0008584	male gonad development	20/975	105/12280	0.000194344	0.0060577	0.0049405	ARID4A/TGFB2/FGF9/TGFBR1/GATA3/HMGCS1/TNFSF10/PDGFRA/LHCGR/GATA6/ARID5B/BCL2L11/KIT/HMGB2/RHOBTB3/TLR3/CITED2/AR/INSR/BCL2	20
GO:0060411	GO:0060411	cardiac septum morphogenesis	14/975	60/12280	0.000196627	0.00608895	0.00496599	MKS1/TGFBR3/TBX5/TGFB2/TGFBR1/BMP5/MSX2/BMP4/SMO/GATA6/SAV1/DHRS3/CITED2/FZD2	14
GO:0019216	GO:0019216	regulation of lipid metabolic process	42/975	299/12280	0.0001979	0.00608895	0.00496599	PDK4/PDK2/NR1H3/IDI1/SREBF1/ACACB/FDFT1/SIRT4/SCD/PIK3IP1/MTMR3/TRIB3/SQLE/PPARGC1A/SC5D/MVK/BMP5/HMGCS1/HMGCR/PIK3R3/TWIST1/NR1D1/LDLR/PPARG/GRHL1/PDGFRA/HTR2B/IDH1/NCOA2/RGL1/KIT/LSS/GPER1/FMC1/MVD/IRS1/SIN3A/NR1D2/PRKD1/PLA2G6/SOCS1/MALRD1	42
GO:0019218	GO:0019218	regulation of steroid metabolic process	18/975	90/12280	0.000212328	0.00649099	0.00529388	IDI1/SREBF1/ACACB/FDFT1/SCD/SQLE/PPARGC1A/SC5D/MVK/BMP5/HMGCS1/HMGCR/NR1D1/LDLR/KIT/LSS/MVD/MALRD1	18
GO:0046546	GO:0046546	development of primary male sexual characteristics	20/975	106/12280	0.000222035	0.00674449	0.00550063	ARID4A/TGFB2/FGF9/TGFBR1/GATA3/HMGCS1/TNFSF10/PDGFRA/LHCGR/GATA6/ARID5B/BCL2L11/KIT/HMGB2/RHOBTB3/TLR3/CITED2/AR/INSR/BCL2	20
GO:0006939	GO:0006939	smooth muscle contraction	15/975	68/12280	0.000229198	0.006918	0.00564214	ATP1A2/CALCRL/RGS2/BBS2/HTR2B/PLCE1/KIT/GUCY1A1/GPER1/BDKRB2/ADRA1B/ADORA2B/CHRM2/PLA2G6/DRD1	15
GO:0072001	GO:0072001	renal system development	34/975	227/12280	0.000235098	0.00701563	0.00572177	CYP26B1/FOXC1/TGFB2/GLI3/TGFBR1/GATA3/STAT1/BMP4/SIX1/SMO/ALDH1A2/CDKN1C/PDGFRA/EPHA7/PLCE1/OSR1/ARID5B/PTPRO/BCL2L11/ANGPT1/NFIA/KLF15/SPRY1/OSR2/SMAD3/SMAD1/BCL2/CD34/GCNT4/PBX1/PTCH1/IFT140/LRRK2/LGR4	34
GO:0001525	GO:0001525	angiogenesis	52/975	398/12280	0.000236191	0.00701563	0.00572177	CX3CL1/E2F2/HGF/C6/FOXC1/CALCRL/TGFB2/NFATC4/FGF9/RGCC/ITGB8/HOXA5/TSPAN12/TGFBR1/C5/GAB1/SASH1/THBS4/STAT1/NFE2L2/PIK3R3/TBX4/HOXA7/TWIST1/BMP4/ADM2/PPARG/PDGFRA/HS6ST1/MAP2K5/CYP1B1/GATA6/VASH2/EFNA3/PLK2/ADM/HHEX/ANGPT1/ADAMTS9/HAND2/TLR3/VEGFD/EFNA1/SMAD1/C3AR1/CCL11/JUP/CD34/EPHB3/PRKD1/MIR503/NOX5	52
GO:0001656	GO:0001656	metanephros development	14/975	61/12280	0.000236845	0.00701563	0.00572177	GLI3/GATA3/STAT1/BMP4/SIX1/SMO/PDGFRA/OSR1/SPRY1/OSR2/BCL2/CD34/PTCH1/LGR4	14
GO:0008406	GO:0008406	gonad development	27/975	165/12280	0.00023952	0.00705105	0.00575066	ARID4A/FOXC1/TGFB2/DMC1/FGF9/LFNG/TGFBR1/GATA3/HMGCS1/TNFSF10/PDGFRA/ARRB1/LHCGR/IDH1/GATA6/OSR1/ARID5B/BCL2L11/KIT/HMGB2/RHOBTB3/TLR3/CITED2/AR/INSR/BCL2/FZD4	27
GO:0060562	GO:0060562	epithelial tube morphogenesis	36/975	246/12280	0.000248808	0.00727956	0.00593702	DVL2/MKS1/CC2D2A/TULP3/TGFB2/NFATC4/NDRG4/WNT2/HOXA5/GLI3/GATA3/BMP5/MSX2/TWIST1/BMP4/SIX1/SMO/FOXA1/EPHA7/SETDB2/IFT172/OSR1/RSPO2/ADM/ARHGAP35/SPRY1/HAND2/SMAD3/AR/BCL2/CCL11/FZD2/PBX1/PTCH1/LGR4/ETV5	36
GO:0030323	GO:0030323	respiratory tube development	24/975	140/12280	0.000255842	0.00734005	0.00598636	SREBF1/TULP3/TBX5/FGF9/WNT2/HOXA5/GLI3/GLI1/TBX4/ATXN1/BMP4/FOXP2/ALDH1A2/FOXA1/PDGFRA/HS6ST1/GATA6/RSPO2/NFIB/SLC7A11/SAV1/PKDCC/SPRY1/HEG1	24
GO:0007200	GO:0007200	phospholipase C-activating G protein-coupled receptor signaling pathway	11/975	41/12280	0.000256236	0.00734005	0.00598636	OPRL1/LHCGR/PLCE1/GPR65/GNA14/ADRA1B/C3AR1/CHRM2/DRD1/LPAR1/GPR20	11
GO:0061005	GO:0061005	cell differentiation involved in kidney development	11/975	41/12280	0.000256236	0.00734005	0.00598636	GLI3/GATA3/STAT1/BMP4/SMO/OSR1/PTPRO/KLF15/CD34/PTCH1/LGR4	11
GO:0001817	GO:0001817	regulation of cytokine production	56/975	439/12280	0.000257606	0.00734005	0.00598636	CX3CL1/HGF/P2RX7/CD200/TGFB2/NFATC4/RGCC/JAK3/ITGB8/C5/GATA3/DHX58/DTX4/IFIH1/STAT1/TWIST1/NMI/IRF1/ATF4/HTR2B/ARRB1/DDX60/CASP1/MAP2K5/CYP1B1/HERC5/GATA6/TSLP/PDCD4/MERTK/CD96/CEBPG/ANGPT1/TNFRSF14/IL6R/IFI16/HMGB2/TLR3/SMAD3/INPP5D/AFAP1L2/ADORA2B/C3AR1/HEG1/CD34/TLR1/TLR6/IL20RB/DDIT3/SOCS1/CARD9/LRRK2/MBP/SCAMP5/LGR4/RAB7B	56
GO:0030539	GO:0030539	male genitalia development	6/975	13/12280	0.000260111	0.00734005	0.00598636	BMP5/PDGFRA/LHCGR/ROR2/AR/LGR4	6
GO:0032354	GO:0032354	response to follicle-stimulating hormone	6/975	13/12280	0.000260111	0.00734005	0.00598636	TGFBR3/ASNS/PPARGC1A/HMGCS1/PAPPA/EFNA5	6
GO:0001654	GO:0001654	eye development	37/975	256/12280	0.000264144	0.00736669	0.00600809	CC2D2A/FOXC1/CDON/TULP3/TGFB2/FGF9/WNT2/TSPAN12/GLI3/TGFBR1/GATA3/TWIST1/BMP4/BFSP1/FOXP2/ALDH1A2/CDKN1C/PDGFRA/FOXF2/CYP1B1/TBC1D32/SHROOM2/SLC7A11/MERTK/ARHGAP35/CPAMD8/OSR2/SALL2/SMAD3/BCL2/FZD4/SIX5/MAF/SLITRK6/MITF/IFT140/NR2E3	37
GO:0150063	GO:0150063	visual system development	37/975	256/12280	0.000264144	0.00736669	0.00600809	CC2D2A/FOXC1/CDON/TULP3/TGFB2/FGF9/WNT2/TSPAN12/GLI3/TGFBR1/GATA3/TWIST1/BMP4/BFSP1/FOXP2/ALDH1A2/CDKN1C/PDGFRA/FOXF2/CYP1B1/TBC1D32/SHROOM2/SLC7A11/MERTK/ARHGAP35/CPAMD8/OSR2/SALL2/SMAD3/BCL2/FZD4/SIX5/MAF/SLITRK6/MITF/IFT140/NR2E3	37
GO:0010862	GO:0010862	positive regulation of pathway-restricted SMAD protein phosphorylation	10/975	35/12280	0.000278113	0.00764661	0.00623638	TGFB2/TGFBR1/BMP5/BMP4/GDF5/MSTN/INHBE/DAB2/GDF6/GDF10	10
GO:0048701	GO:0048701	embryonic cranial skeleton morphogenesis	10/975	35/12280	0.000278113	0.00764661	0.00623638	TULP3/HOXA2/TGFBR1/TWIST1/RUNX2/BMP4/SIX1/PDGFRA/SMAD3/IFT140	10
GO:0043010	GO:0043010	camera-type eye development	33/975	220/12280	0.000280848	0.00764661	0.00623638	CC2D2A/FOXC1/CDON/TULP3/TGFB2/WNT2/TSPAN12/GLI3/TGFBR1/GATA3/TWIST1/BMP4/BFSP1/FOXP2/ALDH1A2/CDKN1C/PDGFRA/FOXF2/CYP1B1/TBC1D32/SHROOM2/SLC7A11/MERTK/ARHGAP35/OSR2/SMAD3/FZD4/SIX5/MAF/SLITRK6/MITF/IFT140/NR2E3	33
GO:0035136	GO:0035136	forelimb morphogenesis	9/975	29/12280	0.000282198	0.00764661	0.00623638	TBX5/MSX2/TWIST1/RUNX2/GDF5/ALDH1A2/OSR1/RSPO2/OSR2	9
GO:0060317	GO:0060317	cardiac epithelial to mesenchymal transition	9/975	29/12280	0.000282198	0.00764661	0.00623638	TGFBR3/TGFB2/WNT2/TGFBR1/MSX2/TWIST1/PDCD4/SPRY1/EFNA1	9
GO:0048880	GO:0048880	sensory system development	37/975	257/12280	0.000285651	0.00767015	0.00625558	CC2D2A/FOXC1/CDON/TULP3/TGFB2/FGF9/WNT2/TSPAN12/GLI3/TGFBR1/GATA3/TWIST1/BMP4/BFSP1/FOXP2/ALDH1A2/CDKN1C/PDGFRA/FOXF2/CYP1B1/TBC1D32/SHROOM2/SLC7A11/MERTK/ARHGAP35/CPAMD8/OSR2/SALL2/SMAD3/BCL2/FZD4/SIX5/MAF/SLITRK6/MITF/IFT140/NR2E3	37
GO:0042475	GO:0042475	odontogenesis of dentin-containing tooth	13/975	55/12280	0.000287892	0.00767015	0.00625558	FOXC1/GNAO1/GLI3/MSX2/RUNX2/BMP4/SMO/PDGFRA/RSPO2/ADM/BCL2L11/HAND2/FAM20C	13
GO:0061035	GO:0061035	regulation of cartilage development	13/975	55/12280	0.000287892	0.00767015	0.00625558	GLI3/TGFBR1/SOX6/RUNX2/BMP4/GDF5/SOX5/GDF6/PKDCC/SMAD3/AXIN2/SMAD1/MAF	13
GO:0051962	GO:0051962	positive regulation of nervous system development	52/975	402/12280	0.000302095	0.00796194	0.00649355	DVL2/CX3CL1/FYN/HGF/CUL7/NEDD4L/CDON/TRPC5/NDRG4/GLI3/GLI1/BMP5/NFE2L2/RGS2/PLPPR5/OBSL1/BMP4/GDF5/FLRT1/ZC4H2/RNF112/SMO/FOXA1/GFAP/PPARG/AVIL/TUBB2B/ITPKA/LRRTM2/VLDLR/TENM4/GDF6/KIT/ARHGAP35/DISC1/GPER1/SLITRK5/NLGN1/BCL2/LRRN3/FZD4/PLAG1/AMIGO1/EPHB3/CAMK1D/PRKD1/EFNA5/SLITRK6/MAPT/SEMA4D/LPAR1/ETV5	52
GO:0001505	GO:0001505	regulation of neurotransmitter levels	34/975	230/12280	0.000302183	0.00796194	0.00649355	ATP1A2/CADPS2/P2RX7/FBXL20/SLC1A2/SLC38A1/ALDH5A1/RGS2/GFAP/SNAP25/DMGDH/STX11/CYP1B1/MCTP2/HNMT/SLC7A11/SV2A/SLC1A7/ENPP6/GPER1/SMAD3/NLGN1/ADORA2B/INSR/CD34/TLR6/SLC29A2/CHRM2/LRTOMT/DRD1/LRRK2/MAOA/SLC6A9/COLQ	34
GO:0006865	GO:0006865	amino acid transport	17/975	85/12280	0.000315343	0.00826302	0.0067391	SLC7A14/ATP1A2/P2RX7/SLC1A2/SLC38A1/SLC1A4/RGS2/SLC38A2/SLC38A4/OSR1/SLC7A11/SLC16A12/SV2A/SLC1A7/SLC43A2/SLC6A9/SLC25A29	17
GO:0042149	GO:0042149	cellular response to glucose starvation	11/975	42/12280	0.000322575	0.00840635	0.006856	ASNS/SESN1/MTMR3/NFE2L2/SLC2A1/ATF4/TP53/SESN3/IFI16/BCL2/NIM1K	11
GO:0015849	GO:0015849	organic acid transport	30/975	195/12280	0.00033673	0.00868036	0.00707948	CROT/SLC7A14/ATP1A2/ACACB/P2RX7/MAP2K6/SLC1A2/SLC38A1/SLC1A4/RGS2/PPARG/SLC38A2/SLC38A4/NCOA2/OSR1/SLC26A1/SLC7A11/SLC16A12/SV2A/SLC1A7/SLC16A14/PROCA1/SLC43A2/BDKRB2/SLC16A5/STARD5/SLC16A13/PLA2G6/SLC6A9/SLC25A29	30
GO:0046942	GO:0046942	carboxylic acid transport	30/975	195/12280	0.00033673	0.00868036	0.00707948	CROT/SLC7A14/ATP1A2/ACACB/P2RX7/MAP2K6/SLC1A2/SLC38A1/SLC1A4/RGS2/PPARG/SLC38A2/SLC38A4/NCOA2/OSR1/SLC26A1/SLC7A11/SLC16A12/SV2A/SLC1A7/SLC16A14/PROCA1/SLC43A2/BDKRB2/SLC16A5/STARD5/SLC16A13/PLA2G6/SLC6A9/SLC25A29	30
GO:0001816	GO:0001816	cytokine production	60/975	484/12280	0.000339046	0.00869308	0.00708985	CX3CL1/HGF/BTN3A1/P2RX7/CD200/TGFB2/NFATC4/RGCC/JAK3/ITGB8/C5/GATA3/DHX58/DTX4/IFIH1/STAT1/TWIST1/NMI/IRF1/ATF4/HTR2B/ARRB1/DDX60/CASP1/MAP2K5/CYP1B1/HERC5/GATA6/TSLP/PDCD4/MERTK/CD96/CEBPG/ANGPT1/KIT/TNFRSF14/IL6R/IFI16/HMGB2/TLR3/SMAD3/INPP5D/AFAP1L2/ADORA2B/C3AR1/HEG1/CD34/TLR1/TLR6/IL20RB/DDIT3/MAF/SOCS1/CARD9/LRRK2/MBP/SCAMP5/LGR4/NOX5/RAB7B	60
GO:1905114	GO:1905114	cell surface receptor signaling pathway involved in cell-cell signaling	56/975	444/12280	0.000344058	0.0087744	0.00715618	HECW1/DVL2/MAPK8IP2/MKS1/ZRANB1/GPC4/GNAO1/P2RX7/BAMBI/TNRC6B/NFATC4/FGF9/PARD6A/WISP1/HBP1/WNT2/TSPAN12/GLI3/TLE4/GATA3/CPZ/GLI1/APC2/BMP4/SMO/ZBED3/NKD2/DAAM2/RSPO2/PTPRO/HHEX/DAB2/MERTK/APCDD1/FZD7/DISC1/FRAT1/SMAD3/NXN/AXIN2/ROR2/NLGN1/MCC/MLLT3/JUP/FZD4/DDIT3/FZD2/ROR1/GNG2/MITF/LRRK2/LDB1/GRK5/LGR4/TMEM170B	56
GO:0003151	GO:0003151	outflow tract morphogenesis	13/975	56/12280	0.000348107	0.00883043	0.00720187	DVL2/FOXC1/TGFBR3/TGFB2/MSX2/TWIST1/BMP4/SIX1/GATA6/DHRS3/HAND2/CITED2/FZD2	13
GO:0072073	GO:0072073	kidney epithelium development	19/975	102/12280	0.000374634	0.00945306	0.00770967	FOXC1/GLI3/GATA3/STAT1/BMP4/SIX1/SMO/EPHA7/OSR1/PTPRO/KLF15/SPRY1/SMAD3/SMAD1/BCL2/CD34/PBX1/PTCH1/LGR4	19
GO:0051963	GO:0051963	regulation of synapse assembly	15/975	71/12280	0.000377539	0.00947622	0.00772856	MUSK/GPC4/FLRT1/SIX1/EPHA7/LRRTM2/SLITRK5/NLGN1/LRRN3/AMIGO1/EPHB3/EFNA5/SLITRK6/SLIT1/COLQ	15
GO:0007189	GO:0007189	adenylate cyclase-activating G protein-coupled receptor signaling pathway	14/975	64/12280	0.000402566	0.010041	0.00818914	CALCRL/ARRDC3/OPRL1/ADM2/LHCGR/GPR65/ADM/GPR78/GPER1/ADRA1B/ADORA2B/DRD1/GNG2/LGR4	14
GO:0007186	GO:0007186	G protein-coupled receptor signaling pathway	58/975	467/12280	0.000404249	0.010041	0.00818914	CX3CL1/OPN3/CALCRL/TULP3/GNAO1/C5/GPR63/ARRDC3/PDE1A/PLCL1/RGS2/OPRL1/ADM2/ATF4/SMO/ARHGEF6/PPARG/HTR2B/ARRB1/LHCGR/PLCE1/FGD4/GPR65/ADM/GPR78/FZD7/GNA14/CCR1/GPR85/GPR146/GPER1/OR51E2/OR51B5/BDKRB2/PROKR1/TAS1R3/ADRA1B/ADORA2B/GPR37/INSR/C3AR1/CCL11/MRGPRF/FZD4/FZD2/CHRM2/GPR88/NXPH3/PTGDR2/OR51B4/KCTD16/DRD1/GNG2/LRRK2/LPAR1/GRK5/GPR20/LGR4	58
GO:0030324	GO:0030324	lung development	23/975	136/12280	0.000417131	0.0101728	0.00829669	SREBF1/TBX5/FGF9/WNT2/HOXA5/GLI3/GLI1/TBX4/ATXN1/BMP4/FOXP2/ALDH1A2/FOXA1/PDGFRA/HS6ST1/GATA6/RSPO2/NFIB/SLC7A11/SAV1/PKDCC/SPRY1/HEG1	23
GO:0035051	GO:0035051	cardiocyte differentiation	20/975	111/12280	0.000418841	0.0101728	0.00829669	TGFBR3/TBX5/TGFB2/SOX6/RGS2/TWIST1/OBSL1/BMP4/FHOD3/PDGFRA/MYLK3/GATA6/TENM4/PDCD4/AKAP6/FZD7/VCAM1/SPRY1/HAND2/GPER1	20
GO:0035116	GO:0035116	embryonic hindlimb morphogenesis	7/975	19/12280	0.000418908	0.0101728	0.00829669	PITX1/MSX2/TWIST1/BMP4/OSR1/RSPO2/OSR2	7
GO:0060037	GO:0060037	pharyngeal system development	7/975	19/12280	0.000418908	0.0101728	0.00829669	TGFB2/TGFBR1/GATA3/BMP5/BMP4/SIX1/PTCH1	7
GO:0009799	GO:0009799	specification of symmetry	17/975	87/12280	0.000420223	0.0101728	0.00829669	MKS1/DNAH5/CC2D2A/IFT74/NDRG4/BMP4/SMO/ALDH1A2/SETDB2/IFT172/DAAM2/TBC1D32/HAND2/CITED2/SMAD3/DDIT3/IFT140	17
GO:0021756	GO:0021756	striatum development	6/975	14/12280	0.000424716	0.0101782	0.00830111	BBS2/FOXP2/SLC7A11/SLITRK5/DRD1/LRRK2	6
GO:2000136	GO:2000136	regulation of cell proliferation involved in heart morphogenesis	6/975	14/12280	0.000424716	0.0101782	0.00830111	MKS1/TBX5/BMP4/SIX1/PIM1/HAND2	6
GO:0001822	GO:0001822	kidney development	32/975	216/12280	0.000431978	0.0103005	0.00840083	CYP26B1/FOXC1/TGFB2/GLI3/TGFBR1/GATA3/STAT1/BMP4/SIX1/SMO/ALDH1A2/CDKN1C/PDGFRA/EPHA7/PLCE1/OSR1/ARID5B/PTPRO/BCL2L11/ANGPT1/KLF15/SPRY1/OSR2/SMAD3/SMAD1/BCL2/CD34/GCNT4/PBX1/PTCH1/LRRK2/LGR4	32
GO:0034341	GO:0034341	response to interferon-gamma	22/975	128/12280	0.000438449	0.0104028	0.00848425	CX3CL1/NR1H3/MID1/OAS2/STAT1/NMI/IRF1/PPARG/TRIM5/CASP1/PARP9/RAB20/ADAMTS13/GBP4/VCAM1/TLR3/IRF2/CCL11/PARP14/SOCS1/DAPK1/RAB7B	22
GO:0001823	GO:0001823	mesonephros development	15/975	72/12280	0.000442533	0.0104477	0.00852089	FOXC1/GLI3/GATA3/BMP4/SIX1/SMO/OSR1/SPRY1/OSR2/SMAD3/SMAD1/BCL2/PBX1/PTCH1/LGR4	15
GO:0006940	GO:0006940	regulation of smooth muscle contraction	10/975	37/12280	0.000456125	0.0107156	0.00873935	ATP1A2/CALCRL/RGS2/PLCE1/KIT/GUCY1A1/GPER1/ADRA1B/ADORA2B/CHRM2	10
GO:0090100	GO:0090100	positive regulation of transmembrane receptor protein serine/threonine kinase signaling pathway	16/975	80/12280	0.000468836	0.0109602	0.00893884	TGFBR3/TGFB2/FGF9/TGFBR1/BMP5/MSX2/BMP4/GDF5/CDKN1C/MSTN/INHBE/CDKN2B/DAB2/GDF6/CITED2/GDF10	16
GO:0002062	GO:0002062	chondrocyte differentiation	18/975	96/12280	0.000487242	0.0112579	0.00918168	FGF9/GLI3/TGFBR1/SOX6/MSX2/COL21A1/RUNX2/BMP4/GDF5/SOX5/OSR1/NFIB/GDF6/PKDCC/OSR2/SMAD3/AXIN2/MAF	18
GO:0048566	GO:0048566	embryonic digestive tract development	8/975	25/12280	0.000488654	0.0112579	0.00918168	TGFB2/FGF9/GLI3/ALDH1A2/PDGFRA/HLX/FOXF2/PKDCC	8
GO:0060428	GO:0060428	lung epithelium development	8/975	25/12280	0.000488654	0.0112579	0.00918168	WNT2/HOXA5/BMP4/FOXP2/FOXA1/GATA6/NFIB/SAV1	8
GO:0021532	GO:0021532	neural tube patterning	9/975	31/12280	0.000491633	0.0112721	0.00919323	MKS1/TULP3/GLI3/BMP4/SMO/FOXA1/TBC1D32/PTCH1/IFT140	9
GO:0040013	GO:0040013	negative regulation of locomotion	36/975	255/12280	0.00050081	0.0113884	0.00928813	CX3CL1/TBX5/CD200/RGCC/NDRG4/C5/GATA3/PPARGC1A/RIPOR2/BMP5/ARRDC3/NFE2L2/HOXA7/PPARG/TRIM5/MAP2K5/CYP1B1/SEMA6C/PTPRO/SEMA3D/ADAMTS9/CITED2/TP53INP1/COL3A1/MCC/BCL2/SCAI/JUP/RNF41/MITF/SEMA4D/SRGAP3/TCAF1/MIR503/MMP28/DACH1	36
GO:0060541	GO:0060541	respiratory system development	25/975	155/12280	0.000501483	0.0113884	0.00928813	SREBF1/TULP3/TBX5/FGF9/WNT2/HOXA5/GLI3/GLI1/TBX4/ATXN1/BMP4/SIX1/FOXP2/ALDH1A2/FOXA1/PDGFRA/HS6ST1/GATA6/RSPO2/NFIB/SLC7A11/SAV1/PKDCC/SPRY1/HEG1	25
GO:0060420	GO:0060420	regulation of heart growth	12/975	51/12280	0.000511217	0.0115545	0.00942353	TGFBR3/ACACB/TBX5/FGF9/WNT2/TGFBR1/GLI1/RGS2/PIM1/GATA6/AKAP6/SAV1	12
GO:0051091	GO:0051091	positive regulation of DNA-binding transcription factor activity	30/975	200/12280	0.000521656	0.0117348	0.0095706	DVL2/CX3CL1/CD200/RGCC/WNT2/PPARGC1A/CTH/TNFSF18/SMO/FOXA1/PPARG/TRIM5/ARID5B/SAV1/JMY/CEBPG/KIT/TLR3/SMAD3/AR/JUP/TLR6/FZD4/DDIT3/FZD2/RNF41/CAMK1D/PRKD1/ROR1/RAB7B	30
GO:0003012	GO:0003012	muscle system process	41/975	304/12280	0.000551681	0.0123519	0.0100739	ATP1A2/NEDD4L/KCNH2/CALCRL/KCNN2/GNAO1/MAP2K6/PPARGC1A/RGS2/OBSL1/BBS2/DTNA/HTR2B/SCN7A/PLCE1/MSTN/PDE5A/GATA6/ANK2/SCN2B/AKAP6/KCNE4/KIT/LMOD1/KLF15/HAND2/GUCY1A1/GPER1/SMAD3/BDKRB2/ADRA1B/ADORA2B/KCND3/SNTB1/JUP/GTF2IRD2B/KCNE3/CHRM2/PLA2G6/DRD1/GTF2IRD2	41
GO:0003018	GO:0003018	vascular process in circulatory system	18/975	97/12280	0.000554816	0.0123641	0.0100838	ATP1A2/FOXC1/HMGCR/RGS2/BBS2/HTR2B/MYLK3/ADM/ANGPT1/ARHGAP35/GUCY1A1/GPER1/BDKRB2/ADRA1B/ADORA2B/PLA2G6/PTP4A3/DRD1	18
GO:0046068	GO:0046068	cGMP metabolic process	5/975	10/12280	0.000561057	0.012445	0.0101498	GUCY1B1/PDE1A/PDE5A/GUCY1A2/GUCY1A1	5
GO:0010463	GO:0010463	mesenchymal cell proliferation	10/975	38/12280	0.000575569	0.0127078	0.0103642	FGF9/WNT2/STAT1/BMP4/SIX1/FOXP2/SMO/OSR1/NFIB/HAND2	10
GO:0009308	GO:0009308	amine metabolic process	13/975	59/12280	0.00059682	0.0131009	0.0106848	SIRT4/DMGDH/AZIN2/HNMT/SLC7A11/TDO2/VCAM1/HAAO/ATCAY/GPR37/DRD1/MAOA/INMT	13
GO:0010092	GO:0010092	specification of animal organ identity	7/975	20/12280	0.000600633	0.0131009	0.0106848	WNT2/GLI3/BMP4/SIX1/SPRY1/AXIN2/AR	7
GO:0050715	GO:0050715	positive regulation of cytokine secretion	15/975	74/12280	0.000601614	0.0131009	0.0106848	P2RX7/RGCC/C5/GATA3/IFIH1/TWIST1/HTR2B/CASP1/TSLP/TNFRSF14/CD34/TLR1/LRRK2/MBP/SCAMP5	15
GO:0050807	GO:0050807	regulation of synapse organization	25/975	157/12280	0.000609735	0.0132174	0.0107798	FYN/MUSK/GPC4/CTTNBP2/LZTS3/NFATC4/FLRT1/SIX1/EPHA7/ITPKA/LRRTM2/SLC7A11/PTPRO/SLITRK5/EFNA1/NLGN1/LRRN3/AMIGO1/EPHB3/EFNA5/SLITRK6/SLIT1/LRRK2/COLQ/ETV5	25
GO:0034765	GO:0034765	regulation of ion transmembrane transport	40/975	296/12280	0.00061626	0.0132984	0.0108458	CFTR/HECW1/CX3CL1/MAPK8IP2/FYN/ATP1A2/NEDD4L/KCNH2/KCNAB2/KCNN2/P2RX7/PPARGC1A/KLHL24/RGS2/TWIST1/OPRL1/SCN2A/SCN7A/OSR1/ANK2/SCN2B/AKAP6/KCNE4/CNKSR3/KCNJ6/KCNB1/GPER1/NLGN1/TCAF2/TMEM37/KCND3/KCNE3/KCNG2/AMIGO1/PLA2G6/KCND2/DRD1/DAPK1/TCAF1/NOX5	40
GO:0048705	GO:0048705	skeletal system morphogenesis	27/975	175/12280	0.000624937	0.0134249	0.010949	CYP26B1/HOXC8/FOXC1/TULP3/P2RX7/HOXA2/HOXA5/HOXA6/GLI3/TGFBR1/MSX2/TBX4/HOXA7/TWIST1/COL21A1/RUNX2/BMP4/SIX1/PDGFRA/OSR1/ARID5B/DHRS3/OSR2/SMAD3/AXIN2/ROR2/IFT140	27
GO:0060043	GO:0060043	regulation of cardiac muscle cell proliferation	9/975	32/12280	0.0006364	0.0135491	0.0110503	TGFBR3/TBX5/FGF9/WNT2/TGFBR1/GLI1/PIM1/GATA6/SAV1	9
GO:0060421	GO:0060421	positive regulation of heart growth	9/975	32/12280	0.0006364	0.0135491	0.0110503	TGFBR3/ACACB/TBX5/FGF9/WNT2/GLI1/PIM1/GATA6/AKAP6	9
GO:0035115	GO:0035115	embryonic forelimb morphogenesis	8/975	26/12280	0.000657209	0.0139299	0.0113609	TBX5/MSX2/TWIST1/RUNX2/ALDH1A2/OSR1/RSPO2/OSR2	8
GO:0042135	GO:0042135	neurotransmitter catabolic process	6/975	15/12280	0.000660541	0.0139386	0.0113679	ALDH5A1/DMGDH/HNMT/LRTOMT/MAOA/COLQ	6
GO:0051480	GO:0051480	regulation of cytosolic calcium ion concentration	29/975	194/12280	0.000678929	0.0142635	0.0116329	TSPOAP1/CX3CL1/FYN/ATP1A2/TRPC5/P2RX7/TRPA1/OPRL1/PDGFRA/HTR2B/PLCE1/GPR65/ANK2/ADM/ITPR1/AKAP6/TMEM178A/CCR1/GPER1/SMAD3/BDKRB2/ADRA1B/BCL2/C3AR1/DDIT3/PLA2G6/DRD1/LPAR1/GPR20	29
GO:0070374	GO:0070374	positive regulation of ERK1 and ERK2 cascade	23/975	141/12280	0.00070441	0.0147339	0.0120166	CX3CL1/MUSK/ERBB3/NDRG4/EPHB6/HMGCR/BMP4/PDGFRA/EPHA7/HTR2B/ARRB1/GAREM1/MERTK/ANGPT1/KIT/CCR1/HAND2/GPER1/ROR2/INSR/CCL11/EPHB3/ROR1	23
GO:0051193	GO:0051193	regulation of cofactor metabolic process	13/975	60/12280	0.000707512	0.0147342	0.0120168	PDK4/PDK2/FYN/P2RX7/HDAC6/PPARGC1A/NFE2L2/CLYBL/SLC7A11/MPV17L/DDIT4/INSR/NOXA1	13
GO:0019933	GO:0019933	cAMP-mediated signaling	18/975	99/12280	0.000714481	0.0147951	0.0120665	CALCRL/AHR/ARRDC3/RGS2/OPRL1/ADM2/LHCGR/GPR65/ADM/AKAP6/GPR78/GPER1/ADRA1B/ADORA2B/DRD1/GNG2/LPAR1/LGR4	18
GO:0050777	GO:0050777	negative regulation of immune response	16/975	83/12280	0.000718163	0.0147951	0.0120665	NR1H3/TGFB2/JAK3/AMBP/DHX58/NMI/PPARG/HLX/CD96/ANGPT1/IFI16/COL3A1/INPP5D/SERPINB9/PARP14/IL20RB	16
GO:0055025	GO:0055025	positive regulation of cardiac muscle tissue development	10/975	39/12280	0.000719743	0.0147951	0.0120665	ERBB3/TGFBR3/TBX5/FGF9/WNT2/GLI1/BMP4/PIM1/GATA6/AKAP6	10
GO:0071229	GO:0071229	cellular response to acid chemical	25/975	159/12280	0.000737859	0.0151024	0.0123171	CYP26B1/PDK4/FYN/SREBF1/SESN1/NFATC4/WNT2/HOXA2/PPARGC1A/SIX1/ALDH1A2/LDLR/PPARG/PDGFRA/OSR1/SESN3/FZD7/OR51E2/COL3A1/FZD4/SOCS1/GNG2/CASTOR1/CASTOR3/CASTOR2	25
GO:0060070	GO:0060070	canonical Wnt signaling pathway	32/975	223/12280	0.000758118	0.0154507	0.0126012	HECW1/DVL2/MKS1/BAMBI/FGF9/WNT2/GLI3/TLE4/GATA3/GLI1/APC2/ZBED3/NKD2/DAAM2/RSPO2/PTPRO/DAB2/FZD7/FRAT1/SMAD3/AXIN2/ROR2/MCC/MLLT3/JUP/FZD4/DDIT3/FZD2/MITF/LRRK2/LGR4/TMEM170B	32
GO:0071396	GO:0071396	cellular response to lipid	54/975	439/12280	0.000795992	0.0161536	0.0131744	CFTR/CYP26B1/PDK4/CX3CL1/ATP1A2/NR1H3/SREBF1/HDAC6/PCK2/NFATC4/WNT2/HOXA2/AHR/PPARGC1A/SASH1/HMGCS1/KLF9/MSX2/BMP4/NR1D1/SMO/ALDH1A2/FOXA1/LDLR/PPARG/TRIM5/PIM1/MGARP/CASP1/MSTN/OSR1/SKP2/NR6A1/PDCD4/ZFP36L2/DAB2/BCL2L11/FZD7/FBXO32/ADAMTS13/HMGB2/CREBRF/GPER1/OR51E2/DDIT4/AR/NR1D2/FZD4/EFNA5/PTCH1/GNG2/ESRRG/LPAR1/NR2E3	54
GO:0048286	GO:0048286	lung alveolus development	9/975	33/12280	0.0008142	0.0164531	0.0134187	HOXA5/ATXN1/BMP4/FOXP2/FOXA1/HS6ST1/GATA6/SLC7A11/PKDCC	9
GO:0003279	GO:0003279	cardiac septum development	17/975	92/12280	0.000822258	0.0164865	0.0134459	MKS1/TGFBR3/TBX5/TGFB2/TGFBR1/GATA3/BMP5/MSX2/BMP4/SMO/GATA6/ANK2/SAV1/DHRS3/CITED2/HEG1/FZD2	17
GO:0018108	GO:0018108	peptidyl-tyrosine phosphorylation	38/975	281/12280	0.000822768	0.0164865	0.0134459	DVL2/FYN/HGF/MUSK/ERBB3/TESK2/CASS4/FGF9/DYRK1B/JAK3/EPHB6/MAP2K6/THBS4/TNFSF18/PDGFRA/EPHA7/MAP2K5/PARP9/TP53/TSLP/CTF1/MERTK/ANGPT1/SLA/KIT/TNFRSF14/IL6R/PKDCC/ROR2/AFAP1L2/EFNA1/INSR/PARP14/EPHB3/EFNA5/SOCS1/ROR1/SEMA4D	38
GO:0019935	GO:0019935	cyclic-nucleotide-mediated signaling	20/975	117/12280	0.000841744	0.0167262	0.0136414	GUCY1B1/CALCRL/AHR/ARRDC3/RGS2/OPRL1/ADM2/HTR2B/LHCGR/GPR65/ADM/AKAP6/GPR78/GPER1/ADRA1B/ADORA2B/DRD1/GNG2/LPAR1/LGR4	20
GO:0048813	GO:0048813	dendrite morphogenesis	20/975	117/12280	0.000841744	0.0167262	0.0136414	HECW1/MAPK8IP2/FYN/CUL7/NEDD4L/TRPC5/LZTS3/HDAC6/NFATC4/OBSL1/BTBD3/ITPKA/VLDLR/SLITRK5/EFNA1/NLGN1/KNDC1/EPHB3/SEMA4D/LRRK2	20
GO:0007623	GO:0007623	circadian rhythm	23/975	143/12280	0.000860336	0.0170247	0.0138849	NR1H3/PER3/OPN3/SREBF1/DBP/AHR/PPARGC1A/KLF9/BHLHE41/OPRL1/NR1D1/ATF4/JUND/PPARG/NCOA2/TP53/CIART/SIN3A/PROKR1/NLGN1/NR1D2/KCND2/LGR4	23
GO:0001763	GO:0001763	morphogenesis of a branching structure	24/975	152/12280	0.000878347	0.0172369	0.014058	MKS1/HGF/NTN4/NFATC4/WNT2/HOXA5/GLI3/MSX2/BMP4/SIX1/SMO/FOXA1/EPHA7/RSPO2/ADM/SPRY1/AR/BCL2/CCL11/PBX1/PTCH1/LRRK2/LGR4/ETV5	24
GO:0009953	GO:0009953	dorsal/ventral pattern formation	12/975	54/12280	0.00088552	0.0172369	0.014058	MKS1/TULP3/HOXA2/GLI3/GLI1/BMP4/SMO/FOXA1/IFT172/TBC1D32/DDIT3/PTCH1	12
GO:0032755	GO:0032755	positive regulation of interleukin-6 production	12/975	54/12280	0.00088552	0.0172369	0.014058	P2RX7/IFIH1/TWIST1/TSLP/IL6R/TLR3/ADORA2B/TLR1/TLR6/CARD9/MBP/RAB7B	12
GO:2000736	GO:2000736	regulation of stem cell differentiation	12/975	54/12280	0.00088552	0.0172369	0.014058	FOXC1/TBX5/TGFB2/GATA3/SOX6/NFE2L2/BMP4/SOX5/PDGFRA/GATA6/ZFP36L2/LDB1	12
GO:0007204	GO:0007204	positive regulation of cytosolic calcium ion concentration	26/975	170/12280	0.000892615	0.0173044	0.014113	CX3CL1/FYN/ATP1A2/TRPC5/P2RX7/TRPA1/OPRL1/PDGFRA/HTR2B/PLCE1/GPR65/ANK2/ADM/ITPR1/AKAP6/CCR1/GPER1/BDKRB2/ADRA1B/BCL2/C3AR1/DDIT3/PLA2G6/DRD1/LPAR1/GPR20	26
GO:0001657	GO:0001657	ureteric bud development	14/975	69/12280	0.000896531	0.0173099	0.0141175	FOXC1/GLI3/GATA3/BMP4/SIX1/SMO/OSR1/SPRY1/SMAD3/SMAD1/BCL2/PBX1/PTCH1/LGR4	14
GO:0055021	GO:0055021	regulation of cardiac muscle tissue growth	11/975	47/12280	0.000909842	0.0174961	0.0142694	TGFBR3/TBX5/FGF9/WNT2/TGFBR1/GLI1/RGS2/PIM1/GATA6/AKAP6/SAV1	11
GO:0008544	GO:0008544	epidermis development	30/975	207/12280	0.000928646	0.0177444	0.0144719	CYP26B1/FOXC1/ALDH3A2/FOSL2/TGFB2/IFT74/EXPH5/GLI1/RIPOR2/PPL/MSX2/HOXA7/BMP4/TNFRSF19/SMO/GRHL1/IFT172/SAV1/APCDD1/LDB2/INSR/BCL2/JUP/SATB1/LRTOMT/SLITRK6/PTCH1/LDB1/LGR4/TXNIP	30
GO:0072009	GO:0072009	nephron epithelium development	15/975	77/12280	0.000930195	0.0177444	0.0144719	FOXC1/GLI3/GATA3/STAT1/BMP4/SIX1/SMO/OSR1/PTPRO/KLF15/BCL2/CD34/PBX1/PTCH1/LGR4	15
GO:0001503	GO:0001503	ossification	39/975	293/12280	0.000961013	0.0181969	0.0148409	HGF/FOXC1/P2RX7/TGFB2/RASSF2/FGF9/HOXA2/GLI3/GLI1/BMP5/MSX2/TWIST1/RUNX2/BMP4/GDF5/SMO/JUND/OSR1/RSPO2/IL6R/DHRS3/PKDCC/CCR1/HAND2/OSR2/SMAD3/AXIN2/ROR2/MN1/SMAD1/BCL2/FAM20C/PRKD1/PBX1/PTCH1/SEMA4D/NBR1/LGR4/GDF10	39
GO:0090185	GO:0090185	negative regulation of kidney development	5/975	11/12280	0.000961547	0.0181969	0.0148409	GATA3/STAT1/BMP4/SIX1/OSR1	5
GO:0045444	GO:0045444	fat cell differentiation	26/975	171/12280	0.000975314	0.0183028	0.0149273	SREBF1/RUNX1T1/HDAC6/TRIB3/GATA3/PPARGC1A/RGS2/ALDH6A1/MSX2/BBS9/BBS2/NR1D1/PPARG/NUDT7/PLAC8/ARID5B/SAV1/ZFP36L2/GDF6/GPER1/SMAD3/DDIT3/CCDC85B/SOCS1/GRK5/GDF10	26
GO:0060333	GO:0060333	interferon-gamma-mediated signaling pathway	13/975	62/12280	0.00098118	0.0183028	0.0149273	NR1H3/MID1/OAS2/STAT1/NMI/IRF1/PPARG/TRIM5/PARP9/VCAM1/IRF2/PARP14/SOCS1	13
GO:0009404	GO:0009404	toxin metabolic process	6/975	16/12280	0.00098633	0.0183028	0.0149273	FMO2/NFE2L2/CTH/CYP1B1/CBS/CBSL	6
GO:0043586	GO:0043586	tongue development	6/975	16/12280	0.00098633	0.0183028	0.0149273	CYP26B1/GLI3/SIX1/KIT/HAND2/BNC2	6
GO:1904262	GO:1904262	negative regulation of TORC1 signaling	6/975	16/12280	0.00098633	0.0183028	0.0149273	SESN1/SESN3/BMT2/CASTOR1/CASTOR3/CASTOR2	6
GO:0018212	GO:0018212	peptidyl-tyrosine modification	38/975	284/12280	0.00100626	0.0186002	0.0151699	DVL2/FYN/HGF/MUSK/ERBB3/TESK2/CASS4/FGF9/DYRK1B/JAK3/EPHB6/MAP2K6/THBS4/TNFSF18/PDGFRA/EPHA7/MAP2K5/PARP9/TP53/TSLP/CTF1/MERTK/ANGPT1/SLA/KIT/TNFRSF14/IL6R/PKDCC/ROR2/AFAP1L2/EFNA1/INSR/PARP14/EPHB3/EFNA5/SOCS1/ROR1/SEMA4D	38
GO:0072006	GO:0072006	nephron development	18/975	102/12280	0.00102722	0.0188996	0.0154141	FOXC1/GLI3/GATA3/STAT1/BMP4/SIX1/SMO/PDGFRA/PLCE1/OSR1/PTPRO/ANGPT1/KLF15/BCL2/CD34/PBX1/PTCH1/LGR4	18
GO:0086009	GO:0086009	membrane repolarization	9/975	34/12280	0.00103038	0.0188996	0.0154141	ATP1A2/NEDD4L/KCNH2/KCNN2/ANK2/AKAP6/KCNE4/KCND3/KCNE3	9
GO:0072163	GO:0072163	mesonephric epithelium development	14/975	70/12280	0.00104044	0.0189383	0.0154456	FOXC1/GLI3/GATA3/BMP4/SIX1/SMO/OSR1/SPRY1/SMAD3/SMAD1/BCL2/PBX1/PTCH1/LGR4	14
GO:0072164	GO:0072164	mesonephric tubule development	14/975	70/12280	0.00104044	0.0189383	0.0154456	FOXC1/GLI3/GATA3/BMP4/SIX1/SMO/OSR1/SPRY1/SMAD3/SMAD1/BCL2/PBX1/PTCH1/LGR4	14
GO:1901343	GO:1901343	negative regulation of vasculature development	17/975	94/12280	0.00105712	0.0191688	0.0156336	E2F2/FOXC1/TGFB2/FGF9/RGCC/HOXA5/THBS4/STAT1/BMP4/PPARG/MAP2K5/EFNA3/PLK2/PDCD4/HHEX/ADAMTS9/MIR503	17
GO:0050803	GO:0050803	regulation of synapse structure or activity	25/975	163/12280	0.00106588	0.0192307	0.0156841	FYN/MUSK/GPC4/CTTNBP2/LZTS3/NFATC4/FLRT1/SIX1/EPHA7/ITPKA/LRRTM2/SLC7A11/PTPRO/SLITRK5/EFNA1/NLGN1/LRRN3/AMIGO1/EPHB3/EFNA5/SLITRK6/SLIT1/LRRK2/COLQ/ETV5	25
GO:0050709	GO:0050709	negative regulation of protein secretion	15/975	78/12280	0.00106893	0.0192307	0.0156841	CX3CL1/NR1H3/SREBF1/SIRT4/CD200/RGCC/HMGCR/ANGPT1/RAB11FIP1/KCNB1/IRS1/CD34/TLR6/UCP2/LGR4	15
GO:0009855	GO:0009855	determination of bilateral symmetry	16/975	86/12280	0.00107263	0.0192307	0.0156841	MKS1/DNAH5/CC2D2A/IFT74/NDRG4/SMO/ALDH1A2/SETDB2/IFT172/DAAM2/TBC1D32/HAND2/CITED2/SMAD3/DDIT3/IFT140	16
GO:0032835	GO:0032835	glomerulus development	11/975	48/12280	0.00109711	0.0195317	0.0159295	FOXC1/BMP4/PDGFRA/PLCE1/OSR1/PTPRO/ANGPT1/KLF15/BCL2/CD34/LGR4	11
GO:0120163	GO:0120163	negative regulation of cold-induced thermogenesis	10/975	41/12280	0.00109761	0.0195317	0.0159295	NR1H3/MAP2K6/ARRDC3/PLCL1/NR1D1/ATF4/NOVA1/ADAMTS5/DDIT3/LGR4	10
GO:0007224	GO:0007224	smoothened signaling pathway	19/975	111/12280	0.00110433	0.0195783	0.0159675	MKS1/CC2D2A/CDON/TULP3/FGF9/GLI3/GLI1/RUNX2/BMP4/SMO/TTBK2/FOXA1/IFT172/BOC/TBC1D32/ROR2/GAS1/PTCH1/IFT140	19
GO:0062012	GO:0062012	regulation of small molecule metabolic process	37/975	276/12280	0.00112507	0.0197658	0.0161204	PDK4/PDK2/NR1H3/IDI1/SREBF1/ACACB/FDFT1/P2RX7/SIRT4/SCD/TRIB3/SQLE/PPARGC1A/SC5D/MVK/BMP5/HMGCS1/HMGCR/TWIST1/GNMT/CLYBL/NR1D1/LDLR/PPARG/LHCGR/NCOA2/SLC7A11/KIT/LSS/GPER1/MVD/ATCAY/DDIT4/IRS1/ADORA2B/INSR/MALRD1	37
GO:0048806	GO:0048806	genitalia development	8/975	28/12280	0.00113384	0.0197658	0.0161204	BMP5/PDGFRA/FOXF2/LHCGR/MERTK/ROR2/AR/LGR4	8
GO:0150076	GO:0150076	neuroinflammatory response	8/975	28/12280	0.00113384	0.0197658	0.0161204	CX3CL1/CD200/SMO/LDLR/TLR3/TLR6/MAPT/LRRK2	8
GO:0008299	GO:0008299	isoprenoid biosynthetic process	7/975	22/12280	0.00114806	0.0197658	0.0161204	IDI1/FDFT1/MVK/HMGCS1/HMGCR/ALDH1A2/MVD	7
GO:0035456	GO:0035456	response to interferon-beta	7/975	22/12280	0.00114806	0.0197658	0.0161204	STAT1/IFIT3/IRF1/XAF1/TLR3/IFIT1/PLSCR1	7
GO:0045932	GO:0045932	negative regulation of muscle contraction	7/975	22/12280	0.00114806	0.0197658	0.0161204	ATP1A2/CALCRL/RGS2/PDE5A/GUCY1A1/ADORA2B/KCNE3	7
GO:0048512	GO:0048512	circadian behavior	7/975	22/12280	0.00114806	0.0197658	0.0161204	PER3/OPRL1/NCOA2/TP53/CIART/NLGN1/KCND2	7
GO:0060045	GO:0060045	positive regulation of cardiac muscle cell proliferation	7/975	22/12280	0.00114806	0.0197658	0.0161204	TGFBR3/TBX5/FGF9/WNT2/GLI1/PIM1/GATA6	7
GO:0048839	GO:0048839	inner ear development	20/975	120/12280	0.00116532	0.0199908	0.016304	DVL2/MKS1/MYO15A/TGFB2/FGF9/GLI3/GATA3/CDKN1B/RIPOR2/PLPPR4/BMP4/SIX1/LRIG3/SLC25A27/ROR2/MAF/FZD2/LRTOMT/SLITRK6/ROR1	20
GO:0036473	GO:0036473	cell death in response to oxidative stress	14/975	71/12280	0.00120325	0.0205017	0.0167207	FYN/HGF/HDAC6/NCOA7/NFE2L2/ATF4/RNF112/CYP1B1/SLC7A11/GPR37/BCL2/TLR6/LRRK2/MAP3K5	14
GO:0070372	GO:0070372	regulation of ERK1 and ERK2 cascade	29/975	201/12280	0.00120371	0.0205017	0.0167207	CX3CL1/MUSK/ERBB3/NDRG4/EPHB6/HMGCR/BMP4/PDGFRA/EPHA7/HTR2B/ARRB1/GAREM1/SIRT3/MERTK/CNKSR3/ANGPT1/KIT/ATF3/CCR1/SPRY1/HAND2/GPER1/PSCA/ROR2/INSR/CCL11/EPHB3/ROR1/MIR503	29
GO:0043269	GO:0043269	regulation of ion transport	50/975	407/12280	0.00126114	0.0214035	0.0174562	CFTR/HECW1/CX3CL1/MAPK8IP2/FYN/ATP1A2/NEDD4L/KCNH2/KCNAB2/KCNN2/GNAO1/P2RX7/MAP2K6/PPARGC1A/STC2/KLHL24/RGS2/TWIST1/OPRL1/ATF4/SCN2A/SCN7A/OSR1/ANK2/SCN2B/AKAP6/KCNE4/CNKSR3/KCNJ6/KCNB1/SV2A/CCR1/GPER1/PACSIN3/PXK/NLGN1/TCAF2/TMEM37/KCND3/BCL2/IL16/KCNE3/KCNG2/AMIGO1/PLA2G6/KCND2/DRD1/DAPK1/TCAF1/NOX5	50
GO:0009306	GO:0009306	protein secretion	46/975	368/12280	0.00136235	0.0230392	0.0187902	CFTR/CX3CL1/NR1H3/BTN3A1/SREBF1/P2RX7/SIRT4/CD200/TGFB2/RGCC/C5/GATA3/EXPH5/HMGCR/IFIH1/SLC2A1/TWIST1/NR1D1/SNAP25/HTR2B/ARRB1/CASP1/SIRT3/TSLP/ITPR1/ANGPT1/RAB11FIP1/TNFRSF14/KCNB1/GPER1/OR51E2/IRS1/CD34/TLR1/TLR6/UCP2/KCNG2/EFNA5/PLA2G6/SOCS1/LRRK2/MBP/SCAMP5/LGR4/CTAGE1/NOX5	46
GO:0010717	GO:0010717	regulation of epithelial to mesenchymal transition	14/975	72/12280	0.00138688	0.0233711	0.0190608	FOXC1/TBX5/TGFB2/BAMBI/RGCC/TGFBR1/BMP5/TWIST1/BMP4/FOXA1/DAB2/SMAD3/AXIN2/EFNA1	14
GO:0001774	GO:0001774	microglial cell activation	6/975	17/12280	0.00142276	0.0235596	0.0192146	CX3CL1/LDLR/TLR3/TLR6/MAPT/LRRK2	6
GO:0002269	GO:0002269	leukocyte activation involved in inflammatory response	6/975	17/12280	0.00142276	0.0235596	0.0192146	CX3CL1/LDLR/TLR3/TLR6/MAPT/LRRK2	6
GO:0035025	GO:0035025	positive regulation of Rho protein signal transduction	6/975	17/12280	0.00142276	0.0235596	0.0192146	ARRB1/GPR65/COL3A1/LPAR1/GPR20/PRAG1	6
GO:0070242	GO:0070242	thymocyte apoptotic process	6/975	17/12280	0.00142276	0.0235596	0.0192146	JAK3/GLI3/BMP4/TP53/BCL2L11/EFNA1	6
GO:1905809	GO:1905809	negative regulation of synapse organization	6/975	17/12280	0.00142276	0.0235596	0.0192146	FYN/NFATC4/EPHA7/EFNA1/NLGN1/SLIT1	6
GO:0055023	GO:0055023	positive regulation of cardiac muscle tissue growth	8/975	29/12280	0.00145827	0.023981	0.0195583	TGFBR3/TBX5/FGF9/WNT2/GLI1/PIM1/GATA6/AKAP6	8
GO:1905517	GO:1905517	macrophage migration	8/975	29/12280	0.00145827	0.023981	0.0195583	CX3CL1/CD200/C5/MTUS1/MSTN/ROR2/C3AR1/MMP28	8
GO:0006936	GO:0006936	muscle contraction	32/975	232/12280	0.00148225	0.0242915	0.0198115	ATP1A2/NEDD4L/KCNH2/CALCRL/KCNN2/GNAO1/MAP2K6/RGS2/OBSL1/BBS2/DTNA/HTR2B/SCN7A/PLCE1/PDE5A/ANK2/SCN2B/KCNE4/KIT/LMOD1/GUCY1A1/GPER1/BDKRB2/ADRA1B/ADORA2B/KCND3/SNTB1/JUP/KCNE3/CHRM2/PLA2G6/DRD1	32
GO:0030336	GO:0030336	negative regulation of cell migration	29/975	204/12280	0.00151943	0.0248157	0.020239	CX3CL1/TBX5/CD200/RGCC/NDRG4/C5/PPARGC1A/RIPOR2/BMP5/NFE2L2/HOXA7/PPARG/MAP2K5/CYP1B1/ADAMTS9/CITED2/TP53INP1/COL3A1/MCC/BCL2/SCAI/JUP/RNF41/MITF/SRGAP3/TCAF1/MIR503/MMP28/DACH1	29
GO:0007622	GO:0007622	rhythmic behavior	7/975	23/12280	0.00153853	0.0248299	0.0202507	PER3/OPRL1/NCOA2/TP53/CIART/NLGN1/KCND2	7
GO:0014002	GO:0014002	astrocyte development	7/975	23/12280	0.00153853	0.0248299	0.0202507	SMO/LDLR/GFAP/ROR2/DRD1/ROR1/MAPT	7
GO:0061900	GO:0061900	glial cell activation	7/975	23/12280	0.00153853	0.0248299	0.0202507	CX3CL1/SMO/LDLR/TLR3/TLR6/MAPT/LRRK2	7
GO:0060487	GO:0060487	lung epithelial cell differentiation	5/975	12/12280	0.00154113	0.0248299	0.0202507	HOXA5/FOXA1/GATA6/NFIB/SAV1	5
GO:0060389	GO:0060389	pathway-restricted SMAD protein phosphorylation	11/975	50/12280	0.0015672	0.0251649	0.0205239	TGFBR3/TGFB2/TGFBR1/BMP5/BMP4/GDF5/MSTN/INHBE/DAB2/GDF6/GDF10	11
GO:0010718	GO:0010718	positive regulation of epithelial to mesenchymal transition	10/975	43/12280	0.00162375	0.0259854	0.0211931	FOXC1/TGFB2/BAMBI/RGCC/TGFBR1/TWIST1/BMP4/DAB2/SMAD3/AXIN2	10
GO:0010720	GO:0010720	positive regulation of cell development	50/975	412/12280	0.001641	0.0261737	0.0213466	DVL2/CX3CL1/FYN/HGF/CUL7/NEDD4L/CDON/TRPC5/CARMIL1/CASS4/NDRG4/GLI3/BMP5/NFE2L2/RGS2/PLPPR5/OBSL1/BMP4/GDF5/ZC4H2/RNF112/SMO/FOXA1/GFAP/PPARG/AVIL/TUBB2B/ITPKA/PDE5A/MYLK3/VLDLR/TENM4/AKAP6/GDF6/KIT/ARHGAP35/DISC1/GPER1/NLGN1/BCL2/FZD4/PLAG1/AMIGO1/CAMK1D/PRKD1/EFNA5/MAPT/SEMA4D/LPAR1/ETV5	50
GO:0061138	GO:0061138	morphogenesis of a branching epithelium	22/975	141/12280	0.00165448	0.0263007	0.0214501	MKS1/HGF/NTN4/NFATC4/WNT2/HOXA5/GLI3/MSX2/BMP4/SIX1/SMO/FOXA1/RSPO2/ADM/SPRY1/AR/BCL2/CCL11/PBX1/PTCH1/LGR4/ETV5	22
GO:2000146	GO:2000146	negative regulation of cell motility	30/975	215/12280	0.00171109	0.0271103	0.0221105	CX3CL1/TBX5/CD200/RGCC/NDRG4/C5/GATA3/PPARGC1A/RIPOR2/BMP5/NFE2L2/HOXA7/PPARG/MAP2K5/CYP1B1/ADAMTS9/CITED2/TP53INP1/COL3A1/MCC/BCL2/SCAI/JUP/RNF41/MITF/SRGAP3/TCAF1/MIR503/MMP28/DACH1	30
GO:0002792	GO:0002792	negative regulation of peptide secretion	15/975	82/12280	0.00181089	0.0285965	0.0233226	CX3CL1/NR1H3/SREBF1/SIRT4/CD200/RGCC/HMGCR/ANGPT1/RAB11FIP1/KCNB1/IRS1/CD34/TLR6/UCP2/LGR4	15
GO:0070371	GO:0070371	ERK1 and ERK2 cascade	30/975	216/12280	0.00184067	0.0289709	0.0236279	CX3CL1/MUSK/ERBB3/NDRG4/EPHB6/HMGCR/BMP4/PDGFRA/EPHA7/HTR2B/ARRB1/GAREM1/SIRT3/ZFP36L2/MERTK/CNKSR3/ANGPT1/KIT/ATF3/CCR1/SPRY1/HAND2/GPER1/PSCA/ROR2/INSR/CCL11/EPHB3/ROR1/MIR503	30
GO:0050769	GO:0050769	positive regulation of neurogenesis	45/975	364/12280	0.00190686	0.0299138	0.0243969	DVL2/CX3CL1/FYN/HGF/CUL7/NEDD4L/CDON/TRPC5/NDRG4/GLI3/BMP5/NFE2L2/RGS2/PLPPR5/OBSL1/BMP4/GDF5/ZC4H2/RNF112/SMO/FOXA1/GFAP/PPARG/AVIL/TUBB2B/ITPKA/VLDLR/TENM4/GDF6/KIT/ARHGAP35/DISC1/GPER1/NLGN1/BCL2/FZD4/PLAG1/AMIGO1/CAMK1D/PRKD1/EFNA5/MAPT/SEMA4D/LPAR1/ETV5	45
GO:0071407	GO:0071407	cellular response to organic cyclic compound	50/975	415/12280	0.00191423	0.029931	0.0244109	CFTR/ATP1A2/NR1H3/P2RX7/HDAC6/PCK2/NFATC4/AHR/PPARGC1A/HMGCS1/IFIH1/STAT1/KLF9/MSX2/BMP4/NR1D1/SIX1/ATF4/SMO/FOXA1/PPARG/PIM1/MGARP/CYP1B1/MSTN/SKP2/NR6A1/AKAP6/ZFP36L2/DAB2/BCL2L11/FBXO32/TLR3/CREBRF/GPER1/OR51E2/DDIT4/AR/SIN3A/SMAD1/JUP/NR1D2/EFNA5/DRD1/IFIT1/PTCH1/GNG2/LRRK2/ESRRG/NR2E3	50
GO:0060326	GO:0060326	cell chemotaxis	25/975	170/12280	0.0019468	0.0300657	0.0245208	CX3CL1/HGF/TGFB2/C5/GAB1/RIPOR2/THBS4/MTUS1/PDGFRA/CH25H/MSTN/PTPRO/KIT/IL6R/VCAM1/CCR1/HMGB2/VEGFD/C3AR1/CCL11/IL16/CAMK1D/PRKD1/LPAR1/MMP28	25
GO:0060688	GO:0060688	regulation of morphogenesis of a branching structure	10/975	44/12280	0.00195454	0.0300657	0.0245208	HGF/NTN4/WNT2/BMP4/SIX1/SMO/AR/LRRK2/LGR4/ETV5	10
GO:0045668	GO:0045668	negative regulation of osteoblast differentiation	9/975	37/12280	0.00196994	0.0300657	0.0245208	HOXA2/TWIST1/HAND2/SMAD3/AXIN2/PTCH1/SEMA4D/NBR1/GDF10	9
GO:0021522	GO:0021522	spinal cord motor neuron differentiation	6/975	18/12280	0.00199219	0.0300657	0.0245208	GLI3/LHX4/ZC4H2/IFT172/ISL2/PTCH1	6
GO:0031290	GO:0031290	retinal ganglion cell axon guidance	6/975	18/12280	0.00199219	0.0300657	0.0245208	EPHA7/PTPRO/ISL2/EPHB3/EFNA5/SLIT1	6
GO:0038111	GO:0038111	interleukin-7-mediated signaling pathway	6/975	18/12280	0.00199219	0.0300657	0.0245208	JAK3/TSLP/IRS1/SOCS1/HIST1H3G/HIST1H3E	6
GO:0051482	GO:0051482	positive regulation of cytosolic calcium ion concentration involved in phospholipase C-activating G protein-coupled signaling pathway	6/975	18/12280	0.00199219	0.0300657	0.0245208	OPRL1/GPR65/C3AR1/DRD1/LPAR1/GPR20	6
GO:0060914	GO:0060914	heart formation	6/975	18/12280	0.00199219	0.0300657	0.0245208	TBX5/BMP4/SIX1/PIM1/HAND2/AXIN2	6
GO:0072202	GO:0072202	cell differentiation involved in metanephros development	6/975	18/12280	0.00199219	0.0300657	0.0245208	STAT1/BMP4/SMO/OSR1/CD34/LGR4	6
GO:0098760	GO:0098760	response to interleukin-7	6/975	18/12280	0.00199219	0.0300657	0.0245208	JAK3/TSLP/IRS1/SOCS1/HIST1H3G/HIST1H3E	6
GO:0098761	GO:0098761	cellular response to interleukin-7	6/975	18/12280	0.00199219	0.0300657	0.0245208	JAK3/TSLP/IRS1/SOCS1/HIST1H3G/HIST1H3E	6
GO:0030902	GO:0030902	hindbrain development	18/975	108/12280	0.0020113	0.0301631	0.0246003	FOXC1/AARS/HOXA2/PPARGC1A/GLI1/BMP5/FOXP2/SMO/TTBK2/ALDH1A2/FAIM2/NFIB/SMAD1/BCL2/KNDC1/FZD4/LPAR1/LDB1	18
GO:0061008	GO:0061008	hepaticobiliary system development	18/975	108/12280	0.0020113	0.0301631	0.0246003	MKS1/HGF/TGFBR3/ASNS/PCK2/DBP/GLI3/GLI1/HMGCS1/ALDH1A2/HLX/GATA6/ARID5B/CEBPG/CITED2/SMAD3/UCP2/PTCH1	18
GO:0036003	GO:0036003	positive regulation of transcription from RNA polymerase II promoter in response to stress	7/975	24/12280	0.00202508	0.03018	0.024614	HSF2/NFE2L2/CHD6/ATF4/TP53/ATF3/DDIT3	7
GO:0046320	GO:0046320	regulation of fatty acid oxidation	7/975	24/12280	0.00202508	0.03018	0.024614	PDK4/ACACB/SIRT4/PPARGC1A/TWIST1/PPARG/IRS1	7
GO:0060993	GO:0060993	kidney morphogenesis	13/975	67/12280	0.00207137	0.0307738	0.0250983	GLI3/GATA3/STAT1/BMP4/SIX1/SMO/OSR1/BCL2/GCNT4/PBX1/PTCH1/LRRK2/LGR4	13
GO:0048754	GO:0048754	branching morphogenesis of an epithelial tube	19/975	117/12280	0.00208826	0.0309283	0.0252243	MKS1/NFATC4/WNT2/HOXA5/GLI3/MSX2/BMP4/SIX1/SMO/FOXA1/RSPO2/SPRY1/AR/BCL2/CCL11/PBX1/PTCH1/LGR4/ETV5	19
GO:0045995	GO:0045995	regulation of embryonic development	17/975	100/12280	0.00212969	0.0314443	0.0256452	DVL2/MKS1/TULP3/WNT2/LFNG/GATA3/NFE2L2/BMP4/SIX1/MAP2K5/OSR1/TENM4/FZD7/AR/INSR/FZD2/MBP	17
GO:0031348	GO:0031348	negative regulation of defense response	20/975	126/12280	0.00213917	0.0314868	0.0256798	CX3CL1/HGF/NR1H3/CALCRL/CD200/GATA3/DHX58/MVK/NMI/LDLR/PPARG/PDCD4/CD96/IFI16/GPER1/SMAD3/SERPINB9/PARP14/IL20RB/IFIT1	20
GO:0043123	GO:0043123	positive regulation of I-kappaB kinase/NF-kappaB signaling	23/975	153/12280	0.00216813	0.0318148	0.0259473	CASP10/CX3CL1/FYN/ALPK1/CTH/TNFSF10/TNFRSF19/APOL3/TRIM5/HTR2B/CASP1/PELI2/SECTM1/TIFA/PLK2/LURAP1L/TLR3/CXXC5/TLR6/PRKD1/ROR1/CARD9/LPAR1	23
GO:0060828	GO:0060828	regulation of canonical Wnt signaling pathway	27/975	190/12280	0.00218236	0.0319253	0.0260375	HECW1/DVL2/MKS1/BAMBI/FGF9/GLI3/TLE4/GLI1/APC2/ZBED3/NKD2/DAAM2/RSPO2/PTPRO/DAB2/FZD7/FRAT1/SMAD3/AXIN2/ROR2/MCC/MLLT3/JUP/DDIT3/LRRK2/LGR4/TMEM170B	27
GO:0010565	GO:0010565	regulation of cellular ketone metabolic process	16/975	92/12280	0.00223496	0.0325949	0.0265835	PDK4/PDK2/NR1H3/SREBF1/ACACB/SIRT4/TRIB3/PPARGC1A/BMP5/TWIST1/NR1D1/PPARG/SLC7A11/ATCAY/IRS1/MALRD1	16
GO:0001649	GO:0001649	osteoblast differentiation	25/975	172/12280	0.00229148	0.0331392	0.0270275	HGF/RASSF2/FGF9/HOXA2/GLI3/GLI1/MSX2/TWIST1/RUNX2/BMP4/SMO/JUND/RSPO2/IL6R/HAND2/SMAD3/AXIN2/SMAD1/FAM20C/PRKD1/PTCH1/SEMA4D/NBR1/LGR4/GDF10	25
GO:0051090	GO:0051090	regulation of DNA-binding transcription factor activity	40/975	317/12280	0.00229158	0.0331392	0.0270275	DVL2/CX3CL1/CD200/RGCC/WNT2/PPARGC1A/CTH/MXI1/MSX2/TNFSF18/TWIST1/SMO/FOXA1/PPARG/TRIM5/PIM1/ARRB1/MAP2K5/CYP1B1/ARID5B/SAV1/JMY/CEBPG/KIT/HAND2/TLR3/SMAD3/AR/JUP/TLR6/FZD4/DDIT3/FZD2/RNF41/TCEAL7/CAMK1D/PRKD1/ROR1/PTCH1/RAB7B	40
GO:0030111	GO:0030111	regulation of Wnt signaling pathway	33/975	248/12280	0.00229549	0.0331392	0.0270275	HECW1/DVL2/MKS1/ZRANB1/BAMBI/NFATC4/FGF9/GLI3/TLE4/GLI1/APC2/ZBED3/NKD2/DAAM2/RSPO2/PTPRO/HHEX/DAB2/APCDD1/FZD7/DISC1/FRAT1/SMAD3/NXN/AXIN2/ROR2/MCC/MLLT3/JUP/DDIT3/LRRK2/LGR4/TMEM170B	33
GO:0043266	GO:0043266	regulation of potassium ion transport	12/975	60/12280	0.00232507	0.0331392	0.0270275	NEDD4L/KCNH2/KCNAB2/KCNN2/KLHL24/ATF4/ANK2/AKAP6/KCNE4/KCNE3/AMIGO1/DRD1	12
GO:0010464	GO:0010464	regulation of mesenchymal cell proliferation	8/975	31/12280	0.00232541	0.0331392	0.0270275	FGF9/WNT2/STAT1/BMP4/SIX1/FOXP2/SMO/NFIB	8
GO:0015807	GO:0015807	L-amino acid transport	10/975	45/12280	0.00233759	0.0331392	0.0270275	ATP1A2/SLC1A2/SLC38A1/SLC1A4/RGS2/SLC7A11/SLC1A7/SLC43A2/SLC6A9/SLC25A29	10
GO:0051195	GO:0051195	negative regulation of cofactor metabolic process	5/975	13/12280	0.00234177	0.0331392	0.0270275	FYN/HDAC6/PPARGC1A/MPV17L/DDIT4	5
GO:0060231	GO:0060231	mesenchymal to epithelial transition	5/975	13/12280	0.00234177	0.0331392	0.0270275	GATA3/STAT1/BMP4/SMO/FZD7	5
GO:0060479	GO:0060479	lung cell differentiation	5/975	13/12280	0.00234177	0.0331392	0.0270275	HOXA5/FOXA1/GATA6/NFIB/SAV1	5
GO:0070986	GO:0070986	left/right axis specification	5/975	13/12280	0.00234177	0.0331392	0.0270275	SMO/SETDB2/IFT172/MNS1/CITED2	5
GO:0030282	GO:0030282	bone mineralization	14/975	76/12280	0.00237153	0.0333694	0.0272152	P2RX7/TWIST1/BMP4/OSR1/RSPO2/PKDCC/CCR1/OSR2/SMAD3/AXIN2/ROR2/FAM20C/NBR1/LGR4	14
GO:0001736	GO:0001736	establishment of planar polarity	13/975	68/12280	0.00237903	0.0333694	0.0272152	DVL2/MKS1/GPC4/PARD6A/FOXF2/ASTN2/DAB2/FZD7/ROR2/MLLT3/FZD4/FZD2/ROR1	13
GO:0007164	GO:0007164	establishment of tissue polarity	13/975	68/12280	0.00237903	0.0333694	0.0272152	DVL2/MKS1/GPC4/PARD6A/FOXF2/ASTN2/DAB2/FZD7/ROR2/MLLT3/FZD4/FZD2/ROR1	13
GO:0086002	GO:0086002	cardiac muscle cell action potential involved in contraction	9/975	38/12280	0.00240268	0.0336022	0.0274051	NEDD4L/KCNH2/KCNN2/ANK2/SCN2B/KCNE4/KCND3/JUP/KCNE3	9
GO:0033865	GO:0033865	nucleoside bisphosphate metabolic process	18/975	110/12280	0.00247914	0.0343692	0.0280307	PDK4/CROT/PDK2/ACACB/SCD/MVK/HMGCS1/HMGCR/ACSS2/NUDT7/SLC26A1/TDO2/PANK1/ACSS1/MVD/PIPOX/ELOVL2/SULT1C4	18
GO:0033875	GO:0033875	ribonucleoside bisphosphate metabolic process	18/975	110/12280	0.00247914	0.0343692	0.0280307	PDK4/CROT/PDK2/ACACB/SCD/MVK/HMGCS1/HMGCR/ACSS2/NUDT7/SLC26A1/TDO2/PANK1/ACSS1/MVD/PIPOX/ELOVL2/SULT1C4	18
GO:0034032	GO:0034032	purine nucleoside bisphosphate metabolic process	18/975	110/12280	0.00247914	0.0343692	0.0280307	PDK4/CROT/PDK2/ACACB/SCD/MVK/HMGCS1/HMGCR/ACSS2/NUDT7/SLC26A1/TDO2/PANK1/ACSS1/MVD/PIPOX/ELOVL2/SULT1C4	18
GO:0031347	GO:0031347	regulation of defense response	53/975	452/12280	0.00256848	0.0353187	0.028805	CX3CL1/FYN/HGF/NR1H3/C6/CALCRL/ALPK1/CD200/MAP3K1/C5/GATA3/DHX58/MAP2K6/MVK/ULBP1/IFIH1/STAT1/NMI/IRF1/NR1D1/LDLR/PPARG/TRIM5/DDX60/PARP9/HERC5/TIFA/TSLP/PDCD4/CD96/IFI16/DTX3L/HMGB2/TLR3/GPER1/SMAD3/SIN3A/ADORA2B/SERPINB9/C3AR1/PARP14/TLR1/TLR6/IL20RB/NR1D2/USP18/SOCS1/IFIT1/CARD9/PLSCR1/LRRK2/LGR4/RAB7B	53
GO:0051145	GO:0051145	smooth muscle cell differentiation	11/975	53/12280	0.00256984	0.0353187	0.028805	PRDM6/NFATC4/FGF9/CTH/BMP4/SIX1/GATA6/ADM/PDCD4/KIT/GPER1	11
GO:0060071	GO:0060071	Wnt signaling pathway, planar cell polarity pathway	11/975	53/12280	0.00256984	0.0353187	0.028805	DVL2/MKS1/GPC4/PARD6A/DAB2/FZD7/ROR2/MLLT3/FZD4/FZD2/ROR1	11
GO:0021517	GO:0021517	ventral spinal cord development	7/975	25/12280	0.00262258	0.0357345	0.0291441	GLI3/LHX4/ZC4H2/IFT172/VLDLR/ISL2/PTCH1	7
GO:0035886	GO:0035886	vascular smooth muscle cell differentiation	7/975	25/12280	0.00262258	0.0357345	0.0291441	FGF9/CTH/GATA6/ADM/PDCD4/KIT/GPER1	7
GO:0086005	GO:0086005	ventricular cardiac muscle cell action potential	7/975	25/12280	0.00262258	0.0357345	0.0291441	NEDD4L/KCNH2/ANK2/KCNE4/KCND3/JUP/KCNE3	7
GO:0002695	GO:0002695	negative regulation of leukocyte activation	17/975	102/12280	0.0026459	0.0359495	0.0293195	CX3CL1/NR1H3/CD200/JAK3/GLI3/RIPOR2/IRF1/BMP4/LDLR/HLX/PDE5A/MERTK/TNFRSF14/GPER1/INPP5D/IL20RB/SOCS1	17
GO:1901605	GO:1901605	alpha-amino acid metabolic process	25/975	174/12280	0.00268681	0.0364017	0.0296883	ASNS/MCCC1/SIRT4/ACCS/ALDH5A1/CTH/ALDH6A1/GNMT/PSAT1/AZIN2/HMGCLL1/PSPH/HNMT/SLC7A11/TDO2/HPD/CBS/FTCD/HAAO/GPT2/ATCAY/PIPOX/DDO/HOGA1/CBSL	25
GO:0006954	GO:0006954	inflammatory response	50/975	422/12280	0.00271125	0.0364148	0.029699	CYP26B1/CX3CL1/HGF/NR1H3/C6/CALCRL/P2RX7/CD200/NFATC4/C5/GATA3/MVK/NFE2L2/NMI/APOL3/APOL2/SMO/LDLR/PPARG/MYLK3/TSLP/PDCD4/CD96/KIT/IL6R/VCAM1/IFI16/CCR1/HMGB2/TLR3/GPER1/SMAD3/PXK/BDKRB2/AFAP1L2/SMAD1/ADORA2B/C3AR1/CCL11/TLR1/TLR6/IL20RB/NR1D2/CAMK1D/PRKD1/USP18/MAPT/PLSCR1/LRRK2/PLA2G4B	50
GO:0009954	GO:0009954	proximal/distal pattern formation	6/975	19/12280	0.00271832	0.0364148	0.029699	CYP26B1/GLI3/GLI1/ALDH1A2/OSR1/PBX1	6
GO:0140115	GO:0140115	export across plasma membrane	6/975	19/12280	0.00271832	0.0364148	0.029699	ATP1A2/KCNH2/SLC40A1/KCNE4/KCND3/KCNE3	6
GO:1901522	GO:1901522	positive regulation of transcription from RNA polymerase II promoter involved in cellular response to chemical stimulus	6/975	19/12280	0.00271832	0.0364148	0.029699	NFE2L2/CHD6/RUNX2/ATF4/CARF/SMAD1	6
GO:0048660	GO:0048660	regulation of smooth muscle cell proliferation	18/975	111/12280	0.00274523	0.0366017	0.0298514	CX3CL1/CALCRL/FGF9/NDRG4/OGN/PPARGC1A/CDKN1B/HMGCR/PDE1A/STAT1/BMP4/PPARG/SKP2/PDCD4/IL6R/GPER1/MAP3K5/MIR503	18
GO:0051607	GO:0051607	defense response to virus	24/975	165/12280	0.00274762	0.0366017	0.0298514	DHX58/OAS2/IFIH1/STAT1/IFIT3/IFIT2/IRF1/TRIM5/DDX60/PARP9/HERC5/SKP2/IFI16/DTX3L/TLR3/DDIT4/IRF2/SIN3A/BCL2/MX2/IFIT1/CARD9/PLSCR1/APOBEC3D	24
GO:0072171	GO:0072171	mesonephric tubule morphogenesis	10/975	46/12280	0.00277864	0.0369118	0.0301043	GLI3/GATA3/BMP4/SIX1/SMO/OSR1/BCL2/PBX1/PTCH1/LGR4	10
GO:0016331	GO:0016331	morphogenesis of embryonic epithelium	19/975	120/12280	0.00280851	0.037205	0.0303434	DVL2/MKS1/CC2D2A/TULP3/TGFB2/WNT2/GATA3/BMP5/TWIST1/BMP4/SIX1/ALDH1A2/IFT172/OSR1/ADM/ARHGAP35/AR/FZD2/PTCH1	19
GO:0003205	GO:0003205	cardiac chamber development	20/975	129/12280	0.00284078	0.0374245	0.0305225	MKS1/FOXC1/TGFBR3/TBX5/TGFB2/WNT2/TGFBR1/GATA3/BMP5/MSX2/BMP4/SMO/GATA6/ANK2/SAV1/DHRS3/HAND2/CITED2/HEG1/FZD2	20
GO:0006813	GO:0006813	potassium ion transport	20/975	129/12280	0.00284078	0.0374245	0.0305225	ATP1A2/NEDD4L/KCNH2/KCNAB2/KCNN2/KLHL24/ATF4/SNAP25/ANK2/AKAP6/KCNE4/KCNJ6/KCNB1/KCND3/KCNE3/KCNG2/AMIGO1/KCND2/DRD1/SLC12A8	20
GO:0048546	GO:0048546	digestive tract morphogenesis	8/975	32/12280	0.00288841	0.0379472	0.0309488	GLI3/GLI1/BMP4/PDGFRA/HLX/SMAD3/BCL2/EPHB3	8
GO:0009409	GO:0009409	response to cold	9/975	39/12280	0.00290756	0.0379894	0.0309832	TRPA1/PPARGC1A/PPARG/GMPR/PLAC8/ADM/SLC25A27/TMEM135/UCP2	9
GO:0097755	GO:0097755	positive regulation of blood vessel diameter	9/975	39/12280	0.00290756	0.0379894	0.0309832	RGS2/BBS2/ADM/GUCY1A1/GPER1/BDKRB2/ADORA2B/PLA2G6/DRD1	9
GO:0035567	GO:0035567	non-canonical Wnt signaling pathway	15/975	86/12280	0.00294011	0.0383097	0.0312444	DVL2/MKS1/GPC4/GNAO1/TNRC6B/PARD6A/DAAM2/DAB2/FZD7/ROR2/MLLT3/FZD4/FZD2/ROR1/GNG2	15
GO:0044106	GO:0044106	cellular amine metabolic process	11/975	54/12280	0.00300072	0.038887	0.0317152	SIRT4/DMGDH/AZIN2/HNMT/SLC7A11/TDO2/HAAO/ATCAY/GPR37/DRD1/MAOA	11
GO:0072088	GO:0072088	nephron epithelium morphogenesis	11/975	54/12280	0.00300072	0.038887	0.0317152	GLI3/GATA3/STAT1/BMP4/SIX1/SMO/OSR1/BCL2/PBX1/PTCH1/LGR4	11
GO:0042471	GO:0042471	ear morphogenesis	14/975	78/12280	0.00304684	0.0393163	0.0320654	DVL2/MYO15A/FGF9/HOXA2/GATA3/RIPOR2/TWIST1/SIX1/LRIG3/OSR1/OSR2/ROR2/FZD2/SLITRK6	14
GO:0007411	GO:0007411	axon guidance	28/975	204/12280	0.00305033	0.0393163	0.0320654	FYN/NTN4/DPYSL2/HOXA2/GLI3/GATA3/GAB1/LHX4/SMO/EPHA7/TUBB2B/SEMA6C/EFNA3/BOC/VLDLR/NFIB/PTPRO/SEMA3D/KIF5A/ISL2/ARHGAP35/EFNA1/NRTN/EPHB3/EFNA5/PTCH1/SLIT1/SEMA4D	28
GO:1901606	GO:1901606	alpha-amino acid catabolic process	13/975	70/12280	0.00310696	0.0399182	0.0325562	MCCC1/ALDH6A1/HMGCLL1/HNMT/TDO2/HPD/CBS/FTCD/HAAO/GPT2/PIPOX/DDO/HOGA1	13
GO:0050731	GO:0050731	positive regulation of peptidyl-tyrosine phosphorylation	20/975	130/12280	0.00311377	0.0399182	0.0325562	DVL2/FYN/HGF/ERBB3/CASS4/THBS4/TNFSF18/PARP9/TP53/TSLP/CTF1/ANGPT1/KIT/TNFRSF14/IL6R/AFAP1L2/EFNA1/PARP14/EFNA5/SEMA4D	20
GO:0006874	GO:0006874	cellular calcium ion homeostasis	34/975	263/12280	0.00319746	0.0408812	0.0333417	TSPOAP1/CX3CL1/FYN/ATP1A2/TRPC5/P2RX7/TRPA1/STC2/OPRL1/ATF4/PDGFRA/HTR2B/PLCE1/GPR65/ANK2/ADM/ITPR1/AKAP6/TMEM178A/SLC25A27/SV2A/CCR1/GPER1/SMAD3/BDKRB2/ADRA1B/BCL2/C3AR1/CCL11/DDIT3/PLA2G6/DRD1/LPAR1/GPR20	34
GO:0032101	GO:0032101	regulation of response to external stimulus	57/975	499/12280	0.00323403	0.0412382	0.0336328	CX3CL1/HGF/NR1H3/C6/CALCRL/CD200/C5/GATA3/DHX58/MVK/RIPOR2/SASH1/HMGCR/THBS4/STAT1/NFE2L2/BBS2/MTUS1/LDLR/PPARG/TRIM5/PDGFRA/TUBB2B/DDX60/MSTN/PARP9/HERC5/SEMA6C/TSLP/PDCD4/PTPRO/SEMA3D/IL6R/CCR1/DTX3L/TLR3/GPER1/VEGFD/SMAD3/SIN3A/ADORA2B/C3AR1/IL16/CD34/TLR6/IL20RB/NR1D2/RGMA/CAMK1D/PRKD1/DRD1/USP18/IFIT1/SEMA4D/LRRK2/LPAR1/MMP28	57
GO:0006644	GO:0006644	phospholipid metabolic process	44/975	364/12280	0.00326988	0.0414287	0.0337882	FYN/HGF/ERBB3/IDI1/PLD1/FDFT1/PIK3IP1/MTMR3/PNPLA3/FGF9/GAB1/MVK/ALDH5A1/HMGCS1/PLCD4/PIK3R3/PLPPR5/PLPPR4/LDLR/PIK3C2B/LPIN1/PDGFRA/HTR2B/IDH1/IMPA2/GATA6/KIT/IP6K3/PTPN13/LIPH/ENPP6/LIPC/MVD/PROCA1/INPP5D/IRS1/MBOAT1/PRKD1/PLA2G6/INPP5J/SOCS1/PLSCR1/INPP5B/PLA2G4B	44
GO:0097485	GO:0097485	neuron projection guidance	28/975	205/12280	0.00327352	0.0414287	0.0337882	FYN/NTN4/DPYSL2/HOXA2/GLI3/GATA3/GAB1/LHX4/SMO/EPHA7/TUBB2B/SEMA6C/EFNA3/BOC/VLDLR/NFIB/PTPRO/SEMA3D/KIF5A/ISL2/ARHGAP35/EFNA1/NRTN/EPHB3/EFNA5/PTCH1/SLIT1/SEMA4D	28
GO:0060393	GO:0060393	regulation of pathway-restricted SMAD protein phosphorylation	10/975	47/12280	0.00328372	0.0414287	0.0337882	TGFB2/TGFBR1/BMP5/BMP4/GDF5/MSTN/INHBE/DAB2/GDF6/GDF10	10
GO:0086003	GO:0086003	cardiac muscle cell contraction	10/975	47/12280	0.00328372	0.0414287	0.0337882	ATP1A2/NEDD4L/KCNH2/KCNN2/ANK2/SCN2B/KCNE4/KCND3/JUP/KCNE3	10
GO:0009063	GO:0009063	cellular amino acid catabolic process	15/975	87/12280	0.00329853	0.0415058	0.0338511	MCCC1/ALDH5A1/CTH/ALDH6A1/HMGCLL1/HNMT/TDO2/HPD/CBS/FTCD/HAAO/GPT2/PIPOX/DDO/HOGA1	15
GO:0021953	GO:0021953	central nervous system neuron differentiation	18/975	113/12280	0.0033492	0.0419222	0.0341906	TULP3/WNT2/GLI3/LHX4/ZC4H2/SMO/FAIM2/IFT172/NFIB/BTG2/ISL2/ARHGAP35/KNDC1/EPHB3/DRD1/PTCH1/MAPT/LDB1	18
GO:0048659	GO:0048659	smooth muscle cell proliferation	18/975	113/12280	0.0033492	0.0419222	0.0341906	CX3CL1/CALCRL/FGF9/NDRG4/OGN/PPARGC1A/CDKN1B/HMGCR/PDE1A/STAT1/BMP4/PPARG/SKP2/PDCD4/IL6R/GPER1/MAP3K5/MIR503	18
GO:0035458	GO:0035458	cellular response to interferon-beta	5/975	14/12280	0.0034068	0.0420908	0.0343281	STAT1/IFIT3/IRF1/TLR3/IFIT1	5
GO:0060831	GO:0060831	smoothened signaling pathway involved in dorsal/ventral neural tube patterning	5/975	14/12280	0.0034068	0.0420908	0.0343281	MKS1/TULP3/GLI3/TBC1D32/PTCH1	5
GO:0061323	GO:0061323	cell proliferation involved in heart morphogenesis	5/975	14/12280	0.0034068	0.0420908	0.0343281	TBX5/BMP4/SIX1/PIM1/HAND2	5
GO:0071371	GO:0071371	cellular response to gonadotropin stimulus	5/975	14/12280	0.0034068	0.0420908	0.0343281	PPARGC1A/HMGCS1/LHCGR/GATA6/EFNA5	5
GO:0072010	GO:0072010	glomerular epithelium development	5/975	14/12280	0.0034068	0.0420908	0.0343281	FOXC1/BMP4/PTPRO/KLF15/CD34	5
GO:0035150	GO:0035150	regulation of tube size	14/975	79/12280	0.0034393	0.0422732	0.034477	ATP1A2/FOXC1/HMGCR/RGS2/BBS2/HTR2B/ADM/GUCY1A1/GPER1/BDKRB2/ADRA1B/ADORA2B/PLA2G6/DRD1	14
GO:0050880	GO:0050880	regulation of blood vessel size	14/975	79/12280	0.0034393	0.0422732	0.034477	ATP1A2/FOXC1/HMGCR/RGS2/BBS2/HTR2B/ADM/GUCY1A1/GPER1/BDKRB2/ADRA1B/ADORA2B/PLA2G6/DRD1	14
GO:0043271	GO:0043271	negative regulation of ion transport	16/975	96/12280	0.00348448	0.0423242	0.0345186	HECW1/ATP1A2/NEDD4L/KCNH2/GNAO1/RGS2/TWIST1/OPRL1/ATF4/OSR1/KCNE4/PACSIN3/PXK/TCAF2/BCL2/KCNE3	16
GO:0030279	GO:0030279	negative regulation of ossification	11/975	55/12280	0.00348782	0.0423242	0.0345186	HOXA2/TWIST1/CCR1/HAND2/SMAD3/AXIN2/BCL2/PTCH1/SEMA4D/NBR1/GDF10	11
GO:0046717	GO:0046717	acid secretion	11/975	55/12280	0.00348782	0.0423242	0.0345186	P2RX7/MAP2K6/SLC1A2/OPRL1/SLC38A2/SV2A/SLC1A7/PROCA1/BDKRB2/PLA2G6/SLC6A9	11
GO:0072028	GO:0072028	nephron morphogenesis	11/975	55/12280	0.00348782	0.0423242	0.0345186	GLI3/GATA3/STAT1/BMP4/SIX1/SMO/OSR1/BCL2/PBX1/PTCH1/LGR4	11
GO:0090175	GO:0090175	regulation of establishment of planar polarity	11/975	55/12280	0.00348782	0.0423242	0.0345186	DVL2/MKS1/GPC4/PARD6A/DAB2/FZD7/ROR2/MLLT3/FZD4/FZD2/ROR1	11
GO:0035850	GO:0035850	epithelial cell differentiation involved in kidney development	8/975	33/12280	0.00355216	0.0429956	0.0350661	GATA3/STAT1/BMP4/SMO/OSR1/PTPRO/KLF15/CD34	8
GO:0050900	GO:0050900	leukocyte migration	33/975	255/12280	0.00358607	0.0432961	0.0353112	CX3CL1/FYN/CD200/TGFB2/MADCAM1/C5/GATA3/RIPOR2/BMP5/THBS4/TNFSF18/HOXA7/MTUS1/CH25H/MSTN/SLC7A11/PTPRO/MERTK/ANGPT1/KIT/TNFRSF14/IL6R/VCAM1/CCR1/VEGFD/INPP5D/ROR2/C3AR1/CCL11/IL16/CD34/CAMK1D/MMP28	33
GO:0030177	GO:0030177	positive regulation of Wnt signaling pathway	17/975	105/12280	0.00361238	0.043447	0.0354343	ZRANB1/BAMBI/FGF9/ZBED3/DAAM2/RSPO2/HHEX/DAB2/DISC1/FRAT1/SMAD3/AXIN2/ROR2/MLLT3/JUP/LRRK2/LGR4	17
GO:0060330	GO:0060330	regulation of response to interferon-gamma	6/975	20/12280	0.0036259	0.043447	0.0354343	NR1H3/STAT1/PPARG/PARP9/PARP14/SOCS1	6
GO:0060334	GO:0060334	regulation of interferon-gamma-mediated signaling pathway	6/975	20/12280	0.0036259	0.043447	0.0354343	NR1H3/STAT1/PPARG/PARP9/PARP14/SOCS1	6
GO:0097529	GO:0097529	myeloid leukocyte migration	18/975	114/12280	0.00369024	0.0440825	0.0359526	CX3CL1/CD200/TGFB2/C5/RIPOR2/THBS4/MTUS1/MSTN/PTPRO/KIT/IL6R/CCR1/VEGFD/ROR2/C3AR1/CCL11/CAMK1D/MMP28	18
GO:0002790	GO:0002790	peptide secretion	46/975	387/12280	0.00369742	0.0440825	0.0359526	CFTR/CX3CL1/NR1H3/BTN3A1/SREBF1/P2RX7/SIRT4/CD200/TGFB2/RGCC/C5/GATA3/EXPH5/HMGCR/IFIH1/SLC2A1/TWIST1/NR1D1/SNAP25/HTR2B/ARRB1/CASP1/SIRT3/TSLP/ITPR1/ANGPT1/RAB11FIP1/TNFRSF14/KCNB1/GPER1/OR51E2/IRS1/CD34/TLR1/TLR6/UCP2/KCNG2/EFNA5/PLA2G6/SOCS1/LRRK2/MBP/SCAMP5/LGR4/CTAGE1/NOX5	46
GO:0007368	GO:0007368	determination of left/right symmetry	14/975	80/12280	0.00387206	0.0460495	0.0375568	MKS1/DNAH5/CC2D2A/IFT74/NDRG4/SMO/SETDB2/IFT172/DAAM2/TBC1D32/HAND2/CITED2/SMAD3/IFT140	14
GO:0001889	GO:0001889	liver development	17/975	106/12280	0.00399294	0.047369	0.0386329	HGF/TGFBR3/ASNS/PCK2/DBP/GLI3/GLI1/HMGCS1/ALDH1A2/HLX/GATA6/ARID5B/CEBPG/CITED2/SMAD3/UCP2/PTCH1	17
GO:1902882	GO:1902882	regulation of response to oxidative stress	13/975	72/12280	0.00400667	0.047414	0.0386696	FYN/HGF/SESN1/HDAC6/NCOA7/NFE2L2/ATF4/SESN3/SLC7A11/ACOX2/GPR37/TLR6/LRRK2	13
GO:0043647	GO:0043647	inositol phosphate metabolic process	11/975	56/12280	0.00403623	0.0475942	0.0388166	PLCD4/ITPKA/LHCGR/PLCE1/IMPA2/ITPKB/IP6K3/GPER1/INPP5D/INPP5J/INPP5B	11
GO:0019221	GO:0019221	cytokine-mediated signaling pathway	55/975	483/12280	0.00404187	0.0475942	0.0388166	CX3CL1/FYN/HGF/NR1H3/FOXC1/MID1/JAK3/GATA3/OAS2/LIFR/STAT1/RHOU/IFIT3/IFIT2/TNFSF18/TWIST1/NMI/BBS2/IRF1/TNFRSF19/PPARG/TRIM5/XAF1/PIM1/CASP1/STAT4/PARP9/PELI2/TP53/TSLP/CTF1/PDCD4/ANGPT1/KIT/TNFRSF14/IL6R/VCAM1/CCR1/CREBRF/IRF2/INPP5D/IRS1/BCL2/CCL11/IL16/PARP14/IL20RB/MX2/USP18/SOCS1/IFIT1/MAOA/CEBPD/HIST1H3G/HIST1H3E	55
GO:0022612	GO:0022612	gland morphogenesis	15/975	89/12280	0.00412321	0.0481951	0.0393066	HGF/NTN4/TGFB2/GLI3/GLI1/MSX2/BMP4/FOXA1/NFIB/AR/BCL2/CCL11/PLAG1/PTCH1/ETV5	15
GO:1903825	GO:1903825	organic acid transmembrane transport	15/975	89/12280	0.00412321	0.0481951	0.0393066	ATP1A2/ACACB/SLC1A2/SLC38A1/SLC1A4/RGS2/SLC38A2/SLC38A4/OSR1/SLC7A11/SLC16A12/SLC1A7/SLC43A2/SLC6A9/SLC25A29	15
GO:1905039	GO:1905039	carboxylic acid transmembrane transport	15/975	89/12280	0.00412321	0.0481951	0.0393066	ATP1A2/ACACB/SLC1A2/SLC38A1/SLC1A4/RGS2/SLC38A2/SLC38A4/OSR1/SLC7A11/SLC16A12/SLC1A7/SLC43A2/SLC6A9/SLC25A29	15
GO:0045599	GO:0045599	negative regulation of fat cell differentiation	9/975	41/12280	0.00416619	0.0485784	0.0396193	RUNX1T1/TRIB3/GATA3/MSX2/ZFP36L2/GPER1/SMAD3/DDIT3/CCDC85B	9
GO:0006584	GO:0006584	catecholamine metabolic process	7/975	27/12280	0.00421361	0.0488922	0.0398752	TGFB2/GATA3/HAND2/GPR37/LRTOMT/DRD1/MAOA	7
GO:0009712	GO:0009712	catechol-containing compound metabolic process	7/975	27/12280	0.00421361	0.0488922	0.0398752	TGFB2/GATA3/HAND2/GPR37/LRTOMT/DRD1/MAOA	7
GO:0055074	GO:0055074	calcium ion homeostasis	34/975	268/12280	0.00431869	0.0498567	0.0406618	TSPOAP1/CX3CL1/FYN/ATP1A2/TRPC5/P2RX7/TRPA1/STC2/OPRL1/ATF4/PDGFRA/HTR2B/PLCE1/GPR65/ANK2/ADM/ITPR1/AKAP6/TMEM178A/SLC25A27/SV2A/CCR1/GPER1/SMAD3/BDKRB2/ADRA1B/BCL2/C3AR1/CCL11/DDIT3/PLA2G6/DRD1/LPAR1/GPR20	34
GO:0030850	GO:0030850	prostate gland development	8/975	34/12280	0.00432809	0.0498567	0.0406618	GLI3/GLI1/CDKN1B/BMP4/FOXA1/AR/PLAG1/PTCH1	8
GO:0045824	GO:0045824	negative regulation of innate immune response	8/975	34/12280	0.00432809	0.0498567	0.0406618	NR1H3/DHX58/NMI/PPARG/CD96/IFI16/SERPINB9/PARP14	8

## Sheet: GSEA_A_to_Q
	ID	Description	setSize	enrichmentScore	NES	pvalue	p.adjust	qvalues	rank	leading_edge	core_enrichment
GO:0006954	GO:0006954	inflammatory response	422	0.331399	1.36952	0.00158479	0.0490018	0.0428501	2135	tags=19%, list=12%, signal=17%	KLKB1/IL34/CAMK1D/MVK/TSLP/PTX3/PLA2G4C/RARRES2/BMP6/VCAM1/C7/CLU/GPR68/LDLR/CX3CL1/UNC13D/KLF4/CYP26B1/VNN1/IL31RA/HDAC9/CXCL8/P2RX7/TNFSF4/TLR1/MAPT/BST1/LIPA/NUPR1/FOS/C9/NLRP1/C5AR1/TLR6/CD96/SNCA/CXCL6/VTN/SLC7A2/SERPINF1/KIT/IL20RB/CXCL10/PDCD4/ASS1/CFB/C3/IL1A/PRDX5/LY96/RBPJ/CD200/BIRC3/SCN9A/CRHBP/FCER1G/ADAM8/TEK/C1S/CD46/LRP1/TNIP3/CXCL3/IL17D/C2/CD44/CALCRL/RELB/SERPING1/APOL3/RASGRP1…
GO:0099536	GO:0099536	synaptic signaling	452	0.368264	1.52871	0.00159236	0.0490018	0.0428501	2298	tags=21%, list=13%, signal=19%	GRIA1/SYT7/DOC2B/PHF24/KCNB1/SNCB/EGR2/PTPRN2/CX3CL1/P2RX6/HTR2B/ATP1A2/CAMK2B/P2RX7/ACHE/LRP8/PCDHB10/CALB2/PCDHB4/LYNX1/FGF14/DTNA/SEPT5/TUBB2B/PCDHB11/KCNMB4/PCDHB5/SYT1/SERPINE2/ADCY1/PCDHB14/DRD4/MAPT/NPTXR/NSG1/PCDHB9/PCDHB6/LRRTM2/ITPKA/NLGN3/RELN/PCDHB2/SLC6A9/SNCA/CACNG4/CUBN/KIT/BSN/NPTX1/LRRC4/GLRB/PRNP/CHRM2/NRXN2/GRIA3/PCDHB3/CRHBP/CACNB4/DGKI/NLGN1/PLA2G6/SLC1A4/CNIH3/PCDHB13/GRIK5/…
GO:0007268	GO:0007268	chemical synaptic transmission	441	0.375469	1.55752	0.00159744	0.0490018	0.0428501	2298	tags=22%, list=13%, signal=19%	GRIA1/SYT7/DOC2B/PHF24/KCNB1/SNCB/EGR2/PTPRN2/CX3CL1/P2RX6/HTR2B/ATP1A2/CAMK2B/P2RX7/ACHE/LRP8/PCDHB10/CALB2/PCDHB4/LYNX1/FGF14/DTNA/SEPT5/TUBB2B/PCDHB11/KCNMB4/PCDHB5/SYT1/SERPINE2/ADCY1/PCDHB14/DRD4/MAPT/NPTXR/NSG1/PCDHB9/PCDHB6/LRRTM2/ITPKA/NLGN3/RELN/PCDHB2/SLC6A9/SNCA/CACNG4/CUBN/KIT/BSN/NPTX1/LRRC4/GLRB/PRNP/CHRM2/NRXN2/GRIA3/PCDHB3/CRHBP/CACNB4/DGKI/NLGN1/PLA2G6/SLC1A4/CNIH3/PCDHB13/GRIK5/…
GO:0098916	GO:0098916	anterograde trans-synaptic signaling	441	0.375469	1.55752	0.00159744	0.0490018	0.0428501	2298	tags=22%, list=13%, signal=19%	GRIA1/SYT7/DOC2B/PHF24/KCNB1/SNCB/EGR2/PTPRN2/CX3CL1/P2RX6/HTR2B/ATP1A2/CAMK2B/P2RX7/ACHE/LRP8/PCDHB10/CALB2/PCDHB4/LYNX1/FGF14/DTNA/SEPT5/TUBB2B/PCDHB11/KCNMB4/PCDHB5/SYT1/SERPINE2/ADCY1/PCDHB14/DRD4/MAPT/NPTXR/NSG1/PCDHB9/PCDHB6/LRRTM2/ITPKA/NLGN3/RELN/PCDHB2/SLC6A9/SNCA/CACNG4/CUBN/KIT/BSN/NPTX1/LRRC4/GLRB/PRNP/CHRM2/NRXN2/GRIA3/PCDHB3/CRHBP/CACNB4/DGKI/NLGN1/PLA2G6/SLC1A4/CNIH3/PCDHB13/GRIK5/…
GO:0099537	GO:0099537	trans-synaptic signaling	447	0.370757	1.53835	0.00159744	0.0490018	0.0428501	2298	tags=21%, list=13%, signal=19%	GRIA1/SYT7/DOC2B/PHF24/KCNB1/SNCB/EGR2/PTPRN2/CX3CL1/P2RX6/HTR2B/ATP1A2/CAMK2B/P2RX7/ACHE/LRP8/PCDHB10/CALB2/PCDHB4/LYNX1/FGF14/DTNA/SEPT5/TUBB2B/PCDHB11/KCNMB4/PCDHB5/SYT1/SERPINE2/ADCY1/PCDHB14/DRD4/MAPT/NPTXR/NSG1/PCDHB9/PCDHB6/LRRTM2/ITPKA/NLGN3/RELN/PCDHB2/SLC6A9/SNCA/CACNG4/CUBN/KIT/BSN/NPTX1/LRRC4/GLRB/PRNP/CHRM2/NRXN2/GRIA3/PCDHB3/CRHBP/CACNB4/DGKI/NLGN1/PLA2G6/SLC1A4/CNIH3/PCDHB13/GRIK5/…
GO:0032787	GO:0032787	monocarboxylic acid metabolic process	415	0.335858	1.38517	0.00161031	0.0490018	0.0428501	2977	tags=20%, list=17%, signal=17%	PLA2G3/FABP3/INSIG1/MSMO1/SCD/FADS2/PLA2G4C/ACAT2/STARD4/FADS1/LPIN1/PNPLA3/CYP26B1/VNN1/CYP1B1/ELOVL6/P2RX7/FASN/ALDH1A2/LIPC/IDH1/ALDOC/DCN/ACSS2/PDK4/ALDH1A3/RBP1/SNCA/PHGDH/TRIB3/IDUA/ACACA/KIT/HSD17B8/PCK2/ACSL3/CYP2D7/C3/ASNS/PFKFB4/ACLY/ELOVL3/HSD17B12/PFKFB2/ABAT/HAGH/PGD/THNSL2/GCKR/NUDT7/ACOX2/CRYL1/HKDC1/UST/GSTZ1/TIGAR/CSPG5/NR1D1/SLC27A6/ELOVL2/CYP4V2/ALDH5A1/MID1IP1/OGT/CYP27A1/SESN…
GO:0061564	GO:0061564	axon development	396	0.356301	1.46456	0.0016129	0.0490018	0.0428501	3849	tags=29%, list=22%, signal=23%	EPHA7/SHH/NTN1/NRXN3/SLITRK6/SEMA3D/EGR2/TRPC5/KLF4/GDF7/SEMA6A/CYFIP2/SEMA6D/TIAM1/SPTBN2/TUBB2B/PLXNC1/NOG/FGF13/ANOS1/PAK3/DRGX/KEL/RTN4R/CRMP1/ADCY1/MAPT/NLGN3/UNC5B/RELN/NR4A2/ETV1/BRSK2/CDH4/EFNA2/SEMA3B/NPTX1/FLRT3/GAB1/SEMA5A/DPYSL2/RGMA/NTRK2/SEMA6C/LHX4/RTN4/CELSR3/NGF/L1CAM/NEO1/CDKL3/MEGF8/OLFM1/FN1/NTN4/NCAM2/SLITRK5/RPS6KA5/APP/UST/UCHL1/PTPRM/EXT1/VANGL2/GRB10/VLDLR/GDNF/PLXNB3/SPO…
GO:0007610	GO:0007610	behavior	376	0.355769	1.45626	0.00163666	0.0490018	0.0428501	3058	tags=25%, list=17%, signal=21%	STRA6/GRIA1/HMGCR/DACH1/NRXN3/LDLR/SLITRK6/EGR2/ADCY5/HTR2B/ATP1A2/MUSK/C1QL1/PITX3/SPTBN2/FGF13/MYO15A/SERPINE2/ADCY1/DRD4/MAPT/GNAO1/SDK1/NLGN3/ALDH1A3/FOS/RELN/NR4A2/SNCA/ETV1/CREBRF/CUBN/ADM2/SERPINF1/KIT/GRPR/GLRB/PRNP/NRXN2/ARRDC3/GAA/BTG2/SCN9A/CRHBP/DGKI/SRPX2/NLGN1/PLA2G6/HIPK2/NTRK2/ABAT/SOBP/SLC1A2/OXTR/CSF2/NGF/FOXP2/LSAMP/KCND2/LGMN/MAPK8IP2/OPRL1/CLN8/GNG7/SLITRK5/GCNT4/ETV5/APP/UCH…
GO:0006644	GO:0006644	phospholipid metabolic process	364	0.395451	1.61202	0.00163934	0.0490018	0.0428501	1116	tags=10%, list=6%, signal=9%	PCSK9/PLA2G3/FABP3/LIPG/HMGCS1/IDI1/MVD/MVK/FDFT1/PLA2G4C/PLPPR5/FDPS/FGF9/PIK3IP1/LDLR/FADS1/LPIN1/HTR2B/KLF4/PNPLA3/PCYT2/ACHE/FGF17/FGF22/LIPC/IDH1/FGF18/SNCA/KIT/INPP5D/PIK3R3/ACSL3/GAB1/DBI/PDGFRA
GO:0051604	GO:0051604	protein maturation	248	0.407428	1.6099	0.00164204	0.0490018	0.0428501	1632	tags=15%, list=9%, signal=14%	PCSK9/SHH/KLKB1/PCSK1N/C7/CLU/PCSK2/CLEC3B/P2RX7/ASPRV1/CPE/SOX4/CYFIP2/NNAT/PRSS12/SERPINE2/PCSK4/BOLA2/C9/ADAMTS13/C5AR1/VTN/CFB/PRNP/C3/ACE/BIRC3/SCG5/ADAM8/NKD2/C1S/CD46/DISP1/NGF/C2/SERPING1/SORL1/LGMN
GO:0007409	GO:0007409	axonogenesis	361	0.382188	1.55511	0.00164745	0.0490018	0.0428501	3849	tags=31%, list=22%, signal=25%	EPHA7/SHH/NTN1/NRXN3/SLITRK6/SEMA3D/EGR2/TRPC5/GDF7/SEMA6A/CYFIP2/SEMA6D/TIAM1/SPTBN2/TUBB2B/PLXNC1/NOG/FGF13/ANOS1/PAK3/DRGX/KEL/RTN4R/CRMP1/ADCY1/MAPT/NLGN3/UNC5B/RELN/NR4A2/ETV1/BRSK2/CDH4/EFNA2/SEMA3B/NPTX1/FLRT3/GAB1/SEMA5A/DPYSL2/NTRK2/SEMA6C/LHX4/RTN4/CELSR3/NGF/L1CAM/NEO1/CDKL3/MEGF8/OLFM1/FN1/NTN4/SLITRK5/RPS6KA5/APP/UST/UCHL1/PTPRM/EXT1/VANGL2/GRB10/VLDLR/GDNF/PLXNB3/SPON2/SPTBN4/TCTN1/…
GO:1901615	GO:1901615	organic hydroxy compound metabolic process	354	0.45436	1.84696	0.00164745	0.0490018	0.0428501	2140	tags=22%, list=12%, signal=20%	PCSK9/HMGCS1/INSIG1/MSMO1/TM7SF2/SCD/HMGCR/SQLE/IDI1/SULT1C4/DHCR7/MVD/MVK/FDFT1/NPC1L1/HSD17B7/BMP6/ACAT2/FDPS/LSS/DHCR24/LDLR/SC5D/SNCB/CYP51A1/STARD4/ERG28/NSDHL/SREBF2/CYP26B1/EBP/CYP1B1/ELOVL6/FASN/ALDH1A2/FAXDC2/PSAT1/LIPC/ACSS2/DRD4/ITPKA/LIPA/ALDH1A3/NR4A2/SNCA/CUBN/ACACA/KIT/RDH11/INPP5D/PCK2/GCH1/ACLY/PLTP/PFKFB2/ABAT/PTH1R/HAGH/CPQ/SORL1/LGMN/ADH1C/ITPKB/ACOX2/MTMR7/PAX8/CLN8/ALDH1A1/L…
GO:0006631	GO:0006631	fatty acid metabolic process	263	0.384361	1.5265	0.00165017	0.0490018	0.0428501	1236	tags=11%, list=7%, signal=10%	PLA2G3/FABP3/INSIG1/MSMO1/SCD/FADS2/PLA2G4C/ACAT2/FADS1/LPIN1/PNPLA3/CYP1B1/ELOVL6/FASN/LIPC/ACSS2/PDK4/SNCA/TRIB3/ACACA/HSD17B8/PCK2/ACSL3/CYP2D7/C3/ACLY/ELOVL3/HSD17B12
GO:0010876	GO:0010876	lipid localization	263	0.389378	1.54642	0.00165017	0.0490018	0.0428501	2480	tags=19%, list=14%, signal=17%	PCSK9/PLA2G3/FABP3/LIPG/STRA6/SHH/SYT7/NPC1L1/BMP6/CLU/LDLR/STARD4/ABCA3/SREBF2/P2RX7/SPX/ABCA13/ABCC4/LIPC/MAP2K6/ABCA6/ABCA8/DRD4/ACACA/ACSL3/C3/MYB/ACE/PLTP/PSAP/PLA2G6/LRP1/MEST/OSBP2/SORL1/APOL3/ABCA2/CLN8/MSR1/DYSF/ABCA4/VLDLR/ESYT3/SLC27A6/NPC2/PROCA1/MID1IP1/PTCH1/ABCA7/SPNS1
GO:0006066	GO:0006066	alcohol metabolic process	260	0.489141	1.93822	0.00165563	0.0490018	0.0428501	1036	tags=17%, list=6%, signal=16%	PCSK9/HMGCS1/INSIG1/MSMO1/TM7SF2/SCD/HMGCR/SQLE/IDI1/SULT1C4/DHCR7/MVD/MVK/FDFT1/NPC1L1/HSD17B7/BMP6/ACAT2/FDPS/LSS/DHCR24/LDLR/SC5D/CYP51A1/ERG28/NSDHL/SREBF2/EBP/CYP1B1/ELOVL6/FASN/ALDH1A2/LIPC/ACSS2/ITPKA/ALDH1A3/SNCA/CUBN/ACACA/RDH11/INPP5D/PCK2/GCH1
GO:0019216	GO:0019216	regulation of lipid metabolic process	299	0.401765	1.61742	0.00166945	0.0490018	0.0428501	1317	tags=13%, list=7%, signal=13%	FABP3/HMGCS1/INSIG1/TM7SF2/SCD/HMGCR/SQLE/IDI1/DHCR7/MVD/MVK/FDFT1/RARRES2/BMP6/FDPS/LSS/PIK3IP1/LDLR/SC5D/CYP51A1/STARD4/FADS1/SREBF2/HTR2B/KLF4/ELOVL6/FASN/IDH1/PDK4/SNCA/TRIB3/ACACA/KIT/PIK3R3/ACSL3/C3/PDGFRA/PSAP/PLA2G6/TEK
GO:0050808	GO:0050808	synapse organization	290	0.452631	1.82115	0.00167224	0.0490018	0.0428501	2901	tags=28%, list=16%, signal=24%	EPHA7/NTN1/CNTN5/CBLN2/SLITRK6/SNCB/CX3CL1/MUSK/CAMK2B/ACHE/LRP8/PCDHB10/PCDHB4/C1QL1/TIAM1/SPTBN2/PCDHB11/RAB39B/PAK3/PCDHB5/PCDHB14/MAPT/PCDHB9/PCDHB6/LRRTM2/ITPKA/SDK1/NLGN3/RELN/PCDHB2/SNCA/TUBA1A/BSN/LRRC4/FLRT3/GLRB/PRNP/NRXN2/PCDHB3/COL4A5/CACNB4/SRPX2/NLGN1/MDGA1/PCDHB13/ARHGEF9/LZTS3/RAB17/NTRK2/CACNB1/PDZRN3/OXTR/GPC4/COLQ/L1CAM/FZD1/LGMN/ZNF365/SLITRK5/ETV5/APP/CTTNBP2/PALM/ADGRL1/NEUR…
GO:0010469	GO:0010469	regulation of signaling receptor activity	289	0.421205	1.69198	0.00168634	0.0490018	0.0428501	2128	tags=26%, list=12%, signal=24%	PCSK9/OGN/SHH/PTHLH/TNFSF18/IL34/GDF5/TSLP/BMP6/MSTN/FGF9/ADRA2C/TNFSF9/CX3CL1/IL32/INHBE/GDF7/CXCL8/GDF10/FGF17/SPX/KLHL24/PDGFD/GDF6/FGF22/TNFSF4/LYNX1/FGF14/IL16/UTS2B/NOG/FGF13/TNFSF15/VEGFD/FGF18/WNT9A/MAPT/NPTXR/GAS6/NLGN3/RELN/INHBB/NPPC/CXCL6/CACNG4/IL12A/ADM2/NPTX1/CXCL10/IL1A/CRHBP/CXCL16/NLGN1/CNIH3/JAG2/CXCL3/IL17D/KCNK3/GDF1/CSF2/CHGB/WNT2/THNSL2/NGF/LIF/GRN/MAPK8IP2/CTF1/FGF7/GPNMB/…
GO:0042391	GO:0042391	regulation of membrane potential	272	0.374521	1.48984	0.00169205	0.0490018	0.0428501	1776	tags=19%, list=10%, signal=17%	HCN4/GRIA1/KCNJ5/KCNB1/P2RX6/KCNJ2/TRPC5/PIEZO2/ATP1A2/KCNT2/P2RX7/FGF14/SLC26A1/KCNMB4/FGF13/DCN/SCN7A/DRD4/MAPT/ANK2/NLGN3/GLRX/KCND3/RELN/IFI6/SNCA/KCNH2/CACNG4/GLRB/GRIA3/SCN9A/CACNB4/DGKI/NLGN1/CNIH3/KCNH1/GRIK5/CACNA1G/ZACN/NTRK2/ABAT/SCN3B/INSYN1/USP53/SCN11A/EHD3/KCND2/HCN3/SCN2A/MAPK8IP2/RIMS3
GO:0062012	GO:0062012	regulation of small molecule metabolic process	276	0.408978	1.62836	0.00170358	0.0490018	0.0428501	1077	tags=12%, list=6%, signal=12%	FABP3/HMGCS1/INSIG1/TM7SF2/SCD/HMGCR/SQLE/IDI1/DHCR7/MVD/MVK/FDFT1/BMP6/FDPS/LSS/LDLR/SC5D/CYP51A1/STARD4/SREBF2/ELOVL6/P2RX7/FASN/FOXO1/SLC25A23/PDK4/SNCA/IGFBP5/GNMT/TRIB3/ACACA/KIT/SLC7A7/PFKFB4
GO:0008202	GO:0008202	steroid metabolic process	214	0.542776	2.1099	0.0017094	0.0490018	0.0428501	948	tags=19%, list=5%, signal=18%	PCSK9/HMGCS1/INSIG1/MSMO1/TM7SF2/SHH/SCD/HMGCR/SQLE/IDI1/DHCR7/MVD/MVK/FDFT1/NPC1L1/HSD17B7/BMP6/ACAT2/FDPS/LSS/DHCR24/LDLR/SC5D/CYP51A1/STARD4/ERG28/NSDHL/SREBF2/CYP26B1/EBP/CYP1B1/ELOVL6/FASN/FAXDC2/LIPC/LIPA/CUBN/TIPARP/ACACA/KIT/HSD17B8
GO:0007411	GO:0007411	axon guidance	204	0.418438	1.61659	0.00171233	0.0490018	0.0428501	3543	tags=32%, list=20%, signal=26%	EPHA7/SHH/NTN1/NRXN3/SEMA3D/EGR2/GDF7/SEMA6A/CYFIP2/SEMA6D/SPTBN2/TUBB2B/PLXNC1/NOG/ANOS1/DRGX/CRMP1/UNC5B/RELN/ETV1/CDH4/EFNA2/SEMA3B/FLRT3/GAB1/SEMA5A/DPYSL2/SEMA6C/LHX4/CELSR3/L1CAM/NEO1/MEGF8/NTN4/RPS6KA5/APP/PTPRM/EXT1/VANGL2/GRB10/VLDLR/GDNF/PLXNB3/SPON2/SPTBN4/SLIT2/PTCH1/PIK3R1/FYN/NECTIN1/DOK6/EFNA3/ROBO3/EVL/FRS2/SPTBN1/ZSWIM5/PTPRA/PRKCA/FEZ1/EFNB1/B4GAT1/PLXNA1/PIK3CA/EFNA4/SMO
GO:0006694	GO:0006694	steroid biosynthetic process	143	0.606106	2.25115	0.00171527	0.0490018	0.0428501	406	tags=20%, list=2%, signal=20%	HMGCS1/INSIG1/MSMO1/TM7SF2/SCD/HMGCR/SQLE/IDI1/DHCR7/MVD/MVK/FDFT1/NPC1L1/HSD17B7/BMP6/ACAT2/FDPS/LSS/DHCR24/SC5D/CYP51A1/STARD4/ERG28/NSDHL/SREBF2/EBP/ELOVL6/FASN/FAXDC2
GO:0006814	GO:0006814	sodium ion transport	130	0.454927	1.66551	0.00171527	0.0490018	0.0428501	2549	tags=25%, list=14%, signal=21%	PCSK9/HCN4/NKAIN1/ATP1A2/P2RX7/SLC9B1/KLHL24/ASIC3/FGF13/SERPINE2/SCN7A/DRD4/SLC9A9/GLRX/SCN9A/SCN3B/SCN11A/HECW1/PKD2/HCN3/SCN2A/SLC20A1/SLC24A1/SLC4A5/KLHL3/SLC23A2/SCN8A/SPTBN4/SLC28A3/SLC13A3/HECW2/CNKSR3
GO:0097485	GO:0097485	neuron projection guidance	205	0.41986	1.62354	0.00171527	0.0490018	0.0428501	3543	tags=33%, list=20%, signal=26%	EPHA7/SHH/NTN1/NRXN3/SEMA3D/EGR2/GDF7/SEMA6A/CYFIP2/SEMA6D/SPTBN2/TUBB2B/PLXNC1/NOG/ANOS1/DRGX/CRMP1/UNC5B/RELN/ETV1/CDH4/EFNA2/SEMA3B/FLRT3/GAB1/SEMA5A/DPYSL2/SEMA6C/LHX4/CELSR3/L1CAM/NEO1/MEGF8/NTN4/RPS6KA5/APP/PTPRM/EXT1/VANGL2/GRB10/VLDLR/GDNF/PLXNB3/SPON2/SPTBN4/SLIT2/PTCH1/PIK3R1/FYN/NECTIN1/DOK6/EFNA3/ROBO3/EVL/FRS2/SPTBN1/ZSWIM5/PTPRA/PRKCA/DPYSL4/FEZ1/EFNB1/B4GAT1/PLXNA1/PIK3CA/EFNA4/SMO
GO:0050803	GO:0050803	regulation of synapse structure or activity	163	0.466904	1.76261	0.00173611	0.0490018	0.0428501	2816	tags=26%, list=16%, signal=22%	EPHA7/NTN1/CBLN2/SLITRK6/MUSK/CAMK2B/LRP8/TIAM1/PAK3/LRRTM2/ITPKA/NLGN3/RELN/SNCA/TUBA1A/LRRC4/FLRT3/PRNP/SRPX2/NLGN1/MDGA1/ARHGEF9/LZTS3/RAB17/NTRK2/OXTR/GPC4/COLQ/FZD1/SLITRK5/ETV5/APP/CTTNBP2/ADGRL1/NEURL1/SYBU/ARHGAP22/LRRC24/ADGRB2/FYN/AMIGO1/LRFN5/NECTIN1
GO:0015850	GO:0015850	organic hydroxy compound transport	139	0.460999	1.70134	0.00173913	0.0490018	0.0428501	1487	tags=19%, list=8%, signal=17%	PCSK9/LIPG/STRA6/SHH/SYT7/KCNB1/NPC1L1/BMP6/CLU/LDLR/ADRA2C/STARD4/SREBF2/ASIC3/LIPC/SYT1/DRD4/SNCA/MYB/AQP1/PLTP/FCER1G/LRP1/ABAT/OXTR/OSBP2
GO:0046165	GO:0046165	alcohol biosynthetic process	125	0.609119	2.22345	0.00173913	0.0490018	0.0428501	1156	tags=26%, list=7%, signal=25%	HMGCS1/INSIG1/MSMO1/TM7SF2/SCD/HMGCR/SQLE/IDI1/DHCR7/MVD/MVK/FDFT1/NPC1L1/HSD17B7/BMP6/ACAT2/FDPS/LSS/DHCR24/SC5D/CYP51A1/ERG28/NSDHL/SREBF2/EBP/ELOVL6/FASN/ITPKA/SNCA/ACACA/PCK2/GCH1/ACLY
GO:0009612	GO:0009612	response to mechanical stimulus	154	0.429724	1.60374	0.0017452	0.0490018	0.0428501	1865	tags=24%, list=11%, signal=22%	STRA6/PHF24/GDF5/BMP6/SLITRK6/IGFBP2/TXNIP/KCNJ2/PIEZO2/ATP1A2/P2RX7/TRPA1/ASIC3/CLCN6/SERPINE2/DCN/PPL/FOS/JUND/ETV1/FOSB/KIT/CXCL10/NRXN2/ASNS/SOX9/AQP1/BTG2/POSTN/ANGPT2/USP53/SCX/FOXP2/PKD1L2/PKD2/TNFRSF8/PTGER4
GO:0016126	GO:0016126	sterol biosynthetic process	68	0.798587	2.66331	0.00174825	0.0490018	0.0428501	406	tags=40%, list=2%, signal=39%	HMGCS1/INSIG1/MSMO1/TM7SF2/SCD/HMGCR/SQLE/IDI1/DHCR7/MVD/MVK/FDFT1/NPC1L1/HSD17B7/ACAT2/FDPS/LSS/DHCR24/SC5D/CYP51A1/ERG28/NSDHL/SREBF2/EBP/ELOVL6/FASN/FAXDC2
GO:0016485	GO:0016485	protein processing	181	0.441509	1.68065	0.00174825	0.0490018	0.0428501	1632	tags=18%, list=9%, signal=17%	PCSK9/SHH/KLKB1/PCSK1N/C7/CLU/PCSK2/CLEC3B/P2RX7/ASPRV1/CPE/CYFIP2/PRSS12/SERPINE2/PCSK4/C9/ADAMTS13/C5AR1/VTN/CFB/PRNP/C3/ACE/BIRC3/SCG5/ADAM8/NKD2/C1S/CD46/NGF/C2/SERPING1/LGMN
GO:0050807	GO:0050807	regulation of synapse organization	157	0.477815	1.7874	0.00174825	0.0490018	0.0428501	2816	tags=27%, list=16%, signal=23%	EPHA7/NTN1/CBLN2/SLITRK6/MUSK/CAMK2B/LRP8/TIAM1/PAK3/LRRTM2/ITPKA/NLGN3/RELN/SNCA/TUBA1A/LRRC4/FLRT3/PRNP/SRPX2/NLGN1/MDGA1/ARHGEF9/LZTS3/RAB17/NTRK2/OXTR/GPC4/COLQ/FZD1/SLITRK5/ETV5/APP/CTTNBP2/ADGRL1/NEURL1/ARHGAP22/LRRC24/ADGRB2/FYN/AMIGO1/LRFN5/NECTIN1
GO:0046890	GO:0046890	regulation of lipid biosynthetic process	140	0.567892	2.09426	0.00175747	0.0490018	0.0428501	1029	tags=21%, list=6%, signal=20%	FABP3/HMGCS1/INSIG1/TM7SF2/SCD/HMGCR/SQLE/IDI1/DHCR7/MVD/MVK/FDFT1/BMP6/FDPS/LSS/LDLR/SC5D/CYP51A1/STARD4/SREBF2/HTR2B/ELOVL6/FASN/IDH1/PDK4/TRIB3/ACACA/ACSL3/C3
GO:1901617	GO:1901617	organic hydroxy compound biosynthetic process	180	0.534765	2.03129	0.00176056	0.0490018	0.0428501	1168	tags=21%, list=7%, signal=20%	HMGCS1/INSIG1/MSMO1/TM7SF2/SCD/HMGCR/SQLE/IDI1/DHCR7/MVD/MVK/FDFT1/NPC1L1/HSD17B7/BMP6/ACAT2/FDPS/LSS/DHCR24/SC5D/CYP51A1/STARD4/ERG28/NSDHL/SREBF2/EBP/ELOVL6/FASN/FAXDC2/PSAT1/ITPKA/NR4A2/SNCA/ACACA/PCK2/GCH1/ACLY/PLTP
GO:0050810	GO:0050810	regulation of steroid biosynthetic process	72	0.665588	2.23824	0.00176367	0.0490018	0.0428501	322	tags=28%, list=2%, signal=27%	HMGCS1/INSIG1/TM7SF2/SCD/HMGCR/SQLE/IDI1/DHCR7/MVD/MVK/FDFT1/BMP6/FDPS/LSS/SC5D/CYP51A1/STARD4/SREBF2/ELOVL6/FASN
GO:0051899	GO:0051899	membrane depolarization	64	0.529287	1.74236	0.00176367	0.0490018	0.0428501	1699	tags=25%, list=10%, signal=23%	HCN4/KCNJ2/ATP1A2/P2RX7/DCN/SCN7A/ANK2/IFI6/KCNH2/CACNG4/SCN9A/CACNB4/CACNA1G/SCN3B/SCN11A/SCN2A
GO:0051963	GO:0051963	regulation of synapse assembly	71	0.594304	1.99578	0.00176367	0.0490018	0.0428501	2816	tags=38%, list=16%, signal=32%	EPHA7/NTN1/CBLN2/SLITRK6/MUSK/LRRTM2/NLGN3/SNCA/FLRT3/SRPX2/NLGN1/MDGA1/ARHGEF9/RAB17/NTRK2/OXTR/GPC4/COLQ/FZD1/SLITRK5/APP/ADGRL1/LRRC24/ADGRB2/AMIGO1/LRFN5/NECTIN1
GO:0098742	GO:0098742	cell-cell adhesion via plasma-membrane adhesion molecules	168	0.530389	1.99904	0.00176367	0.0490018	0.0428501	2903	tags=40%, list=16%, signal=34%	CDHR1/FAT3/CLDN14/VCAM1/TENM4/CX3CL1/MMP24/KLF4/PCDHA6/PCDHB18P/PCDHB10/PCDHB4/PCDHA1/PCDHB11/PCDHB5/CADM1/PCDHB12/ARVCF/PCDHB14/PCDHB9/PCDHB6/SDK1/PCDHGB1/PCDHB7/DCHS1/PCDHB2/CDH4/CLDN6/PCDHA4/PCDHB15/LRRC4/FLRT3/PCDHB8/PCDH1/PCDHB3/CDHR3/PCDHGA10/PCDHGB3/CLDN1/NLGN1/MDGA1/PCDHB13/CD177/PCDHGB2/GPC4/CELSR3/L1CAM/PCDHGA7/PCDHGA1/PCDHGA3/CLDN11/PCDHGA5/PTPRM/ADGRL1/PCDHGB6/PLXNB3/PCDHGA4/CLDN16/CD…
GO:1902653	GO:1902653	secondary alcohol biosynthetic process	63	0.814535	2.67289	0.0017762	0.0490018	0.0428501	322	tags=41%, list=2%, signal=41%	HMGCS1/INSIG1/MSMO1/TM7SF2/SCD/HMGCR/SQLE/IDI1/DHCR7/MVD/MVK/FDFT1/NPC1L1/HSD17B7/ACAT2/FDPS/LSS/DHCR24/SC5D/CYP51A1/ERG28/NSDHL/SREBF2/EBP/ELOVL6/FASN
GO:0006639	GO:0006639	acylglycerol metabolic process	79	0.52981	1.807	0.00178253	0.0490018	0.0428501	1219	tags=13%, list=7%, signal=12%	PCSK9/FABP3/INSIG1/LDLR/LPIN1/PNPLA3/LIPC/PCK2/C3/DGKI
GO:0006720	GO:0006720	isoprenoid metabolic process	75	0.57146	1.93188	0.00178253	0.0490018	0.0428501	2296	tags=32%, list=13%, signal=28%	HMGCS1/STRA6/HMGCR/IDI1/MVD/MVK/FDFT1/RARRES2/FDPS/CYP26B1/CYP1B1/LRP8/ALDH1A2/ALDH1A3/RBP1/RDH11/LRP1/GPC4/ALDH1A1/RDH5/GGPS1/ABCA4/NPC2/CYP4V2
GO:0015918	GO:0015918	sterol transport	75	0.535283	1.80958	0.00178253	0.0490018	0.0428501	427	tags=13%, list=2%, signal=13%	PCSK9/LIPG/SHH/SYT7/NPC1L1/CLU/LDLR/STARD4/SREBF2/LIPC
GO:0030301	GO:0030301	cholesterol transport	65	0.559913	1.84796	0.00178253	0.0490018	0.0428501	427	tags=15%, list=2%, signal=15%	PCSK9/LIPG/SHH/SYT7/NPC1L1/CLU/LDLR/STARD4/SREBF2/LIPC
GO:0033865	GO:0033865	nucleoside bisphosphate metabolic process	110	0.51848	1.8531	0.00178253	0.0490018	0.0428501	1236	tags=20%, list=7%, signal=19%	HMGCS1/SCD/HMGCR/SULT1C4/MVD/MVK/ELOVL6/FASN/SLC26A1/ACSS2/PDK4/SNCA/PANK1/ACACA/ACSL3/DBI/PANK3/ACLY/PIPOX/SLC25A1/ELOVL3/HSD17B12
GO:0033875	GO:0033875	ribonucleoside bisphosphate metabolic process	110	0.51848	1.8531	0.00178253	0.0490018	0.0428501	1236	tags=20%, list=7%, signal=19%	HMGCS1/SCD/HMGCR/SULT1C4/MVD/MVK/ELOVL6/FASN/SLC26A1/ACSS2/PDK4/SNCA/PANK1/ACACA/ACSL3/DBI/PANK3/ACLY/PIPOX/SLC25A1/ELOVL3/HSD17B12
GO:0034032	GO:0034032	purine nucleoside bisphosphate metabolic process	110	0.51848	1.8531	0.00178253	0.0490018	0.0428501	1236	tags=20%, list=7%, signal=19%	HMGCS1/SCD/HMGCR/SULT1C4/MVD/MVK/ELOVL6/FASN/SLC26A1/ACSS2/PDK4/SNCA/PANK1/ACACA/ACSL3/DBI/PANK3/ACLY/PIPOX/SLC25A1/ELOVL3/HSD17B12
GO:0006695	GO:0006695	cholesterol biosynthetic process	62	0.81035	2.64569	0.00178891	0.0490018	0.0428501	322	tags=40%, list=2%, signal=40%	HMGCS1/INSIG1/MSMO1/TM7SF2/SCD/HMGCR/SQLE/IDI1/DHCR7/MVD/MVK/FDFT1/NPC1L1/HSD17B7/ACAT2/FDPS/LSS/DHCR24/SC5D/CYP51A1/NSDHL/SREBF2/EBP/ELOVL6/FASN
GO:0061387	GO:0061387	regulation of extent of cell growth	95	0.478414	1.66401	0.00179211	0.0490018	0.0428501	1797	tags=22%, list=10%, signal=20%	EPHA7/NTN1/SEMA3D/TRPC5/SEMA6A/SEMA6D/FGF13/RTN4R/MAPT/CDH4/SEMA3B/SEMA5A/DPYSL2/SEMA6C/RTN4/NGF/L1CAM/CDKL3/MEGF8/OLFM1/FN1
GO:1902652	GO:1902652	secondary alcohol metabolic process	112	0.69133	2.47565	0.00179211	0.0490018	0.0428501	427	tags=26%, list=2%, signal=25%	PCSK9/HMGCS1/INSIG1/MSMO1/TM7SF2/SCD/HMGCR/SQLE/IDI1/DHCR7/MVD/MVK/FDFT1/NPC1L1/HSD17B7/ACAT2/FDPS/LSS/DHCR24/LDLR/SC5D/CYP51A1/ERG28/NSDHL/SREBF2/EBP/ELOVL6/FASN/LIPC
GO:0006637	GO:0006637	acyl-CoA metabolic process	85	0.50597	1.74186	0.00179856	0.0490018	0.0428501	1236	tags=20%, list=7%, signal=19%	HMGCS1/SCD/MVD/MVK/ELOVL6/FASN/ACSS2/PDK4/SNCA/ACACA/ACSL3/DBI/ACLY/PIPOX/SLC25A1/ELOVL3/HSD17B12
GO:0006638	GO:0006638	neutral lipid metabolic process	80	0.538827	1.83926	0.00179856	0.0490018	0.0428501	1219	tags=14%, list=7%, signal=13%	PCSK9/FABP3/INSIG1/LDLR/LPIN1/PNPLA3/LIPC/SNCA/PCK2/C3/DGKI
GO:0006959	GO:0006959	humoral immune response	90	0.482958	1.67101	0.00179856	0.0490018	0.0428501	2385	tags=37%, list=14%, signal=32%	LTF/RARRES2/C7/CLU/CXCL8/ST6GAL1/HIST1H2BE/HIST2H2BE/BST1/C9/C5AR1/CXCL6/VTN/MASP1/CXCL10/CFB/C3/RBPJ/HIST1H2BC/PLA2G6/C1S/HIST1H2BG/CD46/CXCL3/C2/SERPING1/HIST1H2BK/POU2F2/PROS1/ZP3/SPON2/HPX/HIST1H2BJ
GO:0019218	GO:0019218	regulation of steroid metabolic process	90	0.608343	2.10484	0.00179856	0.0490018	0.0428501	322	tags=23%, list=2%, signal=23%	HMGCS1/INSIG1/TM7SF2/SCD/HMGCR/SQLE/IDI1/DHCR7/MVD/MVK/FDFT1/BMP6/FDPS/LSS/LDLR/SC5D/CYP51A1/STARD4/SREBF2/ELOVL6/FASN
GO:0035383	GO:0035383	thioester metabolic process	85	0.50597	1.74186	0.00179856	0.0490018	0.0428501	1236	tags=20%, list=7%, signal=19%	HMGCS1/SCD/MVD/MVK/ELOVL6/FASN/ACSS2/PDK4/SNCA/ACACA/ACSL3/DBI/ACLY/PIPOX/SLC25A1/ELOVL3/HSD17B12
GO:0007156	GO:0007156	homophilic cell adhesion via plasma membrane adhesion molecules	105	0.574986	2.0323	0.0018018	0.0490018	0.0428501	2903	tags=46%, list=16%, signal=38%	CDHR1/FAT3/PCDHA6/PCDHB18P/PCDHB10/PCDHB4/PCDHA1/PCDHB11/PCDHB5/CADM1/PCDHB12/PCDHB14/PCDHB9/PCDHB6/SDK1/PCDHGB1/PCDHB7/DCHS1/PCDHB2/CDH4/PCDHA4/PCDHB15/PCDHB8/PCDH1/PCDHB3/CDHR3/PCDHGA10/PCDHGB3/PCDHB13/PCDHGB2/CELSR3/L1CAM/PCDHGA7/PCDHGA1/PCDHGA3/PCDHGA5/PTPRM/PCDHGB6/PLXNB3/PCDHGA4/CDH13/PCDHGB7/TRO/AMIGO1/NECTIN1/PKD1/PCDHB16/ROBO3
GO:0006641	GO:0006641	triglyceride metabolic process	61	0.585981	1.90689	0.00180505	0.0490018	0.0428501	1029	tags=15%, list=6%, signal=14%	PCSK9/FABP3/INSIG1/LDLR/LPIN1/PNPLA3/LIPC/PCK2/C3
GO:0007215	GO:0007215	glutamate receptor signaling pathway	60	0.535413	1.73886	0.00180505	0.0490018	0.0428501	2911	tags=37%, list=17%, signal=31%	GRIA1/KCNB1/CX3CL1/KLHL24/TIAM1/NLGN3/RELN/CACNG4/PRNP/GRIA3/CRHBP/NLGN1/CNIH3/GRIK5/MAPK8IP2/APP/DAPK1/NECAB2/CACNG7/FYN/GRID1/GNAQ
GO:0016125	GO:0016125	sterol metabolic process	120	0.690918	2.48878	0.00180505	0.0490018	0.0428501	427	tags=27%, list=2%, signal=26%	PCSK9/HMGCS1/INSIG1/MSMO1/TM7SF2/SCD/HMGCR/SQLE/IDI1/DHCR7/MVD/MVK/FDFT1/NPC1L1/HSD17B7/ACAT2/FDPS/LSS/DHCR24/LDLR/SC5D/CYP51A1/ERG28/NSDHL/SREBF2/CYP26B1/EBP/CYP1B1/ELOVL6/FASN/FAXDC2/LIPC
GO:1902930	GO:1902930	regulation of alcohol biosynthetic process	61	0.676673	2.20202	0.00180505	0.0490018	0.0428501	322	tags=30%, list=2%, signal=29%	HMGCS1/TM7SF2/SCD/HMGCR/SQLE/IDI1/DHCR7/MVD/MVK/FDFT1/BMP6/FDPS/LSS/SC5D/CYP51A1/SREBF2/ELOVL6/FASN
GO:0035725	GO:0035725	sodium ion transmembrane transport	86	0.5085	1.75018	0.00181159	0.0490018	0.0428501	2549	tags=27%, list=14%, signal=23%	PCSK9/HCN4/ATP1A2/SLC9B1/KLHL24/ASIC3/SCN7A/DRD4/SLC9A9/GLRX/SCN9A/SCN3B/SCN11A/HECW1/PKD2/HCN3/SCN2A/SLC20A1/SLC24A1/SCN8A/SLC28A3/HECW2/CNKSR3
GO:0007416	GO:0007416	synapse assembly	117	0.579585	2.08409	0.00182149	0.0490018	0.0428501	2873	tags=38%, list=16%, signal=32%	EPHA7/NTN1/CNTN5/CBLN2/SLITRK6/MUSK/ACHE/PCDHB10/PCDHB4/SPTBN2/PCDHB11/PCDHB5/PCDHB14/PCDHB9/PCDHB6/LRRTM2/SDK1/NLGN3/PCDHB2/SNCA/BSN/FLRT3/NRXN2/PCDHB3/SRPX2/NLGN1/MDGA1/PCDHB13/ARHGEF9/RAB17/NTRK2/OXTR/GPC4/COLQ/FZD1/SLITRK5/APP/ADGRL1/MAGI2/LRRC24/ADGRB2/AMIGO1/LRFN5/NECTIN1/PCDHB16
GO:0008203	GO:0008203	cholesterol metabolic process	108	0.694754	2.46064	0.00182149	0.0490018	0.0428501	427	tags=26%, list=2%, signal=25%	PCSK9/HMGCS1/INSIG1/MSMO1/TM7SF2/SCD/HMGCR/SQLE/IDI1/DHCR7/MVD/MVK/FDFT1/NPC1L1/HSD17B7/ACAT2/FDPS/LSS/DHCR24/LDLR/SC5D/CYP51A1/NSDHL/SREBF2/EBP/ELOVL6/FASN/LIPC
GO:0071804	GO:0071804	cellular potassium ion transport	117	0.441549	1.58774	0.00182149	0.0490018	0.0428501	1687	tags=21%, list=10%, signal=19%	HCN4/KCNJ5/KCNK9/KCNB1/KCNA3/KCNJ2/ATP1A2/KCNT2/KCNJ12/KCNJ6/KLHL24/KCNA7/KCNMB4/KEL/ANK2/SLC9A9/KCND3/KCNH2/PRNP/AQP1/KCNH1/KCNK3/KCND2/PKD2/HCN3
GO:0071805	GO:0071805	potassium ion transmembrane transport	117	0.441549	1.58774	0.00182149	0.0490018	0.0428501	1687	tags=21%, list=10%, signal=19%	HCN4/KCNJ5/KCNK9/KCNB1/KCNA3/KCNJ2/ATP1A2/KCNT2/KCNJ12/KCNJ6/KLHL24/KCNA7/KCNMB4/KEL/ANK2/SLC9A9/KCND3/KCNH2/PRNP/AQP1/KCNH1/KCNK3/KCND2/PKD2/HCN3
GO:0046470	GO:0046470	phosphatidylcholine metabolic process	55	0.554494	1.78204	0.00184162	0.0490018	0.0428501	1817	tags=24%, list=10%, signal=21%	PLA2G3/FABP3/PLA2G4C/LDLR/LPIN1/ACHE/LIPC/ACSL3/DBI/PLA2G6/SLC44A2/HRASLS/ABHD4
GO:0061035	GO:0061035	regulation of cartilage development	55	0.556882	1.78971	0.00184162	0.0490018	0.0428501	1570	tags=29%, list=9%, signal=27%	PTHLH/MAF/GDF5/BMP6/GDF6/NOG/FGF18/WNT9A/CTSK/ZNF219/FRZB/SOX9/NKX3-2/SOX5/TGFBR1/SCX
GO:0010107	GO:0010107	potassium ion import	24	0.686292	1.85615	0.00184843	0.0490018	0.0428501	339	tags=25%, list=2%, signal=25%	HCN4/KCNJ5/KCNJ2/ATP1A2/KCNJ12/KCNJ6
GO:0060999	GO:0060999	positive regulation of dendritic spine development	37	0.600193	1.77312	0.00185185	0.0490018	0.0428501	1244	tags=22%, list=7%, signal=20%	CAMK2B/LRP8/TIAM1/PAK3/ITPKA/RELN/LPAR1/NLGN1
GO:0001919	GO:0001919	regulation of receptor recycling	22	0.728813	1.92	0.00186567	0.0490018	0.0428501	785	tags=18%, list=4%, signal=17%	PCSK9/ACHE/NSG1/SNCA
GO:0008299	GO:0008299	isoprenoid biosynthetic process	22	0.782501	2.06143	0.00186567	0.0490018	0.0428501	748	tags=45%, list=4%, signal=44%	HMGCS1/HMGCR/IDI1/MVD/MVK/FDFT1/FDPS/ALDH1A2/ALDH1A3/RBP1
GO:0070050	GO:0070050	neuron cellular homeostasis	22	0.685344	1.80548	0.00186567	0.0490018	0.0428501	346	tags=18%, list=2%, signal=18%	ATP2B3/ATP2B2/CX3CL1/CALB2
GO:0001941	GO:0001941	postsynaptic membrane organization	33	0.598092	1.71965	0.00186916	0.0490018	0.0428501	2423	tags=33%, list=14%, signal=29%	MUSK/NLGN3/RELN/LRRC4/GLRB/NRXN2/NLGN1/COLQ/ETV5/GDNF/MAGI2
GO:0006956	GO:0006956	complement activation	33	0.628246	1.80635	0.00186916	0.0490018	0.0428501	2102	tags=39%, list=12%, signal=35%	C7/CLU/C9/C5AR1/VTN/MASP1/CFB/C3/C1S/CD46/C2/SERPING1/PROS1
GO:0035082	GO:0035082	axoneme assembly	34	0.64582	1.87206	0.00186916	0.0490018	0.0428501	3108	tags=44%, list=18%, signal=36%	PLA2G3/CCDC114/RSPH4A/CFAP44/TTLL1/DNAH7/DNAH1/LRRC49/CCDC40/NEURL1/DNALI1/IQCG/RSPH9/TOGARAM1/LRRC6
GO:1990573	GO:1990573	potassium ion import across plasma membrane	20	0.749357	1.93332	0.00186916	0.0490018	0.0428501	339	tags=30%, list=2%, signal=29%	HCN4/KCNJ5/KCNJ2/ATP1A2/KCNJ12/KCNJ6
GO:0001774	GO:0001774	microglial cell activation	17	0.737163	1.84337	0.00187266	0.0490018	0.0428501	785	tags=35%, list=4%, signal=34%	CLU/LDLR/CX3CL1/MAPT/TLR6/SNCA
GO:0001881	GO:0001881	receptor recycling	32	0.610703	1.74513	0.00187266	0.0490018	0.0428501	785	tags=12%, list=4%, signal=12%	PCSK9/ACHE/NSG1/SNCA
GO:0002269	GO:0002269	leukocyte activation involved in inflammatory response	17	0.737163	1.84337	0.00187266	0.0490018	0.0428501	785	tags=35%, list=4%, signal=34%	CLU/LDLR/CX3CL1/MAPT/TLR6/SNCA
GO:0006958	GO:0006958	complement activation, classical pathway	17	0.757669	1.89464	0.00187266	0.0490018	0.0428501	1620	tags=47%, list=9%, signal=43%	C7/CLU/C9/C3/C1S/CD46/C2/SERPING1
GO:0050775	GO:0050775	positive regulation of dendrite morphogenesis	35	0.589018	1.71784	0.00187266	0.0490018	0.0428501	718	tags=17%, list=4%, signal=16%	CAMK2B/LRP8/TIAM1/PAK3/ITPKA/RELN
GO:0002920	GO:0002920	regulation of humoral immune response	30	0.646388	1.82653	0.00187617	0.0490018	0.0428501	2341	tags=47%, list=13%, signal=41%	C7/CLU/C9/C5AR1/VTN/CFB/C3/C1S/CD46/C2/SERPING1/PROS1/ZP3/HPX
GO:0016339	GO:0016339	calcium-dependent cell-cell adhesion via plasma membrane cell adhesion molecules	30	0.701243	1.98153	0.00187617	0.0490018	0.0428501	1311	tags=50%, list=7%, signal=46%	PCDHB10/PCDHB4/PCDHB11/PCDHB5/ARVCF/PCDHB14/PCDHB9/PCDHB6/DCHS1/PCDHB2/CDH4/PCDHB3/CDHR3/NLGN1/PCDHB13
GO:0086010	GO:0086010	membrane depolarization during action potential	29	0.644564	1.80987	0.00187617	0.0490018	0.0428501	1699	tags=38%, list=10%, signal=34%	HCN4/KCNJ2/ATP1A2/SCN7A/ANK2/KCNH2/SCN9A/CACNA1G/SCN3B/SCN11A/SCN2A
GO:0032330	GO:0032330	regulation of chondrocyte differentiation	41	0.582157	1.7529	0.0018797	0.0490018	0.0428501	1343	tags=29%, list=8%, signal=27%	PTHLH/MAF/GDF5/BMP6/GDF6/FGF18/WNT9A/ZNF219/SOX9/NKX3-2/SOX5/TGFBR1
GO:0090181	GO:0090181	regulation of cholesterol metabolic process	52	0.765641	2.42686	0.00189036	0.0490018	0.0428501	322	tags=35%, list=2%, signal=34%	HMGCS1/TM7SF2/SCD/HMGCR/SQLE/IDI1/DHCR7/MVD/MVK/FDFT1/FDPS/LSS/LDLR/SC5D/CYP51A1/SREBF2/ELOVL6/FASN
GO:0021522	GO:0021522	spinal cord motor neuron differentiation	18	0.727251	1.82504	0.00189394	0.0490018	0.0428501	2398	tags=39%, list=14%, signal=34%	SHH/MDGA2/SOX4/LHX4/CLN8/TCTN1/PTCH1
GO:0048643	GO:0048643	positive regulation of skeletal muscle tissue development	18	0.704793	1.76868	0.00189394	0.0490018	0.0428501	266	tags=17%, list=2%, signal=16%	SHH/HMGCR/CYP26B1
GO:0061003	GO:0061003	positive regulation of dendritic spine morphogenesis	18	0.815639	2.04685	0.00189394	0.0490018	0.0428501	718	tags=33%, list=4%, signal=32%	CAMK2B/LRP8/TIAM1/PAK3/ITPKA/RELN
GO:0099172	GO:0099172	presynapse organization	28	0.651667	1.81683	0.00189753	0.0490018	0.0428501	1979	tags=32%, list=11%, signal=29%	CNTN5/CBLN2/NLGN3/SNCA/NLGN1/MDGA1/GPC4/FZD1/APP
GO:0034381	GO:0034381	plasma lipoprotein particle clearance	42	0.579868	1.74762	0.0019084	0.0490018	0.0428501	2260	tags=26%, list=13%, signal=23%	PCSK9/LIPG/LDLR/LIPC/LIPA/CUBN/MSR1/LMF1/MIR199A1/VLDLR/NPC2
GO:0045540	GO:0045540	regulation of cholesterol biosynthetic process	42	0.797631	2.40392	0.0019084	0.0490018	0.0428501	322	tags=40%, list=2%, signal=40%	HMGCS1/TM7SF2/SCD/HMGCR/SQLE/IDI1/DHCR7/MVD/MVK/FDFT1/FDPS/LSS/SC5D/CYP51A1/SREBF2/ELOVL6/FASN
GO:0051965	GO:0051965	positive regulation of synapse assembly	42	0.576514	1.73751	0.0019084	0.0490018	0.0428501	3234	tags=38%, list=18%, signal=31%	CBLN2/SLITRK6/LRRTM2/NLGN3/FLRT3/SRPX2/NLGN1/NTRK2/OXTR/SLITRK5/ADGRL1/LRRC24/ADGRB2/AMIGO1/TPBG/ADGRL3
GO:0072376	GO:0072376	protein activation cascade	43	0.635288	1.91211	0.0019084	0.0490018	0.0428501	2433	tags=42%, list=14%, signal=36%	KLKB1/C7/CLU/C9/C5AR1/VTN/MASP1/CFB/C3/C1S/CD46/C2/SERPING1/F10/VWF/PROS1/FBLN1/F8
GO:0098659	GO:0098659	inorganic cation import across plasma membrane	42	0.587479	1.77056	0.0019084	0.0490018	0.0428501	1027	tags=19%, list=6%, signal=18%	HCN4/KCNJ5/KCNJ2/ATP1A2/KCNJ12/KCNJ6/SLC9A9/PRNP
GO:0099587	GO:0099587	inorganic ion import across plasma membrane	42	0.587479	1.77056	0.0019084	0.0490018	0.0428501	1027	tags=19%, list=6%, signal=18%	HCN4/KCNJ5/KCNJ2/ATP1A2/KCNJ12/KCNJ6/SLC9A9/PRNP
GO:0106118	GO:0106118	regulation of sterol biosynthetic process	42	0.797631	2.40392	0.0019084	0.0490018	0.0428501	322	tags=40%, list=2%, signal=40%	HMGCS1/TM7SF2/SCD/HMGCR/SQLE/IDI1/DHCR7/MVD/MVK/FDFT1/FDPS/LSS/SC5D/CYP51A1/SREBF2/ELOVL6/FASN
GO:0010996	GO:0010996	response to auditory stimulus	15	0.759458	1.82939	0.00191571	0.0490018	0.0428501	1578	tags=40%, list=9%, signal=36%	STRA6/SLITRK6/CXCL10/NRXN2/USP53/FOXP2
GO:0048261	GO:0048261	negative regulation of receptor-mediated endocytosis	15	0.745339	1.79538	0.00191571	0.0490018	0.0428501	2256	tags=33%, list=13%, signal=29%	PCSK9/LRRTM2/SYT11/MIR199A1/NECAB2
GO:0030449	GO:0030449	regulation of complement activation	27	0.653198	1.8012	0.00192678	0.0490018	0.0428501	2102	tags=44%, list=12%, signal=39%	C7/CLU/C9/C5AR1/VTN/CFB/C3/C1S/CD46/C2/SERPING1/PROS1
GO:0099054	GO:0099054	presynapse assembly	27	0.652646	1.79968	0.00192678	0.0490018	0.0428501	1979	tags=33%, list=11%, signal=30%	CNTN5/CBLN2/NLGN3/SNCA/NLGN1/MDGA1/GPC4/FZD1/APP
GO:2000257	GO:2000257	regulation of protein activation cascade	27	0.653198	1.8012	0.00192678	0.0490018	0.0428501	2102	tags=44%, list=12%, signal=39%	C7/CLU/C9/C5AR1/VTN/CFB/C3/C1S/CD46/C2/SERPING1/PROS1
GO:0010984	GO:0010984	regulation of lipoprotein particle clearance	14	0.771542	1.81346	0.0019305	0.0490018	0.0428501	150	tags=21%, list=1%, signal=21%	PCSK9/LIPG/LDLR
GO:0002385	GO:0002385	mucosal immune response	10	0.821306	1.77728	0.00197628	0.0490018	0.0428501	2385	tags=80%, list=14%, signal=69%	LTF/HIST1H2BE/HIST2H2BE/HIST1H2BC/RAB17/HIST1H2BG/HIST1H2BK/HIST1H2BJ
GO:0071501	GO:0071501	cellular response to sterol depletion	10	0.832143	1.80073	0.00197628	0.0490018	0.0428501	101	tags=20%, list=1%, signal=20%	INSIG1/NPC1L1
GO:0010745	GO:0010745	negative regulation of macrophage derived foam cell differentiation	10	-0.824049	-1.84096	0.00201613	0.0490018	0.0428501	481	tags=40%, list=3%, signal=39%	ITGB3/ABCA1/ABCG1
GO:0060019	GO:0060019	radial glial cell differentiation	10	-0.8318	-1.85828	0.00201613	0.0490018	0.0428501	26	tags=50%, list=0%, signal=50%	RHOA/GPR157/HES1/HES5
GO:1902969	GO:1902969	mitotic DNA replication	10	-0.815229	-1.82126	0.00201613	0.0490018	0.0428501	1428	tags=50%, list=8%, signal=46%	LIG1/GINS1/BRCA2/CDC45
GO:1905820	GO:1905820	positive regulation of chromosome separation	10	-0.802789	-1.79346	0.00201613	0.0490018	0.0428501	754	tags=40%, list=4%, signal=38%	ESPL1/DLGAP5/CDT1
GO:0060713	GO:0060713	labyrinthine layer morphogenesis	14	-0.773049	-1.88405	0.00206612	0.0490018	0.0428501	2477	tags=50%, list=14%, signal=43%	CYR61/ADM/SOCS3/BMP5/SPINT1/RSPO3
GO:0090231	GO:0090231	regulation of spindle checkpoint	14	-0.777524	-1.89495	0.00206612	0.0490018	0.0428501	850	tags=57%, list=5%, signal=54%	ANAPC15/XRCC3/NDC80/DUSP1/MAD2L1/CCNB1/CDT1
GO:0090266	GO:0090266	regulation of mitotic cell cycle spindle assembly checkpoint	14	-0.777524	-1.89495	0.00206612	0.0490018	0.0428501	850	tags=57%, list=5%, signal=54%	ANAPC15/XRCC3/NDC80/DUSP1/MAD2L1/CCNB1/CDT1
GO:1902259	GO:1902259	regulation of delayed rectifier potassium channel activity	14	-0.758733	-1.84916	0.00206612	0.0490018	0.0428501	1630	tags=57%, list=9%, signal=52%	AKAP6/KCNE1B/KCNE4/RNF207/NOS1AP/KCNS2/KCNE3
GO:1903504	GO:1903504	regulation of mitotic spindle checkpoint	14	-0.777524	-1.89495	0.00206612	0.0490018	0.0428501	850	tags=57%, list=5%, signal=54%	ANAPC15/XRCC3/NDC80/DUSP1/MAD2L1/CCNB1/CDT1
GO:0010971	GO:0010971	positive regulation of G2/M transition of mitotic cell cycle	27	-0.725795	-2.06968	0.00207039	0.0490018	0.0428501	1702	tags=48%, list=10%, signal=44%	STOX1/DBF4B/CDC25C/RECQL4/FBXO5/CDK1/HSPA2/CDC7/CCNB1/CDC25A/WNT10B/DTL
GO:0051984	GO:0051984	positive regulation of chromosome segregation	27	-0.675637	-1.92665	0.00207039	0.0490018	0.0428501	1671	tags=48%, list=9%, signal=44%	SFPQ/HNRNPU/RAD21/SLF1/RAD18/DDX11/FEN1/ESPL1/DLGAP5/CCNB1/CDC6/CDT1
GO:0000076	GO:0000076	DNA replication checkpoint	15	-0.80067	-2.01134	0.00208333	0.0490018	0.0428501	1661	tags=67%, list=9%, signal=60%	TIPIN/TICRR/TIMELESS/DNA2/CLSPN/CDC6/CDT1/ORC1/CDC45
GO:0006206	GO:0006206	pyrimidine nucleobase metabolic process	15	-0.745862	-1.87366	0.00208333	0.0490018	0.0428501	3261	tags=60%, list=18%, signal=49%	DPYD/TYMP/CAD/DHODH/CDA/RRM1/TYMS/CTPS1
GO:0007076	GO:0007076	mitotic chromosome condensation	15	-0.832661	-2.09171	0.00208333	0.0490018	0.0428501	1647	tags=53%, list=9%, signal=48%	NCAPD2/SMC2/SMC4/NCAPG/CDCA5/NCAPH/NUSAP1
GO:0048715	GO:0048715	negative regulation of oligodendrocyte differentiation	11	-0.778414	-1.76745	0.00208333	0.0490018	0.0428501	165	tags=55%, list=1%, signal=54%	NOTCH1/ID2/ID4/HES1/HES5
GO:0051382	GO:0051382	kinetochore assembly	15	-0.818853	-2.05702	0.00208333	0.0490018	0.0428501	1974	tags=53%, list=11%, signal=47%	CENPN/CENPH/CENPK/CENPF/CENPA/CENPE/CENPW
GO:0051988	GO:0051988	regulation of attachment of spindle microtubules to kinetochore	12	-0.752371	-1.75438	0.00208333	0.0490018	0.0428501	1808	tags=67%, list=10%, signal=60%	CDC42/ECT2/KNSTRN/RACGAP1/NEK2/CCNB1/SPAG5
GO:1904668	GO:1904668	positive regulation of ubiquitin protein ligase activity	11	-0.770025	-1.7484	0.00208333	0.0490018	0.0428501	3011	tags=55%, list=17%, signal=45%	CDC14B/UBE2S/UBE2C/PLK1/CDC20
GO:2000105	GO:2000105	positive regulation of DNA-dependent DNA replication	11	-0.771058	-1.75075	0.00208333	0.0490018	0.0428501	944	tags=55%, list=5%, signal=52%	DBF4B/E2F8/CDC7/CDT1/CDK2
GO:0007080	GO:0007080	mitotic metaphase plate congression	43	-0.705305	-2.20972	0.00209205	0.0490018	0.0428501	849	tags=33%, list=5%, signal=31%	SPDL1/KIF22/KIF18A/KIF14/PSRC1/KIFC1/KIF2C/CENPE/CDCA8/CDCA5/CCNB1/CDT1/NUF2
GO:0010742	GO:0010742	macrophage derived foam cell differentiation	26	-0.670545	-1.88858	0.00209644	0.0490018	0.0428501	1386	tags=31%, list=8%, signal=28%	PRKCH/AGTR1/AGT/CSF1/ITGB3/ABCA1/ABCG1
GO:0090077	GO:0090077	foam cell differentiation	26	-0.670545	-1.88858	0.00209644	0.0490018	0.0428501	1386	tags=31%, list=8%, signal=28%	PRKCH/AGTR1/AGT/CSF1/ITGB3/ABCA1/ABCG1
GO:1904385	GO:1904385	cellular response to angiotensin	18	-0.766744	-1.98819	0.0021097	0.0490018	0.0428501	818	tags=50%, list=5%, signal=48%	AHCYL1/AGTR1/AGT/BRIP1/CDC6/MIR145/CAMK2A/CYBA
GO:0007062	GO:0007062	sister chromatid cohesion	51	-0.647065	-2.09544	0.00211416	0.0490018	0.0428501	1671	tags=33%, list=9%, signal=30%	RAD21L1/SGO2/ESCO2/DDX11/KIF22/FEN1/ESPL1/BUB1B/DSCC1/HASPIN/DDX12P/CDCA5/BUB1/SGO1/PLK1/CDC20
GO:0010888	GO:0010888	negative regulation of lipid storage	16	-0.747578	-1.88817	0.00211416	0.0490018	0.0428501	481	tags=31%, list=3%, signal=30%	ABHD5/ITGB3/ABCA1/ABCG1
GO:0051784	GO:0051784	negative regulation of nuclear division	51	-0.68278	-2.21109	0.00211416	0.0490018	0.0428501	1427	tags=39%, list=8%, signal=36%	CHEK1/XRCC3/NDC80/SPDL1/FBXO5/BUB1B/PTTG1/DUSP1/MAD2L1/CENPF/MTBP/CCNB1/TTK/BUB1/CDT1/TRIP13/AURKB/PLK1/CDC20
GO:2000737	GO:2000737	negative regulation of stem cell differentiation	16	-0.722576	-1.82502	0.00211416	0.0490018	0.0428501	26	tags=31%, list=0%, signal=31%	TRIM6/NOTCH1/HES1/HES5
GO:0008608	GO:0008608	attachment of spindle microtubules to kinetochore	31	-0.71333	-2.05879	0.00212766	0.0490018	0.0428501	953	tags=42%, list=5%, signal=40%	NDC80/RACGAP1/KNL1/NEK2/KIF2C/CENPE/CCNB1/CDT1/NUF2/SPAG5/AURKB/SGO1
GO:0030071	GO:0030071	regulation of mitotic metaphase/anaphase transition	50	-0.761084	-2.44713	0.00212766	0.0490018	0.0428501	850	tags=40%, list=5%, signal=38%	NDC80/SPDL1/FBXO5/ESPL1/BUB1B/DUSP1/MAD2L1/CENPF/CENPE/DLGAP5/CCNB1/TTK/CDC6/BUB1/CDT1/TRIP13/AURKB/PLK1/CDC20
GO:0033046	GO:0033046	negative regulation of sister chromatid segregation	41	-0.764336	-2.365	0.00212766	0.0490018	0.0428501	850	tags=44%, list=5%, signal=42%	NDC80/SPDL1/FBXO5/ESPL1/BUB1B/PTTG1/DUSP1/MAD2L1/CENPF/CCNB1/TTK/BUB1/CDT1/TRIP13/AURKB/PLK1/CDC20
GO:0051985	GO:0051985	negative regulation of chromosome segregation	41	-0.764336	-2.365	0.00212766	0.0490018	0.0428501	850	tags=44%, list=5%, signal=42%	NDC80/SPDL1/FBXO5/ESPL1/BUB1B/PTTG1/DUSP1/MAD2L1/CENPF/CCNB1/TTK/BUB1/CDT1/TRIP13/AURKB/PLK1/CDC20
GO:1902099	GO:1902099	regulation of metaphase/anaphase transition of cell cycle	50	-0.761084	-2.44713	0.00212766	0.0490018	0.0428501	850	tags=40%, list=5%, signal=38%	NDC80/SPDL1/FBXO5/ESPL1/BUB1B/DUSP1/MAD2L1/CENPF/CENPE/DLGAP5/CCNB1/TTK/CDC6/BUB1/CDT1/TRIP13/AURKB/PLK1/CDC20
GO:0006301	GO:0006301	postreplication repair	49	-0.590025	-1.89223	0.0021322	0.0490018	0.0428501	2615	tags=33%, list=15%, signal=28%	MSH2/MAD2L2/PCNA/RPA3/RAD18/POLD3/POLD1/RFC5/BRCA1/RFC4/PCLAF/RFC2/RFC3/DTL/POLE2
GO:0010965	GO:0010965	regulation of mitotic sister chromatid separation	54	-0.763041	-2.49	0.0021322	0.0490018	0.0428501	850	tags=41%, list=5%, signal=39%	NDC80/SPDL1/FBXO5/ESPL1/BUB1B/PTTG1/DUSP1/MAD2L1/CENPF/CENPE/TACC3/DLGAP5/CCNB1/TTK/CDC6/BUB1/CDT1/TRIP13/AURKB/PLK1/CDC20
GO:0032201	GO:0032201	telomere maintenance via semi-conservative replication	25	-0.746704	-2.08016	0.0021322	0.0490018	0.0428501	2615	tags=64%, list=15%, signal=55%	RTEL1/ACD/PCNA/RPA3/POLA1/POLD3/POLD1/DNA2/RFC5/RFC4/FEN1/POLA2/RFC2/RFC3/PRIM1
GO:0033260	GO:0033260	nuclear DNA replication	49	-0.673268	-2.15919	0.0021322	0.0490018	0.0428501	2321	tags=55%, list=13%, signal=48%	WDR18/ACD/TIPIN/PCNA/RPA3/POLA1/POLD3/DONSON/LIG1/POLD1/DNA2/DBF4B/RFC5/RFC4/GINS1/GMNN/ATAD5/FEN1/POLA2/RFC2/BRCA2/RFC3/CDC7/CDT1/PRIM1/CDC45
GO:0051315	GO:0051315	attachment of mitotic spindle microtubules to kinetochore	13	-0.800448	-1.89387	0.0021322	0.0490018	0.0428501	849	tags=38%, list=5%, signal=37%	KIF2C/CENPE/CDT1/NUF2
GO:0090329	GO:0090329	regulation of DNA-dependent DNA replication	49	-0.608725	-1.9522	0.0021322	0.0490018	0.0428501	2213	tags=41%, list=13%, signal=36%	WDR18/TIPIN/TICRR/DONSON/TIMELESS/DBF4B/RFC5/RFC4/GMNN/FBXO5/E2F8/BLM/RFC2/DSCC1/RFC3/CDC7/CHTF18/CDT1/CDK2
GO:1902750	GO:1902750	negative regulation of cell cycle G2/M phase transition	54	-0.574965	-1.87626	0.0021322	0.0490018	0.0428501	3026	tags=35%, list=17%, signal=29%	BABAM1/CDC14B/PINX1/TOPBP1/HMGA2/TICRR/DONSON/CHEK1/AURKA/BRCA1/CDK1/BLM/CLSPN/CDC6/DTL/AURKB/ORC1/PLK1
GO:1902751	GO:1902751	positive regulation of cell cycle G2/M phase transition	30	-0.716544	-2.04137	0.0021322	0.0490018	0.0428501	1702	tags=47%, list=10%, signal=42%	STOX1/DBF4B/CDC25C/ATAD5/RECQL4/FBXO5/CDK1/HSPA2/CDC7/CCNB1/CDC25A/WNT10B/DTL
GO:0006271	GO:0006271	DNA strand elongation involved in DNA replication	17	-0.845683	-2.15674	0.00213675	0.0490018	0.0428501	1609	tags=76%, list=9%, signal=70%	POLA1/LIG1/POLE/DNA2/RFC4/GINS1/FEN1/GINS4/RNASEH2A/RFC3/GINS3/GINS2
GO:0006336	GO:0006336	DNA replication-independent nucleosome assembly	45	-0.635156	-1.99934	0.00213675	0.0490018	0.0428501	2927	tags=58%, list=17%, signal=48%	RBBP7/CENPP/CENPL/CENPQ/HAT1/CENPX/CENPI/MIS18BP1/POLE3/CENPO/NASP/CENPN/IPO4/MIS18A/ITGB3BP/ASF1B/CENPH/CENPU/KNL1/CENPK/HJURP/CENPA/CENPM/OIP5/CENPW
GO:0030261	GO:0030261	chromosome condensation	32	-0.705789	-2.05728	0.00213675	0.0490018	0.0428501	2032	tags=44%, list=12%, signal=39%	NCAPH2/NCAPD3/NCAPD2/SMC2/SMC4/NCAPG/NCAPG2/TOP2A/CDK1/CDCA5/CCNB1/NCAPH/NUSAP1
GO:0034080	GO:0034080	CENP-A containing nucleosome assembly	35	-0.643371	-1.9299	0.00213675	0.0490018	0.0428501	2927	tags=66%, list=17%, signal=55%	RBBP7/CENPP/CENPL/CENPQ/CENPX/CENPI/MIS18BP1/POLE3/CENPO/NASP/CENPN/MIS18A/ITGB3BP/CENPH/CENPU/KNL1/CENPK/HJURP/CENPA/CENPM/OIP5/CENPW
GO:0034501	GO:0034501	protein localization to kinetochore	17	-0.8187	-2.08793	0.00213675	0.0490018	0.0428501	849	tags=53%, list=5%, signal=50%	SPDL1/KNL1/CDK1/MTBP/HASPIN/TTK/CDT1/AURKB
GO:0045740	GO:0045740	positive regulation of DNA replication	35	-0.620235	-1.86049	0.00213675	0.0490018	0.0428501	3267	tags=46%, list=19%, signal=37%	FAF1/CDC42/STOML2/GLI2/PCNA/DBF4/DNA2/DBF4B/ATAD5/RECQL4/E2F8/CDK1/CDC7/CDT1/CDK2
GO:0045841	GO:0045841	negative regulation of mitotic metaphase/anaphase transition	35	-0.779778	-2.33907	0.00213675	0.0490018	0.0428501	850	tags=46%, list=5%, signal=44%	NDC80/SPDL1/FBXO5/BUB1B/DUSP1/MAD2L1/CENPF/CCNB1/TTK/BUB1/CDT1/TRIP13/AURKB/PLK1/CDC20
GO:0060669	GO:0060669	embryonic placenta morphogenesis	19	-0.712035	-1.8648	0.00213675	0.0490018	0.0428501	2628	tags=47%, list=15%, signal=40%	SPINT2/CYR61/ADM/SOCS3/IGF2/BMP5/SPINT1/RSPO3
GO:0061641	GO:0061641	CENP-A containing chromatin organization	35	-0.643371	-1.9299	0.00213675	0.0490018	0.0428501	2927	tags=66%, list=17%, signal=55%	RBBP7/CENPP/CENPL/CENPQ/CENPX/CENPI/MIS18BP1/POLE3/CENPO/NASP/CENPN/MIS18A/ITGB3BP/CENPH/CENPU/KNL1/CENPK/HJURP/CENPA/CENPM/OIP5/CENPW
GO:1902100	GO:1902100	negative regulation of metaphase/anaphase transition of cell cycle	35	-0.779778	-2.33907	0.00213675	0.0490018	0.0428501	850	tags=46%, list=5%, signal=44%	NDC80/SPDL1/FBXO5/BUB1B/DUSP1/MAD2L1/CENPF/CCNB1/TTK/BUB1/CDT1/TRIP13/AURKB/PLK1/CDC20
GO:0006270	GO:0006270	DNA replication initiation	33	-0.821024	-2.41399	0.00214133	0.0490018	0.0428501	1429	tags=61%, list=8%, signal=56%	POLA1/TICRR/CCNE2/MCM6/POLA2/ORC6/GMNC/MCM3/CDC7/CDC6/MCM7/MCM2/MCM4/CDT1/ORC1/CDK2/MCM5/MCM10/CDC45
GO:0007094	GO:0007094	mitotic spindle assembly checkpoint	33	-0.785903	-2.31073	0.00214133	0.0490018	0.0428501	850	tags=45%, list=5%, signal=43%	NDC80/SPDL1/BUB1B/DUSP1/MAD2L1/CENPF/CCNB1/TTK/BUB1/CDT1/TRIP13/AURKB/PLK1/CDC20
GO:0031577	GO:0031577	spindle checkpoint	33	-0.785903	-2.31073	0.00214133	0.0490018	0.0428501	850	tags=45%, list=5%, signal=43%	NDC80/SPDL1/BUB1B/DUSP1/MAD2L1/CENPF/CCNB1/TTK/BUB1/CDT1/TRIP13/AURKB/PLK1/CDC20
GO:0051383	GO:0051383	kinetochore organization	20	-0.84818	-2.24824	0.00214133	0.0490018	0.0428501	1251	tags=65%, list=7%, signal=60%	CENPN/SMC2/SMC4/NDC80/CENPH/CENPK/CENPF/CENPA/CENPE/CDT1/NUF2/CENPW
GO:0071173	GO:0071173	spindle assembly checkpoint	33	-0.785903	-2.31073	0.00214133	0.0490018	0.0428501	850	tags=45%, list=5%, signal=43%	NDC80/SPDL1/BUB1B/DUSP1/MAD2L1/CENPF/CCNB1/TTK/BUB1/CDT1/TRIP13/AURKB/PLK1/CDC20
GO:0071174	GO:0071174	mitotic spindle checkpoint	33	-0.785903	-2.31073	0.00214133	0.0490018	0.0428501	850	tags=45%, list=5%, signal=43%	NDC80/SPDL1/BUB1B/DUSP1/MAD2L1/CENPF/CCNB1/TTK/BUB1/CDT1/TRIP13/AURKB/PLK1/CDC20
GO:1904666	GO:1904666	regulation of ubiquitin protein ligase activity	20	-0.729633	-1.93401	0.00214133	0.0490018	0.0428501	3011	tags=45%, list=17%, signal=37%	CDC14B/MAD2L2/UBE2S/FBXO5/MAD2L1/UBE2C/PLK1/CDC20
GO:1990776	GO:1990776	response to angiotensin	20	-0.739547	-1.96029	0.00214133	0.0490018	0.0428501	818	tags=35%, list=5%, signal=33%	AGT/BRIP1/CDC6/MIR145/CAMK2A/CYBA
GO:0006297	GO:0006297	nucleotide-excision repair, DNA gap filling	23	-0.682424	-1.8709	0.00214592	0.0490018	0.0428501	1609	tags=65%, list=9%, signal=59%	RPA2/LIG3/XRCC1/RPA1/PCNA/RPA3/POLD3/LIG1/POLE/POLD1/RFC5/RFC4/RFC2/RFC3
GO:0022616	GO:0022616	DNA strand elongation	23	-0.791948	-2.17117	0.00214592	0.0490018	0.0428501	1609	tags=57%, list=9%, signal=51%	POLA1/LIG1/POLE/DNA2/RFC4/GINS1/FEN1/GINS4/RNASEH2A/RFC3/GINS3/GINS2
GO:0045005	GO:0045005	DNA-dependent DNA replication maintenance of fidelity	40	-0.663135	-2.03794	0.00214592	0.0490018	0.0428501	2321	tags=50%, list=13%, signal=44%	SETMAR/RTEL1/FANCM/CENPX/ALYREF/TIPIN/PCNA/RFWD3/MMS22L/DONSON/TIMELESS/POLE/POLD1/DNA2/EME1/DDX11/BLM/BRCA2/TONSL
GO:0070199	GO:0070199	establishment of protein localization to chromosome	23	-0.67235	-1.84329	0.00214592	0.0490018	0.0428501	3568	tags=70%, list=20%, signal=56%	SGF29/CCT7/H2AFY2/CCT2/CCT5/LRWD1/CCT3/CCT4/CCT6A/WRAP53/TCP1/DKC1/ACD/RUVBL2/BRCA2
GO:0071459	GO:0071459	protein localization to chromosome, centromeric region	22	-0.813654	-2.2039	0.00214592	0.0490018	0.0428501	849	tags=50%, list=5%, signal=48%	SPDL1/BUB1B/KNL1/CDK1/CENPA/MTBP/HASPIN/TTK/CDT1/AURKB
GO:0033048	GO:0033048	negative regulation of mitotic sister chromatid segregation	39	-0.759156	-2.3231	0.00215054	0.0490018	0.0428501	850	tags=44%, list=5%, signal=42%	NDC80/SPDL1/FBXO5/BUB1B/PTTG1/DUSP1/MAD2L1/CENPF/CCNB1/TTK/BUB1/CDT1/TRIP13/AURKB/PLK1/CDC20
GO:0007091	GO:0007091	metaphase/anaphase transition of mitotic cell cycle	53	-0.756468	-2.45598	0.00215517	0.0490018	0.0428501	850	tags=40%, list=5%, signal=38%	NDC80/SPDL1/FBXO5/ESPL1/BUB1B/DUSP1/MAD2L1/CENPF/CENPE/TACC3/DLGAP5/CCNB1/TTK/CDC6/BUB1/CDT1/TRIP13/AURKB/PLK1/CDC20
GO:0031145	GO:0031145	anaphase-promoting complex-dependent catabolic process	36	-0.722025	-2.16125	0.00215517	0.0490018	0.0428501	1186	tags=36%, list=7%, signal=34%	AURKA/FBXO5/BUB1B/CDK1/PTTG1/MAD2L1/CCNB1/UBE2C/AURKB/PLK1/CDK2/CDC20
GO:0034724	GO:0034724	DNA replication-independent nucleosome organization	46	-0.627042	-1.97935	0.00215517	0.0490018	0.0428501	2927	tags=57%, list=17%, signal=47%	RBBP7/CENPP/CENPL/CENPQ/HAT1/CENPX/CENPI/MIS18BP1/POLE3/CENPO/NASP/CENPN/IPO4/MIS18A/ITGB3BP/ASF1B/CENPH/CENPU/KNL1/CENPK/HJURP/CENPA/CENPM/OIP5/CENPW
GO:0044784	GO:0044784	metaphase/anaphase transition of cell cycle	53	-0.756468	-2.45598	0.00215517	0.0490018	0.0428501	850	tags=40%, list=5%, signal=38%	NDC80/SPDL1/FBXO5/ESPL1/BUB1B/DUSP1/MAD2L1/CENPF/CENPE/TACC3/DLGAP5/CCNB1/TTK/CDC6/BUB1/CDT1/TRIP13/AURKB/PLK1/CDC20
GO:0070192	GO:0070192	chromosome organization involved in meiotic cell cycle	46	-0.613282	-1.93591	0.00215517	0.0490018	0.0428501	2014	tags=43%, list=11%, signal=39%	NCAPD3/MEI1/NDC1/RAD21L1/NCAPD2/CCNE1/CCNE2/SGO2/TEX15/SMC2/STAG3/SMC4/BUB1B/DMC1/BRIP1/FANCD2/NCAPH/BUB1/TRIP13
GO:1905819	GO:1905819	negative regulation of chromosome separation	36	-0.787437	-2.35705	0.00215517	0.0490018	0.0428501	850	tags=47%, list=5%, signal=45%	NDC80/SPDL1/FBXO5/BUB1B/PTTG1/DUSP1/MAD2L1/CENPF/CCNB1/TTK/BUB1/CDT1/TRIP13/AURKB/PLK1/CDC20
GO:2000816	GO:2000816	negative regulation of mitotic sister chromatid separation	36	-0.787437	-2.35705	0.00215517	0.0490018	0.0428501	850	tags=47%, list=5%, signal=45%	NDC80/SPDL1/FBXO5/BUB1B/PTTG1/DUSP1/MAD2L1/CENPF/CCNB1/TTK/BUB1/CDT1/TRIP13/AURKB/PLK1/CDC20
GO:0000731	GO:0000731	DNA synthesis involved in DNA repair	47	-0.613499	-1.94426	0.0021645	0.0490018	0.0428501	1609	tags=34%, list=9%, signal=31%	MAD2L2/PCNA/RPA3/POLA1/POLD3/POLE/POLD1/RFC5/RFC4/BLM/PCLAF/RFC2/RFC3/DTL/POLE2
GO:0034508	GO:0034508	centromere complex assembly	47	-0.645636	-2.04611	0.0021645	0.0490018	0.0428501	2927	tags=57%, list=17%, signal=48%	RBBP7/CENPP/CENPL/CENPQ/CENPX/CENPV/CENPI/MIS18BP1/POLE3/CENPO/NASP/CENPN/MIS18A/ITGB3BP/CENPH/CENPU/KNL1/CENPK/CENPF/HJURP/CENPA/CENPE/HELLS/CENPM/OIP5/CENPW
GO:0036297	GO:0036297	interstrand cross-link repair	47	-0.630923	-1.99948	0.0021645	0.0490018	0.0428501	4084	tags=47%, list=23%, signal=36%	FANCE/RPA2/FANCL/RAD51D/FAAP100/DCLRE1B/RPA1/FANCM/CENPX/FANCG/RPA3/RFWD3/FANCB/EME1/FANCI/XRCC3/RAD51AP1/MCM8/UBE2T/FANCD2/FANCA
GO:0045839	GO:0045839	negative regulation of mitotic nuclear division	47	-0.725701	-2.29985	0.0021645	0.0490018	0.0428501	1051	tags=40%, list=6%, signal=38%	XRCC3/NDC80/SPDL1/FBXO5/BUB1B/PTTG1/DUSP1/MAD2L1/CENPF/MTBP/CCNB1/TTK/BUB1/CDT1/TRIP13/AURKB/PLK1/CDC20
GO:0051298	GO:0051298	centrosome duplication	58	-0.568038	-1.87031	0.0021645	0.0490018	0.0428501	3961	tags=45%, list=22%, signal=35%	NUP62/ARHGEF10/SPICE1/CEP131/GEN1/NPM1/XPO1/RTTN/CHORDC1/CCP110/RBM14/CENPJ/C2CD3/STIL/SASS6/BRCA1/CEP152/XRCC3/POC1A/CCNF/BRCA2/PLK4/CEP72/WDR62/CDK2
GO:0051306	GO:0051306	mitotic sister chromatid separation	57	-0.744201	-2.44337	0.0021692	0.0490018	0.0428501	850	tags=39%, list=5%, signal=37%	NDC80/SPDL1/FBXO5/ESPL1/BUB1B/PTTG1/DUSP1/MAD2L1/CENPF/CENPE/TACC3/DLGAP5/CCNB1/TTK/CDC6/BUB1/CDT1/TRIP13/AURKB/PLK1/CDC20
GO:1905818	GO:1905818	regulation of chromosome separation	57	-0.751972	-2.46888	0.0021692	0.0490018	0.0428501	850	tags=39%, list=5%, signal=37%	NDC80/SPDL1/FBXO5/ESPL1/BUB1B/PTTG1/DUSP1/MAD2L1/CENPF/CENPE/TACC3/DLGAP5/CCNB1/TTK/CDC6/BUB1/CDT1/TRIP13/AURKB/PLK1/CDC20
GO:0010743	GO:0010743	regulation of macrophage derived foam cell differentiation	21	-0.721456	-1.93746	0.00217391	0.0490018	0.0428501	1386	tags=38%, list=8%, signal=35%	PRKCH/AGTR1/AGT/CSF1/ITGB3/ABCA1/ABCG1
GO:0051310	GO:0051310	metaphase plate congression	55	-0.698846	-2.28369	0.00217865	0.0490018	0.0428501	849	tags=31%, list=5%, signal=30%	SPDL1/KIF22/KIF18A/KIF14/PSRC1/KIFC1/CENPF/KIF2C/CENPE/CDCA8/CDCA5/CCNB1/CDT1/NUF2/SPAG5/FAM83D
GO:0000725	GO:0000725	recombinational repair	118	-0.570623	-2.13296	0.0021978	0.0490018	0.0428501	3859	tags=42%, list=22%, signal=33%	RIF1/SMC6/RAD51D/LIG3/SFPQ/XRCC1/FIGN/RMI2/GEN1/RMI1/NABP1/RPA1/WRAP53/RPA4/RTEL1/RAD54B/RBBP8/WAS/MAD2L2/RNF138/RAD21L1/FIGNL1/H2AFX/RPA3/PARP1/RFWD3/PARPBP/MMS22L/TEX15/CHEK1/FANCB/BRCA1/XRCC3/RECQL4/FEN1/GINS4/BLM/RAD51AP1/MCM8/BRCA2/DMC1/CDC7/TONSL/XRCC2/RAD54L/POLQ/GINS2/AUNIP/CDC45
GO:0000724	GO:0000724	double-strand break repair via homologous recombination	117	-0.570732	-2.12794	0.00220751	0.0490018	0.0428501	3859	tags=43%, list=22%, signal=34%	RIF1/SMC6/RAD51D/LIG3/SFPQ/XRCC1/FIGN/RMI2/GEN1/RMI1/NABP1/RPA1/WRAP53/RPA4/RTEL1/RAD54B/RBBP8/WAS/MAD2L2/RNF138/RAD21L1/FIGNL1/H2AFX/RPA3/PARP1/RFWD3/PARPBP/MMS22L/TEX15/CHEK1/FANCB/BRCA1/XRCC3/RECQL4/FEN1/GINS4/BLM/RAD51AP1/MCM8/BRCA2/DMC1/CDC7/TONSL/XRCC2/RAD54L/POLQ/GINS2/AUNIP/CDC45
GO:0061982	GO:0061982	meiosis I cell cycle process	84	-0.520472	-1.82674	0.00221239	0.0490018	0.0428501	2328	tags=36%, list=13%, signal=31%	RAD54B/FANCM/CENPX/CDC25B/MEI1/NDC1/RAD21L1/CCNE1/CCNE2/TEX15/STAG3/AURKA/EME1/CDC25C/FBXO5/PSMC3IP/ESPL1/TOP2A/CKS2/PTTG1/BLM/HSPA2/DMC1/BRIP1/FANCD2/CDC25A/TRIP13/MND1/PLK1
GO:0007052	GO:0007052	mitotic spindle organization	106	-0.567829	-2.07855	0.00222717	0.0490018	0.0428501	4035	tags=48%, list=23%, signal=37%	MSTO1/CEP192/RAN/PTPA/NUP62/ARHGEF10/ZNF207/FLNA/INTS13/SPICE1/HNRNPU/SUN2/SMC1A/CLASP2/SMC3/CDC14B/TUBG1/STMN1/MZT1/TUBGCP3/RCC1/ANKRD53/GPSM2/BCCIP/FSD1/BORA/AURKA/STIL/KIF4A/NDC80/POC1A/RACGAP1/KIF11/PSRC1/SPC25/KIFC1/NEK2/CENPE/TACC3/TPX2/CCNB1/TTK/KIF23/WDR62/NUF2/MYBL2/AURKB/PRC1/PLK1/CDC20
GO:0044786	GO:0044786	cell cycle DNA replication	60	-0.640226	-2.13058	0.00223214	0.0490018	0.0428501	2321	tags=48%, list=13%, signal=42%	WDR18/ACD/TIPIN/PCNA/RPA3/POLA1/POLD3/DONSON/LIG1/POLD1/DNA2/DBF4B/RFC5/RFC4/GINS1/GMNN/ATAD5/FBXO5/FEN1/E2F8/POLA2/RFC2/BRCA2/RFC3/CDC7/CDT1/PRIM1/CDC45
GO:0006406	GO:0006406	mRNA export from nucleus	105	-0.520823	-1.90116	0.00223714	0.0490018	0.0428501	5220	tags=58%, list=30%, signal=41%	CHTOP/PCID2/SEH1L/FIP1L1/UPF1/THOC5/SRSF9/DHX38/RAE1/RNPS1/GLE1/THOC1/RBM8A/CPSF3/NUP43/CPSF1/U2AF1/EIF4E/POLR2D/NXT1/NCBP1/U2AF1/UPF3B/CPSF4/NUP62/SRSF3/MAGOHB/NUP153/AGFG1/U2AF2/HNRNPA2B1/SLBP/NUP54/NUP58/NUP205/THOC7/THOC6/NUP188/NUP50/NUP93/EIF4A3/NUP107/NUP37/NUP88/SRSF2/THOC3/NUP85/NUP160/DDX39A/EIF5A/MAGOH/ALYREF/SRSF1/U2AF1L4/NUP155/HHEX/SRSF7/NDC1/NUP35/NUP210
GO:0071427	GO:0071427	mRNA-containing ribonucleoprotein complex export from nucleus	105	-0.520823	-1.90116	0.00223714	0.0490018	0.0428501	5220	tags=58%, list=30%, signal=41%	CHTOP/PCID2/SEH1L/FIP1L1/UPF1/THOC5/SRSF9/DHX38/RAE1/RNPS1/GLE1/THOC1/RBM8A/CPSF3/NUP43/CPSF1/U2AF1/EIF4E/POLR2D/NXT1/NCBP1/U2AF1/UPF3B/CPSF4/NUP62/SRSF3/MAGOHB/NUP153/AGFG1/U2AF2/HNRNPA2B1/SLBP/NUP54/NUP58/NUP205/THOC7/THOC6/NUP188/NUP50/NUP93/EIF4A3/NUP107/NUP37/NUP88/SRSF2/THOC3/NUP85/NUP160/DDX39A/EIF5A/MAGOH/ALYREF/SRSF1/U2AF1L4/NUP155/HHEX/SRSF7/NDC1/NUP35/NUP210
GO:0007127	GO:0007127	meiosis I	80	-0.506062	-1.7659	0.00224215	0.0490018	0.0428501	2328	tags=36%, list=13%, signal=32%	RPA4/RAD54B/FANCM/CENPX/CDC25B/MEI1/NDC1/RAD21L1/CCNE1/CCNE2/TEX15/STAG3/AURKA/EME1/FBXO5/PSMC3IP/ESPL1/TOP2A/CKS2/PTTG1/BLM/HSPA2/DMC1/BRIP1/FANCD2/TRIP13/MND1/PLK1
GO:0051304	GO:0051304	chromosome separation	80	-0.676283	-2.35989	0.00224215	0.0490018	0.0428501	2207	tags=40%, list=13%, signal=35%	FANCM/NCAPH2/CENPX/NCAPD3/NCAPD2/EME1/XRCC3/NDC80/SPDL1/FBXO5/ESPL1/TOP2A/BUB1B/PTTG1/BLM/DUSP1/MAD2L1/CENPF/CENPE/TACC3/DLGAP5/CCNB1/NCAPH/TTK/CDC6/BUB1/CDT1/TRIP13/AURKB/PLK1/CDC20
GO:0006415	GO:0006415	translational termination	101	-0.551921	-2.00131	0.00224719	0.0490018	0.0428501	5762	tags=70%, list=33%, signal=48%	MRPL36/MRPS22/MRPS31/MRPL35/MRPL30/MRPL54/MTRF1L/MRPS27/MRPS11/MRPL48/MRPS25/MRPL53/MRPS16/MRPL16/MRPS34/MRPL24/MRPS15/GSPT1/UPF1/MRPS35/MRRF/MRPL15/MRPS21/MRPL21/MRPS30/GLE1/MRPL32/MRPS2/MRPL17/MRPL47/GADD45GIP1/MRPL18/MRPS5/MRPL14/MRPL19/MRPL51/ERAL1/MRPS18A/ETF1/MRPS26/CHCHD1/MRPL11/PTCD3/C12orf65/MRPL2/MRPL55/APEH/AURKAIP1/MRPL52/MRPL9/MRPL28/MRPS12/MRPL4/MRPL37/MRPS9/MRPL58/MRPS7/ABCE1/MRPL2…
GO:0070125	GO:0070125	mitochondrial translational elongation	88	-0.554181	-1.95073	0.00224719	0.0490018	0.0428501	5762	tags=70%, list=33%, signal=48%	MRPL36/MRPS22/MRPS31/MRPL35/MRPL30/MRPL54/MRPS27/MRPS11/MRPL48/MRPS25/MRPL53/MRPS16/MRPL16/MRPS34/MRPL24/MRPS15/MRPS35/MRPL15/MRPS21/MRPL21/MRPS30/MRPL32/TUFM/MRPS2/MRPL17/MRPL47/GADD45GIP1/MRPL18/MRPS5/MRPL14/MRPL19/MRPL51/ERAL1/MRPS18A/MRPS26/CHCHD1/MRPL11/PTCD3/MRPL2/TSFM/MRPL55/AURKAIP1/MRPL52/MRPL9/MRPL28/MRPS12/MRPL4/MRPL37/MRPS9/MRPL58/MRPS7/MRPL23/MRPL22/MRPL3/MRPL13/MRPS18C/MRPL39/MRPL20…
GO:0007098	GO:0007098	centrosome cycle	112	-0.510914	-1.88754	0.00225225	0.0490018	0.0428501	1821	tags=25%, list=10%, signal=23%	RBM14/CENPJ/C2CD3/SSX2IP/HAUS5/CHEK1/AURKA/STIL/SASS6/BRCA1/CEP152/XRCC3/POC1A/KIF11/CDK1/PCLAF/CCNF/BRCA2/HAUS8/NEK2/PLK4/CEP72/WDR62/XRCC2/SGO1/PLK1/CDK2
GO:0042274	GO:0042274	ribosomal small subunit biogenesis	62	-0.556522	-1.86122	0.00225734	0.0490018	0.0428501	5765	tags=68%, list=33%, signal=46%	SURF6/RPS7/RIOK1/RPS28/NOM1/DCAF13/MRPS11/KRI1/NGDN/NOL10/NOP14/RPS17/SRFBP1/ABT1/ERAL1/UTP6/TSR1/RRS1/EMG1/WDR46/TBL3/BMS1/HEATR1/RCL1/MRPS9/NPM1/MRPS7/RRP7BP/UTP25/LTV1/LSM6/NOB1/NAT10/NOL11/RRP7A/DHX37/BYSL/UTP4/UTP20/RPS10/PWP2
GO:0008033	GO:0008033	tRNA processing	121	-0.479502	-1.79113	0.00226244	0.0490018	0.0428501	5627	tags=53%, list=32%, signal=36%	ZBTB8OS/TRMT12/KARS/OSGEP/TSEN2/PUSL1/LCMT2/ALKBH1/SSB/PTCD1/TRIT1/AARS2/RPUSD4/ELAC2/PUS10/CDK5RAP1/DUS4L/ADAT2/TRDMT1/RPP38/DDX1/FARS2/RTCB/KIAA0391/TRMT1/DUS2/THUMPD2/ELP5/POP7/NSUN2/HSD17B10/TRMT44/ELP6/RPP25/TYW1B/TPRKB/OSGEPL1/ELP4/GTPBP3/RPP30/QTRT2/POP5/FTSJ1/TRMU/TRMT10A/TRMT61A/LSM6/TRMT6/DUS1L/RPP40/NAT10/QTRT1/DUS3L/POLR3K/PUS7/METTL1/TRMT9B/PUS1/ADAT3/CTU2/TSEN54/WDR4/POP1
GO:1901988	GO:1901988	negative regulation of cell cycle phase transition	179	-0.486901	-1.91658	0.00226244	0.0490018	0.0428501	2492	tags=28%, list=14%, signal=24%	TOPBP1/PRKDC/MAD2L2/RPL26/HMGA2/ARID3A/PLAGL1/PCNA/MIR138-1/RFWD3/TICRR/DONSON/CHEK1/AURKA/MUC1/BRCA1/CDC25C/EZH2/CCL2/XRCC3/NDC80/SPDL1/MIR29A/MYO16/FBXO5/E2F8/GTSE1/BUB1B/RBL1/CDK1/BLM/DUSP1/MAD2L1/CENPF/CLSPN/CCNB1/TTK/CDC6/BUB1/CDT1/TRIP13/E2F1/DTL/AURKB/ORC1/PLK1/CDK2/CDC20/SUSD2
GO:0006282	GO:0006282	regulation of DNA repair	111	-0.457871	-1.68665	0.00226757	0.0490018	0.0428501	3874	tags=34%, list=22%, signal=27%	RPA2/RIF1/UBE2V1/XRCC1/FIGN/EYA4/RMI2/DEK/MIR221/BABAM1/SETMAR/TRIM28/WRAP53/RTEL1/WAS/MAD2L2/HMGA2/HMGB1/NSD2/SLF1/USP1/PCNA/FIGNL1/H2AFX/PARP1/PARPBP/TEX15/TIMELESS/CHEK1/FANCB/BRCA1/DDX11/BLM/RAD51AP1/FOXM1/POLQ/AUNIP
GO:0032392	GO:0032392	DNA geometric change	75	-0.59307	-2.03988	0.00226757	0.0490018	0.0428501	3859	tags=48%, list=22%, signal=38%	ASCC3/RUVBL1/XRCC5/XRCC6/MNAT1/HNRNPA2B1/CHD1L/TWNK/SUPV3L1/HMGB3/RPA1/RPA4/RTEL1/RAD54B/RUVBL2/HMGB1/ERCC2/PIF1/MCM6/DNA2/DDX11/GINS1/HMGB2/RECQL4/TOP2A/GINS4/BLM/BRIP1/DDX12P/MCM7/MCM2/MCM4/RAD54L/GINS2/CDC45
GO:0032508	GO:0032508	DNA duplex unwinding	65	-0.590904	-1.99242	0.00226757	0.0490018	0.0428501	3859	tags=48%, list=22%, signal=37%	ASCC3/RUVBL1/XRCC5/XRCC6/MNAT1/CHD1L/TWNK/SUPV3L1/RPA1/RPA4/RTEL1/RAD54B/RUVBL2/ERCC2/PIF1/MCM6/DNA2/DDX11/GINS1/RECQL4/TOP2A/GINS4/BLM/BRIP1/DDX12P/MCM7/MCM2/MCM4/GINS2/CDC45
GO:0033045	GO:0033045	regulation of sister chromatid segregation	75	-0.690132	-2.37372	0.00226757	0.0490018	0.0428501	879	tags=33%, list=5%, signal=32%	XRCC3/NDC80/SPDL1/FBXO5/FEN1/ESPL1/BUB1B/PTTG1/DUSP1/MAD2L1/CENPF/CENPE/TACC3/DLGAP5/CDCA5/CCNB1/TTK/CDC6/BUB1/CDT1/TRIP13/AURKB/PLK1/CDC20
GO:0033047	GO:0033047	regulation of mitotic sister chromatid segregation	65	-0.701132	-2.3641	0.00226757	0.0490018	0.0428501	850	tags=34%, list=5%, signal=32%	NDC80/SPDL1/FBXO5/ESPL1/BUB1B/PTTG1/DUSP1/MAD2L1/CENPF/CENPE/TACC3/DLGAP5/CCNB1/TTK/CDC6/BUB1/CDT1/TRIP13/AURKB/PLK1/CDC20
GO:0070126	GO:0070126	mitochondrial translational termination	89	-0.546141	-1.92438	0.00226757	0.0490018	0.0428501	5762	tags=70%, list=33%, signal=47%	MRPL36/MRPS22/MRPS31/MRPL35/MRPL30/MRPL54/MTRF1L/MRPS27/MRPS11/MRPL48/MRPS25/MRPL53/MRPS16/MRPL16/MRPS34/MRPL24/MRPS15/MRPS35/MRRF/MRPL15/MRPS21/MRPL21/MRPS30/MRPL32/MRPS2/MRPL17/MRPL47/GADD45GIP1/MRPL18/MRPS5/MRPL14/MRPL19/MRPL51/ERAL1/MRPS18A/MRPS26/CHCHD1/MRPL11/PTCD3/MRPL2/MRPL55/AURKAIP1/MRPL52/MRPL9/MRPL28/MRPS12/MRPL4/MRPL37/MRPS9/MRPL58/MRPS7/MRPL23/MRPL22/MRPL3/MRPL13/MRPS18C/MRPL39/MRPL…
GO:1901989	GO:1901989	positive regulation of cell cycle phase transition	81	-0.646725	-2.25562	0.00226757	0.0490018	0.0428501	1230	tags=31%, list=7%, signal=29%	DBF4B/CDC25C/EZH2/MIR29A/ATAD5/RECQL4/FBXO5/ESPL1/CDK1/HSPA2/MTBP/CDC7/DLGAP5/CDCA5/CCNB1/CDC6/CDC25A/UBE2C/CDT1/WNT10B/FAM83D/DTL/CCND3/CDC45
GO:0006275	GO:0006275	regulation of DNA replication	98	-0.56924	-2.04428	0.0022779	0.0490018	0.0428501	2213	tags=32%, list=13%, signal=28%	GLI2/WDR18/TIPIN/PCNA/DBF4/TICRR/DONSON/TIMELESS/DNA2/ESCO2/DBF4B/RFC5/RFC4/GMNN/ATAD5/RECQL4/FBXO5/E2F8/CDK1/BLM/RFC2/DSCC1/RFC3/CDC7/CDC6/CHTF18/CDT1/CCNA2/CDK2/ID3
GO:0045132	GO:0045132	meiotic chromosome segregation	66	-0.648826	-2.19059	0.0022779	0.0490018	0.0428501	2095	tags=44%, list=12%, signal=39%	NCAPH2/CENPX/MEI1/NDC1/RAD21L1/CCNE1/CCNE2/SGO2/TEX15/SMC2/STAG3/EME1/SMC4/ESPL1/TOP2A/BUB1B/PTTG1/BLM/DMC1/BRIP1/FANCD2/NCAPH/TTK/BUB1/TRIP13/NUF2/SGO1/PLK1
GO:0034502	GO:0034502	protein localization to chromosome	77	-0.641164	-2.21717	0.00228311	0.0490018	0.0428501	3625	tags=53%, list=21%, signal=42%	SGF29/BUB3/CCT7/ZW10/H2AFY2/CCT2/CCT5/GNL3/LRWD1/RAD21/CCT3/CCT4/CCT6A/RPA1/CENPQ/PINX1/MSH2/WRAP53/TCP1/DKC1/ACD/RUVBL2/SLF1/ESCO2/EZH2/NDC80/SPDL1/BUB1B/KNL1/CDK1/MCM8/BRCA2/CENPA/MTBP/HASPIN/CDCA5/TTK/CDT1/AURKB/PLK1
GO:0031023	GO:0031023	microtubule organizing center organization	123	-0.491645	-1.84036	0.00228833	0.0490018	0.0428501	1821	tags=41%, list=10%, signal=37%	MCPH1/E2F4/CEP295/HAUS3/HAUS6/CEP192/JHY/NUP62/ARHGEF10/HAUS1/SPICE1/CEP131/HAUS4/GEN1/NPM1/CLASP2/XPO1/RTTN/CEP85/CHORDC1/CCP110/RBM14/CENPJ/C2CD3/SSX2IP/HAUS5/CHEK1/AURKA/CALML4/STIL/SASS6/BRCA1/CEP152/XRCC3/POC1A/KIF11/CDK1/PCLAF/CCNF/BRCA2/HAUS8/NEK2/PLK4/CEP72/WDR62/XRCC2/SGO1/PLK1/CDK2
GO:0051983	GO:0051983	regulation of chromosome segregation	94	-0.668554	-2.3717	0.00228833	0.0490018	0.0428501	953	tags=33%, list=5%, signal=31%	DDX11/XRCC3/NDC80/SPDL1/FBXO5/FEN1/ESPL1/RACGAP1/BUB1B/PTTG1/DUSP1/MKI67/MAD2L1/NEK2/CENPF/KIF2C/CENPE/TACC3/DLGAP5/CDCA5/CCNB1/TTK/CDC6/BUB1/CDT1/TRIP13/SPAG5/AURKB/PLK1/CDC20
GO:2001251	GO:2001251	negative regulation of chromosome organization	123	-0.529529	-1.98217	0.00228833	0.0490018	0.0428501	3632	tags=37%, list=21%, signal=29%	XRCC5/XRCC1/HNRNPU/BUB3/ZW10/MNAT1/NAA10/GEN1/RAD21/ANAPC15/SETMAR/PINX1/RTEL1/MTF2/TET1/MAD2L2/NAT10/ACD/NOC2L/PARP1/PIF1/DNMT1/BRCA1/XRCC3/NDC80/SPDL1/FBXO5/ESPL1/TOP2A/BUB1B/PTTG1/DUSP1/MAD2L1/CENPF/ATAD2/CCNB1/TTK/MCM2/BUB1/CDT1/TRIP13/AURKB/PLK1/CDC20
GO:0051303	GO:0051303	establishment of chromosome localization	67	-0.644252	-2.17139	0.00230415	0.0490018	0.0428501	1582	tags=30%, list=9%, signal=27%	RAD21L1/NDC80/SPDL1/KIF22/KIF18A/KIF14/PSRC1/KIFC1/CENPF/KIF2C/CENPE/DLGAP5/CDCA8/CDCA5/CCNB1/CDT1/NUF2/SPAG5/FAM83D
GO:1901992	GO:1901992	positive regulation of mitotic cell cycle phase transition	69	-0.64434	-2.18564	0.00230415	0.0490018	0.0428501	1230	tags=32%, list=7%, signal=30%	DBF4B/CDC25C/MIR29A/RECQL4/FBXO5/ESPL1/CDK1/HSPA2/MTBP/CDC7/DLGAP5/CDCA5/CCNB1/CDC6/CDC25A/UBE2C/CDT1/WNT10B/DTL/CCND3/CDC45
GO:0050657	GO:0050657	nucleic acid transport	183	-0.418295	-1.64371	0.00230947	0.0490018	0.0428501	5643	tags=54%, list=32%, signal=37%	MVP/CPSF2/DHX9/SSB/RBM26/DDX19A/HNRNPA1/NUP98/CHTOP/XPO7/PCID2/SEH1L/KHDRBS1/CKAP5/FIP1L1/UPF1/THOC5/SRSF9/DHX38/RAE1/RNPS1/MYO1C/GLE1/THOC1/RBM8A/CPSF3/NUP43/CPSF1/U2AF1/FLOT1/SEC13/EIF4E/POLR2D/NXT1/MRPL18/ZNF593/LRPPRC/NCBP1/U2AF1/UPF3B/CPSF4/RAN/KHSRP/NUP62/RRS1/SFPQ/IGF2BP1/SRSF3/HNRNPU/MAGOHB/NUP153/AGFG1/U2AF2/HNRNPA2B1/SLBP/NUP54/NUP58/HNRNPA3/RFTN1/NUP205/THOC7/THOC6/XPO5/NUP188/NPM1/SID…
GO:0050658	GO:0050658	RNA transport	183	-0.418295	-1.64371	0.00230947	0.0490018	0.0428501	5643	tags=54%, list=32%, signal=37%	MVP/CPSF2/DHX9/SSB/RBM26/DDX19A/HNRNPA1/NUP98/CHTOP/XPO7/PCID2/SEH1L/KHDRBS1/CKAP5/FIP1L1/UPF1/THOC5/SRSF9/DHX38/RAE1/RNPS1/MYO1C/GLE1/THOC1/RBM8A/CPSF3/NUP43/CPSF1/U2AF1/FLOT1/SEC13/EIF4E/POLR2D/NXT1/MRPL18/ZNF593/LRPPRC/NCBP1/U2AF1/UPF3B/CPSF4/RAN/KHSRP/NUP62/RRS1/SFPQ/IGF2BP1/SRSF3/HNRNPU/MAGOHB/NUP153/AGFG1/U2AF2/HNRNPA2B1/SLBP/NUP54/NUP58/HNRNPA3/RFTN1/NUP205/THOC7/THOC6/XPO5/NUP188/NPM1/SID…
GO:1903046	GO:1903046	meiotic cell cycle process	140	-0.534157	-2.03575	0.00230947	0.0490018	0.0428501	2328	tags=37%, list=13%, signal=32%	RAD54B/SPDYA/FANCM/NCAPH2/CENPX/CDC25B/GPR3/NCAPD3/MEI1/NDC1/RAD21L1/NCAPD2/FIGNL1/CCNE1/FBXO43/CCNE2/SGO2/TEX15/SMC2/STAG3/AURKA/EME1/CDC25C/SMC4/KIF18A/FBXO5/PSMC3IP/ASPM/ESPL1/TOP2A/CKS2/BUB1B/PTTG1/BLM/HSPA2/DMC1/BRIP1/FANCD2/NCAPH/TTK/CDC25A/EXO1/BUB1/TRIP13/FANCA/MND1/NUF2/SGO1/PLK1/CDC20/PDE3A
GO:2000779	GO:2000779	regulation of double-strand break repair	70	-0.519665	-1.76463	0.00230947	0.0490018	0.0428501	3874	tags=39%, list=22%, signal=30%	RPA2/RIF1/FIGN/RMI2/DEK/MIR221/SETMAR/WRAP53/RTEL1/WAS/MAD2L2/HMGA2/NSD2/SLF1/FIGNL1/PARPBP/TEX15/TIMELESS/CHEK1/FANCB/DDX11/BLM/RAD51AP1/FOXM1/POLQ/AUNIP
GO:0007093	GO:0007093	mitotic cell cycle checkpoint	158	-0.487081	-1.89143	0.00231481	0.0490018	0.0428501	2475	tags=30%, list=14%, signal=26%	MSH2/TOPBP1/PRKDC/MAD2L2/RPL26/HMGA2/ARID3A/ZWILCH/PLAGL1/TIPIN/PCNA/RFWD3/RAD9B/TICRR/DONSON/AURKA/MUC1/EME1/BRCA1/CDC25C/XRCC3/NDC80/SPDL1/E2F8/KNTC1/TOP2A/GTSE1/BUB1B/CDK1/BLM/DUSP1/MAD2L1/CENPF/CLSPN/CCNB1/TTK/CDC6/ZWINT/BUB1/CDT1/TRIP13/E2F1/AURKB/ORC1/PLK1/CDK2/CDC20
GO:0006399	GO:0006399	tRNA metabolic process	182	-0.437136	-1.71559	0.00232019	0.0490018	0.0428501	5627	tags=51%, list=32%, signal=35%	ZBTB8OS/TRMT12/KARS/RARS/OSGEP/TSEN2/PUSL1/LCMT2/ALKBH1/SSB/PTCD1/AIMP1/TRIT1/AARS2/RPUSD4/ELAC2/PUS10/CDK5RAP1/DUS4L/ADAT2/GTF3C3/TRDMT1/SLFN13/RPP38/DDX1/PPA1/GTF3C6/FARS2/RTCB/KIAA0391/EXOSC7/TRMT1/NARS2/DUS2/YARS2/AIMP2/GTF3C5/TARS2/FARSA/THUMPD2/ELP5/POP7/NSUN2/HARS/HSD17B10/TRMT44/ELP6/RPP25/DARS2/TYW1B/TPRKB/LARS2/OSGEPL1/ELP4/GTPBP3/EARS2/RPP30/QTRT2/CARS2/POP5/FTSJ1/FARSB/TRMU/SARS2/TRMT…
GO:0007051	GO:0007051	spindle organization	157	-0.490118	-1.8982	0.00232558	0.0490018	0.0428501	4188	tags=43%, list=24%, signal=33%	HAUS6/HDAC3/TBCE/MSTO1/CEP192/RAN/PTPA/NUP62/ARHGEF10/ZNF207/HAUS1/FLNA/INTS13/SPICE1/HNRNPU/SUN2/HAUS4/NTMT1/SMC1A/CLASP2/SMC3/CDC14B/TUBG1/EZR/STMN1/MZT1/TRIM36/TUBGCP3/RCC1/ANKRD53/GPSM2/BCCIP/FSD1/BORA/HAUS5/AURKA/KNSTRN/STIL/KIF4A/NDC80/POC1A/FBXO5/ASPM/ESPL1/RACGAP1/KIF11/HAUS8/PSRC1/SPC25/KIFC1/NEK2/CENPE/TACC3/TPX2/CCNB1/CEP72/TTK/KIF23/WDR62/NUF2/SPAG5/MYBL2/AURKB/AUNIP/PRC1/PLK1/CDC20
GO:0050000	GO:0050000	chromosome localization	68	-0.639559	-2.15611	0.00232558	0.0490018	0.0428501	1582	tags=29%, list=9%, signal=27%	RAD21L1/NDC80/SPDL1/KIF22/KIF18A/KIF14/PSRC1/KIFC1/CENPF/KIF2C/CENPE/DLGAP5/CDCA8/CDCA5/CCNB1/CDT1/NUF2/SPAG5/FAM83D
GO:0031570	GO:0031570	DNA integrity checkpoint	154	-0.474916	-1.83395	0.002331	0.0490018	0.0428501	2457	tags=27%, list=14%, signal=24%	TOPBP1/PRKDC/RPA4/DOT1L/RPL26/HMGA2/ARID3A/PLAGL1/CRY1/TIPIN/PCNA/H2AFX/RFWD3/RAD9B/TICRR/DONSON/TIMELESS/CHEK1/AURKA/MUC1/DNA2/EME1/BRCA1/CDC25C/E2F8/TOP2A/GTSE1/CDK1/BLM/BRIP1/WDR76/CLSPN/CCNB1/CDC6/CDT1/E2F1/DTL/ORC1/PLK1/CDK2/CDC45
GO:0071426	GO:0071426	ribonucleoprotein complex export from nucleus	124	-0.506933	-1.89627	0.002331	0.0490018	0.0428501	5220	tags=57%, list=30%, signal=41%	CHTOP/PCID2/SEH1L/FIP1L1/UPF1/THOC5/SRSF9/DHX38/RAE1/RNPS1/GLE1/THOC1/RBM8A/CPSF3/NUP43/CPSF1/U2AF1/EIF4E/POLR2D/NXT1/ZNF593/NCBP1/U2AF1/UPF3B/CPSF4/RAN/NUP62/RRS1/SRSF3/MAGOHB/NUP153/AGFG1/U2AF2/HNRNPA2B1/SLBP/NUP54/NUP58/NUP205/THOC7/THOC6/NUP188/NPM1/NUP50/NUP93/ABCE1/EIF4A3/XPO1/NUP107/NUP37/NUP88/LTV1/SRSF2/THOC3/PA2G4/NUP85/NUP160/DDX39A/EIF5A/MAGOH/NOL6/BCCIP/ALYREF/SRSF1/U2AF1L4/NUP155/HH…
GO:0006611	GO:0006611	protein export from nucleus	173	-0.432273	-1.69367	0.00233645	0.0490018	0.0428501	5220	tags=53%, list=30%, signal=37%	CHTOP/XPO7/PCID2/SEH1L/RANGAP1/PARK7/PRKACA/FIP1L1/UPF1/THOC5/SRSF9/DHX38/RAE1/RNPS1/GLE1/THOC1/RBM8A/CPSF3/NUP43/CDK5/CPSF1/U2AF1/XPO4/EIF4E/POLR2D/NXT1/ZNF593/NCBP1/U2AF1/UPF3B/EMD/CPSF4/ANP32B/RAN/YWHAE/NUP62/RRS1/SRSF3/MAGOHB/NUP153/AGFG1/U2AF2/HNRNPA2B1/SLBP/NUP54/NUP58/CAMK1/NUP205/THOC7/THOC6/XPO5/NUP188/NPM1/NUP50/NUP93/AHCYL1/ABCE1/EIF4A3/XPO1/NUP107/NUP37/NUP88/LTV1/SRSF2/TGFB1/THOC3/PA…
GO:0051783	GO:0051783	regulation of nuclear division	173	-0.568492	-2.22739	0.00233645	0.0490018	0.0428501	1429	tags=28%, list=8%, signal=26%	FBXO43/CCNE2/BORA/IGF1/CHEK1/AURKA/CDC25C/KIF20B/XRCC3/NDC80/SPDL1/FBXO5/ESPL1/KNTC1/KIF11/BUB1B/PTTG1/CCNF/IGF2/DUSP1/MKI67/MAD2L1/NEK2/CENPF/CCNB2/MTBP/CENPE/TACC3/DLGAP5/CDCA5/CCNB1/TTK/CDC6/UBE2C/BUB1/CDT1/TRIP13/ANLN/CCNA2/AURKB/PKMYT1/NUSAP1/CCND3/PLK1/CDC20/PDE3A/IL1B
GO:0140013	GO:0140013	meiotic nuclear division	126	-0.527968	-1.97547	0.00233645	0.0490018	0.0428501	2328	tags=37%, list=13%, signal=33%	RAD54B/SPDYA/FANCM/NCAPH2/CENPX/CDC25B/GPR3/MEI1/NDC1/RAD21L1/FIGNL1/CCNE1/FBXO43/CCNE2/SGO2/TEX15/SMC2/STAG3/AURKA/EME1/SMC4/KIF18A/FBXO5/PSMC3IP/ASPM/ESPL1/TOP2A/CKS2/BUB1B/PTTG1/BLM/HSPA2/DMC1/BRIP1/FANCD2/NCAPH/TTK/BUB1/TRIP13/FANCA/MND1/NUF2/SGO1/PLK1/CDC20/PDE3A
GO:1901991	GO:1901991	negative regulation of mitotic cell cycle phase transition	164	-0.483978	-1.88545	0.00233645	0.0490018	0.0428501	2492	tags=29%, list=14%, signal=25%	TOPBP1/PRKDC/MAD2L2/RPL26/HMGA2/ARID3A/PLAGL1/PCNA/MIR138-1/RFWD3/TICRR/DONSON/AURKA/MUC1/BRCA1/CDC25C/EZH2/CCL2/XRCC3/NDC80/SPDL1/MIR29A/MYO16/FBXO5/E2F8/GTSE1/BUB1B/RBL1/CDK1/BLM/DUSP1/MAD2L1/CENPF/CLSPN/CCNB1/TTK/CDC6/BUB1/CDT1/TRIP13/E2F1/AURKB/ORC1/PLK1/CDK2/CDC20
GO:0000723	GO:0000723	telomere maintenance	139	-0.47391	-1.80357	0.00234192	0.0490018	0.0428501	3859	tags=40%, list=22%, signal=31%	RIF1/SMC6/RAD51D/HSP90AA1/XRCC5/XRCC6/XRCC1/HNRNPU/CCT7/HSP90AB1/HNRNPA2B1/CCT2/CCT5/GNL3/DCLRE1B/NHP2/CCT3/CCT4/CCT6A/RPA1/PINX1/PRKDC/WRAP53/TCP1/RPA4/RTEL1/HNRNPD/DKC1/TELO2/NAT10/ACD/PCNA/RPA3/PARP1/PIF1/CCNE1/POLA1/CCNE2/POLD3/POLD1/DNA2/RFC5/RFC4/XRCC3/RECQL4/FEN1/POLA2/BLM/RFC2/NEK2/RFC3/EXO1/PRIM1/AURKB
GO:0071166	GO:0071166	ribonucleoprotein complex localization	125	-0.509107	-1.90394	0.00234192	0.0490018	0.0428501	5220	tags=58%, list=30%, signal=41%	CHTOP/PCID2/SEH1L/FIP1L1/UPF1/THOC5/SRSF9/DHX38/RAE1/RNPS1/GLE1/THOC1/RBM8A/CPSF3/NUP43/CPSF1/U2AF1/EIF4E/POLR2D/NXT1/ZNF593/NCBP1/U2AF1/UPF3B/CPSF4/RAN/NUP62/RRS1/SRSF3/MAGOHB/NUP153/AGFG1/U2AF2/HNRNPA2B1/SLBP/NUP54/NUP58/NUP205/THOC7/PRPF31/THOC6/NUP188/NPM1/NUP50/NUP93/ABCE1/EIF4A3/XPO1/NUP107/NUP37/NUP88/LTV1/SRSF2/THOC3/PA2G4/NUP85/NUP160/DDX39A/EIF5A/MAGOH/NOL6/BCCIP/ALYREF/SRSF1/U2AF1L4/NU…
GO:0090501	GO:0090501	RNA phosphodiester bond hydrolysis	125	-0.450281	-1.68395	0.00234192	0.0490018	0.0428501	6033	tags=56%, list=34%, signal=37%	DROSHA/RRP36/ERI3/EXOSC1/RPSA/RNASEH2B/TSN/CPSF2/DBR1/TSEN2/ERI2/ZC3H12A/KRI1/EXOSC10/ELAC2/SAMHD1/EDC3/FIP1L1/SLFN13/RPP38/NOL9/NOP14/ISG20L2/LACTB2/CPSF3/CPSF1/POLR2I/KIAA0391/EXOSC7/DCPS/ABT1/RNASEH1/NCBP1/CNOT7/SND1/CPSF4/POP7/RRS1/RPP25/AGO1/CSTF2/ERI1/NHP2/RCL1/USB1/RPP30/ANG/POP5/PNPT1/NOB1/EXOSC3/RPP40/ZNRD1/EXOSC4/ISG20/POLR3K/MOV10/TOE1/BOP1/UTP20/TSEN54/NOCT/EXOSC2/EXOSC5/POP1/EXOSC9/F…
GO:1902749	GO:1902749	regulation of cell cycle G2/M phase transition	161	-0.514845	-1.99572	0.00234192	0.0490018	0.0428501	1821	tags=24%, list=10%, signal=22%	CENPJ/CDC25B/TICRR/STOX1/HAUS5/DONSON/CHEK1/AURKA/DBF4B/BRCA1/CDC25C/CEP152/ATAD5/RECQL4/FBXO5/GTSE1/CDK1/KIF14/BLM/HSPA2/HAUS8/NEK2/PLK4/CENPF/HMMR/CDC7/CLSPN/TPX2/CCNB1/CEP72/CDC6/CDC25A/WNT10B/DTL/AURKB/ORC1/PLK1/CDK2
GO:1902850	GO:1902850	microtubule cytoskeleton organization involved in mitosis	125	-0.546905	-2.0453	0.00234192	0.0490018	0.0428501	4035	tags=46%, list=23%, signal=36%	MSTO1/CEP192/RAN/PTPA/NUP62/ARHGEF10/ZNF207/FLNA/INTS13/SPICE1/HNRNPU/DYNLT1/ZW10/SUN2/SMC1A/CLASP2/SMC3/CDC14B/TUBG1/STMN1/MZT1/TUBGCP3/RCC1/ANKRD53/GPSM2/BCCIP/FSD1/BORA/SAPCD2/AURKA/STIL/KIF4A/NDC80/POC1A/SPDL1/ESPL1/RACGAP1/KIF11/PSRC1/SPC25/KIFC1/NEK2/CENPA/CENPE/TACC3/TPX2/CCNB1/TTK/KIF23/WDR62/NUF2/MYBL2/AURKB/NUSAP1/PRC1/PLK1/CDC20
GO:0000819	GO:0000819	sister chromatid segregation	170	-0.653988	-2.55128	0.00234742	0.0490018	0.0428501	1671	tags=35%, list=9%, signal=32%	NCAPD3/INCENP/RAD21L1/NCAPD2/DSN1/SGO2/SMC2/KNSTRN/ESCO2/KIF4A/DDX11/SMC4/XRCC3/NDC80/SPDL1/KIF22/KIF18A/NCAPG/FBXO5/FEN1/ESPL1/TOP2A/RACGAP1/BUB1B/PTTG1/KIF14/PSRC1/DUSP1/KIFC1/MAD2L1/NEK2/DSCC1/CENPF/KIF2C/CENPE/HASPIN/DDX12P/TACC3/DLGAP5/CDCA8/CDCA5/CCNB1/NCAPH/TTK/KIF23/CDC6/ZWINT/BUB1/CDT1/TRIP13/NUF2/SPAG5/KIF18B/AURKB/SGO1/NUSAP1/PRC1/PLK1/CDC20
GO:0006405	GO:0006405	RNA export from nucleus	132	-0.498177	-1.87713	0.00234742	0.0490018	0.0428501	5643	tags=60%, list=32%, signal=41%	CPSF2/DHX9/SSB/RBM26/HNRNPA1/NUP98/CHTOP/PCID2/SEH1L/KHDRBS1/FIP1L1/UPF1/THOC5/SRSF9/DHX38/RAE1/RNPS1/GLE1/THOC1/RBM8A/CPSF3/NUP43/CPSF1/U2AF1/EIF4E/POLR2D/NXT1/ZNF593/NCBP1/U2AF1/UPF3B/CPSF4/RAN/NUP62/RRS1/SRSF3/MAGOHB/NUP153/AGFG1/U2AF2/HNRNPA2B1/SLBP/NUP54/NUP58/NUP205/THOC7/THOC6/XPO5/NUP188/NPM1/NUP50/NUP93/ABCE1/EIF4A3/XPO1/NUP107/NUP37/NUP88/LTV1/SRSF2/THOC3/PA2G4/NUP85/NUP160/DDX39A/EIF5A…
GO:0007088	GO:0007088	regulation of mitotic nuclear division	159	-0.587321	-2.27614	0.00234742	0.0490018	0.0428501	1269	tags=29%, list=7%, signal=27%	CCNE2/BORA/IGF1/CHEK1/AURKA/CDC25C/KIF20B/XRCC3/NDC80/SPDL1/FBXO5/ESPL1/KNTC1/KIF11/BUB1B/PTTG1/CCNF/IGF2/DUSP1/MKI67/MAD2L1/NEK2/CENPF/CCNB2/MTBP/CENPE/TACC3/DLGAP5/CDCA5/CCNB1/TTK/CDC6/UBE2C/BUB1/CDT1/TRIP13/ANLN/CCNA2/AURKB/PKMYT1/NUSAP1/CCND3/PLK1/CDC20/IL1B
GO:0009451	GO:0009451	RNA modification	146	-0.413106	-1.58079	0.00234742	0.0490018	0.0428501	5818	tags=50%, list=33%, signal=34%	APOBEC3D/RBM15/NSUN6/TRMT12/OSGEP/PUSL1/LCMT2/ALKBH1/SSB/RPUSD1/NAF1/TFB1M/FTSJ3/NSUN5P1/TRIT1/DIMT1/AARS2/FDXACB1/RPUSD4/PUS10/CDK5RAP1/DUS4L/METTL3/ADAT2/TRDMT1/RPUSD2/MRM2/TRMT1/DUS2/GAR1/TGS1/THUMPD2/ELP5/NOP2/TRMT2A/NSUN2/HSD17B10/TRMT44/EMG1/ELP6/RPUSD3/TPRKB/HENMT1/OSGEPL1/ELP4/GTPBP3/TRUB2/NHP2/QTRT2/FTSJ1/TRMU/TFB2M/TRMT10A/NSUN5/TRMT61A/TRMT6/DUS1L/DKC1/NAT10/QTRT1/DUS3L/PUS7/METTL1/TRM…
GO:0031123	GO:0031123	RNA 3'-end processing	132	-0.419499	-1.58067	0.00234742	0.0490018	0.0428501	6583	tags=63%, list=37%, signal=40%	TRMT10C/ZC3H14/CCNT1/INTS6/ZC3H3/ELAC1/CTR9/NUDT21/LEO1/DDX39B/CPSF7/PABPN1/TRNT1/SRSF4/TENT4B/PAF1/ERI3/RPSA/INTS7/CPSF2/PABPC1L/SSB/PTCD1/CHTOP/ELAC2/NELFE/MTPAP/FIP1L1/LSM11/THOC5/SRSF9/DHX38/CSTF1/ZNF473/CPEB3/RNPS1/THOC1/RBM8A/CPSF3/CPSF1/U2AF1/INTS1/EXOSC7/POLR2D/NCBP1/U2AF1/UPF3B/CPSF4/HSD17B10/SRSF3/MAGOHB/U2AF2/SLBP/CSTF2/ERI1/THOC7/THOC6/SUPV3L1/USB1/AHCYL1/EIF4A3/PNPT1/SRSF2/THOC3/EXOS…
GO:0140053	GO:0140053	mitochondrial gene expression	159	-0.487622	-1.88976	0.00234742	0.0490018	0.0428501	5827	tags=63%, list=33%, signal=43%	TRMT5/MRPL34/MRPL36/MRPS22/MRPS31/MRPL35/PRKAA1/MRPL30/ALKBH1/MRPL54/MTRF1L/MRPS27/POLRMT/MRPS11/MRPL48/MRPS25/MRPL53/MTIF2/MRPS16/MRPL16/MRPS34/TRIT1/AARS2/MRPL24/RPUSD4/ELAC2/MRPS15/CDK5RAP1/MRPS35/MRRF/MRPL15/MRPS21/MTG2/MRPL21/MRPS30/MRPL32/TUFM/MRPS2/MRPL17/TFAM/MRPL47/KIAA0391/GADD45GIP1/FASTKD3/MRPL18/YARS2/MRPS5/MRPL14/MRPL19/TARS2/LRPPRC/MRPL51/ERAL1/MRPS18A/UQCC2/MRPS26/CHCHD1/MTERF3/MR…
GO:0000910	GO:0000910	cytokinesis	141	-0.430653	-1.6373	0.00235294	0.0490018	0.0428501	2422	tags=24%, list=14%, signal=21%	STMN1/SNX18/TRIM36/ANKRD53/MYO19/CCP110/ECT2/CENPV/CDC25B/CKAP2/FSD1/INCENP/CIT/SEPT4/AURKA/KIF4A/KIF20B/E2F8/ESPL1/RACGAP1/KIF14/BRCA2/KIF20A/CENPA/CEP55/KIF23/CDC6/CDT1/ANLN/AURKB/NUSAP1/PRC1/PLK1
GO:0051054	GO:0051054	positive regulation of DNA metabolic process	198	-0.477599	-1.91331	0.00235294	0.0490018	0.0428501	3647	tags=35%, list=21%, signal=28%	XRCC5/XRCC1/CCT7/HSP90AB1/HNRNPA2B1/CCT2/EREG/EYA4/FAF1/CCT5/GNL3/CDC42/FGF2/CCT3/CCT4/PRKCD/BABAM1/SETMAR/CCT6A/TRIM28/TGFB1/MSH2/WRAP53/UNG/TCP1/RTEL1/EXOSC3/HNRNPD/DKC1/WAS/STOML2/MAD2L2/GLI2/ACD/HMGB1/ERCC2/NSD2/SLF1/PCNA/DBF4/CLCF1/H2AFX/PARP1/DNMT1/TIMELESS/DNA2/FANCB/DBF4B/RFC5/BRCA1/RFC4/DDX11/ATAD5/RECQL4/E2F8/CDK1/BLM/RFC2/FOXM1/NEK2/DSCC1/RFC3/CDC7/CHTF18/CDT1/AURKB/CDK2/GREM1/FGFR4
GO:0051168	GO:0051168	nuclear export	187	-0.423501	-1.67109	0.00235294	0.0490018	0.0428501	5238	tags=51%, list=30%, signal=36%	NUP98/CHTOP/XPO7/PCID2/SEH1L/KHDRBS1/RANGAP1/PARK7/PRKACA/FIP1L1/UPF1/THOC5/SRSF9/DHX38/RAE1/RNPS1/GLE1/THOC1/RBM8A/CPSF3/NUP43/CDK5/CPSF1/U2AF1/XPO4/EIF4E/POLR2D/NXT1/ZNF593/LSG1/NCBP1/U2AF1/UPF3B/EMD/CPSF4/ANP32B/RAN/YWHAE/NUP62/RRS1/MALT1/SRSF3/RITA1/MAGOHB/NUP153/AGFG1/U2AF2/HNRNPA2B1/SLBP/NUP54/NUP58/CAMK1/NUP205/THOC7/THOC6/XPO5/NUP188/NPM1/NUP50/NUP93/AHCYL1/ABCE1/EIF4A3/XPO1/NUP107/NUP37/…
GO:0051321	GO:0051321	meiotic cell cycle	185	-0.478713	-1.88328	0.00235294	0.0490018	0.0428501	2328	tags=39%, list=13%, signal=34%	RAD21/MASTL/ACTR3/RMI1/SMC3/TUBG1/WNT5A/RPA1/MOV10L1/RPA4/RAD54B/RBBP8/TUBGCP3/SPDYA/FANCM/NCAPH2/CENPX/CDC25B/GPR3/PIWIL3/NCAPD3/MEI1/NDC1/RAD21L1/NCAPD2/FIGNL1/H2AFX/CCNE1/FBXO43/CCNE2/SGO2/TEX15/SMC2/STAG3/AURKA/EME1/CDC25C/SMC4/KIF18A/FBXO5/PSMC3IP/ASPM/ESPL1/TOP2A/CKS2/BUB1B/PTTG1/BLM/HSPA2/DMC1/DUSP1/NEK2/BRIP1/FANCD2/NCAPH/TTK/CDC25A/XRCC2/EXO1/BUB1/TRIP13/FANCA/MND1/NUF2/RAD54L/PKMYT1/SGO…
GO:2001020	GO:2001020	regulation of response to DNA damage stimulus	198	-0.409359	-1.63993	0.00235294	0.0490018	0.0428501	3874	tags=31%, list=22%, signal=25%	RPA2/RIF1/UBE2V1/XRCC1/MSX1/RINT1/FIGN/SNAI2/EYA4/RMI2/DEK/MIR221/IER3/PRKCD/BABAM1/SMYD2/SETMAR/TRIM28/SNAI1/WRAP53/RPA4/RTEL1/EEF1E1/MIF/WAS/MAD2L2/RPL26/HMGA2/HMGB1/CRY1/NSD2/SLF1/USP1/PCNA/FIGNL1/H2AFX/BCL2L12/PARP1/RFWD3/PARPBP/NKX3-1/TEX15/HIC1/TIMELESS/CHEK1/MUC1/FANCB/ANKLE1/BRCA1/DDX11/ATAD5/FBXO5/BLM/RAD51AP1/FOXM1/CXCL12/WDR76/DDIAS/POLQ/AUNIP/ANKRD1
GO:0051236	GO:0051236	establishment of RNA localization	186	-0.414231	-1.62988	0.00235849	0.0490018	0.0428501	5643	tags=53%, list=32%, signal=37%	MVP/CPSF2/DHX9/ATR/SSB/RBM26/DDX19A/HNRNPA1/NUP98/CHTOP/XPO7/PCID2/SEH1L/KHDRBS1/CKAP5/FIP1L1/UPF1/THOC5/SRSF9/DHX38/RAE1/RNPS1/MYO1C/GLE1/THOC1/RBM8A/CPSF3/NUP43/CPSF1/U2AF1/FLOT1/SEC13/EIF4E/POLR2D/NXT1/MRPL18/ZNF593/LRPPRC/NCBP1/U2AF1/UPF3B/CPSF4/RAN/KHSRP/NUP62/RRS1/SFPQ/IGF2BP1/SRSF3/HNRNPU/MAGOHB/NUP153/AGFG1/U2AF2/HNRNPA2B1/SLBP/NUP54/NUP58/HNRNPA3/RFTN1/NUP205/THOC7/THOC6/XPO5/NUP188/NPM1…
GO:0065004	GO:0065004	protein-DNA complex assembly	188	-0.377966	-1.49251	0.00235849	0.0490018	0.0428501	2719	tags=27%, list=15%, signal=23%	TAF4B/CENPP/CENPL/RPA1/CCNH/CENPQ/CDK7/GRWD1/HAT1/WDR18/ACD/CENPX/HMGB1/ERCC2/CENPV/CENPI/SMYD3/MIS18BP1/POLE3/CENPO/H2AFX/RPA3/PARP1/NASP/CENPN/IPO4/MIS18A/ITGB3BP/ASF1B/GMNN/CENPH/HMGB2/CENPU/CHAF1A/KNL1/DMC1/CENPK/CENPF/HJURP/CENPA/CHAF1B/CENPE/MCM2/HELLS/CDT1/CENPM/WNT10B/OIP5/CENPW/CDC45
GO:0071897	GO:0071897	DNA biosynthetic process	172	-0.454023	-1.77489	0.00235849	0.0490018	0.0428501	3694	tags=35%, list=21%, signal=28%	HSP90AA1/XRCC5/HNRNPU/CCT7/HSP90AB1/HNRNPA2B1/CCT2/PHB/CCT5/NHP2/FGF2/CCT3/CCT4/PPARG/CCT6A/RPA1/POLE4/PINX1/WRAP53/TCP1/RPA4/POLB/HNRNPD/DKC1/MAD2L2/NAT10/ACD/POLE3/PCNA/RPA3/PIF1/POLA1/LIN9/KCNK2/POLD3/LIG1/POLE/POLD1/RFC5/RFC4/POLA2/TYMS/BLM/PCLAF/RFC2/DUSP1/NEK2/DSCC1/CENPF/RFC3/CHTF18/DTL/POLE2/AURKB/POLQ/GREM1/FGFR4/TK1/ANKRD1
GO:0000070	GO:0000070	mitotic sister chromatid segregation	145	-0.66669	-2.54296	0.0023753	0.0490018	0.0428501	1671	tags=37%, list=9%, signal=33%	NCAPD3/INCENP/NCAPD2/DSN1/SMC2/KNSTRN/KIF4A/SMC4/XRCC3/NDC80/SPDL1/KIF22/KIF18A/NCAPG/FBXO5/ESPL1/RACGAP1/BUB1B/PTTG1/KIF14/PSRC1/DUSP1/KIFC1/MAD2L1/NEK2/DSCC1/CENPF/KIF2C/CENPE/HASPIN/TACC3/DLGAP5/CDCA8/CDCA5/CCNB1/NCAPH/TTK/KIF23/CDC6/ZWINT/BUB1/CDT1/TRIP13/NUF2/SPAG5/KIF18B/AURKB/SGO1/NUSAP1/PRC1/PLK1/CDC20
GO:0000077	GO:0000077	DNA damage checkpoint	142	-0.41072	-1.56231	0.0023753	0.0490018	0.0428501	2457	tags=23%, list=14%, signal=20%	PRKDC/RPA4/DOT1L/RPL26/HMGA2/ARID3A/PLAGL1/CRY1/TIPIN/PCNA/H2AFX/RFWD3/RAD9B/DONSON/CHEK1/AURKA/MUC1/EME1/BRCA1/CDC25C/E2F8/GTSE1/CDK1/BLM/BRIP1/WDR76/CLSPN/CCNB1/E2F1/DTL/PLK1/CDK2
GO:0000086	GO:0000086	G2/M transition of mitotic cell cycle	189	-0.49425	-1.95372	0.0023753	0.0490018	0.0428501	1355	tags=22%, list=8%, signal=21%	SKP2/CIT/BORA/STOX1/HAUS5/DONSON/MELK/AURKA/DBF4B/BRCA1/CDC25C/CEP152/RECQL4/FBXO5/PPME1/CDK1/KIF14/BLM/HSPA2/HAUS8/FOXM1/NEK2/PLK4/CENPF/CCNB2/HMMR/CDC7/CLSPN/TPX2/CCNB1/CEP72/CDC6/CDC25A/WNT10B/DTL/CCNA2/AURKB/PKMYT1/ORC1/PLK1/CDK2
GO:0006261	GO:0006261	DNA-dependent DNA replication	144	-0.677398	-2.57666	0.0023753	0.0490018	0.0428501	2328	tags=48%, list=13%, signal=42%	MCMBP/RTEL1/POLB/STOML2/WDR18/ACD/FANCM/CENPX/ALYREF/BAZ1A/TIPIN/PCNA/RPA3/CCNE1/POLA1/RFWD3/MMS22L/TICRR/CCNE2/POLD3/DONSON/TIMELESS/LIG1/POLE/MCM6/POLD1/DNA2/DBF4B/EME1/RFC5/WDHD1/RFC4/DDX11/GINS1/GMNN/ATAD5/FBXO5/FEN1/E2F8/GINS4/POLA2/BLM/RFC2/BRCA2/DSCC1/RNASEH2A/ORC6/GMNC/MCM3/RFC3/CDC7/TONSL/CDC6/GINS3/MCM7/MCM2/MCM4/CHTF18/CDT1/PRIM1/POLE2/POLQ/ORC1/GINS2/CDK2/MCM5/MCM10/CDC45
GO:0006323	GO:0006323	DNA packaging	142	-0.437844	-1.66549	0.0023753	0.0490018	0.0428501	2032	tags=31%, list=12%, signal=28%	NCAPH2/CENPX/HMGB1/NOC2L/CENPV/CENPI/SMYD3/MIS18BP1/POLE3/NCAPD3/NCAPD2/CENPO/H2AFX/NASP/CENPN/IPO4/SMC2/MIS18A/ITGB3BP/ASF1B/SMC4/CENPH/NCAPG/NCAPG2/HMGB2/CENPU/CHAF1A/TOP2A/KNL1/CDK1/CENPK/HJURP/CENPA/CHAF1B/CDCA5/CCNB1/NCAPH/MCM2/HELLS/CENPM/OIP5/CENPW/NUSAP1
GO:0010389	GO:0010389	regulation of G2/M transition of mitotic cell cycle	144	-0.523997	-1.99316	0.0023753	0.0490018	0.0428501	1821	tags=25%, list=10%, signal=23%	CENPJ/CDC25B/TICRR/STOX1/HAUS5/DONSON/AURKA/DBF4B/BRCA1/CDC25C/CEP152/RECQL4/FBXO5/CDK1/KIF14/BLM/HSPA2/HAUS8/NEK2/PLK4/CENPF/HMMR/CDC7/CLSPN/TPX2/CCNB1/CEP72/CDC6/CDC25A/WNT10B/DTL/AURKB/ORC1/PLK1/CDK2
GO:0032200	GO:0032200	telomere organization	145	-0.451568	-1.72242	0.0023753	0.0490018	0.0428501	3859	tags=39%, list=22%, signal=31%	RIF1/SMC6/RAD51D/HSP90AA1/XRCC5/XRCC6/XRCC1/HNRNPU/CCT7/HSP90AB1/HNRNPA2B1/CCT2/CCT5/GNL3/DCLRE1B/NHP2/HIST1H3G/CCT3/CCT4/CCT6A/RPA1/PINX1/PRKDC/WRAP53/TCP1/RPA4/RTEL1/HNRNPD/DOT1L/DKC1/TELO2/NAT10/ACD/PCNA/RPA3/PARP1/PIF1/CCNE1/POLA1/CCNE2/POLD3/POLD1/DNA2/RFC5/RFC4/XRCC3/RECQL4/FEN1/POLA2/BLM/RFC2/NEK2/RFC3/EXO1/PRIM1/AURKB
[truncated: 34 more rows]

## Sheet: GSEA_Q_to_3h
	ID	Description	setSize	enrichmentScore	NES	pvalue	p.adjust	qvalues	rank	leading_edge	core_enrichment
[truncated: 567 more rows]

[truncated: 4 more sheets: GSEA_Q_to_6h, Kegg_A_to_Q, Kegg_Q_to_3h, Kegg_Q_to_6h]
