# Supplementary material
Source: HighWire-hosted journal article supplement (doi:10.1101/rna.075309.120)
Supplement: Supplementary_Table_4_miR_loci_annotation.xlsx [file Supplementary_Table_4_miR_loci_annotation.xlsx]

## Sheet: hosted_miRNAs
hosted_miR_id	hosted_miR_name	MIRHG_name	hosted_status	hosted_times
ENSG00000278267	MIR6859-1	WASH7P	Intronic	1
ENSG00000284332	MIR1302-2	MIR1302-2HG	Exonic	1
ENSG00000273874	MIR6859-2	FO538757.1	Intronic	1
ENSG00000278791	MIR6723	AL669831.3	Intronic	1
ENSG00000278073	MIR6726	ACAP3	Intronic	1
ENSG00000283712	MIR6727	INTS11	Exonic	1
ENSG00000284372	MIR6808	DVL1	Exonic	1
ENSG00000283572	MIR4251	PRDM16	Intronic	1
ENSG00000207776	MIR551A	MEGF6	Intronic	1
ENSG00000274258	MIR6728	ENO1	Intronic	1
ENSG00000284357	MIR34A	MIR34AHG	Exonic	1
ENSG00000265521	MIR5697	NMNAT1	Intronic	1
ENSG00000264881	MIR1273D	KIF1B	Intronic	1
ENSG00000276869	MIR6729	MIIP	Intronic	1
ENSG00000263676	MIR4632	TNFRSF1B	Intronic	1
ENSG00000276830	MIR6730	DHRS3	Intronic	1
ENSG00000266634	MIR3972	PADI3	Intronic	1
ENSG00000265606	MIR4695	AL080251.1|ALDH4A1	Intronic|Intronic	2
ENSG00000221662	MIR1290	AL080251.1|ALDH4A1	Intronic|Intronic	2
ENSG00000284005	MIR6084	PINK1	Exonic	1
ENSG00000221808	MIR1256	EIF4G3	Intronic	1
ENSG00000265422	MIR4684	EPHB2	Intronic	1
ENSG00000263793	MIR3115	KDM1A	Intronic	1
ENSG00000266802	MIR4419A	AL031428.1	Intronic	1
ENSG00000278034	MIR6731	RUNX3	Intronic	1
ENSG00000283938	MIR3917	STMN1	SO	1
ENSG00000238705	MIR1976	RPS6KA1	Intronic	1
ENSG00000264773	MIR4420	LAPTM5	Intronic	1
ENSG00000266580	MIR4254	ADGRB2	Intronic	1
ENSG00000266203	MIR5585	TMEM39B	Intronic	1
ENSG00000284154	MIR3605	PHC2	SO	1
ENSG00000283724	MIR6732	ZC3H12A	Exonic	1
ENSG00000263675	MIR5581	MEAF6	Intronic	1
ENSG00000265596	MIR3659	AL139158.2	Intronic	1
ENSG00000198974	MIR30E	NFYC	Intronic	1
ENSG00000207962	MIR30C1	NFYC	Intronic	1
ENSG00000284410	MIR6733	EBNA1BP2	Exonic	1
ENSG00000283836	MIR6734	ELOVL1	Exonic	1
ENSG00000274975	MIR6735	SZT2	Intronic	1
ENSG00000283477	MIR6079	AL451062.3|ST3GAL3	Intronic|Exonic	2
ENSG00000263381	MIR5584	RNF220	Intronic	1
ENSG00000283899	MIR761	NRDC	SO	1
ENSG00000264834	MIR1273F	SCP2	Intronic	1
ENSG00000266188	MIR5095	SCP2	Intronic	1
ENSG00000265815	MIR1273G	SCP2	Intronic	1
ENSG00000283749	MIR4781	TCEANC2	SO	1
ENSG00000265822	MIR4422	MIR4422HG	Intronic	1
ENSG00000263908	MIR3116-1	PATJ	Intronic	1
ENSG00000264470	MIR4794	CACHD1	Intronic	1
ENSG00000264720	MIR3117	SGIP1	Intronic	1
ENSG00000221203	MIR1262	WLS	Intronic	1
ENSG00000207721	MIR186	ZRANB2	Intronic	1
ENSG00000276081	MIR7156	ST6GALNAC5	Intronic	1
ENSG00000278281	MIR7856	ODF2L	Intronic	1
ENSG00000263526	MIR378G	SLC44A3-AS1	Intronic	1
ENSG00000284247	MIR2682	MIR137HG	Exonic	1
ENSG00000284202	MIR137	MIR137HG	Exonic	1
ENSG00000207750	MIR553	RTCA	Intronic	1
ENSG00000284443	MIR197	GNAI3	Exonic	1
ENSG00000264419	MIR548AC	CD58	Intronic	1
ENSG00000215930	MIR942	TTF2	Intronic	1
ENSG00000278549	MIR6736	PIAS3	Intronic	1
ENSG00000283676	MIR5087	LINC01138	Intronic	1
ENSG00000283933	MIR6878	TARS2	Exonic	1
ENSG00000264553	MIR4257	ADAMTSL4	Intronic	1
ENSG00000207606	MIR554	TUFT1|AL365436.2	Intronic|Intronic	2
ENSG00000276584	MIR6737	SLC39A1|AL358472.7	Intronic|Intronic	2
ENSG00000263987	MIR5698	NUP210L	Intronic	1
ENSG00000215938	MIR190B	TPM3	Intronic	1
ENSG00000264349	MIR4258	CKS1B	Intronic	1
ENSG00000284586	MIR92B	AC234582.1	Exonic	1
ENSG00000283701	MIR555	ASH1L	SO	1
ENSG00000277817	MIR6738	ARHGEF2	Intronic	1
ENSG00000207933	MIR9-1	C1orf61	Intronic	1
ENSG00000211581	MIR765	ARHGEF11	Intronic	1
ENSG00000266458	MIR4259	CFAP45	Intronic	1
ENSG00000284035	MIR5187	TOMM40L	SO	1
ENSG00000266144	MIR4654	NOS1AP	Intronic	1
ENSG00000207729	MIR556	NOS1AP	Intronic	1
ENSG00000283936	MIR3658	UCK2	Exonic	1
ENSG00000215952	MIR921	FAM78B|AL596087.2	Intronic|Intronic	2
ENSG00000221545	MIR1255B2	DCAF6	Intronic	1
ENSG00000207974	MIR557	AL022100.1	Intronic	1
ENSG00000263390	MIR3119-2	METTL11B	Intronic	1
ENSG00000283598	MIR1295B	FMO3	Intronic	1
ENSG00000283844	MIR214	DNM3OS	Exonic	1
ENSG00000283152	MIR3120	DNM3	Intronic	1
ENSG00000208024	MIR199A2	DNM3OS	SO	1
ENSG00000202609	MIR488	ASTN1	Intronic	1
ENSG00000265435	MIR3121	ACBD6	Intronic	1
ENSG00000283795	MIR4426	AL136454.1	Exonic	1
ENSG00000221680	MIR1278	CDC73	Intronic	1
ENSG00000265986	MIR4735	KCNT2	Intronic	1
ENSG00000207975	MIR181B1	MIR181A1HG	Intronic	1
ENSG00000207759	MIR181A1	MIR181A1HG	Intronic	1
ENSG00000264802	MIR5191	NAV1	Intronic	1
ENSG00000221028	MIR1231	NAV1	Intronic	1
ENSG00000277681	MIR6739	IPO9	Intronic	1
ENSG00000275207	MIR6740	RNPEP	Intronic	1
ENSG00000199059	MIR135B	LEMD1	Intronic	1
ENSG00000278465	MIR6769B	IKBKE	Intronic	1
ENSG00000284214	MIR29C	MIR29B2CHG	Exonic	1
ENSG00000284203	MIR29B2	MIR29B2CHG	Exonic	1
ENSG00000284485	MIR205	MIR205HG	SO	1
ENSG00000283876	MIR4260	LAMB3	SO	1
ENSG00000264358	MIR3122	DTL	Intronic	1
ENSG00000281696	MIR664A	RAB3GAP2	Intronic	1
ENSG00000221406	MIR320B2	NVL	Intronic	1
ENSG00000266618	MIR4742	WDR26	Intronic	1
ENSG00000284519	MIR6741	AL117348.2|PYCR2	Intronic|Exonic	2
ENSG00000264483	MIR5008	WNT9A	Intronic	1
ENSG00000284163	MIR3620	ARF1	Exonic	1
ENSG00000284311	MIR6742	TRIM11	Exonic	1
ENSG00000283799	MIR1182	FAM89A	Exonic	1
ENSG00000265744	MIR4427	KCNK1	Intronic	1
ENSG00000264377	MIR4671	SLC35F3	Intronic	1
ENSG00000263439	MIR4753	ARID4B	Intronic	1
ENSG00000222831	MIR1537	LYST	Intronic	1
ENSG00000266262	MIR4428	RYR2	Intronic	1
ENSG00000265201	MIR4677	SDCCAG8	Intronic	1
ENSG00000283881	MIR3916	AL390728.4	Exonic	1
ENSG00000276733	MIR7158	LINC01105	Intronic	1
ENSG00000265056	MIR548S	LPIN1	Intronic	1
ENSG00000264089	MIR3681	MIR3681HG	Intronic	1
ENSG00000264370	MIR3125	TRIB2	Intronic	1
ENSG00000221445	MIR1301	DNMT3A	Intronic	1
ENSG00000265321	MIR4263	BABAM2	Intronic	1
ENSG00000207653	MIR558	BIRC6	Intronic	1
ENSG00000265057	MIR4765	TTC27	Intronic	1
ENSG00000207923	MIR559	EPCAM	Intronic	1
ENSG00000212036	MIR548BA	AC009975.1	Intronic	1
ENSG00000216191	MIR8485	NRXN1	Intronic	1
ENSG00000265452	MIR3682	GPR75-ASB3	Intronic	1
ENSG00000207548	MIR217	MIR217HG	Intronic	1
ENSG00000207798	MIR216A	MIR217HG	Intronic	1
ENSG00000211520	MIR216B	MIR217HG	Intronic	1
ENSG00000266078	MIR4432	MIR4432HG	Intronic	1
ENSG00000266097	MIR5192	B3GNT2	Intronic	1
ENSG00000264297	MIR4433B	AC114752.2	Intronic	1
ENSG00000283204	MIR4434	AFTPH	Intronic	1
ENSG00000266649	MIR3126	ANTXR1	Intronic	1
ENSG00000265420	MIR4779	IMMT	Intronic	1
ENSG00000264793	MIR4771-1	AC083899.1	Intronic	1
ENSG00000265507	MIR4435-1	CYTOR|AC133644.3	Exonic|Intronic	2
ENSG00000264157	MIR3127	CNNM4	Intronic	1
ENSG00000264764	MIR4772	IL18RAP	Intronic	1
ENSG00000264979	MIR4436B1	MALL	Intronic	1
ENSG00000263881	MIR4436B2	AC140479.5|AC140479.6	Intronic|Intronic	2
ENSG00000266139	MIR4435-2	MIR4435-2HG	Intronic	1
ENSG00000266063	MIR4771-2	ANAPC1	Intronic	1
ENSG00000265429	MIR4782	SLC35F5	Intronic	1
ENSG00000284149	MIR4784	MZT2A	Exonic	1
ENSG00000221288	MIR663B	ANKRD30BL	Intronic	1
ENSG00000263813	MIR3679	MGAT5	Intronic	1
ENSG00000263783	MIR5590	ACMSD	Intronic	1
ENSG00000207654	MIR128-1	R3HDM1	Intronic	1
ENSG00000283506	MIR7157	LRP1B	Intronic	1
ENSG00000264684	MIR4773-1	TNFAIP6	Intronic	1
ENSG00000275141	MIR6888	TANC1	Intronic	1
ENSG00000283734	MIR4785	RBMS1	Exonic	1
ENSG00000265694	MIR4774	CERS6	Intronic	1
ENSG00000215973	MIR933	ATF2	Intronic	1
ENSG00000207744	MIR10B	HOXD3	Intronic	1
ENSG00000283880	MIR7704	HOXD1	Exonic	1
ENSG00000284252	MIR4444-1	HNRNPA3	Exonic	1
ENSG00000265396	MIR3128	NFE2L2	Intronic	1
ENSG00000278418	MIR6512	NFE2L2|AC019080.1	Intronic|Intronic	2
ENSG00000221240	MIR1258	ZNF385B	Intronic	1
ENSG00000207951	MIR561	GULP1	Intronic	1
ENSG00000221502	MIR1245A	COL3A1	Intronic	1
ENSG00000284180	MIR3606	COL3A1	SO	1
ENSG00000264725	MIR3129	COL5A2	Intronic	1
ENSG00000263468	MIR3130-2	FASTKD2	Intronic	1
ENSG00000253008	MIR2355	KLF7	Intronic	1
ENSG00000221628	MIR1302-4	AC009226.1	Intronic	1
ENSG00000284079	MIR4775	CCNYL1	Exonic	1
ENSG00000221782	MIR548F2	ERBB4	Intronic	1
ENSG00000283637	MIR4776-2	AC093865.1	Intronic	1
ENSG00000265734	MIR4438	SPAG16	Intronic	1
ENSG00000275458	MIR6809	TNS1	Intronic	1
ENSG00000284173	MIR6513	TMBIM1	Exonic	1
ENSG00000278524	MIR6810	PNKD	Intronic	1
ENSG00000199121	MIR26B	CTDSP1	Intronic	1
ENSG00000264755	MIR3131	IHH	Intronic	1
ENSG00000207647	MIR153-1	PTPRN	Intronic	1
ENSG00000263828	MIR4439	DOCK10	Intronic	1
ENSG00000263641	MIR4777	ARMC9	Intronic	1
ENSG00000284378	MIR1244-1	PTMA	Exonic	1
ENSG00000207626	MIR562	DIS3L2	Intronic	1
ENSG00000284407	MIR5001	TIGD1	Exonic	1
ENSG00000277842	MIR6811	MLPH	Intronic	1
ENSG00000266109	MIR4440	HDAC4	Intronic	1
ENSG00000264810	MIR4441	HDAC4	Intronic	1
ENSG00000264292	MIR2467	HDAC4	Intronic	1
ENSG00000264279	MIR4786	NDUFA10	Intronic	1
ENSG00000207611	MIR149	GPC1	Intronic	1
ENSG00000263752	MIR3133	FARP2	Intronic	1
ENSG00000216135	MIR885	ATP2B2	Intronic	1
ENSG00000263573	MIR4270	COLQ	Intronic	1
ENSG00000264354	MIR3134	ANKRD28	Intronic	1
ENSG00000283885	MIR3714	PLCL2	Exonic	1
ENSG00000266745	MIR3135A	KAT2B	Intronic	1
ENSG00000207625	MIR128-2	ARPP21	Intronic	1
ENSG00000199075	MIR26A1	CTDSPL	Intronic	1
ENSG00000284158	MIR6822	TTC21A	SO	1
ENSG00000284498	MIR564	KIF15|TMEM42	Intronic|Exonic	2
ENSG00000221585	MIR1226	DHX30	Intronic	1
ENSG00000252466	MIR2115	SPINK8	Intronic	1
ENSG00000278799	MIR6823	PFKFB4	Intronic	1
ENSG00000284251	MIR711	COL7A1	SO	1
ENSG00000284364	MIR6824	SLC26A6	Exonic	1
ENSG00000284575	MIR4793	CELSR3	SO	1
ENSG00000199032	MIR425	DALRD3	Intronic	1
ENSG00000207605	MIR191	DALRD3	Intronic	1
ENSG00000284488	MIR6890	QARS	Exonic	1
ENSG00000283726	MIR5193	UBA7	Exonic	1
ENSG00000207922	MIR566	SEMA3F	Intronic	1
ENSG00000275334	MIR5787	GNAI2	Intronic	1
ENSG00000283848	MIR6872	SEMA3B	Exonic	1
ENSG00000199150	MIRLET7G	WDR82	Intronic	1
ENSG00000207926	MIR135A1	GLYCTK-AS1	Intronic	1
ENSG00000275789	MIR8064	TMEM110-MUSTN1|STIMATE	Intronic|Intronic	2
ENSG00000264013	MIR3938	ERC2	Intronic	1
ENSG00000281426	MIR548BB	FHIT	Intronic	1
ENSG00000265355	MIR3136	TMF1	Intronic	1
ENSG00000221264	MIR1284	FOXP1|AC097634.4	Intronic|Intronic	2
ENSG00000283894	MIR1324	CLUHP10	SO	1
ENSG00000264084	MIR5688	CADM2	Intronic	1
ENSG00000264897	MIR3921	FILIP1L	Intronic	1
ENSG00000207940	MIR567	C3orf52	Intronic	1
ENSG00000275670	MIR8076	CFAP44|AC112128.1	Intronic|Intronic	2
ENSG00000265253	MIR4446	SIDT1	Intronic	1
ENSG00000284134	MIR568	ZBTB20|AC093010.3	Exonic|Exonic	2
ENSG00000264623	MIR4796	ZBTB20	Intronic	1
ENSG00000265433	MIR4447	LSAMP	Intronic	1
ENSG00000284121	MIR198	FSTL1	Exonic	1
ENSG00000264477	MIR5682	STXBP5L	Intronic	1
ENSG00000284421	MIR7110	PDIA5	Exonic	1
ENSG00000266383	MIR5002	KALRN	Intronic	1
ENSG00000276656	MIR6083	KALRN	Intronic	1
ENSG00000265981	MIR544B	UMPS	Intronic	1
ENSG00000264986	MIR5092	SLC12A8	Intronic	1
ENSG00000275067	MIR6825	TPRA1	Intronic	1
ENSG00000276083	MIR7976	TPRA1	Intronic	1
ENSG00000278658	MIR6826	COPG1	Intronic	1
ENSG00000265859	MIR5704	CPNE4	Intronic	1
ENSG00000277723	MIR6827	AMOTL2	Intronic	1
ENSG00000284561	MIR4788	HMGB3P13	Exonic	1
ENSG00000263634	MIR3919	IQCJ-SCHIP1	Intronic	1
ENSG00000207779	MIR15B	SMC4	Intronic	1
ENSG00000198987	MIR16-2	SMC4	Intronic	1
ENSG00000207717	MIR551B	EGFEM1P	Intronic	1
ENSG00000283474	MIR6828	CLDN11|AC026316.5	Intronic|Intronic	2
ENSG00000207963	MIR569	TNIK	Intronic	1
ENSG00000264974	MIR4789	NAALADL2	Intronic	1
ENSG00000263932	MIR4448	RPSAP31	Intronic	1
ENSG00000221120	MIR1224	VWA5B2	Intronic	1
ENSG00000264614	MIR5588	EHHADH	Intronic	1
ENSG00000265470	MIR548AQ	IGF2BP2	Intronic	1
ENSG00000283958	MIR1248	EIF4A2	Exonic	1
ENSG00000207651	MIR28	LPP	Intronic	1
ENSG00000216058	MIR944	TP63	Intronic	1
ENSG00000265333	MIR3137	XXYLT1	Intronic	1
ENSG00000207650	MIR570	MUC20-OT1	Intronic	1
ENSG00000276489	MIR6829	TNK2	Intronic	1
ENSG00000265850	MIR4797	DLG1	Intronic	1
ENSG00000284146	MIR922	RUBCN	Exonic	1
ENSG00000207642	MIR571	ZNF141	Intronic	1
ENSG00000284587	MIR943	NELFA	Exonic	1
ENSG00000284276	MIR4800	MXD4	Exonic	1
ENSG00000263631	MIR378D1	C4orf50	Intronic	1
ENSG00000264658	MIR4798	SORCS2	Intronic	1
ENSG00000266690	MIR4274	SORCS2	Intronic	1
ENSG00000207807	MIR95	ABLIM2	Intronic	1
ENSG00000264931	MIR3138	WDR1	Intronic	1
ENSG00000207732	MIR218-1	SLIT2	Intronic	1
ENSG00000283281	MIR7978	KCNIP4	Intronic	1
ENSG00000207697	MIR573	DHX15	Intronic	1
ENSG00000207944	MIR574	FAM114A1	Intronic	1
ENSG00000264621	MIR5591	KLB	Intronic	1
ENSG00000263642	MIR4802	RBM47	Intronic	1
ENSG00000264585	MIR4449	DANCR	Intronic	1
ENSG00000263445	MIR4450	SHROOM3	Intronic	1
ENSG00000283682	MIR548AH	SHROOM3	Intronic	1
ENSG00000266270	MIR5096	BMP2K	Intronic	1
ENSG00000207746	MIR575	SCD5	Intronic	1
ENSG00000266421	MIR4451	ARHGAP24	Intronic	1
ENSG00000266515	MIR4452	MAPK10	Intronic	1
ENSG00000265213	MIR3684	METAP1	Intronic	1
ENSG00000273882	MIR8066	PPP3CA	Intronic	1
ENSG00000221265	MIR1255A	PPP3CA	Intronic	1
ENSG00000207988	MIR576	SEC24B	Intronic	1
ENSG00000199169	MIR367	AC106864.1	Intronic	1
ENSG00000199145	MIR302D	AC106864.1	Intronic	1
ENSG00000207927	MIR302A	AC106864.1	Intronic	1
ENSG00000199102	MIR302C	AC106864.1	Intronic	1
ENSG00000284463	MIR302B	AC106864.1	SO	1
ENSG00000283193	MIR1243	ANK2	Intronic	1
ENSG00000275810	MIR8082	ANK2	Intronic	1
ENSG00000207931	MIR577	UGT8	Intronic	1
ENSG00000284253	MIR1973	MTRNR2L13	Exonic	1
ENSG00000265623	MIR3139	GAB1	Intronic	1
ENSG00000264274	MIR4799	ARHGAP10	Intronic	1
ENSG00000264678	MIR3140	FBXW7	Intronic	1
ENSG00000283792	MIR4453	MIR4453HG	Exonic	1
ENSG00000283379	MIR3688-2	RAPGEF2	Intronic	1
ENSG00000207559	MIR578	CPE	Intronic	1
ENSG00000221296	MIR548T	GALNT7	Intronic	1
ENSG00000221227	MIR1305	TENM3|AC108142.1	Intronic|Intronic	2
ENSG00000266698	MIR3945	MIR3945HG	Intronic	1
ENSG00000263834	MIR4635	SLC12A7	Intronic	1
ENSG00000273742	MIR6075	LPCAT1	Intronic	1
ENSG00000284000	MIR4458	MIR4458HG	Exonic	1
ENSG00000266415	MIR4636	SEMA5A	Intronic	1
ENSG00000264792	MIR4637	ANKH	Intronic	1
ENSG00000216077	MIR887	FBXL7	Intronic	1
ENSG00000207956	MIR579	ZFR	Intronic	1
ENSG00000207756	MIR580	LMBRD2	Intronic	1
ENSG00000265304	MIR3650	LIFR	Intronic	1
ENSG00000207627	MIR581	ARL15	Intronic	1
ENSG00000265421	MIR4459	ARL15	Intronic	1
ENSG00000198983	MIR449A	CDC20B	Intronic	1
ENSG00000207728	MIR449B	CDC20B	Intronic	1
ENSG00000251856	MIR449C	CDC20B	Intronic	1
ENSG00000265135	MIR5687	PLPP1	Intronic	1
ENSG00000202601	MIR582	PDE4D	Intronic	1
ENSG00000264099	MIR4803	MAP1B	Intronic	1
ENSG00000263593	MIR4804	TNPO1	Intronic	1
ENSG00000284078	AC108110.1	COX7C	Exonic	1
ENSG00000284447	MIR9-2	LINC00461	Exonic	1
ENSG00000284336	MIR2277	FAM172A	Exonic	1
ENSG00000207578	MIR583	AC104123.1|MIR583HG	Intronic|Intronic	2
ENSG00000221263	MIR548P	ST8SIA4	Intronic	1
ENSG00000221436	MIR548F3	TMEM232	Intronic	1
ENSG00000264536	MIR5706	DMXL1	Intronic	1
ENSG00000264563	MIR4633	ISOC1	Intronic	1
ENSG00000283678	MIR6830	P4HA2	Intronic	1
ENSG00000263597	MIR3936	MIR3936HG	Intronic	1
ENSG00000221287	MIR1289-2	FSTL4	Intronic	1
ENSG00000263963	MIR4461	PCBD2	Intronic	1
ENSG00000216009	MIR874	KLHL3	Intronic	1
ENSG00000283717	MIR6831	APBB3|AC116353.4	Exonic|Intronic	2
ENSG00000284325	MIR3655	IK	SO	1
ENSG00000266478	MIR5197	AC008696.2	Intronic	1
ENSG00000207714	MIR584	SH3TC2	Intronic	1
ENSG00000284182	MIR143	CARMN	Exonic	1
ENSG00000276365	MIR145	CARMN	Intronic	1
ENSG00000199047	MIR378A	PPARGC1B	Intronic	1
ENSG00000276622	MIR6499	FAT2	Intronic	1
ENSG00000221430	MIR1294	GALNT10	Intronic	1
ENSG00000265237	MIR3142	MIR3142HG	Intronic	1
ENSG00000283733	MIR146A	MIR3142HG	Exonic	1
ENSG00000199035	MIR103A1	PANK3	Intronic	1
ENSG00000207739	MIR218-2	SLIT3	Intronic	1
ENSG00000207619	MIR585	SLIT3	Intronic	1
ENSG00000263831	MIR378E	DOCK2	Intronic	1
ENSG00000265160	MIR5003	NEURL1B	Intronic	1
ENSG00000266890	MIR4634	AC113346.2	Intronic	1
ENSG00000221464	MIR1271	ARL10	Intronic	1
ENSG00000266329	MIR4281	SNCB	Intronic	1
ENSG00000221394	MIR1229	MGAT4B	Intronic	1
ENSG00000198995	MIR340	RNF130	Intronic	1
ENSG00000265083	MIR3691	LYRM4	Intronic	1
ENSG00000263572	MIR7853	F13A1	Intronic	1
ENSG00000263705	MIR5689	MIR5689HG	Intronic	1
ENSG00000263712	MIR4639	MYLIP	Intronic	1
ENSG00000207775	MIR548A1	MIR548A1HG	Intronic	1
ENSG00000216101	MIR877	ABCF1	Intronic	1
ENSG00000284370	MIR4640	DDR1	Exonic	1
ENSG00000277402	MIR6891	HLA-B	Intronic	1
ENSG00000274494	MIR6832	PRRC2A	Intronic	1
ENSG00000266776	MIR4646	ABHD16A|AL662899.1	Intronic|Intronic	2
ENSG00000284446	MIR1236	NELFE	Exonic	1
ENSG00000284469	MIR6721	AGPAT1	SO	1
ENSG00000277264	MIR6833	RNF5	Intronic	1
ENSG00000284517	MIR6873	WDR46	SO	1
ENSG00000284064	MIR6834	PFDN6	Exonic	1
ENSG00000284256	MIR5004	SYNGAP1	SO	1
ENSG00000276824	MIR7159	AL138889.1	Intronic	1
ENSG00000276404	MIR6835	HMGA1	Intronic	1
ENSG00000276712	MIR7111	RPL10A	Intronic	1
ENSG00000265527	MIR5690	FKBP5	Intronic	1
ENSG00000266494	MIR4641	FOXP4	Intronic	1
ENSG00000276770	MIR6780B	ABCC10	Intronic	1
ENSG00000284427	MIR4647	SLC35B2	Exonic	1
ENSG00000266619	MIR4642	CDC5L	Intronic	1
ENSG00000207769	MIR586	SUPT3H	Intronic	1
ENSG00000212017	MIR548U	PRIM2	Intronic	1
ENSG00000199094	MIR30C2	AL136164.2|LINC00472	Intronic|Intronic	2
ENSG00000207827	MIR30A	AL136164.2|LINC00472	Intronic|Intronic	2
ENSG00000238367	MIR2113	AL589740.1	Intronic	1
ENSG00000207982	MIR548B	FAM184A	Intronic	1
ENSG00000283409	MIR3662	HBS1L	Intronic	1
ENSG00000266555	MIR3145	NHSL1	Intronic	1
ENSG00000264814	MIR1273C	TIAM2	Intronic	1
ENSG00000266617	MIR3692	ZDHHC14	Intronic	1
ENSG00000278571	MIR7161	TMEM181	Intronic	1
ENSG00000222958	MIR1913	RPS6KA2	Intronic	1
ENSG00000265828	MIR3939	Z94721.1|Z94721.3	Intronic|Intronic	2
ENSG00000266245	MIR4644	FAM120B	Intronic	1
ENSG00000199023	MIR339	C7orf50	Intronic	1
ENSG00000265089	MIR4655	MAD1L1	Intronic	1
ENSG00000284047	MIR6836	SNX8	Exonic	1
ENSG00000264357	MIR4648	LFNG	Intronic	1
ENSG00000207973	MIR589	FBXL18	Intronic	1
ENSG00000283419	MIR6874	RNF216	Intronic	1
ENSG00000265932	MIR3146	TWISTNB	Intronic	1
ENSG00000221783	MIR1183	SP4	Intronic	1
ENSG00000283745	MIR196B	HOXA9|AC004080.3	Exonic|Intronic	2
ENSG00000212024	MIR550A3	ZNRF2P2	Intronic	1
ENSG00000207771	MIR550A1	ZNRF2	Intronic	1
ENSG00000283461	MIR550B2	DPY19L1P1	Intronic	1
ENSG00000207573	MIR550A2	ZNRF2P1	Intronic	1
ENSG00000221669	MIR548N	DPY19L1	Intronic	1
ENSG00000221325	MIR1200	ELMO1	Intronic	1
ENSG00000264069	MIR3943	HECW1|HECW1-IT1	Intronic|Intronic	2
ENSG00000284067	MIR6837	DBNL	Exonic	1
ENSG00000283969	MIR6838	POLM	SO	1
ENSG00000284412	MIR4649	AEBP1	Exonic	1
ENSG00000284261	MIR4657	PURB	Exonic	1
ENSG00000266168	MIR3147	AC237221.1	Intronic	1
ENSG00000275667	MIR6839	ZNF107	SO	1
ENSG00000283278	MIR3914-2	GALNT17	Intronic	1
ENSG00000207741	MIR590	EIF4H	Intronic	1
ENSG00000284334	MIR4651	POR	Exonic	1
ENSG00000221520	MIR1285-1	AC000120.3|KRIT1|AC000120.1	Intronic|Intronic|Intronic	3
ENSG00000208014	MIR653	CALCR	Intronic	1
ENSG00000207656	MIR489	CALCR	Intronic	1
ENSG00000265423	MIR4652	GNGT1	Intronic	1
ENSG00000208025	MIR591	SLC25A13	Intronic	1
ENSG00000266668	MIR5692C2	AC079781.5	Intronic	1
ENSG00000266019	MIR3609	TRRAP	Intronic	1
ENSG00000207547	MIR25	MCM7	Intronic	1
ENSG00000207757	MIR93	MCM7	Intronic	1
ENSG00000208036	MIR106B	MCM7	Intronic	1
ENSG00000284518	MIR4658	C7orf43	SO	1
ENSG00000284012	MIR6840	STAG3L5P-PVRIG2P-PILRB|PILRB	Intronic|Exonic	2
ENSG00000283821	MIR6875	TRIP6	Exonic	1
ENSG00000264425	MIR4653	AP1S1	Intronic	1
ENSG00000264675	MIR4285	SH2B2	Intronic	1
ENSG00000284176	MIR5090	LRWD1	Exonic	1
ENSG00000284596	MIR4467	LRWD1	Exonic	1
ENSG00000272230	MIR3666	FOXP2	Intronic	1
ENSG00000283923	MIR6132	ST7|ST7-OT4	Exonic|Intronic	2
ENSG00000207692	MIR592	GRM8	Intronic	1
ENSG00000207588	MIR593	SND1	Intronic	1
ENSG00000199043	MIR335	MEST	Intronic	1
ENSG00000284032	MIR29A	AC016831.6	Intronic	1
ENSG00000283797	MIR29B1	AC016831.6|LINC-PINT	Intronic|Exonic	2
ENSG00000284135	MIR3654	CHCHD3|AC008038.1	Intronic|Exonic	2
ENSG00000276137	MIR6133	EXOC4	Intronic	1
ENSG00000277138	MIR6509	WDR91	Intronic	1
ENSG00000207597	MIR490	CHRM2	Intronic	1
ENSG00000284028	MIR4468	RCC2P3	Exonic	1
ENSG00000278449	MIR6892	ZYX	Intronic	1
ENSG00000284191	MIR671	CHPF2	Exonic	1
ENSG00000265810	MIR3907	CRYGN	Intronic	1
ENSG00000207960	MIR153-2	PTPRN2	Intronic	1
ENSG00000207637	MIR595	PTPRN2	Intronic	1
ENSG00000265658	MIR3690	CSF2RA	Intronic	1
ENSG00000207628	MIR651	AC097626.1	Intronic	1
ENSG00000263652	MIR548AX	ARHGAP6	Intronic	1
ENSG00000283493	MIR6086	EGFL6	Intronic	1
ENSG00000265144	MIR548AM	CTPS2	Intronic	1
ENSG00000265465	MIR4768	NHS	Intronic	1
ENSG00000264566	MIR23C	MAP7D2	Intronic	1
ENSG00000264090	MIR4666B	IL1RAPL1	Intronic	1
ENSG00000263600	MIR3915	DMD	Intronic	1
ENSG00000221348	MIR548F5	DMD	Intronic	1
ENSG00000207870	MIR221	MIR222HG	Intronic	1
ENSG00000207725	MIR222	MIR222HG	Intronic	1
ENSG00000207758	MIR532	CLCN5	Intronic	1
ENSG00000207768	MIR188	CLCN5	Intronic	1
ENSG00000207785	MIR500A	CLCN5	Intronic	1
ENSG00000208015	MIR362	CLCN5	Intronic	1
ENSG00000211538	MIR501	CLCN5	Intronic	1
ENSG00000239057	MIR500B	CLCN5	Intronic	1
ENSG00000207970	MIR660	CLCN5	Intronic	1
ENSG00000272080	MIR502	CLCN5	Intronic	1
ENSG00000276575	MIR6895	KDM5C	Intronic	1
ENSG00000277474	MIR6894	KDM5C	Intronic	1
ENSG00000278204	MIR6857	SMC1A	Intronic	1
ENSG00000271886	MIR98	HUWE1	Intronic	1
ENSG00000208012	MIRLET7F2	HUWE1	Intronic	1
ENSG00000222532	MIR1468	ARHGEF9	Intronic	1
ENSG00000284567	MIR223	AL034397.3	Exonic	1
ENSG00000211991	MIR676	EDA	Intronic	1
ENSG00000202566	MIR421	FTX	Intronic	1
ENSG00000212027	MIR374B	FTX	Intronic	1
ENSG00000207820	MIR545	FTX	Intronic	1
ENSG00000199168	MIR374A	FTX	Intronic	1
ENSG00000283242	MIR384	MIR325HG	Intronic	1
ENSG00000207995	MIR325	MIR325HG	Intronic	1
ENSG00000199051	MIR361	CHM	Intronic	1
ENSG00000263515	MIR548AN	CXorf57	Intronic	1
ENSG00000208013	MIR652	TMEM164	Intronic	1
ENSG00000265584	MIR3978	TMEM164	Intronic	1
ENSG00000283775	MIR4329	AMOT	Exonic	1
ENSG00000212100	MIR764	HTR2C	Intronic	1
ENSG00000222321	MIR1912	HTR2C	Intronic	1
ENSG00000276158	MIR1264	HTR2C	Intronic	1
ENSG00000221710	MIR1298	HTR2C	Intronic	1
ENSG00000222715	MIR1911	HTR2C	Intronic	1
ENSG00000199001	MIR448	HTR2C	Intronic	1
ENSG00000221463	MIR1277	WDR44	Intronic	1
ENSG00000211578	MIR766	2019-09-06	Intronic	1
ENSG00000284499	MIR363	AC002407.1	Exonic	1
ENSG00000284538	MIR92A2	AC002407.1	Exonic	1
ENSG00000284107	MIR19B2	AC002407.1	Exonic	1
ENSG00000284043	MIR20B	AC002407.1	Exonic	1
ENSG00000283931	MIR18B	AC002407.1	Exonic	1
ENSG00000284157	MIR106A	AC002407.1	Exonic	1
ENSG00000208005	MIR503	MIR503HG	Intronic	1
ENSG00000216060	MIR934	VGLL1	Intronic	1
ENSG00000207800	MIR504	FGF13	Intronic	1
ENSG00000207633	MIR505	ATP11C	Intronic	1
ENSG00000284363	MIR224	GABRE	Exonic	1
ENSG00000283751	MIR452	GABRE	Exonic	1
ENSG00000207957	MIR105-1	GABRA3	Intronic	1
ENSG00000211583	MIR767	GABRA3	Intronic	1
ENSG00000207818	MIR105-2	GABRA3	Intronic	1
ENSG00000265176	MIR3202-1	TMEM187	Intronic	1
ENSG00000276350	MIR6858	FAM50A	Intronic	1
ENSG00000284450	MIR664B	DKC1|SNORA36A	Exonic|Exonic	2
ENSG00000221533	MIR1184-1	F8	Intronic	1
ENSG00000283858	MIR3674	CLN8|KBTBD11-OT1	Exonic|Intronic	2
ENSG00000207826	MIR596	KBTBD11-OT1	Intronic	1
ENSG00000273593	MIR7160	MYOM2	Intronic	1
ENSG00000276580	MIR8055	MCPH1-AS1	Intronic	1
ENSG00000266038	MIR4659A	AGPAT5	Intronic	1
ENSG00000263407	MIR4660	ERI1	Intronic	1
ENSG00000207701	MIR597	TNKS	Intronic	1
ENSG00000284321	MIR124-1	LINC00599	Exonic	1
ENSG00000283210	MIR1322	PINX1|PINX1	Intronic|Intronic	2
ENSG00000207600	MIR598	XKR6	Intronic	1
ENSG00000266206	MIR3926-1	LONRF1	Intronic	1
ENSG00000199127	MIR383	SGCZ	Intronic	1
ENSG00000265520	MIR548V	MTUS1	Intronic	1
ENSG00000283327	MIR6841	NEFL	Intronic	1
ENSG00000274988	MIR6876	DOCK5	Intronic	1
ENSG00000273836	MIR6842	PTK2B	Intronic	1
ENSG00000284280	MIR6843	CLU	Exonic	1
ENSG00000284351	MIR3622A	AC013643.3	Exonic	1
ENSG00000265847	MIR4287	SCARA5	Intronic	1
ENSG00000263372	MIR548AO	SFRP1	Intronic	1
ENSG00000274705	MIR486-1	ANK1	Intronic	1
ENSG00000284062	MIR4469	RNF170	SO	1
ENSG00000207816	MIR124-2	MIR124-2HG	Intronic	1
ENSG00000283188	MIR2052	MIR2052HG	Intronic	1
ENSG00000266194	MIR4661	LRRC69	Intronic	1
ENSG00000284288	MIR378D2	AC084346.2	Exonic	1
ENSG00000284147	MIR3150B	MIR3150BHG|AC068189.1	SO|Intronic	2
ENSG00000283522	MIR3150A	NDUFAF6	Intronic	1
ENSG00000221753	MIR1273A	RGS22	Intronic	1
ENSG00000284570	MIR7705	PABPC1	Exonic	1
ENSG00000265657	MIR3151	BAALC	Intronic	1
ENSG00000283956	MIR3610	RAD21	Exonic	1
ENSG00000283172	MIR548D1	ATAD2	Intronic	1
ENSG00000284087	MIR6844	TATDN1	SO	1
ENSG00000263735	MIR4662B	AC100858.3	Intronic	1
ENSG00000283710	MIR1204	PVT1	Exonic	1
ENSG00000221771	MIR1205	PVT1	Intronic	1
ENSG00000283200	MIR1206	PVT1	Intronic	1
ENSG00000221176	MIR1207	PVT1	Intronic	1
ENSG00000263763	MIR3686	CCDC26	Intronic	1
ENSG00000264653	MIR5194	FAM49B	Intronic	1
ENSG00000276961	MIR7848	SLA	Intronic	1
ENSG00000254324	MIR151A	PTK2	Intronic	1
ENSG00000265660	MIR4664	FAM83H	Intronic	1
ENSG00000284224	MIR937	SCRIB	SO	1
ENSG00000284142	MIR6845	NRBP2	Exonic	1
ENSG00000207574	MIR661	PLEC	Intronic	1
ENSG00000277888	MIR6846	OPLAH	Intronic	1
ENSG00000284200	MIR6847	EXOSC4	Exonic	1
ENSG00000284054	MIR7112	BOP1	Exonic	1
ENSG00000284229	MIR6848	DGAT1	SO	1
ENSG00000284310	MIR939	CPSF1	Exonic	1
ENSG00000284139	MIR1234	CPSF1	Exonic	1
ENSG00000283770	MIR6849	CPSF1	Exonic	1
ENSG00000276598	MIR6893	TONSL	Intronic	1
ENSG00000283764	MIR6850	RPL8	SO	1
ENSG00000283921	MIR1302-9	AL928970.1	Exonic	1
ENSG00000199065	MIR101-2	RCL1	Intronic	1
ENSG00000264638	MIR3152	ADAMTSL1	Intronic	1
ENSG00000263790	MIR4473	MLLT3	Intronic	1
ENSG00000264941	MIR4474	MLLT3	Intronic	1
ENSG00000207609	MIR491	FOCAD	Intronic	1
ENSG00000199177	MIR31	MIR31HG	Intronic	1
ENSG00000275651	MIR6851	NOL6	Intronic	1
ENSG00000263892	MIR4667	TESK1	Intronic	1
ENSG00000284195	MIR6852	TLN1	SO	1
ENSG00000273945	MIR6853	CREB3	Intronic	1
ENSG00000264922	MIR4540	PAX5	Intronic	1
ENSG00000265368	MIR4476	PAX5	Intronic	1
ENSG00000207935	MIR204	TRPM3	Intronic	1
ENSG00000284179	MIR7-1	HNRNPK	Exonic	1
ENSG00000265112	MIR3153	CKS2	Intronic	1
ENSG00000263967	MIR4290	MIR4290HG	Intronic	1
ENSG00000283351	MIR3910-2	ROR2	Intronic	1
ENSG00000281156	MIR3651	IARS	Intronic	1
ENSG00000264158	MIR4670	ECM2	Intronic	1
ENSG00000283146	MIR548AU	PHF2	Intronic	1
ENSG00000199165	MIRLET7A1	AL158152.2	Intronic	1
ENSG00000199072	MIRLET7F1	AL158152.2	Intronic	1
ENSG00000199133	MIRLET7D	AL158152.2	Intronic	1
ENSG00000252153	MIR2278	C9orf3	Intronic	1
ENSG00000274115	MIR6081	C9orf3	Intronic	1
ENSG00000207563	MIR23B	C9orf3	Intronic	1
ENSG00000207864	MIR27B	C9orf3	Intronic	1
ENSG00000284459	MIR24-1	C9orf3	Exonic	1
ENSG00000278412	MIR6854	TBC1D2	Intronic	1
ENSG00000277889	MIR8081	LINC01505	Intronic	1
ENSG00000207698	MIR32	TMEM245	Intronic	1
ENSG00000274263	MIR7702	AL162414.1	Intronic	1
ENSG00000266315	MIR4668	UGCG	Intronic	1
ENSG00000207726	MIR455	COL27A1	Intronic	1
ENSG00000283941	MIR600	MIR600HG|STRBP	Exonic|Intronic	2
ENSG00000207991	MIR601	DENND1A	Intronic	1
ENSG00000274932	MIR7150	DENND1A	Intronic	1
ENSG00000207595	MIR181A2	MIR181A2HG	Intronic	1
ENSG00000207737	MIR181B2	MIR181A2HG	Intronic	1
ENSG00000283874	MIR3911	AL162426.1|PTRH1	Exonic|Exonic	2
ENSG00000283863	MIR3960	CDK9	Exonic	1
ENSG00000284547	MIR2861	CDK9	Exonic	1
ENSG00000263979	MIR4672	AK1|AL157935.2	Intronic|Intronic	2
ENSG00000284185	MIR219A2	AL359091.1	Exonic	1
ENSG00000276124	MIR6855	USP20	Intronic	1
ENSG00000277713	MIR6856	FUBP3	Intronic	1
ENSG00000263816	MIR548AW	GFI1B	Intronic	1
ENSG00000273932	MIR6877	GTF3C5	Intronic	1
ENSG00000263897	MIR4669	RXRA	Intronic	1
ENSG00000263403	MIR4673	NOTCH1	Intronic	1
ENSG00000199161	MIR126	EGFL7	Intronic	1
ENSG00000278756	MIR6722	AL355987.1|LCN6	Intronic|Intronic	2
ENSG00000265806	MIR4292	RABL6	Intronic	1
ENSG00000266507	MIR4479	TRAF2	Intronic	1
ENSG00000263697	MIR3621	LRRC26|AL929554.1	Intronic|Intronic	2
ENSG00000284317	MIR7114	NSMF	Exonic	1
ENSG00000207693	MIR602	EHMT1	Intronic	1
ENSG00000283920	MIR6743	RIC8A	Exonic	1
ENSG00000199038	MIR210	MIR210HG	Intronic	1
ENSG00000275669	MIR6744	MUC5B	Intronic	1
ENSG00000284594	MIR7847	LSP1	SO	1
ENSG00000284010	MIR675	H19	Exonic	1
ENSG00000207805	MIR483	IGF2|IGF2|INS-IGF2	Intronic|Intronic|Intronic	3
ENSG00000284525	MIR4687	STIM1	Exonic	1
ENSG00000264984	MIR5691	SCUBE2	Intronic	1
ENSG00000283813	MIR4485	MTRNR2L8	Exonic	1
ENSG00000275373	MIR6124	MICAL2	Intronic	1
ENSG00000284094	MIR6073	SOX6	Exonic	1
ENSG00000265210	MIR4486	NAV2	Intronic	1
ENSG00000251862	MIR1343	PDHX	Intronic	1
ENSG00000263389	MIR3973	LDLRAD3	Intronic	1
ENSG00000211568	MIR670	AC068205.1	Intronic	1
ENSG00000199077	MIR129-2	AC068205.1|AC068205.2	Intronic|Intronic	2
ENSG00000264102	MIR4688	DGKZ	Intronic	1
ENSG00000265014	MIR3160-1	AMBRA1	Intronic	1
ENSG00000263540	MIR5582	CKAP5	Intronic	1
ENSG00000275208	MIR6745	PACSIN3	Intronic	1
ENSG00000263693	MIR3161	PTPRJ	Intronic	1
ENSG00000208009	MIR130A	AP000662.1	Intronic	1
ENSG00000264559	MIR3162	OSBP	Intronic	1
ENSG00000275344	MIR6503	MS4A4E	Intronic	1
ENSG00000284108	MIR611	TMEM258	Exonic	1
ENSG00000284416	MIR1908	FADS1	Exonic	1
ENSG00000277892	MIR6746	FADS3	Intronic	1
ENSG00000276102	MIR6747	EEF1G|AP002990.1	Intronic|Intronic	2
ENSG00000284535	MIR6748	TMEM179B	Exonic	1
ENSG00000274066	MIR6514	NXF1	Intronic	1
ENSG00000221273	MIR1237	RPS6KA4	Intronic	1
ENSG00000283926	MIR192	MIR194-2HG	Exonic	1
ENSG00000284155	MIR194-2	MIR194-2HG	Exonic	1
ENSG00000274986	MIR6750	ATG2A	Intronic	1
ENSG00000274314	MIR6749	ATG2A	Intronic	1
ENSG00000278851	MIR6879	ARL2|ARL2-SNX15	Intronic|Intronic	2
ENSG00000284489	MIR6751	SYVN1	Exonic	1
ENSG00000283791	MIR612	NEAT1	Exonic	1
ENSG00000266041	MIR4690	PCNX3	Intronic	1
ENSG00000265874	MIR4489	SIPA1	Intronic	1
ENSG00000266423	MIR3163	PC	Intronic	1
ENSG00000283326	MIR6860	SYT12	Intronic	1
ENSG00000276769	MIR6752	AIP	Intronic	1
ENSG00000284293	MIR7113	NDUFS8	Exonic	1
ENSG00000284435	MIR4691	NDUFS8	Exonic	1
ENSG00000275022	MIR6753	TCIRG1	Intronic	1
ENSG00000265539	MIR3164	TPCN2	Intronic	1
ENSG00000221333	MIR548K	PPFIA1	Intronic	1
ENSG00000263744	MIR3664	SHANK2	Intronic	1
ENSG00000278349	MIR6754	NADSYN1	Intronic	1
ENSG00000263742	MIR3165	NUMA1	Intronic	1
ENSG00000272036	MIR139	PDE2A	Intronic	1
ENSG00000264402	MIR548AL	AP001372.1	Intronic	1
ENSG00000265902	MIR4696	CHRDL2	Intronic	1
ENSG00000199090	MIR326	ARRB1	Intronic	1
ENSG00000211997	MIR708	TENM4	Intronic	1
ENSG00000266570	MIR5579	TENM4	Intronic	1
ENSG00000264110	MIR4300	MIR4300HG	Intronic	1
ENSG00000283744	MIR6755	EED	Exonic	1
ENSG00000284458	MIR1304	TAF1D	Exonic	1
ENSG00000221230	MIR548L	MRE11	Intronic	1
ENSG00000263885	MIR3920	TRPC6	Intronic	1
ENSG00000265140	MIR4301	DRD2	Intronic	1
ENSG00000284246	MIR6716	PHLDB1	Exonic	1
ENSG00000283704	MIR3656	TRAPPC4	Exonic	1
ENSG00000284148	MIR6756	MCAM	Exonic	1
ENSG00000207971	MIR125B1	MIR100HG	Intronic	1
ENSG00000198975	MIRLET7A2	MIR100HG	Intronic	1
ENSG00000207994	MIR100	MIR100HG	Intronic	1
ENSG00000266215	MIR3167	KIRREL3	Intronic	1
ENSG00000284020	MIR4697	MIR4697HG	Exonic	1
ENSG00000263511	MIR5699	DIP2C	Intronic	1
ENSG00000263628	MIR3155A	PFKFB3	Intronic	1
ENSG00000263584	MIR4480	CAMK1D	Intronic	1
ENSG00000266321	MIR4293	FRMD4A	Intronic	1
ENSG00000207938	MIR511	MRC1	Intronic	1
ENSG00000222071	MIR1915	CASC10	Intronic	1
ENSG00000207930	MIR603	KIAA1217	Intronic	1
ENSG00000275036	MIR8086	MPP7	Intronic	1
ENSG00000207612	MIR604	SVIL	Intronic	1
ENSG00000216035	MIR938	SVIL	Intronic	1
ENSG00000284277	MIR7162	MTPAP|GOLGA2P6	SO|SO	2
ENSG00000266228	MIR3611	CUL2	Intronic	1
ENSG00000284265	MIR4683	FZD8	Exonic	1
ENSG00000263476	MIR3156-1	AL358394.2|ANKRD30BP3	Intronic|Intronic	2
ENSG00000264800	MIR4294	AC060234.2	Intronic	1
ENSG00000207813	MIR605	PRKG1	Intronic	1
ENSG00000221594	MIR548F1	PCDH15	Intronic	1
ENSG00000221063	MIR1296	JMJD1C	Intronic	1
ENSG00000276866	MIR7151	CTNNA3	Intronic	1
ENSG00000221184	MIR1254-1	CCAR1	Intronic	1
ENSG00000274824	MIR7152	CDH23	Intronic	1
ENSG00000266719	MIR4676	MCU	Intronic	1
ENSG00000207583	MIR606	LRMDA	Intronic	1
ENSG00000199104	MIR346	GRID1	Intronic	1
ENSG00000198997	MIR107	PANK1	Intronic	1
ENSG00000266407	MIR3157	ENTPD1-AS1	Intronic	1
ENSG00000284415	MIR1287	PYROXD2	SO	1
ENSG00000264610	MIR4685	HPS1	Intronic	1
ENSG00000274056	MIR6507	HPSE2	Intronic	1
ENSG00000207551	MIR608	SEMA4G	Intronic	1
ENSG00000263436	MIR3158-1	DPCD	Intronic	1
ENSG00000283867	MIR1307	ATP5MD	SO	1
ENSG00000283788	MIR936	COL17A1	SO	1
ENSG00000208033	MIR609	CFAP43	Intronic	1
ENSG00000284482	MIR4680	PDCD4	Exonic	1
ENSG00000221214	MIR548E	SHOC2	Intronic	1
ENSG00000276857	MIR6715A	TECTB	Intronic	1
ENSG00000264763	MIR4295	VTI1A	Intronic	1
ENSG00000284442	MIR2110	CCDC186	Exonic	1
ENSG00000266782	MIR3663	MIR3663HG	Intronic	1
ENSG00000265719	MIR4681	GRK5	Intronic	1
ENSG00000265442	MIR3941	PLEKHA1	Intronic	1
ENSG00000264572	MIR4296	CTBP2	Intronic	1
ENSG00000266676	MIR4297	EBF3	Intronic	1
ENSG00000284219	MIR202	MIR202HG	SO	1
ENSG00000265395	MIR3944	ECHS1	Intronic	1
ENSG00000207713	MIR200C	MIR200CHG	Intronic	1
ENSG00000207708	MIR141	MIR200CHG	Intronic	1
ENSG00000283429	MIR1244-3	A2MP1	Intronic	1
ENSG00000283475	MIR1244-4	BCL2L14	Intronic	1
ENSG00000207983	MIR613	APOLD1	Intronic	1
ENSG00000283759	MIR614	GPRC5A	Exonic	1
ENSG00000278520	MIR7851	ZCRB1	Intronic	1
ENSG00000263838	MIR4698	PCED1B	Intronic	1
ENSG00000275770	MIR6505	PFKM	Intronic	1
ENSG00000281842	MIR1291	KANSL2	Intronic	1
ENSG00000264201	MIR4701	ADCY6	Intronic	1
ENSG00000221604	MIR1293	LIMA1	Intronic	1
ENSG00000278108	MIR6757	TNS2	Intronic	1
ENSG00000207924	MIR196A2	AC012531.2|HOXC6	Intronic|Intronic	2
ENSG00000207571	MIR615	AC012531.2|HOXC4|HOXC5	Intronic|Intronic|Intronic	3
ENSG00000283803	MIR3198-2	CBX5	Exonic	1
ENSG00000199122	MIR148B	AC078778.2|COPZ1	Intronic|Intronic	2
ENSG00000221365	MIR1228	LRP1	Intronic	1
ENSG00000284152	MIR6758	MARS	Exonic	1
ENSG00000208028	MIR616	DDIT3|AC022506.1	Intronic|Intronic	2
ENSG00000283621	MIR6759	CDK4	Intronic	1
ENSG00000207789	MIR26A2	CTDSP2	Intronic	1
ENSG00000284360	MIR6125	USP15	Exonic	1
ENSG00000199179	MIRLET7I	AC048341.1	Intronic	1
ENSG00000207546	MIR548C	RASSF3	Intronic	1
ENSG00000284011	MIR6502	IRAK3	Exonic	1
ENSG00000221788	MIR1252	SYT1	Intronic	1
ENSG00000207763	MIR617	LIN7A	Intronic	1
ENSG00000208022	MIR618	LIN7A	Intronic	1
ENSG00000265227	MIR4699	ACSS3	Intronic	1
ENSG00000283818	MIR7844	TMCC3	Exonic	1
ENSG00000283998	MIR492	KRT19P2	Exonic	1
ENSG00000221479	MIR1251	RMST	Intronic	1
ENSG00000207586	MIR135A2	RMST	Intronic	1
ENSG00000284503	MIR3652	HSP90B1	Exonic	1
ENSG00000264295	MIR3922	CHST11	Intronic	1
ENSG00000284388	MIR4496	AC007569.1	SO	1
ENSG00000207622	MIR619	SSH1	Intronic	1
ENSG00000273700	MIR6760	CUX2	Intronic	1
ENSG00000274697	MIR6761	ALDH2	Intronic	1
ENSG00000266370	MIR3657	NAA25	Intronic	1
ENSG00000283793	MIR6861	HECTD4	SO	1
ENSG00000276908	MIR7106	DDX54	Intronic	1
ENSG00000274822	MIR6762	TPCN1	Intronic	1
ENSG00000207967	MIR620	MED13L	Intronic	1
ENSG00000283768	MIR1178	CIT	Exonic	1
ENSG00000266704	MIR4498	GCN1	Intronic	1
ENSG00000284143	MIR4700	UNC119B	Exonic	1
ENSG00000284402	MIR7107	KDM2B	Intronic	1
ENSG00000265526	MIR4304	PITPNM2	Intronic	1
ENSG00000275967	MIR6880	NCOR2	Intronic	1
ENSG00000265635	MIR3612	TMEM132C	Intronic	1
ENSG00000277052	MIR6763	FBRSL1	Intronic	1
ENSG00000263978	MIR4499	CRYL1	Intronic	1
ENSG00000252695	MIR2276	AL359736.1|SPATA13	Intronic|Intronic	2
ENSG00000284584	MIR5006	VWA8	SO	1
ENSG00000264864	MIR3613	DLEU2	Intronic	1
ENSG00000208006	MIR16-1	DLEU2	Intronic	1
ENSG00000283785	MIR15A	DLEU2	SO	1
ENSG00000266052	MIR4500	MIR4500HG	Intronic	1
ENSG00000283783	MIR622	KRT18P27	Exonic	1
ENSG00000284536	MIR17	MIR17HG	Exonic	1
ENSG00000283815	MIR18A	MIR17HG	Exonic	1
ENSG00000284204	MIR19A	MIR17HG	Exonic	1
ENSG00000283762	MIR20A	MIR17HG	Exonic	1
ENSG00000284375	MIR19B1	MIR17HG	Exonic	1
ENSG00000283705	MIR92A1	MIR17HG	Exonic	1
ENSG00000263741	MIR548AS	GPC5|GPC5-IT1	Intronic|Intronic	2
ENSG00000283487	MIR4501	HS6ST3	Intronic	1
ENSG00000263399	MIR3170	FARP1	Intronic	1
ENSG00000207719	MIR623	UBAC2	Intronic	1
ENSG00000263615	MIR4306	CLYBL	Intronic	1
ENSG00000265164	MIR2681	FGF14	Intronic	1
ENSG00000264482	MIR4705	FGF14	Intronic	1
ENSG00000221650	MIR1267	FAM155A	Intronic	1
ENSG00000276765	MIR8073	COL4A2	Intronic	1
ENSG00000277942	MIR8075	CUL4A	Intronic	1
ENSG00000264539	MIR548AR	CDC16	Intronic	1
ENSG00000284122	MIR6717	NDRG2	Exonic	1
ENSG00000284118	MIR4707	HAUS4|AL132780.3	Exonic|Intronic	2
ENSG00000199157	MIR208A	MYH6	Intronic	1
ENSG00000215991	MIR208B	MYH7	Intronic	1
ENSG00000283856	MIR7703	PSME2	Exonic	1
ENSG00000265165	MIR4307	AL110292.1|MIR4307HG	Intronic|Intronic	2
ENSG00000264657	MIR3171	AL390334.1	Intronic	1
ENSG00000207952	MIR624	STRN3	Intronic	1
ENSG00000266327	MIR4503	SLC25A21	Intronic	1
ENSG00000264712	MIR4504	L2HGDH	Intronic	1
ENSG00000265432	MIR4308	GCH1	Intronic	1
ENSG00000263629	MIR5586	RTN1	Intronic	1
ENSG00000221537	MIR548H1	ESR2	Intronic	1
ENSG00000284269	MIR7855	SPTB	SO	1
ENSG00000266531	MIR4706	CHURC1-FNTB|FNTB	Intronic|Intronic	2
ENSG00000207781	MIR625	FUT8	Intronic	1
ENSG00000273830	MIR7843	RGS6	Intronic	1
ENSG00000283944	MIR4709	NPC2	Exonic	1
ENSG00000280494	MIR7641-2	FLVCR2|RNA5SP387	Intronic|Exonic	2
ENSG00000265768	MIR4506	ASB2	Intronic	1
ENSG00000264607	MIR3173	DICER1	Intronic	1
ENSG00000199082	MIR342	EVL	Intronic	1
ENSG00000283840	MIR6764	YY1	Exonic	1
ENSG00000266461	MIR2392	MEG3	Intronic	1
ENSG00000211574	MIR770	MEG3|AL117190.1	Exonic|Intronic	2
ENSG00000207989	MIR493	AL117190.1	Intronic	1
ENSG00000199151	MIR337	AL117190.1	Intronic	1
ENSG00000283159	MIR665	AL117190.1	Intronic	1
ENSG00000208001	MIR431	AL117190.1	Intronic	1
ENSG00000207569	MIR433	AL117190.1	Intronic	1
ENSG00000207608	MIR127	AL117190.1	Intronic	1
ENSG00000272458	MIR432	AL117190.1	Intronic	1
ENSG00000207942	MIR136	AL117190.1	Intronic	1
ENSG00000199005	MIR370	AL117190.1|MEG8	Intronic|Intronic	2
ENSG00000199088	MIR379	MEG8	Intronic	1
ENSG00000199109	MIR411	MEG8	Intronic	1
ENSG00000207749	MIR299	MEG8	Intronic	1
ENSG00000198982	MIR380	MEG8	Intronic	1
ENSG00000221745	MIR1197	MEG8	Intronic	1
ENSG00000199069	MIR323A	MEG8	Intronic	1
ENSG00000211582	MIR758	MEG8	Intronic	1
ENSG00000207761	MIR329-1	MEG8	Intronic	1
ENSG00000207762	MIR329-2	MEG8	Intronic	1
ENSG00000194717	MIR494	MEG8	Intronic	1
ENSG00000221036	MIR1193	MEG8	Intronic	1
ENSG00000212040	MIR543	MEG8	Intronic	1
ENSG00000207743	MIR495	MEG8	Intronic	1
ENSG00000199020	MIR381	MIR381HG	Intronic	1
ENSG00000207754	MIR487B	MIR381HG	Intronic	1
ENSG00000202560	MIR539	MIR381HG	Intronic	1
ENSG00000216099	MIR889	MIR381HG	Intronic	1
ENSG00000207587	MIR544A	MIR381HG	Intronic	1
ENSG00000207646	MIR655	MIR381HG	Intronic	1
ENSG00000216179	MIR541	MEG9	Intronic	1
ENSG00000199107	MIR409	MEG9	Intronic	1
ENSG00000199012	MIR412	MEG9	Intronic	1
ENSG00000199025	MIR369	MEG9	Intronic	1
ENSG00000199092	MIR410	MEG9	Exonic	1
ENSG00000207959	MIR656	MEG9	Intronic	1
ENSG00000283857	MIR1247	DIO3OS	Exonic	1
ENSG00000273778	MIR6765	JAG2	Intronic	1
ENSG00000266517	MIR4715	ATP10A	Intronic	1
ENSG00000207702	MIR211	TRPM1	Intronic	1
ENSG00000221649	MIR1233-1	GOLGA8A	Intronic	1
ENSG00000221065	MIR1233-2	GOLGA8B	Intronic	1
ENSG00000265102	MIR3942	DPH6	Intronic	1
ENSG00000277202	MIR8063	MEIS2	Intronic	1
ENSG00000207766	MIR626	MGA	Intronic	1
ENSG00000264850	MIR4310	SPTBN5	Intronic	1
ENSG00000207712	MIR627	VPS39	Intronic	1
ENSG00000221792	MIR1282	AC018512.1	Intronic	1
ENSG00000284386	MIR147B	C15orf48	Exonic	1
ENSG00000284284	MIR4712	GABPB1-AS1	Exonic	1
ENSG00000266593	MIR4713	MIR4713HG	Intronic	1
ENSG00000283614	MIR7973-2	CYP19A1	Intronic	1
ENSG00000221052	MIR1266	MYO5C	Intronic	1
ENSG00000283891	MIR628	CCPG1|DNAAF4-CCPG1	SO|Intronic	2
ENSG00000253030	MIR2116	MYO1E	Intronic	1
ENSG00000211137	MIR190A	TLN2	Intronic	1
ENSG00000221033	MIR1272	RBPMS2	Intronic	1
ENSG00000264737	MIR4511	DENND4A	Intronic	1
ENSG00000266589	MIR4512	SNAPC5	Intronic	1
ENSG00000265195	MIR4312	ANP32A	Intronic	1
ENSG00000207965	MIR629	TLE3	Intronic	1
ENSG00000283798	MIR630	ARIH1	Exonic	1
ENSG00000277391	MIR6881	SEMA7A	Intronic	1
ENSG00000275411	MIR6882	ULK3	Intronic	1
ENSG00000284385	MIR4313	AC019294.3	Exonic	1
ENSG00000284059	MIR5572	ARNT2	SO	1
ENSG00000263643	MIR4515	AC022558.2|AC024270.2	Intronic|Intronic	2
ENSG00000284160	MIR7706	AKAP13	Exonic	1
ENSG00000221634	MIR1276	KLHL25	Intronic	1
ENSG00000275101	MIR6766	POLG	Intronic	1
ENSG00000284329	MIR9-3	MIR9-3HG	Intronic	1
ENSG00000264966	MIR5094	AP3S2|C15orf38-AP3S2	Intronic|Intronic	2
ENSG00000264796	MIR5009	AP3S2|C15orf38-AP3S2	Intronic|Intronic	2
ENSG00000265871	MIR3174	ZNF710	Intronic	1
ENSG00000284324	MIR3175	AC013394.1|CHD2	Intronic|SO	2
ENSG00000283888	MIR1469	NR2F2	Exonic	1
ENSG00000264480	MIR4714	IGF1R	Intronic	1
ENSG00000284557	MIR1302-10	AC140725.1	SO	1
ENSG00000275449	MIR6859-3	WASH3P	Intronic	1
ENSG00000278739	MIR6859-4	WASH4P	Intronic	1
ENSG00000266124	MIR5587	CAPN15	Intronic	1
ENSG00000266235	MIR3176	CAPN15	Intronic	1
ENSG00000265820	MIR3177	MAPK8IP3	Intronic	1
ENSG00000221656	MIR1225	PKD1	Intronic	1
ENSG00000284008	MIR6511B1	PKD1	SO	1
ENSG00000266643	MIR3677	AC009065.4	Intronic	1
ENSG00000284346	MIR940	AC009065.4	Exonic	1
ENSG00000283180	MIR6767	CCNF	Intronic	1
ENSG00000274805	MIR6768	TEDC2	Intronic	1
ENSG00000276641	MIR6769A	MGRN1	Intronic	1
ENSG00000273648	MIR8065	RBFOX1	Intronic	1
ENSG00000207639	MIR193B	MIR193BHG	Intronic	1
ENSG00000199130	MIR365A	MIR193BHG	Intronic	1
ENSG00000284305	MIR3179-1	AC136443.3	Exonic	1
ENSG00000275259	MIR6511A1	AC138932.1|NPIPA1	Intronic|Intronic	2
ENSG00000278265	MIR6770-1	AC138932.1|NPIPA1	Intronic|Intronic	2
ENSG00000283346	MIR6511B2	PKD1P6	Intronic	1
ENSG00000284184	MIR6506	MARF1	Exonic	1
ENSG00000283736	MIR484	NDE1	Exonic	1
ENSG00000278221	MIR6511A2	PKD1P1|PKD1P1	Intronic|Intronic	2
ENSG00000277698	MIR6770-2	PKD1P1|PKD1P1	Intronic|Intronic	2
ENSG00000276311	MIR6511A3	AC138969.1	Intronic	1
ENSG00000273613	MIR6511A4	AC126755.7|AC126755.1	Intronic|Intronic	2
ENSG00000275391	MIR6770-3	PKD1P5	Intronic	1
ENSG00000274025	MIR3670-4	NOMO2	Intronic	1
ENSG00000277014	MIR3179-4	NOMO2	Intronic	1
ENSG00000265462	MIR3680-1	SMG1P3	Intronic	1
ENSG00000274466	MIR1273H	PRKCB	Intronic	1
ENSG00000265005	MIR548W	HS3ST4|AC093516.1	Intronic|Intronic	2
ENSG00000275429	MIR6862-1	EIF3CL	Intronic	1
ENSG00000278340	MIR6862-2	EIF3C	Intronic	1
ENSG00000283845	MIR4721	TUFM	SO	1
ENSG00000284541	MIR4517	NFATC2IP	Exonic	1
ENSG00000266305	MIR4518	ITGAL	Intronic	1
ENSG00000265991	MIR4519	BCL7C	Intronic	1
ENSG00000211591	MIR762	MIR762HG	Intronic	1
ENSG00000274969	MIR6771	ADCY7	Intronic	1
ENSG00000264947	MIR3181	CYLD	Intronic	1
ENSG00000265281	MIR3935	GNAO1	Intronic	1
ENSG00000283471	MIR6863	SLC12A3	Intronic	1
ENSG00000274816	MIR6772	KIFC3	Intronic	1
ENSG00000284259	MIR6773	ESRP2	Exonic	1
ENSG00000208017	MIR140	WWP2	Intronic	1
ENSG00000266426	MIR4719	AC106729.1	Intronic	1
ENSG00000284473	MIR4720	GAN	Exonic	1
ENSG00000277255	MIR7854	CMIP	Intronic	1
ENSG00000275109	MIR6504	CMIP	Intronic	1
ENSG00000277387	MIR8058	CDH13	Intronic	1
ENSG00000263785	MIR3182	CDH13	Intronic	1
ENSG00000283416	MIR1910	C16orf74	Intronic	1
ENSG00000274134	MIR6774	IRF8	Intronic	1
ENSG00000278598	MIR6775	SLC7A5	Intronic	1
ENSG00000263456	MIR5189	ZFPM1	Intronic	1
ENSG00000284585	MIR4722	PIEZO1	Intronic	1
ENSG00000264429	MIR3183	ABR	Intronic	1
ENSG00000283824	MIR22	MIR22HG	Exonic	1
ENSG00000273606	MIR6776	CLUH	Intronic	1
ENSG00000221200	MIR1253	CCDC92B	Intronic	1
ENSG00000274300	MIR6864	CAMTA2	Intronic	1
ENSG00000278517	MIR6865	CAMTA2	Intronic	1
ENSG00000283301	MIR4520-2	C17orf100	Intronic	1
ENSG00000284112	MIR195	AC040977.2|MIR497HG	Intronic|Exonic	2
ENSG00000284027	MIR497	AC040977.2|MIR497HG	Intronic|Exonic	2
ENSG00000284117	MIR6883	PER1	Exonic	1
ENSG00000266297	MIR744	MAP2K4	Intronic	1
ENSG00000221698	MIR548H3	HS3ST3A1	Intronic	1
ENSG00000265110	MIR4731	PMP22	Intronic	1
ENSG00000221355	MIR1288	PIGL	Intronic	1
ENSG00000274111	MIR6777	SREBF1	Intronic	1
ENSG00000207839	MIR33B	SREBF1	Intronic	1
ENSG00000283772	MIR6778	SHMT1	Exonic	1
ENSG00000221540	MIR1180	B9D1	Intronic	1
ENSG00000284532	MIR4723	TMEM199|AC002094.1	Exonic|Intronic	2
ENSG00000284565	MIR451A	AC024267.1	Exonic	1
ENSG00000283819	MIR144	AC024267.1	Exonic	1
ENSG00000284085	MIR4732	AC024267.1	Exonic	1
ENSG00000284162	MIR4523	AC068025.2|TAOK1	Intronic|Exonic	2
ENSG00000283935	MIR423	NSRP1	Exonic	1
ENSG00000284399	MIR3184	AC104984.2|AC104984.5	Intronic|Exonic	2
ENSG00000265444	MIR4733	AC138207.2	Intronic	1
ENSG00000284424	MIR4724	RAB11FIP4	Exonic	1
ENSG00000265976	MIR4725	AC003101.1	Intronic	1
ENSG00000283978	MIR365B	AC003101.1	SO	1
ENSG00000283774	MIR632	AC005899.4	Intronic	1
ENSG00000276326	MIR2909	AATF	Intronic	1
ENSG00000274620	MIR378J	DDX52	Intronic	1
ENSG00000273627	MIR4726	MLLT6	Intronic	1
ENSG00000277057	MIR6779	LASP1	Intronic	1
ENSG00000265178	MIR4728	ERBB2	Intronic	1
ENSG00000283721	MIR6884	MED24	Exonic	1
ENSG00000284144	MIR6866	CASC3	Exonic	1
ENSG00000274621	MIR6867	RAPGEFL1	Intronic	1
ENSG00000283796	MIR6510	KRT15	SO	1
ENSG00000264314	MIR548AT	ATP6V0A1	Intronic	1
ENSG00000283929	MIR5010	ATP6V0A1	SO	1
ENSG00000275273	MIR6780A	EZH1	Intronic	1
ENSG00000278447	MIR6781	BECN1	Intronic	1
ENSG00000284344	MIR2117	MIR2117HG	Exonic	1
ENSG00000275107	MIR6782	UBTF	Intronic	1
ENSG00000278223	MIR6783	KIF18B	Intronic	1
ENSG00000277249	MIR6784	PLCD3	Intronic	1
ENSG00000284055	MIR4315-1	PLEKHM1	Exonic	1
ENSG00000264999	MIR5089	GOSR2|AC005670.2	Intronic|Intronic	2
ENSG00000207947	MIR152	COPZ2	Intronic	1
ENSG00000221739	MIR1203	SKAP1	Intronic	1
ENSG00000284038	MIR10A	HOXB3|HOXB4|AC103702.1	Intronic|Exonic|Exonic	3
ENSG00000210741	MIR196A1	HOXB7	Intronic	1
ENSG00000277478	MIR6165	NGFR	Intronic	1
ENSG00000284542	MIR3614	TRIM25	Exonic	1
ENSG00000284353	MIR142	AC004687.1	Exonic	1
ENSG00000211514	MIR454	SKA2	Intronic	1
ENSG00000207996	MIR301A	SKA2	Intronic	1
ENSG00000263857	MIR4729	YPEL2	Intronic	1
ENSG00000284190	MIR21	VMP1	Exonic	1
ENSG00000284564	MIR3064	DDX5	Exonic	1
ENSG00000284368	MIR5047	DDX5	Exonic	1
ENSG00000284172	MIR4315-2	PLEKHM1P1	Exonic	1
ENSG00000207943	MIR634	PRKCA	Intronic	1
ENSG00000207688	MIR548AA2	PITPNC1	Intronic	1
ENSG00000207561	MIR635	WIPI1	Intronic	1
ENSG00000283385	MIR4524A	ABCA6	Intronic	1
ENSG00000284595	MIR6785	TMEM94	Exonic	1
ENSG00000283853	MIR4738	H3F3B	Exonic	1
ENSG00000275360	MIR6868	EXOC7	Intronic	1
ENSG00000283805	MIR636	SRSF2	Exonic	1
ENSG00000284250	MIR6516	SNHG20|SEC14L1	Exonic|Intronic	2
ENSG00000265561	MIR1268B	CCDC40	Intronic	1
ENSG00000264961	MIR4730	ENDOV	Intronic	1
ENSG00000207736	MIR657	AATK	Intronic	1
ENSG00000283604	MIR338	AATK	Intronic	1
ENSG00000221025	MIR1250	AATK	Intronic	1
ENSG00000277784	MIR6786	HGS	Intronic	1
ENSG00000284574	MIR6787	SLC16A3	Exonic	1
ENSG00000266107	MIR4525	RAB40B	Intronic	1
ENSG00000275518	MIR6718	DLGAP1-AS3	Intronic	1
ENSG00000272380	MIR3976	MIR3976HG	Intronic	1
ENSG00000283532	MIR4317	L3MBTL4	Intronic	1
ENSG00000274838	MIR6788	PIEZO2	Intronic	1
ENSG00000266146	MIR5190	LDLRAD4	Intronic	1
ENSG00000263527	MIR4526	LDLRAD4	Intronic	1
ENSG00000265499	MIR3156-2	ANKRD30B	Intronic	1
ENSG00000283927	MIR133A1	MIR133A1HG	Exonic	1
ENSG00000284453	MIR1-2	MIR133A1HG	Exonic	1
ENSG00000284331	MIR4741	RBBP8	Exonic	1
ENSG00000276221	MIR8057	KCTD1	Intronic	1
ENSG00000283514	MIR3975	GALNT1	Intronic	1
ENSG00000266530	MIR4318	AC009899.1	Intronic	1
ENSG00000283615	MIR924	AC016205.1	Intronic	1
ENSG00000283645	MIR5583-2	AC016205.1	Intronic	1
ENSG00000266582	MIR4527	MIR4527HG	Intronic	1
ENSG00000266276	MIR4743	CTIF	Intronic	1
ENSG00000263849	MIR4744	DYM	Intronic	1
ENSG00000284239	MIR1539	AC100778.3	Exonic	1
ENSG00000283343	MIR4320	MYO5B	Intronic	1
ENSG00000263872	MIR4528	DCC	Intronic	1
ENSG00000264571	MIR4529	TCF4-AS1	Intronic	1
ENSG00000284440	MIR122	MIR122HG	Exonic	1
ENSG00000263750	MIR548AV	NETO1	Intronic	1
ENSG00000284436	MIR6869	AL136531.2|FKBP1A	Intronic|Exonic	2
ENSG00000284481	MIR1292	NOP56	Exonic	1
ENSG00000199024	MIR103A2	PANK2	Intronic	1
ENSG00000273745	MIR6870	JAG1	Intronic	1
ENSG00000265137	MIR3192	POLR3F	Intronic	1
ENSG00000284419	MIR663A	MIR663AHG	SO	1
ENSG00000284125	MIR1825	POFUT1	Exonic	1
ENSG00000264616	MIR4755	RALY	Intronic	1
ENSG00000207997	MIR644A	ITCH	Intronic	1
ENSG00000207635	MIR499A	MYH7B	Intronic	1
ENSG00000221763	MIR1289-1	GDF5	Intronic	1
ENSG00000275453	MIR548O2	RALGAPB	Intronic	1
ENSG00000276169	MIR6871	PLCG1	Intronic	1
ENSG00000266151	MIR3646	HNF4A	Intronic	1
ENSG00000273555	MIR6812	PIGT	Intronic	1
ENSG00000264901	MIR3616	EYA2	Intronic	1
ENSG00000221091	MIR1302-5	RIPOR3	Intronic	1
ENSG00000266761	MIR3194	NFATC2	Intronic	1
ENSG00000265595	MIR4756	BCAS1	Intronic	1
ENSG00000284040	MIR296	AL132655.2	Exonic	1
ENSG00000207802	MIR646	MIR646HG	Intronic	1
ENSG00000266140	MIR4533	MIR646HG	Intronic	1
ENSG00000284193	MIR1257	TAF4	Exonic	1
ENSG00000284074	MIR4758	LAMA5	SO	1
ENSG00000199017	MIR1-1	MIR1-1HG	Intronic	1
ENSG00000284508	MIR133A2	MIR1-1HG	SO	1
ENSG00000266463	MIR3196	BIRC7	Intronic	1
ENSG00000266104	MIR4326	ARFGAP1	Intronic	1
ENSG00000283206	MIR941-1	DNAJC5	Intronic	1
ENSG00000216141	MIR941-2	DNAJC5	Intronic	1
ENSG00000283513	MIR941-3	DNAJC5	Intronic	1
ENSG00000216195	MIR941-4	DNAJC5	Intronic	1
ENSG00000275842	MIR941-5	DNAJC5	Intronic	1
ENSG00000284433	MIR1914	UCKL1	Exonic	1
ENSG00000207554	MIR647	UCKL1	Intronic	1
ENSG00000274034	MIR6813	RGS19	Intronic	1
ENSG00000283801	MIR1302-11	AC008993.3	Exonic	1
ENSG00000284361	MIR4745	PTBP1	Exonic	1
ENSG00000284216	MIR1909	REXO1	Exonic	1
ENSG00000221411	MIR1227	PLEKHJ1	Intronic	1
ENSG00000284129	MIR6789	PLEKHJ1	Exonic	1
ENSG00000284272	MIR4321	AMH	Exonic	1
ENSG00000283728	MIR7108	LMNB2	SO	1
ENSG00000283928	MIR637	DAPK3	Exonic	1
ENSG00000207630	MIR7-3	MIR7-3HG	Intronic	1
ENSG00000263409	MIR4747	UHRF1	Intronic	1
ENSG00000274390	MIR6885	GTF2F1|AC011491.2	Intronic|Intronic	2
ENSG00000273758	MIR6790	GTF2F1	Intronic	1
ENSG00000284159	MIR3940	KHSRP	SO	1
ENSG00000283950	MIR6791	GPR108	Exonic	1
ENSG00000273657	MIR6792	CAMSAP3	Intronic	1
ENSG00000265390	MIR4999	RAB11B-AS1	Intronic	1
ENSG00000266204	MIR5589	C3P1	Intronic	1
ENSG00000284268	MIR1181	CDC37	Exonic	1
ENSG00000221410	MIR1238	ATG4D	Intronic	1
ENSG00000207972	MIR638	DNM2	Intronic	1
ENSG00000265879	MIR4748	DNM2	Intronic	1
ENSG00000275640	MIR6793	DNM2	Intronic	1
ENSG00000284553	MIR6886	LDLR	SO	1
ENSG00000274713	MIR7974	AC008481.3|ZNF653	Intronic|Intronic	2
ENSG00000276181	MIR6794	MAST1	Intronic	1
ENSG00000274417	MIR6515	CALR	Intronic	1
ENSG00000284387	MIR24-2	AC020916.1	Exonic	1
ENSG00000207808	MIR27A	AC020916.1	Exonic	1
ENSG00000207980	MIR23A	AC020916.1	Exonic	1
ENSG00000207613	MIR181C	NANOS3	Intronic	1
ENSG00000207585	MIR181D	NANOS3	Intronic	1
ENSG00000284081	MIR1199	MISP3	Exonic	1
ENSG00000283822	MIR639	TECR	SO	1
ENSG00000275711	MIR6795	NOTCH3	Intronic	1
ENSG00000264175	MIR3189	GDF15	Intronic	1
ENSG00000207821	MIR640	GATAD2A	Intronic	1
ENSG00000238517	MIR1270	ZNF826P	Intronic	1
ENSG00000284065	MIR6887	AC020907.6|FXYD3	Intronic|Exonic	2
ENSG00000284034	MIR5196	CD22	SO	1
ENSG00000277759	MIR6719	DYRK1B	Intronic	1
ENSG00000207631	MIR641	AKT2	Intronic	1
ENSG00000275652	MIR6796	PLD3	Intronic	1
ENSG00000276926	MIR6797	RPS19	Intronic	1
ENSG00000266226	MIR4323	POU2F2	Intronic	1
ENSG00000277533	MIR8077	MEGF8	Intronic	1
ENSG00000283673	MIR4531	AC243964.2	Intronic	1
ENSG00000284258	MIR8085	BCL3	Exonic	1
ENSG00000284544	MIR330	EML2	Exonic	1
ENSG00000207773	MIR642A	GIPR	Intronic	1
ENSG00000211580	MIR769	CCDC61	Intronic	1
ENSG00000211513	MIR320E	PRKD2	Intronic	1
ENSG00000284411	MIR3191	BBC3	Exonic	1
ENSG00000273898	MIR6798	RUVBL2	Intronic	1
ENSG00000265407	MIR4324	SLC6A16	Intronic	1
ENSG00000274306	MIR5088	PRMT1	Intronic	1
ENSG00000276270	MIR6799	AP2A1	Intronic	1
ENSG00000284114	MIR6800	MED25	Exonic	1
ENSG00000265954	MIR4749	PTOV1	Intronic	1
ENSG00000284394	MIR4750	TBC1D17	Exonic	1
ENSG00000283842	MIR4751	ATF5	Exonic	1
ENSG00000207550	MIR99B	SPACA6	Intronic	1
ENSG00000198972	MIRLET7E	SPACA6	Intronic	1
ENSG00000208008	MIR125A	SPACA6	Intronic	1
ENSG00000274380	MIR6801	PPP2R1A	Intronic	1
ENSG00000208002	MIR643	ZNF766	Intronic	1
ENSG00000284362	MIR519A2	AC011453.1	Exonic	1
ENSG00000284568	MIR371B	AC008753.3	Exonic	1
ENSG00000284583	MIR935	CACNG8	Exonic	1
ENSG00000277636	MIR8061	LILRB4	Intronic	1
ENSG00000275519	MIR6804	PPP6R1	Intronic	1
ENSG00000278328	MIR6802	PPP6R1	Intronic	1
ENSG00000278264	MIR6803	PPP6R1	Intronic	1
ENSG00000284029	MIR6805	RPL28	Exonic	1
ENSG00000277588	MIR6806	ZSCAN22	Intronic	1
ENSG00000275924	MIR6807	TRIM28	Intronic	1
ENSG00000264757	MIR3198-1	BID	Intronic	1
ENSG00000207780	MIR648	MICAL3	Intronic	1
ENSG00000284031	MIR4761	COMT	SO	1
ENSG00000208023	MIR185	TANGO2	Intronic	1
ENSG00000284140	MIR3618	DGCR8	Exonic	1
ENSG00000284464	MIR1306	DGCR8	Exonic	1
ENSG00000278278	MIR6816	TRMT2A	Intronic	1
ENSG00000221039	MIR1286	RTN4R	Intronic	1
ENSG00000212102	MIR301B	AP000553.1	Intronic	1
ENSG00000283871	MIR130B	AP000553.1	SO	1
ENSG00000284049	MIR650	IGLV2-8	SO	1
ENSG00000277872	MIR6817	CRYBB2P1	Intronic	1
ENSG00000221760	MIR548J	TPST2	Intronic	1
ENSG00000283225	MIR3199-2	TTC28-AS1	Intronic	1
ENSG00000280968	MIR3653	AP1B1	Intronic	1
ENSG00000275818	MIR6818	MTMR3	Intronic	1
ENSG00000264661	MIR3200	OSBP2	Intronic	1
ENSG00000284082	MIR7109	PISD	Exonic	1
ENSG00000266012	MIR4764	LARGE1	Intronic	1
ENSG00000266320	MIR3909	TOM1	Intronic	1
ENSG00000278420	MIR6819	MYH9	Intronic	1
ENSG00000284197	MIR658	ANKRD54	Exonic	1
ENSG00000207696	MIR659	ANKRD54	Intronic	1
ENSG00000284289	MIR6820	POLR2F	Intronic	1
ENSG00000284266	MIR4534	POLR2F	Intronic	1
ENSG00000266594	MIR4766	SLC25A17	Intronic	1
ENSG00000284015	MIR1281	EP300	Exonic	1
ENSG00000274552	MIR6889	RANGAP1	Intronic	1
ENSG00000207932	MIR33A	SREBF2	Intronic	1
ENSG00000283829	MIR378I	TNFRSF13C	Exonic	1
ENSG00000221598	MIR1249	KIAA0930	Intronic	1
ENSG00000264160	MIR4762	ATXN10	Intronic	1
ENSG00000266533	MIR3619	MIRLET7BHG	Intronic	1
ENSG00000283990	MIRLET7A3	MIRLET7BHG	Exonic	1
ENSG00000284175	MIR4763	MIRLET7BHG	Exonic	1
ENSG00000284520	MIRLET7B	MIRLET7BHG	Exonic	1
ENSG00000266887	MIR4535	FAM19A5	Intronic	1
ENSG00000264139	MIR3667	C22orf34	Intronic	1
ENSG00000276753	MIR6821	PIM3	Intronic	1
ENSG00000284550	MIR8069-1	FP475955.1	SO	1
ENSG00000275950	MIR6724-1	FP671120.1	Intronic	1
ENSG00000275708	MIR3648-1	FP671120.1	Intronic	1
ENSG00000277437	MIR3687-1	FP671120.1	Intronic	1
ENSG00000277379	MIR6724-3	FP236383.1	Intronic	1
ENSG00000266211	MIR3156-3	ANKRD30BP1	Intronic	1
ENSG00000207638	MIR99A	MIR99AHG	Intronic	1
ENSG00000199030	MIRLET7C	MIR99AHG	Intronic	1
ENSG00000207863	MIR125B2	MIR99AHG	Intronic	1
ENSG00000265841	MIR548X	MIR548XHG	Intronic	1
ENSG00000275469	MIR6130	AP001116.1	Intronic	1
ENSG00000283904	MIR155	MIR155HG	Exonic	1
ENSG00000284448	MIR6501	SON	Exonic	1
ENSG00000275523	MIR6508	WRB-SH3BGR|SH3BGR	Intronic|Intronic	2
ENSG00000263973	MIR4760	DSCAM	Intronic	1
ENSG00000275166	MIR6814	RIPK4	Intronic	1
ENSG00000278433	MIR6070	HSF2BP	Intronic	1
ENSG00000275167	MIR6815	COL18A1	Intronic	1

## Sheet: Intergenic_miRNAs
miR_gene_id	miR_name
ENSG00000207730	MIR200B
ENSG00000207607	MIR200A
ENSG00000198976	MIR429
ENSG00000264341	MIR4417
ENSG00000264101	MIR4689
ENSG00000265392	MIR4252
ENSG00000283789	MIR7846
ENSG00000263811	MIR3675
ENSG00000266564	MIR4418
ENSG00000276835	MIR6127
ENSG00000264014	MIR4253
ENSG00000264926	MIR378F
ENSG00000264371	MIR4425
ENSG00000207941	MIR552
ENSG00000264698	MIR4255
ENSG00000265538	MIR4421
ENSG00000275816	MIR6500
ENSG00000266150	MIR4711
ENSG00000283690	MIR3116-2
ENSG00000275836	MIR6068
ENSG00000265996	MIR3671
ENSG00000199135	MIR101-1
ENSG00000266110	MIR4423
ENSG00000211575	MIR760
ENSG00000275455	MIR7852
ENSG00000283296	MIR4256
ENSG00000211543	MIR320B1
ENSG00000278596	MIR6077
ENSG00000274940	MIR8083
ENSG00000283340	MIR3119-1
ENSG00000221390	MIR1295A
ENSG00000266417	MIR4424
ENSG00000207590	MIR215
ENSG00000207624	MIR194-1
ENSG00000266174	MIR4666A
ENSG00000265831	MIR3123
ENSG00000264500	MIR3124
ENSG00000283394	MIR7515
ENSG00000265418	MIR4261
ENSG00000264010	MIR4429
ENSG00000265172	MIR4262
ENSG00000266738	MIR4757
ENSG00000283591	MIR4430
ENSG00000265301	MIR548AD
ENSG00000264975	MIR4431
ENSG00000283222	MIR4433A
ENSG00000264525	MIR4778
ENSG00000221238	MIR1285-2
ENSG00000263909	MIR5000
ENSG00000266436	MIR4264
ENSG00000276917	MIR8080
ENSG00000278783	MIR6071
ENSG00000265003	MIR4780
ENSG00000265510	MIR4436A
ENSG00000264857	MIR5696
ENSG00000264934	MIR4265
ENSG00000265965	MIR4266
ENSG00000265682	MIR4267
ENSG00000221055	MIR1302-3
ENSG00000264075	MIR4783
ENSG00000283569	MIR4773-2
ENSG00000283203	MIR1246
ENSG00000266705	MIR4437
ENSG00000266808	MIR548AE1
ENSG00000283238	MIR1245B
ENSG00000283469	MIR3130-1
ENSG00000277590	MIR7845
ENSG00000266354	MIR4776-1
ENSG00000283639	MIR9500
ENSG00000198973	MIR375
ENSG00000265252	MIR3132
ENSG00000266518	MIR4268
ENSG00000263363	MIR5702
ENSG00000284092	MIR5703
ENSG00000222246	MIR1471
ENSG00000265215	MIR4269
ENSG00000265180	MIR4790
ENSG00000264534	MIR378B
ENSG00000207815	MIR563
ENSG00000271898	MIR4791
ENSG00000265028	MIR4792
ENSG00000283971	MIR4442
ENSG00000265376	MIR466
ENSG00000276147	MIR548AY
ENSG00000207954	MIR138-1
ENSG00000265483	MIR4443
ENSG00000264633	MIR4271
ENSG00000272543	MIR4787
ENSG00000283298	MIR4272
ENSG00000266780	MIR4444-2
ENSG00000266396	MIR4273
ENSG00000265193	MIR3923
ENSG00000264119	MIR4795
ENSG00000278103	MIR8060
ENSG00000265328	MIR548AB
ENSG00000265956	MIR4445
ENSG00000221737	MIR548I1
ENSG00000264330	MIR5186
ENSG00000221251	MIR1263
ENSG00000283333	MIR7977
ENSG00000221275	MIR548I2
ENSG00000207716	MIR572
ENSG00000266240	MIR5091
ENSG00000283275	MIR4275
ENSG00000283207	MIR1255B1
ENSG00000264319	MIR4801
ENSG00000277388	MIR8053
ENSG00000265829	MIR548AG1
ENSG00000221563	MIR1269A
ENSG00000263981	MIR5705
ENSG00000215961	MIR297
ENSG00000283550	MIR2054
ENSG00000278438	MIR7849
ENSG00000221369	MIR548G
ENSG00000264105	MIR3688-1
ENSG00000283468	MIR4454
ENSG00000278502	MIR6082
ENSG00000265846	MIR4276
ENSG00000263458	MIR4455
ENSG00000264233	MIR4456
ENSG00000263670	MIR4457
ENSG00000263746	MIR4277
ENSG00000283420	MIR4278
ENSG00000277073	MIR6131
ENSG00000266243	MIR4279
ENSG00000265699	MIR548AE2
ENSG00000283359	MIR3977
ENSG00000265919	MIR4280
ENSG00000264342	MIR3660
ENSG00000283498	MIR1244-2
ENSG00000265691	MIR4460
ENSG00000266751	MIR3661
ENSG00000265924	MIR5692C1
ENSG00000264760	MIR3141
ENSG00000221552	MIR1303
ENSG00000263361	MIR378H
ENSG00000283612	MIR103B1
ENSG00000264249	MIR3912
ENSG00000274994	MIR8056
ENSG00000277912	MIR8089
ENSG00000264732	MIR4638
ENSG00000275859	MIR6720
ENSG00000266750	MIR4645
ENSG00000283616	MIR5683
ENSG00000265565	MIR3143
ENSG00000263649	MIR3135B
ENSG00000199036	MIR219A1
ENSG00000266509	MIR3934
ENSG00000221697	MIR1275
ENSG00000263894	MIR3925
ENSG00000263926	MIR4462
ENSG00000207604	MIR206
ENSG00000199080	MIR133B
ENSG00000264056	MIR5685
ENSG00000266180	MIR4282
ENSG00000263533	MIR4463
ENSG00000266760	MIR4464
ENSG00000263734	MIR4643
ENSG00000265226	MIR548AI
ENSG00000207577	MIR587
ENSG00000265725	MIR3144
ENSG00000207632	MIR588
ENSG00000266807	MIR548H5
ENSG00000265669	MIR548AJ1
ENSG00000207689	MIR548A2
ENSG00000263514	MIR3668
ENSG00000264390	MIR4465
ENSG00000221456	MIR1202
ENSG00000271899	MIR4466
ENSG00000265558	MIR3918
ENSG00000264474	MIR4656
ENSG00000266287	MIR3683
ENSG00000221393	MIR1302-6
ENSG00000199085	MIR148A
ENSG00000283237	MIR550B1
ENSG00000264426	MIR4283-1
ENSG00000265214	MIR4283-2
ENSG00000266525	MIR4650-1
ENSG00000265878	MIR3914-1
ENSG00000264494	MIR4650-2
ENSG00000265724	MIR4284
ENSG00000266318	MIR5692A1
ENSG00000221510	MIR548O
ENSG00000207705	MIR129-1
ENSG00000207990	MIR182
ENSG00000199158	MIR96
ENSG00000207691	MIR183
ENSG00000221442	MIR548F4
ENSG00000265598	MIR5707
ENSG00000277120	MIR6089
ENSG00000265284	MIR4770
ENSG00000264268	MIR4767
ENSG00000277569	MIR6134
ENSG00000221466	MIR548AJ2
ENSG00000263730	MIR3937
ENSG00000263972	MIR1587
ENSG00000263858	MIR4769
ENSG00000275335	MIR8088
ENSG00000283334	MIR4536-1
ENSG00000266328	MIR4536-2
ENSG00000283534	MIR374C
ENSG00000283622	MIR4328
ENSG00000221494	MIR548I4
ENSG00000283435	MIR1321
ENSG00000221187	MIR548M
ENSG00000275110	MIR6087
ENSG00000265456	MIR3672
ENSG00000216001	MIR450B
ENSG00000199132	MIR450A1
ENSG00000207755	MIR450A2
ENSG00000207784	MIR542
ENSG00000284231	MIR424
ENSG00000221081	MIR320D2
ENSG00000252219	MIR892C
ENSG00000216075	MIR890
ENSG00000216005	MIR888
ENSG00000215943	MIR892A
ENSG00000216098	MIR892B
ENSG00000216064	MIR891B
ENSG00000216056	MIR891A
ENSG00000216171	MIR513C
ENSG00000207871	MIR513B
ENSG00000207873	MIR513A1
ENSG00000207984	MIR513A2
ENSG00000207731	MIR506
ENSG00000207969	MIR507
ENSG00000207589	MIR508
ENSG00000252583	MIR514B
ENSG00000212013	MIR509-2
ENSG00000212014	MIR509-3
ENSG00000208000	MIR509-1
ENSG00000207641	MIR510
ENSG00000207868	MIR514A1
ENSG00000207866	MIR514A2
ENSG00000207867	MIR514A3
ENSG00000252454	MIR2114
ENSG00000265789	MIR4330
ENSG00000283694	MIR3202-2
ENSG00000284286	MIR718
ENSG00000221190	MIR1184-2
ENSG00000221603	MIR1184-3
ENSG00000283386	MIR4659B
ENSG00000221305	MIR548I3
ENSG00000263762	MIR4286
ENSG00000264512	MIR5692A2
ENSG00000283523	MIR3926-2
ENSG00000208037	MIR320A
ENSG00000221616	MIR548H4
ENSG00000265075	MIR3622B
ENSG00000265251	MIR4288
ENSG00000264788	MIR3148
ENSG00000283450	MIR486-2
ENSG00000264408	MIR4470
ENSG00000266502	MIR5681A
ENSG00000283505	MIR5681B
ENSG00000266712	MIR3149
ENSG00000265588	MIR5708
ENSG00000277063	MIR8084
ENSG00000207804	MIR599
ENSG00000216069	MIR875
ENSG00000265599	MIR4471
ENSG00000266756	MIR5680
ENSG00000208032	MIR548A3
ENSG00000238399	MIR2053
ENSG00000276479	MIR548AZ
ENSG00000266324	MIR4663
ENSG00000207704	MIR548AA1
ENSG00000283609	MIR4662A
ENSG00000221261	MIR1208
ENSG00000207582	MIR30B
ENSG00000199153	MIR30D
ENSG00000221768	MIR1302-7
ENSG00000265247	MIR4472-1
ENSG00000263575	MIR4665
ENSG00000215966	MIR876
ENSG00000215939	MIR873
ENSG00000266255	MIR4475
ENSG00000275377	MIR1299
ENSG00000276029	MIR4477A
ENSG00000266017	MIR4477B
ENSG00000265873	MIR4289
ENSG00000266855	MIR3910-1
ENSG00000265347	MIR4291
ENSG00000207617	MIR3074
ENSG00000221269	MIR1302-8
ENSG00000263861	MIR3927
ENSG00000207814	MIR147A
ENSG00000266583	MIR4478
ENSG00000207581	MIR199B
ENSG00000264823	MIR3154
ENSG00000283335	MIR219B
ENSG00000264744	MIR3689C
ENSG00000265872	MIR3689A
ENSG00000265848	MIR3689D1
ENSG00000264163	MIR3689B
ENSG00000264136	MIR3689D2
ENSG00000266827	MIR3689E
ENSG00000266514	MIR3689F
ENSG00000265181	MIR4674
ENSG00000264493	MIR4298
ENSG00000265258	MIR4686
ENSG00000221703	MIR302E
ENSG00000266645	MIR4299
ENSG00000278529	MIR8070
ENSG00000264603	MIR3159
ENSG00000264309	MIR4694
ENSG00000275868	MIR8054
ENSG00000278483	MIR8087
ENSG00000207874	MIR610
ENSG00000273912	MIR8068
ENSG00000276639	MIR7154
ENSG00000283497	MIR3160-2
ENSG00000264583	MIR4487
ENSG00000274770	MIR6128
ENSG00000266006	MIR4488
ENSG00000278359	MIR7155
ENSG00000265064	MIR4692
ENSG00000266581	MIR3166
ENSG00000266703	MIR4490
ENSG00000221586	MIR1261
ENSG00000266192	MIR1260B
ENSG00000264200	MIR4693
ENSG00000280773	MIR7641-1
ENSG00000264032	MIR4491
ENSG00000207811	MIR34B
ENSG00000207562	MIR34C
ENSG00000264211	MIR4492
ENSG00000265357	MIR4493
ENSG00000276176	MIR6090
ENSG00000274999	MIR8052
ENSG00000278069	MIR6072
ENSG00000274809	MIR6078
ENSG00000283634	MIR3155B
ENSG00000265653	MIR548AK
ENSG00000283699	MIR4481
ENSG00000221331	MIR548Q
ENSG00000221371	MIR1265
ENSG00000265372	MIR4675
ENSG00000264574	MIR1254-2
ENSG00000263795	MIR5100
ENSG00000264747	MIR3924
ENSG00000283672	MIR4678
ENSG00000265375	MIR4679-2
ENSG00000283664	MIR4679-1
ENSG00000207976	MIR607
ENSG00000283558	MIR3158-2
ENSG00000202569	MIR146B
ENSG00000266852	MIR4482
ENSG00000283688	MIR6715B
ENSG00000283656	MIR4483
ENSG00000265370	MIR4682
ENSG00000265092	MIR4484
ENSG00000264803	MIR378C
ENSG00000266043	MIR3649
ENSG00000283665	MIR3974
ENSG00000216192	MIR920
ENSG00000283603	MIR4302
ENSG00000264906	MIR4494
ENSG00000266016	MIR548Z
ENSG00000276878	MIR6074
ENSG00000283476	MIR1279
ENSG00000264405	MIR3913-1
ENSG00000283677	MIR3913-2
ENSG00000266099	MIR5700
ENSG00000199172	MIR331
ENSG00000265917	MIR3685
ENSG00000265861	MIR4495
ENSG00000263890	MIR4303
ENSG00000221476	MIR1827
ENSG00000263510	MIR4497
ENSG00000283507	MIR1302-1
ENSG00000264037	MIR4472-2
ENSG00000284425	MIR8072
ENSG00000266655	MIR3908
ENSG00000265345	MIR5188
ENSG00000265061	MIR4419B
ENSG00000264171	MIR4305
ENSG00000211491	MIR320D1
ENSG00000207652	MIR621
ENSG00000264226	MIR3168
ENSG00000276319	MIR8079
ENSG00000266072	MIR5693
ENSG00000266611	MIR4703
ENSG00000211579	MIR759
ENSG00000283126	MIR1297
ENSG00000264387	MIR5007
ENSG00000266663	MIR3169
ENSG00000263581	MIR548X2
ENSG00000263561	MIR4704
ENSG00000266325	MIR3665
ENSG00000265450	MIR4502
ENSG00000263945	MIR548Y
ENSG00000278038	MIR6076
ENSG00000266431	MIR5580
ENSG00000266740	MIR4708
ENSG00000265993	MIR5694
ENSG00000264741	MIR4505
ENSG00000221754	MIR1260A
ENSG00000265154	MIR151B
ENSG00000198984	MIR345
ENSG00000283279	MIR376C
ENSG00000283561	MIR376A2
ENSG00000207934	MIR654
ENSG00000283556	MIR376B
ENSG00000283588	MIR376A1
ENSG00000215957	MIR300
ENSG00000221525	MIR1185-1
ENSG00000221614	MIR1185-2
ENSG00000207742	MIR487A
ENSG00000283170	MIR382
ENSG00000207993	MIR134
ENSG00000276352	MIR668
ENSG00000208027	MIR485
ENSG00000208004	MIR323B
ENSG00000207978	MIR154
ENSG00000207961	MIR496
ENSG00000199015	MIR377
ENSG00000266015	MIR4309
ENSG00000207568	MIR203A
ENSG00000283165	MIR203B
ENSG00000265291	MIR4710
ENSG00000274172	MIR8071-1
ENSG00000277030	MIR8071-2
ENSG00000265612	MIR4539
ENSG00000264024	MIR4507
ENSG00000263413	MIR4538
ENSG00000264781	MIR4537
ENSG00000265929	MIR5195
ENSG00000265322	MIR3118-2
ENSG00000266545	MIR5701-1
ENSG00000277243	MIR3118-3
ENSG00000277841	MIR5701-2
ENSG00000265793	MIR3118-4
ENSG00000264902	MIR5701-3
ENSG00000221641	MIR1268A
ENSG00000276941	MIR4509-1
ENSG00000265673	MIR4508
ENSG00000266039	MIR4509-2
ENSG00000263964	MIR4509-3
ENSG00000265098	MIR4510
ENSG00000264210	MIR4716
ENSG00000278098	MIR7973-1
ENSG00000277919	MIR8067
ENSG00000275451	MIR6085
ENSG00000199156	MIR422A
ENSG00000263512	MIR4311
ENSG00000264386	MIR4513
ENSG00000284343	MIR631
ENSG00000266449	MIR3713
ENSG00000207695	MIR184
ENSG00000208003	MIR549A
ENSG00000265855	MIR4514
ENSG00000264406	MIR548AP
ENSG00000221630	MIR1179
ENSG00000207703	MIR7-2
ENSG00000283484	MIR3529
ENSG00000207579	MIR662
ENSG00000265867	MIR4516
ENSG00000264397	MIR3180-5
ENSG00000264004	MIR4717
ENSG00000266232	MIR3178
ENSG00000273776	MIR6126
ENSG00000221801	MIR548H2
ENSG00000264733	MIR4718
ENSG00000263918	MIR3670-1
ENSG00000265537	MIR3180-1
ENSG00000238728	MIR1972-1
ENSG00000264115	MIR3180-4
ENSG00000257381	MIR3179-2
ENSG00000264722	MIR3670-2
ENSG00000265373	MIR3180-2
ENSG00000266291	MIR3180-3
ENSG00000265776	MIR3670-3
ENSG00000266454	MIR3179-3
ENSG00000266758	MIR3680-2
ENSG00000207649	MIR138-2
ENSG00000207948	MIR328
ENSG00000223109	MIR1538
ENSG00000239118	MIR1972-2
ENSG00000266307	MIR5093
ENSG00000267200	MIR132
ENSG00000267195	MIR212
ENSG00000264468	MIR4520-1
ENSG00000199053	MIR324
ENSG00000264005	MIR4314
ENSG00000283160	MIR4521
ENSG00000265503	MIR1269B
ENSG00000263583	MIR4522
ENSG00000283364	MIR451B
ENSG00000207614	MIR193A
ENSG00000275238	MIR4734
ENSG00000274054	MIR4727
ENSG00000263602	MIR3185
ENSG00000273500	MIR6129
ENSG00000278672	MIR8059
ENSG00000264399	MIR4736
ENSG00000264049	MIR4737
ENSG00000207552	MIR633
ENSG00000265031	MIR1273E
ENSG00000278581	MIR6080
ENSG00000263690	MIR548D2
ENSG00000265331	MIR4524B
ENSG00000284186	MIR3615
ENSG00000264511	MIR3678
ENSG00000264060	MIR4316
ENSG00000266665	MIR4739
ENSG00000211563	MIR3065
ENSG00000266392	MIR4740
ENSG00000266189	MIR3186
ENSG00000277521	MIR8078
ENSG00000283492	MIR7153
ENSG00000221493	MIR320C1
ENSG00000212051	MIR320C2
ENSG00000283218	MIR302F
ENSG00000207797	MIR187
ENSG00000265641	MIR3929
ENSG00000266148	MIR5583-1
ENSG00000265957	MIR4319
ENSG00000207778	MIR3591
ENSG00000263354	MIR5011
ENSG00000283320	MIR103B2
ENSG00000278159	MIR8062
ENSG00000264395	MIR3193
ENSG00000283441	MIR499B
ENSG00000266071	MIR3617
ENSG00000208018	MIR645
ENSG00000266666	MIR4325
ENSG00000263453	MIR4532
ENSG00000216031	MIR298
ENSG00000265617	MIR548AG2
ENSG00000265306	MIR3195
ENSG00000207598	MIR124-3
ENSG00000263414	MIR3187
ENSG00000277904	MIR7850
ENSG00000266437	MIR4746
ENSG00000264266	MIR4322
ENSG00000207752	MIR199A1
ENSG00000263800	MIR5684
ENSG00000266721	MIR5695
ENSG00000269782	MIR1470
ENSG00000267959	MIR3188
ENSG00000266559	MIR4530
ENSG00000275726	MIR6088
ENSG00000283212	MIR642B
ENSG00000265134	MIR3190
ENSG00000207782	MIR150
ENSG00000278617	MIR8074
ENSG00000207645	MIR512-1
ENSG00000207644	MIR512-2
ENSG00000221017	MIR1323
ENSG00000207869	MIR498
ENSG00000207599	MIR520E
ENSG00000207616	MIR515-1
ENSG00000207810	MIR519E
ENSG00000283540	MIR520F
ENSG00000207615	MIR515-2
ENSG00000207788	MIR519C
ENSG00000221421	MIR1283-1
ENSG00000207594	MIR520A
ENSG00000207580	MIR526B
ENSG00000207825	MIR519B
ENSG00000207711	MIR525
ENSG00000283455	MIR523
ENSG00000207706	MIR518F
ENSG00000207722	MIR520B
ENSG00000207862	MIR518B
ENSG00000207629	MIR526A1
ENSG00000207738	MIR520C
ENSG00000283490	MIR518C
ENSG00000283289	MIR524
ENSG00000207734	MIR517A
ENSG00000207981	MIR519D
ENSG00000207549	MIR521-2
ENSG00000207735	MIR520D
ENSG00000207837	MIR517B
ENSG00000207799	MIR520G
ENSG00000207925	MIR516B2
ENSG00000211532	MIR526A2
ENSG00000207987	MIR518E
ENSG00000207803	MIR518A1
ENSG00000283330	MIR518D
ENSG00000207946	MIR516B1
ENSG00000207699	MIR518A2
ENSG00000207838	MIR517C
ENSG00000207861	MIR520H
ENSG00000207634	MIR521-1
ENSG00000283685	MIR522
ENSG00000207992	MIR519A1
ENSG00000207979	MIR527
ENSG00000207767	MIR516A1
ENSG00000221548	MIR1283-2
ENSG00000207620	MIR516A2
ENSG00000199031	MIR371A
ENSG00000199095	MIR372
ENSG00000199143	MIR373
ENSG00000264703	MIR4752
ENSG00000275863	MIR7975
ENSG00000266640	MIR4754
ENSG00000207575	MIR649
ENSG00000264824	MIR5571
ENSG00000264073	MIR3199-1
ENSG00000276162	MIR5739
ENSG00000264141	MIR3928
ENSG00000274280	MIR6069
ENSG00000266508	MIR3201
ENSG00000274060	MIR6724-2
ENSG00000275692	MIR6724-4
ENSG00000264462	MIR3648-2
ENSG00000264063	MIR3687-2
ENSG00000266299	MIR3118-1
ENSG00000278618	MIR8069-2
ENSG00000266133	MIR4759
ENSG00000265007	MIR4327
ENSG00000211590	MIR802
ENSG00000263681	MIR3197
ENSG00000264580	MIR5692B

## Sheet: multi_hosted_miRNAs
miR_gene_id	miR_hosted	MIRHG_name	hosted_status	hosted_times
ENSG00000207571	MIR615	AC012531.2|HOXC4|HOXC5	Intronic|Intronic|Intronic	3
ENSG00000221520	MIR1285-1	AC000120.3|KRIT1|AC000120.1	Intronic|Intronic|Intronic	3
ENSG00000207805	MIR483	IGF2|IGF2|INS-IGF2	Intronic|Intronic|Intronic	3
ENSG00000284038	MIR10A	HOXB3|HOXB4|AC103702.1	Intronic|Exonic|Exonic	3
ENSG00000265606	MIR4695	AL080251.1|ALDH4A1	Intronic|Intronic	2
ENSG00000221662	MIR1290	AL080251.1|ALDH4A1	Intronic|Intronic	2
ENSG00000283477	MIR6079	AL451062.3|ST3GAL3	Intronic|Exonic	2
ENSG00000207606	MIR554	TUFT1|AL365436.2	Intronic|Intronic	2
ENSG00000276584	MIR6737	SLC39A1|AL358472.7	Intronic|Intronic	2
ENSG00000215952	MIR921	FAM78B|AL596087.2	Intronic|Intronic	2
ENSG00000284519	MIR6741	AL117348.2|PYCR2	Intronic|Exonic	2
ENSG00000265507	MIR4435-1	CYTOR|AC133644.3	Exonic|Intronic	2
ENSG00000263881	MIR4436B2	AC140479.5|AC140479.6	Intronic|Intronic	2
ENSG00000278418	MIR6512	NFE2L2|AC019080.1	Intronic|Intronic	2
ENSG00000284498	MIR564	KIF15|TMEM42	Intronic|Exonic	2
ENSG00000275789	MIR8064	TMEM110-MUSTN1|STIMATE	Intronic|Intronic	2
ENSG00000221264	MIR1284	FOXP1|AC097634.4	Intronic|Intronic	2
ENSG00000275670	MIR8076	CFAP44|AC112128.1	Intronic|Intronic	2
ENSG00000284134	MIR568	ZBTB20|AC093010.3	Exonic|Exonic	2
ENSG00000283474	MIR6828	CLDN11|AC026316.5	Intronic|Intronic	2
ENSG00000221227	MIR1305	TENM3|AC108142.1	Intronic|Intronic	2
ENSG00000207578	MIR583	AC104123.1|MIR583HG	Intronic|Intronic	2
ENSG00000283717	MIR6831	APBB3|AC116353.4	Exonic|Intronic	2
ENSG00000266776	MIR4646	ABHD16A|AL662899.1	Intronic|Intronic	2
ENSG00000199094	MIR30C2	AL136164.2|LINC00472	Intronic|Intronic	2
ENSG00000207827	MIR30A	AL136164.2|LINC00472	Intronic|Intronic	2
ENSG00000265828	MIR3939	Z94721.1|Z94721.3	Intronic|Intronic	2
ENSG00000283745	MIR196B	HOXA9|AC004080.3	Exonic|Intronic	2
ENSG00000264069	MIR3943	HECW1|HECW1-IT1	Intronic|Intronic	2
ENSG00000284012	MIR6840	STAG3L5P-PVRIG2P-PILRB|PILRB	Intronic|Exonic	2
ENSG00000283923	MIR6132	ST7|ST7-OT4	Exonic|Intronic	2
ENSG00000283797	MIR29B1	AC016831.6|LINC-PINT	Intronic|Exonic	2
ENSG00000284135	MIR3654	CHCHD3|AC008038.1	Intronic|Exonic	2
ENSG00000284450	MIR664B	DKC1|SNORA36A	Exonic|Exonic	2
ENSG00000283858	MIR3674	CLN8|KBTBD11-OT1	Exonic|Intronic	2
ENSG00000283210	MIR1322	PINX1|PINX1	Intronic|Intronic	2
ENSG00000284147	MIR3150B	MIR3150BHG|AC068189.1	SO|Intronic	2
ENSG00000283941	MIR600	MIR600HG|STRBP	Exonic|Intronic	2
ENSG00000283874	MIR3911	AL162426.1|PTRH1	Exonic|Exonic	2
ENSG00000263979	MIR4672	AK1|AL157935.2	Intronic|Intronic	2
ENSG00000278756	MIR6722	AL355987.1|LCN6	Intronic|Intronic	2
ENSG00000263697	MIR3621	LRRC26|AL929554.1	Intronic|Intronic	2
ENSG00000199077	MIR129-2	AC068205.1|AC068205.2	Intronic|Intronic	2
ENSG00000276102	MIR6747	EEF1G|AP002990.1	Intronic|Intronic	2
ENSG00000278851	MIR6879	ARL2|ARL2-SNX15	Intronic|Intronic	2
ENSG00000284277	MIR7162	MTPAP|GOLGA2P6	SO|SO	2
ENSG00000263476	MIR3156-1	AL358394.2|ANKRD30BP3	Intronic|Intronic	2
ENSG00000207924	MIR196A2	AC012531.2|HOXC6	Intronic|Intronic	2
ENSG00000199122	MIR148B	AC078778.2|COPZ1	Intronic|Intronic	2
ENSG00000208028	MIR616	DDIT3|AC022506.1	Intronic|Intronic	2
ENSG00000252695	MIR2276	AL359736.1|SPATA13	Intronic|Intronic	2
ENSG00000263741	MIR548AS	GPC5|GPC5-IT1	Intronic|Intronic	2
ENSG00000284118	MIR4707	HAUS4|AL132780.3	Exonic|Intronic	2
ENSG00000265165	MIR4307	AL110292.1|MIR4307HG	Intronic|Intronic	2
ENSG00000266531	MIR4706	CHURC1-FNTB|FNTB	Intronic|Intronic	2
ENSG00000280494	MIR7641-2	FLVCR2|RNA5SP387	Intronic|Exonic	2
ENSG00000211574	MIR770	MEG3|AL117190.1	Exonic|Intronic	2
ENSG00000199005	MIR370	AL117190.1|MEG8	Intronic|Intronic	2
ENSG00000283891	MIR628	CCPG1|DNAAF4-CCPG1	SO|Intronic	2
ENSG00000263643	MIR4515	AC022558.2|AC024270.2	Intronic|Intronic	2
ENSG00000264966	MIR5094	AP3S2|C15orf38-AP3S2	Intronic|Intronic	2
ENSG00000264796	MIR5009	AP3S2|C15orf38-AP3S2	Intronic|Intronic	2
ENSG00000284324	MIR3175	AC013394.1|CHD2	Intronic|SO	2
ENSG00000275259	MIR6511A1	AC138932.1|NPIPA1	Intronic|Intronic	2
ENSG00000278265	MIR6770-1	AC138932.1|NPIPA1	Intronic|Intronic	2
ENSG00000278221	MIR6511A2	PKD1P1|PKD1P1	Intronic|Intronic	2
ENSG00000277698	MIR6770-2	PKD1P1|PKD1P1	Intronic|Intronic	2
ENSG00000273613	MIR6511A4	AC126755.7|AC126755.1	Intronic|Intronic	2
ENSG00000265005	MIR548W	HS3ST4|AC093516.1	Intronic|Intronic	2
ENSG00000284112	MIR195	AC040977.2|MIR497HG	Intronic|Exonic	2
ENSG00000284027	MIR497	AC040977.2|MIR497HG	Intronic|Exonic	2
ENSG00000284532	MIR4723	TMEM199|AC002094.1	Exonic|Intronic	2
ENSG00000284162	MIR4523	AC068025.2|TAOK1	Intronic|Exonic	2
ENSG00000284399	MIR3184	AC104984.2|AC104984.5	Intronic|Exonic	2
ENSG00000264999	MIR5089	GOSR2|AC005670.2	Intronic|Intronic	2
ENSG00000284250	MIR6516	SNHG20|SEC14L1	Exonic|Intronic	2
ENSG00000284436	MIR6869	AL136531.2|FKBP1A	Intronic|Exonic	2
ENSG00000274390	MIR6885	GTF2F1|AC011491.2	Intronic|Intronic	2
ENSG00000274713	MIR7974	AC008481.3|ZNF653	Intronic|Intronic	2
ENSG00000284065	MIR6887	AC020907.6|FXYD3	Intronic|Exonic	2
ENSG00000275523	MIR6508	WRB-SH3BGR|SH3BGR	Intronic|Intronic	2
