# Supplementary material
Source: HighWire-hosted journal article supplement (doi:10.1101/rna.075309.120)
Supplement: Supplementary_Table_5_MIRHG_annotation_and_DE-MIRHG.xlsx [file Supplementary_Table_5_MIRHG_annotation_and_DE-MIRHG.xlsx]

## Sheet: Complete_annotation
chromosome	start	end	width	strand	MIRHG_id	MIRHG_name	biotype	miR_hosted	miR_gene_id	miR_hosted_start	miR_hosted_end	MIR_encoded_status
1	14404	29570	15167	-	ENSG00000227232	WASH7P	unprocessed_pseudogene	MIR6859-1	ENSG00000278267	17369	17436	Intronic
1	29554	31109	1556	+	ENSG00000243485	MIR1302-2HG	lincRNA	MIR1302-2	ENSG00000284332	30366	30503	Exonic
1	185217	195411	10195	-	ENSG00000279457	FO538757.1	unprocessed_pseudogene	MIR6859-2	ENSG00000273874	187891	187958	Intronic
1	586071	827796	241726	-	ENSG00000230021	AL669831.3	transcribed_processed_pseudogene	MIR6723	ENSG00000278791	632325	632413	Intronic
1	1292376	1309609	17234	-	ENSG00000131584	ACAP3	protein_coding	MIR6726	ENSG00000278073	1296110	1296170	Intronic
1	1311585	1324691	13107	-	ENSG00000127054	INTS11	protein_coding	MIR6727	ENSG00000283712	1312502	1312566	Exonic
1	1335276	1349350	14075	-	ENSG00000107404	DVL1	protein_coding	MIR6808	ENSG00000284372	1339650	1339708	Exonic
1	3069168	3438621	369454	+	ENSG00000142611	PRDM16	protein_coding	MIR4251	ENSG00000283572	3127975	3128035	Intronic
1	3489920	3611495	121576	-	ENSG00000162591	MEGF6	protein_coding	MIR551A	ENSG00000207776	3560695	3560790	Intronic
1	8861000	8879250	18251	-	ENSG00000074800	ENO1	protein_coding	MIR6728	ENSG00000274258	8866502	8866590	Intronic
1	9148011	9198906	50896	-	ENSG00000228526	MIR34AHG	lincRNA	MIR34A	ENSG00000284357	9151668	9151777	Exonic
1	9943428	9985501	42074	+	ENSG00000173614	NMNAT1	protein_coding	MIR5697	ENSG00000265521	9967381	9967458	Intronic
1	10210805	10381603	170799	+	ENSG00000054523	KIF1B	protein_coding	MIR1273D	ENSG00000264881	10227718	10227803	Intronic
1	12019466	12032045	12580	+	ENSG00000116691	MIIP	protein_coding	MIR6729	ENSG00000276869	12029158	12029222	Intronic
1	12167003	12209228	42226	+	ENSG00000028137	TNFRSF1B	protein_coding	MIR4632	ENSG00000263676	12191713	12191773	Intronic
1	12567910	12617731	49822	-	ENSG00000162496	DHRS3	protein_coding	MIR6730	ENSG00000276830	12578957	12579023	Intronic
1	17249098	17284233	35136	+	ENSG00000142619	PADI3	protein_coding	MIR3972	ENSG00000266634	17277889	17277975	Intronic
1	18849273	18921121	71849	-	ENSG00000255275	AL080251.1	protein_coding	MIR4695	ENSG00000265606	18883202	18883275	Intronic
1	18871430	18902781	31352	-	ENSG00000159423	ALDH4A1	protein_coding	MIR4695	ENSG00000265606	18883202	18883275	Intronic
1	18849273	18921121	71849	-	ENSG00000255275	AL080251.1	protein_coding	MIR1290	ENSG00000221662	18897071	18897148	Intronic
1	18871430	18902781	31352	-	ENSG00000159423	ALDH4A1	protein_coding	MIR1290	ENSG00000221662	18897071	18897148	Intronic
1	20633455	20651511	18057	+	ENSG00000158828	PINK1	protein_coding	MIR6084	ENSG00000284005	20633679	20633788	Exonic
1	20806292	21176888	370597	-	ENSG00000075151	EIF4G3	protein_coding	MIR1256	ENSG00000221808	20988314	20988432	Intronic
1	22710839	22921500	210662	+	ENSG00000133216	EPHB2	protein_coding	MIR4684	ENSG00000265422	22719517	22719598	Intronic
1	23019443	23083689	64247	+	ENSG00000004487	KDM1A	protein_coding	MIR3115	ENSG00000263793	23044305	23044372	Intronic
1	23020147	23088058	67912	-	ENSG00000240553	AL031428.1	antisense	MIR4419A	ENSG00000266802	23057858	23057934	Intronic
1	24899511	24965121	65611	-	ENSG00000020633	RUNX3	protein_coding	MIR6731	ENSG00000278034	24919345	24919416	Intronic
1	25884181	25906991	22811	-	ENSG00000117632	STMN1	protein_coding	MIR3917	ENSG00000283938	25906362	25906454	SO
1	26529761	26575030	45270	+	ENSG00000117676	RPS6KA1	protein_coding	MIR1976	ENSG00000238705	26554542	26554593	Intronic
1	30732469	30757820	25352	-	ENSG00000162511	LAPTM5	protein_coding	MIR4420	ENSG00000264773	30739156	30739232	Intronic
1	31727117	31764893	37777	-	ENSG00000121753	ADGRB2	protein_coding	MIR4254	ENSG00000266580	31758660	31758735	Intronic
1	32072031	32102866	30836	+	ENSG00000121775	TMEM39B	protein_coding	MIR5585	ENSG00000266203	32086949	32087007	Intronic
1	33323623	33431052	107430	-	ENSG00000134686	PHC2	protein_coding	MIR3605	ENSG00000284154	33332393	33332492	SO
1	37474552	37484379	9828	+	ENSG00000163874	ZC3H12A	protein_coding	MIR6732	ENSG00000283724	37480230	37480289	Exonic
1	37492575	37514774	22200	-	ENSG00000163875	MEAF6	protein_coding	MIR5581	ENSG00000263675	37500935	37500994	Intronic
1	38047314	38119025	71712	+	ENSG00000224592	AL139158.2	lincRNA	MIR3659	ENSG00000265596	38089231	38089329	Intronic
1	40691648	40771603	79956	+	ENSG00000066136	NFYC	protein_coding	MIR30E	ENSG00000198974	40754355	40754446	Intronic
1	40691648	40771603	79956	+	ENSG00000066136	NFYC	protein_coding	MIR30C1	ENSG00000207962	40757284	40757372	Intronic
1	43164175	43270936	106762	-	ENSG00000117395	EBNA1BP2	protein_coding	MIR6733	ENSG00000284410	43171652	43171712	Exonic
1	43363397	43368074	4678	-	ENSG00000066322	ELOVL1	protein_coding	MIR6734	ENSG00000283836	43364648	43364715	Exonic
1	43389882	43454247	64366	+	ENSG00000198198	SZT2	protein_coding	MIR6735	ENSG00000274975	43448539	43448611	Intronic
1	43650149	43931014	280866	+	ENSG00000284989	AL451062.3	protein_coding	MIR6079	ENSG00000283477	43838622	43838683	Intronic
1	43705824	43931165	225342	+	ENSG00000126091	ST3GAL3	protein_coding	MIR6079	ENSG00000283477	43838622	43838683	Exonic
1	44405194	44651724	246531	+	ENSG00000187147	RNF220	protein_coding	MIR5584	ENSG00000263381	44545493	44545552	Intronic
1	51789191	51878937	89747	-	ENSG00000078618	NRDC	protein_coding	MIR761	ENSG00000283899	51836344	51836402	SO
1	52927229	53051703	124475	+	ENSG00000116171	SCP2	protein_coding	MIR1273F	ENSG00000264834	52928674	52928772	Intronic
1	52927229	53051703	124475	+	ENSG00000116171	SCP2	protein_coding	MIR5095	ENSG00000266188	52934930	52935017	Intronic
1	52927229	53051703	124475	+	ENSG00000116171	SCP2	protein_coding	MIR1273G	ENSG00000265815	52940314	52940413	Intronic
1	54053584	54112519	58936	+	ENSG00000116205	TCEANC2	protein_coding	MIR4781	ENSG00000283749	54054079	54054154	SO
1	55217645	55324691	107047	+	ENSG00000231090	MIR4422HG	lincRNA	MIR4422	ENSG00000265822	55225641	55225723	Intronic
1	61742406	62178675	436270	+	ENSG00000132849	PATJ	protein_coding	MIR3116-1	ENSG00000263908	62078786	62078859	Intronic
1	64470792	64693058	222267	+	ENSG00000158966	CACHD1	protein_coding	MIR4794	ENSG00000264470	64579847	64579923	Intronic
1	66533383	66748299	214917	+	ENSG00000118473	SGIP1	protein_coding	MIR3117	ENSG00000264720	66628440	66628517	Intronic
1	68098473	68233120	134648	-	ENSG00000116729	WLS	protein_coding	MIR1262	ENSG00000221203	68183518	68183610	Intronic
1	71063291	71081297	18007	-	ENSG00000132485	ZRANB2	protein_coding	MIR186	ENSG00000207721	71067631	71067716	Intronic
1	76867441	77065711	198271	+	ENSG00000117069	ST6GALNAC5	protein_coding	MIR7156	ENSG00000276081	77060143	77060202	Intronic
1	86346824	86396342	49519	-	ENSG00000122417	ODF2L	protein_coding	MIR7856	ENSG00000278281	86357632	86357687	Intronic
1	94613814	94855426	241613	-	ENSG00000224081	SLC44A3-AS1	transcribed_processed_pseudogene	MIR378G	ENSG00000263526	94745860	94745900	Intronic
1	97933474	98049863	116390	-	ENSG00000225206	MIR137HG	lincRNA	MIR2682	ENSG00000284247	98045242	98045351	Exonic
1	97933474	98049863	116390	-	ENSG00000225206	MIR137HG	lincRNA	MIR137	ENSG00000284202	98046070	98046171	Exonic
1	100266207	100292769	26563	+	ENSG00000137996	RTCA	protein_coding	MIR553	ENSG00000207750	100281241	100281308	Intronic
1	109548611	109618321	69711	+	ENSG00000065135	GNAI3	protein_coding	MIR197	ENSG00000284443	109598893	109598967	Exonic
1	116514535	116571039	56505	-	ENSG00000116815	CD58	protein_coding	MIR548AC	ENSG00000264419	116560024	116560111	Intronic
1	117060303	117107453	47151	+	ENSG00000116830	TTF2	protein_coding	MIR942	ENSG00000215930	117094643	117094728	Intronic
1	145848522	145859836	11315	-	ENSG00000131788	PIAS3	protein_coding	MIR6736	ENSG00000278549	145850587	145850645	Intronic
1	148290889	148519604	228716	-	ENSG00000274020	LINC01138	processed_transcript	MIR5087	ENSG00000283676	148334479	148334554	Intronic
1	150487364	150507609	20246	+	ENSG00000143374	TARS2	protein_coding	MIR6878	ENSG00000283933	150492345	150492410	Exonic
1	150549369	150560937	11569	+	ENSG00000143382	ADAMTSL4	protein_coding	MIR4257	ENSG00000264553	150551929	150552014	Intronic
1	151540305	151583583	43279	+	ENSG00000143367	TUFT1	protein_coding	MIR554	ENSG00000207606	151545796	151545891	Intronic
1	151540516	151561855	21340	+	ENSG00000232536	AL365436.2	sense_intronic	MIR554	ENSG00000207606	151545796	151545891	Intronic
1	153959099	153968184	9086	-	ENSG00000143570	SLC39A1	protein_coding	MIR6737	ENSG00000276584	153962351	153962420	Intronic
1	153959151	153975887	16737	-	ENSG00000285779	AL358472.7	protein_coding	MIR6737	ENSG00000276584	153962351	153962420	Intronic
1	153992685	154155116	162432	-	ENSG00000143552	NUP210L	protein_coding	MIR5698	ENSG00000263987	154104521	154104592	Intronic
1	154155304	154194648	39345	-	ENSG00000143549	TPM3	protein_coding	MIR190B	ENSG00000215938	154193665	154193743	Intronic
1	154974653	154979249	4597	+	ENSG00000173207	CKS1B	protein_coding	MIR4258	ENSG00000264349	154975693	154975783	Intronic
1	155195004	155205495	10492	+	ENSG00000231064	AC234582.1	antisense	MIR92B	ENSG00000284586	155195177	155195272	Exonic
1	155335268	155562807	227540	-	ENSG00000116539	ASH1L	protein_coding	MIR555	ENSG00000283701	155346350	155346445	SO
1	155946851	156007070	60220	-	ENSG00000116584	ARHGEF2	protein_coding	MIR6738	ENSG00000277817	155951273	155951336	Intronic
1	156404250	156430701	26452	-	ENSG00000125462	C1orf61	protein_coding	MIR9-1	ENSG00000207933	156420341	156420429	Intronic
1	156934840	157045370	110531	-	ENSG00000132694	ARHGEF11	protein_coding	MIR765	ENSG00000211581	156936131	156936244	Intronic
1	159872364	159900163	27800	-	ENSG00000213085	CFAP45	protein_coding	MIR4259	ENSG00000266458	159899979	159900079	Intronic
1	161225939	161230744	4806	+	ENSG00000158882	TOMM40L	protein_coding	MIR5187	ENSG00000284035	161227186	161227261	SO
1	162069774	162370475	300702	+	ENSG00000198929	NOS1AP	protein_coding	MIR4654	ENSG00000266144	162157107	162157182	Intronic
1	162069774	162370475	300702	+	ENSG00000198929	NOS1AP	protein_coding	MIR556	ENSG00000207729	162342546	162342640	Intronic
1	165827531	165911618	84088	+	ENSG00000143179	UCK2	protein_coding	MIR3658	ENSG00000283936	165907921	165907976	Exonic
1	166057426	166166969	109544	-	ENSG00000188859	FAM78B	protein_coding	MIR921	ENSG00000215952	166154743	166154798	Intronic
1	166147782	166165095	17314	-	ENSG00000230898	AL596087.2	sense_intronic	MIR921	ENSG00000215952	166154743	166154798	Intronic
1	167935783	168075843	140061	+	ENSG00000143164	DCAF6	protein_coding	MIR1255B2	ENSG00000221545	167998660	167998726	Intronic
1	168317497	168376876	59380	+	ENSG00000227722	AL022100.1	transcribed_processed_pseudogene	MIR557	ENSG00000207974	168375524	168375621	Intronic
1	170146001	170167790	21790	+	ENSG00000203740	METTL11B	protein_coding	MIR3119-2	ENSG00000263390	170151378	170151462	Intronic
1	171090877	171117819	26943	+	ENSG00000007933	FMO3	protein_coding	MIR1295B	ENSG00000283598	171101739	171101798	Intronic
1	172138397	172144840	6444	-	ENSG00000230630	DNM3OS	antisense	MIR214	ENSG00000283844	172138798	172138907	Exonic
1	171841498	172418466	576969	+	ENSG00000197959	DNM3	protein_coding	MIR3120	ENSG00000283152	172138808	172138888	Intronic
1	172138397	172144840	6444	-	ENSG00000230630	DNM3OS	antisense	MIR199A2	ENSG00000208024	172144535	172144644	SO
1	176857302	177164973	307672	-	ENSG00000152092	ASTN1	protein_coding	MIR488	ENSG00000202609	177029363	177029445	Intronic
1	180269653	180502954	233302	-	ENSG00000230124	ACBD6	protein_coding	MIR3121	ENSG00000265435	180438314	180438390	Intronic
1	192716132	192716653	522	+	ENSG00000231767	AL136454.1	protein_coding	MIR4426	ENSG00000283795	192716328	192716390	Exonic
1	193121800	193254815	133016	+	ENSG00000134371	CDC73	protein_coding	MIR1278	ENSG00000221680	193136503	193136583	Intronic
1	196225779	196609225	383447	-	ENSG00000162687	KCNT2	protein_coding	MIR4735	ENSG00000265986	196582413	196582481	Intronic
1	198807493	198937429	129937	-	ENSG00000229989	MIR181A1HG	lincRNA	MIR181B1	ENSG00000207975	198858873	198858982	Intronic
1	198807493	198937429	129937	-	ENSG00000229989	MIR181A1HG	lincRNA	MIR181A1	ENSG00000207759	198859044	198859153	Intronic
1	201622885	201826969	204085	+	ENSG00000134369	NAV1	protein_coding	MIR5191	ENSG00000264802	201719508	201719627	Intronic
1	201622885	201826969	204085	+	ENSG00000134369	NAV1	protein_coding	MIR1231	ENSG00000221028	201808611	201808702	Intronic
1	201829141	201884294	55154	+	ENSG00000198700	IPO9	protein_coding	MIR6739	ENSG00000277681	201863373	201863447	Intronic
1	201982372	202006147	23776	+	ENSG00000176393	RNPEP	protein_coding	MIR6740	ENSG00000275207	202003124	202003236	Intronic
1	205381378	205457091	75714	-	ENSG00000186007	LEMD1	protein_coding	MIR135B	ENSG00000199059	205448302	205448398	Intronic
1	206470476	206496889	26414	+	ENSG00000263528	IKBKE	protein_coding	MIR6769B	ENSG00000278465	206474803	206474864	Intronic
1	207801518	207879096	77579	-	ENSG00000203709	MIR29B2CHG	lincRNA	MIR29C	ENSG00000284214	207801852	207801939	Exonic
1	207801518	207879096	77579	-	ENSG00000203709	MIR29B2CHG	lincRNA	MIR29B2	ENSG00000284203	207802443	207802523	Exonic
1	209428820	209432838	4019	+	ENSG00000230937	MIR205HG	processed_transcript	MIR205	ENSG00000284485	209432133	209432242	SO
1	209614870	209652466	37597	-	ENSG00000196878	LAMB3	protein_coding	MIR4260	ENSG00000283876	209623444	209623510	SO
1	212035553	212107400	71848	+	ENSG00000143476	DTL	protein_coding	MIR3122	ENSG00000264358	212077613	212077685	Intronic
1	220148293	220272454	124162	-	ENSG00000118873	RAB3GAP2	protein_coding	MIR664A	ENSG00000281696	220200538	220200619	Intronic
1	224227334	224330387	103054	-	ENSG00000143748	NVL	protein_coding	MIR320B2	ENSG00000221406	224257004	224257141	Intronic
1	224385143	224437033	51891	-	ENSG00000162923	WDR26	protein_coding	MIR4742	ENSG00000266618	224398227	224398311	Intronic
1	225886696	225924278	37583	-	ENSG00000255835	AL117348.2	protein_coding	MIR6741	ENSG00000284519	225922080	225922142	Intronic
1	225919877	225924340	4464	-	ENSG00000143811	PYCR2	protein_coding	MIR6741	ENSG00000284519	225922080	225922142	Exonic
1	227918656	227947898	29243	-	ENSG00000143816	WNT9A	protein_coding	MIR5008	ENSG00000264483	227941590	227941683	Intronic
1	228082660	228099212	16553	+	ENSG00000143761	ARF1	protein_coding	MIR3620	ENSG00000284163	228097263	228097341	Exonic
1	228393673	228406840	13168	-	ENSG00000154370	TRIM11	protein_coding	MIR6742	ENSG00000284311	228397048	228397109	Exonic
1	231018958	231040246	21289	-	ENSG00000182118	FAM89A	protein_coding	MIR1182	ENSG00000283799	231019828	231019924	Exonic
1	233614004	233672512	58509	+	ENSG00000135750	KCNK1	protein_coding	MIR4427	ENSG00000265744	233624152	233624219	Intronic
1	233904933	234324516	419584	+	ENSG00000183780	SLC35F3	protein_coding	MIR4671	ENSG00000264377	234306467	234306539	Intronic
1	235131634	235328219	196586	-	ENSG00000054267	ARID4B	protein_coding	MIR4753	ENSG00000263439	235190034	235190116	Intronic
1	235661041	235883640	222600	-	ENSG00000143669	LYST	protein_coding	MIR1537	ENSG00000222831	235853000	235853060	Intronic
1	237042205	237833988	791784	+	ENSG00000198626	RYR2	protein_coding	MIR4428	ENSG00000266262	237471119	237471191	Intronic
1	243256034	243500092	244059	+	ENSG00000054282	SDCCAG8	protein_coding	MIR4677	ENSG00000265201	243346176	243346255	Intronic
1	247189851	247210856	21006	-	ENSG00000227671	AL390728.4	transcribed_unprocessed_pseudogene	MIR3916	ENSG00000283881	247201967	247202060	Exonic
2	5932687	6001275	68589	+	ENSG00000232044	LINC01105	processed_transcript	MIR7158	ENSG00000276733	5974662	5974732	Intronic
2	11677595	11827409	149815	+	ENSG00000134324	LPIN1	protein_coding	MIR548S	ENSG00000265056	11767444	11767525	Intronic
2	11848622	12578348	729727	+	ENSG00000224184	MIR3681HG	lincRNA	MIR3681	ENSG00000264089	12199130	12199201	Intronic
2	12716889	12742734	25846	+	ENSG00000071575	TRIB2	protein_coding	MIR3125	ENSG00000264370	12737367	12737444	Intronic
2	25227855	25342590	114736	-	ENSG00000119772	DNMT3A	protein_coding	MIR1301	ENSG00000221445	25328640	25328721	Intronic
2	27889941	28338901	448961	+	ENSG00000158019	BABAM2	protein_coding	MIR4263	ENSG00000265321	27996367	27996449	Intronic
2	32357028	32618899	261872	+	ENSG00000115760	BIRC6	protein_coding	MIR558	ENSG00000207653	32532153	32532246	Intronic
2	32628032	32821051	193020	+	ENSG00000018699	TTC27	protein_coding	MIR4765	ENSG00000265057	32635255	32635331	Intronic
2	47345158	47387601	42444	+	ENSG00000119888	EPCAM	protein_coding	MIR559	ENSG00000207923	47377675	47377770	Intronic
2	48809340	49419013	609674	+	ENSG00000282890	AC009975.1	lincRNA	MIR548BA	ENSG00000212036	49059603	49059658	Intronic
2	49918505	51225575	1307071	-	ENSG00000179915	NRXN1	protein_coding	MIR8485	ENSG00000216191	50696172	50696262	Intronic
2	53670293	53860160	189868	-	ENSG00000270898	GPR75-ASB3	protein_coding	MIR3682	ENSG00000265452	53849122	53849205	Intronic
2	55963191	56047326	84136	-	ENSG00000226702	MIR217HG	lincRNA	MIR217	ENSG00000207548	55982967	55983076	Intronic
2	55963191	56047326	84136	-	ENSG00000226702	MIR217HG	lincRNA	MIR216A	ENSG00000207798	55988950	55989059	Intronic
2	55963191	56047326	84136	-	ENSG00000226702	MIR217HG	lincRNA	MIR216B	ENSG00000211520	56000714	56000795	Intronic
2	60336446	60439828	103383	-	ENSG00000228590	MIR4432HG	lincRNA	MIR4432	ENSG00000266078	60387362	60387445	Intronic
2	62196113	62224731	28619	+	ENSG00000170340	B3GNT2	protein_coding	MIR5192	ENSG00000266097	62205826	62205917	Intronic
2	64338067	64341647	3581	-	ENSG00000238201	AC114752.2	lincRNA	MIR4433B	ENSG00000264297	64340747	64340848	Intronic
2	64524305	64593005	68701	+	ENSG00000119844	AFTPH	protein_coding	MIR4434	ENSG00000283204	64525513	64525565	Intronic
2	69013178	69249327	236150	+	ENSG00000169604	ANTXR1	protein_coding	MIR3126	ENSG00000266649	69103682	69103755	Intronic
2	86143932	86195770	51839	-	ENSG00000132305	IMMT	protein_coding	MIR4779	ENSG00000265420	86193026	86193108	Intronic
2	87125198	87196629	71432	+	ENSG00000204745	AC083899.1	unprocessed_pseudogene	MIR4771-1	ENSG00000264793	87194786	87194859	Intronic
2	87454781	87636740	181960	+	ENSG00000222041	CYTOR	lincRNA	MIR4435-1	ENSG00000265507	87629755	87629834	Exonic
2	87455476	87767359	311884	+	ENSG00000284879	AC133644.3	processed_transcript	MIR4435-1	ENSG00000265507	87629755	87629834	Intronic
2	96760902	96811891	50990	+	ENSG00000158158	CNNM4	protein_coding	MIR3127	ENSG00000264157	96798278	96798353	Intronic
2	102418689	102452565	33877	+	ENSG00000115607	IL18RAP	protein_coding	MIR4772	ENSG00000264764	102432289	102432366	Intronic
2	110083870	110116566	32697	-	ENSG00000144063	MALL	protein_coding	MIR4436B1	ENSG00000264979	110086433	110086523	Intronic
2	110245591	110285856	40266	+	ENSG00000282304	AC140479.5	processed_transcript	MIR4436B2	ENSG00000263881	110284853	110284943	Intronic
2	110279606	110285681	6076	+	ENSG00000282785	AC140479.6	transcribed_unprocessed_pseudogene	MIR4436B2	ENSG00000263881	110284853	110284943	Intronic
2	111036776	111523376	486601	-	ENSG00000172965	MIR4435-2HG	lincRNA	MIR4435-2	ENSG00000266139	111321013	111321086	Intronic
2	111611639	111884690	273052	-	ENSG00000153107	ANAPC1	protein_coding	MIR4771-2	ENSG00000266063	111771061	111771134	Intronic
2	113705011	113756823	51813	-	ENSG00000115084	SLC35F5	protein_coding	MIR4782	ENSG00000265429	113721290	113721368	Intronic
2	131464900	131492743	27844	-	ENSG00000173272	MZT2A	protein_coding	MIR4784	ENSG00000284149	131491160	131491236	Exonic
2	132147591	132257969	110379	-	ENSG00000163046	ANKRD30BL	protein_coding	MIR663B	ENSG00000221288	132256966	132257080	Intronic
2	134119983	134454621	334639	+	ENSG00000152127	MGAT5	protein_coding	MIR3679	ENSG00000263813	134127125	134127192	Intronic
2	134838547	134902034	63488	+	ENSG00000153086	ACMSD	protein_coding	MIR5590	ENSG00000263783	134857820	134857873	Intronic
2	135531455	135725270	193816	+	ENSG00000048991	R3HDM1	protein_coding	MIR128-1	ENSG00000207654	135665397	135665478	Intronic
2	140231423	142131701	1900279	-	ENSG00000168702	LRP1B	protein_coding	MIR7157	ENSG00000283506	140586626	140586685	Intronic
2	151357592	151380048	22457	+	ENSG00000123610	TNFAIP6	protein_coding	MIR4773-1	ENSG00000264684	151368334	151368411	Intronic
2	158968671	159232659	263989	+	ENSG00000115183	TANC1	protein_coding	MIR6888	ENSG00000275141	159186835	159186901	Intronic
2	160272151	160493794	221644	-	ENSG00000153250	RBMS1	protein_coding	MIR4785	ENSG00000283734	160407810	160407882	Exonic
2	168455862	168775137	319276	+	ENSG00000172292	CERS6	protein_coding	MIR4774	ENSG00000265694	168582943	168583018	Intronic
2	175072250	175168382	96133	-	ENSG00000115966	ATF2	protein_coding	MIR933	ENSG00000215973	175167633	175167709	Intronic
2	176136612	176173102	36491	+	ENSG00000128652	HOXD3	protein_coding	MIR10B	ENSG00000207744	176150303	176150412	Intronic
2	176188579	176190907	2329	+	ENSG00000128645	HOXD1	protein_coding	MIR7704	ENSG00000283880	176188843	176188901	Exonic
2	177212563	177223958	11396	+	ENSG00000170144	HNRNPA3	protein_coding	MIR4444-1	ENSG00000284252	177212726	177212799	Exonic
2	177227595	177392697	165103	-	ENSG00000116044	NFE2L2	protein_coding	MIR3128	ENSG00000265396	177255945	177256010	Intronic
2	177227595	177392697	165103	-	ENSG00000116044	NFE2L2	protein_coding	MIR6512	ENSG00000278418	177313806	177313882	Intronic
2	177283508	177392691	109184	-	ENSG00000213963	AC019080.1	sense_overlapping	MIR6512	ENSG00000278418	177313806	177313882	Intronic
2	179441982	179861505	419524	-	ENSG00000144331	ZNF385B	protein_coding	MIR1258	ENSG00000221240	179860836	179860908	Intronic
2	188291669	188595931	304263	+	ENSG00000144366	GULP1	protein_coding	MIR561	ENSG00000207951	188297492	188297588	Intronic
2	188974320	189012746	38427	+	ENSG00000168542	COL3A1	protein_coding	MIR1245A	ENSG00000221502	188978092	188978161	Intronic
2	188974320	189012746	38427	+	ENSG00000168542	COL3A1	protein_coding	MIR3606	ENSG00000284180	188995630	188995692	SO
2	189031896	189225312	193417	-	ENSG00000204262	COL5A2	protein_coding	MIR3129	ENSG00000264725	189133036	189133111	Intronic
2	206765357	206792509	27153	+	ENSG00000118246	FASTKD2	protein_coding	MIR3130-2	ENSG00000263468	206783234	206783308	Intronic
2	207074137	207167267	93131	-	ENSG00000118263	KLF7	protein_coding	MIR2355	ENSG00000253008	207109987	207110073	Intronic
2	207239864	207529795	289932	-	ENSG00000223725	AC009226.1	antisense	MIR1302-4	ENSG00000221628	207269275	207269424	Intronic
2	207711540	207761839	50300	+	ENSG00000163249	CCNYL1	protein_coding	MIR4775	ENSG00000284079	207754807	207754881	Exonic
2	211375717	212538841	1163125	-	ENSG00000178568	ERBB4	protein_coding	MIR548F2	ENSG00000221782	212426263	212426360	Intronic
2	212581357	213021545	440189	-	ENSG00000273118	AC093865.1	sense_overlapping	MIR4776-2	ENSG00000283637	212926257	212926336	Intronic
2	213284379	214410501	1126123	+	ENSG00000144451	SPAG16	protein_coding	MIR4438	ENSG00000265734	213758067	213758159	Intronic
2	217799588	218033982	234395	-	ENSG00000079308	TNS1	protein_coding	MIR6809	ENSG00000275458	217900513	217900628	Intronic
2	218274192	218292586	18395	-	ENSG00000135926	TMBIM1	protein_coding	MIR6513	ENSG00000284173	218280125	218280188	Exonic
2	218270392	218346793	76402	+	ENSG00000127838	PNKD	protein_coding	MIR6810	ENSG00000278524	218341911	218341980	Intronic
2	218398256	218405941	7686	+	ENSG00000144579	CTDSP1	protein_coding	MIR26B	ENSG00000199121	218402646	218402722	Intronic
2	219054420	219060467	6048	-	ENSG00000163501	IHH	protein_coding	MIR3131	ENSG00000264755	219058688	219058750	Intronic
2	219289623	219309648	20026	-	ENSG00000054356	PTPRN	protein_coding	MIR153-1	ENSG00000207647	219294111	219294200	Intronic
2	224765090	225042445	277356	-	ENSG00000135905	DOCK10	protein_coding	MIR4439	ENSG00000263828	225010461	225010540	Intronic
2	231198546	231374837	176292	+	ENSG00000135931	ARMC9	protein_coding	MIR4777	ENSG00000263641	231362708	231362793	Intronic
2	231706895	231713541	6647	+	ENSG00000187514	PTMA	protein_coding	MIR1244-1	ENSG00000284378	231713314	231713398	Exonic
2	231961245	232344350	383106	+	ENSG00000144535	DIS3L2	protein_coding	MIR562	ENSG00000207626	232172653	232172747	Intronic
2	232547970	232550592	2623	-	ENSG00000221944	TIGD1	protein_coding	MIR5001	ENSG00000284407	232550474	232550573	Exonic
2	237485428	237555318	69891	+	ENSG00000115648	MLPH	protein_coding	MIR6811	ENSG00000277842	237510931	237510988	Intronic
2	239048168	239401654	353487	-	ENSG00000068024	HDAC4	protein_coding	MIR4440	ENSG00000266109	239068817	239068914	Intronic
2	239048168	239401654	353487	-	ENSG00000068024	HDAC4	protein_coding	MIR4441	ENSG00000264810	239085827	239085926	Intronic
2	239048168	239401654	353487	-	ENSG00000068024	HDAC4	protein_coding	MIR2467	ENSG00000264292	239351724	239351804	Intronic
2	239892450	240025402	132953	-	ENSG00000130414	NDUFA10	protein_coding	MIR4786	ENSG00000264279	239943015	239943094	Intronic
2	240435671	240468078	32408	+	ENSG00000063660	GPC1	protein_coding	MIR149	ENSG00000207611	240456001	240456089	Intronic
2	241356243	241494841	138599	+	ENSG00000006607	FARP2	protein_coding	MIR3133	ENSG00000263752	241477905	241477982	Intronic
3	10324023	10708007	383985	-	ENSG00000157087	ATP2B2	protein_coding	MIR885	ENSG00000216135	10394489	10394562	Intronic
3	15450133	15521751	71619	-	ENSG00000206561	COLQ	protein_coding	MIR4270	ENSG00000263573	15496239	15496308	Intronic
3	15667236	15859771	192536	-	ENSG00000206560	ANKRD28	protein_coding	MIR3134	ENSG00000264354	15697298	15697371	Intronic
3	16802651	17090594	287944	+	ENSG00000154822	PLCL2	protein_coding	MIR3714	ENSG00000283885	16933196	16933260	Exonic
3	20040023	20154404	114382	+	ENSG00000114166	KAT2B	protein_coding	MIR3135A	ENSG00000266745	20137565	20137641	Intronic
3	35638945	35794496	155552	+	ENSG00000172995	ARPP21	protein_coding	MIR128-2	ENSG00000207625	35744476	35744559	Intronic
3	37861960	37984469	122510	+	ENSG00000144677	CTDSPL	protein_coding	MIR26A1	ENSG00000199075	37969404	37969480	Intronic
3	39107704	39138903	31200	+	ENSG00000168026	TTC21A	protein_coding	MIR6822	ENSG00000284158	39138206	39138266	SO
3	44761717	44873376	111660	+	ENSG00000163808	KIF15	protein_coding	MIR564	ENSG00000284498	44861888	44861981	Intronic
3	44861869	44865670	3802	+	ENSG00000169964	TMEM42	protein_coding	MIR564	ENSG00000284498	44861888	44861981	Exonic
3	47802909	47850195	47287	+	ENSG00000132153	DHX30	protein_coding	MIR1226	ENSG00000221585	47849555	47849629	Intronic
3	48306842	48328341	21500	-	ENSG00000229453	SPINK8	protein_coding	MIR2115	ENSG00000252466	48316360	48316459	Intronic
3	48517684	48562015	44332	-	ENSG00000114268	PFKFB4	protein_coding	MIR6823	ENSG00000278799	48549961	48550021	Intronic
3	48564073	48595267	31195	-	ENSG00000114270	COL7A1	protein_coding	MIR711	ENSG00000284251	48578902	48578977	SO
3	48625723	48635493	9771	-	ENSG00000225697	SLC26A6	protein_coding	MIR6824	ENSG00000284364	48633636	48633698	Exonic
3	48636469	48662915	26447	-	ENSG00000008300	CELSR3	protein_coding	MIR4793	ENSG00000284575	48644194	48644280	SO
3	49015488	49022293	6806	-	ENSG00000178149	DALRD3	protein_coding	MIR425	ENSG00000199032	49020148	49020234	Intronic
3	49015488	49022293	6806	-	ENSG00000178149	DALRD3	protein_coding	MIR191	ENSG00000207605	49020618	49020709	Intronic
3	49095932	49105135	9204	-	ENSG00000172053	QARS	protein_coding	MIR6890	ENSG00000284488	49099854	49099914	Exonic
3	49805207	49813946	8740	-	ENSG00000182179	UBA7	protein_coding	MIR5193	ENSG00000283726	49806137	49806245	Exonic
3	50155045	50189075	34031	+	ENSG00000001617	SEMA3F	protein_coding	MIR566	ENSG00000207922	50173326	50173419	Intronic
3	50226292	50259355	33064	+	ENSG00000114353	GNAI2	protein_coding	MIR5787	ENSG00000275334	50227436	50227490	Intronic
3	50267558	50277546	9989	+	ENSG00000012171	SEMA3B	protein_coding	MIR6872	ENSG00000283848	50273236	50273297	Exonic
3	52254421	52288020	33600	-	ENSG00000164091	WDR82	protein_coding	MIRLET7G	ENSG00000199150	52268278	52268361	Intronic
3	52288580	52299067	10488	-	ENSG00000242797	GLYCTK-AS1	processed_transcript	MIR135A1	ENSG00000207926	52294219	52294308	Intronic
3	52833121	52897562	64442	-	ENSG00000248592	TMEM110-MUSTN1	protein_coding	MIR8064	ENSG00000275789	52846463	52846552	Intronic
3	52836219	52897596	61378	-	ENSG00000213533	STIMATE	protein_coding	MIR8064	ENSG00000275789	52846463	52846552	Intronic
3	55508308	56468363	960056	-	ENSG00000187672	ERC2	protein_coding	MIR3938	ENSG00000264013	55852492	55852594	Intronic
3	59749310	61251459	1502150	-	ENSG00000189283	FHIT	protein_coding	MIR548BB	ENSG00000281426	60617805	60617870	Intronic
3	69019827	69052339	32513	-	ENSG00000144747	TMF1	protein_coding	MIR3136	ENSG00000265355	69048958	69049035	Intronic
3	70952817	71583993	631177	-	ENSG00000114861	FOXP1	protein_coding	MIR1284	ENSG00000221264	71541970	71542089	Intronic
3	70959226	71754229	795004	-	ENSG00000285708	AC097634.4	protein_coding	MIR1284	ENSG00000221264	71541970	71542089	Intronic
3	75629993	75634057	4065	+	ENSG00000282511	CLUHP10	unprocessed_pseudogene	MIR1324	ENSG00000283894	75630763	75630858	SO
3	84958981	86074429	1115449	+	ENSG00000175161	CADM2	protein_coding	MIR5688	ENSG00000264084	85385710	85385792	Intronic
3	99830141	100114513	284373	-	ENSG00000168386	FILIP1L	protein_coding	MIR3921	ENSG00000264897	99964314	99964398	Intronic
3	112086335	112131004	44670	+	ENSG00000114529	C3orf52	protein_coding	MIR567	ENSG00000207940	112112801	112112898	Intronic
3	113286947	113441610	154664	-	ENSG00000206530	CFAP44	protein_coding	MIR8076	ENSG00000275670	113432118	113432200	Intronic
3	113361901	113515151	153251	-	ENSG00000285943	AC112128.1	protein_coding	MIR8076	ENSG00000275670	113432118	113432200	Intronic
3	113532296	113629578	97283	+	ENSG00000072858	SIDT1	protein_coding	MIR4446	ENSG00000265253	113594876	113594942	Intronic
3	114314501	115147271	832771	-	ENSG00000181722	ZBTB20	protein_coding	MIR568	ENSG00000284134	114316475	114316569	Exonic
3	114314501	114329714	15214	-	ENSG00000259976	AC093010.3	3prime_overlapping_ncRNA	MIR568	ENSG00000284134	114316475	114316569	Exonic
3	114314501	115147271	832771	-	ENSG00000181722	ZBTB20	protein_coding	MIR4796	ENSG00000264623	114743445	114743525	Intronic
3	115802363	117139389	1337027	-	ENSG00000185565	LSAMP	protein_coding	MIR4447	ENSG00000265433	116850277	116850367	Intronic
3	120392293	120451253	58961	-	ENSG00000163430	FSTL1	protein_coding	MIR198	ENSG00000284121	120395668	120395729	Exonic
3	120908072	121424761	516690	+	ENSG00000145087	STXBP5L	protein_coding	MIR5682	ENSG00000264477	121049640	121049715	Intronic
3	123067062	123225227	158166	+	ENSG00000065485	PDIA5	protein_coding	MIR7110	ENSG00000284421	123161794	123161879	Exonic
3	124080023	124726325	646303	+	ENSG00000160145	KALRN	protein_coding	MIR5002	ENSG00000266383	124132929	124133025	Intronic
3	124080023	124726325	646303	+	ENSG00000160145	KALRN	protein_coding	MIR6083	ENSG00000276656	124374332	124374437	Intronic
3	124730366	124749273	18908	+	ENSG00000114491	UMPS	protein_coding	MIR544B	ENSG00000265981	124732439	124732516	Intronic
3	125082636	125212864	130229	-	ENSG00000221955	SLC12A8	protein_coding	MIR5092	ENSG00000264986	125151465	125151552	Intronic
3	127571266	127598267	27002	-	ENSG00000163870	TPRA1	protein_coding	MIR6825	ENSG00000275067	127575266	127575331	Intronic
3	127571266	127598267	27002	-	ENSG00000163870	TPRA1	protein_coding	MIR7976	ENSG00000276083	127587111	127587176	Intronic
3	129249606	129277773	28168	+	ENSG00000181789	COPG1	protein_coding	MIR6826	ENSG00000278658	129272146	129272243	Intronic
3	131533555	132285410	751856	-	ENSG00000196353	CPNE4	protein_coding	MIR5704	ENSG00000265859	131985855	131985931	Intronic
3	134355874	134375479	19606	-	ENSG00000114019	AMOTL2	protein_coding	MIR6827	ENSG00000277723	134367804	134367862	Intronic
3	134437605	134438211	607	+	ENSG00000214288	HMGB3P13	processed_pseudogene	MIR4788	ENSG00000284561	134437827	134437906	Exonic
3	158962235	159897366	935132	+	ENSG00000283154	IQCJ-SCHIP1	protein_coding	MIR3919	ENSG00000263634	159282646	159282734	Intronic
3	160399274	160434962	35689	+	ENSG00000113810	SMC4	protein_coding	MIR15B	ENSG00000207779	160404588	160404685	Intronic
3	160399274	160434962	35689	+	ENSG00000113810	SMC4	protein_coding	MIR16-2	ENSG00000198987	160404745	160404825	Intronic
3	168249522	168830599	581078	+	ENSG00000206120	EGFEM1P	transcribed_unitary_pseudogene	MIR551B	ENSG00000207717	168551854	168551949	Intronic
3	170418865	170454733	35869	+	ENSG00000013297	CLDN11	protein_coding	MIR6828	ENSG00000283474	170423103	170423162	Intronic
3	170418868	170860380	441513	+	ENSG00000285218	AC026316.5	protein_coding	MIR6828	ENSG00000283474	170423103	170423162	Intronic
3	171061339	171460408	399070	-	ENSG00000154310	TNIK	protein_coding	MIR569	ENSG00000207963	171106664	171106759	Intronic
3	174438573	175810552	1371980	+	ENSG00000177694	NAALADL2	protein_coding	MIR4789	ENSG00000264974	175369540	175369621	Intronic
3	183884924	183888449	3526	+	ENSG00000234371	RPSAP31	transcribed_processed_pseudogene	MIR4448	ENSG00000263932	183886800	183886885	Intronic
3	184230429	184242329	11901	+	ENSG00000145198	VWA5B2	protein_coding	MIR1224	ENSG00000221120	184241405	184241489	Intronic
3	185190624	185281990	91367	-	ENSG00000113790	EHHADH	protein_coding	MIR5588	ENSG00000264614	185253210	185253272	Intronic
3	185643739	185825056	181318	-	ENSG00000073792	IGF2BP2	protein_coding	MIR548AQ	ENSG00000265470	185767847	185767904	Intronic
3	186783205	186789900	6696	+	ENSG00000156976	EIF4A2	protein_coding	MIR1248	ENSG00000283958	186786672	186786777	Exonic
3	188153284	188890671	737388	+	ENSG00000145012	LPP	protein_coding	MIR28	ENSG00000207651	188688781	188688866	Intronic
3	189631416	189897279	265864	+	ENSG00000073282	TP63	protein_coding	MIR944	ENSG00000216058	189829922	189830009	Intronic
3	195068279	195271167	202889	-	ENSG00000173950	XXYLT1	protein_coding	MIR3137	ENSG00000265333	195134506	195134580	Intronic
3	195658062	195739964	81903	+	ENSG00000242086	MUC20-OT1	lincRNA	MIR570	ENSG00000207650	195699401	195699497	Intronic
3	195863364	195911945	48582	-	ENSG00000061938	TNK2	protein_coding	MIR6829	ENSG00000276489	195882329	195882395	Intronic
3	197042560	197299300	256741	-	ENSG00000075711	DLG1	protein_coding	MIR4797	ENSG00000265850	197293878	197293948	Intronic
3	197671393	197749727	78335	-	ENSG00000145016	RUBCN	protein_coding	MIR922	ENSG00000284146	197674496	197674576	Exonic
4	337814	384864	47051	+	ENSG00000131127	ZNF141	protein_coding	MIR571	ENSG00000207642	350157	350252	Intronic
4	1982714	2041903	59190	-	ENSG00000185049	NELFA	protein_coding	MIR943	ENSG00000284587	1986384	1986477	Exonic
4	2247432	2262294	14863	-	ENSG00000123933	MXD4	protein_coding	MIR4800	ENSG00000284276	2250077	2250156	Exonic
4	5897373	6200555	303183	-	ENSG00000181215	C4orf50	protein_coding	MIR378D1	ENSG00000263631	5923275	5923328	Intronic
4	7192538	7742836	550299	+	ENSG00000184985	SORCS2	protein_coding	MIR4798	ENSG00000264658	7310450	7310524	Intronic
4	7192538	7742836	550299	+	ENSG00000184985	SORCS2	protein_coding	MIR4274	ENSG00000266690	7460028	7460118	Intronic
4	7965310	8158832	193523	-	ENSG00000163995	ABLIM2	protein_coding	MIR95	ENSG00000207807	8005301	8005381	Intronic
4	10074339	10116949	42611	-	ENSG00000071127	WDR1	protein_coding	MIR3138	ENSG00000264931	10078611	10078692	Intronic
4	20253260	20620561	367302	+	ENSG00000145147	SLIT2	protein_coding	MIR218-1	ENSG00000207732	20528275	20528384	Intronic
4	20728616	21948799	1220184	-	ENSG00000185774	KCNIP4	protein_coding	MIR7978	ENSG00000283281	21464700	21464758	Intronic
4	24517441	24584550	67110	-	ENSG00000109606	DHX15	protein_coding	MIR573	ENSG00000207697	24520192	24520290	Intronic
4	38867677	38945739	78063	+	ENSG00000197712	FAM114A1	protein_coding	MIR574	ENSG00000207944	38868032	38868127	Intronic
4	39406853	39451536	44684	+	ENSG00000134962	KLB	protein_coding	MIR5591	ENSG00000264621	39411910	39411974	Intronic
4	40423267	40630875	207609	-	ENSG00000163694	RBM47	protein_coding	MIR4802	ENSG00000263642	40502040	40502119	Intronic
4	52712404	52720351	7948	+	ENSG00000226950	DANCR	processed_transcript	MIR4449	ENSG00000264585	52712682	52712747	Intronic
4	76435100	76783253	348154	+	ENSG00000138771	SHROOM3	protein_coding	MIR4450	ENSG00000263445	76573568	76573632	Intronic
4	76435100	76783253	348154	+	ENSG00000138771	SHROOM3	protein_coding	MIR548AH	ENSG00000283682	76575551	76575626	Intronic
4	78776342	78916372	140031	+	ENSG00000138756	BMP2K	protein_coding	MIR5096	ENSG00000266270	78820752	78820821	Intronic
4	82629539	82798857	169319	-	ENSG00000145284	SCD5	protein_coding	MIR575	ENSG00000207746	82753337	82753430	Intronic
4	85475114	86002670	527557	+	ENSG00000138639	ARHGAP24	protein_coding	MIR4451	ENSG00000266421	85722468	85722533	Intronic
4	85990007	86594625	604619	-	ENSG00000109339	MAPK10	protein_coding	MIR4452	ENSG00000266515	86542482	86542552	Intronic
4	98995620	99062813	67194	+	ENSG00000164024	METAP1	protein_coding	MIR3684	ENSG00000265213	98997387	98997460	Intronic
4	101023409	101348278	324870	-	ENSG00000138814	PPP3CA	protein_coding	MIR8066	ENSG00000273882	101240795	101240872	Intronic
4	101023409	101348278	324870	-	ENSG00000138814	PPP3CA	protein_coding	MIR1255A	ENSG00000221265	101330302	101330414	Intronic
4	109433772	109540896	107125	+	ENSG00000138802	SEC24B	protein_coding	MIR576	ENSG00000207988	109488698	109488795	Intronic
4	112646476	112650051	3576	-	ENSG00000249532	AC106864.1	antisense	MIR367	ENSG00000199169	112647874	112647941	Intronic
4	112646476	112650051	3576	-	ENSG00000249532	AC106864.1	antisense	MIR302D	ENSG00000199145	112648004	112648071	Intronic
4	112646476	112650051	3576	-	ENSG00000249532	AC106864.1	antisense	MIR302A	ENSG00000207927	112648183	112648251	Intronic
4	112646476	112650051	3576	-	ENSG00000249532	AC106864.1	antisense	MIR302C	ENSG00000199102	112648363	112648430	Intronic
4	112646476	112650051	3576	-	ENSG00000249532	AC106864.1	antisense	MIR302B	ENSG00000284463	112648485	112648557	SO
4	112818109	113383740	565632	+	ENSG00000145362	ANK2	protein_coding	MIR1243	ENSG00000283193	113106863	113106955	Intronic
4	112818109	113383740	565632	+	ENSG00000145362	ANK2	protein_coding	MIR8082	ENSG00000275810	113152282	113152362	Intronic
4	114598455	114678224	79770	+	ENSG00000174607	UGT8	protein_coding	MIR577	ENSG00000207931	114656759	114656854	Intronic
4	116298876	116300320	1445	+	ENSG00000270394	MTRNR2L13	protein_coding	MIR1973	ENSG00000284253	116299725	116299768	Exonic
4	143336762	143474568	137807	+	ENSG00000109458	GAB1	protein_coding	MIR3139	ENSG00000265623	143343460	143343535	Intronic
4	147732063	148072780	340718	+	ENSG00000071205	ARHGAP10	protein_coding	MIR4799	ENSG00000264274	147782595	147782668	Intronic
4	152320544	152536063	215520	-	ENSG00000109670	FBXW7	protein_coding	MIR3140	ENSG00000264678	152489327	152489416	Intronic
4	152536264	152539263	3000	+	ENSG00000268471	MIR4453HG	bidirectional_promoter_lncRNA	MIR4453	ENSG00000283792	152536428	152536516	Exonic
4	159103013	159360174	257162	+	ENSG00000109756	RAPGEF2	protein_coding	MIR3688-2	ENSG00000283379	159128805	159128891	Intronic
4	165361194	165498320	137127	+	ENSG00000109472	CPE	protein_coding	MIR578	ENSG00000207559	165386242	165386337	Intronic
4	173168753	173323967	155215	+	ENSG00000109586	GALNT7	protein_coding	MIR548T	ENSG00000221296	173268160	173268233	Intronic
4	182143987	182803024	659038	+	ENSG00000218336	TENM3	protein_coding	MIR1305	ENSG00000221227	182169293	182169378	Intronic
4	182144852	182190382	45531	+	ENSG00000248266	AC108142.1	sense_intronic	MIR1305	ENSG00000221227	182169293	182169378	Intronic
4	184844585	184855751	11167	-	ENSG00000251230	MIR3945HG	lincRNA	MIR3945	ENSG00000266698	184851013	184851110	Intronic
5	1050376	1112035	61660	-	ENSG00000113504	SLC12A7	protein_coding	MIR4635	ENSG00000263834	1062896	1062974	Intronic
5	1456480	1523977	67498	-	ENSG00000153395	LPCAT1	protein_coding	MIR6075	ENSG00000273742	1510762	1510856	Intronic
5	8450743	8463095	12353	+	ENSG00000247516	MIR4458HG	lincRNA	MIR4458	ENSG00000284000	8460925	8460999	Exonic
5	9035026	9546075	511050	-	ENSG00000112902	SEMA5A	protein_coding	MIR4636	ENSG00000266415	9053816	9053895	Intronic
5	14704800	14871785	166986	-	ENSG00000154122	ANKH	protein_coding	MIR4637	ENSG00000264792	14825929	14826012	Intronic
5	15500196	15939795	439600	+	ENSG00000183580	FBXL7	protein_coding	MIR887	ENSG00000216077	15935182	15935260	Intronic
5	32354350	32444761	90412	-	ENSG00000056097	ZFR	protein_coding	MIR579	ENSG00000207956	32394378	32394475	Intronic
5	36098412	36151961	53550	-	ENSG00000164187	LMBRD2	protein_coding	MIR580	ENSG00000207756	36147892	36147988	Intronic
5	38474963	38608354	133392	-	ENSG00000113594	LIFR	protein_coding	MIR3650	ENSG00000265304	38557502	38557561	Intronic
5	53883945	54310582	426638	-	ENSG00000185305	ARL15	protein_coding	MIR581	ENSG00000207627	53951504	53951599	Intronic
5	53883945	54310582	426638	-	ENSG00000185305	ARL15	protein_coding	MIR4459	ENSG00000265421	54075518	54075583	Intronic
5	55112995	55173175	60181	-	ENSG00000164287	CDC20B	protein_coding	MIR449A	ENSG00000198983	55170532	55170622	Intronic
5	55112995	55173175	60181	-	ENSG00000164287	CDC20B	protein_coding	MIR449B	ENSG00000207728	55170646	55170742	Intronic
5	55112995	55173175	60181	-	ENSG00000164287	CDC20B	protein_coding	MIR449C	ENSG00000251856	55172262	55172353	Intronic
5	55424854	55535050	110197	-	ENSG00000067113	PLPP1	protein_coding	MIR5687	ENSG00000265135	55508850	55508926	Intronic
5	58969038	60522120	1553083	-	ENSG00000113448	PDE4D	protein_coding	MIR582	ENSG00000202601	59703606	59703703	Intronic
5	72107234	72209570	102337	+	ENSG00000131711	MAP1B	protein_coding	MIR4803	ENSG00000264099	72169467	72169540	Intronic
5	72816312	72916733	100422	+	ENSG00000083312	TNPO1	protein_coding	MIR4804	ENSG00000263593	72878591	72878663	Intronic
5	86617904	86620962	3059	+	ENSG00000127184	COX7C	protein_coding	AC108110.1	ENSG00000284078	86620497	86620575	Exonic
5	88507546	88691041	183496	-	ENSG00000245526	LINC00461	lincRNA	MIR9-2	ENSG00000284447	88666853	88666939	Exonic
5	93618069	94111699	493631	-	ENSG00000113391	FAM172A	protein_coding	MIR2277	ENSG00000284336	93620696	93620788	Exonic
5	95962001	96631085	669085	+	ENSG00000251314	AC104123.1	antisense	MIR583	ENSG00000207578	96079138	96079212	Intronic
5	96050115	96215519	165405	+	ENSG00000250551	MIR583HG	lincRNA	MIR583	ENSG00000207578	96079138	96079212	Intronic
5	100806935	100903266	96332	-	ENSG00000113532	ST8SIA4	protein_coding	MIR548P	ENSG00000221263	100816482	100816565	Intronic
5	110289233	110738956	449724	-	ENSG00000186952	TMEM232	protein_coding	MIR548F3	ENSG00000221436	110513829	110513915	Intronic
5	119037772	119249138	211367	+	ENSG00000172869	DMXL1	protein_coding	MIR5706	ENSG00000264536	119154637	119154716	Intronic
5	129094751	129114028	19278	+	ENSG00000066583	ISOC1	protein_coding	MIR4633	ENSG00000264563	129097688	129097766	Intronic
5	132191838	132295315	103478	-	ENSG00000072682	P4HA2	protein_coding	MIR6830	ENSG00000283678	132217849	132217918	Intronic
5	132311285	132369916	58632	-	ENSG00000233006	MIR3936HG	processed_transcript	MIR3936	ENSG00000263597	132365490	132365599	Intronic
5	133196455	133612564	416110	-	ENSG00000053108	FSTL4	protein_coding	MIR1289-2	ENSG00000221287	133427596	133427706	Intronic
5	134904906	135007959	103054	+	ENSG00000132570	PCBD2	protein_coding	MIR4461	ENSG00000263963	134928039	134928112	Intronic
5	137617500	137736090	118591	-	ENSG00000146021	KLHL3	protein_coding	MIR874	ENSG00000216009	137647572	137647649	Intronic
5	140558268	140564781	6514	-	ENSG00000113108	APBB3	protein_coding	MIR6831	ENSG00000283717	140563671	140563751	Exonic
5	140562443	140592123	29681	-	ENSG00000283155	AC116353.4	processed_transcript	MIR6831	ENSG00000283717	140563671	140563751	Intronic
5	140647058	140662479	15422	+	ENSG00000113141	IK	protein_coding	MIR3655	ENSG00000284325	140647844	140647926	SO
5	143605628	143828772	223145	+	ENSG00000249881	AC008696.2	sense_overlapping	MIR5197	ENSG00000266478	143679860	143679971	Intronic
5	148923639	149063163	139525	-	ENSG00000169247	SH3TC2	protein_coding	MIR584	ENSG00000207714	149062313	149062409	Intronic
5	149406689	149432835	26147	+	ENSG00000249669	CARMN	lincRNA	MIR143	ENSG00000284182	149428918	149429023	Exonic
5	149406689	149432835	26147	+	ENSG00000249669	CARMN	lincRNA	MIR145	ENSG00000276365	149430646	149430733	Intronic
5	149730298	149855022	124725	+	ENSG00000155846	PPARGC1B	protein_coding	MIR378A	ENSG00000199047	149732825	149732890	Intronic
5	151504093	151568944	64852	-	ENSG00000086570	FAT2	protein_coding	MIR6499	ENSG00000276622	151522087	151522148	Intronic
5	154190730	154420984	230255	+	ENSG00000164574	GALNT10	protein_coding	MIR1294	ENSG00000221430	154347106	154347247	Intronic
5	160438594	160487426	48833	+	ENSG00000253522	MIR3142HG	lincRNA	MIR3142	ENSG00000265237	160474402	160474483	Intronic
5	160438594	160487426	48833	+	ENSG00000253522	MIR3142HG	lincRNA	MIR146A	ENSG00000283733	160485352	160485450	Exonic
5	168548495	168579600	31106	-	ENSG00000120137	PANK3	protein_coding	MIR103A1	ENSG00000199035	168560896	168560973	Intronic
5	168661733	169301129	639397	-	ENSG00000184347	SLIT3	protein_coding	MIR218-2	ENSG00000207739	168768146	168768255	Intronic
5	168661733	169301129	639397	-	ENSG00000184347	SLIT3	protein_coding	MIR585	ENSG00000207619	169263601	169263694	Intronic
5	169637247	170083382	446136	+	ENSG00000134516	DOCK2	protein_coding	MIR378E	ENSG00000263831	170028488	170028566	Intronic
5	172641266	172691540	50275	+	ENSG00000214357	NEURL1B	protein_coding	MIR5003	ENSG00000265160	172662165	172662263	Intronic
5	174751304	174850725	99422	+	ENSG00000251670	AC113346.2	lincRNA	MIR4634	ENSG00000266890	174751734	174751787	Intronic
5	176365468	176401865	36398	+	ENSG00000175414	ARL10	protein_coding	MIR1271	ENSG00000221464	176367946	176368031	Intronic
5	176620084	176630556	10473	-	ENSG00000074317	SNCB	protein_coding	MIR4281	ENSG00000266329	176629439	176629500	Intronic
5	179797597	179806952	9356	-	ENSG00000161013	MGAT4B	protein_coding	MIR1229	ENSG00000221394	179798278	179798346	Intronic
5	179911651	180072118	160468	-	ENSG00000113269	RNF130	protein_coding	MIR340	ENSG00000198995	180015303	180015397	Intronic
6	5102593	5260939	158347	-	ENSG00000214113	LYRM4	protein_coding	MIR3691	ENSG00000265083	5148233	5148322	Intronic
6	6144085	6321013	176929	-	ENSG00000124491	F13A1	protein_coding	MIR7853	ENSG00000263572	6169304	6169435	Intronic
6	10434316	10456781	22466	+	ENSG00000229401	MIR5689HG	lincRNA	MIR5689	ENSG00000263705	10439717	10439794	Intronic
6	16129125	16148248	19124	+	ENSG00000007944	MYLIP	protein_coding	MIR4639	ENSG00000263712	16141556	16141624	Intronic
6	18522739	18674001	151263	+	ENSG00000283408	MIR548A1HG	lincRNA	MIR548A1	ENSG00000207775	18571784	18571880	Intronic
6	30571376	30597179	25804	+	ENSG00000204574	ABCF1	protein_coding	MIR877	ENSG00000216101	30584332	30584417	Intronic
6	30876421	30900156	23736	+	ENSG00000204580	DDR1	protein_coding	MIR4640	ENSG00000284370	30890883	30890972	Exonic
6	31269491	31357188	87698	-	ENSG00000234745	HLA-B	protein_coding	MIR6891	ENSG00000277402	31355224	31355316	Intronic
6	31620720	31637771	17052	+	ENSG00000204469	PRRC2A	protein_coding	MIR6832	ENSG00000274494	31633787	31633858	Intronic
6	31686949	31703444	16496	-	ENSG00000204427	ABHD16A	protein_coding	MIR4646	ENSG00000266776	31701029	31701091	Intronic
6	31686962	31714072	27111	-	ENSG00000204422	AL662899.1	protein_coding	MIR4646	ENSG00000266776	31701029	31701091	Intronic
6	31952087	31959110	7024	-	ENSG00000204356	NELFE	protein_coding	MIR1236	ENSG00000284446	31956839	31956940	Exonic
6	32168212	32178096	9885	-	ENSG00000204310	AGPAT1	protein_coding	MIR6721	ENSG00000284469	32170030	32170116	SO
6	32178354	32180793	2440	+	ENSG00000204308	RNF5	protein_coding	MIR6833	ENSG00000277264	32179816	32179876	Intronic
6	33279108	33289527	10420	-	ENSG00000227057	WDR46	protein_coding	MIR6873	ENSG00000284517	33287227	33287289	SO
6	33289302	33298401	9100	+	ENSG00000204220	PFDN6	protein_coding	MIR6834	ENSG00000284064	33290245	33290325	Exonic
6	33419661	33457541	37881	+	ENSG00000197283	SYNGAP1	protein_coding	MIR5004	ENSG00000284256	33438331	33438437	SO
6	33893323	33927631	34309	+	ENSG00000233183	AL138889.1	lincRNA	MIR7159	ENSG00000276824	33899135	33899200	Intronic
6	34236873	34246231	9359	+	ENSG00000137309	HMGA1	protein_coding	MIR6835	ENSG00000276404	34240673	34240736	Intronic
6	35468408	35470785	2378	+	ENSG00000198755	RPL10A	protein_coding	MIR7111	ENSG00000276712	35470508	35470579	Intronic
6	35573585	35728583	154999	-	ENSG00000096060	FKBP5	protein_coding	MIR5690	ENSG00000265527	35664717	35664789	Intronic
6	41546426	41602384	55959	+	ENSG00000137166	FOXP4	protein_coding	MIR4641	ENSG00000266494	41598723	41598788	Intronic
6	43427366	43450430	23065	+	ENSG00000124574	ABCC10	protein_coding	MIR6780B	ENSG00000276770	43434542	43434620	Intronic
6	44254096	44257890	3795	-	ENSG00000157593	SLC35B2	protein_coding	MIR4647	ENSG00000284427	44254206	44254285	Exonic
6	44387525	44450426	62902	+	ENSG00000096401	CDC5L	protein_coding	MIR4642	ENSG00000266619	44435641	44435722	Intronic
6	44809317	45377953	568637	-	ENSG00000196284	SUPT3H	protein_coding	MIR586	ENSG00000207769	45197674	45197770	Intronic
6	57314805	57646849	332045	+	ENSG00000146143	PRIM2	protein_coding	MIR548U	ENSG00000212017	57390132	57390212	Intronic
6	71295173	71417436	122264	-	ENSG00000269966	AL136164.2	lincRNA	MIR30C2	ENSG00000199094	71376960	71377031	Intronic
6	71344344	71420769	76426	-	ENSG00000233237	LINC00472	lincRNA	MIR30C2	ENSG00000199094	71376960	71377031	Intronic
6	71295173	71417436	122264	-	ENSG00000269966	AL136164.2	lincRNA	MIR30A	ENSG00000207827	71403551	71403621	Intronic
6	71344344	71420769	76426	-	ENSG00000233237	LINC00472	lincRNA	MIR30A	ENSG00000207827	71403551	71403621	Intronic
6	97283303	98399872	1116570	+	ENSG00000271860	AL589740.1	lincRNA	MIR2113	ENSG00000238367	98024531	98024621	Intronic
6	118959763	119149387	189625	-	ENSG00000111879	FAM184A	protein_coding	MIR548B	ENSG00000207982	119069047	119069143	Intronic
6	134960378	135103056	142679	-	ENSG00000112339	HBS1L	protein_coding	MIR3662	ENSG00000283409	134979338	134979432	Intronic
6	138422043	138692571	270529	-	ENSG00000135540	NHSL1	protein_coding	MIR3145	ENSG00000266555	138435213	138435294	Intronic
6	154832697	155257723	425027	+	ENSG00000146426	TIAM2	protein_coding	MIR1273C	ENSG00000264814	154853360	154853436	Intronic
6	157381133	157678146	297014	+	ENSG00000175048	ZDHHC14	protein_coding	MIR3692	ENSG00000266617	157529132	157529200	Intronic
6	158536436	158635428	98993	+	ENSG00000146433	TMEM181	protein_coding	MIR7161	ENSG00000278571	158609707	158609790	Intronic
6	166409364	166906451	497088	-	ENSG00000071242	RPS6KA2	protein_coding	MIR1913	ENSG00000222958	166509354	166509433	Intronic
6	166969626	166999065	29440	-	ENSG00000227598	Z94721.1	bidirectional_promoter_lncRNA	MIR3939	ENSG00000265828	166997807	166997912	Intronic
6	166995735	166999511	3777	-	ENSG00000285730	Z94721.3	bidirectional_promoter_lncRNA	MIR3939	ENSG00000265828	166997807	166997912	Intronic
6	170290703	170407065	116363	+	ENSG00000112584	FAM120B	protein_coding	MIR4644	ENSG00000266245	170330761	170330844	Intronic
7	996986	1138260	141275	-	ENSG00000146540	C7orf50	protein_coding	MIR339	ENSG00000199023	1022933	1023026	Intronic
7	1815793	2233243	417451	-	ENSG00000002822	MAD1L1	protein_coding	MIR4655	ENSG00000265089	1844180	1844253	Intronic
7	2251770	2354318	102549	-	ENSG00000106266	SNX8	protein_coding	MIR6836	ENSG00000284047	2257515	2257577	Exonic
7	2512529	2529177	16649	+	ENSG00000106003	LFNG	protein_coding	MIR4648	ENSG00000264357	2527074	2527145	Intronic
7	5431335	5513798	82464	-	ENSG00000155034	FBXL18	protein_coding	MIR589	ENSG00000207973	5495819	5495917	Intronic
7	5620047	5781739	161693	-	ENSG00000011275	RNF216	protein_coding	MIR6874	ENSG00000283419	5711840	5711910	Intronic
7	19695462	19709087	13626	-	ENSG00000105849	TWISTNB	protein_coding	MIR3146	ENSG00000265932	19705358	19705436	Intronic
7	21428034	21514822	86789	+	ENSG00000105866	SP4	protein_coding	MIR1183	ENSG00000221783	21471058	21471146	Intronic
7	27162435	27175180	12746	-	ENSG00000078399	HOXA9	protein_coding	MIR196B	ENSG00000283745	27169480	27169563	Exonic
7	27163535	27180013	16479	-	ENSG00000257184	AC004080.3	protein_coding	MIR196B	ENSG00000283745	27169480	27169563	Intronic
7	29598795	29685255	86461	-	ENSG00000225264	ZNRF2P2	transcribed_processed_pseudogene	MIR550A3	ENSG00000212024	29680734	29680828	Intronic
7	30284307	30367692	83386	+	ENSG00000180233	ZNRF2	protein_coding	MIR550A1	ENSG00000207771	30289794	30289890	Intronic
7	32580949	32761787	180839	-	ENSG00000229358	DPY19L1P1	unprocessed_pseudogene	MIR550B2	ENSG00000283461	32732981	32733077	Intronic
7	32728569	32753744	25176	+	ENSG00000237004	ZNRF2P1	transcribed_processed_pseudogene	MIR550A2	ENSG00000207573	32732981	32733077	Intronic
7	34928876	35038271	109396	-	ENSG00000173852	DPY19L1	protein_coding	MIR548N	ENSG00000221669	34940760	34940834	Intronic
7	36854361	37449249	594889	-	ENSG00000155849	ELMO1	protein_coding	MIR1200	ENSG00000221325	36919357	36919432	Intronic
7	43112599	43566001	453403	+	ENSG00000002746	HECW1	protein_coding	MIR3943	ENSG00000264069	43150895	43150994	Intronic
7	43117896	43163187	45292	+	ENSG00000181211	HECW1-IT1	sense_intronic	MIR3943	ENSG00000264069	43150895	43150994	Intronic
7	44044640	44069456	24817	+	ENSG00000136279	DBNL	protein_coding	MIR6837	ENSG00000284067	44051766	44051829	Exonic
7	44072247	44082540	10294	-	ENSG00000122678	POLM	protein_coding	MIR6838	ENSG00000283969	44073378	44073433	SO
7	44104361	44114562	10202	+	ENSG00000106624	AEBP1	protein_coding	MIR4649	ENSG00000284412	44110849	44110912	Exonic
7	44876293	44885361	9069	-	ENSG00000146676	PURB	protein_coding	MIR4657	ENSG00000284261	44881748	44881800	Exonic
7	57404771	57416203	11433	+	ENSG00000260653	AC237221.1	lincRNA	MIR3147	ENSG00000266168	57405025	57405090	Intronic
7	64666083	64711582	45500	+	ENSG00000196247	ZNF107	protein_coding	MIR6839	ENSG00000275667	64679064	64679176	SO
7	71132169	71713600	581432	+	ENSG00000185274	GALNT17	protein_coding	MIR3914-2	ENSG00000283278	71307674	71307768	Intronic
7	74174245	74197101	22857	+	ENSG00000106682	EIF4H	protein_coding	MIR590	ENSG00000207741	74191198	74191294	Intronic
7	75899200	75986855	87656	+	ENSG00000127948	POR	protein_coding	MIR4651	ENSG00000284334	75915197	75915269	Exonic
7	92131774	92245924	114151	-	ENSG00000285953	AC000120.3	protein_coding	MIR1285-1	ENSG00000221520	92204015	92204098	Intronic
7	92198969	92246166	47198	-	ENSG00000001631	KRIT1	protein_coding	MIR1285-1	ENSG00000221520	92204015	92204098	Intronic
7	92200014	92206857	6844	-	ENSG00000243107	AC000120.1	sense_overlapping	MIR1285-1	ENSG00000221520	92204015	92204098	Intronic
7	93424487	93574730	150244	-	ENSG00000004948	CALCR	protein_coding	MIR653	ENSG00000208014	93482760	93482855	Intronic
7	93424487	93574730	150244	-	ENSG00000004948	CALCR	protein_coding	MIR489	ENSG00000207656	93483936	93484019	Intronic
7	93591573	93911265	319693	+	ENSG00000127928	GNGT1	protein_coding	MIR4652	ENSG00000265423	93716928	93717005	Intronic
7	96120220	96322147	201928	-	ENSG00000004864	SLC25A13	protein_coding	MIR591	ENSG00000208025	96219662	96219756	Intronic
7	97851688	97972985	121298	-	ENSG00000284707	AC079781.5	processed_transcript	MIR5692C2	ENSG00000266668	97964405	97964481	Intronic
7	98877933	99050831	172899	+	ENSG00000196367	TRRAP	protein_coding	MIR3609	ENSG00000266019	98881650	98881729	Intronic
7	100092728	100101940	9213	-	ENSG00000166508	MCM7	protein_coding	MIR25	ENSG00000207547	100093560	100093643	Intronic
7	100092728	100101940	9213	-	ENSG00000166508	MCM7	protein_coding	MIR93	ENSG00000207757	100093768	100093847	Intronic
7	100092728	100101940	9213	-	ENSG00000166508	MCM7	protein_coding	MIR106B	ENSG00000208036	100093993	100094074	Intronic
7	100154420	100158715	4296	-	ENSG00000146826	C7orf43	protein_coding	MIR4658	ENSG00000284518	100156605	100156669	SO
7	100336104	100367831	31728	+	ENSG00000272752	STAG3L5P-PVRIG2P-PILRB	processed_transcript	MIR6840	ENSG00000284012	100356651	100356721	Intronic
7	100352176	100367733	15558	+	ENSG00000121716	PILRB	protein_coding	MIR6840	ENSG00000284012	100356651	100356721	Exonic
7	100867138	100873454	6317	+	ENSG00000087077	TRIP6	protein_coding	MIR6875	ENSG00000283821	100868036	100868107	Exonic
7	101154400	101161596	7197	+	ENSG00000106367	AP1S1	protein_coding	MIR4653	ENSG00000264425	101159473	101159555	Intronic
7	102285091	102321711	36621	+	ENSG00000160999	SH2B2	protein_coding	MIR4285	ENSG00000264675	102293103	102293187	Intronic
7	102464929	102473168	8240	+	ENSG00000161036	LRWD1	protein_coding	MIR5090	ENSG00000284176	102465742	102465826	Exonic
7	102464929	102473168	8240	+	ENSG00000161036	LRWD1	protein_coding	MIR4467	ENSG00000284596	102471469	102471531	Exonic
7	114086327	114693772	607446	+	ENSG00000128573	FOXP2	protein_coding	MIR3666	ENSG00000272230	114653345	114653455	Intronic
7	116953238	117230103	276866	+	ENSG00000004866	ST7	protein_coding	MIR6132	ENSG00000283923	117020211	117020319	Exonic
7	116953899	117098806	144908	+	ENSG00000214188	ST7-OT4	sense_intronic	MIR6132	ENSG00000283923	117020211	117020319	Intronic
7	126438598	127253294	814697	-	ENSG00000179603	GRM8	protein_coding	MIR592	ENSG00000207692	127058088	127058184	Intronic
7	127652180	128092609	440430	+	ENSG00000197157	SND1	protein_coding	MIR593	ENSG00000207588	128081861	128081960	Intronic
7	130486171	130506465	20295	+	ENSG00000106484	MEST	protein_coding	MIR335	ENSG00000199043	130496111	130496204	Intronic
7	130791264	131110161	318898	-	ENSG00000285106	AC016831.6	lincRNA	MIR29A	ENSG00000284032	130876747	130876810	Intronic
7	130791264	131110161	318898	-	ENSG00000285106	AC016831.6	lincRNA	MIR29B1	ENSG00000283797	130877459	130877539	Intronic
7	130876809	130913310	36502	-	ENSG00000226380	LINC-PINT	lincRNA	MIR29B1	ENSG00000283797	130877459	130877539	Exonic
7	132784868	133082088	297221	-	ENSG00000106554	CHCHD3	protein_coding	MIR3654	ENSG00000284135	133034860	133034915	Intronic
7	133034607	133035920	1314	-	ENSG00000283041	AC008038.1	processed_pseudogene	MIR3654	ENSG00000284135	133034860	133034915	Exonic
7	133253073	134066589	813517	+	ENSG00000131558	EXOC4	protein_coding	MIR6133	ENSG00000276137	133290881	133290988	Intronic
7	135183839	135211534	27696	-	ENSG00000105875	WDR91	protein_coding	MIR6509	ENSG00000277138	135206994	135207078	Intronic
7	136868669	137020255	151587	+	ENSG00000181072	CHRM2	protein_coding	MIR490	ENSG00000207597	136903167	136903294	Intronic
7	138122202	138124595	2394	+	ENSG00000233951	RCC2P3	processed_pseudogene	MIR4468	ENSG00000284028	138123758	138123821	Exonic
7	143381080	143391111	10032	+	ENSG00000159840	ZYX	protein_coding	MIR6892	ENSG00000278449	143382686	143382800	Intronic
7	151232489	151238827	6339	+	ENSG00000033100	CHPF2	protein_coding	MIR671	ENSG00000284191	151238421	151238538	Exonic
7	151428835	151440813	11979	-	ENSG00000127377	CRYGN	protein_coding	MIR3907	ENSG00000265810	151433489	151433639	Intronic
7	157539056	158587788	1048733	-	ENSG00000155093	PTPRN2	protein_coding	MIR153-2	ENSG00000207960	157574336	157574422	Intronic
7	157539056	158587788	1048733	-	ENSG00000155093	PTPRN2	protein_coding	MIR595	ENSG00000207637	158532718	158532813	Intronic
X	1268800	1310381	41582	+	ENSG00000198223	CSF2RA	protein_coding	MIR3690	ENSG00000265658	1293918	1293992	Intronic
X	8045186	8231386	186201	+	ENSG00000285679	AC097626.1	antisense	MIR651	ENSG00000207628	8126965	8127061	Intronic
X	11137543	11665701	528159	-	ENSG00000047648	ARHGAP6	protein_coding	MIR548AX	ENSG00000263652	11318614	11318686	Intronic
X	13569605	13633575	63971	+	ENSG00000198759	EGFL6	protein_coding	MIR6086	ENSG00000283493	13590292	13590346	Intronic
X	16588003	16712936	124934	-	ENSG00000047230	CTPS2	protein_coding	MIR548AM	ENSG00000265144	16627012	16627085	Intronic
X	17375420	17735994	360575	+	ENSG00000188158	NHS	protein_coding	MIR4768	ENSG00000265465	17425881	17425954	Intronic
X	20006713	20116917	110205	-	ENSG00000184368	MAP7D2	protein_coding	MIR23C	ENSG00000264566	20017088	20017187	Intronic
X	28587399	29956723	1369325	+	ENSG00000169306	IL1RAPL1	protein_coding	MIR4666B	ENSG00000264090	29574278	29574358	Intronic
X	31097677	33339441	2241765	-	ENSG00000198947	DMD	protein_coding	MIR3915	ENSG00000263600	32583656	32583752	Intronic
X	31097677	33339441	2241765	-	ENSG00000198947	DMD	protein_coding	MIR548F5	ENSG00000221348	32641474	32641559	Intronic
X	45745211	45770274	25064	-	ENSG00000270069	MIR222HG	lincRNA	MIR221	ENSG00000207870	45746157	45746266	Intronic
X	45745211	45770274	25064	-	ENSG00000270069	MIR222HG	lincRNA	MIR222	ENSG00000207725	45747015	45747124	Intronic
X	49922615	50099235	176621	+	ENSG00000171365	CLCN5	protein_coding	MIR532	ENSG00000207758	50003148	50003238	Intronic
X	49922615	50099235	176621	+	ENSG00000171365	CLCN5	protein_coding	MIR188	ENSG00000207768	50003503	50003588	Intronic
X	49922615	50099235	176621	+	ENSG00000171365	CLCN5	protein_coding	MIR500A	ENSG00000207785	50008431	50008514	Intronic
X	49922615	50099235	176621	+	ENSG00000171365	CLCN5	protein_coding	MIR362	ENSG00000208015	50008964	50009028	Intronic
X	49922615	50099235	176621	+	ENSG00000171365	CLCN5	protein_coding	MIR501	ENSG00000211538	50009722	50009805	Intronic
X	49922615	50099235	176621	+	ENSG00000171365	CLCN5	protein_coding	MIR500B	ENSG00000239057	50010672	50010750	Intronic
X	49922615	50099235	176621	+	ENSG00000171365	CLCN5	protein_coding	MIR660	ENSG00000207970	50013241	50013337	Intronic
X	49922615	50099235	176621	+	ENSG00000171365	CLCN5	protein_coding	MIR502	ENSG00000272080	50014598	50014683	Intronic
X	53191321	53225422	34102	-	ENSG00000126012	KDM5C	protein_coding	MIR6895	ENSG00000276575	53195411	53195488	Intronic
X	53191321	53225422	34102	-	ENSG00000126012	KDM5C	protein_coding	MIR6894	ENSG00000277474	53198889	53198945	Intronic
X	53374149	53422728	48580	-	ENSG00000072501	SMC1A	protein_coding	MIR6857	ENSG00000278204	53405673	53405765	Intronic
X	53532096	53686729	154634	-	ENSG00000086758	HUWE1	protein_coding	MIR98	ENSG00000271886	53556223	53556341	Intronic
X	53532096	53686729	154634	-	ENSG00000086758	HUWE1	protein_coding	MIRLET7F2	ENSG00000208012	53557192	53557274	Intronic
X	63634967	63809274	174308	-	ENSG00000131089	ARHGEF9	protein_coding	MIR1468	ENSG00000222532	63786002	63786087	Intronic
X	66015461	66020422	4962	+	ENSG00000274536	AL034397.3	antisense	MIR223	ENSG00000284567	66018870	66018979	Exonic
X	69616067	70039469	423403	+	ENSG00000158813	EDA	protein_coding	MIR676	ENSG00000211991	70022857	70022923	Intronic
X	73946555	74293574	347020	-	ENSG00000230590	FTX	lincRNA	MIR421	ENSG00000202566	74218377	74218461	Intronic
X	73946555	74293574	347020	-	ENSG00000230590	FTX	lincRNA	MIR374B	ENSG00000212027	74218547	74218618	Intronic
X	73946555	74293574	347020	-	ENSG00000230590	FTX	lincRNA	MIR545	ENSG00000207820	74287104	74287209	Intronic
X	73946555	74293574	347020	-	ENSG00000230590	FTX	lincRNA	MIR374A	ENSG00000199168	74287286	74287357	Intronic
X	76657798	77014532	356735	-	ENSG00000280870	MIR325HG	lincRNA	MIR384	ENSG00000283242	76919273	76919360	Intronic
X	76657798	77014532	356735	-	ENSG00000280870	MIR325HG	lincRNA	MIR325	ENSG00000207995	77005404	77005501	Intronic
X	85861180	86047562	186383	-	ENSG00000188419	CHM	protein_coding	MIR361	ENSG00000199051	85903636	85903707	Intronic
X	106611930	106679442	67513	+	ENSG00000147231	CXorf57	protein_coding	MIR548AN	ENSG00000263515	106639814	106639896	Intronic
X	110002631	110182734	180104	+	ENSG00000157600	TMEM164	protein_coding	MIR652	ENSG00000208013	110055329	110055426	Intronic
X	110002631	110182734	180104	+	ENSG00000157600	TMEM164	protein_coding	MIR3978	ENSG00000265584	110082118	110082218	Intronic
X	112774503	112840815	66313	-	ENSG00000126016	AMOT	protein_coding	MIR4329	ENSG00000283775	112780718	112780788	Exonic
X	114584078	114910061	325984	+	ENSG00000147246	HTR2C	protein_coding	MIR764	ENSG00000212100	114639435	114639519	Intronic
X	114584078	114910061	325984	+	ENSG00000147246	HTR2C	protein_coding	MIR1912	ENSG00000222321	114651544	114651623	Intronic
X	114584078	114910061	325984	+	ENSG00000147246	HTR2C	protein_coding	MIR1264	ENSG00000276158	114652655	114652723	Intronic
X	114584078	114910061	325984	+	ENSG00000147246	HTR2C	protein_coding	MIR1298	ENSG00000221710	114715233	114715344	Intronic
X	114584078	114910061	325984	+	ENSG00000147246	HTR2C	protein_coding	MIR1911	ENSG00000222715	114763184	114763263	Intronic
X	114584078	114910061	325984	+	ENSG00000147246	HTR2C	protein_coding	MIR448	ENSG00000199001	114823454	114823564	Intronic
X	118346073	118449961	103889	+	ENSG00000131725	WDR44	protein_coding	MIR1277	ENSG00000221463	118386394	118386471	Intronic
X	119615724	119693370	77647	-	ENSG00000125354	2019-09-06	protein_coding	MIR766	ENSG00000211578	119646738	119646848	Intronic
X	134168911	134174089	5179	-	ENSG00000283638	AC002407.1	processed_transcript	MIR363	ENSG00000284499	134169378	134169452	Exonic
X	134168911	134174089	5179	-	ENSG00000283638	AC002407.1	processed_transcript	MIR92A2	ENSG00000284538	134169538	134169612	Exonic
X	134168911	134174089	5179	-	ENSG00000283638	AC002407.1	processed_transcript	MIR19B2	ENSG00000284107	134169671	134169766	Exonic
X	134168911	134174089	5179	-	ENSG00000283638	AC002407.1	processed_transcript	MIR20B	ENSG00000284043	134169809	134169877	Exonic
X	134168911	134174089	5179	-	ENSG00000283638	AC002407.1	processed_transcript	MIR18B	ENSG00000283931	134170041	134170111	Exonic
X	134168911	134174089	5179	-	ENSG00000283638	AC002407.1	processed_transcript	MIR106A	ENSG00000284157	134170198	134170278	Exonic
X	134543337	134546632	3296	-	ENSG00000223749	MIR503HG	lincRNA	MIR503	ENSG00000208005	134546328	134546398	Intronic
X	136532152	136556807	24656	+	ENSG00000102243	VGLL1	protein_coding	MIR934	ENSG00000216060	136550878	136550960	Intronic
X	138614731	139222777	608047	-	ENSG00000129682	FGF13	protein_coding	MIR504	ENSG00000207800	138667711	138667793	Intronic
X	139726346	139945276	218931	-	ENSG00000101974	ATP11C	protein_coding	MIR505	ENSG00000207633	139924148	139924231	Intronic
X	151953124	151974680	21557	-	ENSG00000102287	GABRE	protein_coding	MIR224	ENSG00000284363	151958578	151958658	Exonic
X	151953124	151974680	21557	-	ENSG00000102287	GABRE	protein_coding	MIR452	ENSG00000283751	151959628	151959712	Exonic
X	152166234	152451358	285125	-	ENSG00000011677	GABRA3	protein_coding	MIR105-1	ENSG00000207957	152392219	152392299	Intronic
X	152166234	152451358	285125	-	ENSG00000011677	GABRA3	protein_coding	MIR767	ENSG00000211583	152393421	152393529	Intronic
X	152166234	152451358	285125	-	ENSG00000011677	GABRA3	protein_coding	MIR105-2	ENSG00000207818	152394412	152394492	Intronic
X	153972327	153983195	10869	+	ENSG00000177854	TMEM187	protein_coding	MIR3202-1	ENSG00000265176	153981097	153981177	Intronic
X	154444126	154450654	6529	+	ENSG00000071859	FAM50A	protein_coding	MIR6858	ENSG00000276350	154450320	154450386	Intronic
X	154762742	154777689	14948	+	ENSG00000130826	DKC1	protein_coding	MIR664B	ENSG00000284450	154768596	154768656	Exonic
X	154768528	154768659	132	+	ENSG00000206948	SNORA36A	snoRNA	MIR664B	ENSG00000284450	154768596	154768656	Exonic
X	154835788	155026940	191153	-	ENSG00000185010	F8	protein_coding	MIR1184-1	ENSG00000221533	154887360	154887458	Intronic
8	1755778	1801711	45934	+	ENSG00000182372	CLN8	protein_coding	MIR3674	ENSG00000283858	1801125	1801192	Exonic
8	1763888	1958627	194740	+	ENSG00000283239	KBTBD11-OT1	protein_coding	MIR3674	ENSG00000283858	1801125	1801192	Intronic
8	1763888	1958627	194740	+	ENSG00000283239	KBTBD11-OT1	protein_coding	MIR596	ENSG00000207826	1817231	1817307	Intronic
8	2045040	2165552	120513	+	ENSG00000036448	MYOM2	protein_coding	MIR7160	ENSG00000273593	2076589	2076640	Intronic
8	6618475	6708209	89735	-	ENSG00000249898	MCPH1-AS1	antisense	MIR8055	ENSG00000276580	6622124	6622220	Intronic
8	6708357	6759666	51310	+	ENSG00000155189	AGPAT5	protein_coding	MIR4659A	ENSG00000266038	6745164	6745244	Intronic
8	9002147	9116746	114600	+	ENSG00000104626	ERI1	protein_coding	MIR4660	ENSG00000263407	9048445	9048518	Intronic
8	9555914	9782346	226433	+	ENSG00000173273	TNKS	protein_coding	MIR597	ENSG00000207701	9741672	9741768	Intronic
8	9900064	9905366	5303	-	ENSG00000253230	LINC00599	lincRNA	MIR124-1	ENSG00000284321	9903388	9903472	Exonic
8	10725399	10839847	114449	-	ENSG00000258724	PINX1	protein_coding	MIR1322	ENSG00000283210	10825373	10825443	Intronic
8	10764963	10839884	74922	-	ENSG00000254093	PINX1	protein_coding	MIR1322	ENSG00000283210	10825373	10825443	Intronic
8	10896045	11201366	305322	-	ENSG00000171044	XKR6	protein_coding	MIR598	ENSG00000207600	11035206	11035302	Intronic
8	12721894	12756073	34180	-	ENSG00000154359	LONRF1	protein_coding	MIR3926-1	ENSG00000266206	12727232	12727304	Intronic
8	14089864	15238339	1148476	-	ENSG00000185053	SGCZ	protein_coding	MIR383	ENSG00000199127	14853438	14853510	Intronic
8	17643795	17800917	157123	-	ENSG00000129422	MTUS1	protein_coding	MIR548V	ENSG00000265520	17681578	17681657	Intronic
8	24950955	24957110	6156	-	ENSG00000277586	NEFL	protein_coding	MIR6841	ENSG00000283327	24953796	24953867	Intronic
8	25184723	25418082	233360	+	ENSG00000147459	DOCK5	protein_coding	MIR6876	ENSG00000274988	25345402	25345474	Intronic
8	27311482	27459391	147910	+	ENSG00000120899	PTK2B	protein_coding	MIR6842	ENSG00000273836	27433370	27433434	Intronic
8	27596917	27615031	18115	-	ENSG00000120885	CLU	protein_coding	MIR6843	ENSG00000284280	27610601	27610751	Exonic
8	27701194	27703789	2596	+	ENSG00000279302	AC013643.3	TEC	MIR3622A	ENSG00000284351	27701677	27701759	Exonic
8	27869882	27992727	122846	-	ENSG00000168079	SCARA5	protein_coding	MIR4287	ENSG00000265847	27886039	27886116	Intronic
8	41261958	41309497	47540	-	ENSG00000104332	SFRP1	protein_coding	MIR548AO	ENSG00000263372	41271048	41271143	Intronic
8	41653220	41896762	243543	-	ENSG00000029534	ANK1	protein_coding	MIR486-1	ENSG00000274705	41660441	41660508	Intronic
8	42849637	42897290	47654	-	ENSG00000120925	RNF170	protein_coding	MIR4469	ENSG00000284062	42896197	42896275	SO
8	64373328	64383787	10460	+	ENSG00000254377	MIR124-2HG	lincRNA	MIR124-2	ENSG00000207816	64379149	64379257	Intronic
8	74599775	74823313	223539	+	ENSG00000254349	MIR2052HG	lincRNA	MIR2052	ENSG00000283188	74705693	74705747	Intronic
8	91101832	91219236	117405	+	ENSG00000214954	LRRC69	protein_coding	MIR4661	ENSG00000266194	91205485	91205559	Intronic
8	93915734	93916682	949	-	ENSG00000264448	AC084346.2	lincRNA	MIR378D2	ENSG00000284288	93916022	93916119	Exonic
8	95066808	95073182	6375	-	ENSG00000245080	MIR3150BHG	antisense	MIR3150B	ENSG00000284147	95072911	95072996	SO
8	95071732	95087924	16193	-	ENSG00000254248	AC068189.1	antisense	MIR3150B	ENSG00000284147	95072911	95072996	Intronic
8	94895767	95116455	220689	+	ENSG00000156170	NDUFAF6	protein_coding	MIR3150A	ENSG00000283522	95072914	95072993	Intronic
8	99960936	100131268	170333	-	ENSG00000132554	RGS22	protein_coding	MIR1273A	ENSG00000221753	100023982	100024084	Intronic
8	100685816	100722809	36994	-	ENSG00000070756	PABPC1	protein_coding	MIR7705	ENSG00000284570	100702968	100703024	Exonic
8	103140710	103230305	89596	+	ENSG00000164929	BAALC	protein_coding	MIR3151	ENSG00000265657	103154614	103154689	Intronic
8	116845935	116874866	28932	-	ENSG00000164754	RAD21	protein_coding	MIR3610	ENSG00000283956	116874728	116874800	Exonic
8	123319850	123416350	96501	-	ENSG00000156802	ATAD2	protein_coding	MIR548D1	ENSG00000283172	123348034	123348130	Intronic
8	124488485	124539458	50974	-	ENSG00000147687	TATDN1	protein_coding	MIR6844	ENSG00000284087	124508515	124508576	SO
8	124811226	124857516	46291	-	ENSG00000255491	AC100858.3	lincRNA	MIR4662B	ENSG00000263735	124821978	124822058	Intronic
8	127794533	128101253	306721	+	ENSG00000249859	PVT1	lincRNA	MIR1204	ENSG00000283710	127795962	127796028	Exonic
8	127794533	128101253	306721	+	ENSG00000249859	PVT1	lincRNA	MIR1205	ENSG00000221771	127960633	127960695	Intronic
8	127794533	128101253	306721	+	ENSG00000249859	PVT1	lincRNA	MIR1206	ENSG00000283200	128008898	128008956	Intronic
8	127794533	128101253	306721	+	ENSG00000249859	PVT1	lincRNA	MIR1207	ENSG00000221176	128049152	128049238	Intronic
8	128634199	129683679	1049481	-	ENSG00000229140	CCDC26	lincRNA	MIR3686	ENSG00000263763	129484057	129484142	Intronic
8	129839593	130017129	177537	-	ENSG00000153310	FAM49B	protein_coding	MIR5194	ENSG00000264653	130008334	130008453	Intronic
8	133036724	133103054	66331	-	ENSG00000155926	SLA	protein_coding	MIR7848	ENSG00000276961	133046481	133046581	Intronic
8	140657900	141002216	344317	-	ENSG00000169398	PTK2	protein_coding	MIR151A	ENSG00000254324	140732564	140732653	Intronic
8	143723933	143733801	9869	-	ENSG00000180921	FAM83H	protein_coding	MIR4664	ENSG00000265660	143733083	143733153	Intronic
8	143790920	143815379	24460	-	ENSG00000180900	SCRIB	protein_coding	MIR937	ENSG00000284224	143812957	143813042	SO
8	143833594	143840974	7381	-	ENSG00000185189	NRBP2	protein_coding	MIR6845	ENSG00000284142	143837756	143837816	Exonic
8	143915147	143976734	61588	-	ENSG00000178209	PLEC	protein_coding	MIR661	ENSG00000207574	143945191	143945279	Intronic
8	144051266	144063965	12700	-	ENSG00000178814	OPLAH	protein_coding	MIR6846	ENSG00000277888	144057321	144057380	Intronic
8	144078626	144080647	2022	+	ENSG00000178896	EXOSC4	protein_coding	MIR6847	ENSG00000284200	144079874	144079942	Exonic
8	144262102	144291370	29269	-	ENSG00000261236	BOP1	protein_coding	MIR7112	ENSG00000284054	144262673	144262737	Exonic
8	144314584	144326910	12327	-	ENSG00000185000	DGAT1	protein_coding	MIR6848	ENSG00000284229	144317246	144317315	SO
8	144393229	144409349	16121	-	ENSG00000071894	CPSF1	protein_coding	MIR939	ENSG00000284310	144394149	144394230	Exonic
8	144393229	144409349	16121	-	ENSG00000071894	CPSF1	protein_coding	MIR1234	ENSG00000284139	144400086	144400165	Exonic
8	144393229	144409349	16121	-	ENSG00000071894	CPSF1	protein_coding	MIR6849	ENSG00000283770	144400277	144400345	Exonic
8	144428775	144444444	15670	-	ENSG00000160949	TONSL	protein_coding	MIR6893	ENSG00000276598	144435551	144435619	Intronic
8	144789765	144792587	2823	-	ENSG00000161016	RPL8	protein_coding	MIR6850	ENSG00000283764	144791931	144791991	SO
9	27657	30891	3235	+	ENSG00000227518	AL928970.1	antisense	MIR1302-9	ENSG00000283921	30144	30281	Exonic
9	4792869	4885917	93049	+	ENSG00000120158	RCL1	protein_coding	MIR101-2	ENSG00000199065	4850297	4850375	Intronic
9	17906563	18910950	1004388	+	ENSG00000178031	ADAMTSL1	protein_coding	MIR3152	ENSG00000264638	18573306	18573379	Intronic
9	20341665	20622543	280879	-	ENSG00000171843	MLLT3	protein_coding	MIR4473	ENSG00000263790	20411148	20411238	Intronic
9	20341665	20622543	280879	-	ENSG00000171843	MLLT3	protein_coding	MIR4474	ENSG00000264941	20502265	20502342	Intronic
9	20658309	20995955	337647	+	ENSG00000188352	FOCAD	protein_coding	MIR491	ENSG00000207609	20716105	20716188	Intronic
9	21455642	21559669	104028	-	ENSG00000171889	MIR31HG	sense_overlapping	MIR31	ENSG00000199177	21512115	21512185	Intronic
9	33461441	33473930	12490	-	ENSG00000165271	NOL6	protein_coding	MIR6851	ENSG00000275651	33467869	33467935	Intronic
9	35605305	35610041	4737	+	ENSG00000107140	TESK1	protein_coding	MIR4667	ENSG00000263892	35608094	35608159	Intronic
9	35696948	35732395	35448	-	ENSG00000137076	TLN1	protein_coding	MIR6852	ENSG00000284195	35710676	35710741	SO
9	35732335	35737004	4670	+	ENSG00000107175	CREB3	protein_coding	MIR6853	ENSG00000273945	35732922	35732995	Intronic
9	36833275	37034185	200911	-	ENSG00000196092	PAX5	protein_coding	MIR4540	ENSG00000264922	36864254	36864308	Intronic
9	36833275	37034185	200911	-	ENSG00000196092	PAX5	protein_coding	MIR4476	ENSG00000265368	36893462	36893531	Intronic
9	70529063	71446904	917842	-	ENSG00000083067	TRPM3	protein_coding	MIR204	ENSG00000207935	70809975	70810084	Intronic
9	83968083	83980616	12534	-	ENSG00000165119	HNRNPK	protein_coding	MIR7-1	ENSG00000284179	83969748	83969857	Exonic
9	89311198	89316703	5506	+	ENSG00000123975	CKS2	protein_coding	MIR3153	ENSG00000265112	89312225	89312306	Intronic
9	90020654	90041499	20846	-	ENSG00000227555	MIR4290HG	lincRNA	MIR4290	ENSG00000263967	90023441	90023535	Intronic
9	91563091	91950162	387072	-	ENSG00000169071	ROR2	protein_coding	MIR3910-2	ENSG00000283351	91636264	91636345	Intronic
9	92210207	92293756	83550	-	ENSG00000196305	IARS	protein_coding	MIR3651	ENSG00000281156	92292458	92292547	Intronic
9	92493554	92536655	43102	-	ENSG00000106823	ECM2	protein_coding	MIR4670	ENSG00000264158	92527984	92528058	Intronic
9	93576407	93679587	103181	+	ENSG00000197724	PHF2	protein_coding	MIR548AU	ENSG00000283146	93594841	93594894	Intronic
9	94166289	94200627	34339	+	ENSG00000269946	AL158152.2	lincRNA	MIRLET7A1	ENSG00000199165	94175957	94176036	Intronic
9	94166289	94200627	34339	+	ENSG00000269946	AL158152.2	lincRNA	MIRLET7F1	ENSG00000199072	94176347	94176433	Intronic
9	94166289	94200627	34339	+	ENSG00000269946	AL158152.2	lincRNA	MIRLET7D	ENSG00000199133	94178834	94178920	Intronic
9	94726701	95087218	360518	+	ENSG00000148120	C9orf3	protein_coding	MIR2278	ENSG00000252153	94809962	94810057	Intronic
9	94726701	95087218	360518	+	ENSG00000148120	C9orf3	protein_coding	MIR6081	ENSG00000274115	95065350	95065446	Intronic
9	94726701	95087218	360518	+	ENSG00000148120	C9orf3	protein_coding	MIR23B	ENSG00000207563	95085208	95085304	Intronic
9	94726701	95087218	360518	+	ENSG00000148120	C9orf3	protein_coding	MIR27B	ENSG00000207864	95085445	95085541	Intronic
9	94726701	95087218	360518	+	ENSG00000148120	C9orf3	protein_coding	MIR24-1	ENSG00000284459	95086021	95086088	Exonic
9	98198999	98255721	56723	-	ENSG00000095383	TBC1D2	protein_coding	MIR6854	ENSG00000278412	98229149	98229217	Intronic
9	105993310	106740875	747566	+	ENSG00000234323	LINC01505	lincRNA	MIR8081	ENSG00000277889	106600928	106601022	Intronic
9	109015152	109119945	104794	-	ENSG00000106771	TMEM245	protein_coding	MIR32	ENSG00000207698	109046229	109046298	Intronic
9	111139246	111284836	145591	-	ENSG00000227531	AL162414.1	lincRNA	MIR7702	ENSG00000274263	111271156	111271214	Intronic
9	111896766	111935369	38604	+	ENSG00000148154	UGCG	protein_coding	MIR4668	ENSG00000266315	111932100	111932169	Intronic
9	114155560	114312511	156952	+	ENSG00000196739	COL27A1	protein_coding	MIR455	ENSG00000207726	114209434	114209529	Intronic
9	123109494	123115477	5984	-	ENSG00000236901	MIR600HG	sense_intronic	MIR600	ENSG00000283941	123111546	123111643	Exonic
9	123109500	123268576	159077	-	ENSG00000165209	STRBP	protein_coding	MIR600	ENSG00000283941	123111546	123111643	Intronic
9	123379654	123930152	550499	-	ENSG00000119522	DENND1A	protein_coding	MIR601	ENSG00000207991	123402525	123402603	Intronic
9	123379654	123930152	550499	-	ENSG00000119522	DENND1A	protein_coding	MIR7150	ENSG00000274932	123485529	123485622	Intronic
9	124658467	124698631	40165	+	ENSG00000224020	MIR181A2HG	antisense	MIR181A2	ENSG00000207595	124692442	124692551	Intronic
9	124658467	124698631	40165	+	ENSG00000224020	MIR181A2HG	antisense	MIR181B2	ENSG00000207737	124693710	124693798	Intronic
9	127690098	127690840	743	-	ENSG00000279571	AL162426.1	lincRNA	MIR3911	ENSG00000283874	127690687	127690795	Exonic
9	127690348	127724873	34526	-	ENSG00000187024	PTRH1	protein_coding	MIR3911	ENSG00000283874	127690687	127690795	Exonic
9	127785679	127790787	5109	+	ENSG00000136807	CDK9	protein_coding	MIR3960	ENSG00000283863	127785833	127785923	Exonic
9	127785679	127790787	5109	+	ENSG00000136807	CDK9	protein_coding	MIR2861	ENSG00000284547	127785918	127786007	Exonic
9	127866480	127877743	11264	-	ENSG00000106992	AK1	protein_coding	MIR4672	ENSG00000263979	127869415	127869495	Intronic
9	127867850	127906022	38173	-	ENSG00000257524	AL157935.2	protein_coding	MIR4672	ENSG00000263979	127869415	127869495	Intronic
9	128392007	128393510	1504	-	ENSG00000207955	AL359091.1	lincRNA	MIR219A2	ENSG00000284185	128392618	128392714	Exonic
9	129834698	129881838	47141	+	ENSG00000136878	USP20	protein_coding	MIR6855	ENSG00000276124	129869605	129869671	Intronic
9	130578965	130638352	59388	+	ENSG00000107164	FUBP3	protein_coding	MIR6856	ENSG00000277713	130626297	130626363	Intronic
9	132944000	132991687	47688	+	ENSG00000165702	GFI1B	protein_coding	MIR548AW	ENSG00000263816	132945707	132945771	Intronic
9	133030675	133058503	27829	+	ENSG00000148308	GTF3C5	protein_coding	MIR6877	ENSG00000273932	133051996	133052059	Intronic
9	134317098	134440585	123488	+	ENSG00000186350	RXRA	protein_coding	MIR4669	ENSG00000263897	134379411	134379472	Intronic
9	136494433	136545786	51354	-	ENSG00000148400	NOTCH1	protein_coding	MIR4673	ENSG00000263403	136519568	136519626	Intronic
9	136658856	136672678	13823	+	ENSG00000172889	EGFL7	protein_coding	MIR126	ENSG00000199161	136670602	136670686	Intronic
9	136738167	136748453	10287	-	ENSG00000204003	AL355987.1	protein_coding	MIR6722	ENSG00000278756	136746893	136746970	Intronic
9	136744011	136748528	4518	-	ENSG00000267206	LCN6	protein_coding	MIR6722	ENSG00000278756	136746893	136746970	Intronic
9	136807943	136841187	33245	+	ENSG00000196642	RABL6	protein_coding	MIR4292	ENSG00000265806	136830957	136831023	Intronic
9	136881912	136926607	44696	+	ENSG00000127191	TRAF2	protein_coding	MIR4479	ENSG00000266507	136886733	136886803	Intronic
9	137168758	137170051	1294	-	ENSG00000184709	LRRC26	protein_coding	MIR3621	ENSG00000263697	137169186	137169270	Intronic
9	137168854	137171984	3131	-	ENSG00000261793	AL929554.1	protein_coding	MIR3621	ENSG00000263697	137169186	137169270	Intronic
9	137447573	137459334	11762	-	ENSG00000165802	NSMF	protein_coding	MIR7114	ENSG00000284317	137450026	137450086	Exonic
9	137618963	137870016	251054	+	ENSG00000181090	EHMT1	protein_coding	MIR602	ENSG00000207693	137838419	137838516	Intronic
11	207511	215113	7603	+	ENSG00000177963	RIC8A	protein_coding	MIR6743	ENSG00000283920	209336	209406	Exonic
11	565660	568457	2798	-	ENSG00000247095	MIR210HG	lincRNA	MIR210	ENSG00000199038	568089	568198	Intronic
11	1223066	1262172	39107	+	ENSG00000117983	MUC5B	protein_coding	MIR6744	ENSG00000275669	1256605	1256670	Intronic
11	1852970	1892267	39298	+	ENSG00000130592	LSP1	protein_coding	MIR7847	ENSG00000284594	1880045	1880147	SO
11	1995176	2001470	6295	-	ENSG00000130600	H19	processed_transcript	MIR675	ENSG00000284010	1996759	1996831	Exonic
11	2129112	2149603	20492	-	ENSG00000167244	IGF2	protein_coding	MIR483	ENSG00000207805	2134134	2134209	Intronic
11	2129112	2158658	29547	-	ENSG00000284779	IGF2	protein_coding	MIR483	ENSG00000207805	2134134	2134209	Intronic
11	2132538	2161209	28672	-	ENSG00000129965	INS-IGF2	protein_coding	MIR483	ENSG00000207805	2134134	2134209	Intronic
11	3854527	4093210	238684	+	ENSG00000167323	STIM1	protein_coding	MIR4687	ENSG00000284525	3856062	3856141	Exonic
11	9019498	9138114	118617	-	ENSG00000175356	SCUBE2	protein_coding	MIR5691	ENSG00000264984	9090312	9090379	Intronic
11	10507887	10509189	1303	-	ENSG00000255823	MTRNR2L8	protein_coding	MIR4485	ENSG00000283813	10508270	10508326	Exonic
11	12094008	12359144	265137	+	ENSG00000133816	MICAL2	protein_coding	MIR6124	ENSG00000275373	12163683	12163767	Intronic
11	15966449	16739591	773143	-	ENSG00000110693	SOX6	protein_coding	MIR6073	ENSG00000284094	15969533	15969621	Exonic
11	19350724	20121598	770875	+	ENSG00000166833	NAV2	protein_coding	MIR4486	ENSG00000265210	19575310	19575372	Intronic
11	34915829	35020591	104763	+	ENSG00000110435	PDHX	protein_coding	MIR1343	ENSG00000251862	34941837	34941920	Intronic
11	35943981	36232136	288156	+	ENSG00000179241	LDLRAD3	protein_coding	MIR3973	ENSG00000263389	36010098	36010204	Intronic
11	43556436	43673393	116958	+	ENSG00000283217	AC068205.1	lincRNA	MIR670	ENSG00000211568	43559656	43559753	Intronic
11	43556436	43673393	116958	+	ENSG00000283217	AC068205.1	lincRNA	MIR129-2	ENSG00000199077	43581394	43581483	Intronic
11	43578889	43840030	261142	+	ENSG00000283341	AC068205.2	processed_transcript	MIR129-2	ENSG00000199077	43581394	43581483	Intronic
11	46332905	46380554	47650	+	ENSG00000149091	DGKZ	protein_coding	MIR4688	ENSG00000264102	46376402	46376484	Intronic
11	46396414	46594125	197712	-	ENSG00000110497	AMBRA1	protein_coding	MIR3160-1	ENSG00000265014	46451805	46451889	Intronic
11	46743048	46846308	103261	-	ENSG00000175216	CKAP5	protein_coding	MIR5582	ENSG00000263540	46753125	46753192	Intronic
11	47177525	47186443	8919	-	ENSG00000165912	PACSIN3	protein_coding	MIR6745	ENSG00000275208	47179611	47179737	Intronic
11	47980558	48170841	190284	+	ENSG00000149177	PTPRJ	protein_coding	MIR3161	ENSG00000263693	48096782	48096858	Intronic
11	57638024	57652790	14767	+	ENSG00000254602	AP000662.1	sense_overlapping	MIR130A	ENSG00000208009	57641198	57641286	Intronic
11	59574398	59616144	41747	-	ENSG00000110048	OSBP	protein_coding	MIR3162	ENSG00000264559	59595077	59595158	Intronic
11	60201253	60243088	41836	-	ENSG00000214787	MS4A4E	protein_coding	MIR6503	ENSG00000275344	60209071	60209156	Intronic
11	61768501	61792802	24302	-	ENSG00000134825	TMEM258	protein_coding	MIR611	ENSG00000284108	61792495	61792561	Exonic
11	61799625	61829318	29694	-	ENSG00000149485	FADS1	protein_coding	MIR1908	ENSG00000284416	61815161	61815240	Exonic
11	61873519	61892051	18533	-	ENSG00000221968	FADS3	protein_coding	MIR6746	ENSG00000277892	61878216	61878278	Intronic
11	62559601	62574086	14486	-	ENSG00000254772	EEF1G	protein_coding	MIR6747	ENSG00000276102	62567011	62567071	Intronic
11	62559603	62591531	31929	-	ENSG00000255508	AP002990.1	protein_coding	MIR6747	ENSG00000276102	62567011	62567071	Intronic
11	62787415	62790405	2991	+	ENSG00000185475	TMEM179B	protein_coding	MIR6748	ENSG00000284535	62789815	62789885	Exonic
11	62792123	62806302	14180	-	ENSG00000162231	NXF1	protein_coding	MIR6514	ENSG00000274066	62792702	62792771	Intronic
11	64359148	64372215	13068	+	ENSG00000162302	RPS6KA4	protein_coding	MIR1237	ENSG00000221273	64368602	64368703	Intronic
11	64889560	64893449	3890	-	ENSG00000229719	MIR194-2HG	lincRNA	MIR192	ENSG00000283926	64891137	64891246	Exonic
11	64889560	64893449	3890	-	ENSG00000229719	MIR194-2HG	lincRNA	MIR194-2	ENSG00000284155	64891355	64891439	Exonic
11	64894546	64917248	22703	-	ENSG00000110046	ATG2A	protein_coding	MIR6750	ENSG00000274986	64898363	64898437	Intronic
11	64894546	64917248	22703	-	ENSG00000110046	ATG2A	protein_coding	MIR6749	ENSG00000274314	64902387	64902455	Intronic
11	65014113	65022184	8072	+	ENSG00000213465	ARL2	protein_coding	MIR6879	ENSG00000278851	65018505	65018570	Intronic
11	65014182	65040570	26389	+	ENSG00000273003	ARL2-SNX15	protein_coding	MIR6879	ENSG00000278851	65018505	65018570	Intronic
11	65121780	65134533	12754	-	ENSG00000162298	SYVN1	protein_coding	MIR6751	ENSG00000284489	65129916	65129978	Exonic
11	65422774	65445540	22767	+	ENSG00000245532	NEAT1	lincRNA	MIR612	ENSG00000283791	65444458	65444557	Exonic
11	65615773	65637439	21667	+	ENSG00000197136	PCNX3	protein_coding	MIR4690	ENSG00000266041	65636310	65636369	Intronic
11	65638097	65650930	12834	+	ENSG00000213445	SIPA1	protein_coding	MIR4489	ENSG00000265874	65649192	65649253	Intronic
11	66848233	66958376	110144	-	ENSG00000173599	PC	protein_coding	MIR3163	ENSG00000266423	66934434	66934506	Intronic
11	67006778	67050863	44086	+	ENSG00000173227	SYT12	protein_coding	MIR6860	ENSG00000283326	67045643	67045708	Intronic
11	67483041	67491103	8063	+	ENSG00000110711	AIP	protein_coding	MIR6752	ENSG00000276769	67490245	67490315	Intronic
11	68030617	68036644	6028	+	ENSG00000110717	NDUFS8	protein_coding	MIR7113	ENSG00000284293	68032864	68032922	Exonic
11	68030617	68036644	6028	+	ENSG00000110717	NDUFS8	protein_coding	MIR4691	ENSG00000284435	68033897	68033981	Exonic
11	68039016	68050895	11880	+	ENSG00000110719	TCIRG1	protein_coding	MIR6753	ENSG00000275022	68044794	68044957	Intronic
11	69048897	69162440	113544	+	ENSG00000162341	TPCN2	protein_coding	MIR3164	ENSG00000265539	69083176	69083258	Intronic
11	70270700	70385312	114613	+	ENSG00000131626	PPFIA1	protein_coding	MIR548K	ENSG00000221333	70283955	70284070	Intronic
11	70467856	71252577	784722	-	ENSG00000162105	SHANK2	protein_coding	MIR3664	ENSG00000263744	70872270	70872368	Intronic
11	71453109	71524107	70999	+	ENSG00000172890	NADSYN1	protein_coding	MIR6754	ENSG00000278349	71473503	71473568	Intronic
11	72002864	72080693	77830	-	ENSG00000137497	NUMA1	protein_coding	MIR3165	ENSG00000263742	72072228	72072302	Intronic
11	72576141	72674591	98451	-	ENSG00000186642	PDE2A	protein_coding	MIR139	ENSG00000272036	72615063	72615130	Intronic
11	74397549	74485742	88194	+	ENSG00000254631	AP001372.1	antisense	MIR548AL	ENSG00000264402	74399237	74399333	Intronic
11	74696429	74731385	34957	-	ENSG00000054938	CHRDL2	protein_coding	MIR4696	ENSG00000265902	74720268	74720337	Intronic
11	75264182	75351705	87524	-	ENSG00000137486	ARRB1	protein_coding	MIR326	ENSG00000199090	75335092	75335186	Intronic
11	78652831	79440948	788118	-	ENSG00000149256	TENM4	protein_coding	MIR708	ENSG00000211997	79402022	79402109	Intronic
11	78652831	79440948	788118	-	ENSG00000149256	TENM4	protein_coding	MIR5579	ENSG00000266570	79422169	79422226	Intronic
11	81879851	82718082	838232	-	ENSG00000245832	MIR4300HG	lincRNA	MIR4300	ENSG00000264110	81890741	81890836	Intronic
11	86244544	86278813	34270	+	ENSG00000074266	EED	protein_coding	MIR6755	ENSG00000283744	86278333	86278398	Exonic
11	93729948	93784391	54444	-	ENSG00000166012	TAF1D	protein_coding	MIR1304	ENSG00000284458	93733674	93733764	Exonic
11	94415578	94493908	78331	-	ENSG00000020922	MRE11	protein_coding	MIR548L	ENSG00000221230	94466495	94466580	Intronic
11	101451564	101872562	420999	-	ENSG00000137672	TRPC6	protein_coding	MIR3920	ENSG00000263885	101519820	101519905	Intronic
11	113409615	113475691	66077	-	ENSG00000149295	DRD2	protein_coding	MIR4301	ENSG00000265140	113450023	113450088	Intronic
11	118606440	118658038	51599	+	ENSG00000019144	PHLDB1	protein_coding	MIR6716	ENSG00000284246	118644000	118644079	Exonic
11	119018432	119025454	7023	+	ENSG00000196655	TRAPPC4	protein_coding	MIR3656	ENSG00000283704	119018944	119019012	Exonic
11	119308529	119321521	12993	-	ENSG00000076706	MCAM	protein_coding	MIR6756	ENSG00000284148	119312950	119313012	Exonic
11	122028327	122556721	528395	-	ENSG00000255248	MIR100HG	processed_transcript	MIR125B1	ENSG00000207971	122099757	122099844	Intronic
11	122028327	122556721	528395	-	ENSG00000255248	MIR100HG	processed_transcript	MIRLET7A2	ENSG00000198975	122146522	122146593	Intronic
11	122028327	122556721	528395	-	ENSG00000255248	MIR100HG	processed_transcript	MIR100	ENSG00000207994	122152229	122152308	Intronic
11	126423359	127003460	580102	-	ENSG00000149571	KIRREL3	protein_coding	MIR3167	ENSG00000266215	126988458	126988542	Intronic
11	133896438	133901601	5164	-	ENSG00000280237	MIR4697HG	TEC	MIR4697	ENSG00000284020	133898504	133898581	Exonic
10	274190	689668	415479	-	ENSG00000151240	DIP2C	protein_coding	MIR5699	ENSG00000263511	641689	641778	Intronic
10	6144934	6254644	109711	+	ENSG00000170525	PFKFB3	protein_coding	MIR3155A	ENSG00000263628	6152196	6152277	Intronic
10	12349482	12835545	486064	+	ENSG00000183049	CAMK1D	protein_coding	MIR4480	ENSG00000263584	12578753	12578823	Intronic
10	13643706	14462142	818437	-	ENSG00000151474	FRMD4A	protein_coding	MIR4293	ENSG00000266321	14383200	14383277	Intronic
10	17809344	17911170	101827	+	ENSG00000260314	MRC1	protein_coding	MIR511	ENSG00000207938	17845107	17845193	Intronic
10	21492658	21497262	4605	-	ENSG00000204682	CASC10	protein_coding	MIR1915	ENSG00000222071	21496562	21496641	Intronic
10	23694746	24547848	853103	+	ENSG00000120549	KIAA1217	protein_coding	MIR603	ENSG00000207930	24275685	24275781	Intronic
10	28050993	28334486	283494	-	ENSG00000150054	MPP7	protein_coding	MIR8086	ENSG00000275036	28289258	28289350	Intronic
10	29457338	29736781	279444	-	ENSG00000197321	SVIL	protein_coding	MIR604	ENSG00000207612	29545004	29545097	Intronic
10	29457338	29736781	279444	-	ENSG00000197321	SVIL	protein_coding	MIR938	ENSG00000216035	29602264	29602346	Intronic
10	30309801	30374448	64648	-	ENSG00000107951	MTPAP	protein_coding	MIR7162	ENSG00000284277	30368597	30368665	SO
10	30364410	30374386	9977	-	ENSG00000241621	GOLGA2P6	unprocessed_pseudogene	MIR7162	ENSG00000284277	30368597	30368665	SO
10	35008551	35090642	82092	-	ENSG00000108094	CUL2	protein_coding	MIR3611	ENSG00000266228	35079598	35079680	Intronic
10	35638249	35642278	4030	-	ENSG00000177283	FZD8	protein_coding	MIR4683	ENSG00000284265	35641172	35641252	Exonic
10	45147394	45171389	23996	+	ENSG00000243349	AL358394.2	processed_transcript	MIR3156-1	ENSG00000263476	45164014	45164088	Intronic
10	45156775	45176925	20151	+	ENSG00000230501	ANKRD30BP3	unprocessed_pseudogene	MIR3156-1	ENSG00000263476	45164014	45164088	Intronic
10	48976554	48993046	16493	-	ENSG00000233665	AC060234.2	processed_transcript	MIR4294	ENSG00000264800	48985512	48985587	Intronic
10	50990891	52298350	1307460	+	ENSG00000185532	PRKG1	protein_coding	MIR605	ENSG00000207813	51299573	51299655	Intronic
10	53802771	55627942	1825172	-	ENSG00000150275	PCDH15	protein_coding	MIR548F1	ENSG00000221594	54607874	54607957	Intronic
10	63167221	63521850	354630	-	ENSG00000171988	JMJD1C	protein_coding	MIR1296	ENSG00000221063	63372957	63373048	Intronic
10	65912518	67696169	1783652	-	ENSG00000183230	CTNNA3	protein_coding	MIR7151	ENSG00000276866	67403351	67403410	Intronic
10	68721012	68792377	71366	+	ENSG00000060339	CCAR1	protein_coding	MIR1254-1	ENSG00000221184	68759318	68759414	Intronic
10	71396934	71815947	419014	+	ENSG00000107736	CDH23	protein_coding	MIR7152	ENSG00000274824	71790747	71790800	Intronic
10	72692131	72887694	195564	+	ENSG00000156026	MCU	protein_coding	MIR4676	ENSG00000266719	72721029	72721100	Intronic
10	75431453	76560167	1128715	+	ENSG00000148655	LRMDA	protein_coding	MIR606	ENSG00000207583	75552458	75552553	Intronic
10	85599555	86366493	766939	-	ENSG00000182771	GRID1	protein_coding	MIR346	ENSG00000199104	86264694	86264788	Intronic
10	89579497	89645572	66076	-	ENSG00000152782	PANK1	protein_coding	MIR107	ENSG00000198997	89592747	89592827	Intronic
10	95753206	96090238	337033	-	ENSG00000226688	ENTPD1-AS1	antisense	MIR3157	ENSG00000266407	96064315	96064399	Intronic
10	98383565	98415184	31620	-	ENSG00000119943	PYROXD2	protein_coding	MIR1287	ENSG00000284415	98395218	98395307	SO
10	98416198	98446947	30750	-	ENSG00000107521	HPS1	protein_coding	MIR4685	ENSG00000264610	98431292	98431360	Intronic
10	98457077	99235862	778786	-	ENSG00000172987	HPSE2	protein_coding	MIR6507	ENSG00000274056	98924499	98924568	Intronic
10	100969518	100985871	16354	+	ENSG00000095539	SEMA4G	protein_coding	MIR608	ENSG00000207551	100974985	100975084	Intronic
10	101570560	101609668	39109	+	ENSG00000166171	DPCD	protein_coding	MIR3158-1	ENSG00000263436	101601417	101601497	Intronic
10	103389041	103396492	7452	-	ENSG00000173915	ATP5MD	protein_coding	MIR1307	ENSG00000283867	103394253	103394401	SO
10	104031286	104085957	54672	-	ENSG00000065618	COL17A1	protein_coding	MIR936	ENSG00000283788	104048089	104048186	SO
10	104129888	104232362	102475	-	ENSG00000197748	CFAP43	protein_coding	MIR609	ENSG00000208033	104218789	104218883	Intronic
10	110871795	110900006	28212	+	ENSG00000150593	PDCD4	protein_coding	MIR4680	ENSG00000284482	110898090	110898155	Exonic
10	110919547	111013667	94121	+	ENSG00000108061	SHOC2	protein_coding	MIR548E	ENSG00000221214	110988926	110989013	Intronic
10	112283400	112305035	21636	+	ENSG00000119913	TECTB	protein_coding	MIR6715A	ENSG00000276857	112299612	112299690	Intronic
10	112446998	112818744	371747	+	ENSG00000151532	VTI1A	protein_coding	MIR4295	ENSG00000264763	112634170	112634254	Intronic
10	114120862	114174232	53371	-	ENSG00000165813	CCDC186	protein_coding	MIR2110	ENSG00000284442	114174105	114174179	Exonic
10	117158656	117169059	10404	-	ENSG00000234474	MIR3663HG	lincRNA	MIR3663	ENSG00000266782	117167678	117167774	Intronic
10	119207589	119459742	252154	+	ENSG00000198873	GRK5	protein_coding	MIR4681	ENSG00000265719	119377972	119378043	Intronic
10	122374696	122442602	67907	+	ENSG00000107679	PLEKHA1	protein_coding	MIR3941	ENSG00000265442	122416965	122417067	Intronic
10	124984317	125161170	176854	-	ENSG00000175029	CTBP2	protein_coding	MIR4296	ENSG00000264572	125032783	125032870	Intronic
10	129835283	129963841	128559	-	ENSG00000108001	EBF3	protein_coding	MIR4297	ENSG00000266676	129843299	129843374	Intronic
10	133246478	133247891	1414	-	ENSG00000166917	MIR202HG	antisense	MIR202	ENSG00000284219	133247511	133247620	SO
10	133362480	133373689	11210	-	ENSG00000127884	ECHS1	protein_coding	MIR3944	ENSG00000265395	133371556	133371663	Intronic
12	6963246	6964447	1202	+	ENSG00000257084	MIR200CHG	lincRNA	MIR200C	ENSG00000207713	6963699	6963766	Intronic
12	6963246	6964447	1202	+	ENSG00000257084	MIR200CHG	lincRNA	MIR141	ENSG00000207708	6964097	6964191	Intronic
12	9228533	9275817	47285	-	ENSG00000256069	A2MP1	transcribed_unprocessed_pseudogene	MIR1244-3	ENSG00000283429	9239467	9239551	Intronic
12	12049844	12211084	161241	+	ENSG00000121380	BCL2L14	protein_coding	MIR1244-4	ENSG00000283475	12111952	12112036	Intronic
12	12725917	12829975	104059	+	ENSG00000178878	APOLD1	protein_coding	MIR613	ENSG00000207983	12764649	12764743	Intronic
12	12890782	12917937	27156	+	ENSG00000013588	GPRC5A	protein_coding	MIR614	ENSG00000283759	12915829	12915918	Exonic
12	42312078	42326118	14041	-	ENSG00000139168	ZCRB1	protein_coding	MIR7851	ENSG00000278520	42323700	42323859	Intronic
12	47079603	47236662	157060	+	ENSG00000179715	PCED1B	protein_coding	MIR4698	ENSG00000263838	47187812	47187891	Intronic
12	48105139	48146404	41266	+	ENSG00000152556	PFKM	protein_coding	MIR6505	ENSG00000275770	48132797	48132867	Intronic
12	48653401	48682238	28838	-	ENSG00000139620	KANSL2	protein_coding	MIR1291	ENSG00000281842	48654444	48654530	Intronic
12	48766194	48789037	22844	-	ENSG00000174233	ADCY6	protein_coding	MIR4701	ENSG00000264201	48771975	48772037	Intronic
12	50175788	50283546	107759	-	ENSG00000050405	LIMA1	protein_coding	MIR1293	ENSG00000221604	50234142	50234212	Intronic
12	53046969	53064372	17404	+	ENSG00000111077	TNS2	protein_coding	MIR6757	ENSG00000278108	53056944	53057012	Intronic
12	53985845	54034888	49044	+	ENSG00000273049	AC012531.2	protein_coding	MIR196A2	ENSG00000207924	53991738	53991847	Intronic
12	53990624	54030823	40200	+	ENSG00000197757	HOXC6	protein_coding	MIR196A2	ENSG00000207924	53991738	53991847	Intronic
12	53985845	54034888	49044	+	ENSG00000273049	AC012531.2	protein_coding	MIR615	ENSG00000207571	54033950	54034045	Intronic
12	54016931	54056030	39100	+	ENSG00000198353	HOXC4	protein_coding	MIR615	ENSG00000207571	54033950	54034045	Intronic
12	54017110	54035361	18252	+	ENSG00000273046	HOXC5	processed_transcript	MIR615	ENSG00000207571	54033950	54034045	Intronic
12	54032853	54035358	2506	+	ENSG00000172789	HOXC5	protein_coding	MIR615	ENSG00000207571	54033950	54034045	Intronic
12	54230940	54280133	49194	-	ENSG00000094916	CBX5	protein_coding	MIR3198-2	ENSG00000283803	54231397	54231476	Exonic
12	54276631	54345083	68453	+	ENSG00000258344	AC078778.2	sense_overlapping	MIR148B	ENSG00000199122	54337216	54337314	Intronic
12	54301202	54351849	50648	+	ENSG00000111481	COPZ1	protein_coding	MIR148B	ENSG00000199122	54337216	54337314	Intronic
12	57128493	57213351	84859	+	ENSG00000123384	LRP1	protein_coding	MIR1228	ENSG00000221365	57194504	57194576	Intronic
12	57475445	57517569	42125	+	ENSG00000166986	MARS	protein_coding	MIR6758	ENSG00000284152	57512688	57512750	Exonic
12	57516588	57521737	5150	-	ENSG00000175197	DDIT3	protein_coding	MIR616	ENSG00000208028	57519163	57519259	Intronic
12	57517712	57520480	2769	-	ENSG00000285133	AC022506.1	protein_coding	MIR616	ENSG00000208028	57519163	57519259	Intronic
12	57747727	57756013	8287	-	ENSG00000135446	CDK4	protein_coding	MIR6759	ENSG00000283621	57748618	57748682	Intronic
12	57819927	57846739	26813	-	ENSG00000175215	CTDSP2	protein_coding	MIR26A2	ENSG00000207789	57824609	57824692	Intronic
12	62260338	62417431	157094	+	ENSG00000135655	USP15	protein_coding	MIR6125	ENSG00000284360	62260359	62260454	Exonic
12	62602752	62622213	19462	+	ENSG00000257354	AC048341.1	lincRNA	MIRLET7I	ENSG00000199179	62603686	62603769	Intronic
12	64507001	64697567	190567	+	ENSG00000153179	RASSF3	protein_coding	MIR548C	ENSG00000207546	64622509	64622605	Intronic
12	66188879	66254622	65744	+	ENSG00000090376	IRAK3	protein_coding	MIR6502	ENSG00000284011	66251082	66251157	Exonic
12	78863993	79452008	588016	+	ENSG00000067715	SYT1	protein_coding	MIR1252	ENSG00000221788	79419257	79419321	Intronic
12	80792520	80937925	145406	-	ENSG00000111052	LIN7A	protein_coding	MIR617	ENSG00000207763	80832533	80832629	Intronic
12	80792520	80937925	145406	-	ENSG00000111052	LIN7A	protein_coding	MIR618	ENSG00000208022	80935736	80935833	Intronic
12	80936414	81261205	324792	+	ENSG00000111058	ACSS3	protein_coding	MIR4699	ENSG00000265227	81158388	81158461	Intronic
12	94567124	94650562	83439	-	ENSG00000057704	TMCC3	protein_coding	MIR7844	ENSG00000283818	94571231	94571352	Exonic
12	94834147	94835158	1012	+	ENSG00000216306	KRT19P2	transcribed_processed_pseudogene	MIR492	ENSG00000283998	94834398	94834513	Exonic
12	97430884	97598415	167532	+	ENSG00000255794	RMST	processed_transcript	MIR1251	ENSG00000221479	97491909	97491978	Intronic
12	97430884	97598415	167532	+	ENSG00000255794	RMST	processed_transcript	MIR135A2	ENSG00000207586	97563812	97563911	Intronic
12	103930107	103953645	23539	+	ENSG00000166598	HSP90B1	protein_coding	MIR3652	ENSG00000284503	103930425	103930555	Exonic
12	104455295	104762014	306720	+	ENSG00000171310	CHST11	protein_coding	MIR3922	ENSG00000264295	104591633	104591716	Intronic
12	108628687	108641318	12632	+	ENSG00000257221	AC007569.1	antisense	MIR4496	ENSG00000284388	108635810	108635870	SO
12	108778192	108857590	79399	-	ENSG00000084112	SSH1	protein_coding	MIR619	ENSG00000207622	108836908	108837006	Intronic
12	111034024	111350554	316531	+	ENSG00000111249	CUX2	protein_coding	MIR6760	ENSG00000273700	111304142	111304209	Intronic
12	111766887	111817529	50643	+	ENSG00000111275	ALDH2	protein_coding	MIR6761	ENSG00000274697	111799834	111799905	Intronic
12	112026689	112109022	82334	-	ENSG00000111300	NAA25	protein_coding	MIR3657	ENSG00000266370	112037599	112037715	Intronic
12	112160188	112382439	222252	-	ENSG00000173064	HECTD4	protein_coding	MIR6861	ENSG00000283793	112163258	112163321	SO
12	113157174	113185479	28306	-	ENSG00000123064	DDX54	protein_coding	MIR7106	ENSG00000276908	113159113	113159177	Intronic
12	113221050	113298585	77536	+	ENSG00000186815	TPCN1	protein_coding	MIR6762	ENSG00000274822	113291523	113291608	Intronic
12	115953872	116277719	323848	-	ENSG00000123066	MED13L	protein_coding	MIR620	ENSG00000207967	116148560	116148654	Intronic
12	119685790	119877291	191502	-	ENSG00000122966	CIT	protein_coding	MIR1178	ENSG00000283768	119713634	119713724	Exonic
12	120127203	120194710	67508	-	ENSG00000089154	GCN1	protein_coding	MIR4498	ENSG00000266704	120155434	120155499	Intronic
12	120710435	120723640	13206	+	ENSG00000175970	UNC119B	protein_coding	MIR4700	ENSG00000284143	120723193	120723266	Exonic
12	121429097	121581015	151919	-	ENSG00000089094	KDM2B	protein_coding	MIR7107	ENSG00000284402	121444273	121444352	Intronic
12	122983480	123150015	166536	-	ENSG00000090975	PITPNM2	protein_coding	MIR4304	ENSG00000265526	123010667	123010728	Intronic
12	124324415	124567589	243175	-	ENSG00000196498	NCOR2	protein_coding	MIR6880	ENSG00000275967	124337181	124337242	Intronic
12	128267403	128707915	440513	+	ENSG00000181234	TMEM132C	protein_coding	MIR3612	ENSG00000265635	128294092	128294178	Intronic
12	132489551	132585188	95638	+	ENSG00000112787	FBRSL1	protein_coding	MIR6763	ENSG00000277052	132581997	132582061	Intronic
13	20403666	20525873	122208	-	ENSG00000165475	CRYL1	protein_coding	MIR4499	ENSG00000263978	20433778	20433846	Intronic
13	23979700	24321031	341332	+	ENSG00000273167	AL359736.1	protein_coding	MIR2276	ENSG00000252695	24162416	24162504	Intronic
13	23979805	24307074	327270	+	ENSG00000182957	SPATA13	protein_coding	MIR2276	ENSG00000252695	24162416	24162504	Intronic
13	41566837	41961120	394284	-	ENSG00000102763	VWA8	protein_coding	MIR5006	ENSG00000284584	41568286	41568395	SO
13	49982552	50125720	143169	-	ENSG00000231607	DLEU2	antisense	MIR3613	ENSG00000264864	49996415	49996501	Intronic
13	49982552	50125720	143169	-	ENSG00000231607	DLEU2	antisense	MIR16-1	ENSG00000208006	50048973	50049061	Intronic
13	49982552	50125720	143169	-	ENSG00000231607	DLEU2	antisense	MIR15A	ENSG00000283785	50049119	50049201	SO
13	87427214	87671259	244046	-	ENSG00000228824	MIR4500HG	lincRNA	MIR4500	ENSG00000266052	87618665	87618740	Intronic
13	90230384	90231682	1299	+	ENSG00000224419	KRT18P27	processed_pseudogene	MIR622	ENSG00000283783	90231182	90231277	Exonic
13	91347820	91354579	6760	+	ENSG00000215417	MIR17HG	processed_transcript	MIR17	ENSG00000284536	91350605	91350688	Exonic
13	91347820	91354579	6760	+	ENSG00000215417	MIR17HG	processed_transcript	MIR18A	ENSG00000283815	91350751	91350821	Exonic
13	91347820	91354579	6760	+	ENSG00000215417	MIR17HG	processed_transcript	MIR19A	ENSG00000284204	91350891	91350972	Exonic
13	91347820	91354579	6760	+	ENSG00000215417	MIR17HG	processed_transcript	MIR20A	ENSG00000283762	91351065	91351135	Exonic
13	91347820	91354579	6760	+	ENSG00000215417	MIR17HG	processed_transcript	MIR19B1	ENSG00000284375	91351192	91351278	Exonic
13	91347820	91354579	6760	+	ENSG00000215417	MIR17HG	processed_transcript	MIR92A1	ENSG00000283705	91351314	91351391	Exonic
13	91398607	92873682	1475076	+	ENSG00000179399	GPC5	protein_coding	MIR548AS	ENSG00000263741	92490163	92490220	Intronic
13	92484606	92510094	25489	+	ENSG00000236240	GPC5-IT1	sense_intronic	MIR548AS	ENSG00000263741	92490163	92490220	Intronic
13	96090839	96839562	748724	+	ENSG00000185352	HS6ST3	protein_coding	MIR4501	ENSG00000283487	96427229	96427292	Intronic
13	98142562	98455176	312615	+	ENSG00000152767	FARP1	protein_coding	MIR3170	ENSG00000263399	98208524	98208600	Intronic
13	99200774	99386434	185661	+	ENSG00000134882	UBAC2	protein_coding	MIR623	ENSG00000207719	99356131	99356228	Intronic
13	99606669	99897134	290466	+	ENSG00000125246	CLYBL	protein_coding	MIR4306	ENSG00000263615	99643059	99643149	Intronic
13	101710804	102402457	691654	-	ENSG00000102466	FGF14	protein_coding	MIR2681	ENSG00000265164	101967642	101967746	Intronic
13	101710804	102402457	691654	-	ENSG00000102466	FGF14	protein_coding	MIR4705	ENSG00000264482	102045934	102046004	Intronic
13	107163510	107866735	703226	-	ENSG00000204442	FAM155A	protein_coding	MIR1267	ENSG00000221650	107531171	107531248	Intronic
13	110305812	110513209	207398	+	ENSG00000134871	COL4A2	protein_coding	MIR8073	ENSG00000276765	110340958	110341029	Intronic
13	113208193	113267108	58916	+	ENSG00000139842	CUL4A	protein_coding	MIR8075	ENSG00000277942	113262920	113262999	Intronic
13	114234887	114272723	37837	+	ENSG00000130177	CDC16	protein_coding	MIR548AR	ENSG00000264539	114244505	114244561	Intronic
14	21016763	21070872	54110	-	ENSG00000165795	NDRG2	protein_coding	MIR6717	ENSG00000284122	21023314	21023386	Exonic
14	22946228	22957161	10934	-	ENSG00000092036	HAUS4	protein_coding	MIR4707	ENSG00000284118	22956950	22957029	Exonic
14	22946270	22982258	35989	-	ENSG00000259132	AL132780.3	protein_coding	MIR4707	ENSG00000284118	22956950	22957029	Intronic
14	23381990	23408277	26288	-	ENSG00000197616	MYH6	protein_coding	MIR208A	ENSG00000199157	23388596	23388666	Intronic
14	23412738	23435718	22981	-	ENSG00000092054	MYH7	protein_coding	MIR208B	ENSG00000215991	23417987	23418063	Intronic
14	24143362	24147570	4209	-	ENSG00000100911	PSME2	protein_coding	MIR7703	ENSG00000283856	24143489	24143565	Exonic
14	26836728	27160420	323693	+	ENSG00000258081	AL110292.1	lincRNA	MIR4307	ENSG00000265165	26908642	26908725	Intronic
14	26873133	26914743	41611	+	ENSG00000257612	MIR4307HG	lincRNA	MIR4307	ENSG00000265165	26908642	26908725	Intronic
14	27258717	27845286	586570	-	ENSG00000258932	AL390334.1	transcribed_processed_pseudogene	MIR3171	ENSG00000264657	27633205	27633278	Intronic
14	30893799	31026401	132603	-	ENSG00000196792	STRN3	protein_coding	MIR624	ENSG00000207952	31014646	31014742	Intronic
14	36678431	37172866	494436	-	ENSG00000183032	SLC25A21	protein_coding	MIR4503	ENSG00000266327	36952309	36952391	Intronic
14	50237563	50312548	74986	-	ENSG00000087299	L2HGDH	protein_coding	MIR4504	ENSG00000264712	50299855	50299946	Intronic
14	54842008	54902852	60845	-	ENSG00000131979	GCH1	protein_coding	MIR4308	ENSG00000265432	54878113	54878193	Intronic
14	59595976	59870966	274991	-	ENSG00000139970	RTN1	protein_coding	MIR5586	ENSG00000263629	59646962	59647020	Intronic
14	64084232	64338112	253881	-	ENSG00000140009	ESR2	protein_coding	MIR548H1	ENSG00000221537	64095024	64095125	Intronic
14	64746283	64879907	133625	-	ENSG00000070182	SPTB	protein_coding	MIR7855	ENSG00000284269	64785626	64785686	SO
14	64914485	65061803	147319	+	ENSG00000125954	CHURC1-FNTB	protein_coding	MIR4706	ENSG00000266531	65044688	65044769	Intronic
14	64986720	65062652	75933	+	ENSG00000257365	FNTB	protein_coding	MIR4706	ENSG00000266531	65044688	65044769	Intronic
14	65410592	65744121	333530	+	ENSG00000033170	FUT8	protein_coding	MIR625	ENSG00000207781	65471102	65471186	Intronic
14	71932439	72566529	634091	+	ENSG00000182732	RGS6	protein_coding	MIR7843	ENSG00000273830	72516820	72516898	Intronic
14	74476192	74494177	17986	-	ENSG00000119655	NPC2	protein_coding	MIR4709	ENSG00000283944	74480133	74480204	Exonic
14	75578617	75663214	84598	+	ENSG00000119686	FLVCR2	protein_coding	MIR7641-2	ENSG00000280494	75604209	75604261	Intronic
14	75604173	75604278	106	+	ENSG00000201096	RNA5SP387	rRNA_pseudogene	MIR7641-2	ENSG00000280494	75604209	75604261	Exonic
14	93934153	93976791	42639	-	ENSG00000100628	ASB2	protein_coding	MIR4506	ENSG00000265768	93948226	93948302	Intronic
14	95086228	95158010	71783	-	ENSG00000100697	DICER1	protein_coding	MIR3173	ENSG00000264607	95137919	95137986	Intronic
14	99971449	100144236	172788	+	ENSG00000196405	EVL	protein_coding	MIR342	ENSG00000199082	100109655	100109753	Intronic
14	100238298	100282792	44495	+	ENSG00000100811	YY1	protein_coding	MIR6764	ENSG00000283840	100277357	100277417	Exonic
14	100779410	100861031	81622	+	ENSG00000214548	MEG3	lincRNA	MIR2392	ENSG00000266461	100814491	100814574	Intronic
14	100779410	100861031	81622	+	ENSG00000214548	MEG3	lincRNA	MIR770	ENSG00000211574	100852390	100852487	Exonic
14	100836269	100947194	110926	+	ENSG00000258399	AL117190.1	lincRNA	MIR770	ENSG00000211574	100852390	100852487	Intronic
14	100836269	100947194	110926	+	ENSG00000258399	AL117190.1	lincRNA	MIR493	ENSG00000207989	100869060	100869148	Intronic
14	100836269	100947194	110926	+	ENSG00000258399	AL117190.1	lincRNA	MIR337	ENSG00000199151	100874493	100874585	Intronic
14	100836269	100947194	110926	+	ENSG00000258399	AL117190.1	lincRNA	MIR665	ENSG00000283159	100875033	100875104	Intronic
14	100836269	100947194	110926	+	ENSG00000258399	AL117190.1	lincRNA	MIR431	ENSG00000208001	100881007	100881120	Intronic
14	100836269	100947194	110926	+	ENSG00000258399	AL117190.1	lincRNA	MIR433	ENSG00000207569	100881886	100881978	Intronic
14	100836269	100947194	110926	+	ENSG00000258399	AL117190.1	lincRNA	MIR127	ENSG00000207608	100882979	100883075	Intronic
14	100836269	100947194	110926	+	ENSG00000258399	AL117190.1	lincRNA	MIR432	ENSG00000272458	100884483	100884576	Intronic
14	100836269	100947194	110926	+	ENSG00000258399	AL117190.1	lincRNA	MIR136	ENSG00000207942	100884702	100884783	Intronic
14	100836269	100947194	110926	+	ENSG00000258399	AL117190.1	lincRNA	MIR370	ENSG00000199005	100911139	100911213	Intronic
14	100894770	101038859	144090	+	ENSG00000225746	MEG8	lincRNA	MIR370	ENSG00000199005	100911139	100911213	Intronic
14	100894770	101038859	144090	+	ENSG00000225746	MEG8	lincRNA	MIR379	ENSG00000199088	101022066	101022132	Intronic
14	100894770	101038859	144090	+	ENSG00000225746	MEG8	lincRNA	MIR411	ENSG00000199109	101023325	101023420	Intronic
14	100894770	101038859	144090	+	ENSG00000225746	MEG8	lincRNA	MIR299	ENSG00000207749	101023794	101023856	Intronic
14	100894770	101038859	144090	+	ENSG00000225746	MEG8	lincRNA	MIR380	ENSG00000198982	101025017	101025077	Intronic
14	100894770	101038859	144090	+	ENSG00000225746	MEG8	lincRNA	MIR1197	ENSG00000221745	101025564	101025651	Intronic
14	100894770	101038859	144090	+	ENSG00000225746	MEG8	lincRNA	MIR323A	ENSG00000199069	101025732	101025817	Intronic
14	100894770	101038859	144090	+	ENSG00000225746	MEG8	lincRNA	MIR758	ENSG00000211582	101026020	101026107	Intronic
14	100894770	101038859	144090	+	ENSG00000225746	MEG8	lincRNA	MIR329-1	ENSG00000207761	101026785	101026864	Intronic
14	100894770	101038859	144090	+	ENSG00000225746	MEG8	lincRNA	MIR329-2	ENSG00000207762	101027100	101027183	Intronic
14	100894770	101038859	144090	+	ENSG00000225746	MEG8	lincRNA	MIR494	ENSG00000194717	101029634	101029714	Intronic
14	100894770	101038859	144090	+	ENSG00000225746	MEG8	lincRNA	MIR1193	ENSG00000221036	101030052	101030129	Intronic
14	100894770	101038859	144090	+	ENSG00000225746	MEG8	lincRNA	MIR543	ENSG00000212040	101031987	101032064	Intronic
14	100894770	101038859	144090	+	ENSG00000225746	MEG8	lincRNA	MIR495	ENSG00000207743	101033755	101033836	Intronic
14	101045157	101051795	6639	+	ENSG00000258861	MIR381HG	lincRNA	MIR381	ENSG00000199020	101045920	101045994	Intronic
14	101045157	101051795	6639	+	ENSG00000258861	MIR381HG	lincRNA	MIR487B	ENSG00000207754	101046455	101046538	Intronic
14	101045157	101051795	6639	+	ENSG00000258861	MIR381HG	lincRNA	MIR539	ENSG00000202560	101047321	101047398	Intronic
14	101045157	101051795	6639	+	ENSG00000258861	MIR381HG	lincRNA	MIR889	ENSG00000216099	101047901	101047979	Intronic
14	101045157	101051795	6639	+	ENSG00000258861	MIR381HG	lincRNA	MIR544A	ENSG00000207587	101048658	101048748	Intronic
14	101045157	101051795	6639	+	ENSG00000258861	MIR381HG	lincRNA	MIR655	ENSG00000207646	101049550	101049646	Intronic
14	101064151	101072937	8787	+	ENSG00000223403	MEG9	lincRNA	MIR541	ENSG00000216179	101064495	101064578	Intronic
14	101064151	101072937	8787	+	ENSG00000223403	MEG9	lincRNA	MIR409	ENSG00000199107	101065300	101065378	Intronic
14	101064151	101072937	8787	+	ENSG00000223403	MEG9	lincRNA	MIR412	ENSG00000199012	101065447	101065537	Intronic
14	101064151	101072937	8787	+	ENSG00000223403	MEG9	lincRNA	MIR369	ENSG00000199025	101065598	101065667	Intronic
14	101064151	101072937	8787	+	ENSG00000223403	MEG9	lincRNA	MIR410	ENSG00000199092	101065912	101065991	Exonic
14	101064151	101072937	8787	+	ENSG00000223403	MEG9	lincRNA	MIR656	ENSG00000207959	101066724	101066801	Intronic
14	101552221	101560431	8211	-	ENSG00000258498	DIO3OS	lincRNA	MIR1247	ENSG00000283857	101560287	101560422	Exonic
14	105140981	105168824	27844	-	ENSG00000184916	JAG2	protein_coding	MIR6765	ENSG00000273778	105150778	105150864	Intronic
15	25677273	25865172	187900	-	ENSG00000206190	ATP10A	protein_coding	MIR4715	ENSG00000266517	25848747	25848825	Intronic
15	31001061	31161273	160213	-	ENSG00000134160	TRPM1	protein_coding	MIR211	ENSG00000207702	31065032	31065141	Intronic
15	34379068	34437466	58399	-	ENSG00000175265	GOLGA8A	protein_coding	MIR1233-1	ENSG00000221649	34382069	34382150	Intronic
15	34525207	34588503	63297	-	ENSG00000215252	GOLGA8B	protein_coding	MIR1233-2	ENSG00000221065	34528290	34528371	Intronic
15	35217345	35546193	328849	-	ENSG00000134146	DPH6	protein_coding	MIR3942	ENSG00000265102	35372256	35372364	Intronic
15	36889204	37101299	212096	-	ENSG00000134138	MEIS2	protein_coding	MIR8063	ENSG00000277202	36972821	36972901	Intronic
15	41621224	41773081	151858	+	ENSG00000174197	MGA	protein_coding	MIR626	ENSG00000207766	41691585	41691678	Intronic
15	41848144	41894077	45934	-	ENSG00000137877	SPTBN5	protein_coding	MIR4310	ENSG00000264850	41866495	41866551	Intronic
15	42158701	42208316	49616	-	ENSG00000166887	VPS39	protein_coding	MIR627	ENSG00000207712	42199570	42199666	Intronic
15	43772617	43799133	26517	-	ENSG00000262560	AC018512.1	protein_coding	MIR1282	ENSG00000221792	43793659	43793759	Intronic
15	45430529	45448761	18233	+	ENSG00000166920	C15orf48	protein_coding	MIR147B	ENSG00000284386	45433050	45433129	Exonic
15	50354959	50372202	17244	+	ENSG00000244879	GABPB1-AS1	antisense	MIR4712	ENSG00000284284	50360329	50360410	Exonic
15	51037488	51293912	256425	+	ENSG00000259240	MIR4713HG	lincRNA	MIR4713	ENSG00000266593	51242190	51242264	Intronic
15	51208057	51338610	130554	-	ENSG00000137869	CYP19A1	protein_coding	MIR7973-2	ENSG00000283614	51314032	51314107	Intronic
15	52192322	52295798	103477	-	ENSG00000128833	MYO5C	protein_coding	MIR1266	ENSG00000221052	52277117	52277200	Intronic
15	55340032	55408510	68479	-	ENSG00000260916	CCPG1	protein_coding	MIR628	ENSG00000283891	55372940	55373034	SO
15	55355248	55498360	143113	-	ENSG00000261771	DNAAF4-CCPG1	processed_transcript	MIR628	ENSG00000283891	55372940	55373034	Intronic
15	59132434	59372900	240467	-	ENSG00000157483	MYO1E	protein_coding	MIR2116	ENSG00000253030	59171183	59171262	Intronic
15	62390526	62844631	454106	+	ENSG00000171914	TLN2	protein_coding	MIR190A	ENSG00000211137	62823957	62824041	Intronic
15	64739892	64775587	35696	-	ENSG00000166831	RBPMS2	protein_coding	MIR1272	ENSG00000221033	64762387	64762515	Intronic
15	65658046	65792293	134248	-	ENSG00000174485	DENND4A	protein_coding	MIR4511	ENSG00000264737	65719246	65719332	Intronic
15	66490135	66497813	7679	-	ENSG00000174446	SNAPC5	protein_coding	MIR4512	ENSG00000266589	66496958	66497034	Intronic
15	68778535	68820897	42363	-	ENSG00000140350	ANP32A	protein_coding	MIR4312	ENSG00000265195	68801850	68801925	Intronic
15	70047790	70098176	50387	-	ENSG00000140332	TLE3	protein_coding	MIR629	ENSG00000207965	70079372	70079468	Intronic
15	72474326	72602985	128660	+	ENSG00000166233	ARIH1	protein_coding	MIR630	ENSG00000283798	72587217	72587313	Exonic
15	74409289	74433958	24670	-	ENSG00000138623	SEMA7A	protein_coding	MIR6881	ENSG00000277391	74411357	74411432	Intronic
15	74836116	74843346	7231	-	ENSG00000140474	ULK3	protein_coding	MIR6882	ENSG00000275411	74840642	74840707	Intronic
15	75759501	75762405	2905	-	ENSG00000261043	AC019294.3	lincRNA	MIR4313	ENSG00000284385	75762215	75762315	Exonic
15	80404350	80597937	193588	+	ENSG00000172379	ARNT2	protein_coding	MIR5572	ENSG00000284059	80581103	80581239	SO
15	82925884	83103443	177560	+	ENSG00000259805	AC022558.2	antisense	MIR4515	ENSG00000263643	83067335	83067415	Intronic
15	83022571	83090782	68212	+	ENSG00000260351	AC024270.2	antisense	MIR4515	ENSG00000263643	83067335	83067415	Intronic
15	85380571	85749358	368788	+	ENSG00000170776	AKAP13	protein_coding	MIR7706	ENSG00000284160	85380596	85380662	Exonic
15	85759323	85795030	35708	-	ENSG00000183655	KLHL25	protein_coding	MIR1276	ENSG00000221634	85770496	85770578	Intronic
15	89305198	89334861	29664	-	ENSG00000140521	POLG	protein_coding	MIR6766	ENSG00000275101	89326739	89326810	Intronic
15	89361579	89398487	36909	+	ENSG00000255571	MIR9-3HG	lincRNA	MIR9-3	ENSG00000284329	89368017	89368106	Intronic
15	89830599	89894638	64040	-	ENSG00000157823	AP3S2	protein_coding	MIR5094	ENSG00000264966	89850637	89850721	Intronic
15	89834308	89912882	78575	-	ENSG00000250021	C15orf38-AP3S2	protein_coding	MIR5094	ENSG00000264966	89850637	89850721	Intronic
15	89830599	89894638	64040	-	ENSG00000157823	AP3S2	protein_coding	MIR5009	ENSG00000264796	89883931	89884030	Intronic
15	89834308	89912882	78575	-	ENSG00000250021	C15orf38-AP3S2	protein_coding	MIR5009	ENSG00000264796	89883931	89884030	Intronic
15	90001392	90082206	80815	+	ENSG00000140548	ZNF710	protein_coding	MIR3174	ENSG00000265871	90006755	90006841	Intronic
15	92883413	92949230	65818	+	ENSG00000279765	AC013394.1	protein_coding	MIR3175	ENSG00000284324	92904399	92904475	Intronic
15	92900189	93028005	127817	+	ENSG00000173575	CHD2	protein_coding	MIR3175	ENSG00000284324	92904399	92904475	SO
15	96325938	96340263	14326	+	ENSG00000185551	NR2F2	protein_coding	MIR1469	ENSG00000283888	96333261	96333307	Exonic
15	98648539	98964530	315992	+	ENSG00000140443	IGF1R	protein_coding	MIR4714	ENSG00000264480	98784426	98784502	Intronic
15	101959848	101961408	1561	-	ENSG00000259553	AC140725.1	lincRNA	MIR1302-10	ENSG00000284557	101960459	101960596	SO
15	101961603	101976543	14941	+	ENSG00000185596	WASH3P	transcribed_unprocessed_pseudogene	MIR6859-3	ENSG00000275449	101973524	101973591	Intronic
16	14381	18068	3688	-	ENSG00000234769	WASH4P	unprocessed_pseudogene	MIR6859-4	ENSG00000278739	17052	17119	Intronic
16	527717	554636	26920	+	ENSG00000103326	CAPN15	protein_coding	MIR5587	ENSG00000266124	535316	535368	Intronic
16	527717	554636	26920	+	ENSG00000103326	CAPN15	protein_coding	MIR3176	ENSG00000266235	543277	543366	Intronic
16	1706183	1770317	64135	+	ENSG00000138834	MAPK8IP3	protein_coding	MIR3177	ENSG00000265820	1734985	1735066	Intronic
16	2088710	2135898	47189	-	ENSG00000008710	PKD1	protein_coding	MIR1225	ENSG00000221656	2090195	2090284	Intronic
16	2088710	2135898	47189	-	ENSG00000008710	PKD1	protein_coding	MIR6511B1	ENSG00000284008	2106669	2106753	SO
16	2268155	2273418	5264	+	ENSG00000260778	AC009065.4	lincRNA	MIR3677	ENSG00000266643	2270713	2270772	Intronic
16	2268155	2273418	5264	+	ENSG00000260778	AC009065.4	lincRNA	MIR940	ENSG00000284346	2271747	2271840	Exonic
16	2429394	2458854	29461	+	ENSG00000162063	CCNF	protein_coding	MIR6767	ENSG00000283180	2445392	2445457	Intronic
16	2460080	2464963	4884	+	ENSG00000162062	TEDC2	protein_coding	MIR6768	ENSG00000274805	2463967	2464038	Intronic
16	4616493	4690974	74482	+	ENSG00000102858	MGRN1	protein_coding	MIR6769A	ENSG00000276641	4671318	4671390	Intronic
16	5239802	7713338	2473537	+	ENSG00000078328	RBFOX1	protein_coding	MIR8065	ENSG00000273648	5632467	5632566	Intronic
16	14301389	14331067	29679	+	ENSG00000262454	MIR193BHG	lincRNA	MIR193B	ENSG00000207639	14303967	14304049	Intronic
16	14301389	14331067	29679	+	ENSG00000262454	MIR193BHG	lincRNA	MIR365A	ENSG00000199130	14309285	14309371	Intronic
16	14901499	14902174	676	+	ENSG00000257264	AC136443.3	lincRNA	MIR3179-1	ENSG00000284305	14901508	14901591	Exonic
16	14911551	14935708	24158	+	ENSG00000183458	AC138932.1	transcribed_unprocessed_pseudogene	MIR6511A1	ENSG00000275259	14925937	14926003	Intronic
16	14922802	14952060	29259	+	ENSG00000183426	NPIPA1	protein_coding	MIR6511A1	ENSG00000275259	14925937	14926003	Intronic
16	14911551	14935708	24158	+	ENSG00000183458	AC138932.1	transcribed_unprocessed_pseudogene	MIR6770-1	ENSG00000278265	14930820	14930879	Intronic
16	14922802	14952060	29259	+	ENSG00000183426	NPIPA1	protein_coding	MIR6770-1	ENSG00000278265	14930820	14930879	Intronic
16	15125242	15154564	29323	-	ENSG00000250251	PKD1P6	transcribed_unprocessed_pseudogene	MIR6511B2	ENSG00000283346	15134075	15134145	Intronic
16	15594386	15643166	48781	-	ENSG00000166783	MARF1	protein_coding	MIR6506	ENSG00000284184	15611030	15611095	Exonic
16	15643267	15726353	83087	+	ENSG00000072864	NDE1	protein_coding	MIR484	ENSG00000283736	15643294	15643372	Exonic
16	16310341	16334190	23850	+	ENSG00000244257	PKD1P1	unprocessed_pseudogene	MIR6511A2	ENSG00000278221	16324588	16324654	Intronic
16	16317444	16350590	33147	+	ENSG00000183889	PKD1P1	protein_coding	MIR6511A2	ENSG00000278221	16324588	16324654	Intronic
16	16310341	16334190	23850	+	ENSG00000244257	PKD1P1	unprocessed_pseudogene	MIR6770-2	ENSG00000277698	16329305	16329364	Intronic
16	16317444	16350590	33147	+	ENSG00000183889	PKD1P1	protein_coding	MIR6770-2	ENSG00000277698	16329305	16329364	Intronic
16	16356224	16377507	21284	+	ENSG00000227827	AC138969.1	unprocessed_pseudogene	MIR6511A3	ENSG00000276311	16368876	16368942	Intronic
16	18318008	18344283	26276	-	ENSG00000285628	AC126755.7	processed_transcript	MIR6511A4	ENSG00000273613	18344013	18344079	Intronic
16	18334400	18352476	18077	-	ENSG00000205746	AC126755.1	transcribed_unprocessed_pseudogene	MIR6511A4	ENSG00000273613	18344013	18344079	Intronic
16	18374521	18401940	27420	-	ENSG00000254681	PKD1P5	transcribed_unprocessed_pseudogene	MIR6770-3	ENSG00000275391	18379351	18379410	Intronic
16	18417325	18562211	144887	-	ENSG00000185164	NOMO2	protein_coding	MIR3670-4	ENSG00000274025	18488301	18488365	Intronic
16	18417325	18562211	144887	-	ENSG00000185164	NOMO2	protein_coding	MIR3179-4	ENSG00000277014	18494493	18494576	Intronic
16	21446683	21520444	73762	-	ENSG00000180747	SMG1P3	transcribed_unprocessed_pseudogene	MIR3680-1	ENSG00000265462	21506049	21506135	Intronic
16	23835946	24220611	384666	+	ENSG00000166501	PRKCB	protein_coding	MIR1273H	ENSG00000274466	24203116	24203231	Intronic
16	25692026	26137688	445663	+	ENSG00000182601	HS3ST4	protein_coding	MIR548W	ENSG00000265005	26025237	26025310	Intronic
16	25787987	26042347	254361	+	ENSG00000285882	AC093516.1	sense_intronic	MIR548W	ENSG00000265005	26025237	26025310	Intronic
16	28379579	28403879	24301	-	ENSG00000205609	EIF3CL	protein_coding	MIR6862-1	ENSG00000275429	28390982	28391051	Intronic
16	28688558	28735730	47173	+	ENSG00000184110	EIF3C	protein_coding	MIR6862-2	ENSG00000278340	28724252	28724321	Intronic
16	28842411	28846408	3998	-	ENSG00000178952	TUFM	protein_coding	MIR4721	ENSG00000283845	28843919	28844007	SO
16	28950807	28967097	16291	+	ENSG00000176953	NFATC2IP	protein_coding	MIR4517	ENSG00000284541	28958583	28958661	Exonic
16	30472658	30523185	50528	+	ENSG00000005844	ITGAL	protein_coding	MIR4518	ENSG00000266305	30503919	30504001	Intronic
16	30833626	30894960	61335	-	ENSG00000099385	BCL7C	protein_coding	MIR4519	ENSG00000265991	30875266	30875323	Intronic
16	30875222	30895220	19999	+	ENSG00000260083	MIR762HG	antisense	MIR762	ENSG00000211591	30893903	30893985	Intronic
16	50246137	50318135	71999	+	ENSG00000121281	ADCY7	protein_coding	MIR6771	ENSG00000274969	50292616	50292675	Intronic
16	50742050	50801935	59886	+	ENSG00000083799	CYLD	protein_coding	MIR3181	ENSG00000264947	50742305	50742377	Intronic
16	56191347	56357457	166111	+	ENSG00000087258	GNAO1	protein_coding	MIR3935	ENSG00000265281	56245520	56245623	Intronic
16	56865207	56915850	50644	+	ENSG00000070915	SLC12A3	protein_coding	MIR6863	ENSG00000283471	56904264	56904353	Intronic
16	57758217	57863053	104837	-	ENSG00000140859	KIFC3	protein_coding	MIR6772	ENSG00000274816	57772289	57772352	Intronic
16	68229111	68238102	8992	-	ENSG00000103067	ESRP2	protein_coding	MIR6773	ENSG00000284259	68233426	68233499	Exonic
16	69762306	69941741	179436	+	ENSG00000198373	WWP2	protein_coding	MIR140	ENSG00000208017	69933081	69933180	Intronic
16	76736342	76928169	191828	+	ENSG00000259995	AC106729.1	lincRNA	MIR4719	ENSG00000266426	76868936	76869019	Intronic
16	81314947	81390884	75938	+	ENSG00000261609	GAN	protein_coding	MIR4720	ENSG00000284473	81385018	81385093	Exonic
16	81445170	81711762	266593	+	ENSG00000153815	CMIP	protein_coding	MIR7854	ENSG00000277255	81533902	81533966	Intronic
16	81445170	81711762	266593	+	ENSG00000153815	CMIP	protein_coding	MIR6504	ENSG00000275109	81611348	81611408	Intronic
16	82626803	83800640	1173838	+	ENSG00000140945	CDH13	protein_coding	MIR8058	ENSG00000277387	82688931	82689019	Intronic
16	82626803	83800640	1173838	+	ENSG00000140945	CDH13	protein_coding	MIR3182	ENSG00000263785	83508346	83508408	Intronic
16	85690084	85751129	61046	-	ENSG00000154102	C16orf74	protein_coding	MIR1910	ENSG00000283416	85741621	85741700	Intronic
16	85898803	85922609	23807	+	ENSG00000140968	IRF8	protein_coding	MIR6774	ENSG00000274134	85918347	85918416	Intronic
16	87830023	87869488	39466	-	ENSG00000103257	SLC7A5	protein_coding	MIR6775	ENSG00000278598	87834592	87834660	Intronic
16	88453317	88537016	83700	+	ENSG00000179588	ZFPM1	protein_coding	MIR5189	ENSG00000263456	88468918	88469031	Intronic
16	88715338	88785220	69883	-	ENSG00000103335	PIEZO1	protein_coding	MIR4722	ENSG00000284585	88716278	88716337	Intronic
17	1003518	1229738	226221	-	ENSG00000159842	ABR	protein_coding	MIR3183	ENSG00000264429	1022476	1022559	Intronic
17	1711493	1717174	5682	-	ENSG00000186594	MIR22HG	lincRNA	MIR22	ENSG00000283824	1713903	1713987	Exonic
17	2689386	2712663	23278	-	ENSG00000132361	CLUH	protein_coding	MIR6776	ENSG00000273606	2692861	2692919	Intronic
17	2724411	2749504	25094	-	ENSG00000261963	CCDC92B	unitary_pseudogene	MIR1253	ENSG00000221200	2748078	2748182	Intronic
17	4967992	4987652	19661	-	ENSG00000108509	CAMTA2	protein_coding	MIR6864	ENSG00000274300	4969702	4969771	Intronic
17	4967992	4987652	19661	-	ENSG00000108509	CAMTA2	protein_coding	MIR6865	ENSG00000278517	4970086	4970150	Intronic
17	6651718	6693202	41485	+	ENSG00000256806	C17orf100	protein_coding	MIR4520-2	ENSG00000283301	6655449	6655502	Intronic
17	6985494	7019414	33921	-	ENSG00000267047	AC040977.2	antisense	MIR195	ENSG00000284112	7017615	7017701	Intronic
17	7015818	7019659	3842	-	ENSG00000267532	MIR497HG	antisense	MIR195	ENSG00000284112	7017615	7017701	Exonic
17	6985494	7019414	33921	-	ENSG00000267047	AC040977.2	antisense	MIR497	ENSG00000284027	7017911	7018022	Intronic
17	7015818	7019659	3842	-	ENSG00000267532	MIR497HG	antisense	MIR497	ENSG00000284027	7017911	7018022	Exonic
17	8140472	8156506	16035	-	ENSG00000179094	PER1	protein_coding	MIR6883	ENSG00000284117	8144994	8145071	Exonic
17	12020824	12143830	123007	+	ENSG00000065559	MAP2K4	protein_coding	MIR744	ENSG00000266297	12081899	12081996	Intronic
17	13495689	13601927	106239	-	ENSG00000153976	HS3ST3A1	protein_coding	MIR548H3	ENSG00000221698	13543529	13543646	Intronic
17	15229777	15265357	35581	-	ENSG00000109099	PMP22	protein_coding	MIR4731	ENSG00000265110	15251627	15251696	Intronic
17	16217191	16351797	134607	+	ENSG00000108474	PIGL	protein_coding	MIR1288	ENSG00000221355	16282014	16282088	Intronic
17	17810399	17837002	26604	-	ENSG00000072310	SREBF1	protein_coding	MIR6777	ENSG00000274111	17813480	17813545	Intronic
17	17810399	17837002	26604	-	ENSG00000072310	SREBF1	protein_coding	MIR33B	ENSG00000207839	17813836	17813931	Intronic
17	18327860	18363563	35704	-	ENSG00000176974	SHMT1	protein_coding	MIR6778	ENSG00000283772	18340814	18340886	Exonic
17	19337554	19378193	40640	-	ENSG00000108641	B9D1	protein_coding	MIR1180	ENSG00000221540	19344506	19344574	Intronic
17	28357581	28363683	6103	+	ENSG00000244045	TMEM199	protein_coding	MIR4723	ENSG00000284532	28360654	28360734	Exonic
17	28357647	28381697	24051	+	ENSG00000258924	AC002094.1	processed_transcript	MIR4723	ENSG00000284532	28360654	28360734	Intronic
17	28861072	28861966	895	-	ENSG00000264066	AC024267.1	lincRNA	MIR451A	ENSG00000284565	28861369	28861440	Exonic
17	28861072	28861966	895	-	ENSG00000264066	AC024267.1	lincRNA	MIR144	ENSG00000283819	28861533	28861618	Exonic
17	28861072	28861966	895	-	ENSG00000264066	AC024267.1	lincRNA	MIR4732	ENSG00000284085	28861655	28861730	Exonic
17	29352069	29404105	52037	+	ENSG00000266111	AC068025.2	lincRNA	MIR4523	ENSG00000284162	29390662	29390730	Intronic
17	29390464	29551904	161441	+	ENSG00000160551	TAOK1	protein_coding	MIR4523	ENSG00000284162	29390662	29390730	Exonic
17	30115521	30186475	70955	+	ENSG00000126653	NSRP1	protein_coding	MIR423	ENSG00000283935	30117079	30117172	Exonic
17	30090366	30117497	27132	-	ENSG00000265394	AC104984.2	antisense	MIR3184	ENSG00000284399	30117086	30117160	Intronic
17	30117079	30117172	94	-	ENSG00000266919	AC104984.5	sense_intronic	MIR3184	ENSG00000284399	30117086	30117160	Exonic
17	31090787	31095450	4664	-	ENSG00000264107	AC138207.2	antisense	MIR4733	ENSG00000265444	31094350	31094425	Intronic
17	31391624	31538217	146594	+	ENSG00000131242	RAB11FIP4	protein_coding	MIR4724	ENSG00000284424	31534883	31534971	Exonic
17	31571142	31575659	4518	+	ENSG00000228768	AC003101.1	lincRNA	MIR4725	ENSG00000265976	31575269	31575358	Intronic
17	31571142	31575659	4518	+	ENSG00000228768	AC003101.1	lincRNA	MIR365B	ENSG00000283978	31575411	31575521	SO
17	32324431	32360700	36270	+	ENSG00000265794	AC005899.4	processed_transcript	MIR632	ENSG00000283774	32350109	32350202	Intronic
17	36948875	37056871	107997	+	ENSG00000275700	AATF	protein_coding	MIR2909	ENSG00000276326	37033745	37033813	Intronic
17	37609739	37643464	33726	-	ENSG00000278053	DDX52	protein_coding	MIR378J	ENSG00000274620	37614931	37615039	Intronic
17	38705542	38729803	24262	+	ENSG00000275023	MLLT6	protein_coding	MIR4726	ENSG00000273627	38719691	38719748	Intronic
17	38869859	38921770	51912	+	ENSG00000002834	LASP1	protein_coding	MIR6779	ENSG00000277057	38914979	38915042	Intronic
17	39687914	39730426	42513	+	ENSG00000141736	ERBB2	protein_coding	MIR4728	ENSG00000265178	39726495	39726561	Intronic
17	40019097	40061215	42119	-	ENSG00000008838	MED24	protein_coding	MIR6884	ENSG00000283721	40026332	40026409	Exonic
17	40140318	40172183	31866	+	ENSG00000108349	CASC3	protein_coding	MIR6866	ENSG00000284144	40161933	40162001	Exonic
17	40177010	40195656	18647	+	ENSG00000108352	RAPGEFL1	protein_coding	MIR6867	ENSG00000274621	40193597	40193663	Intronic
17	41513743	41522529	8787	-	ENSG00000171346	KRT15	protein_coding	MIR6510	ENSG00000283796	41517164	41517217	SO
17	42458844	42522611	63768	+	ENSG00000033627	ATP6V0A1	protein_coding	MIR548AT	ENSG00000264314	42494773	42494830	Intronic
17	42458844	42522611	63768	+	ENSG00000033627	ATP6V0A1	protein_coding	MIR5010	ENSG00000283929	42514188	42514307	SO
17	42700275	42745049	44775	-	ENSG00000108799	EZH1	protein_coding	MIR6780A	ENSG00000275273	42708084	42708151	Intronic
17	42810134	42833350	23217	-	ENSG00000126581	BECN1	protein_coding	MIR6781	ENSG00000278447	42823880	42823943	Intronic
17	43444707	43451200	6494	+	ENSG00000267151	MIR2117HG	lincRNA	MIR2117	ENSG00000284344	43444806	43444885	Exonic
17	44205033	44221626	16594	-	ENSG00000108312	UBTF	protein_coding	MIR6782	ENSG00000275107	44207771	44207839	Intronic
17	44924709	44947711	23003	-	ENSG00000186185	KIF18B	protein_coding	MIR6783	ENSG00000278223	44934618	44934681	Intronic
17	45108967	45133354	24388	-	ENSG00000161714	PLCD3	protein_coding	MIR6784	ENSG00000277249	45114367	45114433	Intronic
17	45435900	45490749	54850	-	ENSG00000225190	PLEKHM1	protein_coding	MIR4315-1	ENSG00000284055	45475363	45475435	Exonic
17	46923075	46975524	52450	+	ENSG00000108433	GOSR2	protein_coding	MIR5089	ENSG00000264999	46973017	46973100	Intronic
17	46923133	47049932	126800	+	ENSG00000262633	AC005670.2	protein_coding	MIR5089	ENSG00000264999	46973017	46973100	Intronic
17	48026167	48038030	11864	-	ENSG00000005243	COPZ2	protein_coding	MIR152	ENSG00000207947	48037161	48037247	Intronic
17	48133440	48430275	296836	-	ENSG00000141293	SKAP1	protein_coding	MIR1203	ENSG00000221739	48156427	48156511	Intronic
17	48548870	48604912	56043	-	ENSG00000120093	HOXB3	protein_coding	MIR10A	ENSG00000284038	48579838	48579947	Intronic
17	48575513	48580111	4599	-	ENSG00000182742	HOXB4	protein_coding	MIR10A	ENSG00000284038	48579838	48579947	Exonic
17	48579630	48582259	2630	-	ENSG00000257178	AC103702.1	sense_intronic	MIR10A	ENSG00000284038	48579838	48579947	Exonic
17	48607227	48633572	26346	-	ENSG00000260027	HOXB7	protein_coding	MIR196A1	ENSG00000210741	48632490	48632559	Intronic
17	49495293	49515017	19725	+	ENSG00000064300	NGFR	protein_coding	MIR6165	ENSG00000277478	49510817	49510900	Intronic
17	56836387	56914080	77694	-	ENSG00000121060	TRIM25	protein_coding	MIR3614	ENSG00000284542	56891270	56891355	Exonic
17	58330884	58332508	1625	-	ENSG00000265206	AC004687.1	antisense	MIR142	ENSG00000284353	58331232	58331318	Exonic
17	59109951	59155269	45319	-	ENSG00000182628	SKA2	protein_coding	MIR454	ENSG00000211514	59137758	59137872	Intronic
17	59109951	59155269	45319	-	ENSG00000182628	SKA2	protein_coding	MIR301A	ENSG00000207996	59151136	59151221	Intronic
17	59331689	59401729	70041	+	ENSG00000175155	YPEL2	protein_coding	MIR4729	ENSG00000263857	59366083	59366154	Intronic
17	59707192	59842255	135064	+	ENSG00000062716	VMP1	protein_coding	MIR21	ENSG00000284190	59841266	59841337	Exonic
17	64499616	64508199	8584	-	ENSG00000108654	DDX5	protein_coding	MIR3064	ENSG00000284564	64500774	64500839	Exonic
17	64499616	64508199	8584	-	ENSG00000108654	DDX5	protein_coding	MIR5047	ENSG00000284368	64501214	64501313	Exonic
17	64779259	64837154	57896	-	ENSG00000214176	PLEKHM1P1	transcribed_unprocessed_pseudogene	MIR4315-2	ENSG00000284172	64822030	64822102	Exonic
17	66302636	66810743	508108	+	ENSG00000154229	PRKCA	protein_coding	MIR634	ENSG00000207943	66787072	66787168	Intronic
17	67377281	67697261	319981	+	ENSG00000154217	PITPNC1	protein_coding	MIR548AA2	ENSG00000207688	67471489	67471585	Intronic
17	68420948	68457513	36566	-	ENSG00000070540	WIPI1	protein_coding	MIR635	ENSG00000207561	68424451	68424548	Intronic
17	69078702	69141888	63187	-	ENSG00000154262	ABCA6	protein_coding	MIR4524A	ENSG00000283385	69099564	69099632	Intronic
17	75441159	75500090	58932	+	ENSG00000177728	TMEM94	protein_coding	MIR6785	ENSG00000284595	75498548	75498628	Exonic
17	75776434	75785893	9460	-	ENSG00000132475	H3F3B	protein_coding	MIR4738	ENSG00000283853	75784521	75784607	Exonic
17	76081017	76121576	40560	-	ENSG00000182473	EXOC7	protein_coding	MIR6868	ENSG00000275360	76098019	76098076	Intronic
17	76734115	76737374	3260	-	ENSG00000161547	SRSF2	protein_coding	MIR636	ENSG00000283805	76736450	76736548	Exonic
17	77086716	77099902	13187	+	ENSG00000234912	SNHG20	sense_overlapping	MIR6516	ENSG00000284250	77089417	77089497	Exonic
17	77088749	77217101	128353	+	ENSG00000129657	SEC14L1	protein_coding	MIR6516	ENSG00000284250	77089417	77089497	Intronic
17	80036632	80100613	63982	+	ENSG00000141519	CCDC40	protein_coding	MIR1268B	ENSG00000265561	80098828	80098877	Intronic
17	80415165	80438086	22922	+	ENSG00000173818	ENDOV	protein_coding	MIR4730	ENSG00000264961	80419418	80419493	Intronic
17	81117295	81166077	48783	-	ENSG00000181409	AATK	protein_coding	MIR657	ENSG00000207736	81125276	81125373	Intronic
17	81117295	81166077	48783	-	ENSG00000181409	AATK	protein_coding	MIR338	ENSG00000283604	81125883	81125949	Intronic
17	81117295	81166077	48783	-	ENSG00000181409	AATK	protein_coding	MIR1250	ENSG00000221025	81133196	81133308	Intronic
17	81683326	81703138	19813	+	ENSG00000185359	HGS	protein_coding	MIR6786	ENSG00000277784	81693757	81693869	Intronic
17	82228397	82261129	32733	+	ENSG00000141526	SLC16A3	protein_coding	MIR6787	ENSG00000284574	82236668	82236728	Exonic
17	82654973	82698728	43756	-	ENSG00000141542	RAB40B	protein_coding	MIR4525	ENSG00000266107	82668233	82668307	Intronic
18	3878180	3897069	18890	+	ENSG00000263724	DLGAP1-AS3	antisense	MIR6718	ENSG00000275518	3885353	3885432	Intronic
18	5748819	5876328	127510	+	ENSG00000261738	MIR3976HG	lincRNA	MIR3976	ENSG00000272380	5840695	5840833	Intronic
18	5954706	6415237	460532	-	ENSG00000154655	L3MBTL4	protein_coding	MIR4317	ENSG00000283532	6374361	6374425	Intronic
18	10666483	11148762	482280	-	ENSG00000154864	PIEZO2	protein_coding	MIR6788	ENSG00000274838	10759584	10759649	Intronic
18	13217498	13652755	435258	+	ENSG00000168675	LDLRAD4	protein_coding	MIR5190	ENSG00000266146	13459947	13460026	Intronic
18	13217498	13652755	435258	+	ENSG00000168675	LDLRAD4	protein_coding	MIR4526	ENSG00000263527	13611114	13611200	Intronic
18	14728272	14852738	124467	+	ENSG00000180777	ANKRD30B	protein_coding	MIR3156-2	ENSG00000265499	14830166	14830242	Intronic
18	21825487	21831410	5924	-	ENSG00000265142	MIR133A1HG	antisense	MIR133A1	ENSG00000283927	21825698	21825785	Exonic
18	21825487	21831410	5924	-	ENSG00000265142	MIR133A1HG	antisense	MIR1-2	ENSG00000284453	21829004	21829088	Exonic
18	22798261	23026488	228228	+	ENSG00000101773	RBBP8	protein_coding	MIR4741	ENSG00000284331	22933349	22933438	Exonic
18	26454910	26657401	202492	-	ENSG00000134504	KCTD1	protein_coding	MIR8057	ENSG00000276221	26591467	26591535	Intronic
18	35581117	35711834	130718	+	ENSG00000141429	GALNT1	protein_coding	MIR3975	ENSG00000283514	35591737	35591806	Intronic
18	37565281	37762131	196851	+	ENSG00000285940	AC009899.1	antisense	MIR4318	ENSG00000266530	37657135	37657215	Intronic
18	39206924	39800318	593395	-	ENSG00000267374	AC016205.1	lincRNA	MIR924	ENSG00000283615	39622123	39622175	Intronic
18	39206924	39800318	593395	-	ENSG00000267374	AC016205.1	lincRNA	MIR5583-2	ENSG00000283645	39676719	39676777	Intronic
18	47285725	47594550	308826	+	ENSG00000267761	MIR4527HG	lincRNA	MIR4527	ENSG00000266582	47380496	47380565	Intronic
18	48539046	48863217	324172	+	ENSG00000134030	CTIF	protein_coding	MIR4743	ENSG00000266276	48670600	48670668	Intronic
18	49041474	49461347	419874	-	ENSG00000141627	DYM	protein_coding	MIR4744	ENSG00000263849	49049687	49049768	Intronic
18	49487339	49491878	4540	+	ENSG00000265496	AC100778.3	antisense	MIR1539	ENSG00000284239	49487373	49487422	Exonic
18	49822813	50195093	372281	-	ENSG00000167306	MYO5B	protein_coding	MIR4320	ENSG00000283343	50126499	50126563	Intronic
18	52340172	53535903	1195732	+	ENSG00000187323	DCC	protein_coding	MIR4528	ENSG00000263872	53237101	53237190	Intronic
18	55452533	55482940	30408	+	ENSG00000267028	TCF4-AS1	antisense	MIR4529	ENSG00000264571	55479221	55479298	Intronic
18	58446275	58453766	7492	+	ENSG00000267391	MIR122HG	lincRNA	MIR122	ENSG00000284440	58451074	58451158	Exonic
18	72742314	72868146	125833	-	ENSG00000166342	NETO1	protein_coding	MIR548AV	ENSG00000263750	72853321	72853382	Intronic
20	1317571	1393096	75526	-	ENSG00000274322	AL136531.2	protein_coding	MIR6869	ENSG00000284436	1392900	1392961	Intronic
20	1368978	1393172	24195	-	ENSG00000088832	FKBP1A	protein_coding	MIR6869	ENSG00000284436	1392900	1392961	Exonic
20	2652145	2658393	6249	+	ENSG00000101361	NOP56	protein_coding	MIR1292	ENSG00000284481	2652777	2652842	Exonic
20	3888839	3929882	41044	+	ENSG00000125779	PANK2	protein_coding	MIR103A2	ENSG00000199024	3917494	3917571	Intronic
20	10637684	10673999	36316	-	ENSG00000101384	JAG1	protein_coding	MIR6870	ENSG00000273745	10649636	10649695	Intronic
20	18467127	18484643	17517	+	ENSG00000132664	POLR3F	protein_coding	MIR3192	ENSG00000265137	18470615	18470691	Intronic
20	26186920	26251526	64607	-	ENSG00000227195	MIR663AHG	processed_transcript	MIR663A	ENSG00000284419	26208186	26208278	SO
20	32207880	32238667	30788	+	ENSG00000101346	POFUT1	protein_coding	MIR1825	ENSG00000284125	32237795	32237847	Exonic
20	33993646	34108308	114663	+	ENSG00000125970	RALY	protein_coding	MIR4755	ENSG00000264616	34049119	34049190	Intronic
20	34363235	34511393	148159	+	ENSG00000078747	ITCH	protein_coding	MIR644A	ENSG00000207997	34466325	34466418	Intronic
20	34975403	35002437	27035	+	ENSG00000078814	MYH7B	protein_coding	MIR499A	ENSG00000207635	34990376	34990497	Intronic
20	35433347	35454746	21400	-	ENSG00000125965	GDF5	protein_coding	MIR1289-1	ENSG00000221763	35453954	35454097	Intronic
20	38472816	38578861	106046	+	ENSG00000170471	RALGAPB	protein_coding	MIR548O2	ENSG00000275453	38516563	38516632	Intronic
20	41136960	41196801	59842	+	ENSG00000124181	PLCG1	protein_coding	MIR6871	ENSG00000276169	41169023	41169078	Intronic
20	44355700	44434596	78897	+	ENSG00000101076	HNF4A	protein_coding	MIR3646	ENSG00000266151	44408120	44408203	Intronic
20	45416067	45456934	40868	+	ENSG00000124155	PIGT	protein_coding	MIR6812	ENSG00000273555	45425510	45425573	Intronic
20	46894624	47188844	294221	+	ENSG00000064655	EYA2	protein_coding	MIR3616	ENSG00000264901	47166967	47167058	Intronic
20	50586108	50691528	105421	-	ENSG00000042062	RIPOR3	protein_coding	MIR1302-5	ENSG00000221091	50614636	50614785	Intronic
20	51386957	51562831	175875	-	ENSG00000101096	NFATC2	protein_coding	MIR3194	ENSG00000266761	51452905	51452977	Intronic
20	53936777	54070594	133818	-	ENSG00000064787	BCAS1	protein_coding	MIR4756	ENSG00000265595	54068408	54068485	Intronic
20	58817132	58817725	594	-	ENSG00000268649	AL132655.2	lincRNA	MIR296	ENSG00000284040	58817615	58817694	Exonic
20	60087840	60527458	439619	+	ENSG00000228340	MIR646HG	lincRNA	MIR646	ENSG00000207802	60308474	60308567	Intronic
20	60087840	60527458	439619	+	ENSG00000228340	MIR646HG	lincRNA	MIR4533	ENSG00000266140	60478111	60478181	Intronic
20	61953469	62065810	112342	-	ENSG00000130699	TAF4	protein_coding	MIR1257	ENSG00000284193	61953546	61953662	Exonic
20	62307955	62367312	59358	-	ENSG00000130702	LAMA5	protein_coding	MIR4758	ENSG00000284074	62332487	62332557	SO
20	62550453	62570764	20312	+	ENSG00000174407	MIR1-1HG	antisense	MIR1-1	ENSG00000199017	62554306	62554376	Intronic
20	62550453	62570764	20312	+	ENSG00000174407	MIR1-1HG	antisense	MIR133A2	ENSG00000284508	62564912	62565013	SO
20	63235883	63240507	4625	+	ENSG00000101197	BIRC7	protein_coding	MIR3196	ENSG00000266463	63238779	63238842	Intronic
20	63272785	63289793	17009	+	ENSG00000101199	ARFGAP1	protein_coding	MIR4326	ENSG00000266104	63286808	63286866	Intronic
20	63895182	63936031	40850	+	ENSG00000101152	DNAJC5	protein_coding	MIR941-1	ENSG00000283206	63919449	63919520	Intronic
20	63895182	63936031	40850	+	ENSG00000101152	DNAJC5	protein_coding	MIR941-2	ENSG00000216141	63919505	63919576	Intronic
20	63895182	63936031	40850	+	ENSG00000101152	DNAJC5	protein_coding	MIR941-3	ENSG00000283513	63919561	63919632	Intronic
20	63895182	63936031	40850	+	ENSG00000101152	DNAJC5	protein_coding	MIR941-4	ENSG00000216195	63919756	63919827	Intronic
20	63895182	63936031	40850	+	ENSG00000101152	DNAJC5	protein_coding	MIR941-5	ENSG00000275842	63919868	63919939	Intronic
20	63939829	63956415	16587	-	ENSG00000198276	UCKL1	protein_coding	MIR1914	ENSG00000284433	63941465	63941544	Exonic
20	63939829	63956415	16587	-	ENSG00000198276	UCKL1	protein_coding	MIR647	ENSG00000207554	63942631	63942726	Intronic
20	64073181	64079988	6808	-	ENSG00000171700	RGS19	protein_coding	MIR6813	ENSG00000274034	64076955	64077010	Intronic
19	71778	72718	941	+	ENSG00000282807	AC008993.3	lincRNA	MIR1302-11	ENSG00000283801	71973	72110	Exonic
19	797075	812327	15253	+	ENSG00000011304	PTBP1	protein_coding	MIR4745	ENSG00000284361	804940	805001	Exonic
19	1815246	1848463	33218	-	ENSG00000079313	REXO1	protein_coding	MIR1909	ENSG00000284216	1816159	1816238	Exonic
19	2230084	2237704	7621	-	ENSG00000104886	PLEKHJ1	protein_coding	MIR1227	ENSG00000221411	2234062	2234149	Intronic
19	2230084	2237704	7621	-	ENSG00000104886	PLEKHJ1	protein_coding	MIR6789	ENSG00000284129	2235829	2235926	Exonic
19	2249309	2252073	2765	+	ENSG00000104899	AMH	protein_coding	MIR4321	ENSG00000284272	2250639	2250718	Exonic
19	2427638	2456996	29359	-	ENSG00000176619	LMNB2	protein_coding	MIR7108	ENSG00000283728	2434914	2435000	SO
19	3958453	3971123	12671	-	ENSG00000167657	DAPK3	protein_coding	MIR637	ENSG00000283928	3961414	3961512	Exonic
19	4769140	4772533	3394	+	ENSG00000176840	MIR7-3HG	lincRNA	MIR7-3	ENSG00000207630	4770670	4770779	Intronic
19	4903080	4962154	59075	+	ENSG00000276043	UHRF1	protein_coding	MIR4747	ENSG00000263409	4932687	4932740	Intronic
19	6379569	6393981	14413	-	ENSG00000125651	GTF2F1	protein_coding	MIR6885	ENSG00000274390	6389638	6389703	Intronic
19	6386762	6390400	3639	-	ENSG00000269444	AC011491.2	sense_overlapping	MIR6885	ENSG00000274390	6389638	6389703	Intronic
19	6379569	6393981	14413	-	ENSG00000125651	GTF2F1	protein_coding	MIR6790	ENSG00000273758	6392921	6392983	Intronic
19	6413348	6424794	11447	-	ENSG00000088247	KHSRP	protein_coding	MIR3940	ENSG00000284159	6416410	6416511	SO
19	6729914	6737603	7690	-	ENSG00000125734	GPR108	protein_coding	MIR6791	ENSG00000283950	6736712	6736778	Exonic
19	7595902	7618304	22403	+	ENSG00000076826	CAMSAP3	protein_coding	MIR6792	ENSG00000273657	7617439	7617505	Intronic
19	8374373	8390685	16313	-	ENSG00000269386	RAB11B-AS1	antisense	MIR4999	ENSG00000265390	8389290	8389380	Intronic
19	10037803	10074135	36333	+	ENSG00000167798	C3P1	transcribed_unprocessed_pseudogene	MIR5589	ENSG00000266204	10038354	10038413	Intronic
19	10391134	10420121	28988	-	ENSG00000105401	CDC37	protein_coding	MIR1181	ENSG00000284268	10403458	10403538	Exonic
19	10543895	10553418	9524	+	ENSG00000130734	ATG4D	protein_coding	MIR1238	ENSG00000221410	10552122	10552204	Intronic
19	10718079	10833488	115410	+	ENSG00000079805	DNM2	protein_coding	MIR638	ENSG00000207972	10718404	10718503	Intronic
19	10718079	10833488	115410	+	ENSG00000079805	DNM2	protein_coding	MIR4748	ENSG00000265879	10780254	10780335	Intronic
19	10718079	10833488	115410	+	ENSG00000079805	DNM2	protein_coding	MIR6793	ENSG00000275640	10828973	10829035	Intronic
19	11089362	11133816	44455	+	ENSG00000130164	LDLR	protein_coding	MIR6886	ENSG00000284553	11113474	11113534	SO
19	11466240	11505698	39459	-	ENSG00000267477	AC008481.3	protein_coding	MIR7974	ENSG00000274713	11495544	11495622	Intronic
19	11483427	11505923	22497	-	ENSG00000161914	ZNF653	protein_coding	MIR7974	ENSG00000274713	11495544	11495622	Intronic
19	12833951	12874951	41001	+	ENSG00000105613	MAST1	protein_coding	MIR6794	ENSG00000276181	12852260	12852327	Intronic
19	12938578	12944489	5912	+	ENSG00000179218	CALR	protein_coding	MIR6515	ENSG00000274417	12940484	12940540	Intronic
19	13823880	13842928	19049	-	ENSG00000267519	AC020916.1	antisense	MIR24-2	ENSG00000284387	13836287	13836359	Exonic
19	13823880	13842928	19049	-	ENSG00000267519	AC020916.1	antisense	MIR27A	ENSG00000207808	13836440	13836517	Exonic
19	13823880	13842928	19049	-	ENSG00000267519	AC020916.1	antisense	MIR23A	ENSG00000207980	13836587	13836659	Exonic
19	13862063	13880757	18695	+	ENSG00000187556	NANOS3	protein_coding	MIR181C	ENSG00000207613	13874699	13874808	Intronic
19	13862063	13880757	18695	+	ENSG00000187556	NANOS3	protein_coding	MIR181D	ENSG00000207585	13874875	13875011	Intronic
19	14072536	14075062	2527	+	ENSG00000141854	MISP3	protein_coding	MIR1199	ENSG00000284081	14073361	14073479	Exonic
19	14517085	14565980	48896	+	ENSG00000099797	TECR	protein_coding	MIR639	ENSG00000283822	14529543	14529640	SO
19	15159038	15200981	41944	-	ENSG00000074181	NOTCH3	protein_coding	MIR6795	ENSG00000275711	15179283	15179350	Intronic
19	18374731	18389176	14446	+	ENSG00000130513	GDF15	protein_coding	MIR3189	ENSG00000264175	18386562	18386634	Intronic
19	19385826	19508931	123106	+	ENSG00000167491	GATAD2A	protein_coding	MIR640	ENSG00000207821	19435063	19435158	Intronic
19	20340269	20424969	84701	-	ENSG00000231205	ZNF826P	transcribed_unprocessed_pseudogene	MIR1270	ENSG00000238517	20399272	20399354	Intronic
19	35106510	35124297	17788	+	ENSG00000285526	AC020907.6	protein_coding	MIR6887	ENSG00000284065	35122700	35122764	Intronic
19	35115879	35124324	8446	+	ENSG00000089356	FXYD3	protein_coding	MIR6887	ENSG00000284065	35122700	35122764	Exonic
19	35319261	35347355	28095	+	ENSG00000012124	CD22	protein_coding	MIR5196	ENSG00000284034	35345513	35345627	SO
19	39825350	39834201	8852	-	ENSG00000105204	DYRK1B	protein_coding	MIR6719	ENSG00000277759	39829716	39829802	Intronic
19	40230317	40285536	55220	-	ENSG00000105221	AKT2	protein_coding	MIR641	ENSG00000207631	40282543	40282641	Intronic
19	40348456	40380439	31984	+	ENSG00000105223	PLD3	protein_coding	MIR6796	ENSG00000275652	40369846	40369907	Intronic
19	41859918	41872926	13009	+	ENSG00000105372	RPS19	protein_coding	MIR6797	ENSG00000276926	41869627	41869698	Intronic
19	42086110	42196585	110476	-	ENSG00000028277	POU2F2	protein_coding	MIR4323	ENSG00000266226	42133445	42133513	Intronic
19	42325609	42378769	53161	+	ENSG00000105429	MEGF8	protein_coding	MIR8077	ENSG00000277533	42351131	42351205	Intronic
19	44632199	44718759	86561	-	ENSG00000266903	AC243964.2	antisense	MIR4531	ENSG00000283673	44653686	44653732	Intronic
19	44747705	44760044	12340	+	ENSG00000069399	BCL3	protein_coding	MIR8085	ENSG00000284258	44758657	44758721	Exonic
19	45606994	45645629	38636	-	ENSG00000125746	EML2	protein_coding	MIR330	ENSG00000284544	45638994	45639087	Exonic
19	45668244	45683724	15481	+	ENSG00000010310	GIPR	protein_coding	MIR642A	ENSG00000207773	45674928	45675024	Intronic
19	45995461	46021318	25858	+	ENSG00000104983	CCDC61	protein_coding	MIR769	ENSG00000211580	46018932	46019049	Intronic
19	46674275	46717127	42853	-	ENSG00000105287	PRKD2	protein_coding	MIR320E	ENSG00000211513	46709293	46709345	Intronic
19	47220822	47232766	11945	-	ENSG00000105327	BBC3	protein_coding	MIR3191	ENSG00000284411	47226944	47227019	Exonic
19	48993448	49015995	22548	+	ENSG00000183207	RUVBL2	protein_coding	MIR6798	ENSG00000273898	49009906	49009972	Intronic
19	49289638	49325225	35588	-	ENSG00000063127	SLC6A16	protein_coding	MIR4324	ENSG00000265407	49308797	49308868	Intronic
19	49675786	49689029	13244	+	ENSG00000126457	PRMT1	protein_coding	MIR5088	ENSG00000274306	49682117	49682195	Intronic
19	49766968	49807113	40146	+	ENSG00000196961	AP2A1	protein_coding	MIR6799	ENSG00000276270	49791866	49791934	Intronic
19	49818279	49840383	22105	+	ENSG00000104973	MED25	protein_coding	MIR6800	ENSG00000284114	49832018	49832099	Exonic
19	49850735	49860744	10010	+	ENSG00000104960	PTOV1	protein_coding	MIR4749	ENSG00000265954	49854591	49854651	Intronic
19	49877425	49888749	11325	+	ENSG00000104946	TBC1D17	protein_coding	MIR4750	ENSG00000284394	49888175	49888230	Exonic
19	49928702	49933935	5234	+	ENSG00000169136	ATF5	protein_coding	MIR4751	ENSG00000283842	49933064	49933137	Exonic
19	51689128	51712387	23260	+	ENSG00000182310	SPACA6	protein_coding	MIR99B	ENSG00000207550	51692612	51692681	Intronic
19	51689128	51712387	23260	+	ENSG00000182310	SPACA6	protein_coding	MIRLET7E	ENSG00000198972	51692786	51692864	Intronic
19	51689128	51712387	23260	+	ENSG00000182310	SPACA6	protein_coding	MIR125A	ENSG00000208008	51693254	51693339	Intronic
19	52190039	52229533	39495	+	ENSG00000105568	PPP2R1A	protein_coding	MIR6801	ENSG00000274380	52222020	52222098	Intronic
19	52269571	52296046	26476	+	ENSG00000196214	ZNF766	protein_coding	MIR643	ENSG00000208002	52281797	52281893	Intronic
19	53761961	53764199	2239	+	ENSG00000269842	AC011453.1	lincRNA	MIR519A2	ENSG00000284362	53762344	53762430	Exonic
19	53787597	53788169	573	-	ENSG00000269877	AC008753.3	lincRNA	MIR371B	ENSG00000284568	53787677	53787742	Exonic
19	53963040	53990215	27176	+	ENSG00000142408	CACNG8	protein_coding	MIR935	ENSG00000284583	53982307	53982397	Exonic
19	54643889	54670359	26471	+	ENSG00000186818	LILRB4	protein_coding	MIR8061	ENSG00000277636	54645309	54645383	Intronic
19	55229780	55258995	29216	-	ENSG00000105063	PPP6R1	protein_coding	MIR6804	ENSG00000275519	55230885	55230952	Intronic
19	55229780	55258995	29216	-	ENSG00000105063	PPP6R1	protein_coding	MIR6802	ENSG00000278328	55239912	55239976	Intronic
19	55229780	55258995	29216	-	ENSG00000105063	PPP6R1	protein_coding	MIR6803	ENSG00000278264	55245186	55245250	Intronic
19	55385345	55403250	17906	+	ENSG00000108107	RPL28	protein_coding	MIR6805	ENSG00000284029	55388181	55388242	Exonic
19	58327019	58342332	15314	+	ENSG00000182318	ZSCAN22	protein_coding	MIR6806	ENSG00000277588	58334688	58334751	Intronic
19	58544091	58550722	6632	+	ENSG00000130726	TRIM28	protein_coding	MIR6807	ENSG00000275924	58550285	58550376	Intronic
22	17734138	17774770	40633	-	ENSG00000015475	BID	protein_coding	MIR3198-1	ENSG00000264757	17764180	17764259	Intronic
22	17787649	18024559	236911	-	ENSG00000243156	MICAL3	protein_coding	MIR648	ENSG00000207780	17980868	17980961	Intronic
22	19941607	19969975	28369	+	ENSG00000093010	COMT	protein_coding	MIR4761	ENSG00000284031	19963753	19963834	SO
22	20017014	20065926	48913	+	ENSG00000183597	TANGO2	protein_coding	MIR185	ENSG00000208023	20033139	20033220	Intronic
22	20080232	20111877	31646	+	ENSG00000128191	DGCR8	protein_coding	MIR3618	ENSG00000284140	20085746	20085833	Exonic
22	20080232	20111877	31646	+	ENSG00000128191	DGCR8	protein_coding	MIR1306	ENSG00000284464	20086058	20086142	Exonic
22	20111866	20117392	5527	-	ENSG00000099899	TRMT2A	protein_coding	MIR6816	ENSG00000278278	20114686	20114751	Intronic
22	20241415	20283246	41832	-	ENSG00000040608	RTN4R	protein_coding	MIR1286	ENSG00000221039	20249134	20249211	Intronic
22	21652270	21670237	17968	+	ENSG00000207751	AP000553.1	processed_transcript	MIR301B	ENSG00000212102	21652981	21653058	Intronic
22	21652270	21670237	17968	+	ENSG00000207751	AP000553.1	processed_transcript	MIR130B	ENSG00000283871	21653304	21653385	SO
22	22822658	22823289	632	+	ENSG00000278196	IGLV2-8	IG_V_gene	MIR650	ENSG00000284049	22822776	22822871	SO
22	25448105	25520854	72750	+	ENSG00000100058	CRYBB2P1	transcribed_unprocessed_pseudogene	MIR6817	ENSG00000277872	25455646	25455711	Intronic
22	26521983	26596717	74735	-	ENSG00000128294	TPST2	protein_coding	MIR548J	ENSG00000221760	26555212	26555323	Intronic
22	27919376	28008581	89206	+	ENSG00000235954	TTC28-AS1	processed_transcript	MIR3199-2	ENSG00000283225	27920526	27920611	Intronic
22	29327680	29423179	95500	-	ENSG00000100280	AP1B1	protein_coding	MIR3653	ENSG00000280968	29333158	29333267	Intronic
22	29883155	30030866	147712	+	ENSG00000100330	MTMR3	protein_coding	MIR6818	ENSG00000275818	30007049	30007113	Intronic
22	30693782	30907824	214043	+	ENSG00000184792	OSBP2	protein_coding	MIR3200	ENSG00000264661	30731557	30731641	Intronic
22	31618491	31662432	43942	-	ENSG00000241878	PISD	protein_coding	MIR7109	ENSG00000284082	31621467	31621531	Exonic
22	33162226	33922841	760616	-	ENSG00000133424	LARGE1	protein_coding	MIR4764	ENSG00000266012	33436582	33436669	Intronic
22	35299275	35347994	48720	+	ENSG00000100284	TOM1	protein_coding	MIR3909	ENSG00000266320	35335640	35335758	Intronic
22	36281277	36388067	106791	-	ENSG00000100345	MYH9	protein_coding	MIR6819	ENSG00000278420	36286847	36286907	Intronic
22	37830855	37849327	18473	-	ENSG00000100124	ANKRD54	protein_coding	MIR658	ENSG00000284197	37844272	37844371	Exonic
22	37830855	37849327	18473	-	ENSG00000100124	ANKRD54	protein_coding	MIR659	ENSG00000207696	37847678	37847774	Intronic
22	37952607	38041915	89309	+	ENSG00000100142	POLR2F	protein_coding	MIR6820	ENSG00000284289	37967563	37967624	Intronic
22	37952607	38041915	89309	+	ENSG00000100142	POLR2F	protein_coding	MIR4534	ENSG00000284266	37988794	37988853	Intronic
22	40769630	40819399	49770	-	ENSG00000100372	SLC25A17	protein_coding	MIR4766	ENSG00000266594	40813883	40813958	Intronic
22	41091786	41180079	88294	+	ENSG00000100393	EP300	protein_coding	MIR1281	ENSG00000284015	41092513	41092566	Exonic
22	41245611	41286251	40641	-	ENSG00000100401	RANGAP1	protein_coding	MIR6889	ENSG00000274552	41252992	41253050	Intronic
22	41833079	41907308	74230	+	ENSG00000198911	SREBF2	protein_coding	MIR33A	ENSG00000207932	41900944	41901012	Intronic
22	41922023	41926818	4796	-	ENSG00000159958	TNFRSF13C	protein_coding	MIR378I	ENSG00000283829	41923222	41923297	Exonic
22	45190338	45240769	50432	-	ENSG00000100364	KIAA0930	protein_coding	MIR1249	ENSG00000221598	45200954	45201019	Intronic
22	45671798	45845307	173510	+	ENSG00000130638	ATXN10	protein_coding	MIR4762	ENSG00000264160	45760524	45760598	Intronic
22	46053869	46113928	60060	+	ENSG00000197182	MIRLET7BHG	lincRNA	MIR3619	ENSG00000266533	46091044	46091126	Intronic
22	46053869	46113928	60060	+	ENSG00000197182	MIRLET7BHG	lincRNA	MIRLET7A3	ENSG00000283990	46112749	46112822	Exonic
22	46053869	46113928	60060	+	ENSG00000197182	MIRLET7BHG	lincRNA	MIR4763	ENSG00000284175	46113566	46113657	Exonic
22	46053869	46113928	60060	+	ENSG00000197182	MIRLET7BHG	lincRNA	MIRLET7B	ENSG00000284520	46113686	46113768	Exonic
22	48489460	48850912	361453	+	ENSG00000219438	FAM19A5	protein_coding	MIR4535	ENSG00000266887	48780295	48780353	Intronic
22	49414524	49657542	243019	-	ENSG00000188511	C22orf34	lincRNA	MIR3667	ENSG00000264139	49543393	49543466	Intronic
22	49960513	49964080	3568	+	ENSG00000198355	PIM3	protein_coding	MIR6821	ENSG00000276753	49962866	49962939	Intronic
21	6858539	6897263	38725	+	ENSG00000278955	FP475955.1	lincRNA	MIR8069-1	ENSG00000284550	6859171	6859256	SO
21	8197620	8227646	30027	+	ENSG00000278996	FP671120.1	lincRNA	MIR6724-1	ENSG00000275950	8205315	8205406	Intronic
21	8197620	8227646	30027	+	ENSG00000278996	FP671120.1	lincRNA	MIR3648-1	ENSG00000275708	8208473	8208652	Intronic
21	8197620	8227646	30027	+	ENSG00000278996	FP671120.1	lincRNA	MIR3687-1	ENSG00000277437	8208844	8208904	Intronic
21	8380665	8410645	29981	+	ENSG00000280441	FP236383.1	lincRNA	MIR6724-3	ENSG00000277379	8388362	8388453	Intronic
21	13384249	13427773	43525	-	ENSG00000175302	ANKRD30BP1	unprocessed_pseudogene	MIR3156-3	ENSG00000266211	13406384	13406460	Intronic
21	15928296	16645065	716770	+	ENSG00000215386	MIR99AHG	lincRNA	MIR99A	ENSG00000207638	16539089	16539169	Intronic
21	15928296	16645065	716770	+	ENSG00000215386	MIR99AHG	lincRNA	MIRLET7C	ENSG00000199030	16539828	16539911	Intronic
21	15928296	16645065	716770	+	ENSG00000215386	MIR99AHG	lincRNA	MIR125B2	ENSG00000207863	16590237	16590325	Intronic
21	18561265	18760003	198739	-	ENSG00000224141	MIR548XHG	lincRNA	MIR548X	ENSG00000265841	18686090	18686164	Intronic
21	23065491	23131206	65716	+	ENSG00000230972	AP001116.1	lincRNA	MIR6130	ENSG00000275469	23079284	23079392	Intronic
21	25561909	25575168	13260	+	ENSG00000234883	MIR155HG	lincRNA	MIR155	ENSG00000283904	25573980	25574044	Exonic
21	33542618	33577481	34864	+	ENSG00000159140	SON	protein_coding	MIR6501	ENSG00000284448	33550662	33550728	Exonic
21	39380332	39515506	135175	+	ENSG00000285815	WRB-SH3BGR	protein_coding	MIR6508	ENSG00000275523	39447010	39447069	Intronic
21	39445855	39515506	69652	+	ENSG00000185437	SH3BGR	protein_coding	MIR6508	ENSG00000275523	39447010	39447069	Intronic
21	40010999	40847139	836141	-	ENSG00000171587	DSCAM	protein_coding	MIR4760	ENSG00000263973	40212352	40212431	Intronic
21	41739369	41767106	27738	-	ENSG00000183421	RIPK4	protein_coding	MIR6814	ENSG00000275166	41746772	41746841	Intronic
21	43529192	43659493	130302	-	ENSG00000160207	HSF2BP	protein_coding	MIR6070	ENSG00000278433	43609887	43609989	Intronic
21	45405137	45513720	108584	+	ENSG00000182871	COL18A1	protein_coding	MIR6815	ENSG00000275167	45478266	45478326	Intronic

## Sheet: MIRs_per_MIRHG
MIRHG_gene_id	number_of_hosted_microRNAs
ENSG00000225746	14
ENSG00000258399	10
ENSG00000171365	8
ENSG00000147246	6
ENSG00000215417	6
ENSG00000223403	6
ENSG00000258861	6
ENSG00000283638	6
ENSG00000101152	5
ENSG00000148120	5
ENSG00000249532	5
ENSG00000197182	4
ENSG00000230590	4
ENSG00000249859	4
ENSG00000011677	3
ENSG00000068024	3
ENSG00000071894	3
ENSG00000079805	3
ENSG00000105063	3
ENSG00000116171	3
ENSG00000164287	3
ENSG00000166508	3
ENSG00000181409	3
ENSG00000182310	3
ENSG00000215386	3
ENSG00000226702	3
ENSG00000231607	3
ENSG00000255248	3
ENSG00000264066	3
ENSG00000267519	3
ENSG00000269946	3
ENSG00000278996	3
ENSG00000004948	2
ENSG00000008710	2
ENSG00000033627	2
ENSG00000066136	2
ENSG00000072310	2
ENSG00000086758	2
ENSG00000100124	2
ENSG00000100142	2
ENSG00000102287	2
ENSG00000102466	2
ENSG00000103326	2
ENSG00000104886	2
ENSG00000108509	2
ENSG00000108654	2
ENSG00000110046	2
ENSG00000110717	2
ENSG00000111052	2
ENSG00000113810	2
ENSG00000116044	2
ENSG00000119522	2
ENSG00000125651	2
ENSG00000126012	2
ENSG00000128191	2
ENSG00000134369	2
ENSG00000136807	2
ENSG00000138771	2
ENSG00000138814	2
ENSG00000140945	2
ENSG00000145362	2
ENSG00000149256	2
ENSG00000153815	2
ENSG00000155093	2
ENSG00000157600	2
ENSG00000157823	2
ENSG00000159423	2
ENSG00000160145	2
ENSG00000161036	2
ENSG00000163870	2
ENSG00000168542	2
ENSG00000168675	2
ENSG00000171843	2
ENSG00000174407	2
ENSG00000178149	2
ENSG00000181722	2
ENSG00000182628	2
ENSG00000183426	2
ENSG00000183458	2
ENSG00000183889	2
ENSG00000184347	2
ENSG00000184985	2
ENSG00000185164	2
ENSG00000185305	2
ENSG00000187556	2
ENSG00000196092	2
ENSG00000197321	2
ENSG00000198276	2
ENSG00000198929	2
ENSG00000198947	2
ENSG00000203709	2
ENSG00000207751	2
ENSG00000214548	2
ENSG00000224020	2
ENSG00000225206	2
ENSG00000228340	2
ENSG00000228768	2
ENSG00000229719	2
ENSG00000229989	2
ENSG00000230630	2
ENSG00000233237	2
ENSG00000244257	2
ENSG00000249669	2
ENSG00000250021	2
ENSG00000253522	2
ENSG00000255275	2
ENSG00000255794	2
ENSG00000257084	2
ENSG00000260778	2
ENSG00000262454	2
ENSG00000265142	2
ENSG00000267047	2
ENSG00000267374	2
ENSG00000267532	2
ENSG00000269966	2
ENSG00000270069	2
ENSG00000273049	2
ENSG00000280870	2
ENSG00000283217	2
ENSG00000283239	2
ENSG00000285106	2
ENSG00000001617	1
ENSG00000001631	1
ENSG00000002746	1
ENSG00000002822	1
ENSG00000002834	1
ENSG00000004487	1
ENSG00000004864	1
ENSG00000004866	1
ENSG00000005243	1
ENSG00000005844	1
ENSG00000006607	1
ENSG00000007933	1
ENSG00000007944	1
ENSG00000008300	1
ENSG00000008838	1
ENSG00000010310	1
ENSG00000011275	1
ENSG00000011304	1
ENSG00000012124	1
ENSG00000012171	1
ENSG00000013297	1
ENSG00000013588	1
ENSG00000015475	1
ENSG00000018699	1
ENSG00000019144	1
ENSG00000020633	1
ENSG00000020922	1
ENSG00000028137	1
ENSG00000028277	1
ENSG00000029534	1
ENSG00000033100	1
ENSG00000033170	1
ENSG00000036448	1
ENSG00000040608	1
ENSG00000042062	1
ENSG00000047230	1
ENSG00000047648	1
ENSG00000048991	1
ENSG00000050405	1
ENSG00000053108	1
ENSG00000054267	1
ENSG00000054282	1
ENSG00000054356	1
ENSG00000054523	1
ENSG00000054938	1
ENSG00000056097	1
ENSG00000057704	1
ENSG00000060339	1
ENSG00000061938	1
ENSG00000062716	1
ENSG00000063127	1
ENSG00000063660	1
ENSG00000064300	1
ENSG00000064655	1
ENSG00000064787	1
ENSG00000065135	1
ENSG00000065485	1
ENSG00000065559	1
ENSG00000065618	1
ENSG00000066322	1
ENSG00000066583	1
ENSG00000067113	1
ENSG00000067715	1
ENSG00000069399	1
ENSG00000070182	1
ENSG00000070540	1
ENSG00000070756	1
ENSG00000070915	1
ENSG00000071127	1
ENSG00000071205	1
ENSG00000071242	1
ENSG00000071575	1
ENSG00000071859	1
ENSG00000072501	1
ENSG00000072682	1
ENSG00000072858	1
ENSG00000072864	1
ENSG00000073282	1
ENSG00000073792	1
ENSG00000074181	1
ENSG00000074266	1
ENSG00000074317	1
ENSG00000074800	1
ENSG00000075151	1
ENSG00000075711	1
ENSG00000076706	1
ENSG00000076826	1
ENSG00000078328	1
ENSG00000078399	1
ENSG00000078618	1
ENSG00000078747	1
ENSG00000078814	1
ENSG00000079308	1
ENSG00000079313	1
ENSG00000083067	1
ENSG00000083312	1
ENSG00000083799	1
ENSG00000084112	1
ENSG00000086570	1
ENSG00000087077	1
ENSG00000087258	1
ENSG00000087299	1
ENSG00000088247	1
ENSG00000088832	1
ENSG00000089094	1
ENSG00000089154	1
ENSG00000089356	1
ENSG00000090376	1
ENSG00000090975	1
ENSG00000092036	1
ENSG00000092054	1
ENSG00000093010	1
ENSG00000094916	1
ENSG00000095383	1
ENSG00000095539	1
ENSG00000096060	1
ENSG00000096401	1
ENSG00000099385	1
ENSG00000099797	1
ENSG00000099899	1
ENSG00000100058	1
ENSG00000100280	1
ENSG00000100284	1
ENSG00000100330	1
ENSG00000100345	1
ENSG00000100364	1
ENSG00000100372	1
ENSG00000100393	1
ENSG00000100401	1
ENSG00000100628	1
ENSG00000100697	1
ENSG00000100811	1
ENSG00000100911	1
ENSG00000101076	1
ENSG00000101096	1
ENSG00000101197	1
ENSG00000101199	1
ENSG00000101346	1
ENSG00000101361	1
ENSG00000101384	1
ENSG00000101773	1
ENSG00000101974	1
ENSG00000102243	1
ENSG00000102763	1
ENSG00000102858	1
ENSG00000103067	1
ENSG00000103257	1
ENSG00000103335	1
ENSG00000104332	1
ENSG00000104626	1
ENSG00000104899	1
ENSG00000104946	1
ENSG00000104960	1
ENSG00000104973	1
ENSG00000104983	1
ENSG00000105204	1
ENSG00000105221	1
ENSG00000105223	1
ENSG00000105287	1
ENSG00000105327	1
ENSG00000105372	1
ENSG00000105401	1
ENSG00000105429	1
ENSG00000105568	1
ENSG00000105613	1
ENSG00000105849	1
ENSG00000105866	1
ENSG00000105875	1
ENSG00000106003	1
ENSG00000106266	1
ENSG00000106367	1
ENSG00000106484	1
ENSG00000106554	1
ENSG00000106624	1
ENSG00000106682	1
ENSG00000106771	1
ENSG00000106823	1
ENSG00000106992	1
ENSG00000107140	1
ENSG00000107164	1
ENSG00000107175	1
ENSG00000107404	1
ENSG00000107521	1
ENSG00000107679	1
ENSG00000107736	1
ENSG00000107951	1
ENSG00000108001	1
ENSG00000108061	1
ENSG00000108094	1
ENSG00000108107	1
ENSG00000108312	1
ENSG00000108349	1
ENSG00000108352	1
ENSG00000108433	1
ENSG00000108474	1
ENSG00000108641	1
ENSG00000108799	1
ENSG00000109099	1
ENSG00000109339	1
ENSG00000109458	1
ENSG00000109472	1
ENSG00000109586	1
ENSG00000109606	1
ENSG00000109670	1
ENSG00000109756	1
ENSG00000110048	1
ENSG00000110435	1
ENSG00000110497	1
ENSG00000110693	1
ENSG00000110711	1
ENSG00000110719	1
ENSG00000111058	1
ENSG00000111077	1
ENSG00000111249	1
ENSG00000111275	1
ENSG00000111300	1
ENSG00000111481	1
ENSG00000111879	1
ENSG00000112339	1
ENSG00000112584	1
ENSG00000112787	1
ENSG00000112902	1
ENSG00000113108	1
ENSG00000113141	1
ENSG00000113269	1
ENSG00000113391	1
ENSG00000113448	1
ENSG00000113504	1
ENSG00000113532	1
ENSG00000113594	1
ENSG00000113790	1
ENSG00000114019	1
ENSG00000114166	1
ENSG00000114268	1
ENSG00000114270	1
ENSG00000114353	1
ENSG00000114491	1
ENSG00000114529	1
ENSG00000114861	1
ENSG00000115084	1
ENSG00000115183	1
ENSG00000115607	1
ENSG00000115648	1
ENSG00000115760	1
ENSG00000115966	1
ENSG00000116205	1
ENSG00000116539	1
ENSG00000116584	1
ENSG00000116691	1
ENSG00000116729	1
ENSG00000116815	1
ENSG00000116830	1
ENSG00000117069	1
ENSG00000117395	1
ENSG00000117632	1
ENSG00000117676	1
ENSG00000117983	1
ENSG00000118246	1
ENSG00000118263	1
ENSG00000118473	1
ENSG00000118873	1
ENSG00000119655	1
ENSG00000119686	1
ENSG00000119772	1
ENSG00000119844	1
ENSG00000119888	1
ENSG00000119913	1
ENSG00000119943	1
ENSG00000120093	1
ENSG00000120137	1
ENSG00000120158	1
ENSG00000120549	1
ENSG00000120885	1
ENSG00000120899	1
ENSG00000120925	1
ENSG00000121060	1
ENSG00000121281	1
ENSG00000121380	1
ENSG00000121716	1
ENSG00000121753	1
ENSG00000121775	1
ENSG00000122417	1
ENSG00000122678	1
ENSG00000122966	1
ENSG00000123064	1
ENSG00000123066	1
ENSG00000123384	1
ENSG00000123610	1
ENSG00000123933	1
ENSG00000123975	1
ENSG00000124155	1
ENSG00000124181	1
ENSG00000124491	1
ENSG00000124574	1
ENSG00000125246	1
ENSG00000125354	1
ENSG00000125462	1
ENSG00000125734	1
ENSG00000125746	1
ENSG00000125779	1
ENSG00000125954	1
ENSG00000125965	1
ENSG00000125970	1
ENSG00000126016	1
ENSG00000126091	1
ENSG00000126457	1
ENSG00000126581	1
ENSG00000126653	1
ENSG00000127054	1
ENSG00000127184	1
ENSG00000127191	1
ENSG00000127377	1
ENSG00000127838	1
ENSG00000127884	1
ENSG00000127928	1
ENSG00000127948	1
ENSG00000128294	1
ENSG00000128573	1
ENSG00000128645	1
ENSG00000128652	1
ENSG00000128833	1
ENSG00000129422	1
ENSG00000129657	1
ENSG00000129682	1
ENSG00000129965	1
ENSG00000130164	1
ENSG00000130177	1
ENSG00000130414	1
ENSG00000130513	1
ENSG00000130592	1
ENSG00000130600	1
ENSG00000130638	1
ENSG00000130699	1
ENSG00000130702	1
ENSG00000130726	1
ENSG00000130734	1
ENSG00000130826	1
ENSG00000131089	1
ENSG00000131127	1
ENSG00000131242	1
ENSG00000131558	1
ENSG00000131584	1
ENSG00000131626	1
ENSG00000131711	1
ENSG00000131725	1
ENSG00000131788	1
ENSG00000131979	1
ENSG00000132153	1
ENSG00000132305	1
ENSG00000132361	1
ENSG00000132475	1
ENSG00000132485	1
ENSG00000132554	1
ENSG00000132570	1
ENSG00000132664	1
ENSG00000132694	1
ENSG00000132849	1
ENSG00000133216	1
ENSG00000133424	1
ENSG00000133816	1
ENSG00000134030	1
ENSG00000134138	1
ENSG00000134146	1
ENSG00000134160	1
ENSG00000134324	1
ENSG00000134371	1
ENSG00000134504	1
ENSG00000134516	1
ENSG00000134686	1
ENSG00000134825	1
ENSG00000134871	1
ENSG00000134882	1
ENSG00000134962	1
ENSG00000135446	1
ENSG00000135540	1
ENSG00000135655	1
ENSG00000135750	1
ENSG00000135905	1
ENSG00000135926	1
ENSG00000135931	1
ENSG00000136279	1
ENSG00000136878	1
ENSG00000137076	1
ENSG00000137166	1
ENSG00000137309	1
ENSG00000137486	1
ENSG00000137497	1
ENSG00000137672	1
ENSG00000137869	1
ENSG00000137877	1
ENSG00000137996	1
ENSG00000138623	1
ENSG00000138639	1
ENSG00000138756	1
ENSG00000138802	1
ENSG00000138834	1
ENSG00000139168	1
ENSG00000139620	1
ENSG00000139842	1
ENSG00000139970	1
ENSG00000140009	1
ENSG00000140332	1
ENSG00000140350	1
ENSG00000140443	1
ENSG00000140474	1
ENSG00000140521	1
ENSG00000140548	1
ENSG00000140859	1
ENSG00000140968	1
ENSG00000141293	1
ENSG00000141429	1
ENSG00000141519	1
ENSG00000141526	1
ENSG00000141542	1
ENSG00000141627	1
ENSG00000141736	1
ENSG00000141854	1
ENSG00000142408	1
ENSG00000142611	1
ENSG00000142619	1
ENSG00000143164	1
ENSG00000143179	1
ENSG00000143367	1
ENSG00000143374	1
ENSG00000143382	1
ENSG00000143476	1
ENSG00000143549	1
ENSG00000143552	1
ENSG00000143570	1
ENSG00000143669	1
ENSG00000143748	1
ENSG00000143761	1
ENSG00000143811	1
ENSG00000143816	1
ENSG00000144063	1
ENSG00000144331	1
ENSG00000144366	1
ENSG00000144451	1
ENSG00000144535	1
ENSG00000144579	1
ENSG00000144677	1
ENSG00000144747	1
ENSG00000145012	1
ENSG00000145016	1
ENSG00000145087	1
ENSG00000145147	1
ENSG00000145198	1
ENSG00000145284	1
ENSG00000146021	1
ENSG00000146143	1
ENSG00000146426	1
ENSG00000146433	1
ENSG00000146540	1
ENSG00000146676	1
ENSG00000146826	1
ENSG00000147231	1
ENSG00000147459	1
ENSG00000147687	1
ENSG00000148154	1
ENSG00000148308	1
ENSG00000148400	1
ENSG00000148655	1
ENSG00000149091	1
ENSG00000149177	1
ENSG00000149295	1
ENSG00000149485	1
ENSG00000149571	1
ENSG00000150054	1
ENSG00000150275	1
ENSG00000150593	1
ENSG00000151240	1
ENSG00000151474	1
ENSG00000151532	1
ENSG00000152092	1
ENSG00000152127	1
ENSG00000152556	1
ENSG00000152767	1
ENSG00000152782	1
ENSG00000153086	1
ENSG00000153107	1
ENSG00000153179	1
ENSG00000153250	1
ENSG00000153310	1
ENSG00000153395	1
ENSG00000153976	1
ENSG00000154102	1
ENSG00000154122	1
ENSG00000154217	1
ENSG00000154229	1
ENSG00000154262	1
ENSG00000154310	1
ENSG00000154359	1
ENSG00000154370	1
ENSG00000154655	1
ENSG00000154822	1
ENSG00000154864	1
ENSG00000155034	1
ENSG00000155189	1
ENSG00000155846	1
ENSG00000155849	1
ENSG00000155926	1
ENSG00000156026	1
ENSG00000156170	1
ENSG00000156802	1
ENSG00000156976	1
ENSG00000157087	1
ENSG00000157483	1
ENSG00000157593	1
ENSG00000158019	1
ENSG00000158158	1
ENSG00000158813	1
ENSG00000158828	1
ENSG00000158882	1
ENSG00000158966	1
ENSG00000159140	1
ENSG00000159840	1
ENSG00000159842	1
ENSG00000159958	1
ENSG00000160207	1
ENSG00000160551	1
ENSG00000160949	1
ENSG00000160999	1
ENSG00000161013	1
ENSG00000161016	1
ENSG00000161547	1
ENSG00000161714	1
ENSG00000161914	1
ENSG00000162062	1
ENSG00000162063	1
ENSG00000162105	1
ENSG00000162231	1
ENSG00000162298	1
ENSG00000162302	1
ENSG00000162341	1
ENSG00000162496	1
ENSG00000162511	1
ENSG00000162591	1
ENSG00000162687	1
ENSG00000162923	1
ENSG00000163046	1
ENSG00000163249	1
ENSG00000163430	1
ENSG00000163501	1
ENSG00000163694	1
ENSG00000163808	1
ENSG00000163874	1
ENSG00000163875	1
ENSG00000163995	1
ENSG00000164024	1
ENSG00000164091	1
ENSG00000164187	1
ENSG00000164574	1
ENSG00000164754	1
ENSG00000164929	1
ENSG00000165119	1
ENSG00000165209	1
ENSG00000165271	1
ENSG00000165475	1
ENSG00000165702	1
ENSG00000165795	1
ENSG00000165802	1
ENSG00000165813	1
ENSG00000165912	1
ENSG00000166012	1
ENSG00000166171	1
ENSG00000166233	1
ENSG00000166342	1
ENSG00000166501	1
ENSG00000166598	1
ENSG00000166783	1
ENSG00000166831	1
ENSG00000166833	1
ENSG00000166887	1
ENSG00000166917	1
ENSG00000166920	1
ENSG00000166986	1
ENSG00000167244	1
ENSG00000167306	1
ENSG00000167323	1
ENSG00000167491	1
ENSG00000167657	1
ENSG00000167798	1
ENSG00000168026	1
ENSG00000168079	1
ENSG00000168386	1
ENSG00000168702	1
ENSG00000169071	1
ENSG00000169136	1
ENSG00000169247	1
ENSG00000169306	1
ENSG00000169398	1
ENSG00000169604	1
ENSG00000169964	1
ENSG00000170144	1
ENSG00000170340	1
ENSG00000170471	1
ENSG00000170525	1
ENSG00000170776	1
ENSG00000171044	1
ENSG00000171310	1
ENSG00000171346	1
ENSG00000171587	1
ENSG00000171700	1
ENSG00000171889	1
ENSG00000171914	1
ENSG00000171988	1
ENSG00000172053	1
ENSG00000172292	1
ENSG00000172379	1
ENSG00000172789	1
ENSG00000172869	1
ENSG00000172889	1
ENSG00000172890	1
ENSG00000172965	1
ENSG00000172987	1
ENSG00000172995	1
ENSG00000173064	1
ENSG00000173207	1
ENSG00000173227	1
ENSG00000173272	1
ENSG00000173273	1
ENSG00000173575	1
ENSG00000173599	1
ENSG00000173614	1
ENSG00000173818	1
ENSG00000173852	1
ENSG00000173915	1
ENSG00000173950	1
ENSG00000174197	1
ENSG00000174233	1
ENSG00000174446	1
ENSG00000174485	1
ENSG00000174607	1
ENSG00000175029	1
ENSG00000175048	1
ENSG00000175155	1
ENSG00000175161	1
ENSG00000175197	1
ENSG00000175215	1
ENSG00000175216	1
ENSG00000175265	1
ENSG00000175302	1
ENSG00000175356	1
ENSG00000175414	1
ENSG00000175970	1
ENSG00000176393	1
ENSG00000176619	1
ENSG00000176840	1
ENSG00000176953	1
ENSG00000176974	1
ENSG00000177283	1
ENSG00000177694	1
ENSG00000177728	1
ENSG00000177854	1
ENSG00000177963	1
ENSG00000178031	1
ENSG00000178209	1
ENSG00000178568	1
ENSG00000178814	1
ENSG00000178878	1
ENSG00000178896	1
ENSG00000178952	1
ENSG00000179094	1
ENSG00000179218	1
ENSG00000179241	1
ENSG00000179399	1
ENSG00000179588	1
ENSG00000179603	1
ENSG00000179715	1
ENSG00000179915	1
ENSG00000180233	1
ENSG00000180747	1
ENSG00000180777	1
ENSG00000180900	1
ENSG00000180921	1
ENSG00000181072	1
ENSG00000181090	1
ENSG00000181211	1
ENSG00000181215	1
ENSG00000181234	1
ENSG00000181789	1
ENSG00000182118	1
ENSG00000182179	1
ENSG00000182318	1
ENSG00000182372	1
ENSG00000182473	1
ENSG00000182601	1
ENSG00000182732	1
ENSG00000182742	1
ENSG00000182771	1
ENSG00000182871	1
ENSG00000182957	1
ENSG00000183032	1
ENSG00000183049	1
ENSG00000183207	1
ENSG00000183230	1
ENSG00000183421	1
ENSG00000183580	1
ENSG00000183597	1
ENSG00000183655	1
ENSG00000183780	1
ENSG00000184110	1
ENSG00000184368	1
ENSG00000184709	1
ENSG00000184792	1
ENSG00000184916	1
ENSG00000185000	1
ENSG00000185010	1
ENSG00000185049	1
ENSG00000185053	1
ENSG00000185189	1
ENSG00000185274	1
ENSG00000185352	1
ENSG00000185359	1
ENSG00000185437	1
ENSG00000185475	1
ENSG00000185532	1
ENSG00000185551	1
ENSG00000185565	1
ENSG00000185596	1
ENSG00000185774	1
ENSG00000186007	1
ENSG00000186185	1
ENSG00000186350	1
ENSG00000186594	1
ENSG00000186642	1
ENSG00000186815	1
ENSG00000186818	1
ENSG00000186952	1
ENSG00000187024	1
ENSG00000187147	1
ENSG00000187323	1
ENSG00000187514	1
ENSG00000187672	1
ENSG00000188158	1
ENSG00000188352	1
ENSG00000188419	1
ENSG00000188511	1
ENSG00000188859	1
ENSG00000189283	1
ENSG00000196214	1
ENSG00000196247	1
ENSG00000196284	1
ENSG00000196305	1
ENSG00000196353	1
ENSG00000196367	1
ENSG00000196405	1
ENSG00000196498	1
ENSG00000196642	1
ENSG00000196655	1
ENSG00000196739	1
ENSG00000196792	1
ENSG00000196878	1
ENSG00000196961	1
ENSG00000197136	1
ENSG00000197157	1
ENSG00000197283	1
ENSG00000197616	1
ENSG00000197712	1
ENSG00000197724	1
ENSG00000197748	1
ENSG00000197757	1
ENSG00000197959	1
ENSG00000198198	1
ENSG00000198223	1
ENSG00000198353	1
ENSG00000198355	1
ENSG00000198373	1
ENSG00000198626	1
ENSG00000198700	1
ENSG00000198755	1
ENSG00000198759	1
ENSG00000198873	1
ENSG00000198911	1
ENSG00000201096	1
ENSG00000203740	1
ENSG00000204003	1
ENSG00000204220	1
ENSG00000204262	1
ENSG00000204308	1
ENSG00000204310	1
ENSG00000204356	1
ENSG00000204422	1
ENSG00000204427	1
ENSG00000204442	1
ENSG00000204469	1
ENSG00000204574	1
ENSG00000204580	1
ENSG00000204682	1
ENSG00000204745	1
ENSG00000205609	1
ENSG00000205746	1
ENSG00000206120	1
ENSG00000206190	1
ENSG00000206530	1
ENSG00000206560	1
ENSG00000206561	1
ENSG00000206948	1
ENSG00000207955	1
ENSG00000213085	1
ENSG00000213445	1
ENSG00000213465	1
ENSG00000213533	1
ENSG00000213963	1
ENSG00000214113	1
ENSG00000214176	1
ENSG00000214188	1
ENSG00000214288	1
ENSG00000214357	1
ENSG00000214787	1
ENSG00000214954	1
ENSG00000215252	1
ENSG00000216306	1
ENSG00000218336	1
ENSG00000219438	1
ENSG00000221944	1
ENSG00000221955	1
ENSG00000221968	1
ENSG00000222041	1
ENSG00000223725	1
ENSG00000223749	1
ENSG00000224081	1
ENSG00000224141	1
ENSG00000224184	1
ENSG00000224419	1
ENSG00000224592	1
ENSG00000225190	1
ENSG00000225264	1
ENSG00000225697	1
ENSG00000226380	1
ENSG00000226688	1
ENSG00000226950	1
ENSG00000227057	1
ENSG00000227195	1
ENSG00000227232	1
ENSG00000227518	1
ENSG00000227531	1
ENSG00000227555	1
ENSG00000227598	1
ENSG00000227671	1
ENSG00000227722	1
ENSG00000227827	1
ENSG00000228526	1
ENSG00000228590	1
ENSG00000228824	1
ENSG00000229140	1
ENSG00000229358	1
ENSG00000229401	1
ENSG00000229453	1
ENSG00000230021	1
ENSG00000230124	1
ENSG00000230501	1
ENSG00000230898	1
ENSG00000230937	1
ENSG00000230972	1
ENSG00000231064	1
ENSG00000231090	1
ENSG00000231205	1
ENSG00000231767	1
ENSG00000232044	1
ENSG00000232536	1
ENSG00000233006	1
ENSG00000233183	1
ENSG00000233665	1
ENSG00000233951	1
ENSG00000234323	1
ENSG00000234371	1
ENSG00000234474	1
ENSG00000234745	1
ENSG00000234769	1
ENSG00000234883	1
ENSG00000234912	1
ENSG00000235954	1
ENSG00000236240	1
ENSG00000236901	1
ENSG00000237004	1
ENSG00000238201	1
ENSG00000240553	1
ENSG00000241621	1
ENSG00000241878	1
ENSG00000242086	1
ENSG00000242797	1
ENSG00000243107	1
ENSG00000243156	1
ENSG00000243349	1
ENSG00000243485	1
ENSG00000244045	1
ENSG00000244879	1
ENSG00000245080	1
ENSG00000245526	1
ENSG00000245532	1
ENSG00000245832	1
ENSG00000247095	1
ENSG00000247516	1
ENSG00000248266	1
ENSG00000248592	1
ENSG00000249881	1
ENSG00000249898	1
ENSG00000250251	1
ENSG00000250551	1
ENSG00000251230	1
ENSG00000251314	1
ENSG00000251670	1
ENSG00000253230	1
ENSG00000254093	1
ENSG00000254248	1
ENSG00000254349	1
ENSG00000254377	1
ENSG00000254602	1
ENSG00000254631	1
ENSG00000254681	1
ENSG00000254772	1
ENSG00000255491	1
ENSG00000255508	1
ENSG00000255571	1
ENSG00000255823	1
ENSG00000255835	1
ENSG00000256069	1
ENSG00000256806	1
ENSG00000257178	1
ENSG00000257184	1
ENSG00000257221	1
ENSG00000257264	1
ENSG00000257354	1
ENSG00000257365	1
ENSG00000257524	1
ENSG00000257612	1
ENSG00000258081	1
ENSG00000258344	1
ENSG00000258498	1
ENSG00000258724	1
ENSG00000258924	1
ENSG00000258932	1
ENSG00000259132	1
ENSG00000259240	1
ENSG00000259553	1
ENSG00000259805	1
ENSG00000259976	1
ENSG00000259995	1
ENSG00000260027	1
ENSG00000260083	1
ENSG00000260314	1
ENSG00000260351	1
ENSG00000260653	1
ENSG00000260916	1
ENSG00000261043	1
ENSG00000261236	1
ENSG00000261609	1
ENSG00000261738	1
ENSG00000261771	1
ENSG00000261793	1
ENSG00000261963	1
ENSG00000262560	1
ENSG00000262633	1
ENSG00000263528	1
ENSG00000263724	1
ENSG00000264107	1
ENSG00000264448	1
ENSG00000265206	1
ENSG00000265394	1
ENSG00000265496	1
ENSG00000265794	1
ENSG00000266111	1
ENSG00000266903	1
ENSG00000266919	1
ENSG00000267028	1
ENSG00000267151	1
ENSG00000267206	1
ENSG00000267391	1
ENSG00000267477	1
ENSG00000267761	1
ENSG00000268471	1
ENSG00000268649	1
ENSG00000269386	1
ENSG00000269444	1
ENSG00000269842	1
ENSG00000269877	1
ENSG00000270394	1
ENSG00000270898	1
ENSG00000271860	1
ENSG00000272752	1
ENSG00000273003	1
ENSG00000273046	1
ENSG00000273118	1
ENSG00000273167	1
ENSG00000274020	1
ENSG00000274322	1
ENSG00000274536	1
ENSG00000275023	1
ENSG00000275700	1
ENSG00000276043	1
ENSG00000277586	1
ENSG00000278053	1
ENSG00000278196	1
ENSG00000278955	1
ENSG00000279302	1
ENSG00000279457	1
ENSG00000279571	1
ENSG00000279765	1
ENSG00000280237	1
ENSG00000280441	1
ENSG00000282304	1
ENSG00000282511	1
ENSG00000282785	1
ENSG00000282807	1
ENSG00000282890	1
ENSG00000283041	1
ENSG00000283154	1
ENSG00000283155	1
ENSG00000283341	1
ENSG00000283408	1
ENSG00000284707	1
ENSG00000284779	1
ENSG00000284879	1
ENSG00000284989	1
ENSG00000285133	1
ENSG00000285218	1
ENSG00000285526	1
ENSG00000285628	1
ENSG00000285679	1
ENSG00000285708	1
ENSG00000285730	1
ENSG00000285779	1
ENSG00000285815	1
ENSG00000285882	1
ENSG00000285940	1
ENSG00000285943	1
ENSG00000285953	1

## Sheet: DE-MIRHG_A_to_Q
gene_names	gene_biotype	gene_id	logFC	logCPM	PValue	FDR	No.of_miR_hosted
GDF5	protein_coding	ENSG00000125965	2.35161	4.34069	5.35845e-269	4.5011e-266	1
CAMK1D	protein_coding	ENSG00000183049	2.30279	4.03825	1.98563e-246	1.40106e-243	1
CLU	protein_coding	ENSG00000120885	1.88344	9.3103	2.42178e-246	1.64308e-243	1
LDLR	protein_coding	ENSG00000130164	1.8502	8.84289	9.5915e-252	7.35626e-249	1
TENM4	protein_coding	ENSG00000149256	1.76986	2.44273	3.15224e-69	3.23288e-67	2
SNCB	protein_coding	ENSG00000074317	1.7639	-2.22404	0.000188295	0.000773888	1
PTPRN2	protein_coding	ENSG00000155093	1.70904	-2.19803	5.44837e-05	0.000251332	2
FADS1	protein_coding	ENSG00000149485	1.65095	7.38842	2.1273e-193	1.04238e-190	1
SREBF2	protein_coding	ENSG00000198911	1.57212	7.61422	5.47856e-184	2.47799e-181	1
LPIN1	protein_coding	ENSG00000134324	1.56968	6.24522	8.39782e-182	3.70344e-179	1
CPNE4	protein_coding	ENSG00000196353	1.51823	-3.24859	0.0195116	0.0475263	1
PIEZO2	protein_coding	ENSG00000154864	1.50939	4.66082	3.56495e-134	9.24789e-132	1
KCNT2	protein_coding	ENSG00000162687	1.46256	0.351656	6.93242e-17	1.11475e-15	1
YPEL2	protein_coding	ENSG00000175155	1.40203	2.03221	1.37045e-46	7.5077e-45	1
CPE	protein_coding	ENSG00000109472	1.3571	3.42063	3.33693e-59	2.67561e-57	1
FGF14	protein_coding	ENSG00000102466	1.26151	-2.59193	0.0151779	0.0382592	2
ABCA6	protein_coding	ENSG00000154262	1.16051	-2.91815	0.0119577	0.0311599	1
LRP1B	protein_coding	ENSG00000168702	1.14989	0.086407	2.14972e-08	1.65594e-07	1
RTN4R	protein_coding	ENSG00000040608	1.11349	-1.60085	0.00427806	0.0126789	1
SYT1	protein_coding	ENSG00000067715	1.1118	3.02977	4.82457e-38	1.96548e-36	1
FMO3	protein_coding	ENSG00000007933	1.1087	0.838098	6.42669e-15	9.01884e-14	1
MTUS1	protein_coding	ENSG00000129422	1.0931	-0.00259663	4.38117e-09	3.65235e-08	1
WNT9A	protein_coding	ENSG00000143816	1.07284	0.719675	2.2256e-11	2.35087e-10	1
MIR99AHG	lincRNA	ENSG00000215386	1.05929	-1.33296	0.000774035	0.00277746	3
MIR3936HG	processed_transcript	ENSG00000233006	1.05506	-2.31056	0.00233643	0.00741137	1
ECM2	protein_coding	ENSG00000106823	1.04508	0.719377	1.28412e-12	1.51214e-11	1
ANK2	protein_coding	ENSG00000145362	1.02548	2.59092	4.57936e-30	1.4e-28	2
NOTCH3	protein_coding	ENSG00000074181	-1.02389	6.6234	2.66596e-64	2.39937e-62	1
HS3ST3A1	protein_coding	ENSG00000153976	-1.0262	5.05094	1.52157e-63	1.34877e-61	1
LAPTM5	protein_coding	ENSG00000162511	-1.03902	-2.39251	0.0104023	0.027631	1
ATAD2	protein_coding	ENSG00000156802	-1.04224	5.42045	2.91905e-74	3.38764e-72	1
TONSL	protein_coding	ENSG00000160949	-1.04907	3.15948	1.38224e-33	4.87653e-32	1
RBM47	protein_coding	ENSG00000163694	-1.06438	-1.40446	0.00173182	0.00567198	1
DLEU2	antisense	ENSG00000231607	-1.06499	1.55632	2.59779e-22	5.73529e-21	3
MCM7	protein_coding	ENSG00000166508	-1.09044	6.01756	7.38189e-91	1.15236e-88	3
DHRS3	protein_coding	ENSG00000162496	-1.09272	2.57555	3.28268e-41	1.52385e-39	1
AC016205.1	lincRNA	ENSG00000267374	-1.13849	-1.09658	5.37518e-07	3.42675e-06	2
KIF18B	protein_coding	ENSG00000186185	-1.14524	3.5643	3.55053e-57	2.73499e-55	1
CHST11	protein_coding	ENSG00000171310	-1.16042	2.88371	9.19359e-21	1.84081e-19	1
AC234582.1	antisense	ENSG00000231064	-1.16784	-1.60313	0.00119174	0.00406777	1
DTL	protein_coding	ENSG00000143476	-1.17258	3.85851	6.02096e-52	3.96305e-50	1
TRPC6	protein_coding	ENSG00000137672	-1.21424	3.81505	1.27224e-65	1.19374e-63	1
RPS6KA1	protein_coding	ENSG00000117676	-1.28803	0.702799	2.2944e-19	4.31025e-18	1
PDE4D	protein_coding	ENSG00000113448	-1.29549	3.93837	1.76898e-53	1.23339e-51	1
C15orf48	protein_coding	ENSG00000166920	-1.39926	-0.323614	2.51355e-06	1.44521e-05	1
GPC5	protein_coding	ENSG00000179399	-1.50795	-1.61725	5.97913e-07	3.78171e-06	1
PPARGC1B	protein_coding	ENSG00000155846	-1.59554	-1.45869	8.28169e-05	0.000367797	1
Z94721.3	bidirectional_promoter_lncRNA	ENSG00000285730	-1.67661	-3.11947	0.00526639	0.0152069	1
SLC35F3	protein_coding	ENSG00000183780	-2.1385	0.276799	3.46361e-12	3.93167e-11	1

## Sheet: DE-MIRHG_Q_to_3h
gene_names	gene_biotype	gene_id	logFC	logCPM	PValue	FDR	No.of_miR_hosted
NFATC2	protein_coding	ENSG00000101096	5.76361	2.94899	0	0	1
SYT12	protein_coding	ENSG00000173227	4.80244	0.670834	2.42274e-126	1.13966e-124	1
C3orf52	protein_coding	ENSG00000114529	4.63379	5.40881	0	0	1
TMCC3	protein_coding	ENSG00000057704	3.74607	-0.58819	4.97083e-28	4.86061e-27	1
ASB2	protein_coding	ENSG00000100628	3.7025	0.0119577	1.34029e-53	2.38574e-52	1
FZD8	protein_coding	ENSG00000177283	3.25738	5.26563	0	0	1
SEMA7A	protein_coding	ENSG00000138623	3.00423	7.84944	0	0	1
MALL	protein_coding	ENSG00000144063	2.93852	-0.25897	4.8376e-08	1.70398e-07	1
JAG2	protein_coding	ENSG00000184916	2.88584	-0.122074	3.81187e-38	4.9588e-37	1
POU2F2	protein_coding	ENSG00000028277	2.87576	4.47593	0	0	1
C15orf48	protein_coding	ENSG00000166920	2.79809	-0.323614	2.81289e-29	2.83507e-28	1
LINC-PINT	lincRNA	ENSG00000226380	2.62384	1.78022	2.92313e-98	9.95443e-97	1
MIR31HG	sense_overlapping	ENSG00000171889	2.53034	2.96607	1.59192e-129	7.75732e-128	1
CHST11	protein_coding	ENSG00000171310	2.40284	2.88371	1.12214e-96	3.75607e-95	1
MIR3142HG	lincRNA	ENSG00000253522	2.36596	-4.13465	0.000477485	0.00110031	2
TNS1	protein_coding	ENSG00000079308	2.35244	8.51191	0	0	1
PFKFB3	protein_coding	ENSG00000170525	2.24819	6.92293	0	0	1
MIR17HG	processed_transcript	ENSG00000215417	2.18105	0.302897	9.91937e-35	1.18871e-33	6
TBC1D2	protein_coding	ENSG00000095383	2.16518	6.8767	0	0	1
TNFAIP6	protein_coding	ENSG00000123610	2.01666	2.48573	1.78854e-100	6.23514e-99	1
AC020916.1	antisense	ENSG00000267519	1.92901	4.33016	4.11382e-73	1.00649e-71	3
GRID1	protein_coding	ENSG00000182771	1.92876	-3.61365	0.0153723	0.0277778	1
AC016831.6	lincRNA	ENSG00000285106	1.90588	2.20113	1.11813e-56	2.09605e-55	2
ATP10A	protein_coding	ENSG00000206190	1.89736	6.17966	2.71112e-225	2.67174e-223	1
ANKH	protein_coding	ENSG00000154122	1.84299	6.24796	1.2802e-256	1.45695e-254	1
SLC35F3	protein_coding	ENSG00000183780	1.77815	0.276799	9.03962e-08	3.11626e-07	1
COL27A1	protein_coding	ENSG00000196739	1.75733	6.19237	8.96438e-203	7.71374e-201	1
PIM3	protein_coding	ENSG00000198355	1.69264	4.66707	3.84902e-180	2.74885e-178	1
MYO1E	protein_coding	ENSG00000157483	1.68073	6.49206	7.11511e-193	5.73108e-191	1
ZC3H12A	protein_coding	ENSG00000163874	1.63463	3.13143	1.08131e-96	3.6263e-95	1
RUNX3	protein_coding	ENSG00000020633	1.63046	-0.166866	2.12342e-14	1.15895e-13	1
RCL1	protein_coding	ENSG00000120158	1.56397	3.5523	9.29823e-96	3.04871e-94	1
MICAL2	protein_coding	ENSG00000133816	1.51189	8.69072	1.4061e-175	9.68891e-174	1
PURB	protein_coding	ENSG00000146676	1.47817	6.56059	6.59611e-130	3.22314e-128	1
B3GNT2	protein_coding	ENSG00000170340	1.44697	4.81264	6.22697e-105	2.28365e-103	1
NAV2	protein_coding	ENSG00000166833	1.43835	6.14407	1.27541e-41	1.78416e-40	1
UCK2	protein_coding	ENSG00000143179	1.41617	6.71088	7.62644e-144	4.24386e-142	1
GCH1	protein_coding	ENSG00000131979	1.40894	0.204997	1.2841e-16	7.82975e-16	1
DOCK2	protein_coding	ENSG00000134516	1.40672	0.990803	2.41195e-13	1.23396e-12	1
PLCL2	protein_coding	ENSG00000154822	1.38986	-0.618471	1.46347e-07	4.95693e-07	1
PPARGC1B	protein_coding	ENSG00000155846	1.37764	-1.45869	0.00136114	0.00294716	1
Z94721.3	bidirectional_promoter_lncRNA	ENSG00000285730	1.34735	-3.11947	0.0250602	0.0432758	1
FOXP4	protein_coding	ENSG00000137166	1.33628	5.29491	1.71731e-22	1.37697e-21	1
AATK	protein_coding	ENSG00000181409	1.33391	-2.55992	0.00121436	0.00264787	3
KLF7	protein_coding	ENSG00000118263	1.29747	6.01548	9.5163e-131	4.71538e-129	1
GDF15	protein_coding	ENSG00000130513	1.29573	5.95739	4.59048e-114	1.89196e-112	1
AMH	protein_coding	ENSG00000104899	1.29459	-1.15148	2.512e-05	6.77653e-05	1
MIR22HG	lincRNA	ENSG00000186594	1.29341	6.44286	7.06329e-125	3.28751e-123	1
DOCK10	protein_coding	ENSG00000135905	1.29184	5.50039	3.30663e-99	1.13924e-97	1
MIR155HG	lincRNA	ENSG00000234883	1.27348	1.21546	6.2628e-19	4.29533e-18	1
MIR222HG	lincRNA	ENSG00000270069	1.26941	4.1565	8.10132e-38	1.04694e-36	2
GATAD2A	protein_coding	ENSG00000167491	1.26372	7.10314	1.22896e-130	6.07253e-129	1
SPTBN5	protein_coding	ENSG00000137877	1.2513	0.977462	4.28822e-08	1.51561e-07	1
RBMS1	protein_coding	ENSG00000153250	1.23067	7.43848	1.82604e-112	7.35417e-111	1
PTPRJ	protein_coding	ENSG00000149177	1.2133	5.66823	1.87412e-109	7.26581e-108	1
AC234582.1	antisense	ENSG00000231064	1.20655	-1.60313	0.00106422	0.002339	1
CNNM4	protein_coding	ENSG00000158158	1.20553	4.02916	7.60606e-75	1.91947e-73	1
EYA2	protein_coding	ENSG00000064655	1.20374	-0.378624	7.14388e-10	2.89497e-09	1
FKBP5	protein_coding	ENSG00000096060	1.13827	4.02949	1.59847e-57	3.03194e-56	1
MIR34AHG	lincRNA	ENSG00000228526	1.11757	4.69688	9.344e-56	1.72054e-54	1
NANOS3	protein_coding	ENSG00000187556	1.11238	-1.67405	0.000656947	0.00148724	2
DNM3OS	antisense	ENSG00000230630	1.10933	3.63402	1.31712e-56	2.46645e-55	2
PHLDB1	protein_coding	ENSG00000019144	1.06688	7.81564	6.99605e-94	2.24382e-92	1
PITPNM2	protein_coding	ENSG00000090975	1.05708	4.84268	5.1965e-41	7.16143e-40	1
FARP2	protein_coding	ENSG00000006607	1.04942	5.51665	1.24521e-76	3.22548e-75	1
CAPN15	protein_coding	ENSG00000103326	1.04146	5.75483	1.9024e-42	2.71507e-41	2
MLPH	protein_coding	ENSG00000115648	1.04096	3.43226	7.71951e-36	9.54255e-35	1
C9orf3	protein_coding	ENSG00000148120	1.03547	4.35401	2.41674e-56	4.50173e-55	5
SHROOM3	protein_coding	ENSG00000138771	1.03239	6.29654	9.14237e-78	2.40704e-76	2
LIMA1	protein_coding	ENSG00000050405	1.02257	8.51413	3.31225e-73	8.13762e-72	1
MEG9	lincRNA	ENSG00000223403	1.01392	2.86309	2.79471e-05	7.50018e-05	6
DAPK3	protein_coding	ENSG00000167657	1.01052	7.03578	4.66636e-70	1.08882e-68	1
HS3ST3A1	protein_coding	ENSG00000153976	1.00668	5.05094	4.58831e-60	9.07375e-59	1
LAMB3	protein_coding	ENSG00000196878	1.00384	2.93396	3.69457e-26	3.38557e-25	1
TLE3	protein_coding	ENSG00000140332	1.00325	5.02847	8.8372e-65	1.90108e-63	1
MARF1	protein_coding	ENSG00000166783	-1.01059	5.12094	4.74001e-70	1.10454e-68	1
NHSL1	protein_coding	ENSG00000135540	-1.01267	3.31711	4.94421e-33	5.60873e-32	1
AP000662.1	sense_overlapping	ENSG00000254602	-1.05285	-0.0206459	1.63476e-07	5.51378e-07	1
EBF3	protein_coding	ENSG00000108001	-1.05782	0.572066	1.98533e-10	8.35431e-10	1
HOXC6	protein_coding	ENSG00000197757	-1.07675	-2.27581	0.00746341	0.014343	1
CIT	protein_coding	ENSG00000122966	-1.09282	3.91746	8.8696e-50	1.47743e-48	1
RIPOR3	protein_coding	ENSG00000042062	-1.13911	4.22447	2.26053e-50	3.81586e-49	1
CASC10	protein_coding	ENSG00000204682	-1.14747	1.52035	5.98302e-21	4.47205e-20	1
PANK1	protein_coding	ENSG00000152782	-1.15168	2.34442	8.82566e-34	1.02559e-32	1
EHHADH	protein_coding	ENSG00000113790	-1.1552	2.0502	2.59442e-16	1.55824e-15	1
MIR3936HG	processed_transcript	ENSG00000233006	-1.18366	-2.31056	0.00147841	0.00318311	1
TCEANC2	protein_coding	ENSG00000116205	-1.22366	3.13974	1.06113e-52	1.86996e-51	1
EZH1	protein_coding	ENSG00000108799	-1.23822	3.96441	1.13406e-67	2.53225e-66	1
TANC1	protein_coding	ENSG00000115183	-1.35244	5.09314	5.75149e-120	2.50509e-118	1
MIR503HG	lincRNA	ENSG00000223749	-1.36361	3.59744	3.27873e-65	7.08783e-64	1
HOXB4	protein_coding	ENSG00000182742	-1.39051	3.40945	3.40813e-64	7.23459e-63	1
TRIB2	protein_coding	ENSG00000071575	-1.45891	4.4085	2.15325e-90	6.56016e-89	1
DYRK1B	protein_coding	ENSG00000105204	-1.46636	3.10538	3.57475e-52	6.26202e-51	1
DDIT3	protein_coding	ENSG00000175197	-1.49027	2.46042	1.57355e-41	2.19426e-40	1
COLQ	protein_coding	ENSG00000206561	-1.52735	-2.17587	0.000119729	0.000298055	1
SLA	protein_coding	ENSG00000155926	-1.52875	-1.87316	2.21321e-05	6.01834e-05	1
HOXB3	protein_coding	ENSG00000120093	-1.69618	5.50766	7.46154e-151	4.44667e-149	1
GAB1	protein_coding	ENSG00000109458	-1.82846	4.10292	4.45391e-164	2.88849e-162	1
SH3TC2	protein_coding	ENSG00000169247	-1.85062	1.7878	1.05687e-39	1.41989e-38	1
FLVCR2	protein_coding	ENSG00000119686	-2.10268	-1.21877	1.27976e-13	6.66913e-13	1
MIR210HG	lincRNA	ENSG00000247095	-2.12194	0.239757	1.48741e-29	1.51577e-28	1
BBC3	protein_coding	ENSG00000105327	-2.2475	2.54667	2.15667e-95	7.01912e-94	1
YPEL2	protein_coding	ENSG00000175155	-2.41627	2.03221	8.31476e-105	3.043e-103	1
MTUS1	protein_coding	ENSG00000129422	-2.66424	-0.00259663	3.54197e-32	3.91236e-31	1
GDF5	protein_coding	ENSG00000125965	-2.79428	4.34069	0	0	1

## Sheet: DE-MIRHG_Q_to_6h
gene_names	gene_biotype	gene_id	logFC	logCPM	PValue	FDR	No.of_miR_hosted
MALL	protein_coding	ENSG00000144063	6.65129	-0.25897	4.60359e-99	1.16343e-97	1
SLC35F3	protein_coding	ENSG00000183780	4.97109	0.276799	2.07029e-105	5.5417e-104	1
TMCC3	protein_coding	ENSG00000057704	4.92296	-0.58819	5.61339e-66	9.3064e-65	1
SEMA7A	protein_coding	ENSG00000138623	4.41673	7.84944	0	0	1
NFATC2	protein_coding	ENSG00000101096	4.35108	2.94899	1.02975e-241	8.14562e-240	1
C3orf52	protein_coding	ENSG00000114529	4.20228	5.40881	0	0	1
SYT12	protein_coding	ENSG00000173227	4.12658	0.670834	4.02858e-82	8.42992e-81	1
ATP2B2	protein_coding	ENSG00000157087	4.00455	-3.75139	1.14909e-07	3.2012e-07	1
MIR31HG	sense_overlapping	ENSG00000171889	3.70244	2.96607	7.2916614676698e-310	9.30023e-308	1
CHST11	protein_coding	ENSG00000171310	3.65705	2.88371	1.39685e-247	1.1355e-245	1
FZD8	protein_coding	ENSG00000177283	3.37504	5.26563	0	0	1
TBC1D2	protein_coding	ENSG00000095383	3.27531	6.8767	0	0	1
DOCK2	protein_coding	ENSG00000134516	3.23627	0.990803	6.00991e-88	1.35569e-86	1
C15orf48	protein_coding	ENSG00000166920	3.19453	-0.323614	1.10295e-42	1.17488e-41	1
ASB2	protein_coding	ENSG00000100628	3.14894	0.0119577	1.6747e-36	1.53944e-35	1
AC016831.6	lincRNA	ENSG00000285106	2.7158	2.20113	1.74849e-125	5.70118e-124	2
PPARGC1B	protein_coding	ENSG00000155846	2.57216	-1.45869	4.62758e-12	1.7324e-11	1
LINC-PINT	lincRNA	ENSG00000226380	2.48999	1.78022	2.88248e-88	6.55245e-87	1
PITPNC1	protein_coding	ENSG00000154217	2.47948	4.12639	2.0877e-306	2.57532e-304	1
ARHGAP24	protein_coding	ENSG00000138639	2.38239	4.42278	5.29328e-289	5.76379e-287	1
COL17A1	protein_coding	ENSG00000065618	2.33128	-2.05833	7.20304e-10	2.34908e-09	1
GRID1	protein_coding	ENSG00000182771	2.28741	-3.61365	0.00118146	0.00224919	1
CACHD1	protein_coding	ENSG00000158966	2.09417	4.15539	4.88037e-217	3.3498e-215	1
TNS1	protein_coding	ENSG00000079308	2.08164	8.51191	1.39471e-291	1.55713e-289	1
MICAL2	protein_coding	ENSG00000133816	2.05973	8.69072	3.36911442860587e-315	4.43516257616474e-313	1
POU2F2	protein_coding	ENSG00000028277	2.01332	4.47593	4.63258e-166	2.17337e-164	1
FSTL4	protein_coding	ENSG00000053108	2.0106	-1.36031	3.60461e-12	1.3607e-11	1
AC020916.1	antisense	ENSG00000267519	1.86351	4.33016	1.4733e-68	2.53058e-67	3
PLCL2	protein_coding	ENSG00000154822	1.82474	-0.618471	2.11106e-13	8.51181e-13	1
KRT15	protein_coding	ENSG00000171346	1.71625	0.878951	4.33521e-36	3.93178e-35	1
ATP10A	protein_coding	ENSG00000206190	1.71607	6.17966	1.56372e-185	8.59315e-184	1
TNFAIP6	protein_coding	ENSG00000123610	1.68917	2.48573	4.55965e-69	7.90101e-68	1
HS3ST3A1	protein_coding	ENSG00000153976	1.68475	5.05094	3.57754e-172	1.76279e-170	1
MLPH	protein_coding	ENSG00000115648	1.65405	3.43226	2.28892e-95	5.55386e-94	1
MIR34AHG	lincRNA	ENSG00000228526	1.61239	4.69688	1.75827e-116	5.16071e-115	1
CFAP45	protein_coding	ENSG00000213085	1.61184	-0.301206	6.94586e-16	3.17422e-15	1
PRDM16	protein_coding	ENSG00000142611	1.57141	-2.89088	0.000700677	0.00137028	1
LARGE1	protein_coding	ENSG00000133424	1.55019	4.88916	1.22807e-149	5.08523e-148	1
ANKH	protein_coding	ENSG00000154122	1.53884	6.24796	2.3237e-180	1.21994e-178	1
RUNX3	protein_coding	ENSG00000020633	1.4976	-0.166866	2.9978e-12	1.13747e-11	1
MIR155HG	lincRNA	ENSG00000234883	1.49652	1.21546	7.34224e-27	5.19732e-26	1
LAMB3	protein_coding	ENSG00000196878	1.49366	2.93396	7.01631e-59	1.04007e-57	1
DOCK5	protein_coding	ENSG00000147459	1.49086	5.38117	1.08986e-122	3.43307e-121	1
JAG2	protein_coding	ENSG00000184916	1.45391	-0.122074	5.02186e-09	1.54789e-08	1
MIR137HG	lincRNA	ENSG00000225206	1.44685	0.764211	8.92027e-20	4.78715e-19	2
DOCK10	protein_coding	ENSG00000135905	1.44672	5.50039	8.08235e-125	2.62565e-123	1
NAV2	protein_coding	ENSG00000166833	1.44178	6.14407	7.76788e-42	8.11281e-41	1
B3GNT2	protein_coding	ENSG00000170340	1.38049	4.81264	5.45408e-96	1.33071e-94	1
PCED1B	protein_coding	ENSG00000179715	1.36827	0.965242	1.26228e-19	6.72101e-19	1
AC234582.1	antisense	ENSG00000231064	1.34304	-1.60313	0.000102055	0.000218955	1
CYTOR	lincRNA	ENSG00000222041	1.34008	5.01982	1.99183e-120	6.09998e-119	1
MIR17HG	processed_transcript	ENSG00000215417	1.33112	0.302897	3.2482e-12	1.22984e-11	6
TPST2	protein_coding	ENSG00000128294	1.32662	5.4991	4.23775e-112	1.19415e-110	1
CNNM4	protein_coding	ENSG00000158158	1.32658	4.02916	2.66154e-92	6.30196e-91	1
FRMD4A	protein_coding	ENSG00000151474	1.31347	6.01447	1.81702e-133	6.58157e-132	1
IL1RAPL1	protein_coding	ENSG00000169306	1.3024	-0.169064	2.56905e-11	9.20723e-11	1
AC048341.1	lincRNA	ENSG00000257354	1.29576	1.04995	1.83505e-21	1.05785e-20	1
LRWD1	protein_coding	ENSG00000161036	1.28877	4.50982	2.04182e-91	4.78322e-90	2
NOP56	protein_coding	ENSG00000101361	1.26865	6.60113	4.09762e-113	1.16396e-111	1
C16orf74	protein_coding	ENSG00000154102	1.26052	0.968966	2.94467e-23	1.8194e-22	1
UCK2	protein_coding	ENSG00000143179	1.24834	6.71088	1.00917e-112	2.85743e-111	1
NETO1	protein_coding	ENSG00000166342	1.21072	2.8527	2.14978e-45	2.43559e-44	1
CAPN15	protein_coding	ENSG00000103326	1.20732	5.75483	1.75006e-56	2.4816e-55	2
LAPTM5	protein_coding	ENSG00000162511	1.20528	-2.39251	0.00252154	0.00459314	1
NCOR2	protein_coding	ENSG00000196498	1.20132	8.07211	1.83251e-68	3.13839e-67	1
RCL1	protein_coding	ENSG00000120158	1.19775	3.5523	3.24731e-55	4.49276e-54	1
FAM83H	protein_coding	ENSG00000180921	1.19567	-0.453766	9.35824e-09	2.8267e-08	1
AMOTL2	protein_coding	ENSG00000114019	1.19288	8.15776	7.31632e-109	2.02288e-107	1
HMGA1	protein_coding	ENSG00000137309	1.17688	10.0629	2.37121e-100	6.10629e-99	1
MIR22HG	lincRNA	ENSG00000186594	1.16462	6.44286	6.02858e-102	1.5685e-100	1
TENM3	protein_coding	ENSG00000218336	1.13988	5.92129	3.51052e-82	7.35458e-81	1
OSBP2	protein_coding	ENSG00000184792	1.13461	-1.32148	4.34375e-05	9.69063e-05	1
COL27A1	protein_coding	ENSG00000196739	1.13004	6.19237	1.84637e-85	4.02097e-84	1
MYO5B	protein_coding	ENSG00000167306	1.12599	-2.12703	0.00713239	0.0121796	1
CLUH	protein_coding	ENSG00000132361	1.11885	6.19816	1.97019e-76	3.78174e-75	1
MYO1E	protein_coding	ENSG00000157483	1.11881	6.49206	2.63179e-87	5.88399e-86	1
SNX8	protein_coding	ENSG00000106266	1.11702	5.37446	6.01751e-91	1.39854e-89	1
SLC26A6	protein_coding	ENSG00000225697	1.1129	4.29804	7.32324e-11	2.553e-10	1
TNFRSF1B	protein_coding	ENSG00000028137	1.10628	3.80785	2.90966e-62	4.58271e-61	1
C7orf43	protein_coding	ENSG00000146826	1.08669	4.2558	9.77349e-57	1.39373e-55	1
RUBCN	protein_coding	ENSG00000145016	1.08268	4.60269	4.82905e-56	6.80386e-55	1
RPS6KA1	protein_coding	ENSG00000117676	1.06885	0.702799	7.67286e-13	3.00376e-12	1
BOP1	protein_coding	ENSG00000261236	1.06771	5.55033	2.46208e-86	5.43567e-85	1
PFKFB3	protein_coding	ENSG00000170525	1.05275	6.92293	1.31268e-86	2.90901e-85	1
MIR222HG	lincRNA	ENSG00000270069	1.04453	4.1565	3.79107e-26	2.61842e-25	2
PINX1	protein_coding	ENSG00000254093	1.03926	2.06195	5.74242e-22	3.36644e-21	1
SORCS2	protein_coding	ENSG00000184985	1.03351	-0.283734	4.3301e-08	1.24748e-07	2
PTPRJ	protein_coding	ENSG00000149177	1.02773	5.66823	4.63667e-79	9.27334e-78	1
SPTBN5	protein_coding	ENSG00000137877	1.00037	0.977462	1.2599e-05	2.96685e-05	1
EGFEM1P	transcribed_unitary_pseudogene	ENSG00000206120	-1.007	-1.02597	0.000694829	0.00135996	1
KIAA1217	protein_coding	ENSG00000120549	-1.02265	3.87116	3.79802e-43	4.09769e-42	1
MTMR3	protein_coding	ENSG00000100330	-1.0448	5.47866	3.92065e-74	7.26474e-73	1
PANK1	protein_coding	ENSG00000152782	-1.04921	2.34442	1.7689e-29	1.35373e-28	1
RTN1	protein_coding	ENSG00000139970	-1.05657	-1.11358	8.23045e-05	0.000178557	1
MARS	protein_coding	ENSG00000166986	-1.06449	7.43784	4.67739e-91	1.08995e-89	1
SREBF1	protein_coding	ENSG00000072310	-1.09418	5.25491	6.53227e-48	7.82807e-47	2
ANK2	protein_coding	ENSG00000145362	-1.11168	2.59092	9.04939e-34	7.73407e-33	2
MXD4	protein_coding	ENSG00000123933	-1.11593	6.36303	5.28384e-91	1.22964e-89	1
MEST	protein_coding	ENSG00000106484	-1.12734	7.04253	1.20923e-87	2.71039e-86	1
SVIL	protein_coding	ENSG00000197321	-1.13523	6.57949	1.13727e-81	2.36573e-80	2
PACSIN3	protein_coding	ENSG00000165912	-1.15239	4.30795	2.66896e-73	4.87881e-72	1
COL3A1	protein_coding	ENSG00000168542	-1.16452	10.1137	4.74918e-83	1.00571e-81	2
COLQ	protein_coding	ENSG00000206561	-1.18095	-2.17587	0.0013826	0.00260511	1
CHD2	protein_coding	ENSG00000173575	-1.18114	6.29265	9.79487e-97	2.4233e-95	1
PIEZO2	protein_coding	ENSG00000154864	-1.19758	4.66082	3.15182e-86	6.94977e-85	1
SLC6A16	protein_coding	ENSG00000063127	-1.20381	0.48191	4.7483e-11	1.67052e-10	1
ARRB1	protein_coding	ENSG00000137486	-1.21008	3.41136	3.1087e-52	4.07108e-51	1
NEURL1B	protein_coding	ENSG00000214357	-1.21715	2.98348	2.16596e-39	2.14408e-38	1
TANC1	protein_coding	ENSG00000115183	-1.26545	5.09314	1.77165e-107	4.84526e-106	1
HECW1	protein_coding	ENSG00000002746	-1.29046	1.3103	9.34337e-25	6.09756e-24	1
TENM4	protein_coding	ENSG00000149256	-1.29437	2.44273	7.20217e-40	7.20625e-39	2
ARNT2	protein_coding	ENSG00000172379	-1.29483	5.50196	4.26222e-109	1.18402e-107	1
DDIT3	protein_coding	ENSG00000175197	-1.33134	2.46042	4.4224e-35	3.89472e-34	1
EZH1	protein_coding	ENSG00000108799	-1.34475	3.96441	4.89989e-80	9.95784e-79	1
AP000662.1	sense_overlapping	ENSG00000254602	-1.35904	-0.0206459	3.27388e-11	1.16387e-10	1
CAMK1D	protein_coding	ENSG00000183049	-1.37866	4.03825	1.92765e-96	4.75576e-95	1
LDLR	protein_coding	ENSG00000130164	-1.41541	8.84289	6.26032e-152	2.66102e-150	1
SLC12A8	protein_coding	ENSG00000221955	-1.41642	2.44034	1.38542e-38	1.34649e-37	1
ANK1	protein_coding	ENSG00000029534	-1.42337	2.26272	1.40906e-41	1.46642e-40	1
FOXP2	protein_coding	ENSG00000128573	-1.44222	0.793482	3.57104e-22	2.10891e-21	1
LFNG	protein_coding	ENSG00000106003	-1.45642	0.762944	3.42825e-18	1.72586e-17	1
CFAP44	protein_coding	ENSG00000206530	-1.51451	0.0564502	3.62334e-15	1.59749e-14	1
LIFR	protein_coding	ENSG00000113594	-1.55445	6.12666	4.69976e-148	1.90583e-146	1
LPIN1	protein_coding	ENSG00000134324	-1.56859	6.24522	1.96561e-180	1.03503e-178	1
AC013394.1	protein_coding	ENSG00000279765	-1.57912	-3.13593	0.00519566	0.00905737	1
GRK5	protein_coding	ENSG00000198873	-1.59418	5.44072	9.71693e-156	4.28517e-154	1
DYRK1B	protein_coding	ENSG00000105204	-1.64656	3.10538	1.9694e-65	3.23165e-64	1
TTC28-AS1	processed_transcript	ENSG00000235954	-1.69455	1.64613	1.39136e-42	1.47675e-41	1
CLDN11	protein_coding	ENSG00000013297	-1.74098	6.36678	7.9867e-161	3.63107e-159	1
FMO3	protein_coding	ENSG00000007933	-1.74985	0.838098	2.19302e-29	1.67394e-28	1
CLYBL	protein_coding	ENSG00000125246	-1.8062	-3.13509	0.00762551	0.012979	1
NFE2L2	protein_coding	ENSG00000116044	-1.81882	7.38396	2.10728e-226	1.51107e-224	2
DHRS3	protein_coding	ENSG00000162496	-1.8299	2.57555	5.27018e-65	8.61594e-64	1
ARHGAP6	protein_coding	ENSG00000047648	-1.83303	1.81243	3.36309e-46	3.89271e-45	1
ABCA6	protein_coding	ENSG00000154262	-1.84444	-2.91815	0.000298957	0.000612285	1
FLVCR2	protein_coding	ENSG00000119686	-1.84828	-1.21877	2.10651e-12	8.06224e-12	1
MIR210HG	lincRNA	ENSG00000247095	-1.89118	0.239757	1.15146e-26	8.09879e-26	1
PDCD4	protein_coding	ENSG00000150593	-1.89553	5.77335	4.44665e-183	2.38416e-181	1
MIR3936HG	processed_transcript	ENSG00000233006	-1.9247	-2.31056	1.00671e-06	2.60768e-06	1
SOX6	protein_coding	ENSG00000110693	-2.02204	4.35813	9.90785e-177	5.05128e-175	1
BBC3	protein_coding	ENSG00000105327	-2.18898	2.54667	5.48361e-94	1.31428e-92	1
CHRM2	protein_coding	ENSG00000181072	-2.19033	7.33035	3.15046e-248	2.60911e-246	1
MLLT3	protein_coding	ENSG00000171843	-2.21345	3.93846	3.6399e-185	1.98786e-183	2
GAB1	protein_coding	ENSG00000109458	-2.25399	4.10292	7.07466e-242	5.62149e-240	1
GNAO1	protein_coding	ENSG00000087258	-2.29434	-3.39229	0.000521878	0.00103857	1
CASC10	protein_coding	ENSG00000204682	-2.54217	1.52035	4.53895e-72	8.15347e-71	1
MIR503HG	lincRNA	ENSG00000223749	-2.72619	3.59744	1.30113e-196	7.78029e-195	1
ROR2	protein_coding	ENSG00000169071	-3.0151	2.91345	5.69012e-108	1.56102e-106	1
YPEL2	protein_coding	ENSG00000175155	-3.03744	2.03221	1.11313e-147	4.50358e-146	1
FP236383.1	lincRNA	ENSG00000280441	-3.09867	-2.70565	1.81667e-06	4.60565e-06	1
MTUS1	protein_coding	ENSG00000129422	-4.03575	-0.00259663	1.68078e-53	2.26501e-52	1
SLA	protein_coding	ENSG00000155926	-4.1756	-1.87316	2.09776e-15	9.36824e-15	1
GDF5	protein_coding	ENSG00000125965	-4.90032	4.34069	0	0	1

## Sheet: DE-MIRHG_3h_to_6h
gene_names	gene_biotype	gene_id	logFC	logCPM	PValue	FDR	No.of_miR_hosted
MALL	protein_coding	ENSG00000144063	3.70992	-0.25897	2.05437e-61	9.71558e-60	1
SLC35F3	protein_coding	ENSG00000183780	3.19217	0.276799	1.37295e-64	6.99966e-63	1
FSTL4	protein_coding	ENSG00000053108	2.99304	-1.36031	8.63539e-18	8.9133e-17	1
COL17A1	protein_coding	ENSG00000065618	2.59218	-2.05833	1.28704e-10	8.05086e-10	1
HOXA9	protein_coding	ENSG00000078399	2.04092	-3.16731	0.00210435	0.00539546	1
PITPNC1	protein_coding	ENSG00000154217	1.97166	4.12639	1.91473e-199	8.23803e-197	1
ATP2B2	protein_coding	ENSG00000157087	1.91967	-3.75139	0.00138635	0.00370366	1
DOCK2	protein_coding	ENSG00000134516	1.82939	0.990803	6.20326e-38	1.51559e-36	1
PRDM16	protein_coding	ENSG00000142611	1.75179	-2.89088	0.000527901	0.0015296	1
KRT15	protein_coding	ENSG00000171346	1.65751	0.878951	1.46742e-32	2.93817e-31	1
LARGE1	protein_coding	ENSG00000133424	1.54213	4.88916	1.32472e-145	2.74919e-143	1
PDE4D	protein_coding	ENSG00000113448	1.45985	3.93837	7.34582e-60	3.3397e-58	1
SEMA7A	protein_coding	ENSG00000138623	1.41249	7.84944	6.80365e-145	1.36382e-142	1
ARHGAP24	protein_coding	ENSG00000138639	1.39618	4.42278	8.18044e-108	9.13309e-106	1
FGF14	protein_coding	ENSG00000102466	1.33385	-2.59193	0.00147841	0.0039264	2
PCED1B	protein_coding	ENSG00000179715	1.26151	0.965242	7.65395e-17	7.45119e-16	1
CHST11	protein_coding	ENSG00000171310	1.25415	2.88371	1.18594e-45	3.73571e-44	1
SH3TC2	protein_coding	ENSG00000169247	1.23673	1.7878	4.48764e-17	4.4473e-16	1
C16orf74	protein_coding	ENSG00000154102	1.21264	0.968966	8.7355e-21	1.06419e-19	1
POLM	protein_coding	ENSG00000122678	1.20691	2.62278	3.08822e-32	6.07993e-31	1
PPARGC1B	protein_coding	ENSG00000155846	1.19381	-1.45869	0.000240512	0.000739797	1
TMCC3	protein_coding	ENSG00000057704	1.17554	-0.58819	4.49475e-11	2.9225e-10	1
MIR31HG	sense_overlapping	ENSG00000171889	1.17205	2.96607	1.60944e-50	5.85373e-49	1
CACHD1	protein_coding	ENSG00000158966	1.13129	4.15539	2.43355e-69	1.36279e-67	1
WNT9A	protein_coding	ENSG00000143816	1.12367	0.719675	1.07787e-13	8.52633e-13	1
LAPTM5	protein_coding	ENSG00000162511	1.12011	-2.39251	0.00601595	0.0139303	1
TBC1D2	protein_coding	ENSG00000095383	1.11012	6.8767	2.19908e-100	2.19162e-98	1
SLC25A21	protein_coding	ENSG00000183032	1.10862	-0.426088	2.32757e-07	1.07283e-06	1
AC103702.1	sense_intronic	ENSG00000257178	1.09688	-1.76511	0.00199199	0.00514552	1
TRIB2	protein_coding	ENSG00000071575	1.09186	4.4085	6.2743e-50	2.23142e-48	1
TNFRSF1B	protein_coding	ENSG00000028137	1.08452	3.80785	1.71654e-58	7.42152e-57	1
SORCS2	protein_coding	ENSG00000184985	1.06356	-0.283734	6.0241e-08	2.93226e-07	2
CFAP45	protein_coding	ENSG00000213085	1.05566	-0.301206	2.71574e-08	1.37423e-07	1
FRMD4A	protein_coding	ENSG00000151474	1.05112	6.01447	8.53624e-87	6.57551e-85	1
DOCK5	protein_coding	ENSG00000147459	1.01562	5.38117	3.94734e-59	1.75393e-57	1
MIR646HG	lincRNA	ENSG00000228340	1.01493	-1.85839	0.00364117	0.0088447	2
AP002990.1	protein_coding	ENSG00000255508	1.01264	-1.7955	0.0105763	0.0231013	1
RUBCN	protein_coding	ENSG00000145016	1.01004	4.60269	1.57351e-48	5.3792e-47	1
SLC6A16	protein_coding	ENSG00000063127	-1.0097	0.48191	1.0171e-07	4.83213e-07	1
MAST1	protein_coding	ENSG00000105613	-1.03151	-2.44879	0.0197234	0.040264	1
TTC28-AS1	processed_transcript	ENSG00000235954	-1.06094	1.64613	1.8855e-15	1.68321e-14	1
TLE3	protein_coding	ENSG00000140332	-1.07961	5.02847	5.24591e-74	3.21312e-72	1
CLDN11	protein_coding	ENSG00000013297	-1.113	6.36678	3.58716e-67	1.94103e-65	1
DHRS3	protein_coding	ENSG00000162496	-1.11861	2.57555	1.36945e-21	1.74169e-20	1
SLC12A8	protein_coding	ENSG00000221955	-1.1206	2.44034	3.30838e-23	4.60978e-22	1
EYA2	protein_coding	ENSG00000064655	-1.12095	-0.378624	8.98586e-09	4.78739e-08	1
AATK	protein_coding	ENSG00000181409	-1.12122	-2.55992	0.00611402	0.0141277	3
AMH	protein_coding	ENSG00000104899	-1.13765	-1.15148	0.000212887	0.000660567	1
FMO3	protein_coding	ENSG00000007933	-1.15749	0.838098	4.53831e-12	3.16927e-11	1
LIFR	protein_coding	ENSG00000113594	-1.15843	6.12666	1.2728e-82	9.31625e-81	1
EGFEM1P	transcribed_unitary_pseudogene	ENSG00000206120	-1.18082	-1.02597	8.0814e-05	0.00026751	1
PFKFB3	protein_coding	ENSG00000170525	-1.19544	6.92293	1.29952e-115	1.54889e-113	1
FOXP2	protein_coding	ENSG00000128573	-1.19971	0.793482	1.35381e-14	1.13612e-13	1
SPATA13	protein_coding	ENSG00000182957	-1.20099	4.6043	1.11932e-80	7.86645e-79	1
ANK1	protein_coding	ENSG00000029534	-1.21161	2.26272	1.10578e-28	1.89931e-27	1
CAMK1D	protein_coding	ENSG00000183049	-1.25461	4.03825	3.14702e-78	2.08697e-76	1
ARHGAP6	protein_coding	ENSG00000047648	-1.26939	1.81243	1.94889e-20	2.33304e-19	1
PDCD4	protein_coding	ENSG00000150593	-1.30721	5.77335	1.16791e-87	9.15645e-86	1
MIR503HG	lincRNA	ENSG00000223749	-1.36254	3.59744	8.66747e-43	2.47402e-41	1
MTUS1	protein_coding	ENSG00000129422	-1.37071	-0.00259663	0.000118572	0.000383077	1
CASC10	protein_coding	ENSG00000204682	-1.39457	1.52035	3.38308e-18	3.58855e-17	1
NFATC2	protein_coding	ENSG00000101096	-1.41271	2.94899	3.47003e-77	2.24217e-75	1
FILIP1L	protein_coding	ENSG00000168386	-1.43185	7.97682	3.35149e-108	3.76562e-106	1
JAG2	protein_coding	ENSG00000184916	-1.43203	-0.122074	1.14978e-13	9.07072e-13	1
NFE2L2	protein_coding	ENSG00000116044	-1.53425	7.38396	9.2857e-163	2.34e-160	2
CHRM2	protein_coding	ENSG00000181072	-1.55581	7.33035	1.77169e-129	2.64853e-127	1
PIM3	protein_coding	ENSG00000198355	-1.60495	4.66707	2.92839e-162	7.17457e-160	1
JAG1	protein_coding	ENSG00000101384	-1.61576	5.29501	4.9334e-157	1.14507e-154	1
TNFRSF13C	protein_coding	ENSG00000159958	-1.68888	-2.85168	0.00166837	0.00438469	1
LDLR	protein_coding	ENSG00000130164	-1.82366	8.84289	1.06324e-245	7.8148e-243	1
MLLT3	protein_coding	ENSG00000171843	-1.90478	3.93846	1.3706e-122	1.79092e-120	2
CLYBL	protein_coding	ENSG00000125246	-1.96192	-3.13509	0.00518474	0.0121848	1
GDF5	protein_coding	ENSG00000125965	-2.10598	4.34069	6.11704e-105	6.50028e-103	1
SOX6	protein_coding	ENSG00000110693	-2.16844	4.35813	2.35911e-203	1.12472e-200	1
LFNG	protein_coding	ENSG00000106003	-2.22144	0.762944	8.06317e-45	2.47795e-43	1
ROR2	protein_coding	ENSG00000169071	-2.34527	2.91345	6.51092e-63	3.21716e-61	1
FP236383.1	lincRNA	ENSG00000280441	-2.44376	-2.70565	0.00154012	0.00407313	1
SLA	protein_coding	ENSG00000155926	-2.64102	-1.87316	0.000185187	0.000579303	1
MIR3142HG	lincRNA	ENSG00000253522	-3.49239	-4.13465	3.43342e-05	0.000120361	2
