# Supplementary material
Source: HighWire-hosted journal article supplement (doi:10.1101/rna.075309.120)
Supplement: Supplementary_Table_6_DEG_MIR222HGkd.xlsx [file Supplementary_Table_6_DEG_MIR222HGkd.xlsx]

## Sheet: Sheet1
gene_names	biotype	genes	logCPM	logFC.NC_S_vs_6h	Pvalue.NC_S_vs_6h	FDR.NC_S_vs_6h	logFC.NC_vs_sh1_6h	Pvalue.NC_vs_sh1_6h	FDR.NC_vs_sh1_6h	logFC.NC_vs_sh2_6h	Pvalue.NC_vs_sh2_6h	FDR.NC_vs_sh2_6h	logFC.NC_vs_sh1_S	Pvalue.NC_vs_sh1_S	FDR.NC_vs_sh1_S	logFC.NC_vs_sh2_S	Pvalue.NC_vs_sh2_S	FDR.NC_vs_sh2_S
CYP26B1	protein_coding	ENSG00000003137	0.247142	-0.981463	0.000213548	0.00051395	-1.41708	0.000159684	0.00389667	-1.89952	4.72e-06	0.000155763	-2.1103	1.47e-13	2.83e-11	-1.67997	1.5e-09	7.97e-08
TFPI	protein_coding	ENSG00000003436	7.83977	-0.317575	0.00257696	0.00519344	-0.40385	0.000139576	0.00348144	-0.487835	4.46e-06	0.000148993	0.101775	0.331428	0.655623	-0.172148	0.101203	0.254688
SLC7A2	protein_coding	ENSG00000003989	6.8864	2.21624	2.87e-71	1.74e-69	-1.23704	1.06e-24	7.59e-22	-0.622456	1.75e-07	9.33e-06	-0.296568	0.0156389	0.109667	-1.01028	7.43e-16	1.14e-13
PRKAR2B	protein_coding	ENSG00000005249	3.35902	-0.298589	0.0617631	0.0935467	-0.783569	4.13e-06	0.000178545	-1.01007	7.28e-09	5.31e-07	-0.522513	0.000862736	0.0135325	-1.05418	9.34e-11	6.24e-09
OSBPL7	protein_coding	ENSG00000006025	1.22229	-1.59155	5.02e-11	2.47e-10	-1.00259	0.00349788	0.0413608	-1.5228	4.61e-05	0.00105419	-0.420607	0.0401159	0.201711	-1.30397	6.44e-09	2.86e-07
KDM7A	protein_coding	ENSG00000006459	4.94035	2.30873	8.61e-49	2.76e-47	-0.63483	1.7e-05	0.000588822	-0.707802	1.87e-06	7.33e-05	-0.536771	0.00102151	0.0154689	-0.27439	0.0937686	0.241925
PHTF2	protein_coding	ENSG00000006576	6.31556	0.479967	2.58e-05	7.09e-05	-1.4667	6.69e-36	2.11e-32	-1.58036	7.04e-41	1.85e-37	-0.959579	1.22e-16	3.15e-14	-0.821803	1.29e-12	1.13e-10
DCN	protein_coding	ENSG00000011465	12.8869	-0.198295	0.0797705	0.117568	-0.850534	8.43e-14	1.33e-11	-0.83271	2.7e-13	4.13e-11	-0.770598	1.27e-11	1.76e-09	-0.827184	3.81e-13	3.81e-11
TMEM159	protein_coding	ENSG00000011638	4.67122	-0.913758	2.29e-15	1.57e-14	-1.92588	6.46e-44	2.55e-40	-0.407297	0.00106473	0.0137351	-1.09116	8.31e-22	4.37e-19	-0.0932798	0.400412	0.624218
CALCOCO1	protein_coding	ENSG00000012822	6.41172	-1.36374	1.04e-46	3.07e-45	0.29816	0.00232492	0.0308833	0.43986	7.09e-06	0.000218786	0.315139	0.000466802	0.00824963	0.112616	0.214272	0.420375
MAP4K5	protein_coding	ENSG00000012983	6.98743	0.1107	0.23345	0.301056	-0.474493	4.15e-07	2.36e-05	-0.287169	0.0021645	0.0236198	-0.303834	0.00106403	0.0160013	-0.22679	0.0147129	0.06329
MAMLD1	protein_coding	ENSG00000013619	5.36014	0.538604	8.51e-05	0.000217578	-0.572445	3.25e-05	0.00105389	-0.751323	6.58e-08	3.83e-06	-0.694127	6.03e-07	2.92e-05	-0.34924	0.0117075	0.0537568
SNAI2	protein_coding	ENSG00000019549	6.28478	-1.49538	2.76e-35	5.27e-34	0.448618	0.000237893	0.00538042	0.478559	9.52e-05	0.00196383	0.210404	0.0680824	0.281177	0.0338614	0.770895	0.904532
HSD17B6	protein_coding	ENSG00000025423	1.90543	-0.171878	0.382756	0.461015	-1.65062	1.71e-12	2.24e-10	-1.24894	4.17e-08	2.61e-06	-1.80826	8.84e-17	2.4e-14	-1.51345	1.52e-12	1.32e-10
BTN3A1	protein_coding	ENSG00000026950	4.33407	-1.73291	9.08e-36	1.76e-34	-0.692163	1.13e-05	0.000420574	-0.56381	0.000345601	0.00563398	-0.352812	0.00543671	0.0520532	-0.553351	1.55e-05	0.000251423
POU2F2	protein_coding	ENSG00000028277	1.62025	3.47702	8.97e-20	8.09e-19	-1.47029	1.05e-05	0.000398456	-1.06513	0.00122953	0.0152497	0.904652	0.0250031	0.149482	0.32375	0.470154	0.686823
DAPK2	protein_coding	ENSG00000035664	2.02563	-0.241343	0.229904	0.296909	-1.04353	3.86e-06	0.000169242	-0.927614	5.74e-05	0.00127535	-0.134743	0.486535	0.780484	-0.409	0.0368907	0.124103
RAB27B	protein_coding	ENSG00000041353	2.24764	-0.063989	0.801268	0.850166	0.895392	0.000220393	0.00502064	0.879714	0.000310732	0.00520551	0.730696	0.00154533	0.0213502	0.298342	0.219842	0.426954
JADE2	protein_coding	ENSG00000043143	4.90444	-1.39957	1.56e-22	1.68e-21	0.503772	0.000664356	0.0119965	0.413981	0.00544609	0.0466842	0.337573	0.0110394	0.0861509	0.0697508	0.604837	0.792375
FAM214A	protein_coding	ENSG00000047346	4.52676	-2.42484	1.95e-57	8.01e-56	0.528274	0.0015799	0.0233854	0.829334	5.43e-07	2.53e-05	0.429919	0.000722694	0.011818	0.170639	0.184684	0.381141
FSTL4	protein_coding	ENSG00000053108	-1.16333	0.813812	0.240071	0.308609	-2.18086	0.00332685	0.0401722	-2.14227	0.00542985	0.0466666	-1.38038	0.0649527	0.273847	-2.18817	0.00642613	0.0337897
KMT2C	protein_coding	ENSG00000055609	6.40508	0.0077444	0.946648	0.970536	0.462701	5.51e-05	0.00165954	0.360215	0.00175697	0.0200412	0.228051	0.0447741	0.216471	0.25343	0.0261701	0.0966601
PRDM1	protein_coding	ENSG00000057657	3.79691	3.03529	9.93e-79	6.87e-77	-0.519141	0.000178204	0.00422438	-0.740782	1.5e-07	8.07e-06	-0.0270426	0.916416	0.999335	0.19012	0.31633	0.53934
PARP12	protein_coding	ENSG00000059378	3.17395	0.522385	0.00195153	0.00402458	-0.613558	0.000347977	0.00721777	-0.761349	1.41e-05	0.000391856	-0.284218	0.0961559	0.340528	-0.370387	0.031519	0.110912
SLC2A3	protein_coding	ENSG00000059804	6.31045	0.0996623	0.614136	0.685688	-1.26081	3.68e-10	3.7e-08	-0.720549	0.000294068	0.00496858	-0.718272	0.00029427	0.0057129	-0.0885569	0.654336	0.82746
WNK1	protein_coding	ENSG00000060237	7.85672	-0.31925	0.000991415	0.00214709	0.427321	1.08e-05	0.000407004	0.278798	0.00416217	0.0385502	0.268866	0.00515868	0.050636	0.290395	0.00254858	0.0165197
SPEN	protein_coding	ENSG00000065526	5.81235	0.0896468	0.401601	0.480446	0.348657	0.00106227	0.0171751	0.299973	0.00507964	0.0442406	0.257339	0.0142986	0.103586	0.173091	0.10209	0.255905
FAM107B	protein_coding	ENSG00000065809	7.83058	1.95993	2.89e-61	1.35e-59	-0.723187	3.26e-10	3.31e-08	-0.499964	1.32e-05	0.000370514	-0.329982	0.00461914	0.0474063	-0.28608	0.014224	0.0619481
PLPP1	protein_coding	ENSG00000067113	4.47948	-1.02096	1.72e-16	1.27e-15	-0.81786	2.07e-09	1.86e-07	-0.420574	0.00185292	0.0208639	-0.599354	5.28e-07	2.6e-05	-0.630944	1.57e-07	4.73e-06
CBFB	protein_coding	ENSG00000067955	7.0446	2.51385	3.77e-115	6.67e-113	0.385146	0.0001908	0.00448253	0.288295	0.0053017	0.04577	0.372714	0.000708978	0.0116663	0.264866	0.0170763	0.070728
MAST4	protein_coding	ENSG00000069020	5.46953	-0.16176	0.133747	0.185777	0.441001	4.17e-05	0.00131659	0.395904	0.000258137	0.00452141	0.171261	0.102992	0.353488	0.321838	0.00216814	0.0146811
RORA	protein_coding	ENSG00000069667	3.56594	-0.00521746	0.989074	1	-0.486903	0.00430212	0.0482352	-0.485649	0.00461058	0.0411791	0.0635307	0.701866	0.914087	-0.143166	0.388969	0.613913
OSBPL3	protein_coding	ENSG00000070882	6.42469	-0.281746	0.00403427	0.00785623	0.603404	7e-10	6.72e-08	0.403784	4.4e-05	0.00101642	0.868657	5.61e-20	2.33e-17	0.813723	1.22e-17	2.25e-15
TFRC	protein_coding	ENSG00000072274	8.41513	0.694201	5.24e-14	3.23e-13	-0.978399	5.95e-26	5.52e-23	-0.344203	0.000183691	0.00342687	-1.38989	2.73e-49	2.15e-45	-0.236261	0.0104171	0.0489025
PLXNA2	protein_coding	ENSG00000076356	5.17905	3.57882	1.94e-85	1.63e-83	0.770831	4.67e-07	2.64e-05	0.644835	2.56e-05	0.000653274	0.554181	0.00413361	0.0434125	0.486343	0.0130133	0.0578027
MCAM	protein_coding	ENSG00000076706	5.85723	-0.177864	0.137996	0.190741	-0.735786	1.85e-09	1.7e-07	-0.578185	2.33e-06	8.78e-05	-0.88624	2.16e-13	4.03e-11	-0.643247	9.44e-08	3.04e-06
GPC4	protein_coding	ENSG00000076716	4.86744	-0.963922	5.01e-15	3.35e-14	-1.28428	2.09e-21	1.06e-18	-0.620206	2.48e-06	9.25e-05	-1.34653	7.42e-28	8.99e-25	-0.814372	1.95e-11	1.47e-09
N4BP2	protein_coding	ENSG00000078177	3.43511	0.0820757	0.607368	0.679672	-0.977337	4.9e-09	4.11e-07	-0.565534	0.000602032	0.00890284	-0.712284	8.4e-06	0.000294122	-0.916235	2.11e-08	8.11e-07
SLC1A3	protein_coding	ENSG00000079215	-0.238121	1.28469	0.000394465	0.000910047	-1.83384	5.24e-06	0.00021899	-1.53595	0.000121885	0.00243523	-0.322753	0.50233	0.792131	-0.18734	0.699125	0.859338
MOXD1	protein_coding	ENSG00000079931	6.18922	-0.203325	0.0503916	0.0779562	-1.12649	9.49e-26	8.31e-23	-0.969914	1.78e-19	5.43e-17	-0.819919	4.15e-15	9.22e-13	-0.699986	2.05e-11	1.53e-09
KCNN2	protein_coding	ENSG00000080709	0.869234	-3.30989	5.79e-07	1.95e-06	2.28045	0.00192745	0.0271774	2.45603	0.00128746	0.0156722	1.70788	3.52e-06	0.000143216	2.19843	1.84e-09	9.5e-08
STK17B	protein_coding	ENSG00000081320	5.48034	0.873012	3.75e-17	2.9e-16	-0.816207	5.63e-15	1.06e-12	-0.32399	0.00172516	0.0197625	-0.277734	0.00873365	0.0735063	0.255963	0.014368	0.0622931
CDC14B	protein_coding	ENSG00000081377	5.60775	0.460685	1.56e-05	4.39e-05	-0.79841	1.81e-13	2.72e-11	-0.371737	0.000557407	0.00834469	-0.632573	5.47e-09	4.49e-07	-0.320072	0.00306144	0.0190904
BZW1	protein_coding	ENSG00000082153	8.95362	1.50894	2.48e-58	1.06e-56	-0.422438	4.19e-06	0.000180589	-0.333674	0.000277322	0.00477783	0.0038976	0.96675	1	0.0942664	0.307545	0.529503
ABCB1	protein_coding	ENSG00000085563	1.38288	2.09268	5.39e-18	4.39e-17	-1.08804	1.53e-06	7.64e-05	-0.675648	0.00231055	0.0248625	-0.0775517	0.839897	0.972109	0.0789082	0.839897	0.945926
KLHL42	protein_coding	ENSG00000087448	5.88738	0.668545	5.97e-13	3.39e-12	-0.913648	2.99e-22	1.63e-19	-0.94046	3.18e-23	1.47e-20	-0.883364	2.27e-20	1.04e-17	-0.904527	5.26e-21	1.46e-18
YPEL3	protein_coding	ENSG00000090238	2.39927	-2.58276	1.23e-26	1.6e-25	1.10992	8.2e-05	0.00226739	1.19218	4.2e-05	0.000983475	0.412238	0.0183873	0.122977	0.273776	0.124106	0.291262
P3H2	protein_coding	ENSG00000090530	7.42632	3.13878	1.36e-145	4.36e-143	-0.945434	7.99e-17	1.85e-14	-0.665338	3.93e-09	3.1e-07	-0.798415	3.05e-11	3.91e-09	-0.384092	0.0012839	0.0096441
NRCAM	protein_coding	ENSG00000091129	0.598354	2.38251	4.57e-10	2.09e-09	-1.30007	0.000247798	0.0055487	-1.2202	0.000724954	0.0103038	-1.41674	0.00492799	0.0494735	-0.419247	0.440251	0.659614
ITGA6	protein_coding	ENSG00000091409	7.21455	2.51149	1.33e-110	2.09e-108	0.615536	5.17e-09	4.24e-07	0.316155	0.00272198	0.0279325	1.07977	1.99e-22	1.12e-19	0.856188	1.54e-14	1.94e-12
CDV3	protein_coding	ENSG00000091527	8.72445	1.1997	8.58e-31	1.34e-29	-0.426239	3.33e-05	0.00107441	-0.422259	3.97e-05	0.000936943	-0.427451	3.5e-05	0.000986118	0.0784656	0.446101	0.664933
SIRT1	protein_coding	ENSG00000096717	5.06805	1.11916	1.13e-24	1.35e-23	-1	7.99e-20	3.07e-17	-0.743133	1.18e-11	1.45e-09	-0.858794	8.23e-14	1.6e-11	-0.326882	0.00398607	0.0232981
ERMP1	protein_coding	ENSG00000099219	4.39358	-0.448853	0.00294048	0.00585719	-0.719097	5.22e-06	0.0002189	-0.595381	0.00017621	0.00331302	-0.4234	0.00444951	0.046145	-0.622505	3.4e-05	0.000490141
NRP1	protein_coding	ENSG00000099250	7.42611	1.61397	2.73e-64	1.4e-62	-0.853176	8.5e-20	3.19e-17	-0.2874	0.00198316	0.022078	-0.131256	0.167562	0.463656	0.395434	2.94e-05	0.000433129
MTAP	protein_coding	ENSG00000099810	6.29193	2.17315	1.24e-98	1.45e-96	-0.354594	0.000306854	0.00658588	-0.373632	0.000148984	0.00287113	-0.0342941	0.753693	0.935549	0.231469	0.0281848	0.102116
NDRG3	protein_coding	ENSG00000101079	5.65234	-0.844801	1.16e-13	6.99e-13	0.378178	0.00111962	0.0179549	0.355113	0.00233755	0.0250483	0.319685	0.00334851	0.0371732	0.342966	0.00170182	0.0121227
RASSF2	protein_coding	ENSG00000101265	5.48835	-1.74705	2.68e-36	5.29e-35	-1.08252	2.23e-13	3.29e-11	-1.12897	4.42e-14	7.41e-12	-0.81872	9.65e-10	9.11e-08	-0.88917	3.58e-11	2.52e-09
CSNK2A1	protein_coding	ENSG00000101266	7.1247	0.392176	5.65e-05	0.000148223	-0.298684	0.00221372	0.0299803	-0.277287	0.00458775	0.0410683	-0.382686	8.97e-05	0.0021681	-0.228319	0.0194156	0.077505
JAG1	protein_coding	ENSG00000101384	4.90452	-0.99317	4.49e-19	3.88e-18	-0.601672	6.06e-07	3.32e-05	-1.09639	5.28e-18	1.46e-15	-0.345077	0.00123471	0.0180056	-0.415337	0.000111336	0.00133977
CEP192	protein_coding	ENSG00000101639	4.76661	-1.5028	7.32e-26	9.25e-25	0.46938	0.00151278	0.0227336	0.504848	0.000712323	0.0101529	0.214426	0.101922	0.351499	0.0123402	0.929429	0.990889
MIB1	protein_coding	ENSG00000101752	6.26381	0.415422	0.00020085	0.000485836	-0.530033	2.46e-06	0.000111858	-0.374048	0.000873038	0.0118337	-0.514994	4.81e-06	0.000185041	-0.420305	0.000192187	0.00209374
SRPX	protein_coding	ENSG00000101955	5.85905	-0.224539	0.0209007	0.0352949	0.428701	1.07e-05	0.000405256	0.340215	0.000536584	0.00810221	0.397303	2.39e-05	0.000714127	0.310308	0.00103725	0.00811069
DNAJC3	protein_coding	ENSG00000102580	6.57974	0.263646	0.0543084	0.0833691	-0.424237	0.00205191	0.0284989	-0.761613	3.98e-08	2.52e-06	-0.201008	0.142518	0.424458	-0.580659	2.53e-05	0.000381799
FLT1	protein_coding	ENSG00000102755	5.99566	3.03668	8.48e-41	2.03e-39	-1.35057	2.69e-10	2.79e-08	-0.621264	0.00321085	0.0319342	-0.59504	0.00693547	0.0627616	0.871856	5.68e-05	0.000758036
RGCC	protein_coding	ENSG00000102760	5.76051	-1.08926	9.81e-17	7.35e-16	-1.16579	3.75e-17	9.25e-15	-1.53154	6.54e-27	4.3e-24	-0.518035	5.4e-05	0.00141224	0.133942	0.293646	0.513022
MEDAG	protein_coding	ENSG00000102802	5.32673	4.69424	3.83e-154	1.59e-151	-0.894556	7.44e-10	7.11e-08	-1.73257	4.15e-31	3.27e-28	0.578142	0.00143743	0.0201419	-0.543204	0.00707546	0.0364145
TSC22D1	protein_coding	ENSG00000102804	6.59754	-0.235992	0.0254386	0.0422031	-0.507925	2.09e-06	9.82e-05	-0.454163	2.31e-05	0.000597338	-0.0373319	0.722665	0.921238	-0.207186	0.0485537	0.15123
NFAT5	protein_coding	ENSG00000102908	7.47979	-0.289267	0.0192344	0.0327512	0.397508	0.00131018	0.0203484	0.510704	3.73e-05	0.000885907	0.451662	0.000230875	0.00467203	0.47248	0.000118798	0.00140766
NME3	protein_coding	ENSG00000103024	0.251069	-2.35902	6.03e-07	2.03e-06	1.70849	0.000797362	0.0138585	1.50349	0.00542554	0.0466666	0.0935183	0.826718	0.965191	-1.00496	0.00827331	0.0411162
WFDC1	protein_coding	ENSG00000103175	4.45991	-0.373187	0.0339922	0.054785	-1.22988	2.91e-11	3.4e-09	-0.669484	0.000228137	0.00410075	-1.26568	1.67e-12	2.59e-10	-0.834189	2.36e-06	4.97e-05
FOXF1	protein_coding	ENSG00000103241	6.41583	0.298673	0.00225729	0.00460157	-0.625745	2.44e-10	2.56e-08	-0.816647	2.63e-16	6.28e-14	-0.425483	1.47e-05	0.000473503	-0.720701	3.87e-13	3.81e-11
IGDCC4	protein_coding	ENSG00000103742	3.85511	-0.89465	6.43e-09	2.66e-08	-0.557376	0.000699836	0.0125652	-0.999942	6.01e-09	4.45e-07	-0.438195	0.00307502	0.0350757	-0.945401	5.29e-10	3.12e-08
TRPA1	protein_coding	ENSG00000104321	7.70624	-1.30072	4.97e-05	0.000131414	-1.03253	0.00122672	0.0192994	-1.87641	9.49e-09	6.8e-07	-0.530019	0.093665	0.336034	-1.55325	1.48e-06	3.36e-05
SFRP1	protein_coding	ENSG00000104332	10.2945	0.173861	0.115521	0.16353	1.06026	1.8e-21	9.48e-19	1.43095	3.6e-37	5.17e-34	1.52074	1.25e-41	4.94e-38	1.61052	2.98e-46	6.72e-43
SLC39A14	protein_coding	ENSG00000104635	6.84132	1.67325	6.87e-44	1.84e-42	-0.746947	2.32e-10	2.46e-08	-0.698485	3.16e-09	2.56e-07	-0.59907	6.76e-07	3.22e-05	-0.111448	0.353816	0.579787
KCTD9	protein_coding	ENSG00000104756	7.18567	1.64064	8.54e-59	3.73e-57	-0.398328	5.58e-05	0.00166652	-0.353331	0.00035572	0.00577505	-0.163052	0.10809	0.362614	0.11584	0.252816	0.465529
ASAH1	protein_coding	ENSG00000104763	6.32632	-0.105347	0.278817	0.35179	-0.582048	4.05e-09	3.49e-07	-0.346671	0.000450558	0.0069565	-0.263814	0.0062992	0.0580705	-0.268776	0.00553102	0.0301178
NOP53	protein_coding	ENSG00000105373	4.86347	-1.17027	3.9e-16	2.82e-15	0.623216	2.06e-05	0.000695099	0.437681	0.00309722	0.0310157	-0.0475338	0.728145	0.923524	-0.277389	0.0440723	0.141153
RAB3A	protein_coding	ENSG00000105649	1.31426	1.94463	2.27e-15	1.56e-14	-1.05478	5.19e-06	0.000218131	-0.670682	0.00356278	0.034267	-0.120888	0.687512	0.906689	0.167058	0.601165	0.789731
STEAP1B	protein_coding	ENSG00000105889	2.94515	2.14424	7.5e-36	1.46e-34	-0.524219	0.000738238	0.0131054	-0.615093	9.23e-05	0.00191606	0.00678618	1	1	-0.0456031	0.846651	0.948855
PTN	protein_coding	ENSG00000105894	6.02671	-0.188263	0.0592616	0.0900955	-0.564311	2.98e-08	2.17e-06	-0.834408	6.52e-16	1.45e-13	-0.572754	9.02e-09	6.8e-07	-0.915425	1.22e-19	2.83e-17
H2AFV	protein_coding	ENSG00000105968	6.12835	-0.0219637	0.828435	0.8722	-0.362923	0.000318002	0.0067574	-0.283242	0.00504067	0.0439838	-0.209987	0.0337629	0.181589	-0.0457924	0.645631	0.821281
WNT2	protein_coding	ENSG00000105989	5.52486	-1.44766	2.08e-43	5.49e-42	-0.52469	2.42e-06	0.000110061	-0.55394	9.2e-07	3.96e-05	-0.995381	1.29e-22	8.15e-20	-0.969236	2.19e-21	6.16e-19
TSPAN13	protein_coding	ENSG00000106537	3.86602	3.20152	3.06e-61	1.42e-59	0.792796	1.65e-07	1.03e-05	0.931393	8.85e-10	8.21e-08	0.862899	0.000102355	0.00242353	1.63836	3.6e-15	4.89e-13
TGFBR1	protein_coding	ENSG00000106799	7.55075	-0.859988	2.96e-14	1.86e-13	-0.457759	5.83e-05	0.00171328	-0.396607	0.000502923	0.00765259	-0.513878	4.6e-06	0.000179092	-0.0702612	0.530219	0.736355
ECM2	protein_coding	ENSG00000106823	0.774102	-0.430503	0.108613	0.154739	-1.60003	1.96e-06	9.26e-05	-1.08109	0.000811297	0.0112285	-1.45172	2.67e-07	1.42e-05	-1.06923	0.000109385	0.00132348
CXCL12	protein_coding	ENSG00000107562	5.65282	3.03334	6.06e-24	6.95e-23	-0.828245	0.00296807	0.0369871	-1.55149	4.56e-08	2.8e-06	-0.41001	0.152234	0.440724	-1.31088	8.13e-06	0.000146547
MAPK8	protein_coding	ENSG00000107643	6.09151	1.64301	9.2e-55	3.59e-53	-0.461734	6.84e-06	0.000281302	-1.68202	6.16e-56	3.24e-52	-0.223587	0.0368327	0.192326	-0.946178	8.86e-18	1.68e-15
ANKRD26	protein_coding	ENSG00000107890	4.55433	-0.742111	2.87e-08	1.12e-07	0.477758	0.000461121	0.00896315	0.460796	0.0008189	0.0112842	0.285794	0.0227214	0.141016	0.113424	0.373214	0.598145
MAP3K8	protein_coding	ENSG00000107968	1.7775	1.83665	3.57e-19	3.11e-18	-0.835506	1.49e-05	0.00053272	-1.62753	1.68e-14	3.05e-12	-0.786272	0.00177491	0.0236301	-0.846682	0.00106012	0.00826907
TSPAN14	protein_coding	ENSG00000108219	5.69805	0.385049	0.000732144	0.00161941	0.540139	1.54e-06	7.64e-05	0.416801	0.000224876	0.00404674	0.154192	0.174867	0.475159	0.228407	0.0444803	0.142113
CCL2	protein_coding	ENSG00000108691	5.22034	0.224671	0.0742341	0.110409	-0.990801	1.75e-14	3.03e-12	-1.26089	7.67e-22	2.95e-19	0.0996411	0.42621	0.738542	-0.694346	5.65e-08	1.93e-06
EZH1	protein_coding	ENSG00000108799	4.99519	-2.09545	2.06e-49	6.72e-48	0.577274	0.000103852	0.00274685	0.717034	1.55e-06	6.24e-05	0.139162	0.27077	0.592507	0.204739	0.106161	0.262843
SMURF2	protein_coding	ENSG00000108854	9.02409	0.60196	1.31e-07	4.77e-07	0.365388	0.00130478	0.0203246	0.389558	0.000612952	0.00902201	0.316626	0.00537813	0.0518451	0.563064	7.76e-07	1.91e-05
TMEM97	protein_coding	ENSG00000109084	5.14251	-1.26283	5.26e-17	4.01e-16	-0.738004	2.78e-06	0.000124522	-0.600354	0.000148915	0.00287113	-0.660483	7.02e-06	0.000255311	-0.577144	8.69e-05	0.00109642
PMP22	protein_coding	ENSG00000109099	6.76499	-1.52765	1.94e-48	6.15e-47	-0.356508	0.00074671	0.013197	-1.0458	5.75e-22	2.27e-19	-0.774901	2.67e-14	5.47e-12	-1.22032	2.41e-32	2.23e-29
AREG	protein_coding	ENSG00000109321	5.48919	4.99038	1.64e-164	8.62e-162	-1.47405	8.9e-23	5.01e-20	-1.58878	6.43e-26	3.75e-23	0.0830374	0.690385	0.907768	-1.26238	7.16e-09	3.15e-07
INPP4B	protein_coding	ENSG00000109452	5.04242	-0.48854	5.21e-05	0.000137176	0.796258	4.61e-11	5.31e-09	1.09595	1.14e-19	3.58e-17	0.279226	0.0151084	0.107429	0.447047	9.95e-05	0.00122271
CPE	protein_coding	ENSG00000109472	4.14801	0.00457169	0.986089	1	-0.584798	0.00263436	0.0337352	-0.785705	6.4e-05	0.00139561	-0.450447	0.0183471	0.12287	-0.666066	0.000567409	0.00497477
GRPEL1	protein_coding	ENSG00000109519	5.4298	2.05547	7.71e-79	5.35e-77	-0.870406	1.9e-16	4.15e-14	-1.13581	3.11e-26	1.88e-23	-0.818861	3.78e-12	5.68e-10	-0.672538	1.28e-08	5.17e-07
GALNT7	protein_coding	ENSG00000109586	6.33168	-0.272665	0.0138924	0.0243712	0.411449	0.0002124	0.00488799	0.99828	1.79e-19	5.43e-17	0.665535	7.17e-10	7.02e-08	1.06256	8.77e-23	2.77e-20
KLHL5	protein_coding	ENSG00000109790	7.93663	0.286303	0.0276297	0.0454555	-0.621335	1.95e-06	9.25e-05	-0.437052	0.000799488	0.0111237	-0.553534	2.18e-05	0.000658598	-0.514186	8.05e-05	0.0010277
CTSC	protein_coding	ENSG00000109861	8.46012	-0.532826	2.09e-07	7.43e-07	-0.541254	1.57e-07	9.95e-06	-0.342364	0.000891702	0.0119632	-0.522107	3.46e-07	1.8e-05	-0.38098	0.000197408	0.00214026
HIPK3	protein_coding	ENSG00000110422	7.18742	0.547619	1.03e-07	3.79e-07	-0.421062	4.37e-05	0.00137635	-0.323886	0.00167764	0.0193321	-0.597932	7.98e-09	6.13e-07	-0.48383	3.05e-06	6.19e-05
MDK	protein_coding	ENSG00000110492	4.76305	-0.670295	5.43e-08	2.06e-07	-0.460386	0.000346534	0.00719731	-0.7978	1.76e-09	1.47e-07	-0.742761	1.03e-09	9.54e-08	-1.12727	1.13e-19	2.65e-17
SLC11A2	protein_coding	ENSG00000110911	5.54441	-0.447217	3.18e-05	8.62e-05	-0.395655	0.000356138	0.00733913	-0.489216	1.28e-05	0.000362261	-0.206974	0.0502205	0.233395	-0.395941	0.000199205	0.00215562
ALDH2	protein_coding	ENSG00000111275	5.32757	-0.676048	2.25e-10	1.05e-09	-0.365658	0.000990303	0.0163126	-0.458565	4.65e-05	0.00106172	-0.38957	0.000181161	0.00386967	-0.527086	5.15e-07	1.33e-05
VDR	protein_coding	ENSG00000111424	3.65927	-0.745489	4.91e-05	0.000130043	0.810803	1.2e-05	0.000441578	0.599325	0.00148591	0.0174936	1.05791	2.52e-10	2.71e-08	0.323826	0.0587647	0.174359
COL12A1	protein_coding	ENSG00000111799	11.7549	-0.192379	0.0628746	0.094948	-0.593718	1.06e-08	8.36e-07	-0.46161	8.44e-06	0.000254385	-0.595443	9.49e-09	7.12e-07	-0.536561	2.28e-07	6.55e-06
FRK	protein_coding	ENSG00000111816	1.08784	0.953913	0.00010425	0.000263239	-1.39989	1.45e-07	9.25e-06	-1.49717	6.32e-08	3.69e-06	0.358589	0.163694	0.457612	-0.2291	0.431354	0.651869
UST	protein_coding	ENSG00000111962	5.83054	0.727484	6.07e-15	4.02e-14	-0.370398	6.93e-05	0.00197652	-0.873361	4.35e-20	1.43e-17	-0.0667917	0.480178	0.775724	-0.30198	0.00152001	0.0110766
BMP5	protein_coding	ENSG00000112175	1.08285	-3.00933	3.85e-13	2.23e-12	-2.22722	0.000284712	0.00619062	-3.91082	1.63e-06	6.53e-05	-1.57059	1.52e-05	0.000485684	-2.27023	3.23e-09	1.55e-07
HECA	protein_coding	ENSG00000112406	4.29407	-1.58433	5.32e-30	8.05e-29	0.466451	0.00185544	0.0264458	0.806028	6.13e-08	3.59e-06	0.545903	5.05e-06	0.000192391	0.342388	0.00477719	0.0269244
ADGRG6	protein_coding	ENSG00000112414	5.65968	1.22384	5.54e-25	6.73e-24	-0.748308	1.99e-10	2.12e-08	-0.405268	0.000541877	0.00816649	-1.03411	4.95e-17	1.39e-14	-0.584021	1.72e-06	3.78e-05
C7	protein_coding	ENSG00000112936	6.39601	-0.291586	0.203395	0.267371	-1.94451	3.06e-16	6.44e-14	-2.54693	1.5e-25	8.13e-23	-1.95307	1.91e-16	4.77e-14	-2.69053	3.35e-28	1.71e-25
HBEGF	protein_coding	ENSG00000113070	6.14594	5.25117	9.43e-92	9.47e-90	-0.757278	0.000341001	0.00710112	-0.877922	3.45e-05	0.000830378	-0.293752	0.239852	0.557839	0.289968	0.230985	0.440243
PCDHB5	protein_coding	ENSG00000113209	0.296637	-0.145383	0.693561	0.757888	-1.31116	0.000334601	0.00701416	-1.21556	0.00127936	0.0156394	-0.703317	0.0226827	0.140942	-1.00669	0.00197548	0.0136201
ARSB	protein_coding	ENSG00000113273	5.94978	0.0379829	0.686933	0.751949	-0.571341	2.06e-09	1.86e-07	-0.983842	4.73e-24	2.49e-21	-0.562858	2e-09	1.75e-07	-1.06044	1.88e-28	1.06e-25
CCNG1	protein_coding	ENSG00000113328	8.00799	-0.919288	2.86e-17	2.23e-16	0.477176	1.14e-05	0.000422702	0.691253	2.19e-10	2.25e-08	0.610884	1.18e-08	8.72e-07	0.599161	2.27e-08	8.67e-07
ARRDC3	protein_coding	ENSG00000113369	5.63493	-0.068309	0.699601	0.763166	-0.967773	7.6e-08	5.15e-06	-0.586098	0.00104893	0.0135982	0.0894854	0.611433	0.859607	-0.397437	0.0244873	0.092415
NPR3	protein_coding	ENSG00000113389	5.59293	-0.0258982	0.882404	0.916992	-0.619854	0.000356621	0.00733913	-0.480747	0.00560475	0.0477069	-0.801023	3.61e-06	0.000145883	-0.123915	0.471399	0.688068
TFDP2	protein_coding	ENSG00000114126	5.28596	-2.41219	8.47e-99	9.97e-97	0.631553	3.63e-07	2.12e-05	0.61918	9.23e-07	3.97e-05	0.243385	0.0117208	0.0903106	0.163069	0.0937835	0.241925
SLC4A3	protein_coding	ENSG00000114923	1.27884	-1.69985	1.42e-06	4.58e-06	1.13069	0.00309253	0.0381162	1.37952	0.000256035	0.00449773	0.125406	0.684856	0.904648	0.379867	0.189517	0.387591
EPB41L5	protein_coding	ENSG00000115109	6.52556	0.471725	1.35e-06	4.36e-06	-0.555958	1.54e-08	1.18e-06	-0.283412	0.00385961	0.0364111	-0.305724	0.00183538	0.0242319	-0.0879633	0.371139	0.595787
ITGA4	protein_coding	ENSG00000115232	5.89967	2.7353	4.08e-144	1.24e-141	-0.357153	0.000332301	0.00697523	-0.829436	2.21e-16	5.37e-14	0.285059	0.0108837	0.0855718	0.201711	0.0751517	0.207768
TACR1	protein_coding	ENSG00000115353	0.287016	2.76908	8.89e-17	6.69e-16	-1.12971	9.21e-05	0.00249533	-2.37448	2.49e-12	3.27e-10	1.03792	0.00912819	0.0758217	-0.521072	0.335515	0.55951
EFEMP1	protein_coding	ENSG00000115380	9.02866	-0.323332	0.00234229	0.00476191	-0.412949	0.000106489	0.00279317	-0.498036	3.07e-06	0.000109309	-0.378167	0.000369305	0.00686525	-0.674443	2.51e-10	1.57e-08
STAT1	protein_coding	ENSG00000115415	7.82385	-0.698271	4.27e-11	2.11e-10	-0.529303	6.93e-07	3.72e-05	-0.335699	0.0016302	0.0188959	-0.542819	2.57e-07	1.38e-05	-0.462045	1.15e-05	0.000196416
IL1RL1	protein_coding	ENSG00000115602	1.06068	6.15038	5.96e-45	1.65e-43	-0.767994	0.00288739	0.0362395	-1.19582	8.73e-06	0.000262063	-0.292234	1	1	-0.515451	0.73241	0.882413
ODC1	protein_coding	ENSG00000115758	8.76451	4.31186	3.95e-208	3.66e-205	-0.567625	3.64e-06	0.000160468	-1.05407	1.5e-17	3.95e-15	-0.622978	1.22e-06	5.47e-05	-0.363438	0.0045684	0.0259892
RGS2	protein_coding	ENSG00000116741	4.34559	-1.71976	1.1e-16	8.24e-16	-1.15121	1.84e-07	1.15e-05	-0.871573	6.94e-05	0.00150388	-0.903811	5.74e-06	0.000215536	-0.928197	3.32e-06	6.66e-05
OLFML3	protein_coding	ENSG00000116774	6.67222	-0.535127	2.07e-08	8.17e-08	-0.309164	0.00142574	0.0216526	-0.485589	6.85e-07	3.1e-05	-0.470035	6.84e-07	3.24e-05	-0.680681	9.35e-13	8.42e-11
NID1	protein_coding	ENSG00000116962	7.49524	-0.0657413	0.601852	0.674745	-0.866962	9.49e-12	1.16e-09	-1.1733	6.01e-20	1.93e-17	-1.17538	3.37e-20	1.47e-17	-1.46788	4.41e-30	3.31e-27
SIPA1L2	protein_coding	ENSG00000116991	6.86361	-4.19773	1.44e-122	2.88e-120	-1.09712	7.89e-10	7.49e-08	-1.20501	3.3e-11	3.67e-09	-0.68336	1.2e-05	0.000401348	-1.99031	6.75e-35	7.09e-32
NRP2	protein_coding	ENSG00000118257	7.7108	-0.470908	1.02e-05	2.93e-05	-0.436926	4.68e-05	0.00145802	-0.732725	1.22e-11	1.47e-09	-0.604885	1.4e-08	1.02e-06	-0.827956	1.08e-14	1.39e-12
TNFAIP3	protein_coding	ENSG00000118503	5.44252	4.16266	3.75e-195	2.96e-192	-0.542207	2.21e-06	0.0001033	-0.653526	1.44e-08	9.94e-07	-0.260212	0.114095	0.374317	-0.0909641	0.583777	0.778436
ELL2	protein_coding	ENSG00000118985	8.44297	0.628241	1.42e-10	6.73e-10	-0.398324	4.63e-05	0.00144667	-0.608238	5.72e-10	5.5e-08	-0.484226	7.95e-07	3.74e-05	-0.777259	3.3e-15	4.52e-13
KLF9	protein_coding	ENSG00000119138	3.69155	0.681788	2.87e-05	7.82e-05	-0.804007	1.16e-06	5.9e-05	-1.03017	1.2e-09	1.05e-07	0.178526	0.277335	0.600702	-0.781618	5.47e-06	0.000104348
GLE1	protein_coding	ENSG00000119392	5.01366	-0.500984	1.32e-05	3.75e-05	0.354643	0.00245938	0.032094	0.615654	1.39e-07	7.62e-06	0.32335	0.00302845	0.0347204	0.4946	5.67e-06	0.000107673
TTLL5	protein_coding	ENSG00000119685	4.3108	-1.1293	1.37e-19	1.23e-18	0.520136	7.33e-05	0.00207739	0.479043	0.000362802	0.00585984	0.391372	0.000382388	0.00704202	0.237911	0.0334681	0.115801
TEK	protein_coding	ENSG00000120156	8.01786	-0.752684	3.34e-14	2.09e-13	-0.621063	5.28e-10	5.11e-08	-0.586887	4.62e-09	3.57e-07	-0.552706	2.13e-08	1.51e-06	-0.745004	5.42e-14	6.42e-12
RCL1	protein_coding	ENSG00000120158	3.23895	1.73486	8.55e-20	7.73e-19	-0.886409	1.5e-06	7.54e-05	-0.801367	1.59e-05	0.000435974	-0.579882	0.00458798	0.0472094	-0.779536	0.000212646	0.0022543
KBTBD7	protein_coding	ENSG00000120696	3.27676	-0.157467	0.313035	0.388466	-1.46575	3.71e-17	9.25e-15	-0.626831	0.000138846	0.00271897	-0.790432	2.94e-07	1.56e-05	-0.0708289	0.651747	0.82583
EGR1	protein_coding	ENSG00000120738	4.57895	-1.22962	3.54e-25	4.34e-24	-0.927366	5.19e-12	6.44e-10	-1.96186	4e-38	7.01e-35	0.0384588	0.727329	0.922934	-0.370594	0.000918389	0.00735328
RDH10	protein_coding	ENSG00000121039	7.30344	-0.0172228	0.917543	0.945616	-1.46773	3.91e-18	1.12e-15	-1.02111	1.04e-09	9.27e-08	-1.19774	8.73e-13	1.45e-10	-1.13127	1.39e-11	1.08e-09
RBBP6	protein_coding	ENSG00000122257	6.01539	-1.16659	2.43e-23	2.71e-22	0.371991	0.00182338	0.026036	0.592149	6.71e-07	3.07e-05	0.0832133	0.459399	0.763526	0.276889	0.0139031	0.06088
IL13RA2	protein_coding	ENSG00000123496	4.25713	7.53373	6.64e-280	1.49e-276	-0.60301	2.29e-07	1.39e-05	-1.16191	3e-22	1.24e-19	1.84442	1.86e-06	8.04e-05	1.48414	0.000647263	0.00555441
LPGAT1	protein_coding	ENSG00000123684	6.74819	0.60833	8.12e-11	3.93e-10	-0.360552	0.000117049	0.00301903	-0.415777	9.6e-06	0.000284406	-0.193099	0.0399999	0.201612	-0.265079	0.00500244	0.0277887
EREG	protein_coding	ENSG00000124882	5.88538	5.15995	2.03e-102	2.62e-100	-1.15601	5.09e-09	4.2e-07	-0.671915	0.000608845	0.00897833	0.567144	0.0120291	0.0920964	0.201498	0.401352	0.625313
2020-09-06	protein_coding	ENSG00000125354	4.76617	-0.0613882	0.643972	0.713042	-0.452777	0.000746745	0.013197	-0.433406	0.00138132	0.0165843	-0.437274	0.000815368	0.0130096	-0.260922	0.0463627	0.14629
PTGER2	protein_coding	ENSG00000125384	5.68806	-1.07364	1.75e-19	1.56e-18	-0.771949	3.99e-10	3.95e-08	-1.11475	8.18e-19	2.43e-16	-0.673621	7.88e-09	6.09e-07	-1.30651	5.1e-28	2.44e-25
GPCPD1	protein_coding	ENSG00000125772	4.95311	0.803727	3.21e-06	9.89e-06	-0.815756	2.53e-06	0.000114382	-0.617123	0.000362219	0.00585644	-0.592158	0.000703995	0.0116207	-1.02124	9.14e-09	3.87e-07
FLRT3	protein_coding	ENSG00000125848	3.42865	-0.100402	0.51655	0.593938	-0.956932	5.02e-09	4.19e-07	-0.792371	1.46e-06	5.98e-05	-0.905199	4.56e-09	3.8e-07	0.00505374	0.980011	1
CANX	protein_coding	ENSG00000127022	9.75691	0.505899	6.27e-07	2.11e-06	-0.405368	6.48e-05	0.00186528	-0.383074	0.000160404	0.00307243	-0.258025	0.0109436	0.0857131	-0.146775	0.147737	0.328295
TUBA4A	protein_coding	ENSG00000127824	2.58379	-0.183399	0.438883	0.51836	1.15138	4.06e-07	2.32e-05	1.09287	1.88e-06	7.34e-05	0.484501	0.0276293	0.159833	0.598777	0.00667333	0.0348454
FGL2	protein_coding	ENSG00000127951	6.62934	0.413436	0.000832787	0.00182461	-1.12904	2.71e-19	8.91e-17	-0.862725	5.4e-12	6.86e-10	-1.04128	1.11e-16	2.93e-14	-1.47079	8.56e-31	6.75e-28
SGCE	protein_coding	ENSG00000127990	5.8737	-0.0647955	0.545084	0.621174	-0.638496	4.36e-09	3.7e-07	-0.489114	7.02e-06	0.000218057	-0.376702	0.000390048	0.00715799	-0.410604	0.00012002	0.00141828
SPECC1	protein_coding	ENSG00000128487	6.04741	-0.415309	0.000159455	0.000391595	0.595303	6.61e-08	4.59e-06	0.412278	0.000203218	0.00372311	0.138746	0.198367	0.507835	-0.00649852	0.953772	1
FOXP2	protein_coding	ENSG00000128573	2.43761	-2.29215	3.96e-19	3.44e-18	0.982826	0.000547856	0.0102692	1.12519	0.000106454	0.00216535	0.0421106	0.865628	0.983975	0.413193	0.0454035	0.144099
DNAJB9	protein_coding	ENSG00000128590	4.90792	0.406072	0.000516165	0.00116925	-0.84917	1.48e-12	1.98e-10	-0.637844	1.01e-07	5.69e-06	-0.119925	0.309593	0.633081	0.00371819	0.978035	1
TWSG1	protein_coding	ENSG00000128791	9.18947	-0.253894	0.0325566	0.0526868	-0.548439	4.24e-06	0.000181445	-0.557694	2.94e-06	0.00010571	-0.43551	0.000248246	0.00495664	-0.798651	2.3e-11	1.68e-09
PUDP	protein_coding	ENSG00000130021	5.1002	-0.0259643	0.814435	0.861083	0.424479	6.48e-05	0.00186528	0.435654	4.72e-05	0.00107226	0.456369	8.25e-06	0.000289649	0.612725	2.19e-09	1.09e-07
STARD8	protein_coding	ENSG00000130052	2.7072	3.29471	8.37e-62	4e-60	-0.538656	0.000853965	0.0146644	-1.06557	3.03e-10	3.02e-08	0.114595	0.725952	0.922377	-0.0504759	0.899756	0.976267
ZNF331	protein_coding	ENSG00000130844	4.48988	1.68035	5.97e-31	9.37e-30	-1.0762	2.99e-14	5.02e-12	-0.567654	5.13e-05	0.00115915	-0.249851	0.0984007	0.344555	-0.225781	0.138901	0.314106
GSE1	protein_coding	ENSG00000131149	5.32106	-0.255193	0.0128902	0.022783	-0.351828	0.000874696	0.014939	-0.565695	1.54e-07	8.26e-06	0.138031	0.166346	0.461344	-0.17038	0.0920073	0.238828
PTPRE	protein_coding	ENSG00000132334	0.227448	4.05913	6.29e-25	7.62e-24	-0.969928	0.000720814	0.012825	-1.36465	8.93e-06	0.000266475	0.0162217	1	1	-0.382063	0.83199	0.941731
H3F3B	protein_coding	ENSG00000132475	7.70829	0.689365	2.94e-13	1.72e-12	-0.446007	2.27e-06	0.000104763	-0.269578	0.00423582	0.0389804	-0.5133	6.29e-08	4.04e-06	-0.196257	0.0380566	0.126967
MATN2	protein_coding	ENSG00000132561	5.54937	-0.428486	0.00149776	0.00315145	-0.83931	1.32e-09	1.22e-07	-0.694355	5.37e-07	2.51e-05	-0.994245	2.34e-13	4.25e-11	-0.813682	1.92e-09	9.76e-08
SYT11	protein_coding	ENSG00000132718	6.39253	-0.68534	1.43e-12	7.91e-12	-0.503313	3.85e-07	2.22e-05	-0.792201	3.6e-15	7.46e-13	-0.366912	0.000119383	0.00273142	-0.716105	1.04e-13	1.17e-11
TRPC4	protein_coding	ENSG00000133107	3.24073	3.12147	1.14e-58	4.98e-57	-0.556957	0.000701396	0.0125789	-0.542459	0.00106633	0.0137445	-0.485557	0.0421715	0.207553	-1.25562	2.18e-06	4.66e-05
MORC4	protein_coding	ENSG00000133131	6.33321	0.779695	9.18e-17	6.89e-16	-0.37888	5.03e-05	0.00154595	-0.390933	3.15e-05	0.000763209	0.024978	0.793603	0.95174	-0.00403256	0.9674	1
TMTC1	protein_coding	ENSG00000133687	7.78308	-0.560902	3.97e-09	1.68e-08	-0.536001	2.56e-08	1.88e-06	-0.323865	0.000752507	0.0105821	-0.50078	1.32e-07	7.75e-06	-0.412101	1.4e-05	0.000232894
E2F5	protein_coding	ENSG00000133740	2.17746	1.25567	1.29e-11	6.68e-11	-0.522092	0.00343146	0.040836	-1.21677	2.9e-10	2.91e-08	-0.510064	0.0139103	0.101741	-1.22352	8.53e-08	2.78e-06
ADAMTS8	protein_coding	ENSG00000134917	6.70272	-1.10695	6.41e-25	7.76e-24	-1.00604	5.22e-20	2.11e-17	-1.35725	5.41e-34	5.33e-31	-1.49217	2.2e-43	1.16e-39	-1.86065	1.25e-64	1.96e-60
DOCK10	protein_coding	ENSG00000135905	5.96392	2.23787	1.02e-61	4.85e-60	-0.498539	0.000107449	0.00281365	-0.389463	0.00248288	0.0262333	0.384106	0.00445042	0.046145	0.509649	0.000160835	0.001817
LMO7	protein_coding	ENSG00000136153	8.4634	-0.359961	0.0202225	0.0342599	0.493276	0.00148283	0.0223902	0.819179	1.45e-07	7.87e-06	0.189457	0.220253	0.535481	0.729951	2.54e-06	5.28e-05
EDNRB	protein_coding	ENSG00000136160	3.39057	-0.247681	0.189606	0.251565	-0.99331	4.92e-07	2.76e-05	-0.684315	0.000511214	0.00776922	-0.455178	0.0136522	0.100661	-0.967836	3.25e-07	8.91e-06
ZFHX2	protein_coding	ENSG00000136367	1.18601	0.256949	0.301397	0.375859	-1.32664	1.89e-06	9.01e-05	-0.793186	0.00322758	0.0319997	-1.14807	2.02e-05	0.000619111	-0.921665	0.000526812	0.00469455
UACA	protein_coding	ENSG00000137831	8.96389	-0.228095	0.0434101	0.0681794	0.961784	2.55e-17	6.48e-15	0.821432	4.51e-13	6.53e-11	1.43821	2.57e-36	5.06e-33	0.876813	9.03e-15	1.18e-12
SEMA6D	protein_coding	ENSG00000137872	4.99939	3.11923	5.02e-109	7.54e-107	-0.662113	1.03e-07	6.81e-06	-0.652192	1.8e-07	9.47e-06	-0.0927947	0.553348	0.822457	-0.434532	0.00572399	0.0308594
CILP	protein_coding	ENSG00000138615	0.795877	-0.523404	0.124415	0.174413	-1.16176	0.00233832	0.0309758	-2.42642	4.73e-08	2.89e-06	-0.911221	0.00711552	0.0639172	-2.42789	3.37e-10	2.03e-08
FGF2	protein_coding	ENSG00000138685	9.08856	2.62124	1.14e-72	7.13e-71	0.750396	4.65e-08	3.27e-06	1.01205	2.16e-13	3.34e-11	0.503063	0.000286956	0.00559848	0.757426	5.07e-08	1.76e-06
SCARB2	protein_coding	ENSG00000138760	8.84581	0.811557	7.89e-18	6.34e-17	-0.410012	1.27e-05	0.000461362	-0.518358	3.64e-08	2.33e-06	-0.170337	0.070071	0.285648	-0.21565	0.0219532	0.085052
FBN2	protein_coding	ENSG00000138829	10.6876	-0.655064	0.000809176	0.00177633	-1.04182	1.21e-07	7.9e-06	-0.604195	0.00199948	0.0221814	-1.27112	1.3e-10	1.48e-08	-0.839369	1.86e-05	0.000293663
AMIGO2	protein_coding	ENSG00000139211	5.67302	3.20617	2.57e-106	3.58e-104	-0.698961	9.95e-08	6.65e-06	-0.483395	0.000223743	0.00404018	-0.540754	0.000377925	0.00699249	-0.384141	0.0120844	0.0548672
POC1B	protein_coding	ENSG00000139323	4.00805	0.539133	2.38e-05	6.56e-05	-0.552855	1.98e-05	0.000671342	-0.453438	0.000489392	0.00747555	-0.105839	0.411775	0.727879	-0.286683	0.0291807	0.10488
LUM	protein_coding	ENSG00000139329	9.88569	-0.167741	0.184892	0.246273	-0.967449	3.66e-14	5.95e-12	-0.622372	9.72e-07	4.15e-05	-0.822704	1.03e-10	1.2e-08	-0.715501	1.82e-08	7.05e-07
SSTR1	protein_coding	ENSG00000139874	4.95028	4.441	8.59e-203	7.13e-200	-0.897931	8.83e-15	1.58e-12	-0.680424	3.99e-09	3.11e-07	0.266422	0.137645	0.416475	0.301326	0.0854252	0.226982
FBLN5	protein_coding	ENSG00000140092	9.10982	-0.31953	0.00314593	0.00623642	-0.314204	0.00374836	0.0436726	-0.404599	0.000194033	0.00359851	-0.564396	1.9e-07	1.06e-05	-0.520769	1.54e-06	3.45e-05
WARS	protein_coding	ENSG00000140105	7.67033	-0.673287	2.6e-06	8.11e-06	-0.762789	1.2e-07	7.88e-06	-1.1028	3.22e-14	5.58e-12	-1.04085	4.9e-13	8.59e-11	-1.3569	9.15e-21	2.45e-18
HMG20A	protein_coding	ENSG00000140382	4.98934	-0.327096	0.00180082	0.00373821	-0.949806	9.72e-18	2.74e-15	-0.8084	3.3e-13	4.91e-11	-0.983945	9.87e-21	4.72e-18	-0.940215	7.05e-19	1.44e-16
IGF1R	protein_coding	ENSG00000140443	6.59352	-0.505793	2.41e-06	7.55e-06	-0.448585	3.86e-05	0.001233	-0.35562	0.001147	0.0145276	-0.235233	0.0267106	0.15595	-0.299459	0.00488805	0.0273536
ABHD2	protein_coding	ENSG00000140526	7.79836	1.47958	4.51e-41	1.1e-39	0.390548	0.000280502	0.00614144	0.311722	0.00375943	0.0356188	0.668121	9.1e-10	8.69e-08	0.437757	6.17e-05	0.000813736
ZFHX3	protein_coding	ENSG00000140836	5.28011	-0.866432	1.19e-13	7.18e-13	0.567524	1.84e-06	8.86e-05	0.356397	0.00323634	0.0320463	0.255134	0.0211713	0.134466	0.334975	0.0025465	0.0165181
CMTM3	protein_coding	ENSG00000140931	4.95075	0.195899	0.0931968	0.135132	-0.395041	0.000818008	0.0141549	-0.525568	1.12e-05	0.000322572	-0.495707	2.32e-05	0.000694316	-0.663137	2.39e-08	9.08e-07
CDH13	protein_coding	ENSG00000140945	5.71501	-0.0869315	0.389075	0.467483	0.349266	0.000506669	0.00964628	0.450343	7.83e-06	0.000239537	0.494502	3.53e-07	1.83e-05	0.529342	5.51e-08	1.9e-06
SLC39A6	protein_coding	ENSG00000141424	8.18895	0.286618	0.001186	0.00253679	-0.358034	5.36e-05	0.00161879	-0.355128	6.3e-05	0.00137533	-0.189182	0.0323477	0.176388	-0.204599	0.0208143	0.0818244
GALNT1	protein_coding	ENSG00000141429	6.51483	0.587709	3.16e-10	1.46e-09	-0.324846	0.000505023	0.00963824	-0.937479	6.24e-23	2.73e-20	-0.351665	0.000184465	0.00392431	-1.04967	1.1e-27	4.82e-25
NT5C3B	protein_coding	ENSG00000141698	4.86481	-0.327727	0.00567177	0.0107335	0.346033	0.0037793	0.0438711	0.396898	0.00094692	0.0125439	0.200662	0.0770931	0.300414	0.435489	0.000118474	0.00140635
PGD	protein_coding	ENSG00000142657	7.51864	-0.244935	0.0114914	0.0204967	-0.287432	0.00321545	0.0391416	-0.460612	2.65e-06	9.73e-05	-0.0796204	0.408884	0.724748	-0.193002	0.0457631	0.144978
LMO4	protein_coding	ENSG00000143013	6.2538	1.42766	4.73e-26	6.03e-25	-1.10037	2.7e-16	5.76e-14	-1.08696	7.14e-16	1.56e-13	-0.661484	1.15e-06	5.18e-05	-0.573813	2.51e-05	0.000379327
ITGA10	protein_coding	ENSG00000143127	2.4032	-0.39574	0.0872249	0.12747	1.65879	1.64e-15	3.23e-13	0.79274	0.000784738	0.0109378	1.95993	3.55e-29	5.08e-26	1.14083	1.03e-09	5.66e-08
ABL2	protein_coding	ENSG00000143322	7.4741	1.85724	3.54e-45	9.89e-44	0.386324	0.00234843	0.0310836	0.37697	0.0030108	0.0303661	0.438813	0.000711101	0.0116769	1.18969	5.85e-20	1.42e-17
ACKR3	protein_coding	ENSG00000144476	0.654028	2.56689	1.32e-13	7.93e-13	-1.19336	0.000193142	0.00450397	-1.23883	0.000130652	0.00258744	-0.684194	0.126199	0.396295	-2.42361	2.92e-05	0.00043131
EAF1	protein_coding	ENSG00000144597	5.49016	1.7698	5.38e-63	2.69e-61	-0.861576	7.14e-17	1.71e-14	-0.291691	0.00435277	0.039663	-0.522026	3.26e-06	0.000133654	0.0500247	0.654345	0.82746
LIMD1	protein_coding	ENSG00000144791	6.7258	-0.0250981	0.825418	0.870128	-0.388847	0.000567675	0.0105529	-0.457271	5.44e-05	0.00122138	0.102731	0.355899	0.678568	0.00934556	0.93499	0.994585
SCD5	protein_coding	ENSG00000145284	3.58249	-1.08401	1.8e-13	1.07e-12	-1.89473	2.3e-26	2.41e-23	-1.33795	6.75e-15	1.31e-12	-1.3411	4.33e-20	1.85e-17	-1.69005	3.34e-29	2.19e-26
LHFPL2	protein_coding	ENSG00000145685	5.84942	-0.263628	0.0372482	0.0595397	-1.5278	6.5e-31	1.14e-27	-0.477554	0.000204455	0.00373901	-1.18581	2.31e-20	1.04e-17	-0.381754	0.0024677	0.016149
CRHBP	protein_coding	ENSG00000145708	-1.18816	3.64764	3.86e-10	1.77e-09	-1.88772	0.000167834	0.00403314	-2.08797	5.58e-05	0.00124336	0.0121533	1	1	0.587698	0.63423	0.812917
ADAMTS19	protein_coding	ENSG00000145808	5.9707	-0.530808	0.0175352	0.0301478	-1.8963	3.3e-16	6.76e-14	-1.17284	2.61e-07	1.31e-05	-1.20892	8.72e-08	5.36e-06	-1.07609	1.79e-06	3.89e-05
SCUBE3	protein_coding	ENSG00000146197	5.64389	0.285552	0.0394037	0.0625602	-1.30346	4.73e-20	1.96e-17	-1.02345	4.7e-13	6.73e-11	-1.5463	3.14e-27	3.09e-24	-1.42953	1.61e-23	5.4e-21
PHIP	protein_coding	ENSG00000146247	5.65654	-1.19151	2.41e-22	2.56e-21	0.424434	0.000709825	0.0127014	0.665122	1.06e-07	5.93e-06	0.195003	0.0946296	0.33788	0.253777	0.0299525	0.106875
EGFR	protein_coding	ENSG00000146648	8.97989	1.12114	1.38e-30	2.12e-29	0.317572	0.000963541	0.0160563	0.315377	0.00104985	0.0135989	0.459441	2.03e-06	8.72e-05	0.265632	0.00606228	0.0323513
TLK2	protein_coding	ENSG00000146872	5.81737	0.495597	4.78e-07	1.63e-06	-0.310893	0.00164795	0.0240763	-0.37432	0.000170492	0.00323812	-0.303112	0.00226912	0.0283667	-0.158618	0.110957	0.270761
ATP6V1B2	protein_coding	ENSG00000147416	6.53623	0.941915	1.22e-13	7.35e-13	-0.43213	0.000621425	0.0113381	-0.364823	0.00391644	0.0367931	-0.270388	0.033876	0.181826	-0.0900588	0.480819	0.695379
CEP78	protein_coding	ENSG00000148019	4.21389	-0.505461	0.000619826	0.00138555	0.51346	0.000552008	0.0103145	0.622763	3.07e-05	0.000748042	0.238565	0.0874312	0.324241	0.129807	0.357868	0.583576
SHC3	protein_coding	ENSG00000148082	5.48779	0.71679	7.01e-12	3.7e-11	-0.90406	1.5e-17	3.95e-15	-0.560346	1.11e-07	6.13e-06	-0.563285	1.37e-07	8.01e-06	-0.352712	0.000968054	0.00767626
ALAD	protein_coding	ENSG00000148218	5.36683	-0.91795	1.18e-16	8.8e-16	0.364527	0.00141665	0.021556	0.335056	0.00362938	0.0346539	0.394751	0.000158808	0.00347218	0.313116	0.00292957	0.0184432
PTPRJ	protein_coding	ENSG00000149177	5.4109	1.09032	2.32e-19	2.05e-18	-0.66722	3.1e-08	2.24e-06	-0.850484	2.83e-12	3.68e-10	-1.03403	2.17e-16	5.35e-14	-0.734942	4.71e-09	2.19e-07
AASDHPPT	protein_coding	ENSG00000149313	5.28693	-0.00529413	0.966471	0.988032	-0.662003	5.89e-09	4.81e-07	-0.700934	9.2e-10	8.43e-08	-0.728268	6.88e-11	8.28e-09	-0.792073	1.91e-12	1.63e-10
HYOU1	protein_coding	ENSG00000149428	6.9139	-0.0828744	0.568168	0.643156	-0.501103	0.000604298	0.0110898	-0.462392	0.00157353	0.0183606	-0.614579	2.43e-05	0.0007201	-0.410578	0.00474281	0.0267785
MKX	protein_coding	ENSG00000150051	3.63605	0.374669	0.0942006	0.136374	-1.66826	2.11e-12	2.74e-10	-0.836465	0.00026272	0.00458219	0.0086198	0.985465	1	0.685946	0.00193366	0.0134224
ADGRL3	protein_coding	ENSG00000150471	0.373725	-1.25386	0.000602267	0.00134879	-1.35334	0.00312588	0.0384371	-2.64145	4.72e-06	0.000155763	-1.27594	0.000248398	0.00495664	-1.95983	1.83e-07	5.43e-06
RGS18	protein_coding	ENSG00000150681	0.575228	-0.716119	0.0204792	0.0346314	-3.09782	6.82e-11	7.52e-09	-2.16121	4.57e-07	2.19e-05	-1.06316	0.000445715	0.00794359	-1.38986	1.36e-05	0.000226131
BTBD11	protein_coding	ENSG00000151136	2.37468	3.20422	5.47e-42	1.37e-40	-0.581027	0.00307139	0.0378956	-1.0179	6.73e-07	3.07e-05	-0.0713289	0.898199	0.993746	0.424447	0.138133	0.312953
MAGI1	protein_coding	ENSG00000151276	5.0166	-0.312444	0.00367934	0.0072051	0.496863	3.97e-06	0.00017283	0.533912	8.31e-07	3.67e-05	0.0796374	0.441617	0.750614	0.179203	0.0834344	0.223476
NEK7	protein_coding	ENSG00000151414	8.11442	1.34595	2.74e-22	2.89e-21	0.506839	0.000196702	0.00456673	0.77153	1.59e-08	1.09e-06	0.0163251	0.906193	0.996711	0.574421	2.81e-05	0.000418461
EDNRA	protein_coding	ENSG00000151617	6.2771	-0.373709	0.000503128	0.00114087	-0.55027	4.81e-07	2.71e-05	-1.06431	1.33e-21	5e-19	-0.859593	1.52e-15	3.58e-13	-0.77383	7.05e-13	6.58e-11
BICD1	protein_coding	ENSG00000151746	4.72703	0.448442	0.000163826	0.000401682	-0.622166	2.87e-07	1.71e-05	-0.425435	0.000442645	0.00685448	-0.0327323	0.793076	0.951667	-0.119353	0.32643	0.550101
GJA1	protein_coding	ENSG00000152661	9.47382	1.42507	8.66e-24	9.87e-23	-1.00059	1.02e-12	1.38e-10	-0.686363	8.89e-07	3.87e-05	-0.000706054	0.996156	1	-0.07008	0.615045	0.799979
LMNTD1	protein_coding	ENSG00000152936	0.013465	5.50565	9.19e-33	1.55e-31	-1.4147	7.01e-07	3.73e-05	-1.30061	8.37e-06	0.000253289	0.31975	1	1	1.1432	0.27931	0.496005
STK32B	protein_coding	ENSG00000152953	4.23832	0.927271	6.54e-05	0.000169702	-0.766253	0.000972177	0.0160981	-0.929587	7.31e-05	0.00156582	-0.854784	0.000311632	0.00597636	-0.412108	0.0785466	0.214456
SREK1IP1	protein_coding	ENSG00000153006	5.30083	0.785894	2.21e-11	1.12e-10	0.393427	0.000594245	0.0109563	0.418314	0.000279606	0.00479621	0.492256	2.49e-05	0.000734449	0.606764	2.16e-07	6.26e-06
CACNA2D1	protein_coding	ENSG00000153956	6.67333	0.374057	0.0041468	0.00805547	-0.510819	9.65e-05	0.00259486	-0.435645	0.000885588	0.0119286	-0.416137	0.00147377	0.020592	-0.403542	0.00207339	0.0141916
ABI3BP	protein_coding	ENSG00000154175	4.23107	0.0583463	0.73118	0.790286	-1.5578	1.62e-18	4.72e-16	-1.9188	7.16e-26	4.03e-23	-1.36384	3.73e-15	8.4e-13	-1.83268	1.18e-24	4.14e-22
FAM167A	protein_coding	ENSG00000154319	5.94429	4.84742	1.27e-184	9.08e-182	-0.590831	1.17e-05	0.000431389	-0.464856	0.000563073	0.00842152	-0.234037	0.196993	0.50519	-0.597947	0.00152053	0.0110766
NCAM2	protein_coding	ENSG00000154654	3.4728	-0.284921	0.155792	0.212283	-0.967557	4.33e-06	0.000184691	-0.635575	0.00242623	0.0257556	-0.781134	0.000101269	0.00240422	-0.874569	1.7e-05	0.000271568
JAM2	protein_coding	ENSG00000154721	3.08904	-0.154803	0.375546	0.453613	-0.572561	0.00170064	0.0246631	-0.55684	0.00267039	0.027604	-0.275598	0.107286	0.361412	-0.195908	0.255066	0.46765
ADAMTS1	protein_coding	ENSG00000154734	8.59481	-0.41895	0.0187627	0.0320415	-0.792336	9.88e-06	0.00038004	-0.52046	0.00357922	0.0343726	-1.65062	1.58e-19	5.78e-17	-1.69196	2.2e-20	5.49e-18
ADAMTS5	protein_coding	ENSG00000154736	5.13147	-2.62712	1.02e-65	5.4e-64	-1.63592	2.22e-21	1.1e-18	-0.665714	4.19e-05	0.000980298	-1.82813	1.68e-36	4.42e-33	-1.32459	1.81e-20	4.67e-18
C16orf87	protein_coding	ENSG00000155330	4.69268	0.723033	1.98e-06	6.26e-06	-0.687211	6.89e-06	0.000281302	-0.509959	0.000840937	0.0115374	-0.0980312	0.525997	0.807083	-0.117235	0.449734	0.668352
MMP16	protein_coding	ENSG00000156103	5.0786	1.98738	2.93e-42	7.44e-41	0.422134	0.00172471	0.0249205	0.489354	0.00028869	0.00490814	0.566413	0.000122084	0.00278328	0.538321	0.000300948	0.00294667
CUL4B	protein_coding	ENSG00000158290	7.04704	0.333228	0.00049527	0.00112418	-0.377161	8.75e-05	0.00239443	-0.280959	0.00352807	0.0340241	0.238492	0.0122483	0.0933214	0.507629	9.87e-08	3.14e-06
CACHD1	protein_coding	ENSG00000158966	4.48598	1.58216	1.87e-24	2.2e-23	-0.890854	3.84e-09	3.35e-07	-0.927187	1.17e-09	1.03e-07	-0.438001	0.00609574	0.0566024	-0.122319	0.447301	0.666281
STC1	protein_coding	ENSG00000159167	9.8388	6.54634	0	0	-0.516579	7.23e-05	0.00205468	-0.655079	5.08e-07	2.4e-05	0.586151	2.4e-05	0.000715943	-0.0922836	0.520464	0.728058
HK2	protein_coding	ENSG00000159399	6.92359	3.02611	7.18e-138	1.92e-135	-0.614271	4.43e-08	3.16e-06	-0.417173	0.000197948	0.00364965	-0.783002	1.76e-10	1.97e-08	0.210116	0.0785617	0.214456
C1R	protein_coding	ENSG00000159403	7.42265	-0.60882	1.02e-07	3.75e-07	-0.472627	3.97e-05	0.00126318	-1.49508	1.09e-36	1.43e-33	-0.759745	3.08e-11	3.91e-09	-1.66172	1.14e-45	2.1e-42
ALDH4A1	protein_coding	ENSG00000159423	2.00228	-0.960487	1.32e-06	4.28e-06	-0.846718	0.000281372	0.00615194	-1.06358	1.72e-05	0.000462542	-1.3804	2.49e-12	3.81e-10	-0.959026	7.34e-07	1.82e-05
FAM131B	protein_coding	ENSG00000159784	2.80018	1.2456	1.36e-11	6.99e-11	-0.685949	0.000155065	0.00380753	-0.834529	6.55e-06	0.000206155	-0.417666	0.0337809	0.18161	-0.611281	0.00273452	0.0174663
CCDC117	protein_coding	ENSG00000159873	4.55118	-0.792996	1.43e-12	7.9e-12	-0.356968	0.00312037	0.0383993	-0.400857	0.00104614	0.0135844	-0.303495	0.00465046	0.0475113	-0.487821	7.37e-06	0.000134553
ZER1	protein_coding	ENSG00000160445	4.80629	-1.41489	2.15e-28	3.05e-27	0.456055	0.000607443	0.0111151	0.492494	0.000251641	0.00444014	0.0892376	0.450537	0.757332	-0.0477118	0.691792	0.853693
PCSK7	protein_coding	ENSG00000160613	5.72041	0.538082	1.07e-07	3.9e-07	0.397722	6.44e-05	0.00186335	0.334048	0.000849054	0.0116084	0.218586	0.0302076	0.168953	0.205013	0.0436381	0.140161
SRSF2	protein_coding	ENSG00000161547	6.95232	1.43311	1.43e-51	4.99e-50	-0.358641	0.000112866	0.00293118	-0.574471	7.9e-10	7.37e-08	-0.0513778	0.592689	0.847836	0.0461742	0.627975	0.80877
GRASP	protein_coding	ENSG00000161835	3.10838	1.74737	1.28e-25	1.6e-24	-0.683065	1.59e-05	0.000558141	-1.20427	3.38e-13	4.98e-11	-0.0906532	0.619143	0.864672	-0.499368	0.00815976	0.0405902
PLPP3	protein_coding	ENSG00000162407	8.12623	-1.02262	3.69e-23	4.1e-22	-0.699173	1.62e-11	1.94e-09	-0.634631	1e-09	9.04e-08	-0.169709	0.0952034	0.338702	-0.815932	1.77e-15	2.56e-13
USP1	protein_coding	ENSG00000162607	4.82695	0.057936	0.670607	0.737663	-0.458422	0.000848408	0.0146008	-0.397058	0.00389055	0.0366063	-0.105971	0.431312	0.741784	-0.449456	0.000913253	0.00733426
VCAM1	protein_coding	ENSG00000162692	5.35279	-4.00082	1.66e-95	1.82e-93	-1.05382	2.68e-07	1.61e-05	-1.45579	1.36e-11	1.62e-09	-1.41413	4.17e-17	1.22e-14	-2.68154	3.04e-52	9.59e-49
B3GALNT2	protein_coding	ENSG00000162885	5.68565	2.37332	2.4e-80	1.74e-78	-0.615491	2.24e-07	1.37e-05	-1.05983	1.54e-18	4.51e-16	-0.267926	0.0387613	0.198452	-0.00490881	0.977254	1
IL24	protein_coding	ENSG00000162892	1.86991	11.2694	1.74e-66	9.35e-65	-1.41293	1.52e-08	1.18e-06	-0.925391	0.000155796	0.00299874	0	1	1	0	1	1
FRZB	protein_coding	ENSG00000162998	0.771679	-0.107735	0.725368	0.785404	-1.10264	0.000430893	0.00851204	-1.36649	4.01e-05	0.000945715	-1.01402	0.000483686	0.00850035	-0.793914	0.00569099	0.0307354
ACTG2	protein_coding	ENSG00000163017	8.89166	1.56554	3.77e-33	6.48e-32	-0.745655	6.01e-09	4.86e-07	-0.7711	1.85e-09	1.53e-07	-1.27354	1.42e-22	8.61e-20	-0.338438	0.00831442	0.0412424
SPATA18	protein_coding	ENSG00000163071	4.92137	-0.60997	4.15e-07	1.43e-06	0.57747	2.26e-06	0.000104763	0.363057	0.00353361	0.034028	0.716199	1.92e-10	2.1e-08	0.370274	0.00117218	0.00895258
C1QTNF7	protein_coding	ENSG00000163145	0.855166	-2.04415	8.95e-11	4.32e-10	-1.55342	0.00125834	0.0197378	-2.99851	5.28e-07	2.48e-05	-1.23494	9.88e-06	0.000339196	-0.830046	0.00235845	0.0155494
DCAF16	protein_coding	ENSG00000163257	5.28513	-0.504934	1.67e-05	4.69e-05	0.406744	0.000602365	0.0110672	0.541724	5.06e-06	0.000163586	0.138299	0.222268	0.537891	0.121836	0.286336	0.504447
EOGT	protein_coding	ENSG00000163378	6.23667	0.077316	0.449667	0.529031	0.29234	0.00414498	0.0472121	0.601588	3.42e-09	2.74e-07	0.33088	0.000988812	0.0151043	0.480974	1.73e-06	3.8e-05
ADAMTS9	protein_coding	ENSG00000163638	3.22996	-2.5847	7.53e-43	1.95e-41	-0.826134	0.000591561	0.0109324	-1.04049	4.08e-05	0.000959833	-0.513642	0.00132526	0.0189405	-1.36178	4.56e-16	7.28e-14
SGMS2	protein_coding	ENSG00000164023	5.79828	1.1482	1.7e-14	1.09e-13	-0.572895	0.000110789	0.00289151	-1.2621	6.55e-17	1.61e-14	0.0406804	0.787272	0.949326	-0.509708	0.000756687	0.00630466
SPRY1	protein_coding	ENSG00000164056	3.99453	-1.89179	5.6e-33	9.54e-32	-1.14304	3.21e-09	2.82e-07	-0.574937	0.00219062	0.0238158	-0.199975	0.156508	0.446704	0.174228	0.211917	0.417296
PRSS12	protein_coding	ENSG00000164099	7.56033	-0.830605	4.04e-14	2.52e-13	-0.795308	8.69e-13	1.22e-10	-0.555534	5.57e-07	2.58e-05	-0.458763	2.52e-05	0.000739241	-0.380833	0.00046938	0.00425492
PRRC1	protein_coding	ENSG00000164244	7.2	0.634861	1.77e-12	9.76e-12	-0.325155	0.000296918	0.0064206	-0.403524	7.69e-06	0.000235764	-0.14967	0.0971767	0.342383	-0.217646	0.0161448	0.0678163
ERAP1	protein_coding	ENSG00000164307	5.87505	-0.158406	0.123782	0.173712	-0.34737	0.000879027	0.0149805	-1.5264	2.44e-44	7.69e-41	-0.353947	0.000545911	0.00938831	-1.63193	1.48e-52	5.85e-49
ALDH7A1	protein_coding	ENSG00000164904	5.59171	-0.459211	5.56e-05	0.000145861	-0.501344	1.92e-05	0.000655536	-0.495069	2.78e-05	0.00069459	-0.371053	0.000974404	0.0149131	-0.424757	0.000169071	0.00189346
CTHRC1	protein_coding	ENSG00000164932	7.72505	-0.261789	0.00771933	0.014225	-2.17552	7.91e-98	1.25e-93	-1.20558	4.13e-33	3.68e-30	-1.26207	1.18e-36	3.72e-33	-0.991468	1.71e-23	5.61e-21
MAMDC2	protein_coding	ENSG00000165072	4.5392	-0.913876	1.62e-06	5.18e-06	1.32609	2.78e-12	3.54e-10	2.18167	8.23e-31	6.18e-28	1.07708	7.02e-10	6.92e-08	1.77771	4.48e-24	1.54e-21
SVEP1	protein_coding	ENSG00000165124	10.3982	-0.739656	1.55e-10	7.33e-10	-0.57752	5.7e-07	3.14e-05	-0.361942	0.00168951	0.0194263	-0.634994	3.69e-08	2.44e-06	-0.431734	0.00017625	0.00195476
2020-03-08	protein_coding	ENSG00000165406	5.0488	-1.96149	3.38e-63	1.69e-61	0.474807	0.000167243	0.00402506	0.602274	1.87e-06	7.33e-05	0.2358	0.020265	0.130871	0.155236	0.129045	0.299771
GJB2	protein_coding	ENSG00000165474	0.807423	7.33112	2.38e-47	7.27e-46	-1.38504	2.79e-07	1.67e-05	-2.09118	7.33e-13	1.04e-10	2.77852	0.0035212	0.0384672	3.83312	2.48e-06	5.17e-05
ENOX2	protein_coding	ENSG00000165675	3.82546	-0.22666	0.124558	0.174575	0.48561	0.000857536	0.0146937	0.657555	7.09e-06	0.000218786	0.299691	0.0293254	0.165753	0.375041	0.00666724	0.0348252
CASP7	protein_coding	ENSG00000165806	4.3027	-0.10557	0.453441	0.532769	-0.422832	0.00318227	0.0388879	-0.6716	4.17e-06	0.000141988	0.0339586	0.807609	0.956942	-0.276396	0.04583	0.145073
TRUB1	protein_coding	ENSG00000165832	4.73695	-0.0787131	0.552923	0.628699	0.383787	0.00318183	0.0388879	0.59647	4.47e-06	0.00014904	-0.0498319	0.704574	0.914909	0.223023	0.0795357	0.216285
BTRC	protein_coding	ENSG00000166167	5.64445	0.215294	0.0429495	0.0675367	-0.912923	6.32e-17	1.53e-14	-0.306064	0.00452978	0.0408276	-0.658052	9.27e-10	8.81e-08	0.0204109	0.85225	0.951841
FRS2	protein_coding	ENSG00000166225	5.45234	-0.12801	0.250764	0.32037	-0.624093	4.5e-08	3.2e-06	-0.499359	1.21e-05	0.000342616	-0.599316	6.85e-08	4.35e-06	-0.360378	0.00115293	0.00882699
NETO1	protein_coding	ENSG00000166342	4.28087	1.88544	1.76e-14	1.13e-13	-0.940806	8.12e-05	0.00224867	-0.961414	5.96e-05	0.00130947	-1.05534	2.65e-05	0.000772363	-1.10292	1.32e-05	0.000220189
SERPINB7	protein_coding	ENSG00000166396	3.15035	1.38823	3.89e-07	1.34e-06	1.09174	1.78e-06	8.61e-05	2.81841	1.82e-38	3.58e-35	1.90023	5.93e-14	1.18e-11	3.8273	2.66e-58	2.1e-54
SLFN5	protein_coding	ENSG00000166750	8.29151	-0.367921	0.000795987	0.00174909	0.382572	0.00049342	0.0094282	0.502916	4.77e-06	0.000155998	-0.0239452	0.826978	0.965309	-0.117334	0.283209	0.50073
TAC3	protein_coding	ENSG00000166863	0.928434	-0.135785	0.563412	0.638717	-1.29296	2.32e-06	0.000106667	-1.71579	5.59e-09	4.16e-07	-1.37162	1.96e-08	1.4e-06	-1.59708	8.01e-10	4.48e-08
C2CD3	protein_coding	ENSG00000168014	5.09652	-0.606895	2.48e-06	7.75e-06	0.428589	0.00106151	0.0171751	0.476549	0.000288934	0.00490814	0.481583	8.8e-05	0.00213455	0.745319	1.22e-09	6.59e-08
MAP4K2	protein_coding	ENSG00000168067	2.54101	-1.60678	2.11e-15	1.45e-14	0.672303	0.00314086	0.0385912	0.643303	0.005889	0.0494061	0.347787	0.0319101	0.175496	0.139951	0.402708	0.626442
GNG4	protein_coding	ENSG00000168243	1.1077	5.62001	2.26e-40	5.33e-39	-1.24232	1.66e-05	0.000579263	-1.86379	1.1e-09	9.77e-08	0.0149748	1	1	-0.1686	1	1
MGAT2	protein_coding	ENSG00000168282	6.47147	0.801435	1.16e-16	8.63e-16	-0.365888	0.000144556	0.00358862	-0.284121	0.00321585	0.0319638	-0.0391789	0.689041	0.907136	-0.0090342	0.928783	0.990618
MN1	protein_coding	ENSG00000169184	3.96778	-0.72558	2.56e-06	7.99e-06	-0.499417	0.00221685	0.0299969	-1.32136	4.26e-14	7.22e-12	-0.567088	0.000162572	0.00353488	-0.548167	0.0002884	0.00285037
CSGALNACT2	protein_coding	ENSG00000169826	7.57792	2.5131	1.46e-142	4.17e-140	-0.592543	2.47e-10	2.58e-08	-0.740464	3.31e-15	7.14e-13	-0.227053	0.0200049	0.129726	-0.310737	0.00155911	0.0112866
TM4SF1	protein_coding	ENSG00000169908	9.81841	3.88814	2.2e-224	2.67e-221	-0.676945	4.78e-10	4.67e-08	-0.355675	0.00103061	0.0134269	0.278207	0.0116417	0.0898287	0.688336	4.58e-10	2.73e-08
SLC30A1	protein_coding	ENSG00000170385	6.46133	1.71018	1.18e-40	2.81e-39	-0.60778	1.14e-06	5.82e-05	-0.344706	0.0056389	0.0478169	-0.249132	0.0523524	0.239942	0.12319	0.334572	0.558293
SGCD	protein_coding	ENSG00000170624	6.64103	-0.799627	1.7e-14	1.09e-13	-0.855753	1.33e-15	2.66e-13	-0.306578	0.00382608	0.036138	-0.919317	8.76e-19	3.07e-16	-0.439558	2e-05	0.000314648
CYTL1	protein_coding	ENSG00000170891	3.51491	-0.232845	0.499496	0.577489	-1.32572	0.000191869	0.00448757	-1.29145	0.000291313	0.0049326	-1.13823	0.00107361	0.0161032	-1.31249	0.000178847	0.00197294
TANC2	protein_coding	ENSG00000170921	5.94162	-1.57826	1.33e-53	4.98e-52	0.645385	9.81e-10	9.2e-08	0.40903	0.000143321	0.00278583	0.142875	0.135865	0.413389	0.151437	0.114943	0.277069
PDGFD	protein_coding	ENSG00000170962	6.19705	-0.606526	1.61e-08	6.44e-08	-1.03119	1.7e-20	7.46e-18	-0.573077	2.02e-07	1.04e-05	-0.920073	1.05e-17	3.38e-15	-0.863843	9.19e-16	1.38e-13
FEZ2	protein_coding	ENSG00000171055	6.4738	0.548628	1.58e-08	6.31e-08	-0.298644	0.00210725	0.0290769	-0.273323	0.00499278	0.0436922	-0.108573	0.266221	0.587744	-0.202196	0.0389408	0.128769
ATP6V0E2	protein_coding	ENSG00000171130	1.72499	-0.635633	0.00432698	0.00838379	-1.96836	1.36e-12	1.84e-10	-2.21447	3.18e-14	5.58e-12	-1.66018	8.76e-13	1.45e-10	-1.90786	2.04e-15	2.89e-13
ZNF672	protein_coding	ENSG00000171161	4.50834	1.92636	1.17e-32	1.96e-31	0.57656	0.000101152	0.00269806	0.464015	0.00183497	0.0207062	0.107972	0.535354	0.812177	-0.214915	0.222651	0.429921
PDE7B	protein_coding	ENSG00000171408	4.96119	0.334483	0.00383187	0.00748428	-0.662429	2.1e-08	1.57e-06	-0.567117	1.77e-06	7.05e-05	-0.160491	0.168401	0.464836	-0.44074	0.000184216	0.00202227
SCG2	protein_coding	ENSG00000171951	3.30337	0.0133158	0.962305	0.984411	0.672741	0.000529826	0.00997594	0.577483	0.00356886	0.0343045	1.11769	1.15e-09	1.05e-07	1.01787	4.02e-08	1.45e-06
SLFN11	protein_coding	ENSG00000172716	5.62343	0.0734893	0.64117	0.710539	-0.546482	0.000564011	0.0105095	-0.523983	0.000963971	0.012727	0.193865	0.214238	0.527447	-0.26519	0.0915907	0.2381
LCLAT1	protein_coding	ENSG00000172954	5.28678	0.873897	4.98e-15	3.33e-14	-0.420286	0.000153811	0.00378264	-0.602335	8.71e-08	4.94e-06	-0.0755685	0.508126	0.795757	0.316755	0.00484528	0.0272303
SH3RF3	protein_coding	ENSG00000172985	5.2156	0.521079	5.83e-05	0.000152605	-0.379996	0.00341527	0.0407586	-0.608418	3.66e-06	0.000127216	0.0393926	0.766731	0.940958	-0.0119936	0.931047	0.992093
ABLIM3	protein_coding	ENSG00000173210	6.76615	-0.264529	0.0156948	0.0272332	0.685829	3.75e-10	3.74e-08	0.388064	0.000415582	0.00650569	0.624209	7.17e-09	5.6e-07	0.141698	0.19144	0.390459
MMRN2	protein_coding	ENSG00000173269	-0.980939	4.23809	3.52e-14	2.2e-13	-1.74164	4.72e-05	0.00146609	-3.10865	2.65e-09	2.16e-07	1.23771	0.171573	0.469399	0.435307	1	1
ZBTB21	protein_coding	ENSG00000173276	5.39689	1.39786	2.16e-40	5.11e-39	-0.53306	2.25e-07	1.37e-05	-0.489044	2.2e-06	8.38e-05	0.131133	0.225447	0.540174	-0.00629201	0.958334	1
THAP2	protein_coding	ENSG00000173451	4.11287	3.29744	3.92e-89	3.68e-87	-0.885799	4.79e-10	4.67e-08	-0.598904	2.42e-05	0.000624497	0.111428	0.561001	0.826816	-0.0461128	0.841228	0.946502
SMARCC1	protein_coding	ENSG00000173473	7.06055	0.204112	0.0375763	0.0600033	-0.504589	3.34e-07	1.97e-05	-0.676254	1.09e-11	1.34e-09	-0.424101	1.63e-05	0.000517404	-0.365186	0.000208212	0.00221325
JUP	protein_coding	ENSG00000173801	4.19776	-2.42089	5.32e-48	1.66e-46	0.701721	0.000106487	0.00279317	0.565142	0.00207665	0.0228932	0.172089	0.224272	0.539659	0.0445346	0.760608	0.899964
PMS2P6	unprocessed_pseudogene	ENSG00000174384	-1.41433	0.345319	0.567494	0.642439	-2.12235	0.00162273	0.0237852	-2.24415	0.00257958	0.0269658	-0.627144	0.279728	0.604059	0.25541	0.688527	0.851424
SLCO2A1	protein_coding	ENSG00000174640	-0.958935	4.13308	1.1e-14	7.15e-14	-1.519	0.000104823	0.00276326	-1.38581	0.000456146	0.00702902	0.266812	1	1	-4.30449	0.0659245	0.189265
A2M	protein_coding	ENSG00000175899	9.19033	-0.396038	0.00178132	0.00370263	-0.383794	0.00249733	0.0325087	-0.691152	5.89e-08	3.46e-06	-0.538723	2.17e-05	0.000655766	-0.907433	1.14e-12	1.01e-10
ULK1	protein_coding	ENSG00000177169	3.3934	-0.827096	1.05e-06	3.45e-06	0.548792	0.00168971	0.0245272	0.545284	0.00187138	0.0210567	-0.240781	0.129398	0.401383	0.0325981	0.839108	0.9454
RPS6KA3	protein_coding	ENSG00000177189	7.55122	1.93276	1.21e-70	7.1e-69	-0.385447	0.000242864	0.00546151	-0.637615	1.51e-09	1.28e-07	-0.0278824	0.797319	0.953638	-0.281323	0.00907741	0.0440636
NAP1L5	protein_coding	ENSG00000177432	3.27928	0.738306	6.63e-07	2.22e-06	-1.75567	2.23e-27	2.93e-24	-0.835281	4.83e-08	2.94e-06	-1.65461	9.76e-23	6.41e-20	-0.752381	2.29e-06	4.85e-05
POLR2L	protein_coding	ENSG00000177700	4.41093	-0.185916	0.209104	0.273735	0.537365	0.000245487	0.00550477	0.499004	0.000739289	0.0104709	0.0342813	0.818511	0.961685	0.215958	0.130561	0.302138
IMP3	protein_coding	ENSG00000177971	4.36081	0.744884	1.94e-08	7.66e-08	-0.502424	0.000160852	0.00390704	-0.598969	9.22e-06	0.00027484	-0.421455	0.00204007	0.0261886	-0.303802	0.0256466	0.0954422
CALR	protein_coding	ENSG00000179218	9.87012	-0.0996983	0.456461	0.53571	-0.671254	6.06e-07	3.32e-05	-0.892823	3.82e-11	4.21e-09	-0.763388	1.42e-08	1.03e-06	-0.852827	2.54e-10	1.58e-08
ZADH2	protein_coding	ENSG00000180011	5.05486	-0.151433	0.213799	0.279209	-0.538911	1.54e-05	0.000544248	-0.730349	7.77e-09	5.62e-07	-0.479307	7.3e-05	0.00183161	-0.329573	0.00632282	0.0333913
ZNF609	protein_coding	ENSG00000180357	6.2925	-0.217494	0.034591	0.0556365	0.452576	1.1e-05	0.000410166	0.320836	0.00193007	0.0216235	0.157776	0.11884	0.383891	0.0823211	0.418423	0.641387
GREM2	protein_coding	ENSG00000180875	5.51869	4.95321	5.38e-283	1.41e-279	-0.48352	3.92e-06	0.000171173	-0.82941	5.2e-15	1.04e-12	0.00532449	1	1	-0.382658	0.0402281	0.131759
TMEM45A	protein_coding	ENSG00000181458	5.0056	-0.409678	0.000785562	0.00172738	-0.460128	0.000258285	0.00574275	-1.10846	3.51e-17	8.77e-15	-0.310798	0.00974069	0.0788648	-0.77227	2.87e-10	1.75e-08
RAP2B	protein_coding	ENSG00000181467	4.76877	-0.063886	0.625799	0.696639	0.409873	0.00144921	0.0219456	0.433019	0.000843279	0.0115558	0.505208	4.79e-05	0.00128918	0.296786	0.0184585	0.0747443
TNFSF15	protein_coding	ENSG00000181634	4.70426	2.41034	2.16e-16	1.59e-15	-1.23402	1.14e-05	0.000422702	-0.971473	0.000518958	0.00785865	0.479301	0.0916658	0.331811	-0.446692	0.123443	0.290316
CHST15	protein_coding	ENSG00000182022	4.25121	1.39147	6.66e-15	4.39e-14	-0.507006	0.00350053	0.0413608	-0.793506	6.77e-06	0.000212232	0.38877	0.0302672	0.169136	0.411689	0.0222212	0.0858777
C1S	protein_coding	ENSG00000182326	8.6446	-0.231414	0.0394828	0.0626794	-0.610814	6.5e-08	4.53e-06	-1.12858	5.16e-23	2.32e-20	-0.500719	8.59e-06	0.000300242	-1.08616	1.26e-21	3.6e-19
GPC6	protein_coding	ENSG00000183098	7.37075	-0.11895	0.226661	0.293308	-0.426399	1.68e-05	0.000582889	-0.615056	6.63e-10	6.26e-08	-0.325246	0.000920756	0.0142023	-0.592024	1.99e-09	1.01e-07
SLITRK6	protein_coding	ENSG00000184564	4.74285	-3.31218	5.38e-66	2.88e-64	0.716584	0.000340698	0.00710112	0.731728	0.000301493	0.00506148	-0.411162	0.012639	0.095331	-0.220314	0.180975	0.376409
SNN	protein_coding	ENSG00000184602	4.67242	-0.882146	4.22e-13	2.44e-12	0.650008	1.69e-07	1.05e-05	0.926287	7.54e-14	1.25e-11	-0.0509088	0.658948	0.887682	0.201583	0.0761409	0.209547
PRR16	protein_coding	ENSG00000184838	4.34411	-1.48784	1.17e-22	1.26e-21	0.487499	0.00244698	0.0320228	1.07991	7.23e-12	9.12e-10	0.430966	0.00134117	0.0190986	0.758183	1.48e-08	5.9e-07
FLRT2	protein_coding	ENSG00000185070	5.81184	-0.955233	0.00102309	0.00220825	0.880946	0.00245268	0.0320597	1.10229	0.000158689	0.0030507	-0.112907	0.69503	0.909989	-0.267948	0.351882	0.578061
OLFML2A	protein_coding	ENSG00000185585	6.45772	-0.994271	4.48e-22	4.69e-21	-0.462298	1.09e-05	0.000408715	-0.810918	3.3e-14	5.66e-12	-0.571702	1.62e-08	1.16e-06	-0.945794	2.32e-20	5.71e-18
SHC4	protein_coding	ENSG00000185634	5.12	2.68274	1.67e-62	8.19e-61	-1.01253	1.26e-11	1.52e-09	-0.810861	5.58e-08	3.29e-06	0.0369575	0.824564	0.964061	-0.219274	0.182961	0.379038
ANKRD46	protein_coding	ENSG00000186106	3.47338	0.870037	1.87e-08	7.41e-08	-0.479835	0.00181521	0.0259428	-0.496949	0.00128328	0.0156455	-0.303537	0.0578051	0.254678	-0.260598	0.106651	0.263527
INSIG1	protein_coding	ENSG00000186480	7.19462	2.11117	2.75e-60	1.25e-58	-1.95438	2.76e-52	2.17e-48	-0.908538	3.46e-13	5.04e-11	-1.00694	4.27e-15	9.34e-13	0.539862	1.76e-05	0.000280056
MIR22HG	lincRNA	ENSG00000186594	6.88946	1.40758	6.07e-53	2.23e-51	-0.298777	0.000892942	0.0151573	-0.643623	1.34e-12	1.85e-10	-0.0470774	0.613172	0.86027	0.0704078	0.447479	0.666434
ENTPD5	protein_coding	ENSG00000187097	4.37805	-0.26377	0.0297716	0.0486392	-0.809665	3.17e-10	3.25e-08	-0.662226	2.77e-07	1.38e-05	-0.69035	1.04e-08	7.8e-07	-0.726	2.46e-09	1.22e-07
LUZP2	protein_coding	ENSG00000187398	2.83136	-0.498697	0.00609728	0.0114603	-1.13344	1.57e-08	1.2e-06	-1.30268	2.55e-10	2.58e-08	-1.23207	2.16e-11	2.91e-09	-1.69233	1.26e-18	2.54e-16
COL14A1	protein_coding	ENSG00000187955	7.02226	-0.454709	0.000863918	0.00188678	-1.26183	1.33e-19	4.67e-17	-2.07446	1.96e-47	7.71e-44	-1.30378	4.62e-21	2.28e-18	-2.12718	1.57e-50	4.14e-47
WNT7B	protein_coding	ENSG00000188064	-0.717827	8.69417	4.63e-24	5.34e-23	-1.04602	0.00104706	0.0169731	-2.01183	4.33e-08	2.69e-06	0	1	1	2.40299	1	1
COL4A5	protein_coding	ENSG00000188153	6.36918	-1.07206	2.65e-12	1.44e-11	-1.67642	4.48e-26	4.42e-23	-1.96375	3.39e-34	3.56e-31	-0.693902	4.76e-06	0.000184024	-1.59328	9.43e-25	3.46e-22
PCDH18	protein_coding	ENSG00000189184	8.73645	-2.6314	3.37e-62	1.64e-60	-0.761527	5.33e-07	2.96e-05	-0.731812	1.48e-06	6.02e-05	-0.120292	0.417992	0.732252	-0.513345	0.000566589	0.00497035
ZNF699	protein_coding	ENSG00000196110	2.66433	1.0073	4.52e-09	1.9e-08	-0.817588	2.37e-06	0.000108506	-1.00685	2.03e-08	1.38e-06	0.0658996	0.728885	0.924016	0.216801	0.226283	0.434809
S100A4	protein_coding	ENSG00000196154	6.03117	-0.404569	0.000191758	0.000465058	0.969771	2.2e-19	7.37e-17	0.839518	1.01e-14	1.91e-12	1.09199	6.78e-26	5.62e-23	0.800708	1.55e-14	1.94e-12
CD55	protein_coding	ENSG00000196352	6.23117	1.68809	8.55e-47	2.54e-45	-0.336286	0.00319883	0.0390179	-0.713248	5.91e-10	5.65e-08	-0.117704	0.32305	0.647275	0.0849521	0.474966	0.689826
MME	protein_coding	ENSG00000196549	7.17352	-0.18787	0.131736	0.183279	-0.48766	0.000101726	0.00270879	-0.355962	0.00455499	0.0409145	-0.497019	6.68e-05	0.00169641	-0.459112	0.000232838	0.00241319
HRH1	protein_coding	ENSG00000196639	5.05128	-0.696864	6.61e-09	2.73e-08	-0.375573	0.00266449	0.0340106	-1.07074	2.81e-16	6.62e-14	0.0182761	0.877373	0.98842	-0.787911	3.82e-11	2.68e-09
ALKAL1	protein_coding	ENSG00000196711	1.1147	2.2325	2.03e-09	8.85e-09	-2.39511	3.51e-10	3.55e-08	-1.72462	3.02e-06	0.000107968	-1.66105	0.000218585	0.00447502	-0.703494	0.101513	0.255182
KPNA5	protein_coding	ENSG00000196911	3.6977	0.397586	0.0149426	0.0260369	-0.591104	0.000392752	0.00793514	-0.539695	0.00121949	0.0151648	-0.0637575	0.708958	0.916815	-0.10222	0.54528	0.748025
FUT11	protein_coding	ENSG00000196968	4.64414	0.19576	0.0750512	0.111447	-0.546993	1.2e-06	6.06e-05	-0.555128	1.11e-06	4.65e-05	-0.485945	1.12e-05	0.000378443	-0.452162	4.97e-05	0.000676073
SIGLEC15	protein_coding	ENSG00000197046	1.63166	4.20124	1.63e-50	5.46e-49	-0.811236	6.35e-05	0.00184151	-1.01117	1.48e-06	6.02e-05	1.53394	1.87e-05	0.000577927	0.190163	0.699668	0.859688
ADARB1	protein_coding	ENSG00000197381	6.21958	1.41752	5.58e-16	3.99e-15	-0.841968	1.12e-06	5.78e-05	-0.674651	9.31e-05	0.00193203	-0.233165	0.180144	0.481952	-0.594008	0.000700806	0.00591409
HTT	protein_coding	ENSG00000197386	6.19271	-0.135097	0.193376	0.255866	0.322117	0.00192638	0.0271774	0.452986	1.3e-05	0.000365002	0.0189502	0.855673	0.980008	0.233011	0.0225336	0.0866179
PDGFA	protein_coding	ENSG00000197461	2.50452	2.6838	1.16e-32	1.94e-31	-0.588327	0.00298048	0.0371124	-1.06872	1.88e-07	9.79e-06	-0.716452	0.00846678	0.0718133	-0.240706	0.393638	0.618489
MYO5A	protein_coding	ENSG00000197535	6.71863	1.08067	1.26e-32	2.11e-31	-0.404131	6.88e-06	0.000281302	-0.608933	1.73e-11	2.03e-09	-0.438316	1.92e-06	8.27e-05	-0.532866	8.95e-09	3.8e-07
DPP4	protein_coding	ENSG00000197635	6.28974	-0.193936	0.106185	0.151732	-0.399492	0.0010035	0.0164441	-0.382343	0.00171251	0.0196334	-0.263292	0.0275486	0.159478	-0.384741	0.00132276	0.00987307
TXNRD1	protein_coding	ENSG00000198431	9.77943	1.36386	4.79e-28	6.67e-27	-0.521363	2.03e-05	0.000685285	-0.436721	0.000353491	0.00574478	0.159395	0.192278	0.499763	0.12816	0.294676	0.514084
SMOC1	protein_coding	ENSG00000198732	3.84572	1.65064	4.81e-16	3.45e-15	-0.573232	0.00350271	0.0413608	-0.682115	0.000588186	0.00873085	-0.55154	0.00884716	0.0742634	-0.967909	9.79e-06	0.000172661
OSTC	protein_coding	ENSG00000198856	7.22344	0.326884	0.00121541	0.00259484	-0.303344	0.0027286	0.0346325	-1.14185	1.86e-28	1.33e-25	-0.11372	0.260352	0.581247	-1.16335	1.86e-29	1.27e-26
PCMTD2	protein_coding	ENSG00000203880	5.40918	-1.64934	4.42e-42	1.12e-40	0.359239	0.00443057	0.0493594	0.484809	0.000129253	0.00256617	0.401472	0.000281845	0.00552034	0.220617	0.0475813	0.14912
TAP2	protein_coding	ENSG00000204267	4.3551	0.697915	1.3e-08	5.24e-08	-0.499387	5.26e-05	0.00160113	-0.491722	7.85e-05	0.00165626	-0.339913	0.00707992	0.0636668	-0.337318	0.0080164	0.0400414
HMGN1	protein_coding	ENSG00000205581	7.0218	-0.00673442	0.944903	0.968873	-0.516328	6.7e-08	4.63e-06	-0.394108	3.79e-05	0.000900484	-0.326182	0.000555036	0.00953115	-0.393638	3.25e-05	0.000471854
DIO2	protein_coding	ENSG00000211448	3.78266	2.5503	4.96e-50	1.64e-48	-0.825057	1.36e-07	8.78e-06	-0.51403	0.000924236	0.0123055	0.0552889	0.782194	0.947481	-0.739571	0.000217679	0.00229685
ZNF580	protein_coding	ENSG00000213015	3.2578	-0.415301	0.0183538	0.0314181	-0.586472	0.00170904	0.0247622	-0.891011	4.28e-06	0.000144612	-0.530356	0.00224434	0.0281911	-0.729034	3.45e-05	0.000496019
ZNF611	protein_coding	ENSG00000213020	4.7016	1.79356	1.65e-41	4.09e-40	-0.497877	7.96e-05	0.00222789	-0.619929	1.14e-06	4.78e-05	-0.00665227	0.969138	1	-0.0288215	0.826508	0.938762
MLLT11	protein_coding	ENSG00000213190	4.77314	0.72981	2.32e-10	1.08e-09	-0.646714	2.48e-08	1.83e-06	-0.350992	0.00237506	0.025349	-0.518131	1.29e-05	0.000423685	-0.173464	0.143475	0.321315
DNASE1	protein_coding	ENSG00000213918	3.55581	-1.78719	5.35e-29	7.8e-28	0.6823	9.02e-05	0.00245961	0.643944	0.000288497	0.00490814	-0.112821	0.416586	0.731043	-0.0620544	0.65862	0.830083
ITGA1	protein_coding	ENSG00000213949	7.83255	0.492259	4.37e-06	1.32e-05	-0.776342	6.06e-13	8.61e-11	-0.450044	2.79e-05	0.000696404	-0.695434	1.12e-10	1.29e-08	-0.342077	0.00144599	0.0106268
FNIP1	protein_coding	ENSG00000217128	5.66602	0.0472028	0.69518	0.7595	0.528967	8.79e-06	0.000345909	0.461941	0.000113217	0.00227067	0.317375	0.00692377	0.0626917	0.333751	0.00468743	0.0265133
TRIM16	protein_coding	ENSG00000221926	3.22405	-0.164966	0.280032	0.353154	-0.474338	0.00343691	0.040836	-0.618222	0.000233394	0.00416201	0.188986	0.193618	0.501545	-0.239112	0.112888	0.273905
APOL6	protein_coding	ENSG00000221963	3.9625	-2.66844	5.07e-44	1.37e-42	-1.55335	5.47e-12	6.73e-10	-1.12677	3.37e-07	1.65e-05	-1.31057	7.32e-14	1.44e-11	-1.88868	1.76e-25	6.62e-23
CYTOR	lincRNA	ENSG00000222041	5.97689	2.20855	6.81e-59	2.98e-57	-0.397189	0.00228212	0.0305168	-0.527989	5.42e-05	0.00122083	-0.0919461	0.505676	0.794209	0.400065	0.00337213	0.0206119
ZNF844	protein_coding	ENSG00000223547	3.17121	-0.169518	0.475869	0.554442	-0.859019	0.000475811	0.00920322	-0.690061	0.00486863	0.0428765	-0.220175	0.343009	0.665915	-0.156734	0.504526	0.715413
HBD	protein_coding	ENSG00000223609	0.390584	-0.810153	0.0393314	0.0624643	-1.88678	8.7e-05	0.00238553	-1.39445	0.00308652	0.0309356	-2.29447	6.73e-08	4.31e-06	-1.50528	0.000202168	0.0021769
C4B	protein_coding	ENSG00000224389	-0.950505	-0.774052	0.0904811	0.131594	-2.19611	0.000900291	0.015244	-2.00369	0.00312173	0.0312054	-1.30177	0.00334091	0.037115	-2.37121	5.18e-06	9.93e-05
DNM3OS	antisense	ENSG00000230630	3.76691	0.792083	9.37e-07	3.09e-06	-0.501116	0.00197107	0.0275705	-0.456192	0.00501892	0.0438571	-0.0878553	0.602164	0.853721	-0.270675	0.107885	0.265527
DIRC3	lincRNA	ENSG00000231672	1.28183	1.79504	1.72e-12	9.48e-12	-0.716782	0.00212437	0.0292184	-0.789502	0.00107956	0.0138924	0.27372	0.37884	0.700735	-0.367018	0.257291	0.47032
HLA-B	protein_coding	ENSG00000234745	5.52135	0.19676	0.0608893	0.0923296	-0.518527	1.08e-06	5.61e-05	-0.621287	7.18e-09	5.29e-07	-0.510009	1.28e-06	5.72e-05	-0.658979	6.01e-10	3.48e-08
RNF217-AS1	antisense	ENSG00000236548	1.87828	-0.676845	0.0105774	0.0189695	-1.24013	2.76e-05	0.000907822	-1.17888	8.87e-05	0.00185404	-1.48789	3.36e-08	2.23e-06	-1.15617	1.31e-05	0.000219365
PITRM1-AS1	antisense	ENSG00000237399	0.0329717	2.41715	4.87e-11	2.4e-10	-1.02269	0.00207831	0.0287895	-1.01563	0.00240222	0.0255351	-0.733592	0.17382	0.473587	-0.176355	0.797713	0.920918
RNF103	protein_coding	ENSG00000239305	4.98848	0.141602	0.238473	0.306755	-0.457736	0.000177456	0.00421933	-0.377293	0.00212769	0.023341	0.0777628	0.51272	0.798218	-0.0295849	0.806186	0.925954
LINC00973	lincRNA	ENSG00000240476	0.649881	3.62544	3.96e-14	2.47e-13	0.940609	0.00107446	0.0173543	1.31943	2.76e-06	0.000100654	2.21586	0.000142733	0.0031727	2.34498	3.42e-05	0.000492936
RAB30-AS1	lincRNA	ENSG00000246067	1.96278	-0.182443	0.452066	0.531422	0.659804	0.00395085	0.045479	0.826231	0.000273193	0.00472217	0.134017	0.539495	0.814791	0.185567	0.398364	0.622697
LINC00968	lincRNA	ENSG00000246430	2.66039	-1.06635	1.42e-07	5.14e-07	-0.697481	0.00237967	0.0313918	-0.887604	0.00014853	0.0028694	-0.313178	0.0988144	0.345543	-0.712305	0.000238239	0.00245465
LINC02432	lincRNA	ENSG00000248810	0.0106654	2.5993	9.04e-13	5.07e-12	-1.45585	1.27e-05	0.000461362	-1.44163	2.25e-05	0.000584861	-0.103567	0.898276	0.993746	0.495331	0.293676	0.513022
AC114284.1	lincRNA	ENSG00000248927	0.588986	-1.44862	0.00170299	0.00355386	1.53625	0.000855387	0.0146728	1.96	1.22e-05	0.00034593	1.11908	0.000602853	0.0101968	0.894639	0.00751519	0.0380918
NOP14-AS1	antisense	ENSG00000249673	3.62835	1.47833	3.36e-27	4.49e-26	-0.414843	0.00142381	0.0216441	-0.530589	6.49e-05	0.00141045	-0.0502423	0.737259	0.928124	-0.192251	0.205917	0.410211
MEX3A	protein_coding	ENSG00000254726	4.30119	-1.52041	2.18e-25	2.68e-24	0.664205	1.26e-05	0.000460584	0.471746	0.00238429	0.0254303	-0.148808	0.26566	0.587275	-0.09899	0.462209	0.680029
CTSO	protein_coding	ENSG00000256043	4.96426	-0.144227	0.189374	0.251287	-0.823172	5.5e-13	7.88e-11	-0.842677	2.79e-13	4.23e-11	-0.432296	7.03e-05	0.00177649	-0.869671	4.92e-15	6.58e-13
CYP2B7P	transcribed_unprocessed_pseudogene	ENSG00000256612	-1.46517	0.901174	0.105048	0.150284	-1.95691	0.00238551	0.0314425	-2.72939	0.000335986	0.00555295	-0.365749	0.598415	0.851775	-1.35718	0.0766916	0.210695
RASSF5	protein_coding	ENSG00000266094	1.86329	-0.307082	0.156324	0.212952	-0.734469	0.00229264	0.0306067	-0.812601	0.0012198	0.0151648	0.0753207	0.740783	0.929194	-0.13161	0.54026	0.743618
MGC12916	lincRNA	ENSG00000266709	3.75685	3.99331	6.11e-88	5.44e-86	-0.94441	1.14e-08	8.93e-07	-0.674175	4.3e-05	0.00100076	-0.353483	0.169542	0.466189	-0.0419408	0.921192	0.987313
SNHG8	lincRNA	ENSG00000269893	4.92202	-0.530813	4.76e-06	1.43e-05	0.399634	0.00070984	0.0127014	0.433651	0.000261628	0.0045724	0.153278	0.169262	0.46579	0.0977872	0.38473	0.609819
AC006449.6	lincRNA	ENSG00000277969	-0.95488	0.506788	0.380277	0.45845	-1.96221	0.00194247	0.0273647	-2.09019	0.00168663	0.0194073	-0.3818	0.530535	0.809213	-0.815734	0.178778	0.373515
AP000866.6	sense_intronic	ENSG00000279342	0.613268	-1.00977	0.0193414	0.0329157	1.59055	8.54e-05	0.00235385	1.22291	0.00488477	0.0429385	0.306288	0.395066	0.713951	-0.0546907	0.912807	0.983202
