# Supplementary material
Source: HighWire-hosted journal article supplement (doi:10.1101/rna.075309.120)
Supplement: Supplementary_Table_7_MIR222HG_interacting_peptides.xlsx [file Supplementary_Table_7_MIR222HG_interacting_peptides.xlsx]

## Sheet: Rep_1
Accession	Gene	Description	# Unique Peptides	# Peptides	# PSMs
P23396	RPS3	40S ribosomal protein S3	1	1	1
			Sequence	Modifications	Qvality PEP	# PSMs	# Missed Cleavages	Theo. MH+ [Da]
			AELNEFLTR		0.0742885	1	0	1092.57
P18621	RPL17	60S ribosomal protein L17	1	1	1
			Sequence	Modifications	Qvality PEP	# PSMs	# Missed Cleavages	Theo. MH+ [Da]
			YSLDPENPTK		0.163274	1	0	1163.56
P35268	RPL22	60S ribosomal protein L22	1	1	1
			Sequence	Modifications	Qvality PEP	# PSMs	# Missed Cleavages	Theo. MH+ [Da]
			AGNLGGGVVTIER		0.0799585	1	0	1242.68
O00571	DDX3X	ATP-dependent RNA helicase DDX3X	5	5	10
			Sequence	Modifications	Qvality PEP	# PSMs	# Missed Cleavages	Theo. MH+ [Da]
			QSSGASSSSFSSSR		0.112252	1	0	1361.59
			SFLLDLLNATGK		0.104841	2	0	1291.73
			SPILVATAVAAR		0.0913942	3	0	1168.7
			ELAVQIYEEAR		0.00982988	2	0	1320.68
			DLLDLLVEAK		0.163274	2	0	1128.65
Q562R1	ACTBL2	Beta-actin-like protein 2	1	2	13
			Sequence	Modifications	Qvality PEP	# PSMs	# Missed Cleavages	Theo. MH+ [Da]
			VAPDEHPILLTEAPLNPK		0.0690104	4	0	1954.06
			SYELPDGQVITIGNER		0.0217251	9	0	1790.89
P51991	HNRNPA3	Heterogeneous nuclear ribonucleoprotein A3	3	3	4
			Sequence	Modifications	Qvality PEP	# PSMs	# Missed Cleavages	Theo. MH+ [Da]
			IETIEVMEDR	1xOxidation [M7]	0.0252298	2	0	1250.59
			GFAFVTFDDHDTVDK		0.150857	1	0	1713.78
			EDSVKPGAHLTVK		0.2104	1	0	1380.75
P31943; P55795	HNRNPH1; HNRNPH2	Heterogeneous nuclear ribonucleoprotein H; Heterogeneous nuclear ribonucleoprotein H2	4	4	6
			Sequence	Modifications	Qvality PEP	# PSMs	# Missed Cleavages	Theo. MH+ [Da]
			STGEAFVQFASQEIAEK		0.00203439	3	0	1841.89
			HTGPNSPDTANDGFVR		0.0711379	1	0	1684.77
			EGRPSGEAFVELESEDEVK		0.147736	1	0	2106.98
			ATENDIYNFFSPLNPVR		0.195626	1	0	1996.98
O60506	SYNCRIP	Heterogeneous nuclear ribonucleoprotein Q	1	3	5
			Sequence	Modifications	Qvality PEP	# PSMs	# Missed Cleavages	Theo. MH+ [Da]
			TGYTLDVTTGQR		0.0495661	1	0	1311.65
			DLFEDELVPLFEK		0.126965	3	0	1593.8
			GFCFLEYEDHK	1xCarbamidomethyl [C3]	0.142866	1	0	1444.62
O43390	HNRNPR	Heterogeneous nuclear ribonucleoprotein R	1	3	3
			Sequence	Modifications	Qvality PEP	# PSMs	# Missed Cleavages	Theo. MH+ [Da]
			TGYTLDVTTGQR		0.0495661	1	0	1311.65
			DLYEDELVPLFEK		0.142866	1	0	1609.8
			GFCFLEYEDHK	1xCarbamidomethyl [C3]	0.142866	1	0	1444.62
Q00839	HNRNPU	Heterogeneous nuclear ribonucleoprotein U	15	15	35
			Sequence	Modifications	Qvality PEP	# PSMs	# Missed Cleavages	Theo. MH+ [Da]
			QMADTGKLNTLLQR	1xOxidation [M2]	0.0775746	1	1	1604.84
			NGQDLGVAFK		0.110354	2	0	1048.54
			NFILDQTNVSAAAQR		0.00184614	9	0	1647.84
			MCLFAGFQR	1xCarbamidomethyl [C2]; 1xOxidation [M1]	0.0913942	1	0	1145.52
			RNFILDQTNVSAAAQR		0.0169034	2	1	1803.95
			YNILGTNTIMDK	1xOxidation [M10]	0.111299	2	0	1398.69
			YNILGTNTIMDK		0.0346142	1	0	1382.7
			SSGPTSLFAVTVAPPGAR		0.0132074	5	0	1714.91
			EKPYFPIPEEYTFIQNVPLEDR		0.00629625	4	0	2724.36
			FDENDVITCFANFESDEVELSYAK	1xCarbamidomethyl [C9]	0.0405315	1	0	2842.24
			KDCEVVMMIGLPGAGK	1xCarbamidomethyl [C3]; 2xOxidation [M7; M8]	0.0995903	1	1	1736.84
			GYFEYIEENK		0.0616388	1	0	1291.58
			GYFEYIEENKYSR		0.010138	2	1	1697.78
			DIDIHEVR		0.162598	1	0	996.511
			KAVVVCPK	1xCarbamidomethyl [C6]	0.169473	1	1	900.534
			FIEIAAR		0.198024	1	0	819.472
A2NJV5	IGKV2-29	Immunoglobulin kappa variable 2-29	1	1	2
			Sequence	Modifications	Qvality PEP	# PSMs	# Missed Cleavages	Theo. MH+ [Da]
			FSGVPDR		0.143467	2	0	777.389
Q12905	ILF2	Interleukin enhancer-binding factor 2	6	6	11
			Sequence	Modifications	Qvality PEP	# PSMs	# Missed Cleavages	Theo. MH+ [Da]
			NQDLAPNSAEQASILSLVTK		0.038794	1	0	2099.1
			ILPTLEAVAALGNK		0.00213559	6	0	1409.84
			ILGQEGDASYLASEISTWDGVIVTPSEK		0.0810017	1	0	2965.47
			VLQSALAAIR		0.0742885	1	0	1041.64
			KLDPELHLDIK		0.172296	1	1	1320.75
			GTMTTGHNVADLVVILK	1xOxidation [M3]	0.148978	1	0	1784.96
P11940	PABPC1	Polyadenylate-binding protein 1	9	9	10
			Sequence	Modifications	Qvality PEP	# PSMs	# Missed Cleavages	Theo. MH+ [Da]
			IVATKPLYVALAQR		0.0161038	1	0	1542.94
			LFPLIQAMHPTLAGK	1xOxidation [M8]	0.0962308	1	0	1652.92
			SLGYAYVNFQQPADAER		0.00721895	2	0	1928.91
			SKVDEAVAVLQAHQAK		0.0371303	1	1	1693.92
			EFSPFGTITSAK		0.0474469	1	0	1284.65
			GFGFVCFSSPEEATK	1xCarbamidomethyl [C6]	0.0243577	1	0	1662.75
			GYGFVHFETQEAAER		0.0265965	1	0	1740.8
			GFGFVSFER		0.162598	1	0	1045.51
			QIYVGR		0.203719	1	0	735.415
P17844	DDX5	Probable ATP-dependent RNA helicase DDX5	3	5	6
			Sequence	Modifications	Qvality PEP	# PSMs	# Missed Cleavages	Theo. MH+ [Da]
			TAQEVETYR		0.116637	1	0	1096.53
			FVINYDYPNSSEDYIHR		0.0248992	1	0	2131.97
			GVEICIATPGR	1xCarbamidomethyl [C5]	0.0803047	2	0	1172.61
			APILIATDVASR		0.0548	1	0	1226.71
			TTYLVLDEADR		0.143467	1	0	1295.65
P17066; P48741	HSPA6; HSPA7	Heat shock 70 kDa protein 6; Putative heat shock 70 kDa protein 7	1	1	1
			Sequence	Modifications	Qvality PEP	# PSMs	# Missed Cleavages	Theo. MH+ [Da]
			VEILANDQGNR		0.0949991	1	0	1228.63
Q12906	ILF3	Interleukin enhancer-binding factor 3	18	18	36
			Sequence	Modifications	Qvality PEP	# PSMs	# Missed Cleavages	Theo. MH+ [Da]
			QQREDITQSAQHALR		0.113696	1	1	1780.9
			NENPVDYTVQIPPSTTYAITPMK	1xOxidation [M22]	0.0111214	1	0	2595.26
			LVSQTGPVHAPIFTMSVEVDGNSFEASGPSK	1xOxidation [M15]	0.110826	1	0	3204.55
			LFPDTPLALDANK		0.0225035	3	0	1414.76
			YELISETGGSHDKR		0.00348562	1	1	1591.77
			VLQDMGLPTGAEGR	1xOxidation [M5]	0.103948	1	0	1459.72
			VLQDMGLPTGAEGR		0.103948	1	0	1443.73
			VLGMDPLPSK		0.0468287	2	0	1056.58
			VLAGETLSVNDPPDVLDR		0.00282017	2	0	1909.99
			LAAFGQLHK		0.112731	1	0	984.563
			EATDAIGHLDR		0.0684141	2	0	1197.59
			EPPLSLTIHLTSPVVR		0.00861181	2	0	1759.01
			FVMEVEVDGQK		0.046421	2	0	1280.62
			FVMEVEVDGQK	1xOxidation [M3]	0.00652243	1	0	1296.61
			EDITQSAQHALR		0.0175096	1	0	1368.69
			AYAALAALEK		0.0726966	4	0	1020.57
			HSSVYPTQEELEAVQNMVSHTER		0.00554006	2	0	2671.24
			HSSVYPTQEELEAVQNMVSHTER	1xOxidation [M17]	0.04724	2	0	2687.24
			CLAALASLR	1xCarbamidomethyl [C1]	0.030746	3	0	974.545
			NPVMELNEK	1xOxidation [M4]	0.132445	2	0	1089.52
			IFVNDDR		0.188582	1	0	878.437

## Sheet: Rep_2
Accession	Gene	Description	# Unique Peptides	# Peptides	# PSMs
P35268	RPL22	60S ribosomal protein L22	1	1	1
			Sequence	Modifications	Qvality PEP	# PSMs	# Missed Cleavages	Theo. MH+ [Da]
			ITVTSEVPFSK		0.0392458	1	0	1207.66
P46776	RPL27A	60S ribosomal protein L27a	1	1	3
			Sequence	Modifications	Qvality PEP	# PSMs	# Missed Cleavages	Theo. MH+ [Da]
			TGAAPIIDVVR		0.0689575	3	0	1111.65
P39023	RPL3	60S ribosomal protein L3	1	1	1
			Sequence	Modifications	Qvality PEP	# PSMs	# Missed Cleavages	Theo. MH+ [Da]
			NNASTDYDLSDK		0.0927855	1	0	1342.58
O00571	DDX3X	ATP-dependent RNA helicase DDX3X	3	4	12
			Sequence	Modifications	Qvality PEP	# PSMs	# Missed Cleavages	Theo. MH+ [Da]
			MLDMGFEPQIR	2xOxidation [M1; M4]	0.070235	2	0	1368.63
			SPILVATAVAAR		0.0265529	3	0	1168.7
			DLLDLLVEAK		0.0728591	4	0	1128.65
			ELAVQIYEEAR		0.00941838	3	0	1320.68
Q562R1	ACTBL2	Beta-actin-like protein 2	1	3	7
			Sequence	Modifications	Qvality PEP	# PSMs	# Missed Cleavages	Theo. MH+ [Da]
			IIAPPER		0.116778	1	0	795.472
			SYELPDGQVITIGNER		0.00660159	4	0	1790.89
			VAPDEHPILLTEAPLNPK		0.00807186	2	0	1954.06
P78563	ADARB1	Double-stranded RNA-specific editase 1	1	1	1
			Sequence	Modifications	Qvality PEP	# PSMs	# Missed Cleavages	Theo. MH+ [Da]
			VLAGVVMTTGTDVK	1xOxidation [M7]	0.00347813	1	0	1406.76
Q96AE4	FUBP1	Far upstream element-binding protein 1	1	1	1
			Sequence	Modifications	Qvality PEP	# PSMs	# Missed Cleavages	Theo. MH+ [Da]
			IGGNEGIDVPIPR		0.102039	1	0	1336.72
P51991	HNRNPA3	Heterogeneous nuclear ribonucleoprotein A3	1	1	1
			Sequence	Modifications	Qvality PEP	# PSMs	# Missed Cleavages	Theo. MH+ [Da]
			IETIEVMEDR	1xOxidation [M7]	0.0813118	1	0	1250.59
P31943; P55795	HNRNPH1; HNRNPH2	Heterogeneous nuclear ribonucleoprotein H; Heterogeneous nuclear ribonucleoprotein H2	2	2	2
			Sequence	Modifications	Qvality PEP	# PSMs	# Missed Cleavages	Theo. MH+ [Da]
			STGEAFVQFASQEIAEK		0.127116	1	0	1841.89
			HTGPNSPDTANDGFVR		0.00136467	1	0	1684.77
O60506	SYNCRIP	Heterogeneous nuclear ribonucleoprotein Q	1	2	2
			Sequence	Modifications	Qvality PEP	# PSMs	# Missed Cleavages	Theo. MH+ [Da]
			LFVGSIPK		0.123763	1	0	860.524
			DLFEDELVPLFEK		0.117302	1	0	1593.8
O43390	HNRNPR	Heterogeneous nuclear ribonucleoprotein R	2	3	3
			Sequence	Modifications	Qvality PEP	# PSMs	# Missed Cleavages	Theo. MH+ [Da]
			NLATTVTEEILEK		0.0436647	1	0	1460.78
			LFVGSIPK		0.123763	1	0	860.524
			DLYEDELVPLFEK		0.0394284	1	0	1609.8
Q00839	HNRNPU	Heterogeneous nuclear ribonucleoprotein U	9	9	26
			Sequence	Modifications	Qvality PEP	# PSMs	# Missed Cleavages	Theo. MH+ [Da]
			NFILDQTNVSAAAQR		0.00133313	8	0	1647.84
			NGQDLGVAFK		0.0692747	2	0	1048.54
			SSGPTSLFAVTVAPPGAR		0.00429305	6	0	1714.91
			APQCLGK	1xCarbamidomethyl [C4]	0.115737	1	0	773.397
			DLPEHAVLK		0.103898	2	0	1021.57
			EKPYFPIPEEYTFIQNVPLEDR		0.0273055	3	0	2724.36
			GYFEYIEENK		0.0494803	2	0	1291.58
			GYFEYIEENKYSR		0.125989	1	1	1697.78
			KAVVVCPK	1xCarbamidomethyl [C6]	0.103898	1	1	900.534
Q1KMD3	HNRNPUL2	Heterogeneous nuclear ribonucleoprotein U-like protein 2	2	2	2
			Sequence	Modifications	Qvality PEP	# PSMs	# Missed Cleavages	Theo. MH+ [Da]
			DLLVQQASQCLSK	1xCarbamidomethyl [C10]	0.0125253	1	0	1489.77
			GLEEPEMDPK	1xOxidation [M7]	0.053279	1	0	1160.51
Q12905	ILF2	Interleukin enhancer-binding factor 2	5	5	8
			Sequence	Modifications	Qvality PEP	# PSMs	# Missed Cleavages	Theo. MH+ [Da]
			ILPTLEAVAALGNK		0.00303689	4	0	1409.84
			NQDLAPNSAEQASILSLVTK		0.0176142	1	0	2099.1
			VKPAPDETSFSEALLK		0.0617531	1	0	1731.92
			QPLALNVAYR		0.0355984	1	0	1144.65
			VLQSALAAIR		0.0296927	1	0	1041.64
Q12906	ILF3	Interleukin enhancer-binding factor 3	13	13	42
			Sequence	Modifications	Qvality PEP	# PSMs	# Missed Cleavages	Theo. MH+ [Da]
			LVSQTGPVHAPIFTMSVEVDGNSFEASGPSK	1xOxidation [M15]	0.05554	2	0	3204.55
			NPVMELNEK	1xOxidation [M4]	0.0299704	4	0	1089.52
			VLAGETLSVNDPPDVLDR		0.0188037	4	0	1909.99
			VLQDMGLPTGAEGR	1xOxidation [M5]	0.0631909	1	0	1459.72
			LFPDTPLALDANK		0.00527413	4	0	1414.76
			AYAALAALEK		0.0193377	2	0	1020.57
			CLAALASLR	1xCarbamidomethyl [C1]	0.0428624	2	0	974.545
			EATDAIGHLDR		0.132891	2	0	1197.59
			EDITQSAQHALR		0.0527889	4	0	1368.69
			EPPLSLTIHLTSPVVR		0.0127616	5	0	1759.01
			FVMEVEVDGQK		0.0708823	2	0	1280.62
			FVMEVEVDGQK	1xOxidation [M3]	0.0216289	5	0	1296.61
			HSSVYPTQEELEAVQNMVSHTER	1xOxidation [M17]	0.0862765	1	0	2687.24
			YELISETGGSHDKR		0.011623	4	1	1591.77
O43561	LAT	Linker for activation of T-cells family member 1	1	1	3
			Sequence	Modifications	Qvality PEP	# PSMs	# Missed Cleavages	Theo. MH+ [Da]
			DSAFSMESIDDYVNVPESGESAEASLDGSR	1xOxidation [M6]	0.00230444	3	0	3180.34
P11940	PABPC1	Polyadenylate-binding protein 1	9	9	9
			Sequence	Modifications	Qvality PEP	# PSMs	# Missed Cleavages	Theo. MH+ [Da]
			ITGMLLEIDNSELLHMLESPESLR	2xOxidation [M4; M16]	0.0203562	1	0	2772.38
			IVATKPLYVALAQR		0.0525456	1	0	1542.94
			NFGEDMDDER	1xOxidation [M6]	0.0890687	1	0	1243.45
			SKVDEAVAVLQAHQAK		0.0177794	1	1	1693.92
			SLGYAYVNFQQPADAER		0.109668	1	0	1928.91
			EFSPFGTITSAK		0.0587012	1	0	1284.65
			FSPAGPILSIR		0.0545237	1	0	1157.67
			GFGFVCFSSPEEATK	1xCarbamidomethyl [C6]	0.00529885	1	0	1662.75
			GYGFVHFETQEAAER		0.115219	1	0	1740.8
P17844	DDX5	Probable ATP-dependent RNA helicase DDX5	5	6	9
			Sequence	Modifications	Qvality PEP	# PSMs	# Missed Cleavages	Theo. MH+ [Da]
			APILIATDVASR		0.0234133	2	0	1226.71
			MLDMGFEPQIR	2xOxidation [M1; M4]	0.070235	2	0	1368.63
			TTYLVLDEADR		0.0573632	2	0	1295.65
			EANQAINPK		0.11942	1	0	984.511
			ELAQQVQQVAAEYCR	1xCarbamidomethyl [C14]	0.121032	1	0	1792.86
			GDGPICLVLAPTR	1xCarbamidomethyl [C6]	0.0346193	1	0	1368.73

## Sheet: Rep_3
Accession	Gene	Description	# Unique Peptides	# Peptides	# PSMs
P23396	RPS3	40S ribosomal protein S3	1	1	1
			Sequence	Modifications	Qvality PEP	# PSMs	# Missed Cleavages	Theo. MH+ [Da]
			AELNEFLTR		0.0514496	1	0	1092.57
P18621	RPL17	60S ribosomal protein L17	1	1	1
			Sequence	Modifications	Qvality PEP	# PSMs	# Missed Cleavages	Theo. MH+ [Da]
			YSLDPENPTK		0.136885	1	0	1163.56
P35268	RPL22	60S ribosomal protein L22	1	1	3
			Sequence	Modifications	Qvality PEP	# PSMs	# Missed Cleavages	Theo. MH+ [Da]
			AGNLGGGVVTIER		0.0141624	3	0	1242.68
P46776	RPL27A	60S ribosomal protein L27a	1	1	2
			Sequence	Modifications	Qvality PEP	# PSMs	# Missed Cleavages	Theo. MH+ [Da]
			TGAAPIIDVVR		0.0108016	2	0	1111.65
P39023	RPL3	60S ribosomal protein L3	1	1	2
			Sequence	Modifications	Qvality PEP	# PSMs	# Missed Cleavages	Theo. MH+ [Da]
			NNASTDYDLSDK		0.0307378	2	0	1342.58
O00571	DDX3X	ATP-dependent RNA helicase DDX3X	4	5	11
			Sequence	Modifications	Qvality PEP	# PSMs	# Missed Cleavages	Theo. MH+ [Da]
			MLDMGFEPQIR	2xOxidation [M1; M4]	0.0959923	1	0	1368.63
			SFLLDLLNATGK		0.00512504	3	0	1291.73
			SPILVATAVAAR		0.0413295	1	0	1168.7
			DLLDLLVEAK		0.0665932	3	0	1128.65
			ELAVQIYEEAR		0.0179877	3	0	1320.68
P78563	ADARB1	Double-stranded RNA-specific editase 1	2	2	2
			Sequence	Modifications	Qvality PEP	# PSMs	# Missed Cleavages	Theo. MH+ [Da]
			NPVMILNELRPGLK	1xOxidation [M4]	0.0287336	1	0	1609.91
			QPIPSEGLQLHLPQVLADAVSR		0.119298	1	0	2368.3
Q96AE4	FUBP1	Far upstream element-binding protein 1	1	1	1
			Sequence	Modifications	Qvality PEP	# PSMs	# Missed Cleavages	Theo. MH+ [Da]
			IGGNEGIDVPIPR		0.114745	1	0	1336.72
P51991	HNRNPA3	Heterogeneous nuclear ribonucleoprotein A3	2	2	2
			Sequence	Modifications	Qvality PEP	# PSMs	# Missed Cleavages	Theo. MH+ [Da]
			IETIEVMEDR	1xOxidation [M7]	0.112773	1	0	1250.59
			GFAFVTFDDHDTVDK		0.0200431	1	0	1713.78
P31943; P55795	HNRNPH1; HNRNPH2	Heterogeneous nuclear ribonucleoprotein H; Heterogeneous nuclear ribonucleoprotein H2	2	2	5
			Sequence	Modifications	Qvality PEP	# PSMs	# Missed Cleavages	Theo. MH+ [Da]
			STGEAFVQFASQEIAEK		0.00947542	3	0	1841.89
			HTGPNSPDTANDGFVR		0.0310153	2	0	1684.77
O60506	SYNCRIP	Heterogeneous nuclear ribonucleoprotein Q	1	2	2
			Sequence	Modifications	Qvality PEP	# PSMs	# Missed Cleavages	Theo. MH+ [Da]
			DLFEDELVPLFEK		0.0837874	1	0	1593.8
			AGPIWDLR		0.130027	1	0	927.505
O43390	HNRNPR	Heterogeneous nuclear ribonucleoprotein R	1	2	2
			Sequence	Modifications	Qvality PEP	# PSMs	# Missed Cleavages	Theo. MH+ [Da]
			NLATTVTEEILEK		0.0654224	1	0	1460.78
			AGPIWDLR		0.130027	1	0	927.505
Q00839	HNRNPU	Heterogeneous nuclear ribonucleoprotein U	11	11	38
			Sequence	Modifications	Qvality PEP	# PSMs	# Missed Cleavages	Theo. MH+ [Da]
			NFILDQTNVSAAAQR		6.29219e-05	9	0	1647.84
			NGQDLGVAFK		0.0241089	1	0	1048.54
			SSGPTSLFAVTVAPPGAR		0.00152553	7	0	1714.91
			VSELKEELK		0.0139719	1	1	1074.6
			YNILGTNTIMDK	1xOxidation [M10]	0.0852743	2	0	1398.69
			GYFEYIEENK		0.0282213	2	0	1291.58
			DLPEHAVLK		0.0388172	4	0	1021.57
			GYFEYIEENKYSR		0.0166602	4	1	1697.78
			EKPYFPIPEEYTFIQNVPLEDR		0.000669843	5	0	2724.36
			FIEIAAR		0.1219	2	0	819.472
			DIDIHEVR		0.142246	1	0	996.511
Q1KMD3	HNRNPUL2	Heterogeneous nuclear ribonucleoprotein U-like protein 2	2	2	3
			Sequence	Modifications	Qvality PEP	# PSMs	# Missed Cleavages	Theo. MH+ [Da]
			DLLVQQASQCLSK	1xCarbamidomethyl [C10]	0.00247494	1	0	1489.77
			EEPFFPPPEEFVFIHAVPVEER		0.00406978	2	0	2641.3
A2NJV5	IGKV2-29	Immunoglobulin kappa variable 2-29	1	1	1
			Sequence	Modifications	Qvality PEP	# PSMs	# Missed Cleavages	Theo. MH+ [Da]
			FSGVPDR		0.105203	1	0	777.389
Q12905	ILF2	Interleukin enhancer-binding factor 2	8	8	22
			Sequence	Modifications	Qvality PEP	# PSMs	# Missed Cleavages	Theo. MH+ [Da]
			ILPTLEAVAALGNK		0.00909791	9	0	1409.84
			NQDLAPNSAEQASILSLVTK		0.00808961	5	0	2099.1
			QPLALNVAYR		0.0310153	2	0	1144.65
			VHTVMTLEQQDMVCYTAQTLVR	1xCarbamidomethyl [C14]; 2xOxidation [M5; M12]	0.0445964	1	0	2655.26
			VKPAPDETSFSEALLK		0.00323168	2	0	1731.92
			VKPAPDETSFSEALLKR		0.0454013	1	1	1888.02
			LDPELHLDIK		0.0157112	1	0	1192.66
			GTMTTGHNVADLVVILK	1xOxidation [M3]	0.00396086	1	0	1784.96
Q12906	ILF3	Interleukin enhancer-binding factor 3	14	14	45
			Sequence	Modifications	Qvality PEP	# PSMs	# Missed Cleavages	Theo. MH+ [Da]
			LFPDTPLALDANK		0.00164	5	0	1414.76
			NPVMELNEK	1xOxidation [M4]	0.0267384	2	0	1089.52
			VLAGETLSVNDPPDVLDR		0.000422324	8	0	1909.99
			VLQDMGLPTGAEGR	1xOxidation [M5]	0.0660052	1	0	1459.72
			YELISETGGSHDKR		0.00524218	3	1	1591.77
			EATDAIGHLDR		0.0468444	1	0	1197.59
			EDITQSAQHALR		0.0215415	4	0	1368.69
			AYAALAALEK		0.0356471	3	0	1020.57
			FVMEVEVDGQK		0.00507891	4	0	1280.62
			FVMEVEVDGQK	1xOxidation [M3]	0.055008	1	0	1296.61
			GDLDLELVLLCK	1xCarbamidomethyl [C11]	0.00361842	2	0	1387.75
			GWPLELLCEK	1xCarbamidomethyl [C8]	0.0935047	3	0	1244.63
			EPPLSLTIHLTSPVVR		0.011199	4	0	1759.01
			CLAALASLR	1xCarbamidomethyl [C1]	0.0189023	3	0	974.545
			LFPDTPLALDANKK		0.119298	1	1	1542.85
O43561	LAT	Linker for activation of T-cells family member 1	1	1	1
			Sequence	Modifications	Qvality PEP	# PSMs	# Missed Cleavages	Theo. MH+ [Da]
			DSAFSMESIDDYVNVPESGESAEASLDGSR	1xOxidation [M6]	0.0642716	1	0	3180.34
P11940	PABPC1	Polyadenylate-binding protein 1	3	3	3
			Sequence	Modifications	Qvality PEP	# PSMs	# Missed Cleavages	Theo. MH+ [Da]
			NFGEDMDDER	1xOxidation [M6]	0.0930962	1	0	1243.45
			EFSPFGTITSAK		0.0156405	1	0	1284.65
			FSPAGPILSIR		0.0200431	1	0	1157.67
P17844	DDX5	Probable ATP-dependent RNA helicase DDX5	5	6	10
			Sequence	Modifications	Qvality PEP	# PSMs	# Missed Cleavages	Theo. MH+ [Da]
			MLDMGFEPQIR	2xOxidation [M1; M4]	0.0959923	1	0	1368.63
			TTYLVLDEADR		0.0496451	3	0	1295.65
			ELAQQVQQVAAEYCR	1xCarbamidomethyl [C14]	0.0381275	1	0	1792.86
			APILIATDVASR		0.017746	2	0	1226.71
			FVINYDYPNSSEDYIHR		0.00487644	1	0	2131.97
			GVEICIATPGR	1xCarbamidomethyl [C5]	0.128362	2	0	1172.61
P17066; P48741	HSPA6; HSPA7	Heat shock 70 kDa protein 6; Putative heat shock 70 kDa protein 7	1	2	2
			Sequence	Modifications	Qvality PEP	# PSMs	# Missed Cleavages	Theo. MH+ [Da]
			TTPSYVAFTDTER		0.0242176	1	0	1487.7
			VEILANDQGNR		0.0585456	1	0	1228.63
