# Supplementary material
Source: HighWire-hosted journal article supplement (doi:10.1101/rna.075309.120)
Supplement: Supplementary_Table_8_MIR222HG_RNA_complementarity.xlsx [file Supplementary_Table_8_MIR222HG_RNA_complementarity.xlsx]

## Sheet: Sheet1
Subject_mapped	Subject_SequenceID	Identities	Gaps	range_from_query(MIR222HG)	range_of_mapped_subject
Homo sapiens eukaryotic translation initiation factor 4E (EIF4E), transcript variant 4, mRNA	NM_001331017.1	34/42(81%)	2/42(4%)	147-188	3183-3144
Homo sapiens eukaryotic translation initiation factor 4E (EIF4E), transcript variant 4, mRNA	NM_001331017.1	16/18(89%)	0/18(0%)	758-775	3017-3000
Homo sapiens eukaryotic translation initiation factor 4E (EIF4E), transcript variant 4, mRNA	NM_001331017.1	22/28(79%)	0/28(0%)	947-974	6215-6188
Homo sapiens eukaryotic translation initiation factor 4E (EIF4E), transcript variant 4, mRNA	NM_001331017.1	14/15(93%)	0/15(0%)	957-971	6543-6529
Homo sapiens eukaryotic translation initiation factor 4E (EIF4E), transcript variant 4, mRNA	NM_001331017.1	14/15(93%)	0/15(0%)	1217-1231	8762-8748
Homo sapiens eukaryotic translation initiation factor 4E (EIF4E), transcript variant 4, mRNA	NM_001331017.1	15/17(88%)	0/17(0%)	1209-1225	5777-5761
Homo sapiens eukaryotic translation initiation factor 4E (EIF4E), transcript variant 4, mRNA	NM_001331017.1	12/12(100%)	0/12(0%)	1062-1073	7361-7350
Homo sapiens eukaryotic translation initiation factor 4E (EIF4E), transcript variant 4, mRNA	NM_001331017.1	18/22(82%)	0/22(0%)	475-496	7686-7665
Homo sapiens eukaryotic translation initiation factor 4E (EIF4E), transcript variant 4, mRNA	NM_001331017.1	15/17(88%)	0/17(0%)	1215-1231	9671-9655
Homo sapiens DNM3 opposite strand/antisense RNA (DNM3OS), transcript variant 1, long non-coding RNA	NR_038397.2	28/33(85%)	0/33(0%)	558-590	3822-3790
Homo sapiens DNM3 opposite strand/antisense RNA (DNM3OS), transcript variant 1, long non-coding RNA	NR_038397.2	13/13(100%)	0/13(0%)	1055-1067	5571-5559
Homo sapiens DNM3 opposite strand/antisense RNA (DNM3OS), transcript variant 1, long non-coding RNA	NR_038397.2	15/17(88%)	0/17(0%)	960-976	1456-1440
Homo sapiens DNM3 opposite strand/antisense RNA (DNM3OS), transcript variant 1, long non-coding RNA	NR_038397.2	15/17(88%)	0/17(0%)	956-972	4165-4149
Homo sapiens DNM3 opposite strand/antisense RNA (DNM3OS), transcript variant 1, long non-coding RNA	NR_038397.2	12/12(100%)	0/12(0%)	961-972	7156-7145
Homo sapiens DNM3 opposite strand/antisense RNA (DNM3OS), transcript variant 1, long non-coding RNA	NR_038397.2	12/12(100%)	0/12(0%)	1018-1029	7875-7864
